# Supplementary material for: The frequency and fitness of m6A-associated variants may be modulated by thermodynamic stability of the overlapping G-quadruplex
Source: Research Square preprint supplement (doi:10.21203/rs.3.rs-1737671/v1), 2022-06-15
Supplement: Supplementary file 2 [file 79503aafa50c937bc8268e69.docx]

**Supplementary Table 2:** Number of rare (MAF<0.01) and common (MAF≥0.01) variants which alter m6A motif number (n) inside G4 structures recorded in GSE77282 (HeLa cell line) and GSE181373 (K562, U2OS and MCF7 cell lines) datasets.

| **MEF** | **m6A Motif Number (n) Change** | | | | | |
| --- | --- | --- | --- | --- | --- | --- |
| **GSE77282** | | | **GSE181373** | | |
| **n -> n-1** | **n -> n** | **n -> n+1** | **n -> n-1** | **n -> n** | **n -> n+1** |
| **<0.01** | 6 | 184 | 5 | 443 | 7599 | 360 |
| **≥0.01** | 13 | 584 | 31 | 1316 | 24700 | 1185 |
| **p value** | >0.05 | | | >0.05 | | |
