# Supplementary material for: The frequency and fitness of m6A-associated variants may be modulated by thermodynamic stability of the overlapping G-quadruplex
Source: Research Square preprint supplement (doi:10.21203/rs.3.rs-1737671/v1), 2022-06-15
Supplement: Supplementary file 3 [file 9ad7be33ee4449f9ed77034c.xlsx]

## Sheet: n -> n
Quadruplex Region	Variant name	Variant Position (chrom)	Variant position (chromStart)	Variant position (chromEnd)	Reference Allele	Variant Allele	class	ucscNotes	MAF	Gene	Strand	p.value	Transcript	miRNA_dists	polyA_dists	annotation	class.1	Quadruplex Sequence with Reference Allele	Quadruplex Sequence with Variant Allele	Free Energy (delta G value) of G4-Quadruplex Sequence with Reference Allele	Free Energy (delta G value) of G4-Quadruplex Sequence with Variant Allele	DRACH Motif Number within Reference Sequence	DRACH Motif Number within Variant Sequence	G4-Quadruplex Number within Reference Sequence	G4-Quadruplex Number within Variant Sequence
chr12:49396523-49396553	rs77039362	chr12	49396529	49396530	C	G	snv	commonSome,rareSome,	0.0101837	PRKAG1	-	7.30239e+08	NM_002733	-141	-441	utr3	bulge	CTTCTATCTGGGAGCTAGGGAAGGTATGGGGGAGGAAAGA	CTTCTATCTGGGAGCTAGGGAAGGTATCGGGGAGGAAAGA	0	0	0	0	0	0
chr12:114404143-114404173	rs114857206	chr12	114404147	114404148	C	T	snv	commonSome,rareSome,	0.0101837	RBM19	-	0.00664116	NM_001146699	-4156	-4438	utr5	2-quartet	ACTTCCGGACAGGTCAGGCCAAGGTCTCAGCCACGTGACT	ACTTCCGGACAGGTCAGGCCAAGGTCTCAACCACGTGACT	-1.8	-1.8	2	2	0	0
chr17:48437949-48437979	rs9898777	chr17	48437967	48437968	T	C	snv	commonSome,rareSome,	0.0101837	XYLT2	+	0.00327972	NM_022167	-21	-510	utr3	2-quartet	TTTTTTTAATTTAAAAAGGAAAATGGGTGGTTGGGAGAGA	TTTTTTTAATTTAAAAAGGAAAACGGGTGGTTGGGAGAGA	-0.7	-0.7	0	0	0	0
chr19:6459705-6459735	rs578153465	chr19	6459719	6459720	C	T	snv	commonSome,commonAll,	0.0101837	SLC25A23	-	0.000170793	NM_024103	-1520	-3358	utr5	long_loop	CGGGAGCTGACCCTGCGGGGTCCCGGGGGGGGAGGGGGAG	CGGGAGCTGACCCTGCGGGATCCCGGGGGGGGAGGGGGAG	-4.8	-3.7	1	1	1	1
chr19:18679582-18679612	rs73529579	chr19	18679584	18679585	C	T	snv	commonSome,rareSome,	0.0101837	KXD1	+	0.0121363	NM_024069	-168	-545	utr3	bulge	TCTCTCCCGAGGGGTGTGGAATTCCTGGGGGGGTCTTTAA	TCTCTCCTGAGGGGTGTGGAATTCCTGGGGGGGTCTTTAA	-3.7	0	0	0	0	0
chr5:428024-428054	rs72717408	chr5	428043	428044	C	T	snv	commonSome,rareSome,	0.0101837	AHRR	+	0.0108765	NM_001242412	-4271	-1508	cds	Others	TGCGGCACCCGTTCTCCTCCCCTCCGCAGCGGAGATGAAA	TGCGGCACCCGTTCTCCTCCCCTCTGCAGCGGAGATGAAA	-3.8	-3.8	0	0	0	0
chr5:153836860-153836890	rs537153626	chr5	153836862	153836863	G	A	snv	commonSome,rareSome,	0.0101837	SAP30L	+	5.35297e+09	NM_024632	43	1003	utr3	PQs_7	TAATGGAGGGCAGAGGGTATGGGGTAGGAGGGTGGGAGAA	TAATGGAAGGCAGAGGGTATGGGGTAGGAGGGTGGGAGAA	2	2	0	0	1	1
chr6:21596981-21597011	rs139085828	chr6	21596986	21596987	G	A	snv	commonSome,rareSome,overlapDiffClass,	0.0101837	SOX4	+	0.00136062	NM_003107	-23	-1811	utr3	bulge	GGGCGGGGGCGGAGGAGGACACGAACTGGAAGGGGGTTCA	GGGCGGGGGCAGAGGAGGACACGAACTGGAAGGGGGTTCA	-0.1	-0.1	2	2	0	0
chr7:99767435-99767465	rs189831862	chr7	99767448	99767449	C	G	snv	commonSome,rareSome,	0.0101837	GPC2	-	0.0102642	NM_152742	-158	-186	utr3	bulge	TCTCAGAAATGGACCAGCTGGATGCAGGGCAGGGGACTGA	TCTCAGAAATGGACCAGCTGCATGCAGGGCAGGGGACTGA	-3.9	-3.9	2	2	0	0
chr8:75277389-75277419	rs7007283	chr8	75277398	75277399	G	A	snv	refIsMinor,clinvar,clinvarBenign,commonSome,rareSome,	0.0101837	GDAP1	+	0.0090835	NM_018972	-658	-1652	utr3	2-quartet	TCACTAGCATGTCTAGGTATTGGCTGGGTAGTGGGTATTT	TCACTAGCATGTCTGGGTATTGGCTGGGTAGTGGGTATTT	-0.6	0.1	0	0	0	0
chr2:113495693-113495723	rs138177762	chr2	113495702	113495703	T	A	snv	commonSome,rareSome,	0.0103834	CKAP2L	-	8.2915e+07	NM_152515	-70	-228	utr3	PQs_7	CAAGTAACAAAAGGGGGGCAGGGGAGAGGGGTGGGGAGTG	CAAGTAACAAAAGGGGGGCAGGGGTGAGGGGTGGGGAGTG	2.8	2.2	1	1	1	1
chr3:72427172-72427202	rs9838155	chr3	72427191	72427192	C	T	snv	commonSome,rareSome,	0.0103834	RYBP	-	6.7605e+07	NM_012234	24	-3397	utr3	PQs_7	TTTGTTTTGTTGCCGGTGGGGAGGGCTGGGAGGGGGAGGG	TTTGTTTTGTTGCCAGTGGGGAGGGCTGGGAGGGGGAGGG	-0.4	-1	0	0	1	1
chr5:177022894-177022924	rs8562	chr5	177022896	177022897	G	A	snv	commonSome,commonAll,	0.0103834	TMED9	+	1.14489e+09	NM_017510	-87	-140	utr3	long_loop	GAGTTGAGGGTGGGTGGAGGGGTTTGCAGTGTGGGAATGT	GAGTTGAAGGTGGGTGGAGGGGTTTGCAGTGTGGGAATGT	2.3	2.3	0	0	0	0
chr17:27963119-27963149	rs61737983	chr17	27963140	27963141	T	C	snv	commonSome,rareSome,	0.0105831	SSH2	-	0.0122264	NM_033389	-2241	-3515	cds	2-quartet	TCCCATTCAAGGATGGAGGAACTGGGTGGAGGAAGGAATG	TCCCATTCAAGGGTGGAGGAACTGGGTGGAGGAAGGAATG	-0.8	-0.6	1	1	0	0
chr1:154439241-154439271	rs142901087	chr1	154439266	154439267	T	G	snv	commonSome,rareSome,	0.0107827	IL6R	+	0.0114991	NM_000565	700	-2635	utr3	G_40	TCTCTTGAGCCTGGGAGGTCAAGGCTGCAGTGAGCCGAGA	TCTCTTGAGCCTGGGAGGTCAAGGCTGCAGGGAGCCGAGA	-3.8	-4.2	0	0	0	0
chr11:9685679-9685709	rs3763867	chr11	9685700	9685701	G	C	snv	commonSome,rareSome,overlapDiffClass,	0.0107827	SWAP70	+	0.0001594	NM_015055	-2185	-3603	utr5	PQs_7	GCGGAGGGGCTGGCTGGGCAGGAGGGGTTGGCGGGGCAGC	GCGGAGGGGCTGGCTGGGCAGGAGGGCTTGGCGGGGCAGC	-0.1	-0.9	0	0	1	1
chr13:41506461-41506491	rs148999272	chr13	41506474	41506475	G	T	snv	commonSome,rareSome,	0.0107827	ELF1	-	5.17381e+09	NM_172373	-65	-275	utr3	2-quartet	GGATCATTTTTTACTGGGGGCGGACTTGGGGGGGGTTGCA	GGATCATTTTTTACTGGGGGAGGACTTGGGGGGGGTTGCA	1.9	1.7	1	1	0	0
chr14:68159261-68159291	rs80140987	chr14	68159268	68159269	C	T	snv	commonSome,rareSome,	0.0107827	RDH11	-	0.000199747	NM_016026	-869	-2210	cds	bulge	TAGCTTGCCGGGATGTGGAAAAGGGGGAATTGGTGGCCAA	TAGCTTGCCGGGATGTGGAAAAGGGGAAATTGGTGGCCAA	-1.3	-1.3	0	0	0	0
chr17:75316309-75316339	rs140915871	chr17	75316327	75316328	A	G	snv	clinvar,clinvarBenign,commonSome,rareSome,overlapDiffClass,	0.0107827	SEPT9	+	0.00221089	NM_006640	-2401	-3685	utr5	bulge	AGGAGGAGGAGGCTGAGAGAGGGAGGGCGACGGGGGTGAG	AGGAGGAGGAGGCTGAGAGAGGGGGGGCGACGGGGGTGAG	1.3	1.3	0	0	0	0
chr2:101008941-101008971	rs4149522	chr2	101008948	101008949	C	T	snv	commonSome,rareSome,	0.0107827	CHST10	-	0.00827381	NM_004854	-235	-595	utr3	2-quartet	GAGGGGAGGGGAGGCTTTTTCTACCTGAGAAGGGGAGTGT	GAGGGGAGGGGAGGCTTTTTCTACCTAAGAAGGGGAGTGT	-1.5	-1.5	0	0	0	0
chr5:149776325-149776355	rs45491898	chr5	149776354	149776355	G	C	snv	clinvar,clinvarBenign,commonSome,commonAll,	0.0107827	TCOF1	+	0.000495665	NM_001135245	-458	-658	cds	2-quartet	GAGCTTCAGAAGGGGATGGGGACGGTTGAAGGTGGAGATC	GAGCTTCAGAAGGGGATGGGGACGGTTGAAGGTGCAGATC	-1.5	-1	0	0	0	0
chr9:138899770-138899800	rs115035716	chr9	138899788	138899789	G	A	snv	commonSome,rareSome,overlapDiffClass,	0.0107827	NACC2	-	0.00505418	NM_144653	151	-1366	utr3	bulge	GAGCCAGGAGGAAGGCGGAAGGTAGGGAGGGAGGGCTGGT	GAGCCAGGAGGAAGGTGGAAGGTAGGGAGGGAGGGCTGGT	-0.7	0	0	0	0	0
chr10:89623295-89623325	rs1044322	chr10	89623322	89623323	G	A	snv	clinvar,clinvarBenign,commonSome,rareSome,overlapDiffClass,	0.0109824	PTEN	+	0.0125478	NM_000314	-2222	-5396	utr5	long_loop	GGGGCGGGCAGGCCGGCGGGCGGTGATGTGGCGGGACTCT	GGGGCGGGCAGGCCGGCGGGCGGTGATGTGGCAGGACTCT	-6	-5.9	1	1	0	0
chr12:7187841-7187871	rs148718534	chr12	7187847	7187848	C	T	snv	commonSome,rareSome,	0.0109824	C1R	-	1.56245e+09	NM_001733	-83	-295	cds	2-quartet	CGTGGACTGGATCAAGAAAGAGATGGAGGAGGAGGACTGA	CGTGGACTGGATCAAGAAAGAGATGGAAGAGGAGGACTGA	0.9	0.9	2	2	0	0
chr13:77601048-77601078	rs530025281	chr13	77601051	77601052	C	G	snv	commonSome,rareSome,	0.0109824	FBXL3	-	0.000719646	NM_012158	-1392	-1421	utr5	long_loop	GCGGCTGCGGGAGCGCGAAGCGGGGGGCCAGGGGCGCCTC	GCGGCTGCGGGAGCGCGAAGCGGGGGGCCACGGGCGCCTC	-6.4	-8.9	0	0	0	0
chr15:86288877-86288907	rs185261855	chr15	86288885	86288886	G	C	snv	commonSome,rareSome,	0.0109824	AKAP13	+	0.00594106	NM_007200	-504	-3660	utr3	Others	TCTGGCCCTTGCTGGGTGAGGGCACACCACTGCCAGGGGT	TCTGGCCCTTGCTCGGTGAGGGCACACCACTGCCAGGGGT	-7.3	-7.1	0	0	0	0
chr2:10567324-10567354	rs116201507	chr2	10567338	10567339	C	T	snv	commonSome,rareSome,	0.0109824	HPCAL1	+	7.99024e+07	NM_002149	-213	-358	utr3	long_loop	TCTGTGGGAAGGGTGGGGACGAGGCGTCGGGAGGGTATAC	TCTGTGGGAAGGGTGGGGATGAGGCGTCGGGAGGGTATAC	-1.5	1	0	0	0	0
chr2:178483632-178483662	rs138529565	chr2	178483651	178483652	T	C	snv	commonSome,rareSome,	0.0109824	TTC30A	-	0.0040834	NM_152275	-4091	-2623	utr5	Others	GACCGGGAAGATTCAGTCTCTGAACGGCCCGGAGTAGTCG	GACCGGGAAGATTCGGTCTCTGAACGGCCCGGAGTAGTCG	-5.8	-4.4	0	0	0	0
chr2:211341356-211341386	rs115104544	chr2	211341366	211341367	C	T	snv	commonSome,rareSome,	0.0109824	LANCL1	-	0.00527701	NM_006055	-1951	-1589	utr5	long_loop	GTCGCGGGCGTGGGAACGGGGTTGCAAAACGGGGCCTCTT	GTCGCGGGCGTGGGAACGGGGTTACAAAACGGGGCCTCTT	-1.4	-1.4	0	0	0	0
chr3:98312385-98312415	rs75986763	chr3	98312401	98312402	G	A	snv	clinvar,clinvarBenign,commonSome,rareSome,	0.0109824	CPOX	-	0.00583858	NM_000097	-1496	-2611	utr5	long_loop	GGGGTCTGGGTGGGGGGCTCAAACGCAGGGCTCTGGGACG	GGGGTCTGGGTGGGGGGTTCAAACGCAGGGCTCTGGGACG	-2.1	-2.1	0	0	0	0
chr9:132643819-132643849	rs117436334	chr9	132643839	132643840	G	A	snv	commonSome,rareSome,	0.0109824	USP20	+	3.39484e+09	NM_001110303	812	-238	utr3	2-quartet	TTTCTATCAGTCTTTGTAGAAGCAGGTGGTGGTGGAAATT	TTTCTATCAGTCTTTGTAGAAGCAGATGGTGGTGGAAATT	-0.2	-0.2	0	0	0	0
chr10:77161098-77161128	rs576950953	chr10	77161123	77161124	G	T	snv	commonSome,rareSome,overlapDiffClass,	0.0111821	ZNF503	-	0.00654268	NM_032772	-2077	-2328	cds	2-quartet	AGCGGCGGCGGCGGCGGCGGAGGCGGAGGCGGCGGTGCAG	AGCGGCGGAGGCGGCGGCGGAGGCGGAGGCGGCGGTGCAG	-7.5	-4	0	0	0	0
chr14:69518947-69518977	rs117591245	chr14	69518958	69518959	C	G	snv	commonSome,commonAll,	0.0111821	DCAF5	-	0.000485142	NM_003861	-203	-334	utr3	2-quartet	GATGTGGATGAATTCAGGCACTGGGGGTGGGGGGGTTATT	GATGTGGATGAATTCAGGCACTCGGGGTGGGGGGGTTATT	-1.3	-0.5	0	0	0	0
chr17:27224679-27224709	rs147520554	chr17	27224692	27224693	G	T	snv	commonSome,commonAll,overlapDiffClass,	0.0111821	FLOT2	-	0.00185954	NM_004475	-1468	-2574	utr5	2-quartet	CGAGCGAGCGGGCGGCCGGCCGCTGGGGGTGGCGGGATAG	CGAGCGAGCGGGCGGCCGGCAGCTGGGGGTGGCGGGATAG	-7.3	-5	0	0	0	0
chr19:47197206-47197236	rs80021620	chr19	47197229	47197230	C	G	snv	commonSome,rareSome,	0.0111821	PRKD2	-	0.00489768	NM_016457	-1219	-1299	cds	PQs_7	AGTGGGCAGGGGGCTGAGGCCGCCCGGGGCTGGGAGACAG	AGTGGGCAGGCGGCTGAGGCCGCCCGGGGCTGGGAGACAG	-5.1	-7.5	1	1	0	0
chr9:134452455-134452485	rs138384300	chr9	134452468	134452469	G	A	snv	commonSome,commonAll,overlapDiffClass,	0.0111821	RAPGEF1	-	0.0135203	NM_005312	-177	-268	utr3	PQs_7	GTCTGTTCCTTTGGGGGGCCCGGGCGGGTTGTGGGAATCA	GTCTGTTCCTTTGGGGGGCCTGGGCGGGTTGTGGGAATCA	-0.1	0.7	0	0	1	1
chr10:77161098-77161128	rs540164655	chr10	77161117	77161118	G	T	snv	commonSome,rareSome,overlapDiffClass,	0.0113818	ZNF503	-	0.00654268	NM_032772	-2077	-2328	cds	2-quartet	AGCGGCGGCGGCGGCGGCGGAGGCGGAGGCGGCGGTGCAG	AGCGGCGGCGGCGGAGGCGGAGGCGGAGGCGGCGGTGCAG	-7.5	-3.1	0	0	0	0
chr12:110939882-110939912	rs78107102	chr12	110939884	110939885	C	A	snv	commonSome,rareSome,	0.0113818	VPS29	-	5.50608e+08	NM_016226	-667	-633	utr5	2-quartet	GAGGAGCCTGAGGAAGAGGGCGGCGACGGTGGTGGTGACT	GAGGAGCCTGAGGAAGAGGGCGGCGACGGTGTTGGTGACT	-0.9	-0.9	1	1	0	0
chr13:28867537-28867567	rs144137439	chr13	28867557	28867558	G	C	snv	commonSome,rareSome,overlapDiffClass,	0.0113818	PAN3	+	0.0132269	NM_175854	-26	-1884	utr3	2-quartet	TTTTTTTTTTTTTTTTTTTTTGGGCGGGGGGGAGGTTTAT	TTTTTTTTTTTTTTTTTTTTTGGGCCGGGGGGAGGTTTAT	1600	1	0	0	0	0
chr19:47569522-47569552	rs116422996	chr19	47569547	47569548	A	G	snv	commonSome,commonAll,	0.0113818	ZC3H4	-	0.00114111	NM_015168	-91	-2053	utr3	PQs_7	ACCCAGGGTAGGGAACTTGGGGGCAAGGGGAGGCAGGCTG	ACCCAGGGCAGGGAACTTGGGGGCAAGGGGAGGCAGGCTG	-1.7	-1.4	1	1	1	1
chr20:32005664-32005694	rs34995247	chr20	32005670	32005671	G	A	snv	clinvar,clinvarBenign,commonSome,rareSome,	0.0113818	SNTA1	-	0.00088619	NM_003098	-1190	-1467	cds	2-quartet	CAAGAACTCTACTGGTGGGACCTCGGTCGGCTGGGACTCA	CAAGAACTCTACTGGTGGGACCTCGGTTGGCTGGGACTCA	0.3	0.7	3	3	0	0
chr9:32550883-32550913	rs112527210	chr9	32550911	32550912	G	A	snv	clinvar,clinvarBenign,commonSome,commonAll,overlapDiffClass,	0.0113818	TOPORS	-	0.0092063	NM_005802	-3250	-3869	cds	2-quartet	CGCCCCCGCCTGCTCCCGCTTCGGAGGGTAGGCGGAGAAG	CGCCCTCGCCTGCTCCCGCTTCGGAGGGTAGGCGGAGAAG	-7.8	-5.3	0	0	0	0
chrX:47776219-47776249	rs145662469	chrX	47776241	47776242	G	A	snv	clinvar,clinvarBenign,commonSome,commonAll,	0.0113907	ZNF81	+	0.000830733	NM_007137	0	-905	utr3	Others	AAGGAGAGAGAATTTGCACAGCCTCATGAAATATAGTAAA	AAGGAGAGAGAATTTGCACAGCCTCATAAAATATAGTAAA	-0.4	1.3	0	0	0	0
chr12:12765045-12765075	rs759743	chr12	12765055	12765056	G	C	snv	commonSome,rareSome,overlapDiffClass,	0.0115815	CREBL2	+	0.00523224	NM_001310	-484	-2692	utr5	PQs_7	CAGGCCGGCTGAGCCGGGGGAGGGCTCCGGGAGGGAGTGC	CAGGCCGGCTGAGCCCGGGGAGGGCTCCGGGAGGGAGTGC	-4.5	-7.2	0	0	1	1
chr15:64680060-64680090	rs35604990	chr15	64680082	64680083	G	C	snv	commonSome,rareSome,overlapDiffClass,	0.0115815	TRIP4	+	0.000188671	NM_016213	-1929	-1932	cds,utr5	bulge	GGGGAAGATGGCGGTGGCTGGGGCGGTGTCCGGGGAGCCG	GGGGAAGATGGCGGTGGCTGGGGCGGTCTCCGGGGAGCCG	-0.8	-2	0	0	0	0
chr17:2276679-2276709	rs61733096	chr17	2276706	2276707	G	A	snv	commonSome,rareSome,overlapDiffClass,	0.0115815	SGSM2	+	0.00132856	NM_001098509	-1285	-2668	cds	bulge	GGCCTGCGAGGTGGTGGTGAGGCAGCGGGAGCGGGAGGCC	GGCCTGCGAGGTGGTGGTGAGGCAGCGGGAGCAGGAGGCC	-3.2	-3.2	0	0	0	0
chr4:36212322-36212352	rs35468501	chr4	36212346	36212347	C	A	snv	commonSome,rareSome,overlapDiffClass,	0.0115815	ARAP2	-	0.00181247	NM_015230	-4160	-5814	cds	Others	TAACAGAAAGGAGAAAATAAGCGAGGACAAGGTGGAAGAT	TAACAGAAATGAGAAAATAAGCGAGGACAAGGTGGAAGAT	2	0.7	2	2	0	0
chr9:136898110-136898140	rs35741216	chr9	136898138	136898139	C	T	snv	commonSome,rareSome,	0.0115815	BRD3	-	0.00262564	NM_007371	448	-1437	utr3	bulge	GGAGCGTGGAGCCCTTGGGGGGTGGTCGGGTGGGATGTGC	GGAGCATGGAGCCCTTGGGGGGTGGTCGGGTGGGATGTGC	-1.1	-2.7	0	0	0	0
chr1:20987847-20987877	rs61739382	chr1	20987854	20987855	T	G	snv	clinvar,clinvarBenign,commonSome,rareSome,	0.0117812	DDOST	-	3.78232e+09	NM_005216	-1440	-1867	cds	2-quartet	GGTGTGCACGTGCTGGGTCCTTCGGCAGGAGGAGGAAGAT	GGTGTGCACGTGCTGGGTCCTTCGGCCGGAGGAGGAAGAT	-1.4	-2.1	0	0	0	0
chr11:64035049-64035079	rs139556115	chr11	64035064	64035065	C	T	snv	commonSome,rareSome,	0.0117812	PLCB3	+	0.000467333	NM_000932	-1246	-296	utr3	PQs_7	GGCCACAGGGCCAGGGCGGGCGCTGGGTGGAGGGCAGGAG	GGCCACAGGGCCAGGGCGGGTGCTGGGTGGAGGGCAGGAG	-5.7	-4	0	0	1	1
chr11:85956140-85956170	rs2291812	chr11	85956147	85956148	G	T	snv	commonSome,commonAll,overlapDiffClass,	0.0117812	EED	+	9.69711e+07	NM_003797	-1482	-1620	utr5	2-quartet	TTGCGACAGTGGGGGGGGCGGTGGAGGTGGCGGCGGCAGC	TTGCGACAGTGGTGGGGGCGGTGGAGGTGGCGGCGGCAGC	-1.5	-1.5	0	0	0	0
chr11:118405683-118405713	rs45479397	chr11	118405699	118405700	G	A	snv	commonSome,rareSome,	0.0117812	TMEM25	+	0.00537299	NM_001144036	-92	-812	utr3	long_loop	CATGGGGGCGTGCCTGTGTGGGGGACAGGGAGGGCCCTGC	CATGGGGGCGTGCCTGTGTGGAGGACAGGGAGGGCCCTGC	-6.1	-3.8	1	1	0	0
chr12:8850634-8850664	rs74766418	chr12	8850646	8850647	G	A	snv	commonSome,rareSome,overlapDiffClass,	0.0117812	RIMKLB	+	0.000158555	NM_020734	-2929	-2874	utr5	bulge	TGTGGGAGTGAGAGTGTGTGGGAGTGGGGTGAGGGAGAAG	TGTGGGAGTGAGAGTGTATGGGAGTGGGGTGAGGGAGAAG	1600	1600	0	0	0	0
chr13:41506461-41506491	rs79062990	chr13	41506473	41506474	C	T	snv	commonSome,rareSome,overlapDiffClass,	0.0117812	ELF1	-	5.17381e+09	NM_172373	-65	-275	utr3	2-quartet	GGATCATTTTTTACTGGGGGCGGACTTGGGGGGGGTTGCA	GGATCATTTTTTACTGGGGGCAGACTTGGGGGGGGTTGCA	1.9	0.9	1	1	0	0
chr14:69518947-69518977	rs73275602	chr14	69518973	69518974	T	C	snv	commonSome,rareSome,	0.0117812	DCAF5	-	0.000485142	NM_003861	-203	-334	utr3	2-quartet	GATGTGGATGAATTCAGGCACTGGGGGTGGGGGGGTTATT	GATGTGGGTGAATTCAGGCACTGGGGGTGGGGGGGTTATT	-1.3	-1.3	0	0	0	0
chr14:89626557-89626587	rs60570667	chr14	89626569	89626570	C	A	snv	commonSome,commonAll,overlapDiffClass,	0.0117812	FOXN3	-	0.000388909	NM_005197	367	-4001	utr3	bulge	GAAATTTTCTTTAATGGCGGGGGCGGGGGGCGGGGGTACA	GAAATTTTCTTTAATGGCGGGTGCGGGGGGCGGGGGTACA	0.2	0.2	0	0	0	0
chr22:36884389-36884419	rs142834149	chr22	36884390	36884391	C	T	snv	commonSome,commonAll,	0.0117812	FOXRED2	-	0.0154447	NM_001102371	1525	-91	utr3	G_40	TGAGGCAGGAGAATTGCTTGAACCTGGGAGGTGGAGGTTG	TGAGGCAGGAGAATTGCTTGAACCTGGGAGGTAGAGGTTG	-1.4	-1.4	1	1	0	0
chr9:131457468-131457498	rs60115664	chr9	131457489	131457490	T	C	snv	commonSome,commonAll,	0.0117812	SET	+	29074.1	NM_001248001	0	-291	utr3	long_loop	TCAGCAAAGGGTGGGTTTGAGATGTTTGGGTGGGTTAAGT	TCAGCAAAGGGTGGGTTTGAGATGTTCGGGTGGGTTAAGT	0.2	0.2	0	0	0	0
chr1:21545325-21545355	rs142315334	chr1	21545326	21545327	G	A	snv	commonSome,rareSome,	0.0119808	ECE1	-	0.00575651	NM_001113348	-342	-1563	utr3	2-quartet	GTAATCCCAGCACTTTGGGAGGTTGAGGTGGGCGGATCAC	GTAATCCCAGCACTTTGGGAGGTTGAGGTGGGTGGATCAC	-2.9	-2.9	0	0	0	0
chr14:75370299-75370329	rs561155295	chr14	75370308	75370309	G	T	snv	commonSome,rareSome,	0.0119808	DLST	+	2.48286e+06	NM_001933	669	-95	utr3	PQs_7	TGAGGCCTGGGGGTGGGGGAGGGGGGAAGGGGTGGGAGCC	TGAGGCCTGGGGGTTGGGGAGGGGGGAAGGGGTGGGAGCC	0.8	0.8	0	0	1	1
chr19:7114522-7114552	rs114982195	chr19	7114547	7114548	C	T	snv	clinvar,clinvarBenign,commonSome,commonAll,	0.0119808	INSR	-	0.000543941	NM_001079817	1	170	utr3	2-quartet	ACCAGTAAGAATTTTGAGGGAGGGAGTTGGGATGGAGAAG	ACCAGTAAAAATTTTGAGGGAGGGAGTTGGGATGGAGAAG	1.5	2	0	0	0	0
chr9:33441703-33441733	rs202066241	chr9	33441708	33441709	C	A	snv	commonSome,rareSome,overlapDiffClass,	0.0119808	AQP3	-	0.000395848	NM_004925	-13	-522	utr3	bulge	CATGTGTGTGCAGGGGTGTGTGTGTGTGGGGGGGGTTCCC	CATGTGTGTGCAGGGGTGTGTGTGTGTGTGGGGGGTTCCC	-1.6	-1.7	0	0	0	0
chr13:41706785-41706815	rs9566703	chr13	41706799	41706800	G	A	snv	refIsMinor,commonSome,rareSome,	0.0121805	KBTBD6	-	0.00713376	NM_152903	-3491	-5062	utr5	bulge	AAACGATAACGGGAGGCGGTTCTGCGGGGTAGGGTTGAAT	AAACGATAACGGGAGGCGGCTCTGCGGGGTAGGGTTGAAT	-1.4	0.3	0	0	0	0
chr4:25749206-25749236	rs553728950	chr4	25749226	25749227	T	C	snv	commonSome,rareSome,overlapDiffClass,	0.0121805	SEL1L3	-	0.00950574	NM_015187	-45	-127	utr3	Others	TCTGTACAGGGATATGTGTGTGTGTGTGTGTGTGTGTGTG	TCTGTACAGGGATGTGTGTGTGTGTGTGTGTGTGTGTGTG	0.3	-0.8	0	0	0	0
chr6:118028193-118028223	rs115511966	chr6	118028195	118028196	A	G	snv	commonSome,rareSome,	0.0121805	NUS1	+	9.93451e+09	NM_138459	-16	-3545	utr3	2-quartet	TTGCATAATTTGATTTGAGGCTTGTGGAGGAAAGGAACCA	TTGCATAGTTTGATTTGAGGCTTGTGGAGGAAAGGAACCA	0.8	0.8	1	1	0	0
chr8:142432050-142432080	rs7013482	chr8	142432065	142432066	G	A	snv	commonSome,rareSome,overlapDiffClass,	0.0121805	PTP4A3	+	0.000798744	NM_032611	-1132	-1241	utr5	PQs_7	CGCTTTACTTTGGTTGGGTTGGGGGGGGCGGCGGGCTGTT	CGCTTTACTTTGGTTGGGTTAGGGGGGGCGGCGGGCTGTT	0.2	0.2	0	0	1	1
chr1:19639293-19639323	rs139369121	chr1	19639311	19639312	C	T	snv	commonSome,rareSome,	0.0123802	PQLC2	+	0.0115939	NM_017765	-1254	-1633	utr5	2-quartet	TGGTAGCCCCGAGCTGGGACGCTCCTCCCTCCACAATCTC	TGGTAGCCCCGAGCTGGGACGCTTCTCCCTCCACAATCTC	-2.7	-2.7	0	0	0	0
chr1:40661352-40661382	rs12085717	chr1	40661362	40661363	T	C	snv	commonSome,rareSome,	0.0123802	RLF	+	0.00914719	NM_012421	-5316	-5408	cds	Others	AATATTGGTTCATGTTACCAAGGAAGGGGTGTGGAAAAAC	AATATTGGTTCATGTCACCAAGGAAGGGGTGTGGAAAAAC	-2.1	-1.9	0	0	0	0
chr11:63679821-63679851	rs202007775	chr11	63679827	63679828	C	T	snv	commonSome,rareSome,	0.0123802	RCOR2	-	0.00898064	NM_173587	-752	-974	cds	2-quartet	CCCTGGAGCCCCAGTCCCCATGGAGGAGGCTAGGAGAGGG	CCCTGGAGCCCCAGTCCCCATGGAGGAAGCTAGGAGAGGG	-3.6	-3.6	0	0	0	0
chr12:62860764-62860794	rs12829785	chr12	62860793	62860794	G	A	snv	commonSome,commonAll,overlapDiffClass,	0.0123802	MON2	+	0.00453957	NM_015026	-5447	-5851	utr5	2-quartet	CTAGCGGGACGGTGCGACTGCGGGGGGCGCCTCCGAGAAA	CTAGCGGGACGGTGCGACTGCGGGGGGCGCCTCCAAGAAA	-4.4	-2.3	0	0	0	0
chr13:51938970-51939000	rs73492246	chr13	51938990	51938991	C	T	snv	commonSome,commonAll,	0.0123802	INTS6	-	0.00512229	NM_001039937	393	376	utr3	2-quartet	CGAAGCTGAAGCTGTTAGGGAGTGGTAGGTTTGGAGTACA	CGAAGCTGAAGCTATTAGGGAGTGGTAGGTTTGGAGTACA	-0.6	-1.3	0	0	0	0
chr17:8339286-8339316	rs8064417	chr17	8339306	8339307	A	G	snv	refIsMinor,commonSome,rareSome,	0.0123802	NDEL1	+	0.00196113	NM_030808	-1330	-2214	utr5	long_loop	GCGGCTGGGCGGGCCTGGCCGGGCCGGCGGAGGGGAGACG	GCGGCTGGGCGGGCCTGGCCGGGCCAGCGGAGGGGAGACG	-8.5	-8.4	0	0	0	0
chr6:37300372-37300402	rs9462296	chr6	37300394	37300395	G	T	snv	commonSome,rareSome,	0.0123802	TBC1D22B	+	0.000279727	NM_017772	125	-320	utr3	bulge	TTTGGTATTTGGTAGTGGAGGGTGGGGGGATGGGGGCCAG	TTTGGTATTTGGTAGTGGAGGGTGGGGTGATGGGGGCCAG	0.2	0.2	0	0	0	0
chr1:25071869-25071899	rs4460584	chr1	25071879	25071880	C	A	snv	commonSome,commonAll,	0.0125799	CLIC4	+	0.00107526	NM_013943	-1010	-4268	utr5	2-quartet	GCTGGCTCAGAGTGGCGCGGGGGGCGTGGGGCGGTGCTGA	GCTGGCTCAGAGTGGAGCGGGGGGCGTGGGGCGGTGCTGA	-2	-1.7	0	0	0	0
chr16:11772518-11772548	rs8191346	chr16	11772537	11772538	G	C	snv	commonSome,commonAll,overlapDiffClass,	0.0125799	SNN	+	0.00825837	NM_003498	-83	-363	utr3	bulge	CGGGGCTCGGTGAGGCACTGGGGGGGTTTTCGGGAGGAAA	CGGGGCTCGGTGAGGCACTGGGGGCGTTTTCGGGAGGAAA	-0.9	-0.9	0	0	0	0
chr16:57505967-57505997	rs7184539	chr16	57505983	57505984	T	C	snv	commonSome,rareSome,overlapDiffClass,	0.0125799	DOK4	-	0.000154602	NM_018110	-40	-75	utr3	long_loop	AGGGGAACTGGGGTCCAAAGGTCTTTGGGGAGGGAGGCAG	AGGGGAACTGGGGTCCAGAGGTCTTTGGGGAGGGAGGCAG	-1.8	-1.1	1	1	0	0
chr3:42845983-42846013	rs13316742	chr3	42845987	42845988	C	T	snv	commonSome,rareSome,overlapDiffClass,	0.0125799	HIGD1A	-	0.00412062	NM_014056	-556	-1308	utr5	long_loop	GACGGCTGTGGGTGGGGAGAAGCCGGGAGGACTGGGTGCG	GACGGCTGTGGGTGGGGAGAAGCCGGGAGAACTGGGTGCG	-3.1	-3.1	1	1	1	1
chr4:57333796-57333826	rs17524437	chr4	57333819	57333820	G	T	snv	clinvar,clinvarBenign,commonSome,rareSome,overlapDiffClass,	0.0125799	SRP72	+	5.22647e+09	NM_006947	-2068	-3196	cds,utr5	2-quartet	CTCCTCCAAGATGGCGAGCGGCGGCAGCGGGGGGGTGTCA	CTCCTCCAAGATGGCGAGCGGCGGCAGCTGGGGGGTGTCA	-6.8	-13.5	0	0	0	0
chr7:43622917-43622947	rs200156727	chr7	43622926	43622927	G	C	snv	commonSome,rareSome,overlapDiffClass,	0.0125799	STK17A	+	0.00419297	NM_004760	-1310	-1463	cds	PQs_7	GCCGGGGTCTGAGCGGGCCGTGCCGGCCGCCGCCGCCGCC	GCCGGGGTCTGAGCCGGCCGTGCCGGCCGCCGCCGCCGCC	-6.4	-7.7	0	0	0	0
chr9:33817708-33817738	rs554089142	chr9	33817729	33817730	G	C	snv	commonSome,rareSome,overlapDiffClass,	0.0125799	UBE2R2	+	0.011874	NM_017811	-777	-1462	utr5	2-quartet	TGCGTGAGGACTGGGGCCCGGGCCCGGCGCCGCCGCCGCC	TGCGTGAGGACTGGGGCCCGGGCCCGCCGCCGCCGCCGCC	-7.1	-6	1	1	0	0
chrX:151121664-151121694	rs147329678	chrX	151121682	151121683	C	A	snv	commonSome,rareSome,	0.0127152	GABRE	-	1.95492e+08	NM_004961	70	-48	utr3	bulge	TGTCTGTAATTTGTTGGGGGGTGGATAGGGTGGGGTCTCC	TGTCTGTAATTTGTTTGGGGGTGGATAGGGTGGGGTCTCC	0.1	0.1	0	0	0	0
chr10:104142540-104142570	rs77177197	chr10	104142566	104142567	G	A	snv	commonSome,rareSome,	0.0127796	GBF1	+	2.04842e+07	NM_001199379	-16	-62	utr3	long_loop	ACCATGGAGGGTAGGCAGGTGGGGGCTGGGTGGGGGACTG	ACCATGGAGGGTAGGCAGGTGGGGGCTGGGTAGGGGACTG	-0.6	-0.6	1	1	0	0
chr10:111967647-111967677	rs201906236	chr10	111967648	111967649	C	G	snv	commonSome,rareSome,overlapDiffClass,	0.0127796	MXI1	+	0.00462433	NM_130439	-799	-2398	cds	Others	TGCCCCCCGCCGTGGCCGCGCCCCAGCCCCCGGCCCTGCC	TGCCCCGCGCCGTGGCCGCGCCCCAGCCCCCGGCCCTGCC	-5.7	-5.7	0	0	0	0
chr19:541881-541911	rs16990659	chr19	541886	541887	G	A	snv	commonSome,commonAll,overlapDiffClass,	0.0127796	CDC34	+	0.00245087	NM_004359	-133	-157	utr3	PQs_7	CCACGGGGGCGCTGCTGGGAACGTGGGCGGGGGGCCGTTT	CCACGGGGGCACTGCTGGGAACGTGGGCGGGGGGCCGTTT	-3.3	-3.3	0	0	1	1
chr3:98312385-98312415	rs115030377	chr3	98312402	98312403	C	G	snv	clinvar,clinvarBenign,commonSome,rareSome,overlapDiffClass,	0.0127796	CPOX	-	0.00583858	NM_000097	-1496	-2611	utr5	long_loop	GGGGTCTGGGTGGGGGGCTCAAACGCAGGGCTCTGGGACG	GGGGTCTGGGTGGGGGCCTCAAACGCAGGGCTCTGGGACG	-2.1	-2.1	0	0	0	0
chr6:15496712-15496742	rs556092630	chr6	15496741	15496742	A	G	snv	commonSome,commonAll,overlapDiffClass,	0.0127796	JARID2	+	0.000988695	NM_004973	-2544	-4206	cds	2-quartet	TGCACTAAGGAGGTGGGGGGGCGGCAGCTGCGGGAGGGCC	TGCACTAAGGAGGTGGGGGGGCGGCAGCTGCGGGGGGGCC	-1.2	-1.2	0	0	0	0
chr8:37717941-37717971	rs113811687	chr8	37717950	37717951	C	T	snv	commonSome,commonAll,	0.0127796	RAB11FIP1	-	0.00359443	NM_025151	-141	1147	utr3	2-quartet	AGGCACAAGAATCGCTTGAGCCAGGGAGGTGGAGGTTGCA	AGGCACAAGAATCGCTTGAGCCAGAGAGGTGGAGGTTGCA	-7.1	-7.1	0	0	0	0
chr8:134470380-134470410	rs149654047	chr8	134470381	134470382	A	T	snv	commonSome,commonAll,	0.0127796	ST3GAL1	-	4.44562e+09	NM_173344	124	-3264	utr3	2-quartet	ATATTGGGGGTATCTAGGGCTTGGATGGTTTGTGGAATGT	ATATTGGGGGTATCTAGGGCTTGGATGGTTTGAGGAATGT	1.5	1.5	0	0	0	0
chr6:116574918-116574948	rs149060725	chr6	116574939	116574940	C	T	snv	commonSome,rareSome,	0.0129792	TSPYL4	-	0.00639689	NM_021648	-1403	-3733	cds	G_40	CGCGTCCCAGTTGCCGGGAGTCGCGGCGGTGCAGCGACCA	CGCGTCCCAGTTACCGGGAGTCGCGGCGGTGCAGCGACCA	-8.1	-8.1	0	0	0	0
chr7:44887587-44887617	rs545973573	chr7	44887604	44887605	G	C	snv	commonSome,rareSome,overlapDiffClass,	0.0129792	H2AFV	-	2.68974e+09	NM_012412	-441	-652	utr5	2-quartet	CGGCAGCGGGAGGGCGCGCGGCCGAGCGGAGGCGGAGTCG	CGGCAGCGGGAGGGCGGGCGGCCGAGCGGAGGCGGAGTCG	-6.8	-7.7	0	0	0	0
chr1:33476140-33476170	rs147782001	chr1	33476144	33476145	T	C	snv	commonSome,rareSome,	0.0131789	AK2	-	1.77814e+09	NM_013411	-398	-597	utr3	2-quartet	AGAAATAGACACAATATTATTTCTAAGGAATCGGGTTTTC	AGAAATAGACACAATATTATTTCTAAGGAGTCGGGTTTTC	-2.4	-2.4	1	1	0	0
chr17:42270901-42270931	rs115059104	chr17	42270921	42270922	C	T	snv	commonSome,commonAll,	0.0131789	ATXN7L3	-	0.011752	NM_001098833	4	-1705	utr3	2-quartet	CTACAGCTTCAAGGAATGGGAAAGGGAGGGTAGGAAGAGG	CTACAGCTTCAAGAAATGGGAAAGGGAGGGTAGGAAGAGG	1.1	1.1	0	0	0	0
chr19:5791105-5791135	rs367868424	chr19	5791125	5791126	A	T	snv	commonSome,rareSome,	0.0131789	DUS3L	-	0.000486783	NM_020175	-1957	-1942	cds	2-quartet	CGGCGGAGGCTCCTCTAGAGAATGGTGGTGGTGGCGACTC	CGGCGGAGGCTCCACTAGAGAATGGTGGTGGTGGCGACTC	-0.2	-1.4	0	0	0	0
chr17:40719087-40719117	rs116090103	chr17	40719106	40719107	C	A	snv	commonSome,rareSome,	0.0133786	MLX	+	0.0104351	NM_198204	-959	-972	utr5	Others	CCCGCTTCCTCGCCGCAGGGGGCCCGCCCGCTGGCCCGTT	CCCGCTTCCTCGCCGCAGGGGGCCAGCCCGCTGGCCCGTT	-6.1	-6.9	0	0	0	0
chr4:123815620-123815650	rs45446702	chr4	123815634	123815635	G	A	snv	commonSome,commonAll,	0.0133786	FGF2	+	3.48576e+07	NM_002006	-185	-282	utr3	bulge	TGGTCTCAGATACTTGGGAGGCTGAGGTGGGAGGGTTGAT	TGGTCTCAGATACTTGGGAAGCTGAGGTGGGAGGGTTGAT	-1.5	-1.3	0	0	0	0
chr5:162887060-162887090	rs73798829	chr5	162887089	162887090	C	G	snv	commonSome,commonAll,	0.0135783	NUDCD2	-	0.0074267	NM_145266	-516	-847	utr5	2-quartet	CTCCGCCTGGTGCGGCCGCGGCCGGGAGGGACTGGATTAT	CTCCCCCTGGTGCGGCCGCGGCCGGGAGGGACTGGATTAT	-7.2	-6.1	1	1	0	0
chr9:116149097-116149127	rs8177825	chr9	116149107	116149108	G	A	snv	commonSome,commonAll,	0.0135783	ALAD	-	5.09326e+08	NM_000031	609	-458	utr3	2-quartet	TGGAAGAGGAACAGAAGCAGGGTCGGGGTGGAGGGAGAAT	TGGAAGAGGAACAGAAGCAGGGTTGGGGTGGAGGGAGAAT	1.8	1.1	1	1	0	0
chr14:23778403-23778433	rs28727519	chr14	23778407	23778408	T	G	snv	commonSome,rareSome,	0.013778	BCL2L2	+	6.07004e+07	NM_001199839	-234	-2489	utr3	bulge	GAGATGTAGTCGTTCCAGGGCTGGGGGAGGTGGGAGGGAT	GAGATGTAGGCGTTCCAGGGCTGGGGGAGGTGGGAGGGAT	0.2	0.2	0	0	1	1
chr17:40353541-40353571	rs539831609	chr17	40353543	40353544	A	G	snv	commonSome,rareSome,overlapDiffClass,	0.013778	STAT5B	-	0.00276468	NM_012448	68	-2324	utr3	G_40	GTTTGTGTGTGTGTGTGTGTGTGTGTGTGTGTGCGTGTTT	GTTTGTGTGTGTGTGTGTGTGTGTGTGTGTGCGCGTGTTT	1600	1600	0	0	0	0
chr17:74945483-74945513	rs79417186	chr17	74945506	74945507	G	A	snv	commonSome,commonAll,	0.0139776	MGAT5B	+	0.000309832	NM_144677	497	-924	utr3	long_loop	TGTTTGGGATGTGGACAGAGGGGCAGGGGGCTGGGAGAAG	TGTTTGGGATGTGGACAGAGGGGCAGGGAGCTGGGAGAAG	0.2	0.1	1	1	0	0
chr6:114181421-114181451	rs189092612	chr6	114181436	114181437	G	T	snv	commonSome,rareSome,overlapDiffClass,	0.0139776	MARCKS	+	0.000668182	NM_002356	-347	-1510	cds	bulge	GAGGCGGCAGCGGGCGAGGAGGGGGCGGCGGGTGGCGACC	GAGGCGGCAGCGGGCGAGGATGGGGCGGCGGGTGGCGACC	-3	-3	0	0	0	0
chr10:77161098-77161128	rs11542744	chr10	77161111	77161112	T	G	snv	commonSome,commonAll,overlapDiffClass,	0.0141773	ZNF503	-	0.00654268	NM_032772	-2077	-2328	cds	2-quartet	AGCGGCGGCGGCGGCGGCGGAGGCGGAGGCGGCGGTGCAG	AGCGGCGGCGGCGGCGGCGGCGGCGGAGGCGGCGGTGCAG	-7.5	-13	0	0	0	0
chr11:120097541-120097571	rs873058	chr11	120097550	120097551	G	A	snv	commonSome,rareSome,overlapDiffClass,	0.0141773	OAF	+	0.00186699	NM_178507	-559	-1183	cds	2-quartet	GCAGTGCGGCAGGCGGAGGAGGTTCGGGGTCTGGAGCATC	GCAGTGCGGCAGGCAGAGGAGGTTCGGGGTCTGGAGCATC	0.1	-1.3	0	0	0	0
chr15:90623909-90623939	rs72758622	chr15	90623927	90623928	C	G	snv	commonSome,commonAll,	0.0141773	ZNF710	+	0.0148574	NM_198526	315	-1466	utr3	2-quartet	GGGGGAGGCCCAGGACCACCTGTCGGGGAGGGGGACCGCA	GGGGGAGGCCCAGGACCACCTGTGGGGGAGGGGGACCGCA	-7.2	-7.2	2	2	0	0
chr16:57792517-57792547	rs116107331	chr16	57792539	57792540	C	T	snv	commonSome,rareSome,	0.0141773	KIFC3	-	1.43151e+07	NM_001130100	249	-360	utr3	long_loop	CCCGTGAGGAGGGCGGGAGTGTGGAGGAGGGTGGGCCTCT	CCCGTGAGGAGAGCGGGAGTGTGGAGGAGGGTGGGCCTCT	-3.1	-3.1	0	0	0	0
chr19:5622820-5622850	rs10411746	chr19	5622849	5622850	C	T	snv	commonSome,commonAll,overlapDiffClass,	0.0141773	SAFB2	-	0.00847438	NM_014649	-3082	-3106	utr5	2-quartet	CGCGGCCGCAAAGCGGGGCGGGAGGAAACGAGTGCGTTTT	CGCGACCGCAAAGCGGGGCGGGAGGAAACGAGTGCGTTTT	-4.2	-5.9	0	0	0	0
chr2:110260146-110260176	rs114110701	chr2	110260147	110260148	G	A	snv	commonSome,rareSome,	0.0141773	SH3RF3	+	1.62032e+08	NM_001099289	162	-2015	utr3	long_loop	GCTGGCGGGGTGGATCCATTGAGGGGGTCGGAGGGAGCTT	GCTGGCAGGGTGGATCCATTGAGGGGGTCGGAGGGAGCTT	-1.2	-1.2	0	0	0	0
chr5:176085600-176085630	rs76178706	chr5	176085622	176085623	G	C	snv	commonSome,commonAll,overlapDiffClass,	0.014377	TSPAN17	+	8.18459e+08	NM_130465	882	-403	utr3	bulge	TTGAGACCAAGAGAGTGCGGTGGGGATGGGGGGGAGAGCA	TTGAGACCAAGAGAGTGCGGTGGGGATCGGGGGGAGAGCA	0.3	0.3	1	1	0	0
chr11:20142580-20142610	rs74499419	chr11	20142596	20142597	G	C	snv	commonSome,rareSome,	0.0145767	NAV2	+	577921	NM_001111018	92	-511	utr3	PQs_7	CTTTTAAGTTTCATTAGGGGTGGGGTGGGAGTGGGACAGG	CTTTTAAGTTTCATTAGGGGTCGGGTGGGAGTGGGACAGG	0	0	1	1	1	1
chr16:57792517-57792547	rs185400827	chr16	57792531	57792532	A	G	snv	commonSome,rareSome,overlapDiffClass,	0.0145767	KIFC3	-	1.43151e+07	NM_001130100	249	-360	utr3	long_loop	CCCGTGAGGAGGGCGGGAGTGTGGAGGAGGGTGGGCCTCT	CCCGTGAGGAGGGCGGGAGCGTGGAGGAGGGTGGGCCTCT	-3.1	-3.1	0	0	0	0
chr16:58079123-58079153	rs41504346	chr16	58079126	58079127	A	G	snv	commonSome,rareSome,overlapDiffClass,	0.0145767	MMP15	+	0.000580299	NM_002428	-440	-1631	cds	PQs_7	CGTGGGGGATGGGGATGGGGACTTTGGGGCCGGGGTCAAC	CGTGGGGGGTGGGGATGGGGACTTTGGGGCCGGGGTCAAC	1.3	1.3	1	1	1	1
chr9:94486027-94486057	rs56091954	chr9	94486048	94486049	C	T	snv	clinvar,clinvarBenign,commonSome,rareSome,	0.0145767	ROR2	-	0.000266962	NM_004560	-692	-1126	cds	2-quartet	CCAGAGCACCGTGCAGGAAGCAGAGGAGGAGGAGGAAGGC	CCAGAGCACCGTACAGGAAGCAGAGGAGGAGGAGGAAGGC	-1.4	-0.7	0	0	0	0
chr1:154938952-154938982	rs11552300	chr1	154938953	154938954	C	T	snv	commonSome,commonAll,overlapDiffClass,	0.0147764	SHC1	-	0.000718631	NM_003029	-939	-2214	cds	2-quartet	GGCTTTGATGGCTCAGCATGGGATGAGGAGGAGGAAGAGC	GGCTTTGATGGCTCAGCATGGGATGAGGAGGAAGAAGAGC	-0.9	-0.9	0	0	0	0
chr19:34712590-34712620	rs2274896	chr19	34712617	34712618	G	A	snv	commonSome,rareSome,	0.0147764	LSM14A	+	0.000108134	NM_015578	-154	-732	cds	bulge	TCGCGGTGGATTCAGAGGAGGTCGTGGGGGCCGGGAGTTT	TCGCGGTGGATTCAGAGGAGGTCGTGGGGGCCAGGAGTTT	-3.2	-2.5	0	0	0	0
chr2:45236267-45236297	rs113836842	chr2	45236275	45236276	G	A	snv	commonSome,commonAll,overlapDiffClass,	0.0147764	SIX2	-	0.000153131	NM_016932	-1796	-1860	utr5	bulge	CCGCGCGGCCCGGTGAGGGCGCGCGCGGGCGGGCGGGGAC	CCGCGCGGCCCGGTGAGGGCGCGCGTGGGCGGGCGGGGAC	-14.8	-13.1	0	0	1	1
chr5:179151740-179151770	rs75423033	chr5	179151757	179151758	A	G	snv	commonSome,rareSome,overlapDiffClass,	0.0147764	CANX	+	4.30769e+08	NM_001746	-351	-757	cds	2-quartet	GAGGAAAAGGACAAGGGAGATGAGGAGGAGGAAGGAGAAG	GAGGAAAAGGACAAGGGAGATGGGGAGGAGGAAGGAGAAG	2	2	1	1	0	0
chr1:204391950-204391980	rs61758024	chr1	204391972	204391973	C	G	snv	commonSome,rareSome,overlapDiffClass,	0.014976	PIK3C2B	-	6.74267e+07	NM_002646	-103	-166	utr3	bulge	GCTTCCAGGAGGGGGAAGAGGAGTGGGGAGTGGGCGGTGA	GCTTCCAGGAGCGGGAAGAGGAGTGGGGAGTGGGCGGTGA	-2.1	-2.1	0	0	0	0
chr15:66994804-66994834	rs558891070	chr15	66994821	66994822	G	T	snv	commonSome,rareSome,	0.014976	SMAD6	+	0.00958847	NM_005585	-2326	-2382	utr5	G_40	GCGCACGAAGCGTCCGAGGGCAGCGTGGGGCGGGCTGCGA	GCGCACGAAGCGTCCGAGGGCATCGTGGGGCGGGCTGCGA	-5.3	-6.1	0	0	0	0
chr17:45789253-45789283	rs76756663	chr17	45789278	45789279	G	A	snv	commonSome,commonAll,	0.014976	TBKBP1	+	0.00137514	NM_014726	-4	-116	utr3	2-quartet	AGAGCAGGGGAGTGAAGGGGTATGTCAGGCGGGGAAGGGG	AGAGCAGGGGAGTGAAGGGGTATGTCAGGCAGGGAAGGGG	1.2	0.9	0	0	0	0
chr8:37612553-37612583	rs112010566	chr8	37612573	37612574	G	C	snv	commonSome,commonAll,	0.014976	ERLIN2	+	9.14337e+09	NM_007175	338	799	utr3	2-quartet	GTGAAGAGGTCTGACACCATGTGTGGAGGAGGAGGAACGA	GTGAAGAGGTCTGACACCATGTGTGCAGGAGGAGGAACGA	-1	-1.4	1	1	0	0
chr19:14492267-14492297	rs115061086	chr19	14492296	14492297	T	G	snv	commonSome,commonAll,	0.0151757	CD97	+	0.00737131	NM_001784	-2310	-2849	utr5	Others	CCTAGCCTGTGGAGACGGGACAGCCCTGTCCCACTCACTC	CCTAGCCTGTGGAGACGGGACAGCCCTGTCCCACGCACTC	-7.1	-7.1	1	1	0	0
chr20:3628899-3628929	rs16988807	chr20	3628902	3628903	A	G	snv	commonSome,commonAll,	0.0151757	ATRN	+	0.00782931	NM_139321	0	-1099	utr3	2-quartet	AAAAGCACATGGAAAAAAATGGATGAGGAGGGAAAACTCT	AAAAGCACGTGGAAAAAAATGGATGAGGAGGGAAAACTCT	0.3	0.3	1	1	0	0
chr3:188603926-188603956	rs76822111	chr3	188603945	188603946	G	T	snv	commonSome,commonAll,overlapDiffClass,	0.0151757	LPP	+	0.013359	NM_001167672	-765	-4483	utr3	bulge	ACACTCTGGGGACTGTTGTGGGGTGGAGGGAGGAGGGAGG	ACACTCTGGGGACTGTTGTGGGGTTGAGGGAGGAGGGAGG	-1.4	-1.4	1	1	0	0
chr6:36894383-36894413	rs200922615	chr6	36894412	36894413	G	T	snv	commonSome,commonAll,overlapDiffClass,	0.0151757	C6orf89	+	0.00211099	NM_152734	-492	2067	utr3	PQs_7	AGGGGAGGGGAGGAGAGGAGAGCAGATTGGGGGGGCTCAT	AGGGGAGGGGAGGAGAGGAGAGCAGATTGGGGGGTCTCAT	-0.9	0.6	0	0	0	0
chr7:148952591-148952621	rs143805564	chr7	148952615	148952616	C	T	snv	commonSome,commonAll,	0.0151757	ZNF212	+	0.00021815	NM_012256	749	-42	utr3	PQs_7	GCTGCTGTCTGGGGGGATGGGAGTGGGCTCTGGGGTCATA	GCTGCTGTCTGGGGGGATGGGAGTGGGCTTTGGGGTCATA	0	1.2	0	0	1	1
chr1:205473945-205473975	rs4951006	chr1	205473973	205473974	G	C	snv	refIsMinor,commonSome,rareSome,overlapDiffClass,	0.0153754	CDK18	+	0.00179324	NM_002596	-2005	-2865	utr5	bulge	GTGCGCCTGGGAGGAAGGGGGAGGTCGGAGGAGCGGGCAC	GTGCGCCTGGGAGGAAGGGGGAGGTCGGAGGAGGGGGCAC	-2	-4.6	0	0	0	0
chr15:100268092-100268122	rs78284811	chr15	100268094	100268095	C	A	snv	commonSome,commonAll,	0.0153754	LYSMD4	-	0.000580378	NM_152449	940	-454	utr3	bulge	TGGTGCTGCCCTGTGGCATGGAGGGGTGGGAGGGGCTGAG	TGGTGCTGCCCTGTGGCATGGAGGGGTGGGATGGGCTGAG	-2.7	-2.7	0	0	0	0
chr18:29522753-29522783	rs529871235	chr18	29522767	29522768	A	C	snv	commonSome,commonAll,	0.0153754	TRAPPC8	-	0.00579685	NM_014939	-4353	-5125	utr5	PQs_7	GCAGGATAACCTCGCAGGGTGGGCCGGAGGGCGGGCGCCG	GCAGGATAACCTCGCAGGGGGGGCCGGAGGGCGGGCGCCG	-1.3	-4.3	1	1	1	1
chr2:33809955-33809985	rs11893662	chr2	33809983	33809984	A	G	snv	commonSome,rareSome,overlapDiffClass,	0.0153754	FAM98A	-	3.35943e+09	NM_015475	-824	-1206	cds	2-quartet	GGTGGTCGTGCAGGCCAGGGAGGAGGCTGGGGAGGAAGAG	GGTGGCCGTGCAGGCCAGGGAGGAGGCTGGGGAGGAAGAG	-0.7	-5.2	0	0	0	0
chr22:39096286-39096316	rs76032492	chr22	39096289	39096290	C	T	snv	commonSome,commonAll,overlapDiffClass,	0.0153754	JOSD1	-	1.37615e+08	NM_014876	-1032	-3229	utr5	PQs_7	GGGGATTTTGGAGGGGGGTGGGAGGGAAGGGTGGGGAAAC	GGGGATTTTGGAGGGGGGTGGGAGGGAAGGATGGGGAAAC	1.4	3	0	0	1	1
chr7:135613046-135613076	rs116648775	chr7	135613048	135613049	C	T	snv	commonSome,rareSome,overlapDiffClass,	0.0153754	LUZP6	-	0.000346941	NM_001128619	-1265	-1517	utr5	bulge	GGTGTGTGGGTGTATAGGTGTGTGTGGGTGTGTGTGTGTA	GGTGTGTGGGTGTATAGGTGTGTGTGGGTGTATGTGTGTA	4.3	3.1	0	0	0	0
chr19:19449707-19449737	rs117955413	chr19	19449718	19449719	C	T	snv	commonSome,rareSome,	0.0155751	MAU2	+	0.00354732	NM_015329	-1536	-3256	cds	long_loop	GTGTAGGGGCCGAGTACGCCCGGGTGGTGGGATCTGAATA	GTGTAGGGGCCGAGTATGCCCGGGTGGTGGGATCTGAATA	-2.9	-2.3	0	0	0	0
chr9:35547132-35547162	rs79315294	chr9	35547140	35547141	C	A	snv	commonSome,rareSome,	0.0155751	RUSC2	+	0.000918035	NM_014806	-3928	-4395	cds	2-quartet	GAGTGTGGGGGACCTGGTGGGAGTGGCAGTGGGGGTGGAG	GAGTGTGGGGGACATGGTGGGAGTGGCAGTGGGGGTGGAG	-0.5	0	1	1	0	0
chr10:74035342-74035372	rs13618	chr10	74035346	74035347	G	A	snv	commonSome,commonAll,overlapDiffClass,	0.0157748	DDIT4	+	3.85378e+08	NM_019058	-80	-401	utr3	bulge	CCGGAGGGAGGGGGGAGGTCGGAGGTCGTGGAGGTGGTTT	CCGGAGGGAAGGGGGAGGTCGGAGGTCGTGGAGGTGGTTT	-0.8	-0.8	0	0	0	0
chr13:43930127-43930157	rs2281712	chr13	43930139	43930140	C	T	snv	commonSome,rareSome,	0.0157748	ENOX1	-	0.00196328	NM_001127615	-1547	-1601	cds	2-quartet	GCGGCACCGGCGCAAGCTGGAGGAGGACCGGCTCAGGCCC	GCGGCACCGGCGCAAGCTGGAAGAGGACCGGCTCAGGCCC	-5.7	-5.7	1	1	0	0
chr17:1367631-1367661	rs78635371	chr17	1367635	1367636	C	T	snv	commonSome,commonAll,	0.0157748	MYO1C	-	0.000183015	NM_001080950	0	-128	utr3	long_loop	TGGGGACGGGGCTGGCCTTGGGAGGAGCGGCAGGGGCATC	TGGGGACGGGGCTGGCCTTGGGAGGAGCGACAGGGGCATC	-2.2	-5.2	0	0	0	0
chr2:86850439-86850469	rs143100649	chr2	86850468	86850469	G	A	snv	commonSome,rareSome,	0.0157748	RNF103	-	0.012278	NM_005667	-2504	-2905	utr5	Others	CCGCCCGGATCCCCGCCTCCTGGGCGGATCTGAGTTATTT	CCGCTCGGATCCCCGCCTCCTGGGCGGATCTGAGTTATTT	-8	-9.4	0	0	0	0
chr5:140050655-140050685	rs57919623	chr5	140050666	140050667	C	T	snv	commonSome,commonAll,	0.0157748	DND1	-	0.0094094	NM_194249	125	-254	utr3	Others	TGGTGAGGGGCCTTGCCCTCCCGCTCCCAGCCCAGGGTCC	TGGTGAGGGGCCTTGCCCTCCCACTCCCAGCCCAGGGTCC	-4.2	-4.2	0	0	0	0
chr7:155437513-155437543	rs553662089	chr7	155437536	155437537	T	G	snv	commonSome,rareSome,overlapDiffClass,	0.0157748	RBM33	+	0.00122776	NM_053043	-3578	-6176	utr5	2-quartet	AGGCACGTCGGCCCACCAGCTGGCTTGGTGGGGGAGGCTG	AGGCACGTCGGCCCACCAGCTGGCTTGGGGGGGGAGGCTG	-6.2	-5.5	0	0	0	0
chr12:1137189-1137219	rs35037408	chr12	1137216	1137217	A	G	snv	commonSome,commonAll,	0.0159744	ERC1	+	0.00623973	NM_178040	-3293	-7747	cds	bulge	GAGGGAGTTCGGGAAGCAGTGTTGGAGGTGGCAGTGGGAA	GAGGGAGTTCGGGAAGCAGTGTTGGAGGTGGCGGTGGGAA	-0.3	1.5	0	0	0	0
chr17:80196857-80196887	rs114517919	chr17	80196876	80196877	C	T	snv	commonSome,rareSome,	0.0159744	SLC16A3	+	9.78252e+08	NM_004207	-138	-438	utr3	2-quartet	GTGGCTGGGCGGGGCCGGCAGGCACAGGGAGGAGGTACAG	GTGGCTGGGCGGGGCCGGCAGGCATAGGGAGGAGGTACAG	-7.4	-5.2	0	0	0	0
chr22:18571292-18571322	rs141229564	chr22	18571304	18571305	A	G	snv	clinvar,clinvarBenign,commonSome,rareSome,overlapDiffClass,	0.0159744	PEX26	+	8.11081e+08	NM_017929	150	80	utr3	2-quartet	TAATCCCAGCACTTTGGAAGGGTGAGGTGGGTGGATCACT	TAATCCCAGCACTTTGGGAGGGTGAGGTGGGTGGATCACT	-1.5	-2.9	0	0	0	0
chr22:18572098-18572128	rs73876563	chr22	18572123	18572124	C	T	snv	clinvar,clinvarBenign,commonSome,commonAll,	0.0159744	PEX26	+	0.000167084	NM_017929	36	-35	utr3	bulge	AATCAGGTGAGCTGGAAGGGATGTGGGGGGCGGGGCAGAC	AATCAGGTGAGCTGGAAGGGATGTGGGGGGTGGGGCAGAC	1.2	1.2	0	0	0	0
chr8:82671259-82671289	rs113344155	chr8	82671270	82671271	G	T	snv	commonSome,commonAll,	0.0159744	CHMP4C	+	0.00706742	NM_152284	-203	200	utr3	bulge	TACATTTAGTATAGCGGGGGGTGGGGGGGAGAAATAATGT	TACATTTAGTATAGCGTGGGGTGGGGGGGAGAAATAATGT	0.3	0.3	0	0	0	0
chr10:34398970-34399000	rs77971093	chr10	34398981	34398982	G	A	snv	commonSome,rareSome,	0.0161741	PARD3	-	0.00141232	NM_019619	-232	-457	utr3	2-quartet	AGAACATTTTCGGGTCCCACAGCGGTGGTGGCAGGAAGCT	AGAACATTTTCGGGTCCCACAGTGGTGGTGGCAGGAAGCT	-2.2	-2.2	1	1	0	0
chr14:45605453-45605483	rs61746895	chr14	45605462	45605463	A	G	snv	clinvar,clinvarBenign,commonSome,rareSome,	0.0161741	FANCM	+	4.86365e+08	NM_020937	-6378	-6755	cds	Others	ATGGCGGGTTCTGCACCTCCGCGGGCGCCCTGTGGATTTA	ATGGCGGGTTCTGCGCCTCCGCGGGCGCCCTGTGGATTTA	-2.8	-5.2	0	0	0	0
chr6:43129314-43129344	rs56739823	chr6	43129332	43129333	G	A	snv	commonSome,rareSome,overlapDiffClass,	0.0163738	PTK7	+	0.000391004	NM_002821	-37	-88	utr3	PQs_7	AGGTAGGGGTGGGCCCTGGAGATGAGGAGGGTGGGCCATC	AGGTAGGGGTGGGCCCTGGAGATAAGGAGGGTGGGCCATC	-3.7	-3.7	0	0	0	0
chr1:23834611-23834641	rs2811970	chr1	23834637	23834638	C	T	snv	commonSome,rareSome,	0.0165735	E2F2	-	0.0117219	NM_004091	184	-1664	utr3	Others	AGGAGTGGTCAGCGGGTCACAGCTGCCCCCACTCTATAAG	AGGAGTGATCAGCGGGTCACAGCTGCCCCCACTCTATAAG	-6.4	-5.6	0	0	0	0
chr14:102676251-102676281	rs3742432	chr14	102676265	102676266	C	T	snv	commonSome,rareSome,	0.0165735	WDR20	+	0.00651495	NM_144574	-7	-548	utr3	Others	TAGTGACTTTTTTCTTTTTCGTGGGAGGGGTGGGGTGTAC	TAGTGACTTTTTTCTTTTTTGTGGGAGGGGTGGGGTGTAC	1.4	1.5	1	1	0	0
chr16:46655195-46655225	rs6598679	chr16	46655209	46655210	G	A	snv	refIsMinor,commonSome,rareSome,	0.0165735	SHCBP1	-	0.000115154	NM_024745	-1978	-2139	cds	bulge	GCCATGGCGCCGGAGCGCATGGGCTGGGCGGTGGAGCAGG	GCCATGGCGCCGGAGCGCACGGGCTGGGCGGTGGAGCAGG	-7.9	-7.8	0	0	0	0
chrX:47004808-47004838	rs12008422	chrX	47004837	47004838	C	T	snv	commonSome,rareSome,	0.0166887	RBM10	+	0.00212305	NM_001204467	-3072	-3174	utr5	bulge	CTGAGCTGGGAGAGTTGGAGGAGGTGGCGGCGGGCAGAGG	CTGAGCTGGGAGAGTTGGAGGAGGTGGCGGCGGGTAGAGG	0.2	1.7	0	0	0	0
chr16:1756351-1756381	rs201073807	chr16	1756378	1756379	G	A	snv	commonSome,rareSome,	0.0167732	MAPK8IP3	+	0.0012643	NM_001040439	-4067	-5425	cds	2-quartet	GAGATCCAGATGGACGAGGGCGGCGGCGTGGTGGTGTACC	GAGATCCAGATGGACGAGGGCGGCGGCGTGGTAGTGTACC	-1.3	-0.6	0	0	0	0
chr19:18475749-18475779	rs554035257	chr19	18475758	18475759	C	T	snv	commonSome,commonAll,overlapDiffClass,	0.0167732	PGPEP1	+	0.00913803	NM_017712	-1387	-4960	utr3	long_loop	GGTGGCGCGGGGGGCTCAAAACGGGGGCGCGGGGGCTGGA	GGTGGCGCGGGGGGTTCAAAACGGGGGCGCGGGGGCTGGA	-2	-2	0	0	0	0
chr1:51753278-51753308	rs72904275	chr1	51753291	51753292	A	G	snv	commonSome,rareSome,	0.0171725	TTC39A	-	0.0139512	NM_001144832	233	-273	utr3	Others	AATGCTTCTGGGGTTGGGCATGAGGATGTACACAGACACC	AATGCTTCTGGGGTTGGGCACGAGGATGTACACAGACACC	-1.2	-0.5	1	1	0	0
chr1:51753278-51753308	rs72904276	chr1	51753296	51753297	C	T	snv	commonSome,rareSome,	0.0171725	TTC39A	-	0.0139512	NM_001144832	233	-273	utr3	Others	AATGCTTCTGGGGTTGGGCATGAGGATGTACACAGACACC	AATGCTTCTGGGGTTAGGCATGAGGATGTACACAGACACC	-1.2	-0.5	1	1	0	0
chr15:93568418-93568448	rs74357242	chr15	93568426	93568427	G	A	snv	commonSome,rareSome,	0.0171725	CHD2	+	1.12236e+09	NM_001271	6	-2700	utr3	long_loop	GATGGGGAGTGGCGAGTTGGGGCAAGCGGGTGGGGACAAG	GATGGGGAGTGGCAAGTTGGGGCAAGCGGGTGGGGACAAG	-0.2	-0.2	1	1	0	0
chr5:176085600-176085630	rs77802851	chr5	176085624	176085625	G	C	snv	commonSome,rareSome,overlapDiffClass,	0.0171725	TSPAN17	+	8.18459e+08	NM_130465	882	-403	utr3	bulge	TTGAGACCAAGAGAGTGCGGTGGGGATGGGGGGGAGAGCA	TTGAGACCAAGAGAGTGCGGTGGGGATGGCGGGGAGAGCA	0.3	0.3	1	1	0	0
chr12:105322241-105322271	rs61745056	chr12	105322261	105322262	C	A	snv	commonSome,rareSome,	0.0173722	SLC41A2	-	0.0155214	NM_032148	-1706	-1863	cds	Others	GATAAAACAAGTGGTGGTCCAAGTAGTGGAGGAGGTTTTG	GATAAAACAAGTGTTGGTCCAAGTAGTGGAGGAGGTTTTG	-1.8	-1.8	1	1	0	0
chr7:43916765-43916795	rs2232107	chr7	43916781	43916782	G	A	snv	commonSome,rareSome,	0.0173722	URGCP	-	0.00431576	NM_001077663	-655	-1233	cds	2-quartet	GGCTTGATAGGTGGGGCCTTGACGTCAGCTGGGGACAGAT	GGCTTGATAGGTGGGGCTTTGACGTCAGCTGGGGACAGAT	-1.5	-1.5	1	1	0	0
chr1:65157435-65157465	rs17126892	chr1	65157459	65157460	G	C	snv	commonSome,commonAll,	0.0175719	CACHD1	+	0.0140241	NM_020925	-91	-1252	utr3	2-quartet	TGTGAAGATGTGAGGCTGGTTCTGAAATGGAGGGGAAATA	TGTGAAGATGTGAGGCTGGTTCTGAAATGCAGGGGAAATA	1.9	-0.4	0	0	0	0
chr20:627349-627379	rs112409244	chr20	627365	627366	C	T	snv	commonSome,commonAll,	0.0177716	SRXN1	-	2.55322e+07	NM_080725	362	-60	utr3	bulge	TAAGATGTTGACCTTGGGGTAGGCTGGGTGAAGGGTATAC	TAAGATGTTGACCTTGGAGTAGGCTGGGTGAAGGGTATAC	-0.6	-0.2	1	1	0	0
chr12:112247529-112247559	rs58352818	chr12	112247531	112247532	T	C	snv	commonSome,rareSome,	0.0179712	ALDH2	+	0.0118242	NM_000690	-178	-204	utr3	2-quartet	TTTGAATTGATAAACATGGTGGGTTGGCTGAGGGTAAGAG	TTTGAATCGATAAACATGGTGGGTTGGCTGAGGGTAAGAG	0.8	0.8	1	1	0	0
chr17:40353545-40353575	rs1869364	chr17	40353568	40353569	C	A	snv	commonSome,commonAll,overlapDiffClass,	0.0179712	STAT5B	-	0.00129662	NM_012448	64	-2328	utr3	G_40	ATGTGTTTGTGTGTGTGTGTGTGTGTGTGTGTGTGTGCGT	ATGTGTTTGTTTGTGTGTGTGTGTGTGTGTGTGTGTGCGT	1600	1600	0	0	0	0
chr1:46597954-46597984	rs74072313	chr1	46597975	46597976	G	A	snv	commonSome,commonAll,	0.0183706	PIK3R3	-	0.00121788	NM_003629	-1782	-5225	utr5	2-quartet	AAGTGGCTTCCGCGGAAAGATTTGGAGGCGGTGGGAGCTT	AAGTGGCTTCCGTGGAAAGATTTGGAGGCGGTGGGAGCTT	-2	-1.9	0	0	0	0
chr1:46597954-46597984	rs74072314	chr1	46597976	46597977	C	A	snv	commonSome,commonAll,	0.0183706	PIK3R3	-	0.00121788	NM_003629	-1782	-5225	utr5	2-quartet	AAGTGGCTTCCGCGGAAAGATTTGGAGGCGGTGGGAGCTT	AAGTGGCTTCCTCGGAAAGATTTGGAGGCGGTGGGAGCTT	-2	-1.8	0	0	0	0
chr1:154600364-154600394	rs6426859	chr1	154600371	154600372	G	A	snv	refIsMinor,commonSome,rareSome,	0.0183706	ADAR	-	0.00290496	NM_001025107	-4337	-6414	utr5	PQs_7	GGGGAGGGTCGCGGCCGCACTGGCAGTCTCCGGGTGTCCG	GGGGAGGGTCGCGGCCGCACTGGCAGCCTCCGGGTGTCCG	-1.9	-7.3	0	0	0	0
chr10:22830852-22830882	rs62640376	chr10	22830856	22830857	G	A	snv	commonSome,rareSome,	0.0185703	PIP4K2A	-	0.0139496	NM_005028	-420	-2511	cds	bulge	GAGAACGATGGGGAGGAGGAGGGCGAGAGCGATGGCACCC	GAGAACGATGGGGAGGAGGAGGGCGAGAGTGATGGCACCC	-1	-0.4	0	0	0	0
chr20:56225479-56225509	rs6015050	chr20	56225499	56225500	C	G	snv	commonSome,rareSome,	0.0185703	PMEPA1	-	0.00718463	NM_199169	-177	-2004	utr3	bulge	ATAGAGGTGACCAGAGGAGAGCATGAGGGGTGGGGCTTTG	ATAGAGGTGACCACAGGAGAGCATGAGGGGTGGGGCTTTG	0.6	-1.4	1	1	0	0
chr16:87864250-87864280	rs111922215	chr16	87864277	87864278	C	A	snv	commonSome,commonAll,	0.0189696	SLC7A5	-	3.67545e+08	NM_003486	-540	-601	utr3	2-quartet	GGGTGGGAGCTCCTCCGCAGAAGGTTGGTGGGGGGTCCAG	GGGTGGTAGCTCCTCCGCAGAAGGTTGGTGGGGGGTCCAG	-3	-3	0	0	0	0
chr19:56090509-56090539	rs117911884	chr19	56090523	56090524	G	A	snv	commonSome,rareSome,	0.0189696	ZNF579	-	0.000556332	NM_152600	-1373	-1593	cds	2-quartet	ACCACCGCTGCAGCAGGGGCCACGGAGGAGGAGGCGGTCG	ACCACCGCTGCAGCAGGGGTCACGGAGGAGGAGGCGGTCG	-4.5	-5.5	0	0	0	0
chr1:38279664-38279694	rs573406501	chr1	38279681	38279682	T	A	snv	commonSome,rareSome,overlapDiffClass,	0.0191693	MTF1	-	0.00810731	NM_005955	-22	898	utr3	Others	GTCATGTGATTTATTTAAAAAAAAAAAAAAAAGAAACACA	GTCATGTGATTTATTTTAAAAAAAAAAAAAAAGAAACACA	-2.6	-3.7	1	1	0	0
chr16:67063095-67063125	rs554672034	chr16	67063100	67063101	G	A	snv	commonSome,commonAll,overlapDiffClass,	0.0191693	CBFB	+	0.00139422	NM_001755	-864	-3038	utr5	2-quartet	AGGCGGCGGCGGCGGCGGCGGCGGCGTGGGTTGGGCTCGA	AGGCGGCGGCAGCGGCGGCGGCGGCGTGGGTTGGGCTCGA	-13	-9.8	0	0	0	0
chr19:14629157-14629187	rs114733595	chr19	14629161	14629162	G	A	snv	commonSome,rareSome,	0.0191693	DNAJB1	-	0.000134456	NM_006145	-1036	-2166	cds,utr5	long_loop	CAGCGGGTCGGCGGGCCGCAGGAGGGGGTCATGGGTAAAG	CAGCGGGTCGGCGGGCCGCAGGAGGGGGTTATGGGTAAAG	-1.3	-0.9	0	0	0	0
chr6:132781750-132781780	rs79028092	chr6	132781766	132781767	A	G	snv	commonSome,rareSome,	0.0191693	STX7	-	8.77786e+09	NM_003569	0	-2664	utr3	2-quartet	ATACTTTGTTATTTTTATTGGGGGGGTTGGGGTGGTTCCT	ATACTTTGTTATTTTTACTGGGGGGGTTGGGGTGGTTCCT	0.7	0.7	0	0	0	0
chr7:72350153-72350183	rs191728005	chr7	72350180	72350181	C	A	snv	commonSome,commonAll,	0.019369	POM121	+	0.013015	NM_172020	-4196	-5726	utr5	bulge	CAGAGGGGCCAGGCGGGAGGTGGTGGCGGAGGCGAAGGGG	CAGAGGGGCCAGGCGGGAGGTGGTGGCGGAGGAGAAGGGG	-1	-1	0	0	0	0
chr11:6411764-6411794	rs79282481	chr11	6411783	6411784	G	C	snv	clinvar,clinvarBenign,commonSome,commonAll,overlapDiffClass,	0.0195687	SMPD1	+	5.13481e+09	NM_000543	-2260	-2294	utr5	long_loop	GAGGGCTGGCTAGGGTCCAGGCCGGGGGGGACGGGACAGA	GAGGGCTGGCTAGGGTCCAGGCCGCGGGGGACGGGACAGA	-6.2	-6.2	1	1	0	0
chr19:1010086-1010116	rs116247697	chr19	1010114	1010115	C	T	snv	commonSome,commonAll,	0.0195687	C19orf6	-	2.51043e+09	NM_001033026	-146	-413	utr3	bulge	AGGGGGTGGGGTTCCGCGGAAGGTTCTGGAGGGGTCTTGG	AGGGGATGGGGTTCCGCGGAAGGTTCTGGAGGGGTCTTGG	0.9	0.5	0	0	0	0
chr3:11598369-11598399	rs9881151	chr3	11598377	11598378	T	C	snv	commonSome,commonAll,overlapDiffClass,	0.0195687	VGLL4	-	2.20667e+08	NM_001128219	-158	-807	utr3	Others	CACAGAGTGGCTGCAGGCCTTTGAAAAGTGGAGGAAAGAA	CACAGAGTGGCTGCAGGCCTTTGAAGAGTGGAGGAAAGAA	-1.5	-1.5	0	0	0	0
chr15:99671475-99671505	rs5030695	chr15	99671491	99671492	A	G	snv	commonSome,rareSome,	0.0197684	SYNM	+	1.01177e+09	NM_145728	-2011	-4269	cds	PQs_7	CCGCCCTCACCAGAGAGGGGCAGGGTGGGCCGGGGAGCGT	CCGCCCTCACCAGAGAGGGGCGGGGTGGGCCGGGGAGCGT	-6.2	-6.3	0	0	1	1
chr19:3207788-3207818	rs145367559	chr19	3207816	3207817	G	A	snv	commonSome,rareSome,	0.0197684	NCLN	+	0.0117513	NM_020170	-1108	-1730	utr3	2-quartet	GACAGGGGCCCTCTCCCTCCCCGGCGGTGGTTGGAACACT	GACAGGGGCCCTCTCCCTCCCCGGCGGTGGTTGAAACACT	-2.2	-2.2	1	1	0	0
chr1:205242246-205242276	rs16855312	chr1	205242263	205242264	G	A	snv	commonSome,rareSome,	0.0199681	TMCC2	+	0.00021023	NM_014858	-175	-168	utr3	Others	TATTTATTTTGTAAGTGTATTCGTGTGGAGGAGGTTGTTG	TATTTATTTTGTAAGTGTATTCATGTGGAGGAGGTTGTTG	1.1	1.1	0	0	0	0
chr11:6497872-6497902	rs1802921	chr11	6497883	6497884	C	A	snv	commonSome,rareSome,	0.0199681	ARFIP2	-	1.29217e+09	NM_012402	0	-103	utr3	PQs_7	AGAAGGGGACTGGGACCAAAGGGGTGGGGATAATGGGGAG	AGAAGGGGACTGGGACCAAAGGTGTGGGGATAATGGGGAG	-0.9	0	2	2	1	0
chr16:66785476-66785506	rs575612827	chr16	66785504	66785505	G	C	snv	commonSome,rareSome,	0.0199681	DYNC1LI2	-	5.57466e+08	NM_006141	-1489	-4262	cds,utr5	2-quartet	GGCTGCAGTTGGCAAGATGGCGCCGGTGGGGGTGGAGAAG	GGCTGGAGTTGGCAAGATGGCGCCGGTGGGGGTGGAGAAG	-1.3	-0.5	0	0	0	0
chr3:39185087-39185117	rs62635819	chr3	39185091	39185092	T	C	snv	commonSome,rareSome,overlapDiffClass,	0.0199681	CSRNP1	-	0.0110636	NM_033027	-579	-1721	cds	2-quartet	GACTCTGACTTCGGTGGGGAGGAGGAGGAAGAGGAGGAAG	GACTCTGACTTCGGTGGGGAGGAGGAGGAGGAGGAGGAAG	0.5	0.5	1	1	0	0
chr14:64693045-64693075	rs870404	chr14	64693070	64693071	G	A	snv	clinvar,clinvarBenign,commonSome,commonAll,overlapDiffClass,	0.0201677	SYNE2	+	1.91857e+08	NM_015180	-31	-54	utr3	2-quartet	TAACTGTTTGGCCACGGCGGGGGTGGGGGCGGGGGGTTGG	TAACTGTTTGGCCACGGCGGGGGTGGGGGCAGGGGGTTGG	-1.5	-2.5	1	1	0	0
chr22:41924223-41924253	rs203315	chr22	41924231	41924232	A	G	snv	commonSome,rareSome,	0.0201677	POLR3H	-	4.33434e+09	NM_138338	-197	608	utr3	2-quartet	CCAGGTCCTGGTGAGTAAAGGGAGGTTGGGGAGGTGTGAG	CCAGGTCCTGGTGAGTAAAGGGAGGCTGGGGAGGTGTGAG	-1.5	-1.5	0	0	0	0
chr14:24631392-24631422	rs34348617	chr14	24631403	24631404	G	A	snv	commonSome,rareSome,	0.0203674	IRF9	+	0.000121768	NM_006084	-1415	-1459	cds	bulge	TCCGGAACTGGGTGGTGGAGCAAGTGGAGAGTGGGCAGTT	TCCGGAACTGGGTGGTAGAGCAAGTGGAGAGTGGGCAGTT	0.8	1.2	1	1	0	0
chr2:207007503-207007533	rs72944827	chr2	207007513	207007514	A	C	snv	clinvar,clinvarBenign,commonSome,rareSome,	0.0203674	NDUFS1	-	5.54478e+09	NM_005006	-2156	-1400	cds	2-quartet	AAAGATGTGGCAGCAATTGCAGGTGGCTTGGTGGATGCTG	AAAGATGTGGCAGCAATTGCAGGGGGCTTGGTGGATGCTG	-3	-3	0	0	0	0
chr8:145755232-145755262	rs60512843	chr8	145755241	145755242	C	T	snv	commonSome,rareSome,	0.0205671	ARHGAP39	-	0.00833004	NM_025251	-10	-648	utr3	long_loop	CCGGGGCCTGGCAGGCTCTCGGTGGGTGGGGTGGGGGCCC	CCGGGGCCTGGCAGGCTCTCGGTGAGTGGGGTGGGGGCCC	-3.7	-5.1	0	0	0	0
chr1:151171069-151171099	rs74571004	chr1	151171090	151171091	G	C	snv	commonSome,rareSome,	0.0207668	PIP5K1A	+	8.80282e+08	NM_003557	-2861	-3665	utr5	2-quartet	TTGGGCGATTAACAGGCCGTGGTTAGGAAGGACGGAGAAG	TTGGGCGATTAACAGGCCGTGGTTAGCAAGGACGGAGAAG	-1	-1	1	1	0	0
chr16:22297548-22297578	rs78878785	chr16	22297575	22297576	G	A	snv	commonSome,rareSome,overlapDiffClass,	0.0207668	EEF2K	+	0.00238	NM_013302	-360	-355	utr3	Others	TGGCTTGTGTTACATTTTGTGTGTGTGTGTGCGTGTTTTA	TGGCTTGTGTTACATTTTGTGTGTGTGTGTGCATGTTTTA	-0.3	-0.3	0	0	0	0
chr17:17396068-17396098	rs112340694	chr17	17396076	17396077	C	T	snv	commonSome,rareSome,	0.0207668	MED9	+	0.000533534	NM_018019	-177	-406	utr3	2-quartet	TGCCAGCTGACCTCGTTGGCAGGAGGGTTGGGTGGAGATG	TGCCAGCTGACCTTGTTGGCAGGAGGGTTGGGTGGAGATG	-2.7	-2.7	1	1	0	0
chr5:112203713-112203743	rs74570958	chr5	112203723	112203724	T	C	snv	commonSome,rareSome,	0.0207668	SRP19	+	2.83859e+07	NM_003135	-94	122	utr3	bulge	CTGTGGTAGGTCCTTTTGTGGGTGGGGGACAGGGGAGTCT	CTGTGGTAGGTCCTTCTGTGGGTGGGGGACAGGGGAGTCT	-0.4	-1.3	1	1	0	0
chr5:137804620-137804650	rs6914	chr5	137804634	137804635	T	C	snv	commonSome,commonAll,	0.0207668	EGR1	+	0.00130458	NM_001964	7	-118	utr3	2-quartet	GGGGGCAGGGAGTGATGATTTGGGGGAGGCTTTGGGAGCA	GGGGGCAGGGAGTGATGATCTGGGGGAGGCTTTGGGAGCA	-0.8	-0.8	0	0	0	0
chr6:36562171-36562201	rs17553386	chr6	36562174	36562175	G	C	snv	commonSome,commonAll,overlapDiffClass,	0.0207668	SRSF3	+	8.89125e+09	NM_003017	-578	-1976	utr5	2-quartet	AGAGAGTTGGTTGGTGTTGGGCCGGAGGAAAGCGGGAAGA	AGAGAGTTCGTTGGTGTTGGGCCGGAGGAAAGCGGGAAGA	-0.3	-0.3	0	0	0	0
chr12:1019093-1019123	rs78913352	chr12	1019103	1019104	G	A	snv	clinvar,clinvarBenign,commonSome,rareSome,	0.0209665	WNK1	+	0.00107113	NM_014823	104	-1324	utr3	2-quartet	AGAAAGTTCTGTTTCGGGAATAGTGAGGAGGGGGTGTTGT	AGAAAGTTCTGTTTCAGGAATAGTGAGGAGGGGGTGTTGT	-0.5	-0.5	0	0	0	0
chr3:24164262-24164292	rs72619908	chr3	24164267	24164268	C	G	snv	clinvar,clinvarBenign,commonSome,rareSome,	0.0211661	THRB	-	8.15284e+07	NM_000461	2	-1325	utr3	PQs_7	GTTTCTTTGTGTTGGGAGGGATTATTTGGGAGGGAAAAGG	GTTTCTTTGTGTTGGGAGGGATTATTTGCGAGGGAAAAGG	1.7	1.7	0	0	1	0
chr1:100549492-100549522	rs74102341	chr1	100549502	100549503	T	C	snv	commonSome,rareSome,	0.0213658	SASS6	-	8.93636e+09	NM_194292	10	-344	utr3	Others	TTCTGGAAAGAAGCCTCTTGGTGATTTTGGAAGGAGCTTT	TTCTGGAAAGAAGCCTCTTGGTGGTTTTGGAAGGAGCTTT	-1.3	-1.5	0	0	0	0
chr1:156712758-156712788	rs73002713	chr1	156712772	156712773	G	A	snv	commonSome,rareSome,	0.0215655	HDGF	-	5.76477e+07	NM_004494	398	-837	utr3	long_loop	CTCAAATGCGGGGTGGGGGCAGCACAGGAGGGCGGCCTCC	CTCAAATGCGGGGTGGGGGTAGCACAGGAGGGCGGCCTCC	-9.4	-3.6	0	0	0	0
chr11:83166341-83166371	rs78522917	chr11	83166356	83166357	C	T	snv	commonSome,commonAll,	0.0217652	DLG2	-	2.38478e+09	NM_001142702	-47	-115	utr3	2-quartet	CACCGAGCTGTAGCACAGGATGGGAGGGAGGTGGGAATAC	CACCGAGCTGTAGCACAGAATGGGAGGGAGGTGGGAATAC	-0.3	-0.3	0	0	0	0
chr3:138663823-138663853	rs115665190	chr3	138663842	138663843	G	A	snv	commonSome,rareSome,	0.0217652	FOXL2	-	0.00720359	NM_023067	-549	-732	utr3	PQs_7	CGGGGGTTGGGACCCAGCGGGAGCCGGGGCAGCCTGGCTC	CGGGGGTTGGGACCTAGCGGGAGCCGGGGCAGCCTGGCTC	-5.9	-5.6	1	1	1	1
chr5:150037758-150037788	rs140576087	chr5	150037763	150037764	G	A	snv	commonSome,commonAll,	0.0217652	SYNPO	+	8.73288e+08	NM_007286	-810	-963	utr3	bulge	ATATTAGGAAGTCGGGGGTGGGTGGTGGTGGTGGGCTAGT	ATATTAGGAAATCGGGGGTGGGTGGTGGTGGTGGGCTAGT	3	1.1	0	0	0	0
chr21:44836365-44836395	rs11908874	chr21	44836369	44836370	G	A	snv	commonSome,rareSome,	0.0221645	SIK1	-	123672	NM_173354	61	-1947	utr3	PQs_7	CGTGTCTGGGGGCGGGGGCAGGAGGGGAGCGGGGTGGAGG	CGTGTCTGGGGGCGGGGGCAGGAGGGGAGTGGGGTGGAGG	0.6	0.6	0	0	1	1
chr9:113151815-113151845	rs73655337	chr9	113151821	113151822	C	T	snv	commonSome,rareSome,	0.0221645	SVEP1	-	0.00408117	NM_153366	-878	-1074	cds	2-quartet	TGCCAGGAGAACAGACAGTGGAGTGGAGGGGTGGCAATAT	TGCCAGGAGAACAGACAGTGGAGTGGAAGGGTGGCAATAT	-1.4	-1.4	1	1	0	0
chr4:78078616-78078646	rs4150048	chr4	78078624	78078625	A	C	snv	commonSome,commonAll,	0.0223642	CCNG2	+	0.000899923	NM_004354	-1090	-5160	utr5	bulge	CGTGCGGACCGCGAGGCCGCGGGCGGGTGGAGGCGCGTCT	CGTGCGGACCGCGCGGCCGCGGGCGGGTGGAGGCGCGTCT	-7.3	-8.2	1	1	0	0
chr5:172742921-172742951	rs6861507	chr5	172742937	172742938	G	A	snv	commonSome,commonAll,	0.0225639	STC2	-	2.33526e+09	NM_003714	-251	-447	utr3	bulge	TTCATGATCCATGCCGGCGGTTGGGTGGGGAGGGGAATCA	TTCATGATCCATGCCGGTGGTTGGGTGGGGAGGGGAATCA	-0.4	-0.4	0	0	0	0
chr1:160186675-160186705	rs74125505	chr1	160186696	160186697	G	A	snv	commonSome,rareSome,	0.0227636	DCAF8	-	4.56144e+06	NM_015726	59	-205	utr3	PQs_7	AGGTGAGGGAGGCTGGGAAGAGGTGGGAGGAGGGGCAGAA	AGGTGAGGGAGGTTGGGAAGAGGTGGGAGGAGGGGCAGAA	1	3	0	0	1	1
chr17:75211182-75211212	rs3744064	chr17	75211207	75211208	C	T	snv	commonSome,commonAll,	0.0227636	SEC14L1	+	0.000355508	NM_001204410	754	-1946	utr3	bulge	GTGTGCATGACGGTGGGGGTGCTGGGGGGACGGGGTGAGT	GTGTGCATGACGGTGGGGGTGCTGGGGGGATGGGGTGAGT	0.7	0.7	0	0	0	0
chr8:33406021-33406051	rs78523626	chr8	33406043	33406044	G	A	snv	commonSome,rareSome,	0.0227636	RNF122	-	0.0121143	NM_024787	-293	-719	utr3	Others	ATGCTGGTGGCCTCACCCATCAAGACCACTGTCTCCTGGT	ATGCTGGTGGCTTCACCCATCAAGACCACTGTCTCCTGGT	-3.5	-2.8	1	1	0	0
chr20:31025400-31025430	rs75599685	chr20	31025418	31025419	G	A	snv	clinvar,clinvarBenign,commonSome,rareSome,overlapDiffClass,	0.0231629	ASXL1	+	8.2911e+09	NM_015338	-94	-763	utr3	bulge	GATGTGGCACGGAGTGGGGTTGCGGGGGGTGGGGGGACTG	GATGTGGCACGGAGTGGGGTTGCAGGGGGTGGGGGGACTG	-1.5	-1.5	1	1	0	0
chr11:83166341-83166371	rs79177794	chr11	83166360	83166361	T	C	snv	commonSome,rareSome,	0.0233626	DLG2	-	2.38478e+09	NM_001142702	-47	-115	utr3	2-quartet	CACCGAGCTGTAGCACAGGATGGGAGGGAGGTGGGAATAC	CACCGAGCTGTAGCGCAGGATGGGAGGGAGGTGGGAATAC	-0.3	-0.4	0	0	0	0
chr6:163988413-163988443	rs58159136	chr6	163988420	163988421	G	A	snv	commonSome,rareSome,	0.0233626	QKI	+	0.0100079	NM_206853	-3	333	utr3	Others	ATAAATTAGAGCGTCAATTCCCTTTTATTCTTACATTCTC	ATAAATTAGAGCATCAATTCCCTTTTATTCTTACATTCTC	0.9	0.1	0	0	0	0
chr7:91829749-91829779	rs28502064	chr7	91829777	91829778	C	T	snv	clinvar,clinvarBenign,commonSome,rareSome,	0.0233626	KRIT1	-	0.00351703	NM_194454	-155	-328	utr3	2-quartet	AGGTGGGAGATCGCTTAAACCCAGGAGGTGGAGGTTGTAG	AGGTGAGAGATCGCTTAAACCCAGGAGGTGGAGGTTGTAG	-1.1	-0.9	1	1	0	0
chr10:125768164-125768194	rs80221060	chr10	125768179	125768180	G	A	snv	commonSome,rareSome,	0.0235623	CHST15	-	0.0103979	NM_015892	-258	-920	utr3	2-quartet	GTGAGACAGACCAGGCTTCGGGGGTAGGAGGATCTGCAGT	GTGAGACAGACCAGGCTTTGGGGGTAGGAGGATCTGCAGT	0.4	-0.5	1	1	0	0
chr12:3392534-3392564	rs113502124	chr12	3392552	3392553	C	G	snv	commonSome,commonAll,overlapDiffClass,	0.0235623	TSPAN9	+	0.00216812	NM_006675	0	-3134	utr3	bulge	AGACGACAGGGTGGGCTGGGGTGCGCTCCGGAGGAACCCC	AGACGACAGGGTGGGCTGGGGTGGGCTCCGGAGGAACCCC	-5.4	-5.8	1	1	0	1
chr2:54785834-54785864	rs138719883	chr2	54785844	54785845	T	C	snv	commonSome,rareSome,	0.0235623	SPTBN1	+	0.00010186	NM_178313	-6691	-8717	utr5	2-quartet	GAGGCTGCTGCGTGTTGGATGGGAGTGGGAGGGGGCTGGA	GAGGCTGCTGCGTGTCGGATGGGAGTGGGAGGGGGCTGGA	0.4	0.4	0	0	0	0
chr19:19223400-19223430	rs80185535	chr19	19223409	19223410	G	A	snv	commonSome,rareSome,	0.023762	SLC25A42	+	0.00222467	NM_178526	-207	-246	utr3	bulge	GGCTAGGCAGGAGAGACAAGGGGTAGGTGGGAGGGTCCCC	GGCTAGGCAGGAGAAACAAGGGGTAGGTGGGAGGGTCCCC	-1.8	-1.8	1	1	0	0
chr1:151377225-151377255	rs6667714	chr1	151377247	151377248	C	T	snv	refIsMinor,commonSome,rareSome,overlapDiffClass,	0.0241613	POGZ	-	6.75896e+08	NM_207171	-100	-1372	utr3	long_loop	GGTGTGGAGTGAGGGTGGGAACATGTGAGGGAGGGTAAAG	GGTGTGGAGTGGGGGTGGGAACATGTGAGGGAGGGTAAAG	-0.2	-0.2	1	1	0	0
chr19:13246581-13246611	rs113254389	chr19	13246605	13246606	C	T	snv	commonSome,rareSome,	0.0241613	NACC1	+	0.00276906	NM_052876	-1372	-3710	cds	2-quartet	TGGGACAGTGGCCAGAAGGAGGCTGGGGGCGGCGGCAATG	TGGGACAGTGGCCAGAAGGAGGCTGGGGGTGGCGGCAATG	-1.7	-2.6	1	1	0	0
chr2:202028869-202028899	rs78196930	chr2	202028897	202028898	G	C	snv	commonSome,commonAll,	0.024361	CFLAR	+	0.0054463	NM_001202518	262	-113	utr3	2-quartet	GTATTCCCAGTTACTTGGGAGGCTGAGGTGGGAGGATCTT	GTATTCCCAGTTACTTGGGAGGCTGAGGTGGGACGATCTT	-2.9	-2.9	0	0	0	0
chr22:47570096-47570126	rs114975778	chr22	47570111	47570112	G	A	snv	commonSome,commonAll,	0.024361	TBC1D22A	+	0.00297801	NM_014346	619	383	utr3	long_loop	TGGCAGACGGGCAGGGGGTCGCGTCCCTGTCATCAAAGCC	TGGCAGACGGGCAGGGGGTCACGTCCCTGTCATCAAAGCC	-3.6	-3.6	0	0	0	0
chr19:12859047-12859077	rs8177500	chr19	12859073	12859074	G	A	snv	commonSome,commonAll,	0.0245607	ASNA1	+	2.09165e+08	NM_004317	52	-40	utr3	long_loop	GAGGGGTCCATTCCCCCTGGTGGGGCTGGTGGGGAGCTGT	GAGGGGTCCATTCCCCCTGGTGGGGCTGGTGAGGAGCTGT	-3.7	-3.7	0	0	0	0
chr12:6787430-6787460	rs61733173	chr12	6787447	6787448	G	T	snv	commonSome,rareSome,	0.0247604	ZNF384	-	9.80274e+08	NM_133476	-1233	-1956	cds	2-quartet	TAACCGAGGAAGGAGGCGGAGGTGGTGGTGGAGGTGGCAG	TAACCGAGGAAGGAGGAGGAGGTGGTGGTGGAGGTGGCAG	-0.3	0.7	1	1	0	0
chr17:80321376-80321406	rs111785016	chr17	80321379	80321380	C	T	snv	commonSome,commonAll,	0.0247604	TEX19	+	0.00191775	NM_207459	644	-220	utr3	Others	ACTTGTGCCTATTTCACCTTGGCCATGGGGAGGGACATTG	ACTTGTGCTTATTTCACCTTGGCCATGGGGAGGGACATTG	-6	-2.5	1	1	0	0
chr1:150208171-150208201	rs75883383	chr1	150208189	150208190	A	G	snv	commonSome,rareSome,	0.0249601	ANP32E	-	6.87634e+08	NM_030920	-955	-1136	utr5	long_loop	TTTGGGTTGGGGGTATTGGGGAAGGCAGGAAAGGGAAAAG	TTTGGGTTGGGGGTACTGGGGAAGGCAGGAAAGGGAAAAG	2.9	1.4	0	0	0	0
chr1:150208171-150208201	rs112495199	chr1	150208198	150208199	A	G	snv	commonSome,rareSome,	0.0249601	ANP32E	-	6.87634e+08	NM_030920	-955	-1136	utr5	long_loop	TTTGGGTTGGGGGTATTGGGGAAGGCAGGAAAGGGAAAAG	TTTGGGCTGGGGGTATTGGGGAAGGCAGGAAAGGGAAAAG	2.9	2.4	0	0	0	0
chr1:213070536-213070566	rs115914498	chr1	213070551	213070552	T	A	snv	commonSome,rareSome,overlapDiffClass,	0.0249601	FLVCR1	+	0.00220763	NM_014053	669	-2116	utr3	Others	TAAATAAATAAATAAATAAATAAAACCTGAGGTTGAGCAC	TAAATAAATAAATAAATAAAAAAAACCTGAGGTTGAGCAC	-0.8	-0.8	1	1	0	0
chr11:6502699-6502729	rs74055808	chr11	6502711	6502712	A	G	snv	commonSome,rareSome,	0.0249601	FXC1	+	0.00703341	NM_012192	-460	-2768	utr5	G_40	CGGCACCGAGAAGCTGAAACGGAAGTGGCGTACGGCATGC	CGGCACCGAGAAGCTGAGACGGAAGTGGCGTACGGCATGC	-4.1	-4.1	0	0	0	0
chr20:43353580-43353610	rs13339902	chr20	43353600	43353601	G	A	snv	commonSome,rareSome,	0.0249601	WISP2	+	2.56384e+08	NM_003881	-455	-730	cds	bulge	CCTGAGTGGGTGTGCGGCCAAGGAGGGGGACTGGGGACCC	CCTGAGTGGGTGTGCGGCCAAGGAGAGGGACTGGGGACCC	-0.8	-0.9	2	2	0	0
chr3:38528134-38528164	rs6790964	chr3	38528138	38528139	G	A	snv	clinvar,clinvarBenign,commonSome,rareSome,overlapDiffClass,	0.0249601	ACVR2B	+	0.00611373	NM_001106	814	3209	utr3	long_loop	AATGGGAGGGGCTGTTCCATGCAGGGTGGGAGGGGACCAA	AATGGGAGGAGCTGTTCCATGCAGGGTGGGAGGGGACCAA	-1.1	-1.1	1	1	0	0
chr18:29522914-29522944	rs75684315	chr18	29522932	29522933	G	A	snv	commonSome,commonAll,	0.0251597	TRAPPC8	-	0.000714836	NM_014939	-4514	-5286	utr5	2-quartet	AGCGCTGAGAAGCGGCGGTGACGGGAAGGGGGGGGTCAGT	AGCGCTGAGAAGCGGTGGTGACGGGAAGGGGGGGGTCAGT	-3.4	-3.4	0	0	0	0
chr17:78075520-78075550	rs77514632	chr17	78075543	78075544	G	A	snv	clinvar,clinvarBenign,commonSome,commonAll,	0.0253594	GAA	+	0.0038475	NM_000152	-3542	-3557	utr5	bulge	TGAGGTTGTCGCCGGGGCCGCGGGTGGAGGTCGGGGATGA	TGAGGTTGTCGCCGGGGCCGCGGGTGGAAGTCGGGGATGA	-4.2	-3.7	0	0	0	0
chr1:24795844-24795874	rs75181393	chr1	24795863	24795864	T	G	snv	commonSome,rareSome,	0.0257588	NIPAL3	+	0.000937314	NM_020448	91	-3572	utr3	2-quartet	TTGGAAATTTCAAATGATGAGGGTTGGGGGATGGAAGCAT	TTGGAAATTTCAAATGATGAGGGTGGGGGGATGGAAGCAT	-0.2	-0.2	0	0	0	0
chr12:51213943-51213973	rs567724058	chr12	51213956	51213957	A	G	snv	commonSome,rareSome,overlapDiffClass,	0.0257588	ATF1	+	1.797e+09	NM_005171	182	-12	utr3	Others	CTTTTTTTAGTTATATATATGTGTGTGTGTGTGTGTAATT	CTTTTTTTAGTTATATATGTGTGTGTGTGTGTGTGTAATT	2	2	0	0	0	0
chr13:52378255-52378285	rs561961551	chr13	52378284	52378285	C	T	snv	commonSome,rareSome,	0.0257588	DHRS12	-	0.00585892	NM_024705	-1704	-1895	utr5	bulge	CCGCGCCGGGAGCGCGGTGGGGCTAGGCGTGGGGCGCTCC	CCGCACCGGGAGCGCGGTGGGGCTAGGCGTGGGGCGCTCC	-8.6	-6.9	0	0	0	0
chr17:292615-292645	rs200745983	chr17	292618	292619	C	T	snv	commonSome,rareSome,overlapDiffClass,	0.0257588	FAM101B	-	0.00190877	NM_182705	63	-242	utr3	2-quartet	GGAAAGCAGCAGCAGTCTGGGATAGGGAGGGGGGAGGAGA	GGAAAGCAGCAGCAGTCTGGGATAGGGAGGAGGGAGGAGA	0	0	0	0	0	0
chr12:120125126-120125156	rs60243987	chr12	120125146	120125147	G	A	snv	commonSome,rareSome,overlapDiffClass,	0.0259585	CIT	-	4.76772e+09	NM_001206999	637	-1508	utr3	PQs_7	CACTCCTGGGTCTCGGGGTCGGGGAGGGGACGGGGGCACC	CACTCCTGGGTCTTGGGGTCGGGGAGGGGACGGGGGCACC	-1.4	-1.6	0	0	1	1
chr17:37903234-37903264	rs12942328	chr17	37903240	37903241	G	A	snv	commonSome,rareSome,	0.0259585	GRB7	+	0.00039274	NM_005310	-217	-252	utr3	long_loop	CGCGGCCACAGGGGACGGGATGAGGAGCGGGAGGGTTCCG	CGCGGCCACAGAGGACGGGATGAGGAGCGGGAGGGTTCCG	-4.5	-4.5	0	0	0	0
chr2:174090901-174090931	rs60607753	chr2	174090927	174090928	G	C	snv	commonSome,commonAll,	0.0259585	ZAK	+	3.18425e+09	NM_133646	-227	-923	utr3	2-quartet	ATTAAAAATCAAGGAATTAGGGGTCGGGGGAGGGTTTAGG	ATTAAAAATCAAGGAATTAGGGGTCGGGGGACGGTTTAGG	1	0	0	0	0	0
chr7:2274484-2274514	rs11547271	chr7	2274489	2274490	C	T	snv	commonSome,rareSome,	0.0261581	FTSJ2	-	0.00150553	NM_013393	-487	-536	utr3	2-quartet	TTATCAAGAGAAAGAGGTGAGGATGGAAGGATGGAGAAAA	TTATCAAGAGAAAGAGGTGAGGATGGAAAGATGGAGAAAA	1.2	1.2	0	0	0	0
chr19:14606854-14606884	rs187836331	chr19	14606856	14606857	C	T	snv	commonSome,rareSome,overlapDiffClass,	0.0265575	GIPC1	-	0.000548029	NM_005716	-1404	-1814	utr5	2-quartet	AGCGGCGGCGGCGGCGGCGGCGGCGGCGGCGGCGGAGCAG	AGCGGCGGCGGCGGCGGCGGCGGCGGCGGCGACGGAGCAG	-22.6	-21.5	0	0	0	0
chr11:65418044-65418074	rs76089059	chr11	65418047	65418048	G	A	snv	commonSome,rareSome,	0.0267572	SIPA1	+	0.00197529	NM_006747	-200	-297	cds	2-quartet	GAGAAGGCGGACAGGGCGGCCCTGGAGGAGGAGGTGCGGA	GAGAAGGCAGACAGGGCGGCCCTGGAGGAGGAGGTGCGGA	-2.9	-2.9	1	1	0	0
chr18:3450202-3450232	rs7233448	chr18	3450203	3450204	A	T	snv	commonSome,rareSome,	0.0267572	TGIF1	+	0.000138338	NM_003244	-1168	-1456	utr5	bulge	AGGAGCAGGGAACAAAGGAGCGGAGAGGGGAGGGGAGAGA	AGGAGCTGGGAACAAAGGAGCGGAGAGGGGAGGGGAGAGA	1.9	-0.2	1	1	0	0
chr3:38022890-38022920	rs112149111	chr3	38022900	38022901	C	T	snv	commonSome,rareSome,	0.0267572	CTDSPL	+	0.00100709	NM_001008392	119	339	utr3	bulge	CGTGTGTGTGTGTGGCGGGGGGTGCTGAGGGAGGGGAGTG	CGTGTGTGTGTGTGGTGGGGGGTGCTGAGGGAGGGGAGTG	1	1.7	0	0	0	0
chr9:132572610-132572640	rs1220509	chr9	132572628	132572629	G	T	snv	refIsMinor,commonSome,commonAll,overlapDiffClass,	0.0267572	TOR1B	+	5.30315e+09	NM_014506	-303	-899	utr3	bulge	GAGCTGACCTGTGTGTGTGTGTGTGGGGGGGTGGGGCCTT	GAGCTGACCTGTGTGTGTGTGTGGGGGGGGGTGGGGCCTT	0.6	0.6	1	1	0	0
chr1:20987847-20987877	rs537816	chr1	20987872	20987873	C	G	snv	refIsMinor,clinvar,clinvarBenign,commonSome,rareSome,	0.0269569	DDOST	-	3.78232e+09	NM_005216	-1440	-1867	cds	2-quartet	GGTGTGCACGTGCTGGGTCCTTCGGCAGGAGGAGGAAGAT	GGTGTGCAGGTGCTGGGTCCTTCGGCAGGAGGAGGAAGAT	-1.4	-1.4	0	0	0	0
chr17:7808426-7808456	rs118079592	chr17	7808436	7808437	G	A	snv	commonSome,rareSome,	0.0269569	CHD3	+	0.000336105	NM_001005271	-1981	-2483	cds	2-quartet	CCAGTCAGAGTACTCGGTGGGTTCAGAGGAGGAGGATGAA	CCAGTCAGAGTACTCAGTGGGTTCAGAGGAGGAGGATGAA	0.1	-0.8	0	0	0	0
chr11:120958798-120958828	rs7109612	chr11	120958800	120958801	G	A	snv	commonSome,rareSome,	0.0271565	TBCEL	+	0.000128946	NM_001130047	133	-202	utr3	bulge	GGTGTGTGTGGGGAATGAAGTTGGGGGATGTGGGGGAAGA	GGTGTGTATGGGGAATGAAGTTGGGGGATGTGGGGGAAGA	1.7	1.7	0	0	0	0
chr19:10754710-10754740	rs2288903	chr19	10754734	10754735	G	T	snv	commonSome,rareSome,	0.0271565	SLC44A2	+	0.00301362	NM_001145056	76	-470	utr3	PQs_7	GGGAAGGAGGGAAAGGGAGGGAGAGTTTTGCGGGGGTTGG	GGGAAGGAGGGAAAGGGAGGGAGAGTTTTTCGGGGGTTGG	2.4	1.2	0	0	1	1
chr22:18573523-18573553	rs114075265	chr22	18573541	18573542	G	C	snv	clinvar,clinvarBenign,commonSome,rareSome,	0.0271565	PEX26	+	0.000543843	NM_017929	1303	-207	utr3	PQs_7	CTCTTCTGTGGTGGGATGGGAGGGTGGGGGAGAGGGGTGG	CTCTTCTGTGGTGGGATGGGAGGCTGGGGGAGAGGGGTGG	1.2	1.2	0	0	1	1
chr8:29194157-29194187	rs41277859	chr8	29194178	29194179	G	A	snv	commonSome,rareSome,	0.0271565	DUSP4	-	1.62655e+08	NM_001394	62	-3557	utr3	bulge	CAACCAGCTTTACTAAAGGGGGAGGAAGGGAGGGCAAAGG	CAACCAGCTTTATTAAAGGGGGAGGAAGGGAGGGCAAAGG	-0.3	0.7	0	0	0	0
chr22:38615638-38615668	rs116650853	chr22	38615653	38615654	C	T	snv	commonSome,rareSome,overlapDiffClass,	0.0279553	TMEM184B	-	0.00794526	NM_012264	-76	-286	utr3	bulge	TTTGCGTGGAGGGTGGGGGGAGCTCAGTGGCAGGGAATCA	TTTGCGTGGAGGGTGGGGAGAGCTCAGTGGCAGGGAATCA	1	1	0	0	0	0
chr1:117118806-117118836	rs76203894	chr1	117118815	117118816	C	G	snv	commonSome,commonAll,	0.028155	IGSF3	-	9.55656e+08	NM_001007237	109	-1757	utr3	2-quartet	ACACTAAGTTTGGTGGGACAGTGAGGGGTGGGAGGGGGGT	ACACTAAGTTTGGTGGGACAGTGACGGGTGGGAGGGGGGT	-0.5	-0.5	1	1	1	0
chr10:30601449-30601479	rs11007977	chr10	30601467	30601468	T	C	snv	commonSome,commonAll,	0.028155	MTPAP	-	0.000122048	NM_018109	547	296	utr3	Others	TCTGTCGCCCAGGCTAGAGTGCAGTGGCGCAATCTCGGCT	TCTGTCGCCCAGGCTGGAGTGCAGTGGCGCAATCTCGGCT	-4	-3.2	0	0	0	0
chr14:51080024-51080054	rs35044504	chr14	51080050	51080051	C	T	snv	clinvar,clinvarBenign,commonSome,rareSome,	0.0283546	ATL1	+	0.0136334	NM_181598	-1604	-1653	cds	Others	TTTCATATGGAGCCGATGGTGGTGCCAAATTCTTGGAAAA	TTTCATATGGAGCCGATGGTGGTGCCAAATTTTTGGAAAA	-1.5	-1.5	0	0	0	0
chr6:157713750-157713780	rs112900641	chr6	157713756	157713757	C	T	snv	commonSome,rareSome,	0.0283546	TMEM242	-	0.000934922	NM_018452	-1003	-204	utr3	G_40	CACAGGAGAGTATGTGTGTGCGTGCTGGGGGAGGGTAAAG	CACAGGAGAGTATGTGTGTGCGTGCTGAGGGAGGGTAAAG	-1.2	-1.2	0	0	0	0
chr2:26613729-26613759	rs76334262	chr2	26613734	26613735	G	C	snv	commonSome,rareSome,	0.0285543	EPT1	+	8.40524e+09	NM_033505	0	-100	utr3	Others	AATTAAACTGGATAAAATGTTAATTGGGGGTAGGGAAAAA	AATTAAACTGCATAAAATGTTAATTGGGGGTAGGGAAAAA	-0.5	-0.5	1	1	0	0
chr4:123747917-123747947	rs308400	chr4	123747941	123747942	G	C	snv	commonSome,rareSome,overlapDiffClass,	0.0285543	FGF2	+	0.000245257	NM_002006	-1272	-929	cds,utr5	long_loop	AACTGGGGGCGCGGGAGGCTGGTGGGTGTGGGGGGTGGAG	AACTGGGGGCGCGGGAGGCTGGTGGGTGTCGGGGGTGGAG	0.2	0.2	0	0	0	0
chr7:1580034-1580064	rs181353243	chr7	1580049	1580050	G	A	snv	commonSome,commonAll,overlapDiffClass,	0.0285543	MAFK	+	7.05948e+09	NM_002360	-1874	-2592	utr3	PQs_7	GGTGGCGGGCGGCGGGCGGCGGGCAGGCGGGTGGGGGCAC	GGTGGCGGGCGGCGGGCGGCAGGCAGGCGGGTGGGGGCAC	-2	-1.7	0	0	1	0
chr13:79911333-79911363	rs35724140	chr13	79911335	79911336	T	G	snv	commonSome,rareSome,overlapDiffClass,	0.028754	RBM26	-	0.00467927	NM_022118	-438	-581	cds	bulge	ATGGCCGAGGCAGGGGGCGAGGGCGAGGGCGAGGTGTGCC	ATGGCCGAGGCAGGGGGCGAGGGCGAGGGCGCGGTGTGCC	-1.3	-3.3	0	0	0	0
chr5:36241677-36241707	rs189482969	chr5	36241690	36241691	C	A	snv	clinvar,clinvarBenign,commonSome,rareSome,overlapDiffClass,	0.0291534	NADKD1	-	0.00106008	NM_001085411	-1431	-1398	cds	2-quartet	GGCGGCTTCCGCCCCTCCCGGGTGGTGGTGGTGGCCAAAA	GGCGGCTTCCGCCCCTCCCGTGTGGTGGTGGTGGCCAAAA	-6.2	-6.2	0	0	0	0
chr19:2273135-2273165	rs13140	chr19	2273145	2273146	C	T	snv	commonSome,rareSome,overlapDiffClass,	0.029353	OAZ1	+	8.17829e+08	NM_004152	-127	-57	utr3	2-quartet	GGCCCCTGGGGCCACCCCTTGTCAGCCGGGTGGGTAGGAA	GGCCCCTGGGGCCACTCCTTGTCAGCCGGGTGGGTAGGAA	-4.9	-4.9	0	0	0	0
chr6:38121432-38121462	rs77453856	chr6	38121449	38121450	G	C	snv	commonSome,rareSome,	0.029353	ZFAND3	+	0.000152424	NM_021943	-730	-919	utr3	PQs_7	ACTGCGCACGCCAGGTGGGGAAGGGTGGGGGTGGGCCTGG	ACTGCGCACGCCAGGTGGGGAACGGTGGGGGTGGGCCTGG	-8.5	-8.5	0	0	1	0
chr16:20870834-20870864	rs79514157	chr16	20870836	20870837	C	T	snv	commonSome,commonAll,	0.0295527	DCUN1D3	-	0.000366061	NM_173475	-24	-1399	utr3	long_loop	TTTTTTGGTAGGGGAGGGCATAGAGCAGGGCGGGGGGATG	TTTTTTGGTAGGGGAGGGCATAGAGCAGGGCAGGGGGATG	0.1	0.1	0	0	0	0
chr11:111955219-111955249	rs7123075	chr11	111955247	111955248	G	T	snv	commonSome,rareSome,	0.0299521	C11orf57	+	0.0116634	NM_001082969	-19	137	utr3	2-quartet	ATTTTTATTTTTGGGATTAGTGGGGGTCTAAAGGGAGAAG	ATTTTTATTTTTGGGATTAGTGGGGGTCTAAAGTGAGAAG	0.5	0.5	0	0	0	0
chr10:11962925-11962955	rs74119905	chr10	11962950	11962951	G	A	snv	commonSome,rareSome,	0.0301518	UPF2	-	0.000163919	NM_015542	176	-886	utr3	2-quartet	AGAAGAAACGGGTTGTGATGGTAATGGTGTGGGGGAAATG	AGAAGAAATGGGTTGTGATGGTAATGGTGTGGGGGAAATG	0.8	1.8	0	0	0	0
chr10:114576714-114576744	rs3740145	chr10	114576735	114576736	T	C	snv	commonSome,rareSome,	0.0307508	VTI1A	+	0.0032662	NM_145206	-1175	-1737	utr3	2-quartet	AAGCTGCAGCCTTTACTTCGGAGGGATGGTGTGGGATTTT	AAGCTGCAGCCTTTACTTCGGAGGGACGGTGTGGGATTTT	-0.8	0.7	0	0	0	0
chr8:145057897-145057927	rs11984791	chr8	145057913	145057914	G	A	snv	commonSome,rareSome,	0.0307508	PARP10	-	0.00279431	NM_032789	-1425	-1504	cds	2-quartet	GGGAGGACTGGCTGCCTCGGGAGCTGGAGGAGGAAGGGCC	GGGAGGACTGGCTGCCTTGGGAGCTGGAGGAGGAAGGGCC	-3.3	-1.6	1	1	0	0
chr9:5833049-5833079	rs10815288	chr9	5833075	5833076	C	G	snv	commonSome,rareSome,overlapDiffClass,	0.0315495	ERMP1	-	0.000464684	NM_024896	-2879	-5291	utr5	PQs_7	GCGGCCGGGGCTGTCGCGGGTTGGGGCGGTTGGGCTGGCA	GCGGCCGCGGCTGTCGCGGGTTGGGGCGGTTGGGCTGGCA	-2.8	-6.1	0	0	1	0
chr9:139007616-139007646	rs111892286	chr9	139007638	139007639	G	A	snv	commonSome,rareSome,	0.0319489	C9orf69	-	0.00402648	NM_152833	78	-1159	utr3	long_loop	TCAGCAGGCTCCCAGCTCAGGGGCTGGCCTGGGGGGAACC	TCAGCAGGCTCTCAGCTCAGGGGCTGGCCTGGGGGGAACC	-5.5	-5.5	1	1	0	0
chr12:105153231-105153261	rs3782418	chr12	105153251	105153252	T	G	snv	commonSome,rareSome,	0.0323482	CHST11	+	1.54715e+09	NM_018413	17	1371	utr3	PQs_7	TAATAGTTTTAATAATAGGGGAGGGTGGGATGGGGTGTGG	TAATAGTTTTAATAATAGGGGAGGGGGGGATGGGGTGTGG	1.1	1.1	0	0	1	1
chr1:154932102-154932132	rs538179584	chr1	154932109	154932110	A	C	snv	commonSome,commonAll,	0.0327476	PYGO2	-	0.000148904	NM_138300	-919	-2578	cds	2-quartet	GTACCCCCAGGCTACAGCACTGGAGGTGGAGGGGGCCCCC	GTACCCCCAGGCTACAGCACTGGAGGGGGAGGGGGCCCCC	-5.5	-4.7	0	0	0	0
chr3:113163193-113163223	rs73239130	chr3	113163210	113163211	G	A	snv	commonSome,commonAll,	0.0329473	SPICE1	-	0.0132434	NM_144718	314	280	utr3	Others	TTATAGGTTCATGCCACCACGCCCAGCTAATTTGTGTATT	TTATAGGTTCATGCCATCACGCCCAGCTAATTTGTGTATT	0.6	1	0	0	0	0
chr1:182353054-182353084	rs16828882	chr1	182353074	182353075	T	C	snv	clinvar,clinvarBenign,commonSome,commonAll,	0.0333466	GLUL	-	3.21535e+09	NM_001033056	186	-1004	utr3	bulge	AAAAGTGGGAATTAGGAGAGAAGGTAGGGGTTGGGAATCA	AAAAGTGGGAATTGGGAGAGAAGGTAGGGGTTGGGAATCA	1	1	0	0	0	0
chr22:41831369-41831399	rs80048472	chr22	41831378	41831379	T	C	snv	commonSome,rareSome,overlapDiffClass,	0.0339457	TOB2	-	2.9681e+08	NM_016272	-137	-1850	utr3	bulge	CTTATTTATATGTGAGGCTGGGGAATGGGCTGGGGGTATT	CTTATTTATATGTGAGGCTGGGGAGTGGGCTGGGGGTATT	1.6	1.3	0	0	0	0
chr9:138380349-138380379	rs111701898	chr9	138380378	138380379	C	T	snv	commonSome,rareSome,	0.0339457	PPP1R26	+	0.00107338	NM_014811	-187	-339	utr3	2-quartet	TTGGTTGATTGCTGGTGAGAATGGCCGGCGGTGGCTGCAG	TTGGTTGATTGCTGGTGAGAATGGCCGGCGGTGGTTGCAG	-3	-3	0	0	0	0
chr2:136743111-136743141	rs6752967	chr2	136743137	136743138	A	G	snv	commonSome,rareSome,	0.0345447	DARS	-	218869	NM_001349	-1665	-2194	utr5	long_loop	CCCAGGGTCGGGAGGGCGGAGACTGGGAGGGAGGGAGAAG	CCCAGGGCCGGGAGGGCGGAGACTGGGAGGGAGGGAGAAG	-3	-5.2	1	1	0	0
chr1:46598266-46598296	rs114819755	chr1	46598281	46598282	A	G	snv	commonSome,commonAll,	0.0349441	PIK3R3	-	0.00862019	NM_003629	-2094	-5537	utr5	bulge	GGCAGAGCTTGAGGGCAGTTGGTGCGGTCGGGTTGGTTCT	GGCAGAGCTTGAGGGCAGCTGGTGCGGTCGGGTTGGTTCT	-0.9	-1.8	0	0	0	0
chr3:52873007-52873037	rs2336156	chr3	52873016	52873017	G	A	snv	refIsMinor,commonSome,rareSome,	0.0353435	TMEM110	-	0.00278015	NM_198563	253	883	utr3	2-quartet	AAACAGCAAGGTAGGGGCACTGCTTGGTGGTTTGTCAAGC	AAACAGCAAGGTAGGGGCACTGCTCGGTGGTTTGTCAAGC	-6.2	-0.6	1	1	0	0
chr4:48559104-48559134	rs74695987	chr4	48559111	48559112	C	T	snv	commonSome,rareSome,	0.0355431	FRYL	-	1.65438e+07	NM_015030	-4944	-5798	cds	2-quartet	TAGTATGGCGATGAACTGGCCTGGTCGGAGGTGGAGAATG	TAGTATGGCGATGAACTGGCCTGGTCAGAGGTGGAGAATG	-0.4	-2.1	1	1	0	0
chr5:43290414-43290444	rs73096660	chr5	43290416	43290417	T	C	snv	commonSome,commonAll,	0.0355431	HMGCS1	-	3.06708e+09	NM_002130	-22	-893	utr3	2-quartet	CAACAGTGAGATGTTATTGGAGGTGTGGATGAGGGAGTTT	CAACAGTGAGATGTTATTGGAGGTGTGGATGGGGGAGTTT	-0.7	-0.7	0	0	0	0
chr20:16360212-16360242	rs2236145	chr20	16360218	16360219	C	T	snv	commonSome,commonAll,	0.0363419	KIF16B	-	0.0101807	NM_024704	-1551	-2599	cds	2-quartet	CTCCTGCGGGTGAAGGAGGCTCGTGCCGGAGGGGATGAAG	CTCCTGCGGGTGAAGGAGGCTCGTGCCAGAGGGGATGAAG	-4.2	-2.4	0	0	0	0
chr3:183911688-183911718	rs59606796	chr3	183911695	183911696	G	T	snv	commonSome,rareSome,	0.0365415	ABCF3	+	0.000660299	NM_018358	166	-56	utr3	long_loop	CCGGGGGTGGGGGTCTGGGGGGTACCCTCTGGGGTTATAG	CCGGGGGTGGGGTTCTGGGGGGTACCCTCTGGGGTTATAG	-2.4	-2.4	0	0	0	0
chr22:45592186-45592216	rs11678	chr22	45592196	45592197	C	T	snv	commonSome,rareSome,	0.0367412	KIAA0930	-	0.000767131	NM_001009880	178	-453	utr3	2-quartet	TTCTAGGTGGGACCCCGTCTTCTGGGGGCGGGGGTGTCTT	TTCTAGGTGGGACCCCGTCTTCTAGGGGCGGGGGTGTCTT	-3.7	-3.7	1	1	0	0
chr3:43732480-43732510	rs141365045	chr3	43732495	43732496	G	A	snv	clinvar,clinvarBenign,commonSome,rareSome,overlapDiffClass,	0.0367412	ABHD5	+	1.88087e+09	NM_016006	-1072	-1268	cds,utr5	2-quartet	GCGGCGGCTATGGCGGCGGAGGAGGAGGAGGTGGACTCTG	GCGGCGGCTATGGCGGCGGAAGAGGAGGAGGTGGACTCTG	-4	-4	1	1	0	0
chr1:179078179-179078209	rs533319298	chr1	179078196	179078197	A	C	snv	commonSome,commonAll,overlapDiffClass,	0.0373403	ABL2	-	0.00341104	NM_005158	-1439	-9686	cds	bulge	ACGACGGTGGTGGGGGTGGGGGCAGTGGCACTGCTGGGGG	ACGACGGTGGTGGGGGGGGGGGCAGTGGCACTGCTGGGGG	-2.5	-2.5	0	0	0	0
chr12:102224456-102224486	rs545117996	chr12	102224462	102224463	A	C	snv	commonSome,commonAll,	0.0377396	GNPTAB	-	0.00521639	NM_024312	-3796	-5414	utr5	bulge	CAGGCTCCTCGGGGCGTGGCGTGGCGGTGAAGGGGTGATG	CAGGCTCCTCGGGGCGTGGCGTGGCGGGGAAGGGGTGATG	-3.8	-3.8	0	0	0	0
chr16:67063095-67063125	rs568086733	chr16	67063109	67063110	G	A	snv	commonSome,commonAll,overlapDiffClass,	0.0379393	CBFB	+	0.00139422	NM_001755	-864	-3038	utr5	2-quartet	AGGCGGCGGCGGCGGCGGCGGCGGCGTGGGTTGGGCTCGA	AGGCGGCGGCGGCGGCGGCAGCGGCGTGGGTTGGGCTCGA	-13	-9.9	0	0	0	0
chr4:90646084-90646114	rs17016072	chr4	90646101	90646102	G	A	snv	clinvar,clinvarBenign,commonSome,commonAll,	0.0385383	SNCA	-	0.00151221	NM_000345	1019	-809	utr3	2-quartet	TGTGATATATATTGGGCGCTGGTGAGGAAGGAAGGAGGAA	TGTGATATATATTGGGTGCTGGTGAGGAAGGAAGGAGGAA	1.9	1.9	0	0	0	0
chr14:23371264-23371294	rs56708790	chr14	23371267	23371268	A	G	snv	commonSome,commonAll,overlapDiffClass,	0.0389377	RBM23	-	0.00507629	NM_018107	-237	-1214	cds	Others	CCAACTGCCAAGCACTGCTGCTGCTGCTGCTGCCGCCGCC	CCAACTGCCAAGCACTGCTGCTGCTGCTGCCGCCGCCGCC	-8.6	-7.9	0	0	0	0
chr20:4680207-4680237	rs8124214	chr20	4680216	4680217	A	G	snv	clinvar,clinvarBenign,commonSome,commonAll,overlapDiffClass,	0.0389377	PRNP	+	0.000719544	NM_001080123	-1639	-1973	cds	2-quartet	GCTGGTGCTGCAGCAGCTGGGGCAGTGGTGGGGGGCCTTG	GCTGGTGCTGCAGCGGCTGGGGCAGTGGTGGGGGGCCTTG	-5.2	-1.3	0	0	0	0
chr7:6203793-6203823	rs75986628	chr7	6203797	6203798	C	G	snv	commonSome,rareSome,	0.0389377	CYTH3	-	0.00469679	NM_004227	103	-2358	utr3	PQs_7	GGGGGCAGCAGGTGGGCTCGGGACGGGCTGGGGGAGGGAC	GGGGGCAGCAGGTGGGCTCGGGACGGGCTCGGGGAGGGAC	-4.7	-4.7	0	0	1	1
chr12:42538476-42538506	rs551525833	chr12	42538486	42538487	C	G	snv	commonSome,rareSome,overlapDiffClass,	0.0391374	GXYLT1	-	0.0151749	NM_001099650	-1312	-1716	utr5	2-quartet	TCCGCTCCAGTTCGTCGGGGCGGGCGCGGCGGCGGCGGCG	TCCGCTCCAGTTCGTCGGGGCGGCCGCGGCGGCGGCGGCG	-6.9	-10.2	0	0	0	0
chr11:60692032-60692062	rs111498695	chr11	60692061	60692062	G	T	snv	commonSome,rareSome,	0.0397364	TMEM132A	+	0.00128164	NM_017870	-3204	-3348	utr5	long_loop	CGGAGCGGGTGCGGGAGATGCCGTGCGGGACTGGGGCCAC	CGGAGCGGGTGCGGGAGATGCCGTGCGGGACTGGTGCCAC	0	-0.8	1	1	0	0
chr11:66817564-66817594	rs114316682	chr11	66817577	66817578	G	A	snv	commonSome,rareSome,	0.0397364	SYT12	+	0.00293242	NM_001177880	-290	-663	utr3	long_loop	GGCAGGGGCCTGGAGTACGAGGGGCACCCTGGGGGCTCCC	GGCAGGGGCCTGGAGTACAAGGGGCACCCTGGGGGCTCCC	-6.7	-7.8	0	0	0	0
chr14:77494466-77494496	rs76980172	chr14	77494483	77494484	G	C	snv	commonSome,commonAll,	0.0399361	IRF2BPL	-	0.0155854	NM_024496	-2846	-3560	utr5	2-quartet	GAGGCAACGGCGGCCACCACCGGGCACCCTCGCCCCCTCC	GAGGCAACGGCGGCCAGCACCGGGCACCCTCGCCCCCTCC	-5.9	-5.7	0	0	0	0
chr17:40277095-40277125	rs150823688	chr17	40277109	40277110	C	G	snv	commonSome,rareSome,overlapDiffClass,	0.0403355	RAB5C	-	6.03776e+06	NM_004583	21	-71	utr3	PQs_7	TTGGGGGTGGGTGGGTAAGGGGGGGAGTGGGAGGGGACGG	TTGGGGGTGGGTGGGTAAGCGGGGGAGTGGGAGGGGACGG	2.5	2	0	0	1	1
chr3:183889581-183889611	rs78781771	chr3	183889598	183889599	G	T	snv	commonSome,rareSome,overlapDiffClass,	0.0411342	DVL3	+	0.00164986	NM_004423	-72	932	utr3	2-quartet	ACCACGTGTGGCAGCCTGCGGCGGGGGGAGGGGGGCCTCT	ACCACGTGTGGCAGCCTGCGGCTGGGGGAGGGGGGCCTCT	-2.8	-3.3	0	0	0	0
chr12:106632428-106632458	rs7132695	chr12	106632435	106632436	C	T	snv	commonSome,rareSome,	0.0417332	CKAP4	-	0.00116516	NM_006825	-90	-745	utr3	2-quartet	TTTCAAGTAAAAAAAAAAAAAAGGTGGGTTGGGGGGACCC	TTTCAAGTAAAAAAAAAAAAAAGGTGAGTTGGGGGGACCC	-2.9	-2.9	1	1	0	0
chr20:5176596-5176626	rs12624765	chr20	5176625	5176626	G	T	snv	commonSome,rareSome,	0.0421326	CDS2	+	0.00663847	NM_003818	663	-1886	utr3	bulge	GGGGGTGGGGAGTTGGGGCACGTGTGTGTAAGGGGAGGCT	GGGGGTGGGGAGTTGGGGCACGTGTGTGTAAGGGTAGGCT	-0.5	-0.5	0	0	0	0
chr8:145161779-145161809	rs57433624	chr8	145161797	145161798	G	A	snv	commonSome,rareSome,overlapDiffClass,	0.0421326	MAF1	+	0.00300203	NM_032272	-401	-561	cds	bulge	CTGGACATGGAGCTGGGGGAGGAGGAGGTGGAGGAAGAAA	CTGGACATGGAGCTGGGGGAGGAAGAGGTGGAGGAAGAAA	1.7	1.7	1	1	0	0
chr19:39888489-39888519	rs3746082	chr19	39888510	39888511	G	A	snv	commonSome,rareSome,overlapDiffClass,	0.0427316	MED29	+	0.000519817	NM_017592	23	92	utr3	2-quartet	AGGGAGCTCGCAGGCCGGGCCCCTGCGTCCCTGCCCCTTC	AGGGAGCTCGCAGGCCGGGCCCCTGCATCCCTGCCCCTTC	-8.5	-6.7	0	0	0	0
chr1:110546806-110546836	rs41280336	chr1	110546830	110546831	C	G	snv	commonSome,commonAll,overlapDiffClass,	0.0429313	AHCYL1	+	5.41604e+08	NM_001242675	-1838	-3743	utr5	2-quartet	TACTGTTGAGACACAGAGGCGGGAGTCGGCGGGGGAAGAT	TACTGTTGAGACACAGAGGCGGGAGTCGGGGGGGGAAGAT	-0.6	-0.6	1	1	0	0
chr16:88800374-88800404	rs202139830	chr16	88800394	88800395	C	G	snv	commonSome,rareSome,overlapDiffClass,	0.0429313	PIEZO1	-	0.000886067	NM_001142864	-5442	-5527	cds	2-quartet	GCAGCAGCAGCAGGAGGAGGAGGAGGAGGAGGAGGACTCC	GCAGCAGCAGCAGCAGGAGGAGGAGGAGGAGGAGGACTCC	-2.8	-4.5	1	1	0	0
chr16:13332822-13332852	rs187425365	chr16	13332826	13332827	T	C	snv	commonSome,commonAll,	0.0435304	SHISA9	+	0.0110835	NM_001145204	329	-1401	utr3	Others	ATCTCCTAATGCTATCCCTCCCCCCTCCCCCCACCCCACA	ATCTCCTAACGCTATCCCTCCCCCCTCCCCCCACCCCACA	2.1	2.5	0	0	0	0
chr22:18893892-18893922	rs408469	chr22	18893901	18893902	G	C	snv	commonSome,commonAll,	0.0443291	DGCR6	+	0.000471811	NM_005675	-992	-1001	cds	bulge	ATGGAGCGCTACGCGGGCGCCTTGGAGGAGGTGGCGGACG	ATGGAGCGCTACGCCGGCGCCTTGGAGGAGGTGGCGGACG	-3.2	-3.6	0	0	0	0
chr8:142204274-142204304	rs113203930	chr8	142204292	142204293	C	T	snv	commonSome,commonAll,	0.0453275	DENND3	+	0.000595318	NM_014957	-718	-1578	cds	PQs_7	AGATACGTGCTGAGTGGGTCGGGCAGGGAGGAGGGGAAAG	AGATACGTGCTGAGTGGGTCGGGTAGGGAGGAGGGGAAAG	-0.5	1.5	0	0	1	1
chr3:49377441-49377471	rs115111440	chr3	49377467	49377468	G	C	snv	commonSome,rareSome,	0.0455272	USP4	-	0.00042471	NM_003363	-3051	-3021	cds,utr5	2-quartet	GCCGGGGCCGCGGAGGAGATGGCGGAAGGTGGAGGCTGCC	GCCGGGGGCGCGGAGGAGATGGCGGAAGGTGGAGGCTGCC	-3.5	-0.7	0	0	0	0
chr1:9428757-9428787	rs9728893	chr1	9428768	9428769	A	G	snv	refIsMinor,commonSome,rareSome,	0.0463259	SPSB1	+	1.20661e+08	NM_025106	-284	-776	utr3	PQs_7	CATTCCCCGAGAAGCCGGGGGCAGGGTGGGATGGGGAAGA	CATTCCCCGAGAAGCCAGGGGCAGGGTGGGATGGGGAAGA	-4.3	-3.2	0	0	1	1
chr1:154942624-154942654	rs543123955	chr1	154942631	154942632	A	C	snv	commonSome,commonAll,	0.047524	SHC1	-	7.87002e+09	NM_003029	-1585	-2860	cds	2-quartet	TGGAGGCGGCGGGCGCAGGACTCGGGTGGAAGGGGGCCAG	TGGAGGCGGCGGGCGCAGGACTCGGGGGGAAGGGGGCCAG	0	0.2	1	1	0	0
chr12:123459439-123459469	rs58025094	chr12	123459457	123459458	C	G	snv	commonSome,rareSome,overlapDiffClass,	0.0477236	OGFOD2	+	1.04093e+09	NM_024623	-1529	-1337	utr5	bulge	CTCCACGAGCTCCGGGCAGACGGCGGGGGGTGGGTCGGCG	CTCCACGAGCTCCGGGCAGACGGGGGGGGGTGGGTCGGCG	-4.9	-3.8	0	0	0	1
chr15:72075283-72075313	rs28458348	chr15	72075284	72075285	G	A	snv	commonSome,rareSome,	0.0485224	THSD4	+	0.00616278	NM_024817	-227	-283	utr3	bulge	CCGTGGGTGAGGCAGGTGGCTGGCGGGGACAGGGAGAGGC	CCGTGGATGAGGCAGGTGGCTGGCGGGGACAGGGAGAGGC	-1.6	-1.6	1	1	0	0
chr15:78832789-78832819	rs73463040	chr15	78832818	78832819	G	C	snv	commonSome,rareSome,	0.0485224	PSMA4	+	8.50459e+09	NM_002789	-1118	-1098	utr5	2-quartet	CATATTAGCAGCGGTTATTCGGTGAGCGGTGGTGGTTTAT	CATATTAGCAGCGGTTATTCGGTGAGCGGTGGTGCTTTAT	-3.1	-3.1	0	0	0	0
chr1:16786164-16786194	rs279023	chr1	16786167	16786168	C	T	snv	commonSome,rareSome,	0.048722	NECAP2	+	0.000338299	NM_018090	-117	-357	utr3	2-quartet	AAGCCAGACGGAACAGTGTTGGGGCAGGAAGGTGGATGCT	AAGCCAGATGGAACAGTGTTGGGGCAGGAAGGTGGATGCT	0.2	0	1	1	0	0
chr3:52871525-52871555	rs187101745	chr3	52871550	52871551	T	A	snv	commonSome,rareSome,	0.0503195	TMEM110	-	0.000723591	NM_198563	-148	-735	utr3	2-quartet	AAGGGGGGATGTTAGTGAGATCCAGGTGGTGGTGGCTTCT	AAGGGGGGTTGTTAGTGAGATCCAGGTGGTGGTGGCTTCT	-0.5	-0.5	0	0	0	0
chr9:88650303-88650333	rs61741197	chr9	88650331	88650332	C	G	snv	commonSome,commonAll,	0.0504428	GOLM1	-	0.000686972	NM_016548	-290	-1860	cds	2-quartet	GACCAGCTTGTCATCCCCGACGGACAGGAGGAGGAGCAGG	GACCACCTTGTCATCCCCGACGGACAGGAGGAGGAGCAGG	-7.4	-3.8	1	1	0	0
chr22:20073984-20074014	rs35987994	chr22	20074005	20074006	A	G	snv	commonSome,commonAll,	0.0505192	DGCR8	+	0.0016691	NM_022720	-2107	-3538	cds	2-quartet	GCGGGAGTGTTGGTGACGGGGTAGGCATAGGGGGTGAGAG	GCGGGAGTGTTGGTGACGGGGTAGGCGTAGGGGGTGAGAG	1.2	1.2	0	0	0	0
chr5:78075992-78076022	rs73770019	chr5	78076017	78076018	T	C	snv	clinvar,clinvarBenign,commonSome,rareSome,	0.0507243	ARSB	-	0.00589114	NM_000046	-182	-1526	utr3	bulge	GCTGGAGCATGTGTCTAGAGGTGGGGGTGGCTGGGTTTAT	GCTGGAGCGTGTGTCTAGAGGTGGGGGTGGCTGGGTTTAT	-0.7	-0.7	0	0	0	0
chr1:153914474-153914504	rs56190300	chr1	153914499	153914500	G	A	snv	commonSome,rareSome,overlapDiffClass,	0.0510217	DENND4B	-	0.0135317	NM_014856	-3849	-4332	cds	long_loop	CTGAGCGCCGTGGAGCGGGGTCGGGCACTGGGGGGCAGAG	CTGAGCGCTGTGGAGCGGGGTCGGGCACTGGGGGGCAGAG	-2.5	-2.5	0	0	0	0
chr1:226033418-226033448	rs45616640	chr1	226033438	226033439	G	A	snv	commonSome,commonAll,overlapDiffClass,	0.0511157	TMEM63A	-	0.00140861	NM_014698	832	-160	utr3	bulge	CAAGCTGCCCCTGCGCTGGGAGGGGTGGGGGCGGTGCCAT	CAAGCTGCCCCTGTGCTGGGAGGGGTGGGGGCGGTGCCAT	-3.1	-3.1	0	0	0	0
chr2:174939183-174939213	rs17316500	chr2	174939186	174939187	C	T	snv	commonSome,commonAll,overlapDiffClass,	0.0511182	OLA1	-	0.0032264	NM_013341	391	539	utr3	Others	TTCTTACTTTTCAGATATTTGAGAGCAGTCGAAGTGGTAG	TTCTTACTTTTCAGATATTTGAGAGCAGTCAAAGTGGTAG	-0.6	-1.2	0	0	0	0
chr5:43556952-43556982	rs187350481	chr5	43556975	43556976	G	A	snv	commonSome,rareSome,	0.0514019	PAIP1	-	0.000123119	NM_182789	-1359	-1365	utr5	2-quartet	GCAGCGGCCCCTGGAGGAGGAGGCGGAGGAGGAGGAGCAT	GCAGCGGCCCTTGGAGGAGGAGGCGGAGGAGGAGGAGCAT	-1.9	0.1	0	0	0	0
chr1:26159221-26159251	rs58504236	chr1	26159224	26159225	G	A	snv	commonSome,rareSome,	0.0516214	FAM54B	+	0.00271912	NM_001099625	-138	-153	utr3	2-quartet	TTAAGCCCGGTAGGAAAGAGAGAGGAGGAGGGGGAAAGAG	TTAAGCCCAGTAGGAAAGAGAGAGGAGGAGGGGGAAAGAG	0.5	0.6	0	0	0	0
chr11:130013361-130013391	rs2228999	chr11	130013368	130013369	C	T	snv	commonSome,commonAll,	0.0516667	APLP2	+	8.10995e+09	NM_001142276	-94	-87	utr3	2-quartet	CGGCAGCCCTGGCGGAGGGATGCAGGTGGGCCGGAAGATC	CGGCAGCCCTGGTGGAGGGATGCAGGTGGGCCGGAAGATC	-7.3	-7.3	0	0	0	0
chr13:30087141-30087171	rs3011624	chr13	30087145	30087146	G	A	snv	refIsMinor,commonSome,rareSome,	0.0518868	SLC7A1	-	6.64658e+08	NM_003045	76	-3571	utr3	bulge	GGCCCATGCTGATGGGGGAGGAGGAGGGATGTGGGCATTT	GGCCCATGCTGATGGGGGAGGAGGAGGGACGTGGGCATTT	-2.8	-2.8	0	0	0	0
chr11:60617991-60618021	rs41530751	chr11	60617992	60617993	G	T	snv	commonSome,rareSome,overlapDiffClass,	0.0519169	CCDC86	+	8.82246e+09	NM_024098	-41	-515	utr3	long_loop	GAGGGGGCCTGGGACCTGGCAGAGATGGGGGCGGGAAGAG	GAGGGGTCCTGGGACCTGGCAGAGATGGGGGCGGGAAGAG	-2.8	-1.1	1	1	0	0
chr10:65384517-65384547	rs7913277	chr10	65384542	65384543	A	G	snv	commonSome,rareSome,	0.0520209	REEP3	+	0.00421448	NM_001001330	826	-319	utr3	Others	CTGAATTGTTAAATTTGGATGTTAGAAAGGAAAGATAGGA	CTGAATTGTTAAATTTGGATGTTAGAAAGGGAAGATAGGA	0	0	0	0	0	0
chrX:70280554-70280584	rs73548335	chrX	70280567	70280568	G	A	snv	commonSome,commonAll,	0.0521854	SNX12	-	0.0021694	NM_013346	6	-1438	utr3	2-quartet	ACCCATGCCAGAAGGCTAACCTGGGGGGAGGGGGGCGCTT	ACCCATGCCAGAAGGCTAACTTGGGGGGAGGGGGGCGCTT	-2.2	-2.2	1	1	0	0
chr12:48735090-48735120	rs56383074	chr12	48735113	48735114	G	T	snv	commonSome,commonAll,	0.0524258	ZNF641	-	0.00212736	NM_001172681	-85	-1158	utr3	2-quartet	TATGTAAGAGCAGTTCGGGGTTAGGGAGGAAGAGGAGCAA	TATGTAAGAGAAGTTCGGGGTTAGGGAGGAAGAGGAGCAA	1.5	1.5	0	0	0	0
chr17:34151132-34151162	rs570392431	chr17	34151148	34151149	T	G	snv	commonSome,rareSome,	0.0527157	TAF15	+	1.20689e+08	NM_139215	-1277	-1479	cds	long_loop	TGGCGGGTCACAGGGAGGAGGTAGAGGGCGTGGGGGATAT	TGGCGGGTCACAGGGAGGAGGGAGAGGGCGTGGGGGATAT	1.1	1.1	0	0	0	1
chr5:118604462-118604492	rs55703318	chr5	118604485	118604486	C	T	snv	commonSome,commonAll,	0.052816	TNFAIP8	+	0.00470555	NM_001077654	-736	-1500	utr5	Others	GCCTCCTTTTCTCCCGCCGGCTCTAACCCGCGCTTGGCTA	GCCTCCTTTTCTCCCGCCGGCTCTAACCTGCGCTTGGCTA	-4.6	-5	1	1	0	0
chr1:226033418-226033448	rs45528642	chr1	226033420	226033421	G	A	snv	commonSome,commonAll,	0.0528587	TMEM63A	-	0.00140861	NM_014698	832	-160	utr3	bulge	CAAGCTGCCCCTGCGCTGGGAGGGGTGGGGGCGGTGCCAT	CAAGCTGCCCCTGCGCTGGGAGGGGTGGGGGTGGTGCCAT	-3.1	-2.7	0	0	0	0
chr9:17135247-17135277	rs2774619	chr9	17135258	17135259	C	T	snv	commonSome,rareSome,	0.053115	CNTLN	+	0.000554064	NM_017738	-4032	-5257	cds	PQs_7	AGAAGGGTCAGGGGGCCGGCGAGGGCCTGGGGGGGCAGCT	AGAAGGGTCAGGGGGCTGGCGAGGGCCTGGGGGGGCAGCT	-4.8	-1.3	0	0	1	1
chr12:102316754-102316784	rs117146578	chr12	102316762	102316763	T	C	snv	commonSome,commonAll,	0.0533177	DRAM1	+	0.00127631	NM_018370	-176	-588	utr3	2-quartet	CCTGTAGTCCTAGTTACTTGGGAGGCTGAGGTGGGAGAAT	CCTGTAGTCCTAGCTACTTGGGAGGCTGAGGTGGGAGAAT	-0.4	-0.8	0	0	0	0
chr19:46318791-46318821	rs3810332	chr19	46318798	46318799	C	G	snv	commonSome,rareSome,overlapDiffClass,	0.0535144	SYMPK	-	0.00442631	NM_004819	-51	-64	utr3	PQs_7	ACAGCTGACGGGGCTCGAGGGGGAAAGGGGGTGGGACAGG	ACAGCTGACGGGGCTCGAGGGGGAAACGGGGTGGGACAGG	-0.1	-0.1	1	1	1	1
chr22:36136572-36136602	rs62233617	chr22	36136573	36136574	C	T	snv	commonSome,commonAll,	0.0535714	RBFOX2	-	1.38567e+08	NM_001082576	-37	-1770	utr3	bulge	AGATACTAGGAGGAAAGGGACTTTGGGGGGTGGGGAAGGG	AGATACTAGGAGGAAAGGGACTTTGGGGGGTGAGGAAGGG	-1.8	-1.8	1	1	1	0
chr14:81259226-81259256	rs45535733	chr14	81259253	81259254	A	T	snv	commonSome,commonAll,	0.0537946	CEP128	-	0.00059438	NM_152446	-1967	-2821	cds	bulge	AGAGGCTCTGAAAGAGGAGGCGGAGAAGAGGAGGGAAGAC	AGAGGCACTGAAAGAGGAGGCGGAGAAGAGGAGGGAAGAC	-1.4	0.2	0	0	0	0
chr7:135613232-135613262	rs17168525	chr7	135613261	135613262	G	A	snv	commonSome,rareSome,	0.0539137	LUZP6	-	17082.2	NM_001128619	-1451	-1703	utr5	PQs_7	TGTACCTCAAATTTTTAGGGGAGGGTGGGTTAGGGACTGA	TGTATCTCAAATTTTTAGGGGAGGGTGGGTTAGGGACTGA	-1	0.2	1	1	1	1
chr14:77275624-77275654	rs34270005	chr14	77275629	77275630	C	A	snv	commonSome,rareSome,overlapDiffClass,	0.0540026	ANGEL1	-	0.000276817	NM_015305	-1763	-3544	cds	bulge	AGGAGAGGAGCCACTGCTGGAGGTGGAGGGGGTGGAGGGC	AGGAGAGGAGCCACTGCTGGAGGTGGAGTGGGTGGAGGGC	-1.8	-1.8	0	0	0	0
chr16:4308006-4308036	rs78379133	chr16	4308031	4308032	G	T	snv	commonSome,rareSome,	0.0541134	TFAP4	-	0.00470363	NM_003223	-88	-795	utr3	2-quartet	TCCTCTCCCTTCTGGGGGCTGGAGGGAGCCGGGGCAGCCA	TCCTCTCCATTCTGGGGGCTGGAGGGAGCCGGGGCAGCCA	-3.1	-2.7	0	0	0	0
chr8:90914765-90914795	rs138666179	chr8	90914788	90914789	A	G	snv	commonSome,commonAll,	0.0542411	OSGIN2	+	0.00123327	NM_001126111	-2084	-1913	utr5	Others	CGCTCCGCCCCTATCGCGGCGCCCCGAGATCACCCGCCTC	CGCTCCGCCCCTATCGCGGCGCCCCGAGGTCACCCGCCTC	-5.9	-5.9	0	0	0	0
chr16:2164288-2164318	rs35965348	chr16	2164293	2164294	G	A	snv	clinvar,clinvarBenign,commonSome,commonAll,	0.0545188	PKD1	-	0.000940299	NM_001009944	-10225	-11172	cds	bulge	GGCTCAGTGAGGGGGAGCACGTGGTGGACGTGGTGGTGGA	GGCTCAGTGAGGGGGAGCACGTGGTGGATGTGGTGGTGGA	-3.7	-1.2	0	0	0	0
chr7:766403-766433	rs9719797	chr7	766428	766429	G	A	snv	clinvar,clinvarBenign,commonSome,rareSome,	0.0545455	HEATR2	+	0.00158483	NM_017802	-3074	-3295	cds	2-quartet	CCCGGCTGAGGGGGCCGAGACGGCTGAGGCGGTGGAGCTG	CCCGGCTGAGGGGGCCGAGACGGCTGAGGCAGTGGAGCTG	-7.7	-6.9	0	0	0	0
chr3:122289353-122289383	rs9868175	chr3	122289368	122289369	A	T	snv	commonSome,rareSome,overlapDiffClass,	0.05456	DTX3L	+	0.00174867	NM_138287	-1876	-3638	cds	2-quartet	TGCATACTTGCCTGATAATAAGGAAGGAAGGAAGGTTTTG	TGCATACTTGCCTGATAATATGGAAGGAAGGAAGGTTTTG	-0.6	-0.6	0	0	0	0
chr5:110097338-110097368	rs79149180	chr5	110097361	110097362	G	T	snv	clinvar,clinvarBenign,commonSome,rareSome,	0.0549033	SLC25A46	+	0.000958897	NM_138773	-998	-1098	cds	2-quartet	GAGACTGTATCAATACCATAAGGCAGGAGGAAGGAGTGTT	GAGACTGTATCAATACCATAAGGCAGGATGAAGGAGTGTT	0.7	0.7	1	1	0	0
chr11:74553052-74553082	rs80252847	chr11	74553076	74553077	T	C	snv	commonSome,rareSome,overlapDiffClass,	0.0549121	RNF169	+	0.00439492	NM_001098638	0	-352	utr3	Others	TAGTTTTTTTTTTTTTGAACCTGATACACTGTTTGTTTAC	TAGTTTTTTTTTTTTTGAACCTGATACACCGTTTGTTTAC	-0.1	-0.1	1	1	0	0
chr15:40758473-40758503	rs12102072	chr15	40758476	40758477	G	A	snv	commonSome,commonAll,	0.0549121	BAHD1	+	0.00535225	NM_014952	0	-1897	utr3	PQs_7	GGGCCCCTGTGGGTTCTGGGCTCCAGGGGAGGGAGCTGGG	GGGCCCCTATGGGTTCTGGGCTCCAGGGGAGGGAGCTGGG	-3.7	-3.3	0	0	1	1
chr22:30685482-30685512	rs1860216	chr22	30685494	30685495	G	A	snv	commonSome,commonAll,overlapDiffClass,	0.055	GATSL3	-	0.00223367	NM_001037666	-1275	-1468	cds,utr5	bulge	GGCGGCGGGGTCGGGTCCGCGCGAGCCGCGATGGAGCTGC	GGCGGCGGGGTCGGGTCCGCGTGAGCCGCGATGGAGCTGC	-7.7	-7.9	0	0	0	0
chr2:129025694-129025724	rs112636716	chr2	129025704	129025705	C	G	snv	commonSome,commonAll,overlapDiffClass,	0.0551118	HS6ST1	-	0.000270421	NM_004807	-340	-2618	utr3	bulge	GGTGGCCACGGGGAGGCCTCTTGGGGGGTGTGGGGGATAA	GGTGGCCACGGGGAGGCCTCTTGCGGGGTGTGGGGGATAA	-2.6	-2.6	0	0	0	0
chr16:3535814-3535844	rs74005811	chr16	3535839	3535840	G	A	snv	commonSome,commonAll,	0.0557109	NAA60	+	1.97289e+09	NM_001083600	406	-1089	utr3	PQs_7	CATGAGGGGCTGATGAGGGGTGGGCAGCCTGGGGGAGGCT	CATGAGGGGCTGATGAGGGGTGGGCAGCCTAGGGGAGGCT	-4	-4.3	0	0	1	1
chr17:37561119-37561149	rs72825175	chr17	37561130	37561131	C	A	snv	commonSome,commonAll,overlapDiffClass,	0.0558036	MED1	-	1.18291e+08	NM_004774	-29	-557	utr3	2-quartet	TAAAACAGAAGTATTTTAGCGGGTGGGGGGTGGGGTGGTG	TAAAACAGAAGTATTTTAGCGGTTGGGGGGTGGGGTGGTG	-0.3	-0.3	1	1	0	0
chr16:69497222-69497252	rs62052769	chr16	69497227	69497228	G	A	snv	commonSome,commonAll,	0.0558818	CYB5B	+	7.88009e+07	NM_030579	619	-2893	utr3	2-quartet	TGGCCCTTTCGTGTCTTGGGGGTGGAAAGGTAGGGATGAA	TGGCCCTTTCATGTCTTGGGGGTGGAAAGGTAGGGATGAA	-2.2	-2.2	0	0	0	0
chr15:85525515-85525545	rs181576780	chr15	85525522	85525523	C	T	snv	commonSome,rareSome,	0.0566038	PDE8A	+	0.000521812	NM_173454	-2625	-2883	cds	Others	GCCGCCTTGCCCCGGACCCGCGGCGCCGGCCTCTTGGAGT	GCCGCCTTGCCCTGGACCCGCGGCGCCGGCCTCTTGGAGT	-6.8	-3.8	1	1	0	0
chr1:150969541-150969571	rs771202	chr1	150969566	150969567	G	A	snv	refIsMinor,commonSome,rareSome,	0.0569089	FAM63A	-	0.00145131	NM_001040217	0	-210	utr3	2-quartet	GCCTCCCATCCAGGGCAACACTAGGATTGGTGGGTTTCTG	GCCTCCCACCCAGGGCAACACTAGGATTGGTGGGTTTCTG	-5.7	-3.6	0	0	0	0
chr2:3502305-3502335	rs3350	chr2	3502307	3502308	C	A	snv	commonSome,commonAll,	0.0569089	ADI1	-	0.00077774	NM_018269	-69	-58	utr3	2-quartet	CAAAATGATGCCTTGGGGTGGGGAGTGGTAGGGGGAAGAG	CAAAATGATGCCTTGGGGTGGGGAGTGGTAGTGGGAAGAG	0.9	0.9	0	0	0	0
chr4:17506020-17506050	rs12645938	chr4	17506041	17506042	G	A	snv	clinvar,clinvarBenign,commonSome,commonAll,	0.0569196	QDPR	-	3.82474e+09	NM_000320	-462	-1173	cds	2-quartet	TGCAATTCTTTGCGTTGCTGGAGGATGGGCCGGGGGCAAT	TGCAATTCTTTGTGTTGCTGGAGGATGGGCCGGGGGCAAT	-1.6	-1.3	0	0	0	0
chr2:54895832-54895862	rs73934514	chr2	54895850	54895851	G	T	snv	commonSome,commonAll,overlapDiffClass,	0.0571657	SPTBN1	+	0.00736639	NM_003128	-15	-931	utr3	2-quartet	TTTTTAATTTATAGAGCATTTCGGGGGGGGTGGGGGAAAC	TTTTTAATTTATAGAGCATTTCGTGGGGGGTGGGGGAAAC	0.8	0.8	0	0	0	0
chr6:43971093-43971123	rs9472187	chr6	43971107	43971108	G	A	snv	commonSome,rareSome,	0.0573083	C6orf223	+	0.00680986	NM_001171992	-117	-1740	utr3	PQs_7	AGAGTGGGGAGGGGCCAGGGACCTATTTCGTTGACAGAAA	AGAGTGGGGAGGGGCCAGGAACCTATTTCGTTGACAGAAA	-0.8	-0.8	2	2	0	0
chr9:33441703-33441733	rs534338882	chr9	33441732	33441733	A	C	snv	commonSome,rareSome,overlapDiffClass,	0.0573083	AQP3	-	0.000395848	NM_004925	-13	-522	utr3	bulge	CATGTGTGTGCAGGGGTGTGTGTGTGTGGGGGGGGTTCCC	CATGGGTGTGCAGGGGTGTGTGTGTGTGGGGGGGGTTCCC	-1.6	-1.6	0	0	0	0
chr19:55902134-55902164	rs45603534	chr19	55902149	55902150	G	C	snv	commonSome,commonAll,	0.0573661	RPL28	+	0.000321318	NM_000991	2412	-951	utr3	long_loop	GGGGTGGAGGAACCAGGAGAGGGCTGGAGGGAGGGAGATG	GGGGTGGAGGAACCAGGAGACGGCTGGAGGGAGGGAGATG	-1	-1	1	1	0	0
chr11:727449-727479	rs75754018	chr11	727451	727452	C	T	snv	commonSome,commonAll,	0.057508	EPS8L2	+	0.000616541	NM_022772	406	-224	utr3	bulge	AGGAGGCCGTGGGTGCCATTCGGGGGAAAGTGGGGGAACG	AGGAGGCTGTGGGTGCCATTCGGGGGAAAGTGGGGGAACG	-0.5	-0.7	0	0	0	0
chr22:38202614-38202644	rs1894645	chr22	38202641	38202642	T	G	snv	refIsMinor,commonSome,commonAll,overlapDiffClass,	0.0576025	H1F0	+	5.68325e+07	NM_005318	-285	-774	utr3	2-quartet	GTAGGGAGCAGCCAGCCGGCAAAGGAAGGAGGGGGAAAAA	GTAGGGAGCAGCCAGCCGGCAAAGGAAGGAGGTGGAAAAA	-1.3	-1.3	0	0	0	0
chr19:55876821-55876851	rs4252560	chr19	55876828	55876829	C	G	snv	commonSome,rareSome,	0.0577077	IL11	-	0.00247372	NM_000641	125	92	utr3	2-quartet	GACCTCCATTCAGGTGGAGGTCCCGAGTGGGCGGGGCAGC	GACCTCCATTCAGGTGGAGGTCCCGACTGGGCGGGGCAGC	-7.4	-7.4	0	0	0	0
chr5:157166623-157166653	rs11550594	chr5	157166648	157166649	G	A	snv	commonSome,commonAll,	0.058107	THG1L	+	5.16181e+07	NM_017872	-96	-99	utr3	PQs_7	GGAGGGGAACAGGGAAGGAAGGGATGGATGGGGGTGGTGT	GGAGGGGAACAGGGAAGGAAGGGATGGATGAGGGTGGTGT	2.2	2.2	1	1	1	0
chr19:2231027-2231057	rs11548482	chr19	2231056	2231057	G	A	snv	commonSome,commonAll,	0.0583067	DOT1L	+	0.00326478	NM_032482	352	351	utr3	bulge	CCTTGGCGGGTGCCTGGGACTGGGTGTGGAAGGAGAGGAG	CCTTGGCGGGTGCCTGGGACTGGGTGTGGAAGGAAAGGAG	-2.3	-2.3	1	1	0	0
chr5:153825967-153825997	rs2277938	chr5	153825972	153825973	G	C	snv	commonSome,rareSome,overlapDiffClass,	0.0583067	SAP30L	+	0.00486316	NM_024632	-795	-816	utr5	long_loop	GAGGAAGGGGGCTTCCGGAGGCGGAGGGCCGGGGGCCGAG	GAGGAAGGGGCCTTCCGGAGGCGGAGGGCCGGGGGCCGAG	-4.1	-6.1	0	0	0	0
chr1:249105152-249105182	rs137922302	chr1	249105157	249105158	C	T	snv	commonSome,commonAll,	0.0585221	SH3BP5L	-	0.00124309	NM_030645	-5	-482	utr3	Others	CTGACTCAGCACCCTCCTGCAGGACGGGGTTAGGGAATTT	CTGACTCAGCACCCTCCTGCAGGACGGGATTAGGGAATTT	-1.3	-1.3	1	1	0	0
chr6:47445908-47445938	rs9349406	chr6	47445926	47445927	A	T	snv	refIsMinor,clinvar,clinvarBenign,commonSome,rareSome,overlapDiffClass,	0.0586207	CD2AP	+	0.000237822	NM_012120	-2135	-2811	utr5	2-quartet	GGAGCGGCCGCGCGAGCCACCACTGGAGGAGGAGGAGGAG	GGAGCGGCCGCGCGAGCCACCACAGGAGGAGGAGGAGGAG	-3.1	-8.3	0	0	0	0
chr12:115108876-115108906	rs3741695	chr12	115108898	115108899	C	T	snv	clinvar,clinvarBenign,commonSome,commonAll,overlapDiffClass,	0.0589058	TBX3	-	0.00022751	NM_016569	-84	-112	utr3	PQs_7	CCAAGGGAGGGGGGGATTTAAAGGGAAGGAGTGGGCAAAA	CCAAGGGAGGGAGGGATTTAAAGGGAAGGAGTGGGCAAAA	0.7	0.6	0	0	1	1
chr12:12284910-12284940	rs1012672	chr12	12284914	12284915	G	A	snv	commonSome,rareSome,	0.0590169	LRP6	-	0.0022116	NM_002336	-1126	-6106	cds	2-quartet	ATTGACTGTATCCCTGTGGCTTGGCGGTGCGATGGGTTTA	ATTGACTGTATCCCTGTGGCTTGGCGGTGTGATGGGTTTA	0.9	1	1	1	0	0
chr4:71683821-71683851	rs77486851	chr4	71683834	71683835	A	G	snv	commonSome,rareSome,	0.0591054	GRSF1	-	0.0121684	NM_002092	1001	1425	utr3	G_40	TGAACCTGGGAGGCAGAGGTTGTAGCGAGCCAAGATCACA	TGAACCTGGGAGGCAGAGGTCGTAGCGAGCCAAGATCACA	-1.4	-1.1	1	1	0	0
chr6:52144213-52144243	rs2307331	chr6	52144220	52144221	C	T	snv	commonSome,commonAll,	0.0596962	MCM3	-	2.33627e+09	NM_002388	-2091	-2257	cds	bulge	AAAGCGAAGCCTGGTGACCGGGTTCAGGTGGTGGGAACCT	AAAGCGAAGCCTGGTGACCGGGTTCAAGTGGTGGGAACCT	-3.2	-3.2	2	2	0	0
chr12:106632428-106632458	rs7303700	chr12	106632440	106632441	T	C	snv	commonSome,commonAll,overlapDiffClass,	0.0601038	CKAP4	-	0.00116516	NM_006825	-90	-745	utr3	2-quartet	TTTCAAGTAAAAAAAAAAAAAAGGTGGGTTGGGGGGACCC	TTTCAAGTAAAAAAAAAAAAAGGGTGGGTTGGGGGGACCC	-2.9	-2.9	1	1	0	0
chr22:21213319-21213349	rs117593372	chr22	21213330	21213331	A	T	snv	clinvar,clinvarBenign,commonSome,rareSome,	0.0607477	SNAP29	+	0.000429032	NM_004782	-1104	-945	utr5	2-quartet	GTCGGCGGGCGGGGCGAGGCCCTGGACGGCGGCGGCAGTG	GTCGGCGGGCGGGGCGTGGCCCTGGACGGCGGCGGCAGTG	-7.1	-7.1	0	0	0	0
chr7:38764269-38764299	rs148188669	chr7	38764270	38764271	A	C	snv	commonSome,commonAll,overlapDiffClass,	0.0609375	VPS41	-	0.00636809	NM_014396	518	-659	utr3	2-quartet	GAGAATCACTTGACCCCAGGAGACGTAGGTTGTGGTGAGC	GAGAATCACTTGACCCCAGGAGACGTAGGTTGGGGTGAGC	-1.1	-3.9	1	1	0	0
chr1:117654423-117654453	rs1289660	chr1	117654442	117654443	A	G	snv	commonSome,commonAll,overlapDiffClass,	0.0611022	TRIM45	-	0.00726205	NM_025188	361	376	utr3	Others	GCTGGGATTACAGGTTCCCCCCCACCTTCCCCCACACCCA	GCTGGGATTACAGGCTCCCCCCCACCTTCCCCCACACCCA	-1.8	-0.9	0	0	0	0
chr20:4680105-4680135	rs62637686	chr20	4680117	4680118	T	C	snv	clinvar,clinvarBenign,commonSome,rareSome,overlapDiffClass,	0.0611022	PRNP	+	2.13554e+09	NM_001080123	-1741	-2075	cds	2-quartet	GGTGGCTGGGGACAGCCTCATGGTGGTGGCTGGGGTCAAG	GGTGGCTGGGGACAGCCCCATGGTGGTGGCTGGGGTCAAG	-5.5	-5.9	1	1	0	0
chr17:2593073-2593103	rs74821358	chr17	2593089	2593090	T	C	snv	commonSome,rareSome,	0.061901	KIAA0664	-	2.14526e+09	NM_015229	2	-366	utr3	PQs_7	ACAGTGGGCCGGGGGCGAGGCTGGGGGAAGCGGGGCCCAA	ACAGTGGGCCGGGGGCGGGGCTGGGGGAAGCGGGGCCCAA	-4.2	-4.2	0	0	1	1
chr5:54922142-54922172	rs75004233	chr5	54922171	54922172	C	T	snv	commonSome,rareSome,	0.061901	SLC38A9	-	0.00490018	NM_173514	-161	-336	utr3	Others	TAATGAGTATTTTTTTATTGGGGTGGGGAAAGGGGCAAAA	TAATAAGTATTTTTTTATTGGGGTGGGGAAAGGGGCAAAA	1	0	0	0	0	0
chr7:44252013-44252043	rs12670584	chr7	44252017	44252018	C	G	snv	commonSome,commonAll,	0.061901	YKT6	+	0.000206064	NM_006555	-113	-1828	utr3	2-quartet	AAGTTCCTGCGAGAAATGGATGGTGGAAGGGTGGCGAATG	AAGTTCCTGGGAGAAATGGATGGTGGAAGGGTGGCGAATG	0.4	0.4	0	0	0	0
chr10:89500997-89501027	rs150809990	chr10	89501019	89501020	T	G	snv	commonSome,rareSome,	0.0623003	PAPSS2	+	0.00575123	NM_004670	-803	-2454	cds	2-quartet	TGGTGATGGAAAGTGGGGACTGGCTGGTTGGTGGAGACCT	TGGTGATGGAAAGTGGGGACTGGCTGGGTGGTGGAGACCT	-0.5	-0.5	2	2	0	0
chr7:100172840-100172870	rs3197597	chr7	100172857	100172858	C	T	snv	commonSome,commonAll,	0.0623003	LRCH4	-	0.00279147	NM_002319	-190	-538	cds	2-quartet	GACCGCGCTGGAGGCCGTGAAGCGGGTGGGGGGCAAGGCC	GACCGCGCTGGAGGCCATGAAGCGGGTGGGGGGCAAGGCC	-4.9	-4.3	0	0	0	0
chr19:11373128-11373158	rs542784008	chr19	11373147	11373148	C	A	snv	commonSome,commonAll,overlapDiffClass,	0.0625	DOCK6	-	0.00692295	NM_020812	-6308	-6335	utr5	long_loop	GCGGCGGGGCCGGGGCCCGGGGCGGCGGCGGCGGGACGCG	GCGGCGGGGCCGGGTCCCGGGGCGGCGGCGGCGGGACGCG	-20.8	-9	0	0	0	0
chr16:8946902-8946932	rs1058982	chr16	8946903	8946904	C	A	snv	commonSome,commonAll,	0.0625324	CARHSP1	-	1.04042e+08	NM_014316	1484	-77	utr3	bulge	GGGAAACTCCTCGAGGCTCTGGGAGGGACGGAGGGTTTTG	GGGAAACTCCTCGAGGCTCTGGGAGGGACGGATGGTTTTG	-1.1	-0.7	1	1	0	0
chr13:32760449-32760479	rs34413414	chr13	32760475	32760476	C	A	snv	commonSome,commonAll,	0.0629464	FRY	+	0.00579215	NM_023037	-5799	-6804	cds	Others	TTTTCATCTTATTCAGCCAGTGGGCAGGACCCTTCAGCAT	TTTTCATCTTATTCAGCCAGTGGGCAGGACCATTCAGCAT	-1.4	-1.4	1	1	0	0
chr6:42833993-42834023	rs9471934	chr6	42834020	42834021	G	A	snv	commonSome,rareSome,	0.063099	KIAA0240	+	0.00437168	NM_015349	-194	-2226	utr3	Others	CCAGTTAAGAGGCACAGTGTACAGAGGAGGCCGGGATAGA	CCAGTTAAGAGGCACAGTGTACAGAGGAGGCCAGGATAGA	0.4	0.4	0	0	0	0
chr3:66430330-66430360	rs79215032	chr3	66430347	66430348	T	A	snv	commonSome,commonAll,	0.0633108	LRIG1	-	0.00839048	NM_015541	-12	-1085	utr3	2-quartet	TATCAGGTTGCTGTTTAATTTTGGAGGGGGTGGGGAAATA	TATCAGGTTGCTGTTTTATTTTGGAGGGGGTGGGGAAATA	1.6	1	0	0	0	0
chr17:41476382-41476412	rs3179285	chr17	41476396	41476397	G	T	snv	commonSome,commonAll,overlapDiffClass,	0.0633929	ARL4D	+	1.26106e+09	NM_001661	-988	-1304	utr5	bulge	GCGCGGTGGGTGTCTGCGGGGGTCTCGCGGGGCGGCTGCG	GCGCGGTGGGTGTCTGCGGTGGTCTCGCGGGGCGGCTGCG	-1.6	-1.6	0	0	0	0
chr1:89449157-89449187	rs59048247	chr1	89449167	89449168	T	A	snv	commonSome,rareSome,	0.0634984	RBMXL1	-	0.00559987	NM_019610	-837	-3998	cds	2-quartet	AGAGGTTTTGGAGCTGGAAGAGGAGGAAGTGGAGGAACCA	AGAGGTTTTGGAGCTGGAAGAGGTGGAAGTGGAGGAACCA	-0.5	-0.5	1	1	0	0
chr11:61633175-61633205	rs482548	chr11	61633181	61633182	C	T	snv	commonSome,commonAll,	0.0636127	FADS2	+	0.00573798	NM_004265	-1090	-1597	utr3	PQs_7	CCCCGGGACACCGTGGGGAAGGGGTGCAGGTGGGGTGATG	CCCCGGGACACTGTGGGGAAGGGGTGCAGGTGGGGTGATG	-4.7	-2.7	1	1	1	1
chr11:62283800-62283830	rs76939572	chr11	62283813	62283814	T	C	snv	commonSome,commonAll,overlapDiffClass,	0.0636161	AHNAK	-	3.65313e+08	NM_001620	92	-403	utr3	bulge	CTTTGGGGGCTTTTGTTAGTAAGGGTGGGTGGGGTGATGG	CTTTGGGGGCTTTTGTTAGTGAGGGTGGGTGGGGTGATGG	1.6	2.3	0	0	0	0
chr9:96441546-96441576	rs1132027	chr9	96441554	96441555	C	T	snv	commonSome,commonAll,	0.0638203	PHF2	+	1.8088e+06	NM_005392	-149	-265	utr3	long_loop	AGTCCCTAGGGCCCGAGACTGGGTGGGAGAGGGGGAGTCT	AGTCCCTAGGGCCTGAGACTGGGTGGGAGAGGGGGAGTCT	-1.7	-1.7	1	1	0	0
chr17:34895011-34895041	rs76203149	chr17	34895026	34895027	G	A	snv	commonSome,commonAll,	0.0638978	PIGW	+	0.00128436	NM_178517	442	-68	utr3	2-quartet	TGTGACATTGAAAGACTGTTGGGGTGGGGGGAGGAAAATT	TGTGACATTGAAAGACTGTTAGGGTGGGGGGAGGAAAATT	1.2	1.2	2	2	0	0
chr7:116502607-116502637	rs192510686	chr7	116502627	116502628	T	C	snv	commonSome,rareSome,overlapDiffClass,	0.0638978	CAPZA2	+	0.0126883	NM_006136	-1001	-1650	utr5	2-quartet	GGAAACGGGGAAGTCAGGTGGCCGCTGCCGCCGCCGCCGC	GGAAACGGGGAAGTCAGGTGGCCGCCGCCGCCGCCGCCGC	-8.8	-8.7	0	0	0	0
chr19:58724377-58724407	rs1015224	chr19	58724379	58724380	G	A	snv	commonSome,commonAll,	0.0640423	ZNF274	+	0.00447516	NM_133502	-186	-495	cds	Others	ATCAGAGGACTCACACCGGGGAGCGCCCATATGCATGCAA	ATCAGAGAACTCACACCGGGGAGCGCCCATATGCATGCAA	-1	-1	1	1	0	0
chr13:113732999-113733029	rs35155188	chr13	113733008	113733009	C	T	snv	commonSome,commonAll,	0.0640974	MCF2L	+	0.00150535	NM_001112732	-2086	-3262	cds	2-quartet	AGCCGGCAGGGCCGCGGCTCAGCGGGGGAGGAGGAGGAAA	AGCCGGCAGGGCCGTGGCTCAGCGGGGGAGGAGGAGGAAA	-3.5	-3.5	0	0	0	0
chr1:6845558-6845588	rs192783463	chr1	6845563	6845564	G	A	snv	commonSome,commonAll,	0.0641785	CAMTA1	+	1.05082e+09	NM_001195563	-277	-495	utr5	2-quartet	GCGCGCGCTCGGGGTCCCGGTCGCGAGGAGGAGGAGGATG	GCGCGCGCTCAGGGTCCCGGTCGCGAGGAGGAGGAGGATG	-5	-2.2	0	0	0	0
chr19:36632048-36632078	rs11084845	chr19	36632059	36632060	T	A	snv	commonSome,commonAll,overlapDiffClass,	0.0642971	CAPNS1	+	0.00030388	NM_001749	-929	-1128	cds	2-quartet	GCGGCGGCGGCGGTGGTGGAGGCGGCGGTGGCGGTGGAAC	GCGGCGGCGGCGGTGGAGGAGGCGGCGGTGGCGGTGGAAC	-3	-3	0	0	0	0
chrX:53117279-53117309	rs79703928	chrX	53117302	53117303	G	A	snv	commonSome,commonAll,	0.0643821	TSPYL2	+	0.00152164	NM_022117	-45	-392	utr3	2-quartet	ATTGCAGAGTTCTTATTTTGGGGGGAGGGAAAGGGGGCTA	ATTGCAGAGTTCTTATTTTGGGGGGAGGAAAAGGGGGCTA	2.2	1.2	0	0	0	0
chr1:19234097-19234127	rs28515791	chr1	19234102	19234103	G	A	snv	commonSome,rareSome,	0.0644968	IFFO2	-	0.000239945	NM_001136265	-81	-3298	utr3	PQs_7	TTCCGGACCTCTGGGTTCAGGGCGGGGGCGGAGGGATCCT	TTCCGGACCTCTGGGTTCAGGGCGGGGGTGGAGGGATCCT	-1.4	-1.4	1	1	1	1
chr17:421255-421285	rs145221578	chr17	421261	421262	T	C	snv	commonSome,commonAll,	0.065	VPS53	-	6.62839e+09	NM_001128159	-1096	-2924	utr3	Others	CCTGTAGTCGCAACACTTTGGGAGACCAAGGCAGGAGGAT	CCTGTAGTCGCAACACTTTGGGAGACCGAGGCAGGAGGAT	-5.2	-4	1	1	0	0
chr6:53362774-53362804	rs17881548	chr6	53362786	53362787	G	A	snv	commonSome,commonAll,overlapDiffClass,	0.0650943	GCLC	-	9.36351e+07	NM_001498	-148	154	utr3	2-quartet	TTTTTTAACTAAAAAAGTTGGCGGCAGGGGTGGGGGGTGG	TTTTTTAACTAAAAAAGTTGGTGGCAGGGGTGGGGGGTGG	-1.5	-1.5	1	1	0	0
chr17:37076413-37076443	rs117437224	chr17	37076433	37076434	C	T	snv	commonSome,rareSome,overlapDiffClass,	0.0654206	LASP1	+	2.75973e+09	NM_006148	-168	-1554	utr3	2-quartet	GGGTCTGCAGCCTGCTGGGGCTAAGCGGTGGAGGAAGGCT	GGGTCTGCAGCCTGCTGGGGCTAAGTGGTGGAGGAAGGCT	-2.3	-2.1	0	0	0	0
chr17:53046017-53046047	rs573013750	chr17	53046023	53046024	A	C	snv	commonSome,commonAll,overlapDiffClass,	0.0655365	COX11	-	0.0042566	NM_004375	-1524	-1611	utr5	Others	ACCTCTCGTCCCTGAGAGGCGGGTGGGTGTTAGTTCAGAG	ACCTCTCGTCCCTGAGAGGCGGGTGGGGGTTAGTTCAGAG	-4	-4	0	0	0	0
chr2:36583445-36583475	rs3821169	chr2	36583460	36583461	G	T	snv	commonSome,rareSome,	0.0658946	CRIM1	+	0.00249687	NM_016441	-3263	-5374	cds	bulge	CTTGGTGGCGGGGGACAGGGGGTTGGCCGGCTGCGGGCAC	CTTGGTGGCGGGGGACAGGGTGTTGGCCGGCTGCGGGCAC	-2.8	-2.8	1	1	0	0
chr16:72817173-72817203	rs3751849	chr16	72817193	72817194	C	G	snv	commonSome,rareSome,	0.0662939	ZFHX3	-	3.1566e+09	NM_001164766	1	-366	utr3	bulge	TTACTTTCTTCAGGGGGGAGGGGGGCAAGTTTGGGTAGGA	TTACTTTCTTCAGCGGGGAGGGGGGCAAGTTTGGGTAGGA	1.6	1.5	0	0	0	0
chr17:37903234-37903264	rs12942343	chr17	37903255	37903256	G	A	snv	commonSome,rareSome,	0.0666933	GRB7	+	0.00039274	NM_005310	-217	-252	utr3	long_loop	CGCGGCCACAGGGGACGGGATGAGGAGCGGGAGGGTTCCG	CGCGGCCACAGGGGACGGGATGAGGAACGGGAGGGTTCCG	-4.5	-4.1	0	0	0	0
chr10:27400364-27400394	rs4749227	chr10	27400387	27400388	G	A	snv	commonSome,rareSome,	0.066893	YME1L1	-	0.000594258	NM_014263	174	-954	utr3	2-quartet	GTAATCCCAGCACTTTTGGAGGCTGAGGCGGGTGGATTGC	GTAATCCCAGTACTTTTGGAGGCTGAGGCGGGTGGATTGC	-2.5	-1	0	0	0	0
chr10:27400364-27400394	rs147349217	chr10	27400388	27400389	C	T	snv	commonSome,rareSome,	0.066893	YME1L1	-	0.000594258	NM_014263	174	-954	utr3	2-quartet	GTAATCCCAGCACTTTTGGAGGCTGAGGCGGGTGGATTGC	GTAATCCCAACACTTTTGGAGGCTGAGGCGGGTGGATTGC	-2.5	-1.7	0	0	0	0
chr12:104324238-104324268	rs17797090	chr12	104324265	104324266	G	A	snv	commonSome,rareSome,	0.066893	HSP90B1	+	1.95233e+09	NM_003299	-2474	-2682	utr5	2-quartet	GTGGGGGGTGGAGGCGGCTCCTGCGATCGAAGGGGACTTG	GTGGGGGGTGGAGGCGGCTCCTGCGATCGAAGAGGACTTG	-1.2	-0.5	1	1	0	0
chr17:53046017-53046047	rs565209851	chr17	53046027	53046028	A	C	snv	commonSome,commonAll,overlapDiffClass,	0.0671398	COX11	-	0.0042566	NM_004375	-1524	-1611	utr5	Others	ACCTCTCGTCCCTGAGAGGCGGGTGGGTGTTAGTTCAGAG	ACCTCTCGTCCCTGAGAGGCGGGGGGGTGTTAGTTCAGAG	-4	-4	0	0	0	0
chr19:13249912-13249942	rs117922601	chr19	13249920	13249921	G	T	snv	commonSome,commonAll,	0.0676339	NACC1	+	0.00761854	NM_052876	-110	-1994	utr3	long_loop	GGGGGGTCTCCTGGGGGCAGACCGAGGGTCTCGGAGGATA	GGGGGGTCTCCTGTGGGCAGACCGAGGGTCTCGGAGGATA	-3.6	-3.1	1	1	0	0
chr16:2035986-2036016	rs1802834	chr16	2035998	2035999	C	T	snv	clinvar,clinvarBenign,commonSome,commonAll,	0.0681827	GFER	+	0.00450099	NM_005262	-95	-78	cds	2-quartet	GTGGATGAGCGCTGGCGCGACGGCTGGAAGGATGGCTCCT	GTGGATGAGCGCTGGCGTGACGGCTGGAAGGATGGCTCCT	-1.7	-1.7	0	0	0	0
chr15:91185836-91185866	rs78300345	chr15	91185861	91185862	G	A	snv	commonSome,rareSome,	0.0682907	CRTC3	+	0.0131225	NM_022769	88	-2680	utr3	2-quartet	GACCTGACCCAGAGGGCGAGGCCCTCCAGCGGGGGACATT	GACCTGACCCAGAGGGCGAGGCCCTCCAGCAGGGGACATT	-7.8	-7.8	2	2	0	0
chr7:102715334-102715364	rs7797873	chr7	102715349	102715350	G	C	snv	commonSome,commonAll,	0.0686901	ARMC10	+	0.00333494	NM_001161009	-1372	-2469	utr5	2-quartet	CGCCCCGCGCTCCGCTGCCAGGGGCGGGAGGGAGGAATGG	CGCCCCGCGCTCCGCTGCCACGGGCGGGAGGGAGGAATGG	-7.8	-5.9	0	0	0	0
chr17:3749387-3749417	rs12449334	chr17	3749410	3749411	T	G	snv	commonSome,rareSome,	0.0690895	C17orf85	-	0.0135256	NM_001114118	-1749	-2607	cds	2-quartet	GACCGTGGCGAGCCGGAGCCCATGGAGGTGGAGGAGGGCG	GACCGTGGCGCGCCGGAGCCCATGGAGGTGGAGGAGGGCG	-2.7	-3.5	0	0	0	0
chr13:113977039-113977069	rs9577506	chr13	113977049	113977050	G	C	snv	commonSome,commonAll,overlapDiffClass,	0.0692891	LAMP1	+	0.00269602	NM_005561	66	-652	utr3	long_loop	GGTGGGGGTGCCGCTGTCTCTGAGGGGTGGGGGTGCCGCT	GGTGGGGGTGCCGCTCTCTCTGAGGGGTGGGGGTGCCGCT	-2.3	-4.9	0	0	0	0
chr8:144999451-144999481	rs62642470	chr8	144999452	144999453	C	T	snv	clinvar,clinvarBenign,commonSome,commonAll,	0.0692891	PLEC	-	0.00518683	NM_201378	-9082	-10002	cds	2-quartet	CTGGAGGAGCTGCGGCTGCAGGCGGAGGAGGCGGAGCGGC	CTGGAGGAGCTGCGGCTGCAGGCGGAGGAGGCAGAGCGGC	-8.2	-7.3	0	0	0	0
chr11:119227115-119227145	rs45575236	chr11	119227140	119227141	G	A	snv	commonSome,rareSome,	0.0696885	USP2	-	0.0089072	NM_004205	-50	-145	utr3	Others	GACGCCCGCGCCGCGGAGGAGCCGGCGCCCATCTCCACCC	GACGCCCGTGCCGCGGAGGAGCCGGCGCCCATCTCCACCC	-11.6	-3.8	0	0	0	0
chr2:61293012-61293042	rs144135823	chr2	61293024	61293025	A	G	snv	commonSome,commonAll,	0.0696885	KIAA1841	+	0.00436861	NM_001129993	-3404	-4522	utr5	2-quartet	TCTCCGCAGCCGCCTGCAAGCGGGCGGGGGCGGGGTGTGA	TCTCCGCAGCCGCCTGCGAGCGGGCGGGGGCGGGGTGTGA	-7.1	-7.1	0	0	0	0
chr1:10093065-10093095	rs72859578	chr1	10093069	10093070	G	C	snv	commonSome,commonAll,overlapDiffClass,	0.0698882	UBE4B	+	1.03309e+09	NM_006048	-4552	-5410	utr5	long_loop	GTGGGGCGAGGGGGAAAGAGTAGGGGTGGAGGGGTAGGAG	GTGGGGCGACGGGGAAAGAGTAGGGGTGGAGGGGTAGGAG	3.9	1.8	0	0	0	0
chr22:45590872-45590902	rs41278911	chr22	45590898	45590899	A	G	snv	commonSome,rareSome,	0.0700935	KIAA0930	-	0.00440315	NM_001009880	741	827	utr3	2-quartet	TAAGGCATGTGAACAGGGCACGCGGTGGGCTGGTGGTTTC	TAAGGCACGTGAACAGGGCACGCGGTGGGCTGGTGGTTTC	-0.6	-1.9	1	1	0	0
chr19:44270817-44270847	rs12427	chr19	44270818	44270819	A	G	snv	commonSome,commonAll,	0.0704872	KCNN4	-	0.00861528	NM_002250	131	-98	utr3	2-quartet	CTGAAGAACTGGGTATGAGGCTGGGGCGGGGCTGGAGGTG	CTGAAGAACTGGGTATGAGGCTGGGGCGGGGCCGGAGGTG	0.5	-0.5	1	1	0	0
chr19:13265260-13265290	rs3745992	chr19	13265269	13265270	C	T	snv	commonSome,commonAll,	0.0706869	IER2	+	3.85268e+08	NM_004907	167	-409	utr3	2-quartet	CCTGGGGCGTGCACCCGCCCTGGGCAGTGGGGAGGAGAGT	CCTGGGGCGTGCACTCGCCCTGGGCAGTGGGGAGGAGAGT	-5.2	-5.4	0	0	0	0
chr2:209221284-209221314	rs6725527	chr2	209221290	209221291	T	G	snv	clinvar,clinvarBenign,commonSome,rareSome,	0.0710863	PIKFYVE	+	0.00131632	NM_015040	-512	-595	utr3	2-quartet	AGGCAGGAGAATTGTTTGAACCTGGGAGGCGGAGGCTGCA	AGGCAGGAGAAGTGTTTGAACCTGGGAGGCGGAGGCTGCA	-0.6	-0.6	1	1	0	0
chr12:50794738-50794768	rs575463540	chr12	50794767	50794768	A	G	snv	commonSome,commonAll,	0.0712859	LARP4	+	0.000886462	NM_052879	-2363	-6321	utr5	2-quartet	GGGCCTGTGAGCCAGTTGGAGTTGCGGCGGCGGGAACGAT	GGGCCTGTGAGCCAGTTGGAGTTGCGGCGGCGGGGACGAT	-0.8	-0.8	0	0	0	0
chr14:23779861-23779891	rs3210043	chr14	23779876	23779877	C	A	snv	commonSome,commonAll,	0.0714856	BCL2L2	+	0.0112364	NM_001199839	-26	-1031	utr3	2-quartet	CAGAGCCAGCTTGTGGCAAGCAGTTGGGGTGGGGGGTCTC	CAGAGCCAGCTTGTGGCAAGAAGTTGGGGTGGGGGGTCTC	-3	-3.6	0	0	0	0
chr2:234380172-234380202	rs41264149	chr2	234380182	234380183	G	T	snv	commonSome,commonAll,	0.071875	DGKD	+	9.40922e+09	NM_152879	-132	-510	utr3	bulge	CAAGCTGGAACTTGGGTGGGGAGGGGACATGAGGAGGATA	CAAGCTGGAACTTGGTTGGGGAGGGGACATGAGGAGGATA	-1.2	-1.2	2	2	0	0
chr19:47906488-47906518	rs1880853	chr19	47906490	47906491	C	A	snv	commonSome,commonAll,	0.071885	MEIS3	-	0.000905102	NM_001009813	-8	-86	utr3	PQs_7	AAGGGACGGGGTGGCTGGGCAGTCAGGGAAGGAGGGTCGC	AAGGGACGGGGTGGCTGGGCAGTCAGGGAAGTAGGGTCGC	-2.1	-2.1	0	0	1	1
chr1:226033629-226033659	rs3738050	chr1	226033644	226033645	T	A	snv	commonSome,commonAll,	0.0722843	TMEM63A	-	0.0061644	NM_014698	621	-371	utr3	2-quartet	GGCACAAGCCTGTGCAGTAGGGGCGGGATGGGGGTGTGGA	GGCACAAGCCTGTGCAGTTGGGGCGGGATGGGGGTGTGGA	-3.6	-3.6	0	0	0	0
chr2:43453693-43453723	rs112694524	chr2	43453720	43453721	G	A	snv	commonSome,commonAll,	0.0726518	ZFP36L2	-	0.000495091	NM_006887	-1860	-3615	utr5	PQs_7	AGCTGCCGTCGGCTCCGCGGGGGGGGCGGGCCGGGCACCC	AGCTGCTGTCGGCTCCGCGGGGGGGGCGGGCCGGGCACCC	-9.5	-8	0	0	1	1
chr20:3628899-3628929	rs434222	chr20	3628917	3628918	C	T	snv	refIsMinor,commonSome,commonAll,	0.0728834	ATRN	+	0.00782931	NM_139321	0	-1099	utr3	2-quartet	AAAAGCACATGGAAAAAAATGGATGAGGAGGGAAAACTCT	AAAAGCACATGGAAAAAAATGGACGAGGAGGGAAAACTCT	0.3	0.3	1	1	0	0
chr5:112203713-112203743	rs2900065	chr5	112203742	112203743	G	T	snv	commonSome,rareSome,	0.0728834	SRP19	+	2.83859e+07	NM_003135	-94	122	utr3	bulge	CTGTGGTAGGTCCTTTTGTGGGTGGGGGACAGGGGAGTCT	CTGTGGTAGGTCCTTTTGTGGGTGGGGGACAGGGTAGTCT	-0.4	-0.4	1	1	0	0
chr6:33541147-33541177	rs5745598	chr6	33541167	33541168	A	G	snv	commonSome,commonAll,	0.0730831	BAK1	-	5.03198e+07	NM_001188	-197	-797	utr3	2-quartet	AGGCCAGGACGTCTGGGGTGTGGGGATTGGTGGGTCTATG	AGGCCAGGACGTCCGGGGTGTGGGGATTGGTGGGTCTATG	-2.1	-2.2	0	0	0	0
chr17:55183766-55183796	rs35359994	chr17	55183791	55183792	G	A	snv	commonSome,commonAll,overlapDiffClass,	0.0735121	AKAP1	+	0.00918331	NM_003488	-1769	-2740	cds	G_40	AATGAGGAGGGCTTGGATAGAAATGAGGAGGGCTTGGATA	AATGAGGAGGGCTTGGATAGAAATGAGGAGAGCTTGGATA	1.5	1.3	0	0	0	0
chr19:42882090-42882120	rs77151871	chr19	42882094	42882095	G	A	snv	commonSome,commonAll,	0.0736821	MEGF8	+	0.00807669	NM_001410	457	-778	utr3	2-quartet	ATAAATGATGGTGTGGATGTCAGGGTGAGGGAGGAGACAA	ATAAATGATAGTGTGGATGTCAGGGTGAGGGAGGAGACAA	-0.2	-0.2	1	1	0	0
chr5:148731198-148731228	rs783777	chr5	148731217	148731218	G	A	snv	commonSome,commonAll,	0.0738818	GRPEL2	+	0.00430177	NM_152407	156	87	utr3	2-quartet	ATCTTGTATTTTGTGGAAAAAGGAGATGGTAGGGATTGGT	ATCTTGTATTTTGTGGAAAAAGGAAATGGTAGGGATTGGT	-0.5	-0.3	0	0	0	0
chr2:219140002-219140032	rs12612648	chr2	219140014	219140015	G	A	snv	commonSome,rareSome,	0.0740741	TMBIM1	-	0.00776753	NM_022152	-1034	-1047	utr3	bulge	TGTGTGGGTACTTGGTGGGGACGGAGGAGCTAGGGACTAA	TGTGTGGGTACTTGGTGGGGATGGAGGAGCTAGGGACTAA	-0.4	-0.4	1	1	0	0
chr9:95087797-95087827	rs41277649	chr9	95087809	95087810	A	C	snv	commonSome,commonAll,	0.0745536	CENPP	+	0.00484626	NM_001012267	-1446	-1480	utr5	Others	GCAAAAGAGCCTAAACCAAAATCCCCTAGTTTCTATTGAA	GCAAAAGAGCCTAAACCCAAATCCCCTAGTTTCTATTGAA	-0.2	-0.2	1	1	0	0
chr2:131809431-131809461	rs3814393	chr2	131809435	131809436	A	T	snv	commonSome,commonAll,	0.0746805	FAM168B	-	9.34634e+09	NM_001009993	-127	-3955	utr3	bulge	ACTGACTGTCCTGGGAGGGAGTTGCGAGGTTTGGGAGAGA	ACTGACTGTCCTGGGAGGGAGTTGCGAGGATTGGGAGAGA	-0.5	-0.5	1	1	0	0
chr21:45404559-45404589	rs200193131	chr21	45404573	45404574	T	G	snv	commonSome,commonAll,overlapDiffClass,	0.0746805	AGPAT3	+	1.95145e+09	NM_020132	21	20	utr3	2-quartet	TGTTTGAATTTTTTTTTTTTGGGGGGGGGAGGGTGGATTT	TGTTTGAATTTTTTTTTTTGGGGGGGGGGAGGGTGGATTT	1.9	1.9	0	0	0	0
chr2:183902915-183902945	rs112105579	chr2	183902942	183902943	G	T	snv	commonSome,commonAll,overlapDiffClass,	0.0755208	NCKAP1	-	7.35939e+08	NM_013436	-3533	-4262	utr5	bulge	CGCTCTCCTAAGGCGGAGGTCGCGGGCGGGAGGGGAGGAG	CGCTCTACTAAGGCGGAGGTCGCGGGCGGGAGGGGAGGAG	-4.7	-2.6	0	0	0	0
chr2:239972050-239972080	rs74759164	chr2	239972079	239972080	T	A	snv	commonSome,commonAll,	0.076278	HDAC4	-	0.000759592	NM_006037	272	-1641	utr3	Others	CTGCATAGCCCTCTGGGGATCCTGCCACCTGCCCTCTTAC	CTGCTTAGCCCTCTGGGGATCCTGCCACCTGCCCTCTTAC	-0.9	-0.9	0	0	0	0
chr14:53619890-53619920	rs1105538	chr14	53619895	53619896	G	A	snv	commonSome,rareSome,	0.0764776	DDHD1	-	0.00849165	NM_001160148	-2910	-3492	utr5	long_loop	AAAGATTAGAAACTTCGGGTGGAGAGGGCGGCGGCGTTGA	AAAGATTAGAAACTTCGGGTGGAGAGGGTGGCGGCGTTGA	0.5	0.4	1	1	0	0
chr9:117407225-117407255	rs147946774	chr9	117407252	117407253	T	G	snv	commonSome,commonAll,	0.0764776	C9orf91	+	0.00481169	NM_153045	322	-1427	utr3	Others	TGTGCACCACTACTCCTGGATATTTTTTTGTGTTTTTAGT	TGTGCACCACTACTCCTGGATATTTTTTTGTGGTTTTAGT	0.5	-1.5	0	0	0	0
chr15:79237277-79237307	rs2289702	chr15	79237292	79237293	C	T	snv	commonSome,commonAll,overlapDiffClass,	0.076877	CTSH	-	0.0145707	NM_004390	-1164	-1294	cds	G_40	CTGCCGCTGCTCTGCGCCGGGGCCTGGCTCCTGGGAGTCC	CTGCCGCTGCTCTGCGCCAGGGCCTGGCTCCTGGGAGTCC	-5	-5.9	0	0	0	0
chr1:153932241-153932271	rs6413529	chr1	153932269	153932270	C	T	snv	commonSome,commonAll,	0.0769065	SLC39A1	-	2.88998e+08	NM_014437	181	-635	utr3	2-quartet	ATAAGGACAGGCTCACATGGGAGGCTGGAGGTGGGTACCC	ATAAGAACAGGCTCACATGGGAGGCTGGAGGTGGGTACCC	-5.6	-5.6	1	1	0	0
chr1:87211924-87211954	rs10489890	chr1	87211939	87211940	A	C	snv	commonSome,rareSome,	0.0772764	SH3GLB1	+	0.000925994	NM_016009	206	-1893	utr3	bulge	AACTGTGGAGTGGAGAAGACAATGGAGGGCAAGGCAAAAA	AACTGTGGAGTGGAGAAGACCATGGAGGGCAAGGCAAAAA	0.4	-0.3	1	1	0	0
chr1:214526424-214526454	rs61821363	chr1	214526426	214526427	T	C	snv	commonSome,commonAll,	0.077476	PTPN14	-	2.61671e+09	NM_005401	1783	-4358	utr3	bulge	ATCCCTTGAGGTGCGGGGGTTGGGGGGATGGAGGGTACAG	ATCCCTTGAGGTGCGGGGGTTGGGGGGATGGGGGGTACAG	-1.5	-1.5	0	0	0	0
chr10:27149892-27149922	rs2296544	chr10	27149907	27149908	G	A	snv	commonSome,rareSome,	0.077476	ABI1	-	1.03301e+09	NM_001178121	-1512	-1808	utr5	2-quartet	GGTGCCGTCCCACAATACCAGGCGGGAGGGCGGGTAGGCG	GGTGCCGTCCCACAATACTAGGCGGGAGGGCGGGTAGGCG	-6.1	-6.1	0	0	0	0
chr16:87864250-87864280	rs16943300	chr16	87864268	87864269	G	A	snv	commonSome,commonAll,	0.077476	SLC7A5	-	3.67545e+08	NM_003486	-540	-601	utr3	2-quartet	GGGTGGGAGCTCCTCCGCAGAAGGTTGGTGGGGGGTCCAG	GGGTGGGAGCTCCTCTGCAGAAGGTTGGTGGGGGGTCCAG	-3	-0.8	0	0	0	0
chr7:127732266-127732296	rs77477908	chr7	127732267	127732268	G	A	snv	commonSome,rareSome,	0.0778754	SND1	+	0.000135908	NM_014390	44	-325	utr3	PQs_7	GGCTGCGGGGTGGGGACCCCAAGGCTTTCTGGGGCAGACC	GGCTGCAGGGTGGGGACCCCAAGGCTTTCTGGGGCAGACC	-4.2	-4	2	2	0	0
chr17:41478364-41478394	rs57953518	chr17	41478386	41478387	G	A	snv	commonSome,rareSome,overlapDiffClass,	0.0786741	ARL4D	+	0.00028667	NM_001661	120	77	utr3	bulge	AGATTTCTATATGGGGTTGTGGCGCAGGGGGAGGGAGATT	AGATTTCTATATGGGGTTGTGGCGCAGAGGGAGGGAGATT	0.9	0.9	0	0	0	0
chr16:87865994-87866024	rs75898183	chr16	87865996	87865997	C	T	snv	commonSome,commonAll,	0.0787946	SLC7A5	-	129777	NM_003486	99	-2345	utr3	PQs_7	CTCAGCCGTAGGGTGGCACTGGGAGGGGGTGGGGGATCTG	CTCAGCCGTAGGGTGGCACTGGGAGGGGGTGAGGGATCTG	-4.4	-4.4	0	0	1	1
chr15:89173908-89173938	rs67426590	chr15	89173937	89173938	G	A	snv	commonSome,rareSome,overlapDiffClass,	0.0788738	AEN	+	0.000196567	NM_022767	-69	-1552	utr3	2-quartet	ATCATATCATCCTCTCTGGGGATGGTGGGTGGGGGTGTCA	ATCATATCATCCTCTCTGGGGATGGTGGGTGGGGATGTCA	-2.1	-2.1	0	0	0	0
chr17:48785032-48785062	rs12601696	chr17	48785038	48785039	C	T	snv	commonSome,commonAll,overlapDiffClass,	0.0789751	ANKRD40	-	0.0132866	NM_052855	-1174	-2242	utr5	PQs_7	CGGGCGGGGCGGGGCAGGCGGGCCTGGGCGGGGGCCTGGG	CGGGCGGGGCGGGGCAGGCGGGCCTGGACGGGGGCCTGGG	-3.5	-3.5	0	0	1	1
chr17:41478364-41478394	rs61604636	chr17	41478365	41478366	C	G	snv	commonSome,rareSome,	0.0790735	ARL4D	+	0.00028667	NM_001661	120	77	utr3	bulge	AGATTTCTATATGGGGTTGTGGCGCAGGGGGAGGGAGATT	AGATTTGTATATGGGGTTGTGGCGCAGGGGGAGGGAGATT	0.9	0.9	0	0	0	0
chr10:112658021-112658051	rs1052550	chr10	112658026	112658027	T	C	snv	commonSome,commonAll,overlapDiffClass,	0.0792732	PDCD4	+	0.00375638	NM_014456	-36	142	utr3	2-quartet	TCTTTTTTTTTTGTTTTTCGAGGGGGCAAGGAGGGACAGA	TCTTTTTTTTCTGTTTTTCGAGGGGGCAAGGAGGGACAGA	1.6	-0.5	1	1	0	0
chr3:12962057-12962087	rs35319679	chr3	12962073	12962074	G	A	snv	commonSome,commonAll,	0.0798722	IQSEC1	-	0.00448723	NM_001134382	-3093	-5191	cds	Others	GCTACTGCATCTGCAACCCTGGGGTGGTGCGGCAATTCCG	GCTACTGCATCTGCAACTCTGGGGTGGTGCGGCAATTCCG	-2.1	-2.1	0	0	0	0
chr13:28867537-28867567	rs74043705	chr13	28867562	28867563	G	A	snv	commonSome,commonAll,overlapDiffClass,	0.0800719	PAN3	+	0.0132269	NM_175854	-26	-1884	utr3	2-quartet	TTTTTTTTTTTTTTTTTTTTTGGGCGGGGGGGAGGTTTAT	TTTTTTTTTTTTTTTTTTTTTGGGCGGGGGAGAGGTTTAT	1600	1600	0	0	0	0
chr11:18505527-18505557	rs2279901	chr11	18505551	18505552	G	A	snv	commonSome,rareSome,	0.081869	TSG101	-	0.00773772	NM_006292	-608	-657	cds	2-quartet	GGTCAGTGACAAACTGAGATGGCGGATGAAGGAGGAAATG	GGTCAGTGATAAACTGAGATGGCGGATGAAGGAGGAAATG	-2.9	-2.9	1	1	0	0
chr3:196197392-196197422	rs112385327	chr3	196197418	196197419	A	G	snv	commonSome,commonAll,	0.0835496	RNF168	-	0.0128392	NM_152617	976	1234	utr3	bulge	GTCCAGATGAGGATGAGGCTGAGGCTGGATGGGGTGACTG	GTCCAGACGAGGATGAGGCTGAGGCTGGATGGGGTGACTG	-1.3	-1.3	1	1	0	0
chr1:224575852-224575882	rs11809710	chr1	224575873	224575874	C	A	snv	commonSome,rareSome,overlapDiffClass,	0.0844649	WDR26	-	8.79879e+08	NM_025160	380	-282	utr3	bulge	TTCTTCCATTGTGGGGTAGGTGGTCGGGGATGGGAGAAAG	TTCTTCCATTGTTGGGTAGGTGGTCGGGGATGGGAGAAAG	-4.1	-4.1	0	0	0	0
chr5:89769702-89769732	rs2162986	chr5	89769727	89769728	C	T	snv	refIsMinor,commonSome,rareSome,	0.0849673	MBLAC2	-	0.0152388	NM_203406	-520	-1607	cds	G_40	TGGTGCGGACGCCCAGCCCCGGCTGGAGGGCCAGACAGTT	TGGTGCGGGCGCCCAGCCCCGGCTGGAGGGCCAGACAGTT	-3.3	-6.1	1	1	0	0
chr17:56083766-56083796	rs528540802	chr17	56083776	56083777	A	C	snv	commonSome,rareSome,	0.0854633	SRSF1	-	4.53905e+07	NM_006924	-463	-2321	cds	2-quartet	ACAGGCCGAGGCGGCGGCGGGGGTGGAGGTGGCGGAGCTC	ACAGGCCGAGGCGGCGGCGGGGGGGGAGGTGGCGGAGCTC	-3.1	-3.1	0	0	0	0
chr3:47894091-47894121	rs1875103	chr3	47894100	47894101	C	T	snv	commonSome,commonAll,	0.0855075	MAP4	-	3.05061e+08	NM_002375	-86	-1878	utr3	bulge	ACTGCTCCGTGGAGGAGGTTGGGAGGGGGTTGGGGTGGTT	ACTGCTCCGTGGAGGAGGTTGGGAAGGGGTTGGGGTGGTT	-2.8	-2.8	0	0	0	0
chr12:121867814-121867844	rs1138515	chr12	121867828	121867829	G	A	snv	commonSome,commonAll,	0.0858626	KDM2B	-	0.00632361	NM_032590	0	-106	utr3	2-quartet	TACAAGAAGACATTCCTGTCGGAGAGGAGGGTGGACTTCG	TACAAGAAGACATTCCTGTTGGAGAGGAGGGTGGACTTCG	-3	-3	2	2	0	0
chr8:145692372-145692402	rs2250891	chr8	145692384	145692385	T	C	snv	refIsMinor,commonSome,rareSome,overlapDiffClass,	0.0858626	KIFC2	+	0.00261791	NM_145754	-2484	-2924	cds	2-quartet	GAAGGCGCAGCCGAGGGCCGCGCGGCCGCGGTGTCCCTGG	GAAGGCGCAGCCGAGGGTCGCGCGGCCGCGGTGTCCCTGG	-8.5	-8.4	0	0	0	0
chr4:158092713-158092743	rs72685584	chr4	158092732	158092733	T	C	snv	clinvar,clinvarBenign,commonSome,commonAll,	0.086262	GLRB	+	0.00411454	NM_000824	30	-76	utr3	Others	GGAATGCAGTAATAGATATGTGATTTTACATCATTTTTAA	GGAATGCAGTAATAGATATGTGATCTTACATCATTTTTAA	-0.7	-1	0	0	0	0
chr10:65383516-65383546	rs200900078	chr10	65383518	65383519	G	A	snv	commonSome,commonAll,overlapDiffClass,	0.0866613	REEP3	+	0.0133808	NM_001001330	86	-1320	utr3	Others	TATATGTGTGTGTGTGTGTGTGTGTGTGTGTGTGTGTGTG	TATATGTATGTGTGTGTGTGTGTGTGTGTGTGTGTGTGTG	1600	2.4	0	0	0	0
chr19:14629157-14629187	rs34966794	chr19	14629170	14629171	C	T	snv	commonSome,commonAll,	0.0878594	DNAJB1	-	0.000134456	NM_006145	-1036	-2166	cds,utr5	long_loop	CAGCGGGTCGGCGGGCCGCAGGAGGGGGTCATGGGTAAAG	CAGCGGGTCGGCGGGCCGCAAGAGGGGGTCATGGGTAAAG	-1.3	-0.9	0	0	0	0
chr19:7978402-7978432	rs4804835	chr19	7978406	7978407	G	A	snv	commonSome,commonAll,overlapDiffClass,	0.0884585	MAP2K7	+	0.000555894	NM_145185	-268	-908	utr3	PQs_7	GTGGGGGCCGGGCTGAGGGTGGGGGTGCGAGGTGGTCACT	GTGGGGGCCAGGCTGAGGGTGGGGGTGCGAGGTGGTCACT	0.8	0.2	0	0	1	0
chr6:117996795-117996825	rs9767451	chr6	117996817	117996818	C	T	snv	refIsMinor,commonSome,commonAll,	0.0902556	NUS1	+	0.00904264	NM_138459	-951	-4480	utr5	PQs_7	GAGTGGGCGGGAGGGAGAGGGGGTGTCTGAGGGCCACAAG	GAGTGGGCGGGAGGGAGAGGGGGTGTCCGAGGGCCACAAG	0.6	-2.9	0	0	1	1
chr3:133307594-133307624	rs9824964	chr3	133307599	133307600	C	T	snv	commonSome,commonAll,	0.090655	CDV3	+	1.28963e+07	NM_001134423	186	-1461	utr3	long_loop	AACTGGGGTCCACCAAGTGGGGGAAGGGGAAGGGAGAGAA	AACTGGGGTCTACCAAGTGGGGGAAGGGGAAGGGAGAGAA	-3.8	-3.8	0	0	0	0
chr11:2418310-2418340	rs1049390	chr11	2418336	2418337	A	G	snv	commonSome,rareSome,	0.0908546	CD81	+	8.20785e+08	NM_004356	-227	-261	utr3	PQs_7	AGACGGGCCTGGGTCTTGGGGACTGGAGGGCAGGGGTCCT	AGACGGGCCTGGGTCTTGGGGACTGGAGGGCGGGGGTCCT	-1.1	-1.1	1	1	1	1
chr1:11721925-11721955	rs2294640	chr1	11721948	11721949	C	T	snv	commonSome,commonAll,	0.0920527	FBXO44	+	0.00970057	NM_183412	152	-371	utr3	long_loop	CAGACCCAGGGTGGGGTGGGGTCCAGGTCGGGTGTGGACT	CAGACCCAGGGTGGGGTGGGGTCCAGGTTGGGTGTGGACT	-3.7	-5.3	2	2	0	0
chr19:663124-663154	rs192291082	chr19	663130	663131	C	T	snv	commonSome,rareSome,overlapDiffClass,	0.0934505	RNF126	-	0.00214068	NM_194460	-1206	-1235	utr5	2-quartet	GCGGGGGGCGGGCGGCGCGGAGTAGGTGGCGGCGGCCATG	GCGGGGGGCGGGCGGCGCGGAGTAGGTAGCGGCGGCCATG	-11.3	-11.6	0	0	0	0
chr12:53581369-53581399	rs3101059	chr12	53581375	53581376	C	T	snv	commonSome,commonAll,	0.0936502	ZNF740	+	0.000240762	NM_001004304	0	-3177	cds,utr3	bulge	TTCTCTATAGGCGCAAGGGGCCCCGGGTGGTGGGAGTGAT	TTCTCTATAGGTGCAAGGGGCCCCGGGTGGTGGGAGTGAT	-2.7	-2.8	0	0	0	0
chr19:811198-811228	rs6698	chr19	811222	811223	G	A	snv	commonSome,rareSome,overlapDiffClass,	0.0944489	PTBP1	+	1.03046e+08	NM_002819	36	-972	utr3	PQs_7	CCCGGGGTGTCCTGGGGACCCAAGGGGTGGGGGGGTCACA	CCCGGGGTGTCCTGGGGACCCAAGGGGTGAGGGGGTCACA	-5.7	-5.7	1	1	1	1
chr19:46053557-46053587	rs79317386	chr19	46053559	46053560	C	T	snv	clinvar,clinvarBenign,commonSome,commonAll,	0.0944489	OPA3	-	0.00823694	NM_025136	2918	-1124	utr3	bulge	TTGGGAAGCTGCAGGTGAAAGTGGGAGGGCCGGGCTTTCC	TTGGGAAGCTGCAGGTGAAAGTGGGAGGGCCAGGCTTTCC	-3	-3	0	0	0	0
chr5:141318353-141318383	rs59478686	chr5	141318367	141318368	C	T	snv	commonSome,rareSome,	0.0944489	KIAA0141	+	0.000760227	NM_014773	-878	-411	utr3	2-quartet	TGCCTCTTAGGGGCCAGAGCGGGCAGGAGGTTGGATAACA	TGCCTCTTAGGGGCCAGAGTGGGCAGGAGGTTGGATAACA	-2.3	-2.3	1	1	0	0
chr14:70498113-70498143	rs45542132	chr14	70498140	70498141	G	A	snv	commonSome,commonAll,overlapDiffClass,	0.0955259	SMOC1	+	131392	NM_022137	739	816	utr3	PQs_7	AGTGGCTATCACAGGCCTGGGTGGGTGGGTTGGGGGAGGT	AGTGGCTATCACAGGCCTGGGTGGGTGGGTTGAGGGAGGT	-0.5	-0.5	0	0	1	1
chr4:76649917-76649947	rs2280095	chr4	76649923	76649924	G	C	snv	refIsMinor,commonSome,commonAll,	0.095647	USO1	+	0.000717424	NM_003715	-3088	-3052	utr5	long_loop	CGGGATTGGGGCCCAGGCCCTGCGGAGGGCGGGGGAAGTT	CGGGATTGGGGGCCAGGCCCTGCGGAGGGCGGGGGAAGTT	-6	-6	0	0	0	0
chr10:70883996-70884026	rs5030909	chr10	70884012	70884013	G	A	snv	commonSome,commonAll,overlapDiffClass,	0.0974441	VPS26A	+	0.000145987	NM_004896	-1111	-1424	utr5	2-quartet	GAAGAGGAGTGGAGTAGGGGGGACGCGGCGGCGGCGTTGA	GAAGAGGAGTGGAGTAGGGGGAACGCGGCGGCGGCGTTGA	-4.7	-5.7	0	0	0	0
chr17:78083783-78083813	rs1800305	chr17	78083790	78083791	C	T	snv	clinvar,clinvarBenign,commonSome,commonAll,	0.0982428	GAA	+	0.000287945	NM_001079803	-1975	-1990	cds	2-quartet	CTACAGGCCCTACGACGAGGGTCTGCGGAGGGGGGTTTTC	CTACAGGCCCTATGACGAGGGTCTGCGGAGGGGGGTTTTC	-7	-7	0	0	0	0
chr10:72060979-72061009	rs10999250	chr10	72060998	72060999	C	T	snv	commonSome,rareSome,	0.0992412	LRRC20	-	0.00126786	NM_018205	-305	-2227	utr3	PQs_7	GGGGCGGGTGGGCCGAGCAGCACGTGGTGGGTGGGGTGCA	GGGGCGGGTGGGCCAAGCAGCACGTGGTGGGTGGGGTGCA	-1.1	-1.1	0	0	0	0
chr8:125564621-125564651	rs3829033	chr8	125564641	125564642	A	T	snv	commonSome,commonAll,	0.0998403	MTSS1	-	8.36707e+09	NM_014751	35	427	utr3	PQs_7	ACTGTGTTGGGATTGGGGGGAGGGCCATGGGAGGGGTACA	ACTGTGTTGGGATAGGGGGGAGGGCCATGGGAGGGGTACA	0.8	0.8	0	0	1	1
chr6:11136255-11136285	rs12205389	chr6	11136256	11136257	G	T	snv	commonSome,commonAll,overlapDiffClass,	0.100439	C6orf228	+	6.57931e+08	NM_001135575	149	230	utr3	2-quartet	TTTTGGGGGGGAGGGGGTAACCAAGATTTCAGGGTAGTAA	TTTTGGTGGGGAGGGGGTAACCAAGATTTCAGGGTAGTAA	-1	-1.4	1	1	0	0
chr2:154334086-154334116	rs1052581	chr2	154334105	154334106	C	T	snv	commonSome,commonAll,	0.100839	RPRM	-	2.71085e+08	NM_019845	-125	-211	utr3	PQs_7	TTTTGTCATTGTGGGAGAAGGGGTGGGGGGAGGGGGAGCC	TTTTGTCATTGTGGAAGAAGGGGTGGGGGGAGGGGGAGCC	-0.1	1.2	0	0	1	0
chrX:79932396-79932426	rs140852252	chrX	79932416	79932417	A	G	snv	clinvar,clinvarBenign,commonSome,rareSome,	0.101351	BRWD3	-	0.000614531	NM_153252	-389	-294	cds	bulge	GTCGAGGAAGAGGTGGAGGTGGCACTAGGGGGAGGGGAAG	GTCGAGGAAGAGGCGGAGGTGGCACTAGGGGGAGGGGAAG	1.5	1.1	0	0	0	0
chr20:42741676-42741706	rs45602132	chr20	42741692	42741693	C	T	snv	commonSome,commonAll,overlapDiffClass,	0.101637	JPH2	-	0.00671801	NM_020433	88	-1317	utr3	PQs_7	GGCTGAGGCCTCCCAGGGAAGCTGGGTGGGGTGGGTGTTG	GGCTGAGGCCTCCCAGGAAAGCTGGGTGGGGTGGGTGTTG	-4.1	-4.1	0	0	1	0
chr20:33299797-33299827	rs3746454	chr20	33299804	33299805	G	C	snv	commonSome,rareSome,overlapDiffClass,	0.101852	TP53INP2	+	0.00374771	NM_021202	-207	-1391	utr3	PQs_7	CAGGCCTCATGGGGGGTATGTGGGGAAGGGATGGGGTATC	CAGGCCTCATGGCGGGTATGTGGGGAAGGGATGGGGTATC	-2.1	-2.1	0	0	1	1
chr14:96671197-96671227	rs5223	chr14	96671221	96671222	G	T	snv	commonSome,commonAll,overlapDiffClass,	0.103634	BDKRB2	+	1.05254e+09	NM_000623	-2195	-3917	utr5	long_loop	TGGGCTCCGAGGAGGGGTGGGGACGGTGGGGACGGTGGGG	TGGGCTCCGAGGAGGGGTGGGGACGGTGGTGACGGTGGGG	-1.4	-2.1	0	0	1	0
chr12:132195656-132195686	rs7134849	chr12	132195673	132195674	C	A	snv	refIsMinor,commonSome,rareSome,	0.104233	SFSWAP	+	0.000110019	NM_004592	-3098	-3161	utr5	bulge	GGCGGCGGTGTTGAGGTTGGGTACGGGATGCGGGGTCTTT	GGCGGCGGTGTTGAGGTTGGGTCCGGGATGCGGGGTCTTT	1.3	0.3	0	0	0	0
chr1:201104552-201104582	rs11540083	chr1	201104555	201104556	C	A	snv	commonSome,commonAll,	0.104633	TMEM9	-	4.06369e+09	NM_016456	-461	-630	utr3	PQs_7	TGTCTTCTTGGGTCTTTGGGGTTGAAGGGAGGGGGAAGGC	TGTCTTCTTGGGTCTTTGGGGTTGAAGGGATGGGGAAGGC	0.8	0.8	0	0	1	1
chr1:36031839-36031869	rs12046738	chr1	36031859	36031860	G	T	snv	commonSome,rareSome,overlapDiffClass,	0.104832	NCDN	+	2.03167e+09	NM_001014839	0	-487	utr3	long_loop	GCAACCTGGGGCAGACAGGCCTGGTGGGGGGTGGGGAAAC	GCAACCTGGGGCAGACAGGCCTGGTTGGGGGTGGGGAAAC	-1.8	-4.3	1	1	0	0
chr22:24167502-24167532	rs2229354	chr22	24167512	24167513	G	A	snv	clinvar,clinvarBenign,commonSome,commonAll,	0.105232	SMARCB1	+	1.01526e+09	NM_001007468	-399	-544	cds	bulge	CCTGAAGCTGTGCTCGGAGCTGGGGTTGGGCGGGGAGTTT	CCTGAAGCTGTGCTCAGAGCTGGGGTTGGGCGGGGAGTTT	-0.8	-2.6	0	0	0	0
chr9:140196380-140196410	rs113579584	chr9	140196399	140196400	C	T	snv	commonSome,commonAll,overlapDiffClass,	0.106829	NRARP	-	0.0146407	NM_001004354	-1011	-1430	utr5	2-quartet	CCGGCCCGGCCCGCGGCCCGCGCCCGGCGGCAGCATGAGC	CCGGCCCGGCCCGCAGCCCGCGCCCGGCGGCAGCATGAGC	-10.1	-10.1	0	0	0	0
chr16:18847393-18847423	rs3816919	chr16	18847415	18847416	G	A	snv	commonSome,commonAll,	0.107628	SMG1	-	0.00109523	NM_015092	-3120	-7754	cds	Others	CAGAGGCGCTCCGTGCTCCGTGGCTGTCTGGAGCAACTGC	CAGAGGCGCTCTGTGCTCCGTGGCTGTCTGGAGCAACTGC	-4.5	-4.5	0	0	0	0
chr14:86091398-86091428	rs10145152	chr14	86091414	86091415	A	G	snv	refIsMinor,commonSome,commonAll,	0.108491	FLRT2	+	0.0083545	NM_013231	-62	678	utr3	Others	CGTAGAAAAGAGAGGATGTCCGTGCTTAATTCTAGATACT	CGTAGAAAAGAGAGGATGTCCATGCTTAATTCTAGATACT	0.9	0.5	0	0	0	0
chr12:33030969-33030999	rs3748279	chr12	33030994	33030995	C	T	snv	clinvar,clinvarBenign,commonSome,rareSome,	0.108911	PKP2	-	0.0112695	NM_001005242	-1830	-1971	cds	2-quartet	GTCAGGCCGCTGGTGCCCCTGCAGCCCGTCACTCAGAACA	GTCAGGCCACTGGTGCCCCTGCAGCCCGTCACTCAGAACA	-8.8	-2.8	1	1	0	0
chr17:292752-292782	rs59602528	chr17	292758	292759	C	T	snv	commonSome,rareSome,	0.109225	FAM101B	-	0.0108599	NM_182705	-38	-379	utr3	Others	GCATCTCATAATTATTGAGATCTTTGTGTTGTAATTTTCA	GCATCTCATAATTATTGAGATCTTTGTATTGTAATTTTCA	-2.5	-2.5	0	0	0	0
chr20:55111266-55111296	rs2296128	chr20	55111272	55111273	C	T	snv	commonSome,rareSome,	0.109625	FAM209B	+	0.00922047	NM_001013646	-232	-256	cds	Others	TTCGCACTCCACTAAAGAAAAATCAAAATGCTTCTCTTTA	TTCGCACTCCATTAAAGAAAAATCAAAATGCTTCTCTTTA	-2	-1.9	0	0	0	0
chr1:153931662-153931692	rs7704	chr1	153931678	153931679	C	A	snv	commonSome,commonAll,	0.110268	SLC39A1	-	4.09656e+09	NM_014437	-27	-56	utr3	long_loop	GCGTTATTTTTGGGGAGGGAGGGCTGTGCATAGGGACATA	GCGTTATTTTTGGGGAGTGAGGGCTGTGCATAGGGACATA	1	1	1	1	0	0
chr19:55998246-55998276	rs77664073	chr19	55998261	55998262	C	T	snv	commonSome,commonAll,overlapDiffClass,	0.110623	NAT14	+	0.0139749	NM_020378	-332	-640	cds	2-quartet	GGAGGGCTGTGGCTACCAGGCCGAGGGGGGCTGGGGCTGC	GGAGGGCTGTGGCTACCAGGTCGAGGGGGGCTGGGGCTGC	-7.9	0.2	0	0	0	0
chr2:202507344-202507374	rs2241133	chr2	202507352	202507353	G	C	snv	clinvar,clinvarBenign,commonSome,commonAll,	0.111422	TMEM237	-	0.000983414	NM_152388	-1228	-5158	cds,utr5	2-quartet	GGCGGCCGCCGAGGCCGGCTAAACGCAGAATGGGGAAGAA	GGCGGCCGCCGAGGCCGGCTAAACGGAGAATGGGGAAGAA	-5.9	-5.9	0	0	0	0
chr5:79435381-79435411	rs149582959	chr5	79435410	79435411	A	G	snv	commonSome,commonAll,overlapDiffClass,	0.11222	SERINC5	-	0.00747762	NM_001174072	-28	-645	utr3	Others	TTCTTTCTCAACAACTCTTTCACAGAGGCAGTCATTTTGA	TTCTCTCTCAACAACTCTTTCACAGAGGCAGTCATTTTGA	-0.9	-0.9	0	0	0	0
chr14:23778672-23778702	rs1950252	chr14	23778697	23778698	G	A	snv	refIsMinor,commonSome,commonAll,	0.113219	BCL2L2	+	0.000259866	NM_001199839	0	-2220	utr3	2-quartet	ATGCTGGGCTGCCTGGCAAATCTGGTGGTGATGGGATTCC	ATGCTGGGCTGCCTGGCAAATCTGGTGGTGGTGGGATTCC	-0.5	-0.2	0	0	0	0
chr15:74276205-74276235	rs2289413	chr15	74276227	74276228	A	G	snv	commonSome,commonAll,	0.113219	STOML1	-	0.000761511	NM_001256673	-551	-622	utr3	2-quartet	GGCACCAAGCCTGAGGGGCCTCTTGGAGGAGGAGGTGTTC	GGCACCAAGCCCGAGGGGCCTCTTGGAGGAGGAGGTGTTC	-5.4	-5.4	0	0	0	0
chr8:145161806-145161836	rs11546144	chr8	145161822	145161823	A	G	snv	refIsMinor,commonSome,rareSome,	0.115615	MAF1	+	0.00180369	NM_032272	-374	-534	cds	bulge	GTGGAGGAAGAAAGCAGAAGCGGGGGCAGTGGGGCCGAGG	GTGGAGGAAGAAAGCAGAAGCAGGGGCAGTGGGGCCGAGG	-0.9	-0.9	0	0	0	0
chr5:180218815-180218845	rs2070924	chr5	180218830	180218831	G	A	snv	commonSome,commonAll,overlapDiffClass,	0.116813	MGAT1	-	0.00535516	NM_001114619	-414	-1248	cds	bulge	ACCAATGACCGGAAGGAGCTGGGGGAGGTGCGGGTGCAGT	ACCAATGACCGGAAGGAGTTGGGGGAGGTGCGGGTGCAGT	-1.3	-2.2	1	1	0	0
chr17:78075452-78075482	rs2304849	chr17	78075461	78075462	G	C	snv	clinvar,clinvarBenign,commonSome,commonAll,overlapDiffClass,	0.118011	GAA	+	0.0052612	NM_000152	-3610	-3625	utr5	long_loop	GCTTCCCTGAGCGCGGGCCGGGTCGGTGGGGCGGTCGGCT	GCTTCCCTGAGCGCCGGCCGGGTCGGTGGGGCGGTCGGCT	-5.7	-8.1	0	0	0	0
chr12:56360854-56360884	rs2069398	chr12	56360875	56360876	G	A	snv	commonSome,commonAll,	0.118211	CDK2	+	3.02923e+08	NM_001798	-998	-1939	cds	2-quartet	AAAGCCAGAAACAAGTTGACGGGAGAGGTGGTGGCGCTTA	AAAGCCAGAAACAAGTTGACGGGAGAAGTGGTGGCGCTTA	0	0	1	1	0	0
chr17:2288852-2288882	rs62067041	chr17	2288853	2288854	C	G	snv	commonSome,commonAll,	0.119808	MNT	-	0.00243115	NM_020310	942	-1445	utr3	bulge	GTCAAGGACAGGGCTGAGCGTGGAAGGGGGAGGAGTCAGG	GTCAAGGACAGGGCTGAGCGTGGAAGGGGGAGCAGTCAGG	0	0	1	1	0	0
chr3:44380254-44380284	rs11540403	chr3	44380259	44380260	T	C	snv	commonSome,commonAll,	0.122804	C3orf23	+	0.0143228	NM_173826	-1654	-1609	utr5	bulge	TGTCCTCCCTTCTGGTGTACTGGGTGGGAGGTGGAACTAG	TGTCCTCCCTCCTGGTGTACTGGGTGGGAGGTGGAACTAG	-3.6	-7.4	1	1	0	0
chr6:52364838-52364868	rs998100	chr6	52364844	52364845	C	T	snv	commonSome,commonAll,	0.122804	TRAM2	-	0.00774764	NM_012288	154	-2614	utr3	bulge	GACACAGCAGGAGGAGAGGGAGGTGGCGCTGGTGGACCAA	GACACAGCAGGAGGAGAGGGAGGTGGCACTGGTGGACCAA	-0.2	-2.5	1	1	0	0
chr8:125324356-125324386	rs72721440	chr8	125324372	125324373	C	A	snv	commonSome,commonAll,overlapDiffClass,	0.123003	TMEM65	-	8.77964e+06	NM_194291	-11	-101	utr3	PQs_7	AGAGTGCTTAAATTTTTGGGGGGGGAAGGGTGGGGTAAAG	AGAGTGCTTAAATTTTTTGGGGGGGAAGGGTGGGGTAAAG	1	1	0	0	1	1
chr12:14929627-14929657	rs11612057	chr12	14929641	14929642	A	T	snv	commonSome,rareSome,	0.123203	H2AFJ	+	0.0106348	NM_177925	-629	-1259	utr3	Others	AACATTAATAGGACTTTTTAAAAAATGCCTCATTGTTAGA	AACATTAATAGGACTTTTTTAAAAATGCCTCATTGTTAGA	-1.2	-1.8	1	1	0	0
chr17:7366342-7366372	rs78260319	chr17	7366347	7366348	A	C	snv	commonSome,commonAll,overlapDiffClass,	0.124002	ZBTB4	-	0.00213775	NM_001128833	-1102	-2973	cds	2-quartet	AGGAGGACGAAGAGGAGGAGGAGGAGGATGAGGAGGAATC	AGGAGGACGAAGAGGAGGAGGAGGAGGAGGAGGAGGAATC	0.4	0.4	0	0	0	0
chr19:8553604-8553634	rs6992	chr19	8553629	8553630	T	C	snv	refIsMinor,commonSome,commonAll,	0.124002	HNRNPM	+	0.00297155	NM_031203	-317	-343	cds	bulge	GATGGAGAATGGGAAGTCCAAGGGGTGTGGCGTGGTTAAG	GATGGAGAATGGGAAGTCCAAGGGGTGTGGTGTGGTTAAG	-0.8	-0.8	0	0	0	0
chr5:180218815-180218845	rs2070925	chr5	180218819	180218820	C	A	snv	commonSome,commonAll,	0.124201	MGAT1	-	0.00535516	NM_001114619	-414	-1248	cds	bulge	ACCAATGACCGGAAGGAGCTGGGGGAGGTGCGGGTGCAGT	ACCAATGACCGGAAGGAGCTGGGGGAGGTTCGGGTGCAGT	-1.3	-3.3	1	1	0	0
chr7:4810181-4810211	rs11541132	chr7	4810199	4810200	T	C	snv	commonSome,commonAll,overlapDiffClass,	0.124638	FOXK1	+	0.0150429	NM_001037165	-283	-837	utr3	Others	ATCAAGTATTTTAAGTTTGGCTCTTCTTTTTTTCAAGAAA	ATCAAGTATTTTAAGTTTGGCTCCTCTTTTTTTCAAGAAA	-0.9	0.1	0	0	0	0
chr7:32997021-32997051	rs13437907	chr7	32997028	32997029	G	A	snv	commonSome,commonAll,	0.125799	FKBP9	+	0.00357132	NM_007270	-2101	-3376	utr5	PQs_7	CCCTGGAGCTGCGGCCGGGAGGGCGGGCGGCCGGGGAGAC	CCCTGGAGCTGCAGCCGGGAGGGCGGGCGGCCGGGGAGAC	-12.1	-11.4	0	0	1	1
chr1:38174961-38174991	rs7822	chr1	38174986	38174987	C	T	snv	refIsMinor,commonSome,commonAll,	0.126597	CDCA8	+	6.34782e+07	NM_018101	145	-369	utr3	PQs_7	TCTCTCTTATGGGGTTCATGGGAACAGGGGTGGGTGTGAC	TCTCTCTTATGGGGTTCATGGGAACAGGGGCGGGTGTGAC	-1.2	-1.2	1	1	1	1
chr17:77083444-77083474	rs67391975	chr17	77083458	77083459	C	T	snv	commonSome,commonAll,	0.126597	ENGASE	+	0.0042904	NM_001042573	-1156	-1185	utr3	bulge	CAGCACAGGTGCGTGGGGGCGTGAGGGAGGCAGGGTCTTC	CAGCACAGGTGCGTGGGGGTGTGAGGGAGGCAGGGTCTTC	-0.2	-0.2	0	0	0	0
chr10:101090409-101090439	rs2862600	chr10	101090427	101090428	G	T	snv	refIsMinor,commonSome,commonAll,	0.130192	CNNM1	+	0.000879187	NM_020348	-2018	-4305	cds	Others	GCCCTGGAGCTGCGCACCAAAGTTGTGGAGGAGGTGCTGA	GCCCTGGAGCTGCGCACCAAAGTGGTGGAGGAGGTGCTGA	-3.4	-3.4	0	0	0	0
chr11:6238943-6238973	rs3750943	chr11	6238959	6238960	C	A	snv	commonSome,commonAll,	0.130591	FAM160A2	-	0.0130329	NM_001098794	-1157	-1143	cds	PQs_7	GCTGGGGAGGAGGGGGCGGGCTGGGGGTGCAGGGGAGGGC	GCTGGGGAGGAGGGGGCTGGCTGGGGGTGCAGGGGAGGGC	0.5	0.5	0	0	1	1
chr17:8024785-8024815	rs8076629	chr17	8024807	8024808	C	A	snv	commonSome,commonAll,	0.132987	HES7	-	0.0017589	NM_001165967	-77	-854	utr3	PQs_7	CCCGGGCGTCCGGGCGAGCAGGTGTTGGGGAGGGCAGTGG	CCCGGGCGTCCTGGCGAGCAGGTGTTGGGGAGGGCAGTGG	-5.1	-2.9	0	0	0	0
chr12:64539664-64539694	rs789735	chr12	64539679	64539680	T	A	snv	commonSome,rareSome,	0.135783	SRGAP1	+	0.00063358	NM_020762	398	-1899	utr3	bulge	TGCAATTTGGGGAGGGGAGCTTTTTGATGGTGGGTAAATA	TGCAATTTGGGGAGGGGAGCATTTTGATGGTGGGTAAATA	1.9	0.6	0	0	0	0
chr17:73820930-73820960	rs7207208	chr17	73820934	73820935	G	A	snv	commonSome,rareSome,	0.13778	UNK	+	0.00132602	NM_001080419	174	-902	utr3	long_loop	GGAAGGGTGGGACTGGAAGGCACTAAGGGGAAGGGAGAAG	GGAAGGGTGAGACTGGAAGGCACTAAGGGGAAGGGAGAAG	0.2	0.2	1	1	0	0
chr1:33240172-33240202	rs8717	chr1	33240184	33240185	G	C	snv	commonSome,commonAll,	0.140974	KIAA1522	+	0.000396692	NM_001198973	-174	-351	utr3	2-quartet	CCCTGGCAGCAACCTGGGAATGGCTGGAGGTGGGAGAGAA	CCCTGGCAGCAACCTGGCAATGGCTGGAGGTGGGAGAGAA	-5.6	-4.7	0	0	0	0
chr18:46389056-46389086	rs8091995	chr18	46389068	46389069	G	T	snv	commonSome,commonAll,	0.141573	CTIF	+	0.00010252	NM_014772	-21	-477	utr3	PQs_7	TTTTCTCCGAGGGATGAGGGTGGGGGGTGTGGGAAGGGTA	TTTTCTCCGAGGGATGATGGTGGGGGGTGTGGGAAGGGTA	0.4	0.4	0	0	1	0
chr19:2232046-2232076	rs740404	chr19	2232048	2232049	G	A	snv	commonSome,commonAll,	0.142772	DOT1L	+	0.000562906	NM_032482	493	-477	utr3	bulge	GGGTGGTGTGTGGCGGGTGGCAGGGTGGCTGTGGAGACTG	GGGTGGTATGTGGCGGGTGGCAGGGTGGCTGTGGAGACTG	0.2	0.2	1	1	0	0
chr14:105350214-105350244	rs2582555	chr14	105350234	105350235	T	C	snv	commonSome,commonAll,	0.145567	KIAA0284	+	0.00808031	NM_001112726	-3646	-5300	cds	2-quartet	CCCTGGCCAAGGCGGCCTCGGCCGCTGGGGTGCCCTTGGA	CCCTGGCCAAGGCGGCCTCGGCCGCCGGGGTGCCCTTGGA	-7.3	-8.9	0	0	0	0
chr7:29960182-29960212	rs9912	chr7	29960210	29960211	C	A	snv	commonSome,rareSome,	0.148562	SCRN1	-	0.000220457	NM_014766	-317	-437	utr3	2-quartet	CTTAGGAAGGAAGCACGTGGAGGAGGGACGGAGGAGGTTC	CTTAGTAAGGAAGCACGTGGAGGAGGGACGGAGGAGGTTC	0.5	0.5	0	0	0	0
chr21:45181307-45181337	rs8377	chr21	45181310	45181311	G	A	snv	commonSome,commonAll,	0.149361	PDXK	+	0.000104733	NM_003681	-799	-823	utr3	bulge	TGTCTGGCGGATAGGTGGGTGGGAACAGAGAGGGGAGAAT	TGTCTGGCAGATAGGTGGGTGGGAACAGAGAGGGGAGAAT	-0.2	-0.2	1	1	0	0
chr19:47258840-47258870	rs2287717	chr19	47258841	47258842	C	T	snv	clinvar,clinvarBenign,commonSome,commonAll,	0.15016	FKRP	+	0.0149741	NM_024301	-2349	-2758	cds	Others	TGCTGCCGGCCCCCGTGTCACCGTCCTGGTGCGGGAGTTC	TGCTGCTGGCCCCCGTGTCACCGTCCTGGTGCGGGAGTTC	-5.9	-5.2	0	0	0	0
chr17:685733-685763	rs2249542	chr17	685751	685752	G	A	snv	commonSome,commonAll,	0.152356	RNMTL1	+	0.000278992	NM_018146	-1171	-1531	cds	2-quartet	AGTGAAAGTGGTGTTTCCTTCCGGAGAGGTGGTGGAACAG	AGTGAAAGTGGTGTTTCCTTCCGAAGAGGTGGTGGAACAG	-0.8	-0.8	1	1	0	0
chr2:210596810-210596840	rs76792277	chr2	210596824	210596825	T	C	snv	commonSome,commonAll,	0.152955	MAP2	+	2.35287e+09	NM_001039538	920	1585	utr3	2-quartet	TCTTTTTCTTGCTCAGGGCTGGTAGGTTGGATCTGAACCA	TCTTTTTCTTGCTCAGGGCCGGTAGGTTGGATCTGAACCA	-0.4	-0.6	1	1	0	0
chr16:11772027-11772057	rs8191341	chr16	11772050	11772051	G	A	snv	commonSome,rareSome,	0.154206	SNN	+	0.000935631	NM_003498	-138	-854	utr3	2-quartet	CCTGCAGGCTGGGTGGGCAGGACACGTGGTGGGGGCCACT	CCTGCAGGCTGGGTGGGCAGGACACGTGATGGGGGCCACT	-3.8	-3.8	1	1	0	0
chr15:75093384-75093414	rs2229730	chr15	75093388	75093389	C	T	snv	commonSome,commonAll,	0.154553	CSK	+	8.42546e+09	NM_001127190	-660	-924	cds	bulge	GCTCCTGGGCGTGATCGTGGAGGAGAAGGGCGGGCTCTAC	GCTCCTGGGTGTGATCGTGGAGGAGAAGGGCGGGCTCTAC	-2	-0.9	0	0	0	0
chr3:52084028-52084058	rs3821841	chr3	52084039	52084040	C	T	snv	commonSome,commonAll,	0.15615	DUSP7	-	0.00213171	NM_001947	-131	-1069	utr3	2-quartet	CTGCTGCAAGTTGTGATTGGTGGGCTGGATGGTGGTCTTT	CTGCTGCAAGTTGTGATTGGTGAGCTGGATGGTGGTCTTT	1	1	0	0	0	0
chr2:172174137-172174167	rs2160699	chr2	172174149	172174150	G	A	snv	refIsMinor,commonSome,commonAll,overlapDiffClass,	0.158147	METTL8	-	0.0110414	NM_024770	0	-196	utr3	Others	TAAGTAAGGAACAGCTAGAGTTAGCTGAATGAATAAATAC	TAAGTAAGGAACAGCTAGAGTCAGCTGAATGAATAAATAC	-3.9	-2.8	1	1	0	0
chr2:172174137-172174167	rs2356707	chr2	172174150	172174151	C	A	snv	refIsMinor,commonSome,commonAll,overlapDiffClass,	0.158347	METTL8	-	0.0110414	NM_024770	0	-196	utr3	Others	TAAGTAAGGAACAGCTAGAGTTAGCTGAATGAATAAATAC	TAAGTAAGGAACAGCTAGAGGTAGCTGAATGAATAAATAC	-3.9	-3.8	1	1	0	0
chr17:7465333-7465363	rs11654859	chr17	7465338	7465339	C	T	snv	commonSome,commonAll,overlapDiffClass,	0.158946	SENP3	+	7.58525e+09	NM_015670	-2306	-2413	utr5	2-quartet	GCGCTGGTGGCGGCGGTGGCGGAGGTGGAGGTGGAGGTGG	GCGCTGGTGGTGGCGGTGGCGGAGGTGGAGGTGGAGGTGG	-1.9	-0.9	0	0	0	0
chr15:43651235-43651265	rs935901	chr15	43651255	43651256	G	C	snv	commonSome,commonAll,	0.159545	ZSCAN29	-	7.29233e+08	NM_152455	513	-842	utr3	bulge	GCAAAATTGAGTGCTGGGTGGGTTGAGGAATGGGAAAAAG	GCAAAATTGAGTGGTGGGTGGGTTGAGGAATGGGAAAAAG	-0.5	2	0	0	0	0
chr5:107195246-107195276	rs1054248	chr5	107195261	107195262	C	A	snv	commonSome,commonAll,overlapDiffClass,	0.161342	FBXL17	-	1.82828e+09	NM_001163315	-66	-493	utr3	PQs_7	ATGCTTTAGCTTGGGGGGGTGGGGGTGGGGTGGGGACTTG	ATGCTTTAGCTTGGGGGGTTGGGGGTGGGGTGGGGACTTG	1.3	1.3	1	1	1	1
chr5:107195246-107195276	rs1368441	chr5	107195256	107195257	C	A	snv	commonSome,commonAll,	0.161542	FBXL17	-	1.82828e+09	NM_001163315	-66	-493	utr3	PQs_7	ATGCTTTAGCTTGGGGGGGTGGGGGTGGGGTGGGGACTTG	ATGCTTTAGCTTGGGGGGGTGGGTGTGGGGTGGGGACTTG	1.3	1.3	1	1	1	1
chr9:132572610-132572640	rs71481355	chr9	132572624	132572625	T	G	snv	commonSome,commonAll,overlapDiffClass,	0.16274	TOR1B	+	5.30315e+09	NM_014506	-303	-899	utr3	bulge	GAGCTGACCTGTGTGTGTGTGTGTGGGGGGGTGGGGCCTT	GAGCTGACCTGTGTGTGTGGGTGTGGGGGGGTGGGGCCTT	0.6	0.5	1	1	0	1
chr12:48177159-48177189	rs757342	chr12	48177169	48177170	C	G	snv	commonSome,commonAll,	0.163738	HDAC7	-	9.81463e+07	NM_001098416	26	-630	utr3	bulge	CCTTCCTAGGCTCTAGGGGCTAGGGGGGAGTGGGGAGCCA	CCTTCCTAGGCTCTAGGGGCTAGCGGGGAGTGGGGAGCCA	-1.6	-1.6	0	0	0	0
chr19:49611298-49611328	rs1058882	chr19	49611318	49611319	C	T	snv	commonSome,commonAll,overlapDiffClass,	0.166933	SNRNP70	+	0.00202285	NM_003089	-526	-512	cds	2-quartet	GGGAGCGCAAGGAGGAGCTGCGTGGCGGCGGTGGCGACAT	GGGAGCGCAAGGAGGAGCTGCGTGGTGGCGGTGGCGACAT	-3.6	-2.6	0	0	0	0
chr16:81743534-81743564	rs547353010	chr16	81743538	81743539	C	G	snv	commonSome,rareSome,	0.167332	CMIP	+	2.74281e+06	NM_030629	-337	-1780	utr3	PQs_7	TTCTGGGGGCGGAGGGGGGAGGGGGTGGGGAGGGGGCCCA	TTCTGGGGGGGGAGGGGGGAGGGGGTGGGGAGGGGGCCCA	-0.5	-0.5	0	0	1	1
chr16:81743534-81743564	rs565644918	chr16	81743541	81743542	A	G	snv	commonSome,commonAll,	0.167332	CMIP	+	2.74281e+06	NM_030629	-337	-1780	utr3	PQs_7	TTCTGGGGGCGGAGGGGGGAGGGGGTGGGGAGGGGGCCCA	TTCTGGGGGCGGGGGGGGGAGGGGGTGGGGAGGGGGCCCA	-0.5	-0.5	0	0	1	1
chr12:51566636-51566666	rs11169736	chr12	51566656	51566657	G	T	snv	commonSome,commonAll,overlapDiffClass,	0.16853	TFCP2	-	0.0144781	NM_005653	-2013	-3090	utr5	2-quartet	GGGAAAGAGAGAGCGAGACCTGGGAGGGAGGGGGCCTCCA	GGGAAAGAGAGAGAGAGACCTGGGAGGGAGGGGGCCTCCA	-2.7	-2.7	1	1	0	0
chr17:72443177-72443207	rs2706527	chr17	72443191	72443192	T	G	snv	refIsMinor,commonSome,commonAll,	0.16873	GPRC5C	+	0.0011834	NM_022036	-142	-337	utr3	bulge	CGGTGGCGAGGAGAGGCGGGCGGATTTGGGGAGGGCCCTG	CGGTGGCGAGGAGAGGCGGTCGGATTTGGGGAGGGCCCTG	-1.7	-1	0	0	0	0
chr8:134250155-134250185	rs1049697	chr8	134250164	134250165	G	A	snv	refIsMinor,clinvar,clinvarBenign,commonSome,commonAll,overlapDiffClass,	0.169728	NDRG1	-	1.14773e+07	NM_006096	638	-718	utr3	bulge	GGAGTAGGAGCACTGGGGTGGGGGTGGAATTGGGGTTACT	GGAGTAGGAGCACTGGGGTGGGGGCGGAATTGGGGTTACT	-0.3	-0.3	0	0	0	0
chr1:161332587-161332617	rs8266	chr1	161332607	161332608	G	A	snv	clinvar,clinvarBenign,commonSome,commonAll,overlapDiffClass,	0.170128	SDHC	+	327977	NM_003001	-18	-344	utr3	PQs_7	TCTGCCCTGGGGATGGGCCGGGTTGGGGGGTGGGTTGGTG	TCTGCCCTGGGGATGGGCCGGGTTGAGGGGTGGGTTGGTG	-2.5	-2.5	0	0	1	1
chr9:136334899-136334929	rs3094379	chr9	136334909	136334910	C	T	snv	refIsMinor,commonSome,commonAll,	0.170128	C9orf7	+	0.000231022	NM_017586	-324	-933	utr3	2-quartet	TTAGCCCAGGTGGGGTTTGGCAGAAGCGGGCGGGTGTGGA	TTAGCCCAGGTGGGGCTTGGCAGAAGCGGGCGGGTGTGGA	-1.2	-4.7	0	0	0	0
chr5:180004150-180004180	rs11738060	chr5	180004153	180004154	T	A	snv	commonSome,commonAll,overlapDiffClass,	0.173323	CNOT6	+	0.00500755	NM_015455	106	347	utr3	Others	AGAGAACATCTCCAGAAATGTGTGTGTGTGTGTGTGTGTG	AGAGAACAACTCCAGAAATGTGTGTGTGTGTGTGTGTGTG	-0.5	-0.3	1	1	0	0
chr1:20978823-20978853	rs6893	chr1	20978831	20978832	C	T	snv	refIsMinor,clinvar,clinvarBenign,commonSome,commonAll,	0.174321	DDOST	-	0.00241255	NM_005216	-68	-495	utr3	bulge	CTCCGCACAGCGTGGAGACGGGGCAAGGAGGGGGGTTATT	CTCCGCACAGCGTGGAGACGGGGCAGGGAGGGGGGTTATT	-1.8	-1.8	0	0	0	0
chr22:42070252-42070282	rs8779	chr22	42070275	42070276	C	T	snv	refIsMinor,commonSome,commonAll,	0.175919	NHP2L1	-	0.00089274	NM_001003796	19	-290	utr3	bulge	CTCCGGAGGCAGCCTGGGTGGGTGAGCCATGGGGCAGTTG	CTCCGGAGGCGGCCTGGGTGGGTGAGCCATGGGGCAGTTG	-3.5	-1.4	0	0	0	0
chr17:1478044-1478074	rs1051820	chr17	1478060	1478061	C	A	snv	refIsMinor,commonSome,commonAll,	0.177516	SLC43A2	-	1.01496e+08	NM_152346	0	-324	utr3	PQs_7	CGTGGGTGGGTCCGAGGTGTGTGTGGGGTCGGGGTGGGCT	CGTGGGTGGGTCCGAGGGGTGTGTGGGGTCGGGGTGGGCT	-0.8	-0.8	0	0	0	1
chr2:202901259-202901289	rs13034579	chr2	202901278	202901279	G	T	snv	commonSome,rareSome,	0.177716	FZD7	+	0.00331548	NM_003507	-348	-1763	utr3	bulge	GGGTGATTTGGAAAAGAAGACCTGGGTGGAAAGCGGTTTG	GGGTGATTTGGAAAAGAAGACCTGTGTGGAAAGCGGTTTG	0.5	0.5	1	1	0	0
chr21:47836176-47836206	rs35978208	chr21	47836205	47836206	A	C	snv	clinvar,clinvarBenign,commonSome,commonAll,	0.178315	PCNT	+	0.00476025	NM_006031	-3674	-4021	cds	Others	TCCTGTGACGGAGAAGAGCCTGACATATCACCCCACATAG	TCCTGTGACGGAGAAGAGCCTGACATATCACCCCCCATAG	-2.4	-1.3	1	1	0	0
chr15:66994804-66994834	rs62005619	chr15	66994829	66994830	C	T	snv	commonSome,commonAll,	0.179513	SMAD6	+	0.00958847	NM_005585	-2326	-2382	utr5	G_40	GCGCACGAAGCGTCCGAGGGCAGCGTGGGGCGGGCTGCGA	GCGCACGAAGCGTCCGAGGGCAGCGTGGGGTGGGCTGCGA	-5.3	-4.1	0	0	0	0
chr12:51566328-51566358	rs11169735	chr12	51566349	51566350	C	T	snv	commonSome,commonAll,	0.181709	TFCP2	-	0.000725085	NM_005653	-1705	-2782	utr5	2-quartet	CAGAGCAGTGCTGGTCGGGCTTGGGGGTGGCTGGTGGGCA	CAGAGCAGTGCTAGTCGGGCTTGGGGGTGGCTGGTGGGCA	-1.9	0	0	0	0	0
chr1:147091951-147091981	rs3820129	chr1	147091971	147091972	C	T	snv	commonSome,commonAll,	0.181909	BCL9	+	0.00368451	NM_004326	-2296	-3493	cds	Others	TCCAGGCTCCCAGCGCCACATGGAGCCTGGGAATAACCCC	TCCAGGCTCCCAGCGCCACATGGAGTCTGGGAATAACCCC	-8.9	-7.7	1	1	0	0
chr2:54014300-54014330	rs10181752	chr2	54014302	54014303	A	G	snv	commonSome,commonAll,	0.181909	ERLEC1	+	102957	NM_015701	-1544	-1634	utr5	2-quartet	CTCCTGGAGCAGAGGAGGTTGTGGCGGTGGCTGGAGAAAG	CTCCTGGGGCAGAGGAGGTTGTGGCGGTGGCTGGAGAAAG	-2.2	-2.2	0	0	0	0
chr7:75167202-75167232	rs1167832	chr7	75167224	75167225	C	T	snv	commonSome,commonAll,	0.181909	HIP1	-	0.00277511	NM_005338	-165	-4562	utr3	bulge	AGCCTAGGTACGAAGAGGGGTGGTGGGGGGCAGGGCCACT	AGCCTAGGTACAAAGAGGGGTGGTGGGGGGCAGGGCCACT	-1.2	-1.2	0	0	0	0
chr15:86291232-86291262	rs870689	chr15	86291256	86291257	G	A	snv	commonSome,commonAll,overlapDiffClass,	0.183107	AKAP13	+	0.00246064	NM_007200	154	-1305	utr3	Others	GAACTAGATAGACCCTGCCTTAGTAGAGGGTGGGACTATA	GAACTAGATAGACCCTGCCTTAGTAGAGGATGGGACTATA	-4.9	-6.3	3	3	0	0
chr3:33186081-33186111	rs4355234	chr3	33186086	33186087	A	G	snv	clinvar,clinvarBenign,commonSome,commonAll,	0.184105	CRTAP	+	0.000516192	NM_006371	1458	-393	utr3	2-quartet	GCTACCATGCATGGTAGTGTGTTGGGGGTGGGGGTCCTGG	GCTACCATGCGTGGTAGTGTGTTGGGGGTGGGGGTCCTGG	-3.2	-3.8	0	0	0	0
chrX:48900820-48900850	rs58910174	chrX	48900846	48900847	T	C	snv	commonSome,commonAll,	0.184371	TFE3	-	0.00224744	NM_006521	-2542	-3177	utr5	bulge	AGGCGGCAGTGGCGAGCTGGGGGGAGGGGGGACTCTTATT	AGGCGGCGGTGGCGAGCTGGGGGGAGGGGGGACTCTTATT	-2	-0.3	1	1	0	0
chr1:12290130-12290160	rs139881781	chr1	12290144	12290145	C	G	snv	commonSome,commonAll,	0.184505	VPS13D	+	0.00363007	NM_018156	-13470	-14503	utr5	2-quartet	AGGAAACGCCGCGCAGCGCCGGGCTGGGGCGGGCGGCCCG	AGGAAACGCCGCGCAGCGCGGGGCTGGGGCGGGCGGCCCG	-10.7	-9.6	0	0	0	0
chr9:134452353-134452383	rs6879	chr9	134452369	134452370	C	T	snv	commonSome,commonAll,overlapDiffClass,	0.185304	RAPGEF1	-	0.00175016	NM_005312	-75	-166	utr3	PQs_7	TGCAGGTGTCGGGGTGTGGGGGGGCAAGGAGGGGCAGGCA	TGCAGGTGTCGGGGTGTAGGGGGGCAAGGAGGGGCAGGCA	1	1	0	0	1	0
chr11:6502699-6502729	rs11604726	chr11	6502726	6502727	C	G	snv	commonSome,commonAll,	0.1877	FXC1	+	0.00703341	NM_012192	-460	-2768	utr5	G_40	CGGCACCGAGAAGCTGAAACGGAAGTGGCGTACGGCATGC	CGGCACCGAGAAGCTGAAACGGAAGTGGCGTAGGGCATGC	-4.1	-4.1	0	0	0	0
chr8:23119200-23119230	rs7361	chr8	23119204	23119205	T	C	snv	commonSome,commonAll,	0.188099	CHMP7	+	0.000536423	NM_152272	-40	-260	utr3	PQs_7	TGGGGGACTTGGGGTAGGGGGACAGACGGGAAAGGGTCTG	TGGGGGACTCGGGGTAGGGGGACAGACGGGAAAGGGTCTG	-3.1	-3.1	2	2	1	1
chr11:76494324-76494354	rs3740776	chr11	76494336	76494337	G	C	snv	commonSome,commonAll,	0.190695	TSKU	+	0.00207362	NM_015516	-1240	-2332	utr5	long_loop	GGGGGGAGCCTGGCTGCGGGCGGGGACCGGGGGGCGGGCC	GGGGGGAGCCTGGCTGCCGGCGGGGACCGGGGGGCGGGCC	-2.6	-5.5	1	1	1	0
chr15:35270986-35271016	rs7165312	chr15	35270995	35270996	C	T	snv	commonSome,rareSome,	0.193091	ZNF770	-	0.00098593	NM_014106	-80	-195	utr3	2-quartet	TTGGATTTTTGGTATCTGTGGGTTGGGGGGACGGTCCAGG	TTGGATTTTTGGTATCTGTGGGTTAGGGGGACGGTCCAGG	0.4	0.9	0	0	0	0
chr5:55264144-55264174	rs2228044	chr5	55264152	55264153	C	G	snv	commonSome,commonAll,	0.196286	IL6ST	-	6.51861e+07	NM_002184	-2464	-2500	cds	bulge	GAAGAAAATGAGGTGTGAGTGGGATGGTGGAAGGGAAACA	GAAGAAAATGAGGTGTGAGTGGGATCGTGGAAGGGAAACA	1.9	2	1	1	0	0
chr15:70341152-70341182	rs3195776	chr15	70341165	70341166	C	G	snv	commonSome,commonAll,overlapDiffClass,	0.197284	TLE3	-	0.00061651	NM_001105192	172	149	utr3	PQs_7	GGCAGAGCAGTGGGGGTTGGGGGGTGGGAGAGGGGGACAC	GGCAGAGCAGTGGGGGTTGGCGGGTGGGAGAGGGGGACAC	0.2	0.2	1	1	1	1
chr5:132215466-132215496	rs708457	chr5	132215476	132215477	C	A	snv	refIsMinor,diffMajor,commonSome,commonAll,	0.197484	AFF4	-	0.000331684	NM_014423	-59	-3765	utr3	bulge	GTGTGAGCTCTTGGGACAGGGAGTGGAGCCAGGGGTAGAG	GTGTGAGCTCTTGGGACAGGGAGGGGAGCCAGGGGTAGAG	-0.4	-0.4	1	1	0	1
chr1:226595624-226595654	rs907187	chr1	226595646	226595647	C	G	snv	commonSome,commonAll,	0.199081	PARP1	-	0.000173733	NM_001618	-3723	-3474	cds,utr5	2-quartet	CCGGAGCTTTGGCGGCAGCTAGGGGAGGATGGCGGAGTCT	CCGGAGCTTTGCCGGCAGCTAGGGGAGGATGGCGGAGTCT	-2.7	-4.5	0	0	0	0
chr1:8418631-8418661	rs1058766	chr1	8418649	8418650	C	T	snv	refIsMinor,commonSome,commonAll,overlapDiffClass,	0.19988	RERE	-	0.000725343	NM_001042681	-760	-3398	cds	long_loop	AGAGCGGGAGATCCGAGAGCGGGAGCTGCGGGAGAGGATG	AGAGCGGGAGATCCGGGAGCGGGAGCTGCGGGAGAGGATG	-3.8	-2.5	0	0	0	1
chr22:40815078-40815108	rs8135911	chr22	40815088	40815089	G	C	snv	commonSome,rareSome,	0.20028	MKL1	-	0.00131654	NM_020831	-1534	-2515	cds	2-quartet	TTTGGCAGCACGGGCTCCACGCCCCCCGTGTCTCCCACCC	TTTGGCAGCACGGGCTCCACGCCGCCCGTGTCTCCCACCC	-7.9	-10.4	0	0	0	0
chr1:8418631-8418661	rs11121172	chr1	8418643	8418644	A	C	snv	refIsMinor,commonSome,commonAll,overlapDiffClass,	0.202476	RERE	-	0.000725343	NM_001042681	-760	-3398	cds	long_loop	AGAGCGGGAGATCCGAGAGCGGGAGCTGCGGGAGAGGATG	AGAGCGGGAGATCCGAGAGCGTGAGCTGCGGGAGAGGATG	-3.8	-3.9	0	0	0	0
chr12:3392534-3392564	rs634076	chr12	3392557	3392558	C	T	snv	commonSome,commonAll,	0.202476	TSPAN9	+	0.00216812	NM_006675	0	-3134	utr3	bulge	AGACGACAGGGTGGGCTGGGGTGCGCTCCGGAGGAACCCC	AGACGACAGGGTGGGCTGGGGTGCGCTCTGGAGGAACCCC	-5.4	-3.1	1	1	0	0
chr11:36485317-36485347	rs331439	chr11	36485344	36485345	C	G	snv	refIsMinor,commonSome,commonAll,	0.202676	PRR5L	+	0.00186488	NM_001160169	79	-1383	utr3	G_40	TCAGGATAAAGAGATCCATGGTGGGCAGGGCTGTTAGGTC	TCAGGATAAAGAGATCCATGGTGGGCAGGGCTCTTAGGTC	-0.5	-2.3	0	0	0	0
chr17:75211599-75211629	rs12942219	chr17	75211607	75211608	G	A	snv	commonSome,commonAll,	0.204073	SEC14L1	+	0.0044313	NM_001204410	1171	-1529	utr3	bulge	TGTGCCCCGTGCAGGGATCAGGAGGGCGGGGGAGGGACCG	TGTGCCCCGTGCAAGGATCAGGAGGGCGGGGGAGGGACCG	-3.1	-3.1	1	1	1	0
chr1:22005648-22005678	rs1059218	chr1	22005664	22005665	C	T	snv	commonSome,commonAll,overlapDiffClass,	0.204872	USP48	-	0.00560218	NM_032236	22	65	utr3	PQs_7	GGGGTGGTGGGTGGGAGGGGGCAAGTAAAGACGGAACAAG	GGGGTGGTGGGTGGGAGAGGGCAAGTAAAGACGGAACAAG	1.5	1.5	1	1	1	1
chr19:8373139-8373169	rs2232775	chr19	8373151	8373152	T	C	snv	clinvar,clinvarBenign,commonSome,commonAll,overlapDiffClass,	0.204872	CD320	-	0.000762736	NM_016579	-1098	-1128	cds	2-quartet	TGAGCGGCGGTTGGATGGCGCAGGTTGGAGCGTGGCGAAC	TGAGCGGCGGTTGGATGGCGCGGGTTGGAGCGTGGCGAAC	-1.3	-1.3	0	0	0	0
chrX:17751935-17751965	rs58018369	chrX	17751957	17751958	A	T	snv	commonSome,commonAll,	0.205033	NHS	+	7.20589e+07	NM_001136024	-23	-2128	utr3	PQs_7	CTGCTTGATGGCAAAAGGGGAGGGTGGAGGGTGGGAGAGG	CTGCTTGATGGCAAAAGGGGAGGGTGGTGGGTGGGAGAGG	-0.5	-0.5	0	0	1	1
chr22:41940353-41940383	rs11554327	chr22	41940370	41940371	T	G	snv	commonSome,commonAll,overlapDiffClass,	0.20607	POLR3H	-	0.00199031	NM_001018050	-1554	-1284	utr5	bulge	GAGTGGCGTGGCGTGGAGTGGCGTGGCGTGGCGGGGTCTC	GAGTGGCGTGGCGTGGCGTGGCGTGGCGTGGCGGGGTCTC	1.3	0.2	0	0	0	0
chr9:131020795-131020825	rs199744363	chr9	131020817	131020818	A	C	snv	commonSome,rareSome,overlapDiffClass,	0.20627	GOLGA2	-	0.000143372	NM_004486	-1884	-2081	cds	2-quartet	GAGGAGGAGGATGAGGAGGAGGAGGAGGAGGAGGCGGTGG	GAGGAGGAGGAGGAGGAGGAGGAGGAGGAGGAGGCGGTGG	1600	1600	0	0	0	0
chr6:143810657-143810687	rs223234	chr6	143810681	143810682	T	A	snv	refIsMinor,clinvar,clinvarBenign,commonSome,commonAll,overlapDiffClass,	0.207268	PEX3	+	0.00598291	NM_003630	-435	-439	utr3	Others	TAGATATTTTATATACATATATATATATAAAAATACAAAA	TAGATATTTTATATACATATATATATATATAAATACAAAA	-3.2	-3.1	0	0	0	0
chr1:203277230-203277260	rs114151974	chr1	203277247	203277248	G	C	snv	commonSome,commonAll,overlapDiffClass,	0.213259	BTG2	+	0.00111044	NM_006763	38	-1449	utr3	long_loop	AAAGCTTTGGGTTTTCTGAGGGGGGGGAGGAGGGAACTGG	AAAGCTTTGGGTTTTCTGAGGGCGGGGAGGAGGGAACTGG	0	0	1	1	0	0
chr16:720950-720980	rs3743912	chr16	720959	720960	C	T	snv	commonSome,commonAll,	0.213658	RHOT2	+	5.16329e+09	NM_138769	-1466	-1625	cds	bulge	GTGGTGTGCAGGAACGTGGCGGGCGGCGTGCGGGAGGACC	GTGGTGTGCAGGAATGTGGCGGGCGGCGTGCGGGAGGACC	0.1	0.1	1	1	0	0
chr9:132572610-132572640	rs553747620	chr9	132572626	132572627	T	G	snv	commonSome,commonAll,overlapDiffClass,	0.214058	TOR1B	+	5.30315e+09	NM_014506	-303	-899	utr3	bulge	GAGCTGACCTGTGTGTGTGTGTGTGGGGGGGTGGGGCCTT	GAGCTGACCTGTGTGTGTGTGGGTGGGGGGGTGGGGCCTT	0.6	0.6	1	1	0	1
chr12:125627041-125627071	rs11058046	chr12	125627052	125627053	C	T	snv	commonSome,commonAll,	0.215056	AACS	+	0.000216544	NM_023928	-761	-764	utr3	2-quartet	TGCACACACAGTGCAGCGGGAACGGTGGGGCTGGCTGGTG	TGCACACACAGTGCAGTGGGAACGGTGGGGCTGGCTGGTG	-5	-4.4	0	0	0	0
chr16:58554139-58554169	rs7792	chr16	58554140	58554141	T	G	snv	refIsMinor,commonSome,commonAll,overlapDiffClass,	0.215056	CNOT1	-	0.00404228	NM_016284	-133	-266	utr3	Others	CAGGCCTAAAGCCCACCCCTACCCTCACCCCCCCAATCCT	CAGGCCTAAAGCCCACCCCTACCCTCACCCCCACAATCCT	-1.6	-1.6	0	0	0	0
chr17:37687949-37687979	rs1054488	chr17	37687967	37687968	G	A	snv	refIsMinor,commonSome,commonAll,overlapDiffClass,	0.217452	CDK12	+	0.000740782	NM_015083	-644	-521	utr3	2-quartet	TTTTTAAAGTTTTGGGGTGGGGGATTGTGTGTGGTTTCTT	TTTTTAAAGTTTTGGGGTGGGGGGTTGTGTGTGGTTTCTT	2.5	2.5	0	0	0	0
chr5:179157295-179157325	rs56396231	chr5	179157297	179157298	T	G	snv	commonSome,commonAll,overlapDiffClass,	0.217452	CANX	+	0.000976923	NM_001746	77	46	utr3	Others	TAAAGTTTGTTCACTTAAATTCTTTTGAGGATGGGATGTA	TAAAGTTGGTTCACTTAAATTCTTTTGAGGATGGGATGTA	-0.4	-0.4	0	0	0	0
chr17:66508219-66508249	rs8080306	chr17	66508242	66508243	A	C	snv	refIsMinor,commonSome,commonAll,	0.21905	PRKAR1A	+	0.00160685	NM_212471	-1349	-3474	utr5	G_40	GCTGCGCGGAGAGAGAGCGAAGAGCAGGCGGAGGAACAAA	GCTGCGCGGAGAGAGAGCGAAGAGCAGGAGGAGGAACAAA	-4	-4	1	1	0	0
chr22:36678116-36678146	rs136200	chr22	36678117	36678118	C	T	snv	clinvar,clinvarBenign,commonSome,commonAll,	0.220248	MYH9	-	4.74033e+09	NM_002473	-74	-770	utr3	2-quartet	TGTGCAGGGCACAGAAGGCTGGGGTGGGGGGAGGAGTGGA	TGTGCAGGGCACAGAAGGCTGGGGTGGGGGGAAGAGTGGA	-3.2	-3.2	0	0	0	0
chr12:108127754-108127784	rs1045739	chr12	108127777	108127778	C	T	snv	commonSome,commonAll,	0.220447	PRDM4	-	1.0398e+09	NM_012406	55	-1088	utr3	2-quartet	CATGTGTCCTGTTTTAAGTGGTGGACTGGGAGGGAAGTGT	CATGTGTCCTATTTTAAGTGGTGGACTGGGAGGGAAGTGT	-1.2	-0.5	1	1	0	0
chr2:174087288-174087318	rs6746658	chr2	174087309	174087310	T	A	snv	commonSome,commonAll,overlapDiffClass,	0.220847	ZAK	+	0.00135277	NM_133646	926	-4536	utr3	Others	CTGTATTTTCCAGCAAGTGGGGTATGTGTGGTGGTTTGTT	CTGTATTTTCCAGCAAGTGGGGTATGAGTGGTGGTTTGTT	-2.9	-2.9	0	0	0	0
chr2:174087288-174087318	rs6731949	chr2	174087308	174087309	G	A	snv	commonSome,commonAll,overlapDiffClass,	0.221246	ZAK	+	0.00135277	NM_133646	926	-4536	utr3	Others	CTGTATTTTCCAGCAAGTGGGGTATGTGTGGTGGTTTGTT	CTGTATTTTCCAGCAAGTGGGGTATATGTGGTGGTTTGTT	-2.9	-2.9	0	0	0	0
chr3:105587830-105587860	rs7649466	chr3	105587844	105587845	C	G	snv	commonSome,commonAll,	0.221246	CBLB	-	0.0103499	NM_170662	-3414	-3881	utr5	Others	GGTGGGGTGTCCAGCGAGCGGTCTCCTCCTCCTGCTAGTG	GGTGGGGTGTCCAGCGAGCCGTCTCCTCCTCCTGCTAGTG	-1.3	-1.3	0	0	0	0
chr10:98346633-98346663	rs1062176	chr10	98346648	98346649	T	G	snv	commonSome,commonAll,overlapDiffClass,	0.222045	TM9SF3	-	0.00016432	NM_020123	-1865	-2588	utr5	2-quartet	AGGCGGCGGCGGCGGAGGAGGCGGCGGCGGGAGGAGGAGT	AGGCGGCGGCGGCGGAGGCGGCGGCGGCGGGAGGAGGAGT	-8.1	-13	0	0	0	0
chr1:26286814-26286844	rs2782814	chr1	26286839	26286840	G	A	snv	commonSome,commonAll,	0.223642	PAFAH2	-	0.0036233	NM_000437	219	431	utr3	Others	CAAGACTTCGTGCCTCAGTCCAAGTAGGTAAGAGCAAAAG	CAAGACTTTGTGCCTCAGTCCAAGTAGGTAAGAGCAAAAG	-0.5	-1.5	1	1	0	0
chr19:3491061-3491091	rs140317642	chr19	3491086	3491087	T	C	snv	commonSome,commonAll,overlapDiffClass,	0.223842	DOHH	-	0.00231104	NM_001145165	-233	-221	utr3	long_loop	GGAAGCCAAGGGAGGATCGCGAGGGGAGCCAGGGGAGGAT	GGAAGCCAGGGGAGGATCGCGAGGGGAGCCAGGGGAGGAT	-1.2	-1.2	0	0	0	0
chr19:2226667-2226697	rs3815308	chr19	2226675	2226676	G	A	snv	commonSome,commonAll,	0.225639	DOT1L	+	0.00637064	NM_032482	-460	-632	cds	long_loop	CGAGGGCAGCCGCGGCAAGGAGGCAGGGGAGGGCGGCCTA	CGAGGGCAGCCGCAGCAAGGAGGCAGGGGAGGGCGGCCTA	-5.2	-5.2	0	0	0	0
chr6:136682163-136682193	rs2076190	chr6	136682171	136682172	A	G	snv	refIsMinor,commonSome,commonAll,	0.228435	MAP7	-	0.00546641	NM_001198615	-586	-1279	cds	2-quartet	GGCGGAGGAGCGGGCGCTGCGCGAGCGGGAGGAGGCAGAG	GGCGGAGGAGCGGGCGCTGCGCGAGTGGGAGGAGGCAGAG	-2.9	-2.9	0	0	0	0
chr4:57333796-57333826	rs12513091	chr4	57333821	57333822	G	T	snv	clinvar,clinvarBenign,commonSome,commonAll,overlapDiffClass,	0.230831	SRP72	+	5.22647e+09	NM_006947	-2068	-3196	cds,utr5	2-quartet	CTCCTCCAAGATGGCGAGCGGCGGCAGCGGGGGGGTGTCA	CTCCTCCAAGATGGCGAGCGGCGGCAGCGGTGGGGTGTCA	-6.8	-6	0	0	0	0
chr7:133749524-133749554	rs1132683	chr7	133749549	133749550	G	A	snv	commonSome,commonAll,	0.23123	EXOC4	+	1.56856e+07	NM_021807	-902	-934	utr3	PQs_7	GTGGGATAGGGAGGAAGGTGGTATCAAATTGTTGGACTCT	GTGGGATAGGGAGGAAGGTGGTATCAAATTATTGGACTCT	0.5	0.3	1	1	0	0
chr2:68385080-68385110	rs2044693	chr2	68385096	68385097	G	A	snv	refIsMinor,commonSome,commonAll,	0.231629	PNO1	+	0.0002209	NM_020143	-839	-1112	cds	G_40	GAAATGGAAACGCAGAGCGCCAGGGCAGAGGAGGGCTTTA	GAAATGGAAACGCAGAGCGCCGGGGCAGAGGAGGGCTTTA	-1.1	-0.9	0	0	0	0
chr3:129275189-129275219	rs11920311	chr3	129275205	129275206	C	T	snv	commonSome,commonAll,	0.232628	PLXND1	-	0.0134741	NM_015103	-435	-815	cds	2-quartet	CAGCACAAGTTTGAGCAGGTGGTGGCTTTGATGGAGGACA	CAGCACAAGTTTGAGCAAGTGGTGGCTTTGATGGAGGACA	-3.4	-3.5	1	1	0	0
chr8:142161875-142161905	rs2304283	chr8	142161887	142161888	G	A	snv	commonSome,commonAll,	0.233027	DENND3	+	0.0103467	NM_014957	-3484	-4344	cds	Others	TTCGTCATGGCCCCCACGTCCTTCCTGATGGGCTGCCATC	TTCGTCATGGCCCCCACATCCTTCCTGATGGGCTGCCATC	-4.9	-4.9	0	0	0	0
chr17:47007941-47007971	rs2270576	chr17	47007962	47007963	C	T	snv	commonSome,commonAll,	0.233427	SNF8	-	5.07853e+09	NM_007241	-127	-461	cds	2-quartet	GGAACACCTGCTGAAGGAAGGGTTGGCGTGGCTGGACTTA	GGAACACCTGCTAAAGGAAGGGTTGGCGTGGCTGGACTTA	-1.5	-1.5	2	2	0	0
chr1:117664022-117664052	rs6657335	chr1	117664045	117664046	T	C	snv	refIsMinor,commonSome,commonAll,	0.234425	TRIM45	-	0.0108458	NM_025188	-2047	-2035	utr5	2-quartet	CGTGTCTGGTGTGGGATGCAGTGGAAAGGAGGGGGCCCTC	CGTGTCTGGTATGGGATGCAGTGGAAAGGAGGGGGCCCTC	-1.4	-1.4	0	0	0	0
chr15:78832789-78832819	rs3813571	chr15	78832791	78832792	G	T	snv	commonSome,commonAll,	0.235024	PSMA4	+	8.50459e+09	NM_002789	-1118	-1098	utr5	2-quartet	CATATTAGCAGCGGTTATTCGGTGAGCGGTGGTGGTTTAT	CATATTATCAGCGGTTATTCGGTGAGCGGTGGTGGTTTAT	-3.1	-4.4	0	0	0	0
chr2:40541-40571	rs6731388	chr2	40568	40569	T	C	snv	commonSome,commonAll,	0.236621	FAM110C	-	0.0129583	NM_001077710	-605	668	utr3	G_40	GCGGCTATAATGAGAATGTTCATGGGGGTTACTGGGTCCC	GCGGCTGTAATGAGAATGTTCATGGGGGTTACTGGGTCCC	-0.4	-0.4	0	0	0	0
chr1:179064856-179064886	rs1046385	chr1	179064874	179064875	G	A	snv	refIsMinor,commonSome,commonAll,overlapDiffClass,	0.238019	TOR3A	+	0.00123619	NM_022371	228	-221	utr3	2-quartet	TGGAGAATACACTCTAGGTTTGCAGGCTGGTGGGCTTTCA	TGGAGAATACACTCTAGGTTTGCGGGCTGGTGGGCTTTCA	0.4	0.4	0	0	0	0
chr4:3513105-3513135	rs1741556	chr4	3513124	3513125	G	A	snv	refIsMinor,commonSome,commonAll,	0.238019	LRPAP1	-	0.00225159	NM_002337	-5766	1163	utr3	Others	TCATCTAGCAGAAGTGTGTTCCTTTTCATTGCTGTATAGT	TCATCTAGCAGAAGCGTGTTCCTTTTCATTGCTGTATAGT	-0.1	-0.1	0	0	0	0
chr16:69497222-69497252	rs11075720	chr16	69497247	69497248	G	T	snv	refIsMinor,diffMajor,commonSome,commonAll,	0.239417	CYB5B	+	7.88009e+07	NM_030579	619	-2893	utr3	2-quartet	TGGCCCTTTCGTGTCTTGGGGGTGGAAAGGTAGGGATGAA	TGGCCCTTTCGTGTCTTGGGGGTGGAAAGGGAGGGATGAA	-2.2	-4	0	0	0	0
chr2:86366499-86366529	rs4832024	chr2	86366521	86366522	A	T	snv	refIsMinor,commonSome,commonAll,	0.241613	PTCD3	+	0.00952537	NM_017952	-2021	1256	utr3	2-quartet	TGTGTCCCAGCTAATTGGGAGGGTGAGTTGGGAGGATTGT	TGTGTCCCAGCTAATTGGGAGGGTGAGATGGGAGGATTGT	-5.2	-4.9	0	0	0	0
chr16:70696611-70696641	rs3752786	chr16	70696625	70696626	A	G	snv	commonSome,commonAll,	0.242013	MTSS1L	-	0.00146233	NM_138383	-5	15	utr3	bulge	ACTGTGGACGAGGACTAAGTGTGGGGGAGAGGGGACGATA	ACTGTGGACGAGGACTAAGCGTGGGGGAGAGGGGACGATA	0.9	-0.1	1	1	0	0
chr12:133298825-133298855	rs201902442	chr12	133298841	133298842	T	G	snv	commonSome,commonAll,overlapDiffClass,	0.243011	PGAM5	+	0.0139261	NM_001170544	299	-440	utr3	Others	AATGTGTGGTTTTTTTTTTGTTTTTTTTTTTTTGGAGACG	AATGTGTGGTTTTTTTTTTGTGTTTTTTTTTTTGGAGACG	2.3	2.3	0	0	0	0
chr17:42164868-42164898	rs228757	chr17	42164884	42164885	C	G	snv	refIsMinor,commonSome,commonAll,overlapDiffClass,	0.245407	HDAC5	-	5.08248e+08	NM_001015053	-1642	-1629	cds	bulge	GAGGAGGACGAGGAAGACGATGGGGAGGAGGAGGAGGATT	GAGGAGGACGAGGAAGAGGATGGGGAGGAGGAGGAGGATT	1	3.6	0	0	0	0
chr16:2264760-2264790	rs112351847	chr16	2264765	2264766	C	T	snv	commonSome,commonAll,overlapDiffClass,	0.246575	PGP	-	0.00162829	NM_001042371	-1121	-972	cds,utr5	2-quartet	CGGCCGGCGGGCGGCGATGGCGGCGGCGGAGGCCGGTGGC	CGGCCGGCGGGCGGCGATGGCGGCGGCGAAGGCCGGTGGC	-10.6	-10.6	0	0	0	0
chr19:17430836-17430866	rs7888	chr19	17430855	17430856	G	A	snv	commonSome,commonAll,	0.247005	DDA1	+	9.66706e+09	NM_024050	148	-215	utr3	PQs_7	TTACTGTGGCCGGGCGACAGGGGCGGGCCCGGGGTGGCCT	TTACTGTGGCCGGGCGACAGGGGCAGGCCCGGGGTGGCCT	-5.8	-5.8	0	0	1	0
chr3:196556478-196556508	rs9222	chr3	196556482	196556483	G	A	snv	commonSome,commonAll,	0.247804	PAK2	+	0.000334753	NM_002577	368	279	utr3	2-quartet	TAGCAAATCGACTGTAGAGACTTGGCGGCGGTGGCATTGC	TAGCAAATCAACTGTAGAGACTTGGCGGCGGTGGCATTGC	-0.6	-0.4	1	1	0	0
chr4:73922523-73922553	rs16849151	chr4	73922548	73922549	A	C	snv	commonSome,commonAll,	0.248602	COX18	-	0.00142025	NM_173827	-209	-699	utr3	2-quartet	CTGAGATGTTTCTTATTATTTTGGAGGTGGAGAGGATTTT	CTGAGATGGTTCTTATTATTTTGGAGGTGGAGAGGATTTT	0.5	0.5	0	0	0	0
chr6:158364735-158364765	rs1043864	chr6	158364759	158364760	A	G	snv	commonSome,commonAll,	0.248602	SNX9	+	2.46717e+08	NM_016224	395	-774	utr3	bulge	GCGGAGGCCTGTGTTCGGGAGGGCCTGGGAGAAGGAGGGC	GCGGAGGCCTGTGTTCGGGAGGGCCTGGGGGAAGGAGGGC	-2.9	-2.9	0	0	1	1
chr1:156106163-156106193	rs505058	chr1	156106184	156106185	T	C	snv	clinvar,clinvarBenign,commonSome,commonAll,	0.249201	LMNA	+	4.02516e+09	NM_170707	-844	-1606	cds	bulge	GGGCGCGTGGCCGTGGAGGAGGTGGATGAGGAGGGCAAGT	GGGCGCGTGGCCGTGGAGGAGGTGGACGAGGAGGGCAAGT	-2.1	-2.1	0	0	0	0
chr10:18965950-18965980	rs12098599	chr10	18965959	18965960	G	T	snv	commonSome,commonAll,overlapDiffClass,	0.251797	ARL5B	+	2.50329e+09	NM_178815	-23	-878	utr3	2-quartet	TATGGATGGTTTGTGGTGTGTGTGGGATGTGGGGGAATTA	TATGGATGGTTTGTTGTGTGTGTGGGATGTGGGGGAATTA	2.8	2.8	0	0	0	0
chr17:65068117-65068147	rs2363845	chr17	65068130	65068131	C	A	snv	refIsMinor,commonSome,commonAll,overlapDiffClass,	0.251997	HELZ	-	0.00389214	NM_014877	-828	-1521	utr3	2-quartet	TTATTATTATTTTTTTTTTTTGTGGGGGAGGGTGGTGAGG	TTATTATTATTTTTTTTTTTGGTGGGGGAGGGTGGTGAGG	2.2	2.2	0	0	0	0
chr22:41855905-41855935	rs5758364	chr22	41855911	41855912	C	A	snv	refIsMinor,diffMajor,commonSome,commonAll,overlapDiffClass,	0.252995	PHF5A	-	7.51558e+07	NM_032758	392	-158	utr3	PQs_7	CATTTCCCGTTTTTTTTGGGGGGGGGGTGGGGGGGCAGGG	CATTTCCCGTTTTTTTTGGGGGGGGGGGGGGGGGGCAGGG	-0.1	-0.1	0	0	1	1
chr22:41855905-41855935	rs9423	chr22	41855922	41855923	C	A	snv	refIsMinor,commonSome,commonAll,overlapDiffClass,	0.252995	PHF5A	-	7.51558e+07	NM_032758	392	-158	utr3	PQs_7	CATTTCCCGTTTTTTTTGGGGGGGGGGTGGGGGGGCAGGG	CATTTCCCGTTTTTTTGGGGGGGGGGGTGGGGGGGCAGGG	-0.1	-0.3	0	0	1	1
chr19:3976294-3976324	rs3170368	chr19	3976320	3976321	T	G	snv	commonSome,commonAll,overlapDiffClass,	0.255192	EEF2	-	269633	NM_001961	-70	-219	utr3	PQs_7	GGACTTAATGGGCCGGTCGGGGAGGGGGAGGCGGGATGGG	GGACTTACTGGGCCGGTCGGGGAGGGGGAGGCGGGATGGG	0	-0.6	1	1	1	1
chr9:119449585-119449615	rs12342207	chr9	119449608	119449609	G	C	snv	clinvar,clinvarBenign,commonSome,commonAll,	0.25599	TRIM32	+	0.00020943	NM_001099679	-3101	-3105	utr5	G_40	GGTGCTCAACGGCGCGTGCGCAGAGGGAGGCAGGCGGGTG	GGTGCTCAACGGCGCGTGCGCAGAGGGACGCAGGCGGGTG	-5.8	-8.4	0	0	0	0
chr19:11275401-11275431	rs199839456	chr19	11275410	11275411	C	T	snv	commonSome,commonAll,overlapDiffClass,	0.256589	KANK2	-	1.14423e+08	NM_001136191	67	-433	utr3	2-quartet	GGATGGATGGATGGATGGATGGATGGATGGATGGATGGAT	GGATGGATGGATGGATGGATGGATAGATGGATGGATGGAT	2.2	2.2	0	0	0	0
chr19:11275401-11275431	rs201162035	chr19	11275413	11275414	C	T	snv	commonSome,commonAll,overlapDiffClass,	0.256589	KANK2	-	1.14423e+08	NM_001136191	67	-433	utr3	2-quartet	GGATGGATGGATGGATGGATGGATGGATGGATGGATGGAT	GGATGGATGGATGGATGGATGAATGGATGGATGGATGGAT	2.2	2.2	0	0	0	0
chr15:40987545-40987575	rs1801321	chr15	40987564	40987565	G	T	snv	commonSome,commonAll,	0.256989	RAD51	+	0.0127549	NM_002875	-1205	-1456	utr5	PQs_7	CCGTGCGGGTCGGGCGCGTGCCACGCCCGCGGGGTGAAGT	CCGTGCGGGTCGGGCGCGTGCCACTCCCGCGGGGTGAAGT	-8.4	-7.5	0	0	0	0
chr2:160885437-160885467	rs3749117	chr2	160885441	160885442	T	C	snv	refIsMinor,diffMajor,commonSome,commonAll,	0.256989	PLA2R1	-	0.000132445	NM_001007267	-3432	-4057	cds	2-quartet	ACATGAGCAGTAAAACAGTGGAGGTGTGGATGGGCCTCAA	ACATGAGCAGTAAAACAGTGGAGGTGTGGGTGGGCCTCAA	-2.8	-0.7	1	1	0	0
chr16:69373388-69373418	rs11542583	chr16	69373413	69373414	T	C	snv	clinvar,clinvarBenign,commonSome,commonAll,overlapDiffClass,	0.257588	COG8	-	0.00111697	NM_032382	-1910	-2327	cds	2-quartet	ACGGCCACAGCAGCGGCTCTCGGCGAGGTGGAGGATGAAG	ACGGCCACGGCAGCGGCTCTCGGCGAGGTGGAGGATGAAG	-2.2	-1.8	0	0	0	0
chr16:28883223-28883253	rs7498665	chr16	28883240	28883241	A	G	snv	commonSome,commonAll,	0.261382	SH2B1	+	0.0113683	NM_001145796	-903	-1272	cds	Others	CCCCATTGAAGAGGGACCCCCAACAGGGACAGTTCATCCC	CCCCATTGAAGAGGGACCCCCAGCAGGGACAGTTCATCCC	-1.9	-1.9	2	2	0	0
chrX:123041809-123041839	rs28382742	chrX	123041833	123041834	G	T	snv	clinvar,clinvarBenign,commonSome,commonAll,overlapDiffClass,	0.264371	XIAP	+	4.48583e+09	NM_001167	-54	342	utr3	PQs_7	GGGAGGGGGGGATTGGGGGAGGGGCCCCAGAGGGGTTTTA	GGGAGGGGGGGATTGGGGGAGGGGCCCCATAGGGGTTTTA	-3	-3	0	0	1	1
chr19:1853644-1853674	rs3746043	chr19	1853666	1853667	G	C	snv	refIsMinor,commonSome,commonAll,	0.264776	KLF16	-	0.0113909	NM_031918	-80	-1220	utr3	long_loop	GGCCCTAGCTCGCCCTCTCTGGGTGGGTGGGTGAGAGAGG	GGCCCTAGCTCCCCCTCTCTGGGTGGGTGGGTGAGAGAGG	-5.9	-4.4	0	0	0	0
chr17:46128356-46128386	rs12936731	chr17	46128358	46128359	G	C	snv	commonSome,commonAll,	0.265375	NFE2L1	+	6.46212e+08	NM_003204	-2452	-4230	utr5	bulge	CCAGGGTGGGGTACGGGGTTTGACACTGAGGAGGGTAACC	CCAGGGTCGGGTACGGGGTTTGACACTGAGGAGGGTAACC	-3.3	-3.4	2	2	0	0
chr14:103195356-103195386	rs11548118	chr14	103195364	103195365	G	C	snv	commonSome,commonAll,overlapDiffClass,	0.270567	RCOR1	+	0.00412157	NM_015156	25	1228	utr3	2-quartet	GGTAGGGTTTGGGGTGTGATAACTGCTTCAGATGGAATGT	GGTAGGGTTTGGGCTGTGATAACTGCTTCAGATGGAATGT	0.1	-4.2	1	1	0	0
chr9:130242140-130242170	rs1539567	chr9	130242165	130242166	G	A	snv	refIsMinor,clinvar,clinvarBenign,commonSome,commonAll,overlapDiffClass,	0.272764	LRSAM1	+	0.00151778	NM_001005373	-1783	-1796	cds	Others	CAGGGCCTGAGTGAGCACCAGCGCCACCTCAACGCAGAGC	CAGGGCCTGAGTGAGCACCAGCGCCACCTCGACGCAGAGC	-1.8	-1.8	0	0	0	0
chr19:54652179-54652209	rs43211	chr19	54652202	54652203	C	T	snv	refIsMinor,commonSome,commonAll,	0.272963	CNOT3	+	0.000508333	NM_014516	-1263	-1297	cds	2-quartet	GCGGAGGCGGAGGCGGCGGCAGCGGAGGTGGAGGGAGCAG	GCGGAGGCGGAGGCGGCGGCAGCGGAGGCGGAGGGAGCAG	-0.9	-6.1	0	0	0	0
chr17:4848427-4848457	rs6559	chr17	4848449	4848450	G	A	snv	refIsMinor,diffMajor,commonSome,commonAll,	0.273163	RNF167	+	1.52815e+08	NM_015528	77	-35	utr3	bulge	CTATCCTTTTGAGGGGCTTTGGGGTGGAGCTGGGGCAAGC	CTATCCTTTTGAGGGGCTTTGGGGTGGGGCTGGGGCAAGC	-0.7	-0.7	0	0	0	1
chr5:6633014-6633044	rs10062086	chr5	6633041	6633042	C	T	snv	clinvar,clinvarBenign,commonSome,commonAll,	0.276558	NSUN2	-	0.000256861	NM_017755	-2736	-2893	cds	2-quartet	GCCGGAGGACGCGGAGGATGGCGCCGAGGGTGGTGGAAAG	GCCGGAAGACGCGGAGGATGGCGCCGAGGGTGGTGGAAAG	-1.7	-1.7	0	0	0	0
chr1:32372365-32372395	rs668203	chr1	32372388	32372389	C	A	snv	commonSome,rareSome,overlapDiffClass,	0.277157	PTP4A2	-	0.000794291	NM_080391	404	-321	utr3	2-quartet	GGGGGGAGGGGGTGTGTGTGTGTGTGTGTGTGTGTGTGTG	GGGGGGAGGGTGTGTGTGTGTGTGTGTGTGTGTGTGTGTG	1600	1600	0	0	0	0
chr12:115108354-115108384	rs1061651	chr12	115108360	115108361	T	C	snv	clinvar,clinvarBenign,commonSome,commonAll,	0.277756	TBX3	-	2.0858e+09	NM_016569	-185	-273	utr3	2-quartet	ATATAACTGAGATTGCTGTGGGGAGGGAGGAGGGCAGAGG	ATATAACTGAGATTGCTGTGGGGAGGGGGGAGGGCAGAGG	0.9	0.9	1	1	0	0
chr1:213224714-213224744	rs4951476	chr1	213224718	213224719	C	T	snv	refIsMinor,commonSome,commonAll,overlapDiffClass,	0.278155	RPS6KC1	+	0.00398265	NM_012424	-3957	-4014	utr5	2-quartet	CCGGGCGGGTGGCGGCGGCGGCAGAGGCGGCGGGAGGATG	CCGGGCGGGCGGCGGCGGCGGCAGAGGCGGCGGGAGGATG	-4.1	-4.1	0	0	0	0
chr8:30670155-30670185	rs1131305	chr8	30670162	30670163	G	T	snv	commonSome,commonAll,overlapDiffClass,	0.278954	PPP2CB	-	2.63835e+09	NM_001009552	-1287	-1741	utr5	PQs_7	GCGGCGCGCGGCCGGGCGGGGAAGGGCGGGCGGGGGTCTC	GCGGCGCGCGGCCGGGCGGGGAAGGGAGGGCGGGGGTCTC	-11.2	-4.4	0	0	1	1
chr10:126308925-126308955	rs1057103	chr10	126308932	126308933	A	C	snv	commonSome,commonAll,overlapDiffClass,	0.280351	FAM53B	-	0.00163945	NM_014661	-116	-1038	utr3	2-quartet	CTAAGCCTGCAGGAAAGCCGGGGCGGTGGGGGGGGCTTAG	CTAAGCCTGCAGGAAAGCCGGGGCGGGGGGGGGGGCTTAG	-3.8	-4.4	0	0	0	1
chr20:62373697-62373727	rs8957	chr20	62373706	62373707	T	G	snv	refIsMinor,commonSome,commonAll,	0.28095	SLC2A4RG	+	0.00252466	NM_020062	-664	-935	cds	G_40	CAGGCAGAGCCTGAGCAGAGTGATGGTGAGGAGGACTTCT	CAGGCAGAGCCTGATCAGAGTGATGGTGAGGAGGACTTCT	-4.2	-4.2	1	1	0	0
chr17:5346436-5346466	rs77195858	chr17	5346445	5346446	C	T	snv	commonSome,commonAll,overlapDiffClass,	0.283746	DHX33	-	6.51715e+09	NM_020162	457	-2181	utr3	PQs_7	GTATCTTTTTTGGTGTGTGGGCGGGGGGGGTGGGGGGCAG	GTATCTTTTTTGGTGTGTGGGCGGAGGGGGTGGGGGGCAG	2	2	0	0	1	0
chr14:89626557-89626587	rs11627037	chr14	89626560	89626561	G	A	snv	commonSome,commonAll,overlapDiffClass,	0.284345	FOXN3	-	0.000388909	NM_005197	367	-4001	utr3	bulge	GAAATTTTCTTTAATGGCGGGGGCGGGGGGCGGGGGTACA	GAAATTTTCTTTAATGGCGGGGGCGGGGGGTGGGGGTACA	0.2	0.6	0	0	0	0
chr7:72350153-72350183	rs2072300	chr7	72350158	72350159	G	A	snv	refIsMinor,commonSome,commonAll,	0.284345	POM121	+	0.013015	NM_172020	-4196	-5726	utr5	bulge	CAGAGGGGCCAGGCGGGAGGTGGTGGCGGAGGCGAAGGGG	CAGAGGGGCCGGGCGGGAGGTGGTGGCGGAGGCGAAGGGG	-1	0.1	0	0	0	0
chr1:245027330-245027360	rs6675421	chr1	245027348	245027349	C	T	snv	clinvar,clinvarBenign,commonSome,commonAll,overlapDiffClass,	0.285144	HNRNPU	-	0.000186881	NM_004501	-2180	-2440	cds	2-quartet	CGATGAAGAGGAGGAGGAAGAGGAAGAGGAGGAGGAAGGA	CGATGAAGAGGAGGAAGAAGAGGAAGAGGAGGAGGAAGGA	1600	1600	0	0	0	0
chr15:91185836-91185866	rs3743403	chr15	91185841	91185842	A	G	snv	commonSome,commonAll,	0.28754	CRTC3	+	0.0131225	NM_022769	88	-2680	utr3	2-quartet	GACCTGACCCAGAGGGCGAGGCCCTCCAGCGGGGGACATT	GACCTGACCCGGAGGGCGAGGCCCTCCAGCGGGGGACATT	-7.8	-10.6	2	2	0	0
chr19:11276241-11276271	rs4804571	chr19	11276253	11276254	T	C	snv	refIsMinor,commonSome,commonAll,overlapDiffClass,	0.288339	KANK2	-	0.0065261	NM_001136191	538	-1273	utr3	Others	ACCCTGTCTCAAGAAAGAAAAGAAAAAGAGACAAATTACC	ACCCTGTCTCAAGAAAGAAAAAAAAAAGAGACAAATTACC	-2.5	-2.5	1	1	0	0
chr7:123389066-123389096	rs4731119	chr7	123389092	123389093	G	C	snv	commonSome,commonAll,overlapDiffClass,	0.288339	WASL	-	0.00342216	NM_003941	-1841	-4345	utr5	PQs_7	GCCGCCGCTGCGGGAGGGTTGGGGGAGGAGTTGGGAGTTT	GCCGCCGGTGCGGGAGGGTTGGGGGAGGAGTTGGGAGTTT	-3.4	-3.4	0	0	1	1
chr13:110407877-110407907	rs2289046	chr13	110407905	110407906	T	C	snv	commonSome,commonAll,	0.291334	IRS2	-	2.49288e+11	NM_003749	284	-1667	utr3	PQs_7	AATCAACTGTATTGGGTAGTGGGAGGTGGGAGGGAAGGGC	AATCAGCTGTATTGGGTAGTGGGAGGTGGGAGGGAAGGGC	0.2	-0.5	0	0	1	1
chr7:99014976-99015006	rs2003499	chr7	99014983	99014984	T	C	snv	commonSome,commonAll,	0.292532	PTCD1	-	0.000313112	NM_015545	60	1743	utr3	Others	AAACCTTCCCCACCCTTGATCAAAAAAAGCATTCAGGCCG	AAACCTTCCCCACCCTTGATCAAAAAGAGCATTCAGGCCG	0.9	-1.9	1	1	0	0
chr6:157713750-157713780	rs3199374	chr6	157713776	157713777	C	T	snv	commonSome,commonAll,	0.294728	TMEM242	-	0.000934922	NM_018452	-1003	-204	utr3	G_40	CACAGGAGAGTATGTGTGTGCGTGCTGGGGGAGGGTAAAG	CACAGGAAAGTATGTGTGTGCGTGCTGGGGGAGGGTAAAG	-1.2	-1.2	0	0	0	0
chr7:26252198-26252228	rs12532361	chr7	26252203	26252204	G	T	snv	commonSome,commonAll,overlapDiffClass,	0.295527	CBX3	+	0.000332589	NM_016587	337	-720	utr3	Others	CGTGTTTTTTGTGTGTGTGTGTGTGTGTGTGTGTGTGTGT	CGTGTTTTTTTTGTGTGTGTGTGTGTGTGTGTGTGTGTGT	1600	1600	0	0	0	0
chr2:196999219-196999249	rs6760432	chr2	196999236	196999237	C	T	snv	refIsMinor,commonSome,commonAll,	0.296326	STK17B	-	0.000286368	NM_004226	79	-762	utr3	2-quartet	AAGAAAATTTTTCCACAGGACTGGGGGTTTAGGGGGATGG	AAGAAAATTTTTCCACGGGACTGGGGGTTTAGGGGGATGG	-2.1	0.4	1	1	0	0
chr9:33441703-33441733	rs200785872	chr9	33441710	33441711	A	C	snv	commonSome,commonAll,overlapDiffClass,	0.297125	AQP3	-	0.000395848	NM_004925	-13	-522	utr3	bulge	CATGTGTGTGCAGGGGTGTGTGTGTGTGGGGGGGGTTCCC	CATGTGTGTGCAGGGGTGTGTGTGTGGGGGGGGGGTTCCC	-1.6	-1.6	0	0	0	0
chr7:29961657-29961687	rs2269978	chr7	29961658	29961659	C	G	snv	commonSome,commonAll,overlapDiffClass,	0.298123	SCRN1	-	0.000167	NM_014766	-939	-1912	utr3	Others	TAAAAGTGTCTTTCTATCACTGTTAAGGGGGGGGGAAAGT	TAAAAGTGTCTTTCTATCACTGTTAAGGGGGGCGGAAAGT	-2.7	-2.7	0	0	0	0
chr9:133996434-133996464	rs2281906	chr9	133996438	133996439	C	T	snv	commonSome,commonAll,	0.300919	AIF1L	+	3.04437e+09	NM_031426	-250	-2049	utr3	bulge	CTTCGGAGGCAGAAGTGAGGCCTGGGGTTTTGGGGGAAAG	CTTCGGAGGTAGAAGTGAGGCCTGGGGTTTTGGGGGAAAG	-1.7	-0.9	0	0	0	0
chr12:130650022-130650052	rs1046895	chr12	130650040	130650041	G	A	snv	commonSome,commonAll,overlapDiffClass,	0.301318	FZD10	+	0.000308543	NM_007197	0	117	utr3	bulge	TTGGACTGATTTGTGGAAAGGAGGGGGGAAGAGGGAGAAG	TTGGACTGATTTGTGGAAAGGAGAGGGGAAGAGGGAGAAG	1.2	1.2	1	1	0	0
chr1:120254487-120254517	rs561931	chr1	120254505	120254506	G	A	snv	refIsMinor,clinvar,clinvarBenign,commonSome,commonAll,overlapDiffClass,	0.301717	PHGDH	+	0.0148616	NM_006623	-1781	-1886	utr5	Others	CGTCCAATCAAAAGGAGACTGTAAGAGGAGGAGGAGGAGG	CGTCCAATCAAAAGGAGACTGTAGGAGGAGGAGGAGGAGG	0	0	1	1	0	0
chr3:33185393-33185423	rs4678475	chr3	33185406	33185407	G	A	snv	clinvar,clinvarBenign,commonSome,commonAll,	0.301917	CRTAP	+	1.33506e+07	NM_006371	770	269	utr3	2-quartet	GGAAGGAGAGGCGGCTGGGGAGGACAGGTGGTGGAGGGCC	GGAAGGAGAGGCGGCTGGAGAGGACAGGTGGTGGAGGGCC	0.2	0.2	1	1	0	0
chr11:74553052-74553082	rs9444	chr11	74553073	74553074	T	C	snv	refIsMinor,diffMajor,commonSome,commonAll,overlapDiffClass,	0.302915	RNF169	+	0.00439492	NM_001098638	0	-352	utr3	Others	TAGTTTTTTTTTTTTTGAACCTGATACACTGTTTGTTTAC	TAGTTTTTTTTTTTTTGAACCTGATATACTGTTTGTTTAC	-0.1	0	1	1	0	0
chr9:137023970-137024000	rs11556391	chr9	137023978	137023979	G	A	snv	commonSome,commonAll,overlapDiffClass,	0.303914	WDR5	+	1.09984e+09	NM_052821	649	-1067	utr3	PQs_7	TCAGTGTTGCTGGGGGCGGGGAACGGGGGTGGGGAGGTTC	TCAGTGTTGCTGGAGGCGGGGAACGGGGGTGGGGAGGTTC	-0.4	-0.4	0	0	1	0
chr1:33235597-33235627	rs3737995	chr1	33235625	33235626	G	A	snv	commonSome,commonAll,overlapDiffClass,	0.307907	KIAA1522	+	0.000111639	NM_020888	-2485	-4503	cds	2-quartet	CCGGGTGTCCCTGCAGGCGCTGGAGGCGGAGGCGGAGGCT	CCGGGTGTCCCTGCAGGCGCTGGAGGCGGAGGCAGAGGCT	-6.2	-6.2	0	0	0	0
chr19:3490892-3490922	rs1051803	chr19	3490907	3490908	T	C	snv	commonSome,commonAll,	0.308107	DOHH	-	0.00176034	NM_001145165	-64	-52	utr3	long_loop	ACAGGGTGGTGGTCCCTGAGTGGGTCAGGTAGGGCACAGG	ACAGGGTGGTGGTCCCTGGGTGGGTCAGGTAGGGCACAGG	-3.1	-3	0	0	0	0
chr3:183685518-183685548	rs939336	chr3	183685533	183685534	G	A	snv	refIsMinor,diffMajor,commonSome,commonAll,	0.308307	ABCC5	-	0.000813164	NM_005688	-2755	-3856	cds	2-quartet	TAAACTGGTTGGAATCTGTGGCAGTGTGGGAAGTGGAAAA	TAAACTGGTTGGAATCTGCGGCAGTGTGGGAAGTGGAAAA	0.7	0.7	1	1	0	0
chr11:60703769-60703799	rs55920775	chr11	60703776	60703777	G	A	snv	refIsMinor,diffMajor,commonSome,commonAll,	0.311102	TMEM132A	+	4.94503e+09	NM_017870	-666	-810	cds	2-quartet	AAGGAGGAGACCGAAGCCAGGGAGGAGGAGGAGGAAGAGG	AAGGAGGAGACCAAAGCCAGGGAGGAGGAGGAGGAAGAGG	-1.7	-1.8	1	1	0	0
chr17:42148198-42148228	rs228758	chr17	42148204	42148205	C	T	snv	refIsMinor,diffMajor,clinvar,clinvarBenign,commonSome,commonAll,overlapDiffClass,	0.323083	G6PC3	+	5.31776e+09	NM_138387	-1203	-1425	utr5	long_loop	TTGGTGGTGACCGCTGGCGGGGCGGGGCCTGGGGCTCAGA	TTGGTGGTGACTGCTGGCGGGGCGGGGCCTGGGGCTCAGA	-3.3	-0.5	1	1	0	0
chr11:60658543-60658573	rs549547187	chr11	60658565	60658566	A	C	snv	commonSome,commonAll,overlapDiffClass,	0.326478	PRPF19	-	4.82362e+09	NM_014502	-27	-321	utr3	PQs_7	GGGGGGGGGGGTGGGGGGAATCTATGGGGGGAGGGGGCTC	GGGGGGGGGGGGGGGGGGAATCTATGGGGGGAGGGGGCTC	2.2	2.2	0	0	1	1
chr7:150773797-150773827	rs7262	chr7	150773806	150773807	T	A	snv	refIsMinor,diffMajor,commonSome,commonAll,overlapDiffClass,	0.33127	FASTK	-	0.000123078	NM_006712	-33	-66	cds,utr3	PQs_7	GGGGGCCTGAAGGGGGCTGAGGGGTTGATGTGGGGTTCAG	GGGGGCCTGAAGGGGGCTGAGGGGATGATGTGGGGTTCAG	-0.6	-0.6	0	0	1	1
chr3:52802381-52802411	rs2230534	chr3	52802401	52802402	A	C	snv	commonSome,commonAll,	0.33147	NEK4	-	0.00363519	NM_003157	-2450	-3167	cds	Others	GGCAGCTTCTGCCTGAGAATCAGGTGGTAGAGTGGTTTGT	GGCAGCTTCTGCCGGAGAATCAGGTGGTAGAGTGGTTTGT	-3.9	-3.3	0	0	0	0
chr19:14492267-14492297	rs2302996	chr19	14492271	14492272	T	C	snv	commonSome,commonAll,	0.332668	CD97	+	0.00737131	NM_001784	-2310	-2849	utr5	Others	CCTAGCCTGTGGAGACGGGACAGCCCTGTCCCACTCACTC	CCTAGCCTGCGGAGACGGGACAGCCCTGTCCCACTCACTC	-7.1	-5.3	1	1	0	0
chr8:82671259-82671289	rs13249830	chr8	82671272	82671273	G	C	snv	commonSome,commonAll,	0.33726	CHMP4C	+	0.00706742	NM_152284	-203	200	utr3	bulge	TACATTTAGTATAGCGGGGGGTGGGGGGGAGAAATAATGT	TACATTTAGTATAGCGGGCGGTGGGGGGGAGAAATAATGT	0.3	0.3	0	0	0	0
chr1:16091067-16091097	rs6429776	chr1	16091073	16091074	A	G	snv	commonSome,commonAll,	0.33746	FBLIM1	+	0.0031729	NM_017556	-1301	-3128	utr5	2-quartet	TGTGGCCCAGCAGGCAGGCGGGACTCCAGACTGGGAACGG	TGTGGCCCAGCGGGCAGGCGGGACTCCAGACTGGGAACGG	-3.5	-3.6	2	2	0	0
chr5:65124406-65124436	rs10085083	chr5	65124414	65124415	C	T	snv	commonSome,commonAll,	0.338458	NLN	+	0.00820599	NM_020726	2737	-651	utr3	2-quartet	TCCATTAGAGAAACGGTTGGAAAATATGAGGAGGATTTAG	TCCATTAGAGAAATGGTTGGAAAATATGAGGAGGATTTAG	-0.6	-2.5	0	0	0	0
chr5:174955165-174955195	rs273080	chr5	174955173	174955174	G	A	snv	commonSome,commonAll,	0.339257	SFXN1	+	0.0127288	NM_022754	389	408	utr3	Others	CTTGGCCTCCCAAGGTGCTGGGATTACAAGCGTGAGCCAC	CTTGGCCTCCCAAAGTGCTGGGATTACAAGCGTGAGCCAC	-4.3	-4.3	0	0	0	0
chr2:69550024-69550054	rs7579532	chr2	69550035	69550036	C	T	snv	refIsMinor,clinvar,clinvarBenign,commonSome,commonAll,	0.341254	GFPT1	-	1.26763e+08	NM_002056	-523	-1178	utr3	bulge	AGGGTGAGAGAATGGGAAGATGAAGTGGAGGCGGGTTGTT	AGGGTGAGAGAATGGGAAGATGGAGTGGAGGCGGGTTGTT	2.8	2.8	0	0	0	0
chr19:14492247-14492277	rs2302997	chr19	14492264	14492265	T	C	snv	commonSome,commonAll,	0.343251	CD97	+	0.00826633	NM_001784	-2330	-2869	utr5	Others	CGGGACAGCCTGCACAGCTGCCTAGCCTGTGGAGACGGGA	CGGGACAGCCTGCACAGCTGCCCAGCCTGTGGAGACGGGA	-6.1	-5.6	1	1	0	0
chrX:152141535-152141565	rs11582	chrX	152141538	152141539	G	T	snv	commonSome,commonAll,	0.343841	ZNF185	+	0.00619691	NM_001178115	666	-433	utr3	Others	TATTTGTAGTGGATTTCCTCTGGAGGGCATGTACCCACAC	TATTTGTATTGGATTTCCTCTGGAGGGCATGTACCCACAC	-1.9	-0.7	0	0	0	0
chrX:6967147-6967177	rs6982	chrX	6967174	6967175	G	A	snv	commonSome,commonAll,	0.344106	HDHD1	-	6.98421e+09	NM_012080	327	-164	utr3	Others	ACAAACCGTAGGAATGTATGTGTGCGTGTGGTGGAGTGAT	ACAAACTGTAGGAATGTATGTGTGCGTGTGGTGGAGTGAT	-1.8	-1.6	1	1	0	0
chr1:233749882-233749912	rs3831930	chr1	233749895	233749896	T	C	snv	refIsMinor,diffMajor,commonSome,rareSome,overlapDiffClass,	0.345847	KCNK1	+	0.000184844	NM_002245	-1218	-1977	utr5	2-quartet	CCGGTCTGCGGCGTTGGCCTTGGCGGCGGCGGTGGAGAAG	CCGGTCTGCGGCGTTGGCTTTGGCGGCGGCGGTGGAGAAG	-4	-4.7	0	0	0	0
chr3:14526650-14526680	rs1126666	chr3	14526655	14526656	A	G	snv	refIsMinor,diffMajor,commonSome,commonAll,	0.346446	SLC6A6	+	0.000590576	NM_003043	14	-4151	utr3	Others	AATTGTGGGTATGTGTGCGTGCGTGTGTGTGTGTGTGTGT	AATTGTGGGTGTGTGTGCGTGCGTGTGTGTGTGTGTGTGT	2.8	1600	0	0	0	0
chr1:23670790-23670820	rs12409193	chr1	23670802	23670803	G	C	snv	commonSome,commonAll,overlapDiffClass,	0.346645	HNRNPR	-	1.9745e+09	NM_001102397	-1892	-2472	utr5	2-quartet	CGGGATCGCGTCTCAGTCCATCAGGGGGGGGAGGGGGTGG	CGGGATCGCGTCTCAGTCCATGAGGGGGGGGAGGGGGTGG	-1	-1.5	0	0	0	0
chr2:55277638-55277668	rs6545468	chr2	55277640	55277641	C	G	snv	commonSome,commonAll,	0.348642	RTN4	-	0.00125661	NM_153828	-1472	-2269	utr5	2-quartet	CACTCCTAGCTCATCTGGGCGGCGGCGGCAAGTGGGGACA	CACTCCTAGCTCATCTGGGCGGCGGCGGCAACTGGGGACA	-2.4	-1.5	1	1	0	0
chr22:37764227-37764257	rs3752518	chr22	37764252	37764253	T	C	snv	commonSome,commonAll,	0.353834	ELFN2	-	0.00788174	NM_052906	-156	-205	utr3	Others	CTGGGCTCAGGCCCTGGGCTCTGAACCTGTGAACCCTTGC	CTGGGCTCGGGCCCTGGGCTCTGAACCTGTGAACCCTTGC	-4.8	-3.1	2	2	0	0
chr9:95087797-95087827	rs10123342	chr9	95087823	95087824	T	G	snv	commonSome,commonAll,	0.353834	CENPP	+	0.00484626	NM_001012267	-1446	-1480	utr5	Others	GCAAAAGAGCCTAAACCAAAATCCCCTAGTTTCTATTGAA	GCAAAAGAGCCTAAACCAAAATCCCCTAGTTGCTATTGAA	-0.2	0.1	1	1	0	0
chr16:57722828-57722858	rs7193154	chr16	57722832	57722833	C	T	snv	commonSome,commonAll,	0.354433	GPR97	+	5.50298e+07	NM_170776	406	-412	utr3	bulge	CCTCAGGCACTGGGGGTTTGTTTTGGGGGGTGGGAGTTGA	CCTCAGGCATTGGGGGTTTGTTTTGGGGGGTGGGAGTTGA	-5.4	-2.8	0	0	0	0
chr9:133996495-133996525	rs353510	chr9	133996502	133996503	A	T	snv	refIsMinor,commonSome,commonAll,	0.354633	AIF1L	+	0.000799803	NM_031426	-189	-1988	utr3	2-quartet	CTTTTAGGGAGGTTACTGAGGGGACCAGGATGGGAGAATG	CTTTTAGGGAGGATACTGAGGGGACCAGGATGGGAGAATG	-0.8	-2	1	1	0	0
chr5:43313547-43313577	rs12514399	chr5	43313569	43313570	C	T	snv	refIsMinor,diffMajor,commonSome,commonAll,	0.359225	HMGCS1	-	0.000739677	NM_002130	-1788	-3374	utr5	2-quartet	CGACTCTCGGCGGTGCCGGAGTCGGGTGGGTTGGCGGCTA	CGACTCTCGGCAGTGCCGGAGTCGGGTGGGTTGGCGGCTA	-8.5	-8.5	0	0	0	0
chr1:46598266-46598296	rs1707303	chr1	46598272	46598273	C	A	snv	refIsMinor,commonSome,commonAll,	0.361022	PIK3R3	-	0.00862019	NM_003629	-2094	-5537	utr5	bulge	GGCAGAGCTTGAGGGCAGTTGGTGCGGTCGGGTTGGTTCT	GGCAGAGCTTGAGGGCAGTTGGTGCGGGCGGGTTGGTTCT	-0.9	-0.9	0	0	0	0
chr2:99813607-99813637	rs13798	chr2	99813613	99813614	C	T	snv	refIsMinor,commonSome,commonAll,	0.365615	MRPL30	+	0.00320198	NM_145212	455	-241	utr3	Others	CTTTTCTATTTTAGATACCTGGAGGGGTGGGGAGAAGTAA	CTTTTCTATTTCAGATACCTGGAGGGGTGGGGAGAAGTAA	-0.1	-0.1	0	0	0	0
chr20:34537881-34537911	rs6579266	chr20	34537886	34537887	G	A	snv	commonSome,commonAll,overlapDiffClass,	0.367812	PHF20	+	0.000204958	NM_016436	-102	-359	utr3	bulge	AAGCAGGAGAGGTGCTGGAACCTGGGAGGCGGAGGTTGAA	AAGCAGGAGAAGTGCTGGAACCTGGGAGGCGGAGGTTGAA	-1.4	-1.4	1	1	0	0
chr20:42741676-42741706	rs6130531	chr20	42741688	42741689	G	A	snv	commonSome,commonAll,overlapDiffClass,	0.373602	JPH2	-	0.00671801	NM_020433	88	-1317	utr3	PQs_7	GGCTGAGGCCTCCCAGGGAAGCTGGGTGGGGTGGGTGTTG	GGCTGAGGCCTCCCAGGGAAGTTGGGTGGGGTGGGTGTTG	-4.1	-4.6	0	0	1	1
chr19:39944069-39944099	rs1130180	chr19	39944081	39944082	T	C	snv	refIsMinor,commonSome,commonAll,overlapDiffClass,	0.376997	SUPT5H	+	0.00348105	NM_001111020	-3324	-3330	cds	2-quartet	GAAGAGGAGGAGGAATACGATGAGGAAGAGGAGGAAGAAG	GAAGAGGAGGAGGAATATGATGAGGAAGAGGAGGAAGAAG	3.1	3.1	0	0	0	0
chr16:85709595-85709625	rs8571	chr16	85709609	85709610	G	A	snv	commonSome,commonAll,overlapDiffClass,	0.377796	KIAA0182	+	4.2103e+09	NM_001134473	-39	-162	utr3	2-quartet	ATAACAGTAAACCCCATACGCAGGTGGGAGGGAGGAACAC	ATAACAGTAAACCCCATACACAGGTGGGAGGGAGGAACAC	-1.4	-1.4	3	3	0	0
chr10:105358428-105358458	rs9521	chr10	105358457	105358458	C	G	snv	commonSome,commonAll,	0.379593	SH3PXD2A	-	0.00158764	NM_014631	-16	519	utr3	2-quartet	TGCCGGCAGCAGGCAGAGGAGGGAGGGGGCCTAGGGCTCT	TGCCCGCAGCAGGCAGAGGAGGGAGGGGGCCTAGGGCTCT	-4.2	-3.4	0	0	0	0
chr11:77927093-77927123	rs2511162	chr11	77927100	77927101	A	G	snv	commonSome,commonAll,	0.38738	GAB2	-	0.00150532	NM_080491	29	-725	utr3	2-quartet	TCCTCTGTAACTTCTTTCTGGGGGATTGGGGTGGGCAGTA	TCCTCTGTAACTTCTTTCTGGGGGATCGGGGTGGGCAGTA	1.2	1.2	1	1	0	0
chr19:2430210-2430240	rs743578	chr19	2430231	2430232	T	C	snv	commonSome,commonAll,	0.38778	LMNB2	-	0.000207861	NM_032737	552	-2028	utr3	2-quartet	CCTGACTGTGCAAGGCCAACAGGGCAGGGGAGGGGAAGAC	CCTGACTGTGCAGGGCCAACAGGGCAGGGGAGGGGAAGAC	-3.9	-3.9	1	1	0	1
chr3:39184342-39184372	rs704960	chr3	39184352	39184353	T	C	snv	refIsMinor,commonSome,commonAll,overlapDiffClass,	0.38778	CSRNP1	-	0.0059364	NM_033027	130	-976	utr3	bulge	TTTTCTGTGCTGAAGAGAGGACTGGGGGGAGGGGGCTTCC	TTTTCTGTGCTGAAGAGAGGACTAGGGGGAGGGGGCTTCC	-1.5	-1.5	1	1	0	0
chr2:135209116-135209146	rs2439568	chr2	135209141	135209142	A	G	snv	refIsMinor,commonSome,commonAll,	0.388578	MGAT5	+	0.00408509	NM_002410	138	-303	utr3	bulge	AAGGTGCCCCTGTGTGGGCTGGAAGCCTGCGGAGGTTTTG	AAGGTGCCCCTGTGTGGGCTGGAAGCCTGCAGAGGTTTTG	-2.9	-6.6	0	0	0	0
chr19:11276241-11276271	rs11668313	chr19	11276255	11276256	T	C	snv	commonSome,commonAll,overlapDiffClass,	0.39377	KANK2	-	0.0065261	NM_001136191	538	-1273	utr3	Others	ACCCTGTCTCAAGAAAGAAAAGAAAAAGAGACAAATTACC	ACCCTGTCTCAAGAAAGAAGAGAAAAAGAGACAAATTACC	-2.5	-2.5	1	1	0	0
chr1:162356470-162356500	rs1047802	chr1	162356486	162356487	G	T	snv	commonSome,commonAll,overlapDiffClass,	0.40016	C1orf226	+	0.000140975	NM_001085375	467	-83	utr3	2-quartet	GAAGAAGATTGGCTCCAGTTCGGAGGAGGAGGAGGAAGAT	GAAGAAGATTGGCTCCAGTTCTGAGGAGGAGGAGGAAGAT	-1.9	-1.1	0	0	0	0
chr14:21558530-21558560	rs6571653	chr14	21558557	21558558	G	C	snv	commonSome,commonAll,overlapDiffClass,	0.40016	ZNF219	-	0.00830917	NM_001101672	-28	-269	utr3	bulge	GGAAGGCGCGGCGGGCGTAGGAGGGTGGGCTGGCGGTACC	GGAAGGGGCGGCGGGCGTAGGAGGGTGGGCTGGCGGTACC	-2	-0.1	0	0	0	1
chr14:21945393-21945423	rs2282046	chr14	21945414	21945415	A	G	snv	commonSome,commonAll,overlapDiffClass,	0.401757	TOX4	+	2.75547e+09	NM_014828	-2044	-2218	utr5	long_loop	GGCGGTGGGAGCGATGAGGGTCTGAGACGGTGGGAGCGGT	GGCGGTGGGAGCGATGAGGGTCTGAGGCGGTGGGAGCGGT	0.7	0.8	0	0	0	0
chr3:47892577-47892607	rs1061003	chr3	47892578	47892579	G	C	snv	commonSome,commonAll,	0.411741	MAP4	-	1.06439e+09	NM_002375	477	-364	utr3	long_loop	GCTGGGATGAAAGTGGGAAGGAAACAGGGTTGCGTAGTCA	GCTGGGATGAAAGTGGGAAGGAAACAGGGTTGGGTAGTCA	1	1	1	1	0	0
chr19:7978402-7978432	rs3679	chr19	7978429	7978430	C	T	snv	refIsMinor,commonSome,commonAll,	0.414137	MAP2K7	+	0.000555894	NM_145185	-268	-908	utr3	PQs_7	GTGGGGGCCGGGCTGAGGGTGGGGGTGCGAGGTGGTCACT	GTGGGGGCCGGGCTGAGGGTGGGGGTGCGAGGCGGTCACT	0.8	-1.2	0	0	1	1
chr6:33739998-33740028	rs2296743	chr6	33740024	33740025	C	T	snv	refIsMinor,diffMajor,commonSome,commonAll,	0.414137	LEMD2	-	6.76467e+07	NM_001143944	3	-802	utr3	long_loop	TGGGGCAGGGATGGTGTTTCGGGTGGCGGGATGGGGAGCA	TGGGGCAAGGATGGTGTTTCGGGTGGCGGGATGGGGAGCA	0.7	1.2	0	0	0	0
chr1:990262-990292	rs4275402	chr1	990279	990280	T	C	snv	refIsMinor,clinvar,clinvarBenign,commonSome,commonAll,	0.414736	AGRN	+	6.71265e+09	NM_198576	-142	-1182	cds	bulge	GCTTTGTGGGCTGCTTGCGGGACGTGGTGGTGGGCCGGCA	GCTTTGTGGGCTGCTTGCGGGATGTGGTGGTGGGCCGGCA	-3.7	-3.7	0	0	0	0
chr16:55620289-55620319	rs1044775	chr16	55620290	55620291	C	T	snv	commonSome,commonAll,	0.415535	LPCAT2	+	0.00110545	NM_017839	1368	-238	utr3	Others	ATTAACCTTATTATTTTCTTATTATTTTAAAAGAATCTAT	ATTAACTTTATTATTTTCTTATTATTTTAAAAGAATCTAT	-1.6	-1.6	1	1	0	0
chr10:73770569-73770599	rs4148948	chr10	73770577	73770578	G	A	snv	refIsMinor,diffMajor,clinvar,clinvarBenign,commonSome,commonAll,overlapDiffClass,	0.419928	CHST3	+	0.000793431	NM_004273	482	-2688	utr3	PQs_7	ATGTGGAGGTCGGAGGGGCTGGGACTGGGGAGGGGGCAGC	ATGTGGAGGTCGGGGGGGCTGGGACTGGGGAGGGGGCAGC	1.2	1.2	1	1	1	1
chr22:18572098-18572128	rs456551	chr22	18572105	18572106	T	A	snv	refIsMinor,diffMajor,clinvar,clinvarBenign,commonSome,commonAll,	0.423123	PEX26	+	0.000167084	NM_017929	36	-35	utr3	bulge	AATCAGGTGAGCTGGAAGGGATGTGGGGGGCGGGGCAGAC	AATCAGGTGAGCAGGAAGGGATGTGGGGGGCGGGGCAGAC	1.2	1.3	0	0	0	0
chr8:98943441-98943471	rs2290470	chr8	98943445	98943446	T	C	snv	refIsMinor,diffMajor,commonSome,commonAll,	0.427117	MATN2	+	0.00741476	NM_030583	-2440	-2860	cds	Others	CACCATGACTGGGCTGGCCATCCAGTATGCCCTGAACATC	CACCATGACCGGGCTGGCCATCCAGTATGCCCTGAACATC	-3.2	-3.7	2	2	0	0
chr1:184763522-184763552	rs14426	chr1	184763524	184763525	G	A	snv	refIsMinor,diffMajor,commonSome,commonAll,	0.427516	FAM129A	-	0.00206142	NM_052966	189	-3336	utr3	2-quartet	GATTCAAGAGAAGCTAAGCGGAAATGGAGGGTGGAAGGTG	GATTCAAGAGAAGCTAAGCGGAAATGGAGGGCGGAAGGTG	0.2	0.2	0	0	0	0
chr7:44808002-44808032	rs1050327	chr7	44808016	44808017	A	G	snv	refIsMinor,diffMajor,commonSome,commonAll,	0.428714	ZMIZ2	+	1.1594e+09	NM_174929	148	-237	utr3	bulge	AGTGAGCTTCGGCCTGGCCGAGGTGGGTGGGTGGGCTCTC	AGTGAGCTTCGGCCTGGCCAAGGTGGGTGGGTGGGCTCTC	-4	-0.5	0	0	0	0
chr6:151336717-151336747	rs509474	chr6	151336738	151336739	G	C	snv	refIsMinor,diffMajor,commonSome,commonAll,	0.429712	MTHFD1L	+	0.000787277	NM_001242768	-494	-802	cds	Others	GATGCAGTCCCCTGCTATCACTGGTCCGTTGGTGGAAAAG	GATGCAGTCCCCTGCTATCACTGGTCGGTTGGTGGAAAAG	-2.1	-2.1	0	0	0	0
chr20:42740535-42740565	rs1055727	chr20	42740550	42740551	C	T	snv	refIsMinor,diffMajor,commonSome,commonAll,	0.430911	JPH2	-	0.00146264	NM_020433	-169	-176	utr3	bulge	CAAGACTCCTGGAGCATGAGGGGAATGGGGCGGGGCCACT	CAAGACTCCTGGAGCATGGGGGGAATGGGGCGGGGCCACT	-1.4	-0.5	1	1	0	0
chr17:75496452-75496482	rs445507	chr17	75496459	75496460	T	C	snv	refIsMinor,diffMajor,clinvar,clinvarBenign,commonSome,commonAll,	0.432109	SEPT9	+	4.82396e+07	NM_001113491	71	-167	utr3	PQs_7	AATGTCACTTGGTGGCGGGGTGGGGTGGGGGTGGGCAGCA	AATGTCACTTGGCGGCGGGGTGGGGTGGGGGTGGGCAGCA	0.5	-2	0	0	1	1
chr11:93517852-93517882	rs7116967	chr11	93517873	93517874	G	C	snv	refIsMinor,clinvar,clinvarBenign,commonSome,commonAll,overlapDiffClass,	0.434305	MED17	+	0.0134208	NM_004268	-1820	-2071	cds	bulge	GAGGAGGAGGCGGCGGGGACCGAGGGCGACGCGCAGGAGT	GAGGAGGAGGCGGCGGGGACCGAGGGGGACGCGCAGGAGT	-4.2	-2.5	1	1	0	0
chr22:31303681-31303711	rs8004	chr22	31303707	31303708	G	A	snv	commonSome,commonAll,overlapDiffClass,	0.435304	OSBP2	+	3.41625e+07	NM_030758	23	60	utr3	bulge	GCGGGGCGGGGTGGGGCAGGATGGCCCCACTGGGGCTCCT	GCGGGGCGGGGTGGGGCAGGATGGCCCCACTAGGGCTCCT	-10.4	-10.4	0	0	0	0
chr1:24798360-24798390	rs195729	chr1	24798382	24798383	C	T	snv	refIsMinor,diffMajor,commonSome,commonAll,	0.436901	NIPAL3	+	0.000598298	NM_020448	-874	-1056	utr3	2-quartet	TGATTTTTCTAAAGCTGGGAGTGGAGGCAGGAGGGAGAAA	TGATTTTTCTAAAGCTGGGAGTGGAGGTAGGAGGGAGAAA	1	1	0	0	0	0
chr7:133978390-133978420	rs1035328	chr7	133978418	133978419	T	C	snv	commonSome,commonAll,	0.439896	SLC35B4	-	2.00466e+09	NM_032826	518	-4283	utr3	long_loop	CTCACAGGGCAGAAGGGTGGGTCTCAAGTGGGAGGATAAG	CTCACGGGGCAGAAGGGTGGGTCTCAAGTGGGAGGATAAG	-1.5	0.4	0	0	0	0
chr14:104001488-104001518	rs2756119	chr14	104001516	104001517	G	A	snv	commonSome,commonAll,overlapDiffClass,	0.440695	TRMT61A	+	0.00170637	NM_152307	202	-1869	utr3	long_loop	GGGCCTAAGCAGGAAGGGGGTGGAGGAGGGAGGGGGGCAT	GGGCCTAAGCAGGAAGGGGGTGGAGGAGGGAGGAGGGCAT	-0.1	-0.1	0	0	0	0
chrX:48436993-48437023	rs235827	chrX	48437017	48437018	T	C	snv	refIsMinor,diffMajor,commonSome,commonAll,	0.44106	RBM3	+	0.00017619	NM_006743	397	-2501	utr3	bulge	GGAGGCTTGGAGAATATTTGGTTGGTGGGTGGGCAGGGAC	GGAGGCTTGGAGAATATTTGGTTGGTGGGCGGGCAGGGAC	2	2.2	0	0	0	0
chr16:10625883-10625913	rs7195563	chr16	10625886	10625887	C	T	snv	refIsMinor,diffMajor,commonSome,commonAll,	0.441494	EMP2	-	0.000194488	NM_001424	295	-1729	utr3	G_40	AATGCTGGGGTATCGTCATGTGGAGATGGGGAGGTGAATG	AATGCTGGGGTATCGTCATGTGGAGATGGGAAGGTGAATG	1.1	1.1	0	0	0	0
chr15:51783808-51783838	rs10851500	chr15	51783819	51783820	T	C	snv	refIsMinor,diffMajor,commonSome,commonAll,	0.445088	DMXL2	-	0.000394779	NM_001174116	-4760	-5368	cds	2-quartet	AATTAAGAGCTATGGGCATAGGATGGTGGGTGAGGAACAT	AATTAAGAGCTATGGGCATAGGGTGGTGGGTGAGGAACAT	0.3	0.3	1	1	0	0
chr3:160283116-160283146	rs4621370	chr3	160283125	160283126	A	C	snv	refIsMinor,diffMajor,commonSome,commonAll,	0.446685	KPNA4	-	0.00691798	NM_002268	-1635	-1699	utr5	2-quartet	TCCTGGGAGTGTCGGTGCGGCGCGTTGGTTGGGGCGGATC	TCCTGGGAGTGTCGGTGCGGCGCGGTGGTTGGGGCGGATC	-0.7	-0.7	0	0	0	0
chr3:38531193-38531223	rs7374458	chr3	38531210	38531211	T	G	snv	refIsMinor,diffMajor,clinvar,clinvarBenign,commonSome,commonAll,	0.447284	ACVR2B	+	0.00107264	NM_001106	234	-3390	utr3	G_40	ACAGAAATTGTATAGGGGTGCCTATTGGGGTGGGATGGGA	ACAGAAATTGTATAGGGGTGCCGATTGGGGTGGGATGGGA	-0.6	-0.6	0	0	0	0
chr21:44453006-44453036	rs2839629	chr21	44453021	44453022	A	G	snv	refIsMinor,diffMajor,commonSome,commonAll,	0.449681	PKNOX1	+	0.00135526	NM_004571	-136	-634	utr3	Others	TCACTGCCCAGCATGTTTGAGGTCAGTTGGCACCTTAAAA	TCACTGCCCAGCATGTTTGAAGTCAGTTGGCACCTTAAAA	-4	-0.5	0	0	0	0
chr2:237033075-237033105	rs11894960	chr2	237033076	237033077	A	T	snv	commonSome,commonAll,	0.44988	AGAP1	+	2.40694e+08	NM_014914	-458	-771	utr3	PQs_7	GGTGGCACAAGGGATGGGGACGCGAGGGGGAGGGGAGGCG	GGTGGCTCAAGGGATGGGGACGCGAGGGGGAGGGGAGGCG	-1.2	-1.2	0	0	1	1
chr3:183528425-183528455	rs263024	chr3	183528441	183528442	C	T	snv	commonSome,commonAll,	0.453275	YEATS2	+	0.001027	NM_018023	-888	-1402	utr3	2-quartet	GTAACTGAGGACCCTGCTGCTCGGGAAGGAGGTGGTTTCC	GTAACTGAGGACCCTGCTGCTTGGGAAGGAGGTGGTTTCC	-3.1	-3.1	2	2	0	0
chr8:103661314-103661344	rs6935	chr8	103661341	103661342	G	T	snv	refIsMinor,diffMajor,commonSome,commonAll,	0.458067	KLF10	-	4.21868e+08	NM_005655	-26	-282	utr3	2-quartet	TATAGGCGTTTTTTGGGGATGTGGAGGTAGTTGGGTAGAA	TATAGGAGTTTTTTGGGGATGTGGAGGTAGTTGGGTAGAA	3	3	0	0	0	0
chr17:79524766-79524796	rs8068511	chr17	79524789	79524790	A	T	snv	refIsMinor,commonSome,commonAll,	0.458267	NPLOC4	-	0.00110136	NM_017921	273	-834	utr3	2-quartet	CGGCAGAGCTATTGTGGAGGGTCAGGAAGGGTGGAGAGGA	CGGCAGAGCTTTTGTGGAGGGTCAGGAAGGGTGGAGAGGA	1.3	1.3	0	0	0	0
chr3:111836550-111836580	rs11824	chr3	111836565	111836566	C	T	snv	refIsMinor,diffMajor,commonSome,commonAll,overlapDiffClass,	0.458267	C3orf52	+	0.00613915	NM_024616	-248	-456	utr3	2-quartet	TGGAAGCTTTTGCCAGCTATTTGGGGGGTAGGAGGAATAT	TGGAAGCTTTTGCCAGCTATCTGGGGGGTAGGAGGAATAT	-1.1	-1.8	0	0	0	0
chr5:78621656-78621686	rs3733886	chr5	78621667	78621668	G	T	snv	refIsMinor,diffMajor,commonSome,commonAll,	0.459465	JMY	+	5.69354e+08	NM_152405	93	-1324	utr3	bulge	GTTATGTAAGCAAAGGGTTTGGAAAGGCGGGAGGGAGTCT	GTTATGTAAGCAAAGGTTTTGGAAAGGCGGGAGGGAGTCT	0.5	0.5	0	0	0	0
chr2:128621069-128621099	rs1045832	chr2	128621093	128621094	G	A	snv	refIsMinor,diffMajor,commonSome,commonAll,	0.463259	AMMECR1L	-	0.000546719	NM_001199140	-248	-437	utr3	2-quartet	TTTCTTCTGTCAGGAATGGGGAAGGGGAGTGGGGGCACAA	TTTCTTCTGCCAGGAATGGGGAAGGGGAGTGGGGGCACAA	-0.2	-1.4	0	0	0	0
chr1:249105152-249105182	rs4307600	chr1	249105162	249105163	T	C	snv	refIsMinor,diffMajor,commonSome,commonAll,	0.464257	SH3BP5L	-	0.00124309	NM_030645	-5	-482	utr3	Others	CTGACTCAGCACCCTCCTGCAGGACGGGGTTAGGGAATTT	CTGACTCAGCACCCTCCTGCAGGGCGGGGTTAGGGAATTT	-1.3	-4.4	1	1	0	0
chr22:39080217-39080247	rs1056661	chr22	39080244	39080245	A	G	snv	commonSome,commonAll,	0.464657	TOMM22	+	0.000779726	NM_020243	-245	-223	utr3	Others	TTTTTTTTTTTAAAGAATGGAGTTGTTGGGGCAGGACATG	TTTTTTTTTTTAAAGAATGGAGTTGTTGGGGCGGGACATG	-0.4	-0.4	1	1	0	0
chr11:118769005-118769035	rs11217081	chr11	118769031	118769032	G	A	snv	refIsMinor,diffMajor,commonSome,commonAll,overlapDiffClass,	0.465455	BCL9L	-	0.000377801	NM_182557	-41	-534	utr3	PQs_7	TGGGTCGCGGGGTGGGGTGGAGGGGGTGGGAGGGGGCTTG	TGGGTCGTGGGGTGGGGTGGAGGGGGTGGGAGGGGGCTTG	2.8	2.8	0	0	1	1
chr22:44890176-44890206	rs6519877	chr22	44890191	44890192	T	G	snv	refIsMinor,diffMajor,commonSome,commonAll,	0.465855	LDOC1L	-	0.000147065	NM_032287	731	-1660	utr3	G_40	TGATAGGGGATCAGGCTAAGAAAGTGGGGGAAGGGAGATG	TGATAGGGGATCAGGCTACGAAAGTGGGGGAAGGGAGATG	-1	-1	0	0	0	0
chr1:218617114-218617144	rs1046017	chr1	218617134	218617135	C	G	snv	clinvar,clinvarBenign,commonSome,commonAll,	0.469649	TGFB2	+	497736	NM_003238	101	-175	utr3	bulge	TGCCATGGGAGGGGGGTGGAGGTGGCAAGGAAGGGGTGAA	TGCCATGGGAGGGGGGTGGAGGTGGGAAGGAAGGGGTGAA	-2.3	0.9	0	0	0	1
chr19:19619528-19619558	rs6909	chr19	19619541	19619542	A	G	snv	commonSome,commonAll,overlapDiffClass,	0.473642	GATAD2A	+	0.00122629	NM_017660	0	-158	utr3	bulge	TAGTGCAGGGTATTGGGGAGGCTCTTTGGGTGTGGAGGCT	TAGTGCAGGGTATTGGGGGGGCTCTTTGGGTGTGGAGGCT	-4	-1.2	0	0	0	1
chr16:8948458-8948488	rs2447924	chr16	8948472	8948473	A	C	snv	refIsMinor,diffMajor,commonSome,commonAll,overlapDiffClass,	0.475439	CARHSP1	-	0.000138943	NM_014316	-36	298	utr3	bulge	GGAGCTGGCTTGAAGTGGGTGGGGAAAGGCGGGGGTGGCG	GGAGCTGGCTTGAAGTGGGGGGGGAAAGGCGGGGGTGGCG	1.1	1.1	0	0	0	0
chr13:40229879-40229909	rs3812882	chr13	40229890	40229891	G	A	snv	refIsMinor,diffMajor,clinvar,clinvarBenign,commonSome,commonAll,	0.484425	COG6	+	0.000884448	NM_020751	-2788	-3313	cds	2-quartet	CAGCGGGGAAGTGGTCGCAGTGTCTGCGACCGGGGCTGCC	CAGCGGGGAAGTGGTCACAGTGTCTGCGACCGGGGCTGCC	-9.5	-6.4	0	0	0	0
chr22:35949329-35949359	rs6518958	chr22	35949333	35949334	A	G	snv	refIsMinor,diffMajor,commonSome,commonAll,	0.485823	RASD2	+	0.00928383	NM_014310	5	-665	utr3	long_loop	CTGGGAGGGATCCGACAGAAAAGCTCAGGGCGGGTCTTCT	CTGGGAGGGGTCCGACAGAAAAGCTCAGGGCGGGTCTTCT	-2.3	-0.2	0	0	0	0
chr17:17715074-17715104	rs11868035	chr17	17715100	17715101	A	G	snv	refIsMinor,diffMajor,commonSome,commonAll,overlapDiffClass,	0.48762	SREBF1	-	7.92163e+09	NM_001005291	287	306	utr3	2-quartet	TCCCCATCAGGTCCCTGGGTGGCACGGGAGGATGGACTGA	TCCCCATTAGGTCCCTGGGTGGCACGGGAGGATGGACTGA	-3.6	-2.9	1	1	0	0
chr15:77338773-77338803	rs8032	chr15	77338783	77338784	G	C	snv	refIsMinor,diffMajor,commonSome,commonAll,	0.489816	TSPAN3	-	0.000704002	NM_005724	19	-380	utr3	2-quartet	GAACTCTTGGCCAAAGGTTTTTGCGGGGAGGAGGAGGAAA	GAACTCTTGGCCAAAGGTTTTTGGGGGGAGGAGGAGGAAA	-0.9	-2.3	1	1	0	0
chr4:39124722-39124752	rs1061377	chr4	39124749	39124750	A	C	snv	refIsMinor,commonSome,commonAll,	0.490216	KLHL5	+	0.013282	NM_001007075	935	913	utr3	Others	AGAAGCATTGTTGCCAACAATTTAGATGACCTCGATGAAA	AGAAGCATTGTTGCCAACAATTTAGATGACCTAGATGAAA	-1.9	-1.9	1	1	0	0
chr3:39185071-39185101	rs1274957	chr3	39185076	39185077	G	A	snv	refIsMinor,diffMajor,commonSome,commonAll,	0.491214	CSRNP1	-	0.000471468	NM_033027	-563	-1705	cds	bulge	GGGAGGAGGAGGAAGAGGAGGAAGGGAGCGTGGGGAACCT	GGGAGGAGGAGGAAGAGGAGGAAGGGAGTGTGGGGAACCT	-0.5	-0.5	1	1	0	0
chr14:74340778-74340808	rs11159042	chr14	74340796	74340797	T	A	snv	refIsMinor,diffMajor,commonSome,commonAll,	0.495008	PTGR2	+	3.44663e+08	NM_152444	-919	-1184	cds	2-quartet	CAGCTATCTCAAGTCGTTGATGGAGGAGGTATTGGAATTA	CAGCTATCTCAAGTCGTTGATGGTGGAGGTATTGGAATTA	-0.7	-0.7	0	0	0	0
chr1:46598266-46598296	rs1707304	chr1	46598268	46598269	C	A	snv	commonSome,commonAll,	0.497404	PIK3R3	-	0.00862019	NM_003629	-2094	-5537	utr5	bulge	GGCAGAGCTTGAGGGCAGTTGGTGCGGTCGGGTTGGTTCT	GGCAGAGCTTGAGGGCAGTTGGTGCGGTCGGTTTGGTTCT	-0.9	-0.9	0	0	0	0
chr3:188603926-188603956	rs9290882	chr3	188603947	188603948	A	G	snv	refIsMinor,diffMajor,commonSome,commonAll,overlapDiffClass,	0.498802	LPP	+	0.013359	NM_001167672	-765	-4483	utr3	bulge	ACACTCTGGGGACTGTTGTGGGGTGGAGGGAGGAGGGAGG	ACACTCTGGGGACTGTTGTGGGGTGGGGGGAGGAGGGAGG	-1.4	-1.4	1	1	0	0

## Sheet: n -> n-1
Quadruplex Region	Variant name	Variant Position (chrom)	Variant position (chromStart)	Variant position (chromEnd)	Reference Allele	Variant Allele	class	ucscNotes	MAF	Gene	Strand	p.value	Transcript	miRNA_dists	polyA_dists	annotation	class.1	Quadruplex Sequence with Reference Allele	Quadruplex Sequence with Variant Allele	Free Energy (delta G value) of G4-Quadruplex Sequence with Reference Allele	Free Energy (delta G value) of G4-Quadruplex Sequence with Variant Allele	DRACH Motif Number within Reference Sequence	DRACH Motif Number within Variant Sequence	G4-Quadruplex Number within Reference Sequence	G4-Quadruplex Number within Variant Sequence
chr1:202554249-202554279	rs559825588	chr1	202554260	202554261	C	T	snv	commonSome,rareSome,	0.0115815	PPP1R12B	+	0.00772413	NM_002481	2047	-3396	utr3	Others	TCCCGAGCAGCTAGGACTGCAGGTGTGCACCACCATGCCC	TCCCGAGCAGCTAGGATTGCAGGTGTGCACCACCATGCCC	-2.6	-2.6	1	0	0	0
chr17:37793423-37793453	rs375903988	chr17	37793436	37793437	A	G	snv	commonSome,commonAll,	0.0123802	STARD3	+	0.00100277	NM_006804	-1444	-1965	utr5	2-quartet	CTGAGGCCGCGGAGCCGGACTGCGGTTGGGGCGGGAAGAG	CTGAGGCCGCGGAGCCGGGCTGCGGTTGGGGCGGGAAGAG	-4.5	-5.3	1	0	0	0
chr1:44133645-44133675	rs74070653	chr1	44133646	44133647	A	G	snv	commonSome,rareSome,	0.0139776	KDM4A	+	0.000989845	NM_014663	-2542	-3173	cds	2-quartet	GAGGACATGGAAGGGGTGGAGGATGGAGAGGAAGGAGACC	GAGGACGTGGAAGGGGTGGAGGATGGAGAGGAAGGAGACC	0.8	0.8	2	1	0	0
chr2:73114549-73114579	rs184034436	chr2	73114554	73114555	C	G	snv	clinvar,clinvarBenign,commonSome,rareSome,	0.0179712	SPR	+	6.23107e+09	NM_003124	-909	-1367	cds,utr5	bulge	CGGCGGAGAACAGGAGCATGGAGGGCGGGCTGGGGCGTGC	CGGCGGAGAAGAGGAGCATGGAGGGCGGGCTGGGGCGTGC	-0.6	-0.6	1	0	0	0
chr6:83902961-83902991	rs140702813	chr6	83902971	83902972	T	C	snv	commonSome,commonAll,	0.01877	PGM3	-	0.000827954	NM_015599	-1718	-2002	utr5	2-quartet	GGGCCACGTCTGCGGTTCTGAGGACTGGGTTTGGGTGCAG	GGGCCACGTCTGCGGTTCTGAGGGCTGGGTTTGGGTGCAG	-0.7	-0.7	1	0	0	0
chr3:119544728-119544758	rs77368793	chr3	119544739	119544740	C	G	snv	commonSome,rareSome,overlapDiffClass,	0.0199681	GSK3B	-	0.00112316	NM_001146156	-12	-593	utr3	2-quartet	GGCTGATGAGCCCAGAGGAAGGGGACAGGTCAGGGATACA	GGCTGATGAGCCCAGAGGAAGGCGACAGGTCAGGGATACA	-2.4	-2.4	1	0	0	0
chr22:45590872-45590902	rs2350624	chr22	45590891	45590892	T	C	snv	commonSome,rareSome,	0.0201677	KIAA0930	-	0.00440315	NM_001009880	741	827	utr3	2-quartet	TAAGGCATGTGAACAGGGCACGCGGTGGGCTGGTGGTTTC	TAAGGCATGTGAACGGGGCACGCGGTGGGCTGGTGGTTTC	-0.6	-0.6	1	0	0	0
chr17:80573450-80573480	rs113693233	chr17	80573465	80573466	G	A	snv	commonSome,rareSome,	0.0313498	WDR45L	-	0.00629377	NM_019613	-125	-974	utr3	2-quartet	TCCATACGGACCTGGGGACTGGGCTGAGAGGGTGGACGAG	TCCATACGGACCTGGGGATTGGGCTGAGAGGGTGGACGAG	-0.1	-0.1	2	1	0	0
chr14:103375528-103375558	rs74082969	chr14	103375539	103375540	A	G	snv	commonSome,rareSome,	0.0323482	TRAF3	+	0.00439104	NM_145725	-1002	-2256	utr3	2-quartet	GCCGTGCTCTGGTGACACACAGGCGGCCAGGTTGGGATTT	GCCGTGCTCTGGTGACGCACAGGCGGCCAGGTTGGGATTT	-2.9	-4.2	1	0	0	0
chr3:195163753-195163783	rs112952348	chr3	195163755	195163756	G	A	snv	commonSome,rareSome,	0.0547125	ACAP2	-	0.0039477	NM_012287	-3330	-3028	utr5	PQs_7	TCTACTTGGGGCGGGAGGAAGAGGGGCGGGACTGGGGCCT	TCTACTTGGGGCGGGAGGAAGAGGGGCGGGATTGGGGCCT	-0.4	-0.4	1	0	1	1
chr20:4680105-4680135	rs62643364	chr20	4680111	4680112	A	G	snv	clinvar,clinvarBenign,commonSome,rareSome,overlapDiffClass,	0.061901	PRNP	+	2.13554e+09	NM_001080123	-1741	-2075	cds	2-quartet	GGTGGCTGGGGACAGCCTCATGGTGGTGGCTGGGGTCAAG	GGTGGCTGGGGGCAGCCTCATGGTGGTGGCTGGGGTCAAG	-5.5	-3.1	1	0	0	0
chr17:33337538-33337568	rs11658051	chr17	33337564	33337565	G	T	snv	commonSome,commonAll,	0.0890575	RFFL	-	0.00727817	NM_001017368	-175	845	utr3	Others	TCTTGAACTCTTGACCTTATGATCCGCCCGCCTCAGCTTC	TCTTGAAATCTTGACCTTATGATCCGCCCGCCTCAGCTTC	0.5	0.5	2	1	0	0
chr7:12370529-12370559	rs2287067	chr7	12370532	12370533	T	C	snv	commonSome,commonAll,overlapDiffClass,	0.284345	VWDE	-	0.00652739	NM_001135924	1	0	utr3	Others	GATATTCCACCCATTCACAATATTTAATAAACTGAATATT	GATATTCCACCCATTCACAATATTTAATAAGCTGAATATT	-0.8	-0.8	1	0	0	0
chr22:38611071-38611101	rs9610915	chr22	38611079	38611080	C	G	snv	refIsMinor,diffMajor,commonSome,commonAll,	0.370008	MAFF	+	3.29833e+09	NM_012323	-861	-1380	utr3	PQs_7	CTGGGAAGGGGAACTTGGGTAGGTTGGGGATGGGGCAGAG	CTGGGAAGGGGAAGTTGGGTAGGTTGGGGATGGGGCAGAG	-0.1	0.6	1	0	1	1
chr19:3053783-3053813	rs425485	chr19	3053801	3053802	C	T	snv	refIsMinor,diffMajor,commonSome,commonAll,	0.403554	AES	-	5.56918e+06	NM_001130	-845	-606	utr3	PQs_7	GCAGGGGGCCGGGACAGGGAGGTTGGGAGGGGGGACAGAG	GCAGGGGGCCGGGACGGGGAGGTTGGGAGGGGGGACAGAG	-0.1	-2.5	2	1	1	1
chrX:153759851-153759881	rs1050757	chrX	153759857	153759858	T	C	snv	clinvar,clinvarBenign,commonSome,commonAll,	0.415364	G6PD	-	1.11552e+07	NM_000402	-69	-227	utr3	PQs_7	AGTGGGGCCAGGGTGGGAGGGAGGGACAAGGGGGAGGAAA	AGTGGGGCCAGGGTGGGAGGGAGGGACGAGGGGGAGGAAA	0.7	0.7	1	0	1	1
chr2:74907946-74907976	rs3771749	chr2	74907963	74907964	G	A	snv	refIsMinor,diffMajor,commonSome,commonAll,	0.466853	SEMA4F	+	0.00141169	NM_004263	-70	-1134	utr3	2-quartet	TATGAGGGATGGGGAGGGAGACAATTGGAATGGGGGCGTT	TATGAGGGATGGGGAGGGAGACGATTGGAATGGGGGCGTT	2	0.4	1	0	0	0
chr16:29998190-29998220	rs4077410	chr16	29998199	29998200	A	G	snv	refIsMinor,diffMajor,commonSome,commonAll,	0.484625	TAOK2	+	0.0102228	NM_016151	-1118	-1475	cds	bulge	GAGGAGGCTGGGACATGGAGCTTGTGGGGGAAGGAGGATG	GAGGAGGCTGGGACGTGGAGCTTGTGGGGGAAGGAGGATG	0	0.7	1	0	0	0
chr1:151288155-151288185	rs1056847	chr1	151288171	151288172	A	G	snv	refIsMinor,diffMajor,commonSome,commonAll,	0.490415	PI4KB	-	0.00440425	NM_002651	-1790	-2349	cds	Others	TTGAGCCCGGCCCCTGACACAGGGCTGTCTCCCTCCAAAA	TTGAGCCCGGCCCCTGATACAGGGCTGTCTCCCTCCAAAA	-3.3	-3.3	1	0	0	0

## Sheet: n -> n+1
Quadruplex Region	Variant name	Variant Position (chrom)	Variant position (chromStart)	Variant position (chromEnd)	Reference Allele	Variant Allele	class	ucscNotes	MAF	Gene	Strand	p.value	Transcript	miRNA_dists	polyA_dists	annotation	class.1	Quadruplex Sequence with Reference Allele	Quadruplex Sequence with Variant Allele	Free Energy (delta G value) of G4-Quadruplex Sequence with Reference Allele	Free Energy (delta G value) of G4-Quadruplex Sequence with Variant Allele	DRACH Motif Number within Reference Sequence	DRACH Motif Number within Variant Sequence	G4-Quadruplex Number within Reference Sequence	G4-Quadruplex Number within Variant Sequence
chr17:37903234-37903264	rs77876670	chr17	37903245	37903246	G	A	snv	commonSome,rareSome,	0.0113818	GRB7	+	0.00039274	NM_005310	-217	-252	utr3	long_loop	CGCGGCCACAGGGGACGGGATGAGGAGCGGGAGGGTTCCG	CGCGGCCACAGGGGACAGGATGAGGAGCGGGAGGGTTCCG	-4.5	-4.5	0	1	0	0
chr17:41478013-41478043	rs10651	chr17	41478016	41478017	T	C	snv	commonSome,rareSome,	0.0125799	ARL4D	+	0.000137214	NM_001661	40	-240	utr3	bulge	ATTTTTAATTGGATGTGTTTGGGGGCGGGGGGATGGAAGT	ATTTTTAACTGGATGTGTTTGGGGGCGGGGGGATGGAAGT	1.8	0.8	0	1	0	0
chr6:26413069-26413099	rs75403944	chr6	26413086	26413087	A	C	snv	commonSome,rareSome,	0.0127796	BTN3A1	+	0.00623549	NM_194441	-405	-2315	utr3	bulge	AAAGCATTAGTGGGCAGAGTGAATATGGGGAGGGAAACAA	AAAGCATTAGTGGGCAGAGTGACTATGGGGAGGGAAACAA	1.2	0.2	1	2	0	0
chr18:11853253-11853283	rs79296340	chr18	11853254	11853255	G	C	snv	commonSome,commonAll,	0.0169728	CHMP1B	+	3.77448e+08	NM_020412	229	146	utr3	2-quartet	ATCTGAGAAGTAAAGAGGTAGGACTGGAAGGAAGGAGAAA	ATCTGACAAGTAAAGAGGTAGGACTGGAAGGAAGGAGAAA	1	1.2	1	2	0	0
chr13:53226975-53227005	rs9591458	chr13	53226978	53226979	G	C	snv	commonSome,commonAll,	0.0195687	SUGT1	+	6.0836e+08	NM_006704	-1175	-1278	utr5	2-quartet	CTCCAGAAGTTTCCCCCTTGGGCGGTGGTGGAGGTGGTAA	CTCCAGAACTTTCCCCCTTGGGCGGTGGTGGAGGTGGTAA	-3.1	-3.3	0	1	0	0
chr5:141318353-141318383	rs113231243	chr5	141318370	141318371	G	A	snv	commonSome,rareSome,	0.0201677	KIAA0141	+	0.000760227	NM_014773	-878	-411	utr3	2-quartet	TGCCTCTTAGGGGCCAGAGCGGGCAGGAGGTTGGATAACA	TGCCTCTTAGGGGCCAGAGCGGACAGGAGGTTGGATAACA	-2.3	-2.3	1	2	0	0
chr17:57477880-57477910	rs55679139	chr17	57477899	57477900	G	A	snv	commonSome,rareSome,	0.0205671	YPEL2	+	0.0126465	NM_001005404	61	-1159	utr3	Others	TTTAATCTGGATCAAGGCTTTGAAGCAATGCCTCTCTGCA	TTTAATCTGGATCAAGGCTTTGAAACAATGCCTCTCTGCA	-4.9	-4.9	0	1	0	0
chr12:49413338-49413368	rs77945935	chr12	49413354	49413355	A	G	snv	clinvar,clinvarBenign,commonSome,rareSome,	0.0241613	MLL2	-	4.26867e+08	NM_003482	0	-554	utr3	PQs_7	GGGCTTGGGCCCTGGGATTGGGAAAAGGGGATGGGGCAGA	GGGCTTGGGCCCTGGGACTGGGAAAAGGGGATGGGGCAGA	-3.7	-3.7	0	1	1	1
chr13:115000372-115000402	rs17337703	chr13	115000381	115000382	G	A	snv	commonSome,rareSome,	0.0257588	CDC16	+	7.79567e+09	NM_003903	-2160	-2151	utr5	PQs_7	GGGCAGTGCACGGGGCCTGGGTGGGGGGTGCGGGTGTGGG	GGGCAGTGCACGGGACCTGGGTGGGGGGTGCGGGTGTGGG	-0.8	-1.6	0	1	1	1
chr19:46268691-46268721	rs7257515	chr19	46268713	46268714	C	T	snv	commonSome,commonAll,overlapDiffClass,	0.0269569	SIX5	-	0.000196936	NM_175875	0	-623	utr3	2-quartet	GTGCTGAAGACGCAGGGACAGGAATGGGAGGGGGGAGCCC	GTGCTGAAGACACAGGGACAGGAATGGGAGGGGGGAGCCC	-0.6	-0.6	1	2	0	0
chr2:121010515-121010545	rs113189263	chr2	121010517	121010518	G	A	snv	commonSome,commonAll,	0.0273562	RALB	+	0.000938773	NM_002881	-1649	-2108	utr5	bulge	GCTGCGGGCCGGGTGCGGACGGCGGAGGCGGCGGGACTGG	GCTGCGGACCGGGTGCGGACGGCGGAGGCGGCGGGACTGG	-6.7	-4.2	1	2	0	0
chr13:115000372-115000402	rs17337710	chr13	115000382	115000383	C	A	snv	commonSome,commonAll,	0.0291534	CDC16	+	7.79567e+09	NM_003903	-2160	-2151	utr5	PQs_7	GGGCAGTGCACGGGGCCTGGGTGGGGGGTGCGGGTGTGGG	GGGCAGTGCACGGGGACTGGGTGGGGGGTGCGGGTGTGGG	-0.8	-0.8	0	1	1	1
chr1:24797724-24797754	rs72882466	chr1	24797736	24797737	G	C	snv	commonSome,rareSome,	0.0335463	NIPAL3	+	0.000453542	NM_020448	546	-1692	utr3	bulge	TGGGCAAAGAAAGGAAAGCCAGGGAAGGTGGTGGGAGATG	TGGGCAAAGAAAGGAAACCCAGGGAAGGTGGTGGGAGATG	0	-1.1	0	1	0	0
chr2:178483632-178483662	rs6712307	chr2	178483640	178483641	C	G	snv	commonSome,rareSome,	0.0347444	TTC30A	-	0.0040834	NM_152275	-4091	-2623	utr5	Others	GACCGGGAAGATTCAGTCTCTGAACGGCCCGGAGTAGTCG	GACCGGGAAGATTCAGTCTCTGAACCGCCCGGAGTAGTCG	-5.8	-5.8	0	1	0	0
chr12:32797079-32797109	rs73313005	chr12	32797096	32797097	T	C	snv	clinvar,clinvarBenign,commonSome,rareSome,	0.0389377	FGD4	+	0.0106778	NM_139241	30	-663	utr3	Others	TCTTAATGTTTTCATTCTTAAATTTTGTATTCTCCAAGAA	TCTTAATGTTTTCATTCTTAAACTTTGTATTCTCCAAGAA	-1.2	-2	0	1	0	0
chr17:908345-908375	rs118178620	chr17	908351	908352	C	T	snv	commonSome,commonAll,	0.0395367	ABR	-	0.00376901	NM_001092	128	-1548	utr3	2-quartet	CTGCTGAGGAAACACCACAGGCTGAACGGGGGAGGAATGC	CTGCTGAGGAAACACCACAGGCTGAACAGGGGAGGAATGC	-3.7	-3.7	1	2	0	0
chr15:91073221-91073251	rs139499011	chr15	91073234	91073235	G	C	snv	commonSome,commonAll,	0.0419329	CRTC3	+	8.76558e+09	NM_022769	-2277	-5086	utr5	bulge	CCCCGGCGGCCTGTGGACGGACGGGTGGGCCGAGGTACAG	CCCCGGCGGCCTGTGGACCGACGGGTGGGCCGAGGTACAG	-9.1	-9.1	0	1	0	0
chr14:71196401-71196431	rs2286053	chr14	71196426	71196427	C	T	snv	commonSome,commonAll,overlapDiffClass,	0.0495208	MAP3K9	-	0.00579568	NM_033141	150	-2	utr3	2-quartet	GTGAGAACGGGGGGACGGGGATGTTAGGAAAAATACAGTA	GTGAGAACAGGGGGACGGGGATGTTAGGAAAAATACAGTA	0.2	0.1	0	1	0	0
chr15:35270986-35271016	rs59261248	chr15	35270987	35270988	C	T	snv	commonSome,rareSome,	0.0640974	ZNF770	-	0.00098593	NM_014106	-80	-195	utr3	2-quartet	TTGGATTTTTGGTATCTGTGGGTTGGGGGGACGGTCCAGG	TTGGATTTTTGGTATCTGTGGGTTGGGGGGACAGTCCAGG	0.4	-0.6	0	1	0	0
chr17:908345-908375	rs118178620	chr17	908351	908352	C	T	snv	commonSome,commonAll,	0.0654286	ABR	-	0.00376901	NM_001092	128	-1548	utr3	2-quartet	CTGCTGAGGAAACACCACAGGCTGAACGGGGGAGGAATGC	CTGCTGAGGAAACACCACAGGCTGAACAGGGGAGGAATGC	-3.7	-3.7	1	2	0	0
chr2:24439043-24439073	rs3731625	chr2	24439047	24439048	A	G	snv	commonSome,commonAll,	0.0654952	ITSN2	-	0.00483475	NM_019595	-1391	-1965	cds	2-quartet	CGGGGGCGAGAAGATGCCGGTGCAGATGATTGGGGACATC	CGGGGGCGAGAAGATGCCGGTGCAGATGACTGGGGACATC	-1	-3.1	1	2	0	0
chr12:21643201-21643231	rs1065751	chr12	21643222	21643223	C	T	snv	clinvar,clinvarBenign,commonSome,rareSome,	0.0662245	RECQL	-	0.0102672	NM_032941	-1800	-2881	cds	2-quartet	GAAACTATTAACGTAACAATGGCTGGAAAGGAGGTATTTC	GAAACTATTAACATAACAATGGCTGGAAAGGAGGTATTTC	-0.3	-0.3	2	3	0	0
chr8:144891747-144891777	rs118022661	chr8	144891767	144891768	C	T	snv	commonSome,commonAll,	0.066684	SCRIB	-	2.04728e+09	NM_182706	-3460	-3514	cds	2-quartet	GAGCCAGCAGGAAGCCACGACTGCTGGCGGGGAGGAAGAC	GAGCCAGCAGGAAACCACGACTGCTGGCGGGGAGGAAGAC	-8.3	-8.3	0	1	0	0
chr22:42091612-42091642	rs75830242	chr22	42091640	42091641	G	A	snv	commonSome,rareSome,	0.0710863	C22orf46	+	0.00561817	NM_001142964	-1277	-2479	utr3	2-quartet	AAGAGAAACCTGAGAGAAGTTGGAGGTGAGGACGGTGTAA	AAGAGAAACCTGAGAGAAGTTGGAGGTGAGGACAGTGTAA	0.1	0.1	1	2	0	0
chr19:56632571-56632601	rs10418700	chr19	56632582	56632583	C	G	snv	commonSome,rareSome,	0.0788738	ZNF787	-	0.00153777	NM_001002836	-1223	-1826	utr5	2-quartet	TGCCACCATCCGCGAGGCAGGAGAGAGGAGGAGGAGTGCG	TGCCACCATCCGCGAGGCAGGACAGAGGAGGAGGAGTGCG	-2.1	-2	0	1	0	0
chr19:17430836-17430866	rs13238	chr19	17430845	17430846	C	T	snv	commonSome,commonAll,	0.0817645	DDA1	+	9.66706e+09	NM_024050	148	-215	utr3	PQs_7	TTACTGTGGCCGGGCGACAGGGGCGGGCCCGGGGTGGCCT	TTACTGTGGCCGGGTGACAGGGGCGGGCCCGGGGTGGCCT	-5.8	-3.5	0	1	1	1
chr16:30363370-30363400	rs17839551	chr16	30363381	30363382	C	T	snv	commonSome,rareSome,overlapDiffClass,	0.0864617	CD2BP2	-	0.000379272	NM_006110	865	785	utr3	2-quartet	TCCAGGAATTCAGAGTCTGGTGGCAGGGGCATGGGAAATA	TCCAGGAATTCAGAGTCTGGTGACAGGGGCATGGGAAATA	-0.6	-1.5	0	1	0	0
chr15:28447279-28447309	rs74005645	chr15	28447281	28447282	C	T	snv	clinvar,clinvarBenign,commonSome,commonAll,	0.145567	HERC2	-	0.0149801	NM_004667	-7139	-7220	cds	2-quartet	CGAGTATTCTGACGAGGAGGTGGTGGAGGACGTGGATGAT	CGAGTATTCTGACGAGGAGGTGGTGGAGGACATGGATGAT	0.5	0.5	0	1	0	0
chr6:26413069-26413099	rs6900725	chr6	26413087	26413088	T	C	snv	commonSome,commonAll,	0.146366	BTN3A1	+	0.00623549	NM_194441	-405	-2315	utr3	bulge	AAAGCATTAGTGGGCAGAGTGAATATGGGGAGGGAAACAA	AAAGCATTAGTGGGCAGAGTGAACATGGGGAGGGAAACAA	1.2	1.2	1	2	0	0
chr5:180651216-180651246	rs6601178	chr5	180651230	180651231	G	A	snv	commonSome,commonAll,overlapDiffClass,	0.151757	TRIM41	+	8.54214e+08	NM_033549	-1663	-2656	cds	bulge	GGAAGTGGAGGCTGTGGGGGCTGGCGCGGGGTGGGACACC	GGAAGTGGAGGCTGTGGGGACTGGCGCGGGGTGGGACACC	-3.8	-3.8	1	2	0	0
chr1:19639293-19639323	rs2231192	chr1	19639308	19639309	G	A	snv	commonSome,rareSome,	0.158879	PQLC2	+	0.0115939	NM_017765	-1254	-1633	utr5	2-quartet	TGGTAGCCCCGAGCTGGGACGCTCCTCCCTCCACAATCTC	TGGTAGCCCCGAGCTGGGACACTCCTCCCTCCACAATCTC	-2.7	-2.7	0	1	0	0
chr16:58079139-58079169	rs3743563	chr16	58079164	58079165	G	A	snv	commonSome,commonAll,	0.198882	MMP15	+	0.00556967	NM_002428	-424	-1615	cds	PQs_7	GGGGACTTTGGGGCCGGGGTCAACAAGGACGGGGGCAGCC	GGGGACTTTGGGGCCGGGGTCAACAAGGACAGGGGCAGCC	-1	-1.1	1	2	0	0
chr1:205744194-205744224	rs1572931	chr1	205744217	205744218	C	T	snv	commonSome,commonAll,	0.208866	RAB7L1	-	0.0032682	NM_001135663	-873	-2982	utr5	2-quartet	TCTCGTCAGAGCAGCCCAGACAGGCGGTGGGTGGGAATGC	TCTCGTCAGAACAGCCCAGACAGGCGGTGGGTGGGAATGC	-4	-4.4	1	2	0	0
chr22:38202381-38202411	rs6000898	chr22	38202398	38202399	T	C	snv	commonSome,commonAll,	0.276358	H1F0	+	3.56314e+06	NM_005318	126	-1007	utr3	PQs_7	AACCTACTTACGGGGTTAGGGATTTGCGGGGGGGGCTTGT	AACCTACTTACGGGGTTAGGGACTTGCGGGGGGGGCTTGT	-1	-1	0	1	1	1
chr7:72350337-72350367	rs62463388	chr7	72350360	72350361	A	G	snv	refIsMinor,commonSome,commonAll,	0.284545	POM121	+	0.00228491	NM_172020	-4012	-5542	utr5	bulge	GGAGCAGAACAGCCTTGGTGAGGTGGACGGGAGGGGACTT	GGAGCAGAACAGCCTTGGTGAGGTGGACAGGAGGGGACTT	-0.4	-0.4	2	3	0	0
chr17:49257764-49257794	rs3803886	chr17	49257789	49257790	T	C	snv	refIsMinor,commonSome,commonAll,overlapDiffClass,	0.47484	MBTD1	-	4.31253e+08	NM_017643	-237	-2960	utr3	long_loop	GTGGGGGAGCTATTTTAGTCGGGGGGGCAGGGGGGTGGGA	GTGGGGGAACTATTTTAGTCGGGGGGGCAGGGGGGTGGGA	2	0.5	0	1	1	1
