# Supplementary material for: The frequency and fitness of m6A-associated variants may be modulated by thermodynamic stability of the overlapping G-quadruplex
Source: Research Square preprint supplement (doi:10.21203/rs.3.rs-1737671/v1), 2022-06-15
Supplement: Supplementary file 4 [file ea8b8e46e203db4907af7f84.xlsx]

## Sheet: n -> n
Gene	Chromosome	Start	End	Variant name	Position	Reference allelle	Variant allelle	MAF value	G4 sequence with referance allele	G4 sequence with variant allele	m6A motif number in G4 sequence with referance allele	m6A motif number in G4 sequence with variant allele
PLCG2	chr16	81959696	81959723	rs1000001222	81959699	G	T	0	GGGGGAAGTTGGGTACCAAGGGCATGGG	GGGGTAAGTTGGGTACCAAGGGCATGGG	0	0
SMARCA4	chr19	11142811	11142834	rs1000034162	11142830	A	T	0	GGGCTGGGGGCGCGTTGGGGAGGG	GGGCTGGGGGCGCGTTGGGGTGGG	0	0
ZAP70	chr2	98356142	98356165	rs1000140002	98356164	G	T	0	GGGGAGCAGGGAGGTCCGGGAGGG	GGGGAGCAGGGAGGTCCGGGAGGT	0	0
DNAJB6	chr7	157195138	157195160	rs1000220193	157195141	C	T	0	GGGGCGGGCGTGGGGTGACAGGG	GGGGTGGGCGTGGGGTGACAGGG	1	1
DNAJB6	chr7	157202805	157202830	rs1000294032	157202827	G	A	0	GGGCGTGGGCGGTCGGGCGGGGCGGG	GGGCGTGGGCGGTCGGGCGGGGCAGG	0	0
GPR98	chr5	89892634	89892654	rs1000300890	89892642	A	C	0	GGGCGAGGGAGAGGGCGAGGG	GGGCGAGGGCGAGGGCGAGGG	0	0
CDH23	chr10	73361977	73361994	rs1000307468	73361990	G	T	0	GGGGCGGGAGGGCAGGGG	GGGGCGGGAGGGCATGGG	0	0
ANTXR1	chr2	69441067	69441092	rs1000356474	69441084	G	T	0	GGGCCAGTGTGGGGCATGGGAGGGGG	GGGCCAGTGTGGGGCATGTGAGGGGG	0	0
CAMTA1	chr1	7625348	7625373	rs1000370189	7625372	G	A	0	GGGGCCCACGGGCCTATGGGGATGGG	GGGGCCCACGGGCCTATGGGGATGGA	0	0
COL6A2	chr21	47538555	47538583	rs1000595507	47538569	A	T	0	GGGCCCCCGGGAGAAATCGGGGCCAAGGG	GGGCCCCCGGGAGAATTCGGGGCCAAGGG	0	0
RAD51B	chr14	69095017	69095046	rs1000597091	69095019	C	A	0	GGGCCGCCCCGGGGCGCGGGATGGGAAGGG	GGGACGCCCCGGGGCGCGGGATGGGAAGGG	0	0
ATP1A2	chr1	160087531	160087556	rs1000721199	160087537	G	T	0	GGGCAGCGTGGGAGTTGGGGGAAGGG	GGGCAGCTTGGGAGTTGGGGGAAGGG	0	0
RBPJ	chr4	26271913	26271939	rs1000725911	26271931	A	G	0	GGGAAGGGAAGGGGAGGGGAGGAGGGG	GGGAAGGGAAGGGGAGGGGGGGAGGGG	0	0
IL6R	chr1	154403602	154403625	rs1000762883	154403622	G	C	0	GGGCGGGGGAGAGGGAGCTTGGGG	GGGCGGGGGAGAGGGAGCTTGCGG	0	0
DYSF	chr2	71740263	71740290	rs1000814480	71740270	C	T	0	GGGGTGGGCGGGGAAGGCAGGGTTGGGG	GGGGTGGGTGGGGAAGGCAGGGTTGGGG	0	0
COL6A1	chr21	47421006	47421036	rs1000844177	47421029	T	C	0	GGGGCCATGGGAGGGGGTGGGCTTTTCTGGG	GGGGCCATGGGAGGGGGTGGGCTTCTCTGGG	0	0
PKP1	chr1	201299370	201299398	rs1000960081	201299383	T	G	0	GGGGGTTAGGGAGGTTGGGGCGGTGGGGG	GGGGGTTAGGGAGGGTGGGGCGGTGGGGG	0	0
MEF2A	chr15	100078229	100078261	rs1001036316	100078231	A	G	0	GGGATGGGATGGGATGGGATGGGATGGGATGGG	GGGGTGGGATGGGATGGGATGGGATGGGATGGG	0	0
MXI1	chr10	111987055	111987078	rs1001059120	111987062	C	G	0	GGGAGGGGCGGGTGCGGGGAGGGG	GGGAGGGGGGGGTGCGGGGAGGGG	0	0
SDCCAG8	chr1	243644193	243644218	rs1001108325	243644204	T	G	0	GGGTGGGTGGGATGGGATGGGATGGG	GGGTGGGTGGGAGGGGATGGGATGGG	0	0
LMNA	chr1	156052611	156052635	rs1001150519	156052628	G	A	0	GGGGGGGCCGGGGCCGGGGGCGGGG	GGGGGGGCCGGGGCCGGGAGCGGGG	0	0
MSH6	chr2	48010960	48010986	rs1001197893	48010975	T	G	0	GGGTGGGGAGGGGGCCTGGGAGGTGGG	GGGTGGGGAGGGGGCCGGGGAGGTGGG	0	0
SMARCB1	chr22	24168991	24169014	rs1001252806	24169012	G	A	0	GGGGCTCAAGGGCCCGGGCCTGGG	GGGGCTCAAGGGCCCGGGCCTGAG	0	0
ACTN4	chr19	39173781	39173807	rs1001307453	39173803	G	A	0	GGGGGACTGGGGAGTGCCTGGGAGGGG	GGGGGACTGGGGAGTGCCTGGGAAGGG	1	1
SYNGAP1	chr6	33388211	33388239	rs1001312850	33388219	G	T	0	GGGAGAGGGGAGGACCGGGAAGGCAGGGG	GGGAGAGGGTAGGACCGGGAAGGCAGGGG	1	1
COL18A1	chr21	46839424	46839445	rs1001322735	46839439	G	T	0	GGGCCCTGGGGTGGGAGCTGGG	GGGCCCTGGGGTGGGATCTGGG	0	0
GNA11	chr19	3105082	3105101	rs1001332722	3105084	A	G	0	GGGAGGGAGGGTGGGAGGGG	GGGGGGGAGGGTGGGAGGGG	0	0
MYLK2	chr20	30410405	30410429	rs1001400082	30410422	G	A	0	GGGCTGGGGGTGGGGTGAGATGGGG	GGGCTGGGGGTGGGGTGAAATGGGG	0	0
ACTN4	chr19	39180047	39180070	rs1001413181	39180052	G	A	0	GGGGCTGGGGGCTGGGTAGGAGGG	GGGGCTAGGGGCTGGGTAGGAGGG	0	0
EIF2B5	chr3	184053928	184053949	rs1001446165	184053936	T	G	0	GGGTACGGGTTGGGGAGTCGGG	GGGTACGGGGTGGGGAGTCGGG	0	0
ING1	chr13	111368426	111368457	rs1001655851	111368427	G	T	0	GGGCCGGACGGGCCCCGTGGGGTGACCCTGGG	GGTCCGGACGGGCCCCGTGGGGTGACCCTGGG	1	1
SYNGAP1	chr6	33388630	33388660	rs1001680634	33388658	G	T	0	GGGAGGCAGTGGGGGGTGGGGGGATGGAGGG	GGGAGGCAGTGGGGGGTGGGGGGATGGAGTG	0	0
FIP1L1	chr4	54768114	54768132	rs1001688848	54768124	A	G	0	GGGAGGGAGGGAGGGAGGG	GGGAGGGAGGGGGGGAGGG	0	0
SH3BP2	chr4	2835906	2835928	rs1001744735	2835927	G	C	0	GGGCCAGGGCAGCTGGGTGGGGG	GGGCCAGGGCAGCTGGGTGGGGC	0	0
DTNA	chr18	32074622	32074646	rs1001759881	32074631	G	A	0	GGGGCGCAGGGGGAGGGGGCAGGGG	GGGGCGCAGGAGGAGGGGGCAGGGG	0	0
ZAP70	chr2	98351639	98351668	rs1001811962	98351642	G	A	0	GGGTGGGTGGGGGTGTGGGGCCGAGCAGGG	GGGTAGGTGGGGGTGTGGGGCCGAGCAGGG	0	0
SMOC2	chr6	169004005	169004032	rs1001880230	169004025	G	T	0	GGGTGTCATAGGGGTGGGGCAGATGGGG	GGGTGTCATAGGGGTGGGGCATATGGGG	0	0
SLC6A19	chr5	1203576	1203605	rs1001980413	1203602	G	A	0	GGGCCGAGCAGGGCTCTGGGATGTGCTGGG	GGGCCGAGCAGGGCTCTGGGATGTGCTAGG	0	0
TUBB1	chr20	57594396	57594419	rs1002043250	57594413	C	G	0	GGGCGGGGAGCTGGGCCTCTGGGG	GGGCGGGGAGCTGGGCCTGTGGGG	0	0
KCNK3	chr2	26944105	26944131	rs1002044160	26944107	T	C	0	GGGTGGGGGCCTGAGAGGGGCAGAGGG	GGGCGGGGGCCTGAGAGGGGCAGAGGG	0	0
IDUA	chr4	991273	991296	rs1002055923	991280	G	A	0	GGGCCCAGGGGCGGGGACGTGGGG	GGGCCCAGAGGCGGGGACGTGGGG	0	0
TPO	chr2	1496978	1496992	rs1002055992	1496979	G	T	0	GGGTGGGGGGGGGGG	GGTTGGGGGGGGGGG	0	0
MITF	chr3	69839470	69839495	rs1002105017	69839484	G	T	0	GGGGGAGGGGGTAGTGGGAAAAGGGG	GGGGGAGGGGGTAGTTGGAAAAGGGG	0	0
BSG	chr19	580584	580606	rs1002112375	580588	G	T	0	GGGAGGCCGGGGATGGGGGCGGG	GGGAGTCCGGGGATGGGGGCGGG	0	0
PDGFRA	chr4	55096091	55096119	rs1002206448	55096107	T	G	0	GGGGGACCAGGGGGAGGTGGGGAGAGGGG	GGGGGACCAGGGGGAGGGGGGGAGAGGGG	1	1
SDCCAG8	chr1	243651262	243651284	rs1002442270	243651266	A	T	0	GGGCGATGGGGCAGGGCCGGGGG	GGGCGTTGGGGCAGGGCCGGGGG	0	0
MITF	chr3	69961420	69961446	rs1002465439	69961422	G	C	0	GGGGAGGGAGAGCAGGGAACTTATGGG	GGGCAGGGAGAGCAGGGAACTTATGGG	1	1
TENM3	chr4	183464393	183464412	rs1002486164	183464409	G	A	0	GGGAAGGGAGGGAGGAAGGG	GGGAAGGGAGGGAGGAAAGG	0	0
CNTNAP2	chr7	147097368	147097393	rs1002497722	147097391	G	A	0	GGGAGAGTCAGGGAGGGTATTAGGGG	GGGAGAGTCAGGGAGGGTATTAGGAG	0	0
CALM1	chr14	90864452	90864477	rs1002501062	90864468	C	G	0	GGGGCGGGGGGGGGGGGCGGCGGGGG	GGGGCGGGGGGGGGGGGGGGCGGGGG	0	0
SMOC2	chr6	168974665	168974688	rs1002514239	168974673	A	G	0	GGGGGAGGGATGGGTGGACCCGGG	GGGGGAGGGGTGGGTGGACCCGGG	1	1
HMGA2	chr12	66315871	66315896	rs1002591399	66315892	G	T	0	GGGCCATGGGGAAGGGAAATGTGGGG	GGGCCATGGGGAAGGGAAATGTTGGG	0	0
INF2	chr14	105174501	105174527	rs1002617749	105174510	G	A	0	GGGGACGGGGGAGGAGCAGGGCAGGGG	GGGGACGGGGAAGGAGCAGGGCAGGGG	0	0
RAB33B	chr4	140377489	140377516	rs1002663931	140377491	T	A	0	GGGTGGGGGAGGAGTTGGGATTTGAGGG	GGGAGGGGGAGGAGTTGGGATTTGAGGG	0	0
ERC1	chr12	1450828	1450849	rs1002749044	1450833	G	T	0	GGGGTGGGGGGTTGGGGGAGGG	GGGGTGTGGGGTTGGGGGAGGG	0	0
FUS	chr16	31202223	31202252	rs1002749744	31202234	G	A	0	GGGGAGGCTCGGGGAACATAGGGGAATGGG	GGGGAGGCTCGGAGAACATAGGGGAATGGG	1	1
CACNA1C	chr12	2162087	2162110	rs1002784849	2162094	C	G	0	GGGGCGGGCGCGGGCGCGGCGGGG	GGGGCGGGGGCGGGCGCGGCGGGG	0	0
MEF2A	chr15	100192388	100192408	rs1002802232	100192407	G	A	0	GGGATGGGGGTTGGGGGTGGG	GGGATGGGGGTTGGGGGTGGA	0	0
CBL	chr11	119077354	119077381	rs1002895558	119077380	G	A	0	GGGTGGGCGTGGGCGGAGGGCCGCGGGG	GGGTGGGCGTGGGCGGAGGGCCGCGGGA	0	0
ABCG8	chr2	44103854	44103883	rs1002934230	44103857	A	G	0	GGGAATATGGGGAGACTGTGGGAATATGGG	GGGAGTATGGGGAGACTGTGGGAATATGGG	1	1
IFT122	chr3	129220572	129220595	rs1002934666	129220588	G	A	0	GGGACGTTGGGTGTGATGGGTGGG	GGGACGTTGGGTGTGATAGGTGGG	0	0
MYO7A	chr11	76873833	76873852	rs1003034357	76873841	G	A	0	GGGCAGGGAGGGGAGTGGGG	GGGCAGGGAAGGGAGTGGGG	0	0
CDKAL1	chr6	20835343	20835369	rs1003197552	20835352	G	A	0	GGGCACTTGGGTAGAGGGTTTAGAGGG	GGGCACTTGGATAGAGGGTTTAGAGGG	0	0
PCCA	chr13	101061669	101061700	rs1003234805	101061692	A	G	0	GGGTTTTATAGGGTGAAAAGGGAAAAAAAGGG	GGGTTTTATAGGGTGAAAAGGGAAGAAAAGGG	0	0
WFS1	chr4	6286945	6286973	rs1003250919	6286956	G	A	0	GGGGCATTCAGGGAGAGGGACATTCAGGG	GGGGCATTCAGGAAGAGGGACATTCAGGG	1	1
EIF2B5	chr3	184319851	184319880	rs1003263721	184319876	C	A	0	GGGGCGGGAGGGGAGGCTGGGGGCGGCGGG	GGGGCGGGAGGGGAGGCTGGGGGCGGAGGG	0	0
RGS9	chr17	63175697	63175716	rs1003284969	63175700	G	A	0	GGGGGGGTGGGAACAAAGGG	GGGGAGGTGGGAACAAAGGG	1	1
TRIOBP	chr22	38158610	38158638	rs1003293133	38158625	G	T	0	GGGTGGGATGGGCACGGGGAGCAGGTGGG	GGGTGGGATGGGCACGTGGAGCAGGTGGG	0	0
IFNGR2	chr21	34775400	34775423	rs1003305308	34775412	A	G	0	GGGGGGGGTCAGGAGGGGTGGGGG	GGGGGGGGTCAGGGGGGGTGGGGG	0	0
CDH3	chr16	68744909	68744927	rs1003402022	68744917	A	G	0	GGGGAGGGGAGGGGAGGGG	GGGGAGGGGGGGGGAGGGG	0	0
DOK7	chr4	3488197	3488217	rs1003425430	3488205	T	G	0	GGGGAAGGGTGACTGGGAGGG	GGGGAAGGGGGACTGGGAGGG	1	1
GPI	chr19	34856019	34856046	rs1003428125	34856036	T	G	0	GGGGCCGGGGCTCAGGGGTGGGGCCGGG	GGGGCCGGGGCTCAGGGGGGGGGCCGGG	0	0
EIF2B5	chr3	184353736	184353757	rs1003447054	184353755	G	A	0	GGGCCTGGGGTTGGGTGGCGGG	GGGCCTGGGGTTGGGTGGCGAG	0	0
SLC39A13	chr11	47432181	47432201	rs1003461916	47432195	G	A	0	GGGGATGTGGGCACGGGTGGG	GGGGATGTGGGCACGAGTGGG	0	0
TET2	chr4	106068994	106069018	rs1003493334	106068999	G	C	0	GGGGAGGGGGCGGGAGGGGGTGGGG	GGGGAGCGGGCGGGAGGGGGTGGGG	0	0
FOXN1	chr17	26859096	26859124	rs1003515083	26859108	T	C	0	GGGTCTTCTAGGGTTTCAAGGGGCCAGGG	GGGTCTTCTAGGGCTTCAAGGGGCCAGGG	0	0
CNTNAP2	chr7	145821191	145821212	rs1003541936	145821194	T	C	0	GGGGTGGAGGGCTAGGGGAGGG	GGGGCGGAGGGCTAGGGGAGGG	0	0
GDAP1	chr8	75282152	75282174	rs1003548267	75282153	G	A	0	GGGGTGGGAAGGGGTGGTGAGGG	GGAGTGGGAAGGGGTGGTGAGGG	0	0
NFIX	chr19	13201609	13201637	rs1003552243	13201620	T	G	0	GGGTGGGCTGGGTGACGGGTGGAGGAGGG	GGGTGGGCTGGGGGACGGGTGGAGGAGGG	0	0
CYP4F22	chr19	15659276	15659303	rs1003559072	15659296	A	G	0	GGGATGGGCCTGTGAGGGTGCAGTTGGG	GGGATGGGCCTGTGAGGGTGCGGTTGGG	0	0
GTPBP3	chr19	17450402	17450432	rs1003584327	17450407	G	C	0	GGGAGAGGTGGGCGGACAGGGTGGTGATGGG	GGGAGACGTGGGCGGACAGGGTGGTGATGGG	1	1
WNT10A	chr2	219760487	219760512	rs1003613858	219760489	G	T	0	GGGGTGGGTGGTTGGGTGGGGCAGGG	GGGTTGGGTGGTTGGGTGGGGCAGGG	0	0
CTDP1	chr18	77458473	77458501	rs1003706225	77458481	G	A	0	GGGAAACACGGGGAAATGCAGGGTGAGGG	GGGAAACACAGGGAAATGCAGGGTGAGGG	1	1
RIMS1	chr6	72704562	72704579	rs1003710850	72704578	G	A	0	GGGGAAGGGAAGGGCGGG	GGGGAAGGGAAGGGCGGA	0	0
TG	chr8	134017518	134017545	rs1003792732	134017543	G	A	0	GGGACAGGGGGACAGGGGGACAGTGGGG	GGGACAGGGGGACAGGGGGACAGTGGAG	3	3
PLCB4	chr20	9049615	9049641	rs1003802441	9049617	A	G	0	GGGAGGGCGGGACTGGGGTGCGCCGGG	GGGGGGGCGGGACTGGGGTGCGCCGGG	1	1
TECR	chr19	14647978	14648006	rs1003823165	14648002	A	G	0	GGGGCCGGGGGGGAAGGGGAGGCCGAGGG	GGGGCCGGGGGGGAAGGGGAGGCCGGGGG	0	0
POR	chr7	75578387	75578411	rs1003941585	75578406	G	A	0	GGGTGGTGGGAGTGGGTTCTGAGGG	GGGTGGTGGGAGTGGGTTCTAAGGG	0	0
CNTNAP2	chr7	146722430	146722460	rs1003964765	146722435	A	G	0	GGGGGGAGGGGAGGGGAGGGGAAGGGAGGGG	GGGGGGGGGGGAGGGGAGGGGAAGGGAGGGG	0	0
SLC12A3	chr16	56932109	56932130	rs1004044367	56932129	G	T	0	GGGCAAGGGGTTGGGGGGAGGG	GGGCAAGGGGTTGGGGGGAGGT	0	0
PEX26	chr22	18577929	18577956	rs1004047865	18577937	G	C	0	GGGCTGAAGGGTGGAGGTGGGGCAGGGG	GGGCTGAAGCGTGGAGGTGGGGCAGGGG	0	0
ARHGAP26	chr5	142406360	142406386	rs1004052706	142406372	G	C	0	GGGGTGGGTGGGGGTGGGGGGTGGGGG	GGGGTGGGTGGGGCTGGGGGGTGGGGG	0	0
ZBTB38	chr3	141045243	141045269	rs1004076870	141045264	G	C	0	GGGGGTTGCAGGGGAGCAGGGTGGGGG	GGGGGTTGCAGGGGAGCAGGGTCGGGG	0	0
PNPLA2	chr11	822055	822076	rs1004095811	822059	G	T	0	GGGGTGGGCCGTGGGATGAGGG	GGGGTTGGCCGTGGGATGAGGG	0	0
GATA3	chr10	8096475	8096496	rs1004112411	8096485	A	G	0	GGGGCGGGAGGAGGGGCGGGGG	GGGGCGGGAGGGGGGGCGGGGG	0	0
GRIK2	chr6	102335597	102335619	rs1004125708	102335608	A	C	0	GGGAGAGGGGGAAGGGGGAAGGG	GGGAGAGGGGGACGGGGGAAGGG	0	0
TET2	chr4	106110035	106110062	rs1004126884	106110043	G	A	0	GGGTACTGGGTTTTTTGGGGCGAGGGGG	GGGTACTGGATTTTTTGGGGCGAGGGGG	0	0
TRIOBP	chr22	38158009	38158025	rs1004154361	38158010	G	A	0	GGGTGGGTGGGGCTGGG	GGATGGGTGGGGCTGGG	0	0
SEPT9	chr17	75369355	75369377	rs1004176621	75369369	G	C	0	GGGAGGCGGGGGCGGGGCGGGGG	GGGAGGCGGGGGCGGCGCGGGGG	0	0
GPR98	chr5	89892634	89892654	rs1004187110	89892637	G	A	0	GGGCGAGGGAGAGGGCGAGGG	GGGCAAGGGAGAGGGCGAGGG	0	0
CNTNAP2	chr7	147499862	147499889	rs1004207989	147499880	G	A	0	GGGGAGAGGGAGAGGGAGGGGGAGGGGG	GGGGAGAGGGAGAGGGAGGAGGAGGGGG	0	0
RNASEH2B	chr13	51518157	51518188	rs1004230303	51518175	G	A	0	GGGACGGACGGGACGTGATGGGACGGGACGGG	GGGACGGACGGGACGTGATAGGACGGGACGGG	0	0
FGGY	chr1	59765367	59765381	rs1004301446	59765369	T	G	0	GGGTGGGGGGGCGGG	GGGGGGGGGGGCGGG	0	0
MSH3	chr5	80089807	80089832	rs1004310978	80089830	G	A	0	GGGAATACGAGGGAACAGGGAAAGGG	GGGAATACGAGGGAACAGGGAAAGAG	1	1
PLOD1	chr1	12031170	12031193	rs1004407563	12031181	C	G	0	GGGGCGGGGGGGCAGGGGTGAGGG	GGGGCGGGGGGGGAGGGGTGAGGG	0	0
GLI2	chr2	121652629	121652647	rs1004430247	121652633	G	A	0	GGGGAGGGGAGGGGAGGGG	GGGGAAGGGAGGGGAGGGG	0	0
MMP2	chr16	55512987	55513016	rs1004465437	55513011	A	G	0	GGGCGAGTAGGGGGGTGGGGCAGAGAGGGG	GGGCGAGTAGGGGGGTGGGGCAGAGGGGGG	0	0
SCNN1B	chr16	23359776	23359797	rs1004469371	23359786	A	G	0	GGGAGGGAGGGAGGGGGGAGGG	GGGAGGGAGGGGGGGGGGAGGG	0	0
ITPKC	chr19	41235323	41235348	rs1004523071	41235329	G	T	0	GGGGCTGGGGCAGCCCTGGGGCAGGG	GGGGCTGTGGCAGCCCTGGGGCAGGG	0	0
DCC	chr18	49868825	49868845	rs1004541204	49868841	T	G	0	GGGTGGGGGTGGGGGGGTGGG	GGGTGGGGGTGGGGGGGGGGG	0	0
PEX5	chr12	7367163	7367184	rs1004666091	7367181	G	A	0	GGGGTGGGGGGAGGGGGGAGGG	GGGGTGGGGGGAGGGGGGAAGG	0	0
HTT	chr4	3117364	3117385	rs1004733999	3117383	G	A	0	GGGACTGGGCAGTGGGTGTGGG	GGGACTGGGCAGTGGGTGTGAG	1	1
FGD4	chr12	32786138	32786161	rs1004774864	32786157	G	C	0	GGGGACCGGGTTGGGAGGAGGGGG	GGGGACCGGGTTGGGAGGAGCGGG	1	1
TBC1D24	chr16	2550508	2550532	rs1004793997	2550525	T	G	0	GGGGCTCTGGGATGAGGGTGTGGGG	GGGGCTCTGGGATGAGGGGGTGGGG	0	0
TEAD1	chr11	12845399	12845425	rs1004837685	12845404	C	T	0	GGGATACAGTGGGTATGAGAGGGAGGG	GGGATATAGTGGGTATGAGAGGGAGGG	0	0
CCM2	chr7	45040001	45040029	rs1004990941	45040025	T	G	0	GGGCGGCTGGGTTGAGGGGCCAGGGTGGG	GGGCGGCTGGGTTGAGGGGCCAGGGGGGG	0	0
ROBO3	chr11	124735651	124735675	rs1004998733	124735663	C	T	0	GGGGATATGGGATCCTGGGATGGGG	GGGGATATGGGATTCTGGGATGGGG	0	0
COL9A3	chr20	61459558	61459577	rs1005010285	61459569	T	G	0	GGGAAGTAAGGGTGGGTGGG	GGGAAGTAAGGGGGGGTGGG	0	0
BEAN1	chr16	66493831	66493851	rs1005100266	66493841	G	T	0	GGGCTGTGGGGGTTGGGTGGG	GGGCTGTGGGGTTTGGGTGGG	0	0
MUC5B	chr11	1245757	1245779	rs1005114109	1245765	G	A	0	GGGGCGGGGGAGGGGCTGTAGGG	GGGGCGGGGAAGGGGCTGTAGGG	0	0
FBLN1	chr22	45927593	45927619	rs1005136294	45927606	G	A	0	GGGCTGGCTGGGGAGGGGAAGGGTGGG	GGGCTGGCTGGGGAAGGGAAGGGTGGG	0	0
NPSR1	chr7	34860324	34860350	rs1005157640	34860326	T	G	0	GGGTTGGGTAGTGGGGGATGGGGTGGG	GGGGTGGGTAGTGGGGGATGGGGTGGG	0	0
BLK	chr8	11417762	11417776	rs1005176363	11417763	G	A	0	GGGTGGGTGGGTGGG	GGATGGGTGGGTGGG	0	0
RAI1	chr17	17696109	17696131	rs1005254798	17696123	T	G	0	GGGTGGGGAGGTGGGTGGGAGGG	GGGTGGGGAGGTGGGGGGGAGGG	0	0
CNTNAP2	chr7	147833139	147833162	rs1005315248	147833152	A	G	0	GGGGAAGGGAAGGGAGGGGAAGGG	GGGGAAGGGAAGGGGGGGGAAGGG	0	0
BAG3	chr10	121429200	121429227	rs1005316938	121429207	G	A	0	GGGGTGGGGGGTTTGGAGGGTACAGGGG	GGGGTGGGAGGTTTGGAGGGTACAGGGG	0	0
RAD51B	chr14	69160653	69160682	rs1005408645	69160673	A	G	0	GGGAGGCAAGGGACACAGGGGAACTTTGGG	GGGAGGCAAGGGACACAGGGGGACTTTGGG	2	2
GABRA1	chr5	161275512	161275540	rs10054330	161275538	G	A	0	GGGGGGGGGGGGCGGGGGGAGACGGGGGG	GGGGGGGGGGGGCGGGGGGAGACGGGGAG	0	0
DAGLA	chr11	61453687	61453708	rs1005440808	61453698	G	A	0	GGGGAAGGGGTGGGAAGTGGGG	GGGGAAGGGGTGAGAAGTGGGG	0	0
ROBO2	chr3	76850409	76850431	rs1005516775	76850412	A	G	0	GGGAAGGGTCGTGTGGGAGTGGG	GGGAGGGGTCGTGTGGGAGTGGG	0	0
COL18A1	chr21	46877724	46877749	rs1005550173	46877748	G	A	0	GGGCTTTGGGACAGGGTTGGTGGGGG	GGGCTTTGGGACAGGGTTGGTGGGGA	1	1
PLCB4	chr20	9373539	9373561	rs1005632751	9373549	T	G	0	GGGTGGAGGGGTGGGTGGGTGGG	GGGTGGAGGGGGGGGTGGGTGGG	0	0
MSRB3	chr12	65726267	65726288	rs1005653930	65726286	G	A	0	GGGGTGGGGTGAGTGGGGAGGG	GGGGTGGGGTGAGTGGGGAGAG	0	0
OPA1	chr3	193311092	193311117	rs1005672858	193311107	C	T	0	GGGAGCCGGGCTGGGGCTCACACGGG	GGGAGCCGGGCTGGGGTTCACACGGG	0	0
ESRRB	chr14	76796295	76796326	rs1005680125	76796321	A	G	0	GGGGAGGTGTGGGTGGGGGAGGGAGGGAGGGG	GGGGAGGTGTGGGTGGGGGAGGGAGGGGGGGG	0	0
KCNQ1	chr11	2530978	2531003	rs1005735174	2530988	G	A	0	GGGGCTTCCGGGGGTGGGGAGCGGGG	GGGGCTTCCGGAGGTGGGGAGCGGGG	0	0
RAD51B	chr14	68950195	68950218	rs1005762610	68950215	G	A	0	GGGAAGGGATAGTGGGTTCAAGGG	GGGAAGGGATAGTGGGTTCAAAGG	0	0
CIRH1A	chr16	69166893	69166916	rs1005826894	69166898	C	G	0	GGGCGTCGGGGGGACGGGGTAGGG	GGGCGTGGGGGGGACGGGGTAGGG	0	0
EIF2B5	chr3	183947006	183947030	rs1005847878	183947009	A	G	0	GGGCAGGGGGTGGGGTGGGCTGGGG	GGGCGGGGGGTGGGGTGGGCTGGGG	0	0
SMAD6	chr15	67073887	67073902	rs1005865198	67073889	A	G	0	GGGAGGGGCGGGTGGG	GGGGGGGGCGGGTGGG	0	0
GPC6	chr13	94464396	94464417	rs1005913447	94464402	G	C	0	GGGGGGGGGGGCGGGGGGTGGG	GGGGGGGCGGGCGGGGGGTGGG	0	0
BMP1	chr8	22023094	22023125	rs1006012337	22023113	G	A	0	GGGCCAGGCGGGGAGGCGCGGGCGGGTTCGGG	GGGCCAGGCGGGGAGGCGCGAGCGGGTTCGGG	0	0
RAI1	chr17	17631612	17631631	rs1006026214	17631619	T	G	0	GGGAGGGGTGGGGTTGAGGG	GGGAGGGGGGGGGTTGAGGG	0	0
BSG	chr19	577395	577419	rs1006074616	577410	G	T	0	GGGTCTCTGGGGTCAGGGTATCGGG	GGGTCTCTGGGGTCAGTGTATCGGG	0	0
NDUFA13	chr19	19643319	19643348	rs1006191123	19643320	G	T	0	GGGGGTACGGGGTGGGAGGGTGGCATTGGG	GGTGGTACGGGGTGGGAGGGTGGCATTGGG	0	0
FGD4	chr12	32716948	32716975	rs1006307076	32716969	A	G	0	GGGGAGAGGGAGAGGGAGGGGGAGGGGG	GGGGAGAGGGAGAGGGAGGGGGGGGGGG	0	0
COL4A2	chr13	111060568	111060599	rs1006377447	111060588	G	A	0	GGGGCCACAAGGGTCCCCAGGGCGGGGAGGGG	GGGGCCACAAGGGTCCCCAGGACGGGGAGGGG	0	0
RTEL1	chr20	62320977	62320997	rs1006385021	62320983	G	T	0	GGGCCAGGGTGGGGCTGGGGG	GGGCCAGTGTGGGGCTGGGGG	0	0
DNASE1	chr16	3696483	3696513	rs1006454690	3696495	T	G	0	GGGCCATGGCGGGTGTAGGGGTTGGGTGGGG	GGGCCATGGCGGGGGTAGGGGTTGGGTGGGG	0	0
PNKD	chr2	219137696	219137720	rs1006464538	219137710	G	A	0	GGGATGGGAGGGGCAGAGGGTGGGG	GGGATGGGAGGGGCAAAGGGTGGGG	0	0
ARID1A	chr1	27022817	27022844	rs1006487095	27022832	T	G	0	GGGCCCCGGGGCGGGGTGGGAGGGGGGG	GGGCCCCGGGGCGGGGGGGGAGGGGGGG	0	0
ARHGEF10	chr8	1799183	1799212	rs1006510594	1799206	G	T	0	GGGTTGCTAGGGGTTTGCGGGGGGGAGGGG	GGGTTGCTAGGGGTTTGCGGGGGGTAGGGG	0	0
COL18A1	chr21	46856577	46856601	rs1006533891	46856587	T	G	0	GGGGGAGGGGGTCTGGTGGGGAGGG	GGGGGAGGGGGGCTGGTGGGGAGGG	0	0
RYR1	chr19	38925306	38925331	rs1006608941	38925320	G	A	0	GGGGCCTGGGCAGGGGATGGGGAGGG	GGGGCCTGGGCAGGGAATGGGGAGGG	0	0
RDH12	chr14	68184908	68184933	rs1006641319	68184915	T	C	0	GGGCTCCTTAGGGAAGTTGGGCAGGG	GGGCTCCTCAGGGAAGTTGGGCAGGG	0	0
CAMTA1	chr1	7576459	7576489	rs1006646690	7576484	C	T	0	GGGCCGTGGAGGGCAGCTGGGGCAGCCAGGG	GGGCCGTGGAGGGCAGCTGGGGCAGCTAGGG	0	0
ATP8A2	chr13	26055292	26055317	rs1006680501	26055305	G	A	0	GGGAGAGGGAGACCGTGGGGAGAGGG	GGGAGAGGGAGACCATGGGGAGAGGG	1	1
PEX14	chr1	10568922	10568941	rs1006699581	10568928	G	A	0	GGGTACTGGGGAAGGGTGGG	GGGTACTAGGGAAGGGTGGG	0	0
CEP164	chr11	117198724	117198749	rs1006736601	117198729	G	A	0	GGGAGGGGTTGGGCGGCGGGGAAGGG	GGGAGGAGTTGGGCGGCGGGGAAGGG	0	0
SFTPC	chr8	22017777	22017800	rs1006787718	22017799	G	A	0	GGGCAGGGCCCAGGTGGGAGGGGG	GGGCAGGGCCCAGGTGGGAGGGGA	0	0
GAA	chr17	78085695	78085725	rs1006801389	78085723	G	A	0	GGGGCTCCTGGGAGGTGGGGGGCAGGGAGGG	GGGGCTCCTGGGAGGTGGGGGGCAGGGAGAG	0	0
TBX4	chr17	59541637	59541666	rs1006868806	59541647	G	A	0	GGGCACAGGCGGGGCTGGGTGGGGCGTGGG	GGGCACAGGCGAGGCTGGGTGGGGCGTGGG	0	0
TTC7A	chr2	47221343	47221368	rs1006872992	47221350	T	C	0	GGGGCTCCTTGGGAGTGGGGTTGGGG	GGGGCTCCCTGGGAGTGGGGTTGGGG	0	0
DYSF	chr2	71778064	71778086	rs1006884140	71778083	G	A	0	GGGGGGGAACTGAGGGCCAGGGG	GGGGGGGAACTGAGGGCCAGAGG	1	1
TRMU	chr22	46747266	46747288	rs1006951169	46747268	A	G	0	GGGAGGGCCTTGGGGATGGAGGG	GGGGGGGCCTTGGGGATGGAGGG	0	0
DPP10	chr2	116246307	116246328	rs1006980928	116246308	G	A	0	GGGGTCGGGGGAGGGGGGAGGG	GGAGTCGGGGGAGGGGGGAGGG	0	0
SMOC2	chr6	169061455	169061479	rs1006984820	169061474	A	T	0	GGGGCAGGGAAGGGGCATGGATGGG	GGGGCAGGGAAGGGGCATGGTTGGG	0	0
HGSNAT	chr8	42995629	42995658	rs1007037858	42995646	G	C	0	GGGCGGCGGGCATGAGCGGGGCGGGCAGGG	GGGCGGCGGGCATGAGCGCGGCGGGCAGGG	0	0
PCCA	chr13	100927299	100927324	rs1007056618	100927303	A	G	0	GGGGGAGGGGGTGGGGGGGGAGGGGG	GGGGGGGGGGGTGGGGGGGGAGGGGG	0	0
CDH23	chr10	73338045	73338070	rs1007082066	73338056	G	T	0	GGGCACTTTGGGGCTCTGGGCCTGGG	GGGCACTTTGGGTCTCTGGGCCTGGG	0	0
MUC5B	chr11	1245783	1245810	rs1007116471	1245785	A	G	0	GGGAGGGGCTGCCTGGGGCTGGGGAGGG	GGGGGGGGCTGCCTGGGGCTGGGGAGGG	0	0
PAX7	chr1	18993112	18993136	rs1007277786	18993130	A	T	0	GGGGTGGGGGAAAGGGTTGATGGGG	GGGGTGGGGGAAAGGGTTGTTGGGG	0	0
WNK1	chr12	916280	916307	rs1007302313	916289	G	A	0	GGGGTGGGGGGTTGGTGTGGGGAGTGGG	GGGGTGGGGGATTGGTGTGGGGAGTGGG	0	0
PRKCH	chr14	61807087	61807117	rs1007311653	61807100	T	G	0	GGGAGGGGGCGGGGTGGGGGGCGGGGGTGGG	GGGAGGGGGCGGGGGGGGGGGCGGGGGTGGG	0	0
CDH23	chr10	73378109	73378131	rs1007375719	73378129	G	T	0	GGGGCGGGCGTAGGGGGGCAGGG	GGGGCGGGCGTAGGGGGGCAGTG	0	0
CD81	chr11	2399087	2399113	rs1007377780	2399111	G	A	0	GGGCCGGGGCTTCTGGGGGCCGCCGGG	GGGCCGGGGCTTCTGGGGGCCGCCGAG	0	0
LDLRAP1	chr1	25870299	25870317	rs1007415780	25870305	G	T	0	GGGCCGGGCCGGGATCGGG	GGGCCGGTCCGGGATCGGG	0	0
BANK1	chr4	102568773	102568797	rs1007467287	102568775	C	A	0	GGGCTGACTGGGGGTGGGAATAGGG	GGGATGACTGGGGGTGGGAATAGGG	1	1
CAMTA1	chr1	7673817	7673848	rs1007495841	7673840	T	G	0	GGGAGCAGGCGGGACCTGGAGGGGTGGGTGGG	GGGAGCAGGCGGGACCTGGAGGGGGGGGTGGG	1	1
STK11	chr19	1205658	1205678	rs1007542609	1205676	G	C	0	GGGGCGGGCAGAGGGCCGGGG	GGGGCGGGCAGAGGGCCGGCG	0	0
DISC1	chr1	232098592	232098611	rs1007544093	232098595	G	A	0	GGGTGGGCGGGCACCATGGG	GGGTAGGCGGGCACCATGGG	0	0
LDB3	chr10	88474920	88474947	rs1007547762	88474941	T	G	0	GGGGTGGGGGGCAGAGGCGGGGTGTGGG	GGGGTGGGGGGCAGAGGCGGGGGGTGGG	0	0
SUGCT	chr7	40432042	40432065	rs1007559470	40432061	G	T	0	GGGTAGAGGGTAATGGGTGGGGGG	GGGTAGAGGGTAATGGGTGGTGGG	0	0
CRELD1	chr3	9982350	9982375	rs1007580964	9982351	G	A	0	GGGAGAGGGAGACCATGGGGAGAGGG	GGAAGAGGGAGACCATGGGGAGAGGG	1	1
FGGY	chr1	60094739	60094760	rs1007632453	60094750	T	A	0	GGGATGGGGGGATAGGGGAGGG	GGGATGGGGGGAAAGGGGAGGG	0	0
STK11	chr19	1195324	1195356	rs1007665773	1195328	A	G	0	GGGGAACGTGGGGTCAGCGAGGGGTTCTAGGGG	GGGGAGCGTGGGGTCAGCGAGGGGTTCTAGGGG	0	0
PTPRO	chr12	15669497	15669516	rs1007696085	15669506	A	G	0	GGGGGAGGGCAGGGGGAGGG	GGGGGAGGGCGGGGGGAGGG	0	0
MICB	chr6	31466074	31466104	rs1007771130	31466086	C	G	0	GGGAGCGGCGGGGCGTTTCCGGGGGTCCGGG	GGGAGCGGCGGGGGGTTTCCGGGGGTCCGGG	0	0
STK11	chr19	1215068	1215098	rs1007788319	1215090	G	A	0	GGGGAACAAGGGGATCTGGGGCTGAGCCGGG	GGGGAACAAGGGGATCTGGGGCTAAGCCGGG	1	1
MSH2	chr2	47743902	47743926	rs1007821859	47743916	G	A	0	GGGAAGAAGGGGAAGGGGAAGAGGG	GGGAAGAAGGGGAAGAGGAAGAGGG	0	0
LDLRAP1	chr1	25871055	25871079	rs1007830794	25871073	G	A	0	GGGGCGTCTGGGAGGCTGGGAGGGG	GGGGCGTCTGGGAGGCTGGAAGGGG	0	0
COL4A3	chr2	228093260	228093279	rs1007890555	228093278	G	A	0	GGGCTGGGCTGGGCTGCGGG	GGGCTGGGCTGGGCTGCGGA	0	0
CAV3	chr3	8802074	8802092	rs1007942594	8802082	C	T	0	GGGCGAGGGCTTGGGAGGG	GGGCGAGGGTTTGGGAGGG	0	0
NFIX	chr19	13134990	13135015	rs1007972004	13134994	A	G	0	GGGAAAAAGGGTGAAGGGGTTGTGGG	GGGAAGAAGGGTGAAGGGGTTGTGGG	0	0
ERC1	chr12	1589896	1589917	rs1008078234	1589904	T	G	0	GGGAGGGGGTGTGGGTAGTGGG	GGGAGGGGGGGTGGGTAGTGGG	0	0
EIF2B5	chr3	184387282	184387307	rs1008084638	184387286	T	G	0	GGGGGTGTGGGGAGGGGCTGAAGGGG	GGGGGGGTGGGGAGGGGCTGAAGGGG	0	0
MYLK2	chr20	30418546	30418577	rs1008093950	30418566	G	C	0	GGGTTTGCACGGGCCTGGTGGGAGAGGGAGGG	GGGTTTGCACGGGCCTGGTGGCAGAGGGAGGG	0	0
PADI4	chr1	17683264	17683290	rs1008184033	17683286	A	G	0	GGGGTTGGCTGGGCAAACGGGGCAGGG	GGGGTTGGCTGGGCAAACGGGGCGGGG	0	0
ZBTB16	chr11	113959861	113959887	rs1008201190	113959877	A	G	0	GGGAGTGGCGGGCAGGGATCTGCGGGG	GGGAGTGGCGGGCAGGGGTCTGCGGGG	0	0
KCNQ4	chr1	41284799	41284826	rs1008220796	41284820	T	G	0	GGGGTGAGGGTGGGGGTGGGAATGGGGG	GGGGTGAGGGTGGGGGTGGGAAGGGGGG	0	0
MYH14	chr19	50707097	50707114	rs1008271038	50707102	T	G	0	GGGAGGTGGGGGGGCGGG	GGGAGGGGGGGGGGCGGG	0	0
BMPER	chr7	33945436	33945453	rs1008288235	33945448	T	G	0	GGGGATGGGAGGGTGGGG	GGGGATGGGAGGGGGGGG	0	0
SETBP1	chr18	42475153	42475183	rs1008322685	42475165	A	G	0	GGGAGGGGAGGGGAGGGGAGGGAAGAAAGGG	GGGAGGGGAGGGGGGGGGAGGGAAGAAAGGG	0	0
ADCK3	chr1	227164022	227164048	rs1008333708	227164042	G	A	0	GGGCTGCGGGGCTGCGGGACTGCGGGG	GGGCTGCGGGGCTGCGGGACTACGGGG	1	1
POMK	chr8	42948723	42948750	rs1008445380	42948726	T	G	0	GGGGTGAGAGGGCGAAGGGGCGAGGGGG	GGGGGGAGAGGGCGAAGGGGCGAGGGGG	0	0
CFD	chr19	862136	862163	rs1008447006	862158	T	G	0	GGGGGCGGGGCATGTGGGTAGGGTGGGG	GGGGGCGGGGCATGTGGGTAGGGGGGGG	0	0
XPNPEP3	chr22	41347792	41347823	rs1008466325	41347814	T	G	0	GGGAAGGACAGGGTAGGGTGGGGTGGGGTGGG	GGGAAGGACAGGGTAGGGTGGGGGGGGGTGGG	1	1
ADIPOQ	chr3	186570970	186571000	rs1008552221	186570974	T	A	0	GGGCATCCCAGGGCATCCGGGCCATAATGGG	GGGCAACCCAGGGCATCCGGGCCATAATGGG	0	0
DPP10	chr2	115428108	115428129	rs1008625492	115428123	G	T	0	GGGGTGGGGGGAGTGGGGAGGG	GGGGTGGGGGGAGTGGTGAGGG	0	0
GNAL	chr18	11689986	11690013	rs1008644864	11690007	C	G	0	GGGCCCGCGGGGGCGGCGGGCACCGGGG	GGGCCCGCGGGGGCGGCGGGCAGCGGGG	0	0
CD96	chr3	111205960	111205981	rs1008662712	111205974	G	T	0	GGGGCGGGGAGTGAGGGGAGGG	GGGGCGGGGAGTGAGTGGAGGG	0	0
CDH23	chr10	73510849	73510873	rs1008721488	73510850	G	A	0	GGGGTTGAGGGGCTGGGCTTCTGGG	GGAGTTGAGGGGCTGGGCTTCTGGG	0	0
UPB1	chr22	24890377	24890403	rs1008789365	24890395	C	T	0	GGGCAGGGCTGAAAAGGGGCCCTAGGG	GGGCAGGGCTGAAAAGGGGTCCTAGGG	0	0
MLH1	chr3	37055669	37055695	rs1008792324	37055681	A	G	0	GGGTAGGTGGGTGAGTGGGTGGGTGGG	GGGTAGGTGGGTGGGTGGGTGGGTGGG	0	0
SLC25A38	chr3	39425289	39425316	rs1008949289	39425310	C	A	0	GGGCACTGCGGGGAAGGAAGGGCAGGGG	GGGCACTGCGGGGAAGGAAGGGAAGGGG	0	0
DPP6	chr7	154447876	154447905	rs1008982155	154447885	G	A	0	GGGAGGTGGGGGGAGAGCTGGGAGAAGGGG	GGGAGGTGGGAGGAGAGCTGGGAGAAGGGG	0	0
FBLN1	chr22	45958452	45958476	rs1009074176	45958474	G	C	0	GGGCAAGGGCCTGGGAAGGGCAGGG	GGGCAAGGGCCTGGGAAGGGCAGCG	0	0
RAI1	chr17	17673404	17673425	rs1009123678	17673424	G	A	0	GGGAGGGGCGGGAGGATGAGGG	GGGAGGGGCGGGAGGATGAGGA	0	0
MED25	chr19	50340044	50340073	rs1009139316	50340062	G	A	0	GGGCCCTCCTGGGCCCAAGGGCCTACTGGG	GGGCCCTCCTGGGCCCAAGAGCCTACTGGG	0	0
CDH23	chr10	73495187	73495212	rs1009208666	73495189	T	G	0	GGGTTGCAATGGGAGTGGGTCCAGGG	GGGGTGCAATGGGAGTGGGTCCAGGG	0	0
CAMTA1	chr1	7493810	7493828	rs1009225173	7493820	G	A	0	GGGCTGGGAGGGAAGTGGG	GGGCTGGGAGGAAAGTGGG	0	0
EIF2B5	chr3	184369319	184369341	rs1009239363	184369340	G	T	0	GGGAAAGGGGTTGCGGGGAGGGG	GGGAAAGGGGTTGCGGGGAGGGT	0	0
CDH23	chr10	73372397	73372414	rs1009270819	73372400	G	A	0	GGGGGGGCTGGGGAGGGG	GGGGAGGCTGGGGAGGGG	0	0
CD81	chr11	2405765	2405790	rs1009305613	2405768	T	G	0	GGGGTGGGGCATCTCGGGAGGTGGGG	GGGGGGGGGCATCTCGGGAGGTGGGG	0	0
WDR62	chr19	36560898	36560923	rs1009383636	36560915	G	A	0	GGGAGAGGGAGACCGTGGGGAGAGGG	GGGAGAGGGAGACCGTGGAGAGAGGG	1	1
NCF4	chr22	37270681	37270703	rs1009461385	37270699	G	A	0	GGGGGCAGAGGGGCAGGGAGGGG	GGGGGCAGAGGGGCAGGGAAGGG	0	0
ARHGEF10	chr8	1790174	1790204	rs1009601662	1790201	G	C	0	GGGCCGCGGCGGGAACTGGGGCCGCGGCGGG	GGGCCGCGGCGGGAACTGGGGCCGCGGCCGG	1	1
KIF22	chr16	29816366	29816394	rs1009611332	29816385	G	T	0	GGGGGAGGGCGGGGGCGGGGGAGACCGGG	GGGGGAGGGCGGGGGCGGGGTAGACCGGG	1	1
KAT6B	chr10	76586705	76586729	rs1009626739	76586728	G	A	0	GGGGGCGGGGGAAAGGGGAGGAGGG	GGGGGCGGGGGAAAGGGGAGGAGGA	0	0
TCN2	chr22	31013130	31013156	rs1009715099	31013153	G	A	0	GGGGAATGAGGGACAGGGGAGGCCGGG	GGGGAATGAGGGACAGGGGAGGCCAGG	1	1
PLCE1	chr10	95839207	95839228	rs1009730214	95839221	G	A	0	GGGGTGGGGAGCGAGGGGAGGG	GGGGTGGGGAGCGAGAGGAGGG	0	0
BCKDHA	chr19	41919255	41919279	rs1009752686	41919265	A	G	0	GGGGATTTGGGAGAAGGGAACTGGG	GGGGATTTGGGGGAAGGGAACTGGG	1	1
CAMTA1	chr1	6845866	6845890	rs1009766629	6845875	T	G	0	GGGGGCGGGCTGGGGCCGGAGGGGG	GGGGGCGGGCGGGGGCCGGAGGGGG	0	0
CAT	chr11	34460796	34460820	rs1009852536	34460800	G	T	0	GGGGAGGGGGGTCCGGGTAGTGGGG	GGGGATGGGGGTCCGGGTAGTGGGG	0	0
POLR1C	chr6	43477757	43477780	rs1009869364	43477779	G	A	0	GGGCGCGGGCCGGGCTGAAGTGGG	GGGCGCGGGCCGGGCTGAAGTGGA	0	0
SDHC	chr1	161332591	161332616	rs1009879447	161332602	G	T	0	GGGGATGGGCCGGGTTGGGGGGTGGG	GGGGATGGGCCGTGTTGGGGGGTGGG	0	0
JPH3	chr16	87635694	87635714	rs1009882285	87635704	G	C	0	GGGGGCGGGCAGGGGCGAGGG	GGGGGCGGGCACGGGCGAGGG	0	0
MVK	chr12	110028752	110028782	rs1009882862	110028768	G	A	0	GGGTTATAGGGGGTGTGGTGGGTGGTGGGGG	GGGTTATAGGGGGTGTGATGGGTGGTGGGGG	0	0
GRHL2	chr8	102619866	102619891	rs1009904531	102619876	C	T	0	GGGCTGGGGGGCACTCCTGGGAGGGG	GGGCTGGGGGGTACTCCTGGGAGGGG	0	0
CAMTA1	chr1	7074876	7074897	rs1009909982	7074887	G	A	0	GGGGGCCGGGTGGGGGAGCGGG	GGGGGCCGGGTGAGGGAGCGGG	0	0
ATXN7	chr3	63980913	63980936	rs1010127130	63980919	G	C	0	GGGAACGGGGGCGTTGGGGGTGGG	GGGAACGCGGGCGTTGGGGGTGGG	0	0
JPH3	chr16	87718474	87718497	rs1010249413	87718486	T	G	0	GGGGCGTGGAGGGTGTGGGGTGGG	GGGGCGTGGAGGGGGTGGGGTGGG	0	0
MSH2	chr2	47742759	47742783	rs1010259866	47742775	G	C	0	GGGTGGGGAGCCCAGGGGAGTGGGG	GGGTGGGGAGCCCAGGGCAGTGGGG	0	0
NDUFAF2	chr5	60333888	60333914	rs1010277690	60333897	A	G	0	GGGGGGTGGGAGGGAGGGAGGCGGGGG	GGGGGGTGGGGGGGAGGGAGGCGGGGG	0	0
B4GALT7	chr5	177031894	177031914	rs1010311127	177031912	G	A	0	GGGGATTAGGGAAAGGGAGGG	GGGGATTAGGGAAAGGGAGAG	0	0
EHBP1	chr2	62933220	62933242	rs1010347729	62933236	T	G	0	GGGGCCGGGGCTCGGGGTCCGGG	GGGGCCGGGGCTCGGGGGCCGGG	0	0
EPHB2	chr1	23137111	23137132	rs1010364386	23137126	A	G	0	GGGTGGGGATCAGGGCAGGGGG	GGGTGGGGATCAGGGCGGGGGG	0	0
GPR98	chr5	89892605	89892630	rs1010382428	89892621	G	C	0	GGGAGAGGGAGACCATGGGGAGAGGG	GGGAGAGGGAGACCATGCGGAGAGGG	1	1
RIMS1	chr6	72704562	72704579	rs1010417574	72704565	A	G	0	GGGGAAGGGAAGGGCGGG	GGGGGAGGGAAGGGCGGG	0	0
SPECC1L	chr22	24759880	24759907	rs1010525405	24759897	T	G	0	GGGCGGTGGGGGTGGGGGTGGGGGTGGG	GGGCGGTGGGGGTGGGGGGGGGGGTGGG	0	0
IL21R	chr16	27416985	27417007	rs1010528115	27416996	G	A	0	GGGGAGGGAGAGGGGGCAATGGG	GGGGAGGGAGAGAGGGCAATGGG	0	0
DPP6	chr7	154099684	154099705	rs1010572474	154099697	G	T	0	GGGTTGGGGGGAGGGGGGAGGG	GGGTTGGGGGGAGGTGGGAGGG	0	0
PIGL	chr17	16223571	16223601	rs1010703582	16223577	A	G	0	GGGAGGAAGGGGAGGAGAGGGGAGGGGAGGG	GGGAGGAGGGGGAGGAGAGGGGAGGGGAGGG	0	0
RIMS1	chr6	72722035	72722055	rs1010715127	72722048	G	A	0	GGGTGGGGGAAAGAGGGTGGG	GGGTGGGGGAAAGAAGGTGGG	0	0
C10orf11	chr10	77496687	77496713	rs1010747815	77496698	C	T	0	GGGTGGGGAAGGCAGGGCTGGGATGGG	GGGTGGGGAAGGTAGGGCTGGGATGGG	0	0
GRHL2	chr8	102517854	102517876	rs1010766027	102517865	A	G	0	GGGGCTTGTGGGAGGGTTGAGGG	GGGGCTTGTGGGGGGGTTGAGGG	0	0
NAT8L	chr4	2061434	2061461	rs1010820471	2061437	C	G	0	GGGGCGGGGGGCGCGGGGCCGCCGGGGG	GGGGGGGGGGGCGCGGGGCCGCCGGGGG	0	0
KCNQ1	chr11	2688799	2688829	rs1010860038	2688820	T	G	0	GGGGCAGGGGGTCGGGGCGGGGTTGGGCGGG	GGGGCAGGGGGTCGGGGCGGGGGTGGGCGGG	0	0
COL18A1	chr21	46929918	46929945	rs1010910185	46929921	C	T	0	GGGGCCTGGGTGCAGGGGGCAGCGTGGG	GGGGTCTGGGTGCAGGGGGCAGCGTGGG	0	0
GABRA1	chr5	161275512	161275540	rs1010922667	161275533	C	G	0	GGGGGGGGGGGGCGGGGGGAGACGGGGGG	GGGGGGGGGGGGCGGGGGGAGAGGGGGGG	0	0
GHR	chr5	42423948	42423975	rs1010971976	42423960	G	A	0	GGGCGGCGGCGGGGACCCCGGGCTGGGG	GGGCGGCGGCGGGAACCCCGGGCTGGGG	1	1
COL6A1	chr21	47403763	47403788	rs1010994536	47403765	A	G	0	GGGAGGGTGGGTGGGGCAGAGGTGGG	GGGGGGGTGGGTGGGGCAGAGGTGGG	0	0
NOS1AP	chr1	162330759	162330776	rs1011038818	162330772	T	G	0	GGGTGGGTTGAGGGTGGG	GGGTGGGTTGAGGGGGGG	0	0
AMPD3	chr11	10467581	10467605	rs1011189816	10467594	G	A	0	GGGGTGGGGTGAGGGTGACAGTGGG	GGGGTGGGGTGAGGATGACAGTGGG	1	1
TTC7A	chr2	47199101	47199127	rs1011226229	47199117	G	A	0	GGGAGGGAGGGAGGCAGGGAGGGAGGG	GGGAGGGAGGGAGGCAGAGAGGGAGGG	0	0
MYPN	chr10	69944933	69944960	rs1011343600	69944948	G	A	0	GGGAAGGAGGGAAGGAGGGAAGGAAGGG	GGGAAGGAGGGAAGGAAGGAAGGAAGGG	0	0
SLC34A2	chr4	25666722	25666751	rs1011410944	25666731	G	A	0	GGGAGAGTTGGGGAGGTGGGCATTCATGGG	GGGAGAGTTGAGGAGGTGGGCATTCATGGG	0	0
ING1	chr13	111366907	111366933	rs1011415256	111366920	A	G	0	GGGTGCTGCGGGGGAGGGGGCGGCGGG	GGGTGCTGCGGGGGGGGGGGCGGCGGG	0	0
RIN2	chr20	19910730	19910758	rs1011473308	19910747	G	A	0	GGGGGCTGGGGCTGGGGGGGATGCGAGGG	GGGGGCTGGGGCTGGGGGAGATGCGAGGG	0	0
DPP10	chr2	115245805	115245830	rs1011478555	115245813	C	T	0	GGGAAGCAACGGGACAGGGGTGTGGG	GGGAAGCAATGGGACAGGGGTGTGGG	1	1
FIP1L1	chr4	54768045	54768068	rs1011521972	54768047	A	G	0	GGGAGGGGTTGAGGGAGGGAGGGG	GGGGGGGGTTGAGGGAGGGAGGGG	0	0
FLNC	chr7	128485882	128485908	rs1011543430	128485894	T	G	0	GGGAGTTGGGGAGTGGGAGAGGAGGGG	GGGAGTTGGGGAGGGGGAGAGGAGGGG	0	0
ANO3	chr11	26558575	26558594	rs1011549539	26558590	T	G	0	GGGGACGGGGACTGGGTGGG	GGGGACGGGGACTGGGGGGG	1	1
CAMTA1	chr1	7661999	7662024	rs1011561226	7662023	G	T	0	GGGAGAGGGAGACCGTGGGGAGAGGG	GGGAGAGGGAGACCGTGGGGAGAGGT	1	1
CNTNAP2	chr7	147928408	147928432	rs1011677938	147928425	G	A	0	GGGGATGAATGGGTTTGGGGGAGGG	GGGGATGAATGGGTTTGGAGGAGGG	0	0
LMNA	chr1	156052611	156052635	rs1011688679	156052617	C	G	0	GGGGGGGCCGGGGCCGGGGGCGGGG	GGGGGGGGCGGGGCCGGGGGCGGGG	0	0
RAI1	chr17	17712399	17712421	rs1011781470	17712405	A	G	0	GGGAGGGAGGGAGGGACTGAGGG	GGGAGGGGGGGAGGGACTGAGGG	1	1
SLC22A18	chr11	2923336	2923353	rs1011791842	2923339	G	A	0	GGGCGGGGCAGGGGCGGG	GGGCAGGGCAGGGGCGGG	0	0
DIS3L2	chr2	233112327	233112357	rs1011808579	233112335	G	C	0	GGGGGGGGGGGGGGGGGGGCGGGGGGGAGGG	GGGGGGGGGCGGGGGGGGGCGGGGGGGAGGG	0	0
TUSC3	chr8	15304245	15304270	rs1011891631	15304249	A	G	0	GGGGGAGGGAGGGGGGAGGGGGAGGG	GGGGGGGGGAGGGGGGAGGGGGAGGG	0	0
HSF4	chr16	67199550	67199571	rs1011901464	67199560	G	A	0	GGGCGGGGAGCGGGGATGGGGG	GGGCGGGGAGCAGGGATGGGGG	0	0
IFT122	chr3	129219606	129219629	rs1011992057	129219615	T	C	0	GGGCTGTGGGTTGGGGGAAGTGGG	GGGCTGTGGGCTGGGGGAAGTGGG	0	0
SLC3A1	chr2	44517929	44517956	rs1012022281	44517938	G	A	0	GGGGTTGTGGGGTTGTGGGGTTGTGGGG	GGGGTTGTGGAGTTGTGGGGTTGTGGGG	0	0
CAMTA1	chr1	7219022	7219048	rs1012082966	7219031	G	A	0	GGGGTGAGGTGGGGGTGGGGTAATGGG	GGGGTGAGGTAGGGGTGGGGTAATGGG	0	0
MAP2K1	chr15	66679484	66679501	rs1012104352	66679497	G	A	0	GGGCGGGTGGGGCGGGGG	GGGCGGGTGGGGCGAGGG	0	0
MPST	chr22	37416111	37416137	rs1012118782	37416127	T	G	0	GGGTGGGGAGCCTTGGGTGGAAGTGGG	GGGTGGGGAGCCTTGGGGGGAAGTGGG	0	0
CNTNAP2	chr7	147876668	147876697	rs1012171832	147876669	G	A	0	GGGGTGCGGGGGAGAGAGAGGGAGGGAGGG	GGAGTGCGGGGGAGAGAGAGGGAGGGAGGG	0	0
SLC24A4	chr14	92789130	92789151	rs1012173961	92789147	G	C	0	GGGTGGCGGGGTGGGGAGGGGG	GGGTGGCGGGGTGGGGAGCGGG	0	0
CNTNAP2	chr7	147499862	147499889	rs1012196792	147499883	A	G	0	GGGGAGAGGGAGAGGGAGGGGGAGGGGG	GGGGAGAGGGAGAGGGAGGGGGGGGGGG	0	0
RTEL1	chr20	62323671	62323700	rs1012197668	62323698	G	C	0	GGGGCCTGGGCTGGCGAGGGCCTGGGTGGG	GGGGCCTGGGCTGGCGAGGGCCTGGGTGCG	0	0
SEPN1	chr1	26142377	26142407	rs1012232074	26142387	G	A	0	GGGTAGACAAGGGATGCCTGGGCTGACTGGG	GGGTAGACAAGAGATGCCTGGGCTGACTGGG	2	2
NFIX	chr19	13207664	13207693	rs1012251823	13207687	T	G	0	GGGGCTGCCCGGGCGGGCAGGGGGTGGGGG	GGGGCTGCCCGGGCGGGCAGGGGGGGGGGG	0	0
KCNQ1	chr11	2863499	2863525	rs1012312035	2863522	G	C	0	GGGTGAAGGGCTCTGGGGGACAGGGGG	GGGTGAAGGGCTCTGGGGGACAGGCGG	1	1
CDH3	chr16	68744909	68744927	rs1012322508	68744913	G	C	0	GGGGAGGGGAGGGGAGGGG	GGGGACGGGAGGGGAGGGG	0	0
EIF2B5	chr3	183990148	183990174	rs1012333847	183990151	A	G	0	GGGGAGGGGAGGGGAGGGGAGGGGGGG	GGGGGGGGGAGGGGAGGGGAGGGGGGG	0	0
RAI1	chr17	17696109	17696131	rs1012335152	17696111	T	G	0	GGGTGGGGAGGTGGGTGGGAGGG	GGGGGGGGAGGTGGGTGGGAGGG	0	0
VEGFA	chr6	43739496	43739523	rs1012391787	43739516	G	A	0	GGGGGCAGGGCGCAGGAGGGAGAGGGGG	GGGGGCAGGGCGCAGGAGGGAAAGGGGG	0	0
C10orf11	chr10	77510237	77510263	rs1012416896	77510258	G	A	0	GGGGCGGGGGGTGGGGGGCAGAGGGGG	GGGGCGGGGGGTGGGGGGCAGAAGGGG	0	0
LOXL1	chr15	74227915	74227944	rs1012437363	74227940	G	A	0	GGGCCTGCAAGGGCGGGGAGGGCTCAGGGG	GGGCCTGCAAGGGCGGGGAGGGCTCAAGGG	0	0
KCNQ1	chr11	2859862	2859887	rs1012496986	2859865	C	T	0	GGGCCCAGGGTAGGGGAGGATGTGGG	GGGCTCAGGGTAGGGGAGGATGTGGG	0	0
DPP6	chr7	154049749	154049778	rs1012515374	154049762	G	A	0	GGGGCCTATTGGGGGGTGTGGGGTAAGGGG	GGGGCCTATTGGGGAGTGTGGGGTAAGGGG	0	0
LEPR	chr1	65991672	65991692	rs1012672291	65991683	T	G	0	GGGCGGCGGGGGTGGGGTGGG	GGGCGGCGGGGGGGGGGTGGG	0	0
FRAS1	chr4	79054526	79054549	rs1012726829	79054532	G	C	0	GGGAAGGGTAGTGGGGTGGGAGGG	GGGAAGGCTAGTGGGGTGGGAGGG	0	0
COLEC11	chr2	3660759	3660784	rs1012816013	3660773	G	C	0	GGGGAGGGAGGTAGGGAGAGAAGGGG	GGGGAGGGAGGTAGGCAGAGAAGGGG	0	0
GATA4	chr8	11550168	11550197	rs1012928091	11550175	G	T	0	GGGTGCGTGCGGGGGTGCGGGGGTGAGGGG	GGGTGCGTTCGGGGGTGCGGGGGTGAGGGG	0	0
UNG	chr12	109535631	109535656	rs1012971028	109535647	T	G	0	GGGCCGGGGCTAGGGGGTGAAGGGGG	GGGCCGGGGCTAGGGGGGGAAGGGGG	0	0
FBLN1	chr22	45923431	45923453	rs1012999227	45923449	A	G	0	GGGCGGGGCAGGGATGTTGAGGG	GGGCGGGGCAGGGATGTTGGGGG	0	0
ZNF592	chr15	85337324	85337344	rs1013037919	85337327	G	T	0	GGGTGGGGGGCTAGGGGAGGG	GGGTTGGGGGCTAGGGGAGGG	0	0
EGF	chr4	110914104	110914125	rs1013039810	110914110	G	C	0	GGGGTGGGGGGAGGGGGGAGGG	GGGGTGGCGGGAGGGGGGAGGG	0	0
USB1	chr16	58047505	58047522	rs1013090294	58047508	T	G	0	GGGGTGGGTGGGTGGGGG	GGGGGGGGTGGGTGGGGG	0	0
RPIA	chr2	89020723	89020751	rs1013094471	89020730	C	T	0	GGGCCTGTCAGGGGGTGAGGGGCTAGGGG	GGGCCTGTTAGGGGGTGAGGGGCTAGGGG	0	0
BMPR1B	chr4	95738883	95738902	rs1013094999	95738899	G	A	0	GGGTCAGGGTGTGGGAAGGG	GGGTCAGGGTGTGGGAAAGG	0	0
CAMTA1	chr1	7574548	7574572	rs1013114304	7574562	T	G	0	GGGAGCACCAGGGGCTGGGAAGGGG	GGGAGCACCAGGGGCGGGGAAGGGG	0	0
NOS1AP	chr1	162179558	162179582	rs1013115014	162179575	C	A	0	GGGGGCGGGGGGCAAGGGCAGGGGG	GGGGGCGGGGGGCAAGGGAAGGGGG	0	0
HLA-DRA	chr6	32408066	32408088	rs1013138960	32408076	T	G	0	GGGGGTGGGGGTGGGGGTGGGGG	GGGGGTGGGGGGGGGGGTGGGGG	0	0
GPR98	chr5	90082056	90082085	rs1013179881	90082063	T	C	0	GGGGCCTATTGGGGGGTGGGGGGCTAGGGG	GGGGCCTACTGGGGGGTGGGGGGCTAGGGG	0	0
AQP1	chr7	30918257	30918275	rs1013214601	30918268	G	A	0	GGGATGGGGTGGGACAGGG	GGGATGGGGTGGAACAGGG	1	1
PLCB4	chr20	9274051	9274068	rs1013231874	9274062	G	A	0	GGGAAGGGAAGGGAAGGG	GGGAAGGGAAGGAAAGGG	0	0
STK11	chr19	1226665	1226689	rs1013256379	1226684	T	G	0	GGGGCGCGGCGGGGCCCGGGTGGGG	GGGGCGCGGCGGGGCCCGGGGGGGG	0	0
NDUFV1	chr11	67376240	67376270	rs1013384145	67376243	T	G	0	GGGGTGGCTGGGGTTTCCCTGGGCCTTTGGG	GGGGGGGCTGGGGTTTCCCTGGGCCTTTGGG	0	0
GM2A	chr5	150596965	150596987	rs1013384952	150596976	G	A	0	GGGGCTGGGGGTGAGAGGGTGGG	GGGGCTGGGGGTAAGAGGGTGGG	0	0
KCNQ1	chr11	2812927	2812957	rs1013397363	2812953	C	T	0	GGGTGGGGGTGGGGGGCCCGGGCCTCCCGGG	GGGTGGGGGTGGGGGGCCCGGGCCTCCTGGG	0	0
GPR98	chr5	90439874	90439902	rs1013427019	90439896	G	T	0	GGGAGCGGGCCTGCAGGGGCAGTGGGGGG	GGGAGCGGGCCTGCAGGGGCAGTTGGGGG	0	0
BLK	chr8	11417650	11417676	rs1013475793	11417667	G	A	0	GGGTGGGTGGGTGGGTGGGTGGGTGGG	GGGTGGGTGGGTGGGTGGATGGGTGGG	0	0
KALRN	chr3	124400016	124400042	rs1013589093	124400035	C	T	0	GGGCACAGAGGGATGTGGGGCCAGGGG	GGGCACAGAGGGATGTGGGGTCAGGGG	0	0
NFIX	chr19	13118286	13118309	rs1013591536	13118308	G	C	0	GGGCCACCAGGGGGCTAGGGTGGG	GGGCCACCAGGGGGCTAGGGTGGC	0	0
MYLK2	chr20	30414334	30414355	rs1013635197	30414354	G	A	0	GGGTGCGGGTATGGAGGGTGGG	GGGTGCGGGTATGGAGGGTGGA	0	0
CNTNAP2	chr7	146538457	146538483	rs1013644925	146538481	G	A	0	GGGGGTTGGGTGGGGGGAAGGGGAGGG	GGGGGTTGGGTGGGGGGAAGGGGAGAG	0	0
CA4	chr17	58231599	58231627	rs1013656266	58231610	A	G	0	GGGGTGGGTGGGAGGGGTGGGGGGGAGGG	GGGGTGGGTGGGGGGGGTGGGGGGGAGGG	0	0
RAI1	chr17	17695888	17695905	rs1013706339	17695892	G	C	0	GGGCGGGGGGGGGGCGGG	GGGCGCGGGGGGGGCGGG	0	0
RAD51B	chr14	69020425	69020453	rs1013730192	69020448	T	G	0	GGGTGGAGGTGGGTGGGGGGAGGGTGGGG	GGGTGGAGGTGGGTGGGGGGAGGGGGGGG	0	0
CCND1	chr11	69464525	69464545	rs1013798012	69464537	G	A	0	GGGTCATGGGCGAGGGACGGG	GGGTCATGGGCGAAGGACGGG	0	0
AANAT	chr17	74459226	74459248	rs1013866245	74459235	G	A	0	GGGATGGGGTGGGGGCCGTGGGG	GGGATGGGGTAGGGGCCGTGGGG	0	0
DPP6	chr7	154036375	154036398	rs1013872999	154036376	G	T	0	GGGACGTGGGGTGGTGGGACAGGG	GGTACGTGGGGTGGTGGGACAGGG	1	1
RARA	chr17	38483461	38483485	rs1013930861	38483468	G	A	0	GGGAGCAAGGGTGGGTTCCAGAGGG	GGGAGCAAAGGTGGGTTCCAGAGGG	0	0
CACNA1H	chr16	1208940	1208961	rs1013940972	1208948	C	T	0	GGGACCGGGCAGGGGTCTCGGG	GGGACCGGGTAGGGGTCTCGGG	1	1
ERBB3	chr12	56476951	56476974	rs1013960957	56476970	G	A	0	GGGGTGTCTAGGGACAGGGTGGGG	GGGGTGTCTAGGGACAGGGTAGGG	1	1
ARHGEF10	chr8	1874180	1874203	rs1014091903	1874193	T	G	0	GGGAGAGGCTGGGGTGGGACAGGG	GGGAGAGGCTGGGGGGGGACAGGG	1	1
EIF2B5	chr3	184135228	184135254	rs1014156170	184135245	C	T	0	GGGGCCATGGGCGGGGGGCGGAGAGGG	GGGGCCATGGGCGGGGGGTGGAGAGGG	0	0
ALDH5A1	chr6	24495896	24495918	rs1014244599	24495916	G	A	0	GGGGCGGGGAGAAAGGGGAGGGG	GGGGCGGGGAGAAAGGGGAGGAG	0	0
RAB33B	chr4	140374995	140375020	rs1014349110	140375003	T	G	0	GGGGCTGGGTCAGTCAGGGCGCTGGG	GGGGCTGGGGCAGTCAGGGCGCTGGG	0	0
RYR1	chr19	38992963	38992987	rs1014426543	38992986	G	A	0	GGGGTGGGGGCTGTGGGCATAGGGG	GGGGTGGGGGCTGTGGGCATAGGGA	0	0
RTEL1	chr20	62327417	62327439	rs1014441040	62327438	G	C	0	GGGGTCTGGGGTGGGTTTCTGGG	GGGGTCTGGGGTGGGTTTCTGGC	0	0
EIF2B5	chr3	184117210	184117239	rs1014446065	184117229	T	G	0	GGGGCACGGCGGGGGGTGGGTGGGGGCGGG	GGGGCACGGCGGGGGGTGGGGGGGGGCGGG	0	0
DSG4	chr18	28992334	28992359	rs1014452140	28992340	A	G	0	GGGTAGTAGGGAGGGGAAACAGTGGG	GGGTAGTGGGGAGGGGAAACAGTGGG	1	1
EIF2B5	chr3	183947006	183947030	rs1014511909	183947015	T	G	0	GGGCAGGGGGTGGGGTGGGCTGGGG	GGGCAGGGGGGGGGGTGGGCTGGGG	0	0
KCNQ1	chr11	2547371	2547398	rs1014523885	2547376	G	A	0	GGGCCGGGAGGAGCTGGGGTGATCTGGG	GGGCCGAGAGGAGCTGGGGTGATCTGGG	0	0
ALPL	chr1	21890720	21890752	rs1014629656	21890722	G	A	0	GGGGGCAGCCGGGCAGGGACGGGGTGAGGCGGG	GGGAGCAGCCGGGCAGGGACGGGGTGAGGCGGG	0	0
DPP6	chr7	154067464	154067482	rs1014631315	154067479	G	A	0	GGGGGGGAGGGGGGATGGG	GGGGGGGAGGGGGGATAGG	0	0
SLC4A4	chr4	72317408	72317433	rs1014672884	72317424	G	C	0	GGGTGTGGTGGGTGTGTGGGGGTGGG	GGGTGTGGTGGGTGTGTCGGGGTGGG	0	0
CHD7	chr8	61648837	61648858	rs1014681564	61648850	G	T	0	GGGGGCTGGGTTGTGGGTGGGG	GGGGGCTGGGTTGTTGGTGGGG	0	0
BCMO1	chr16	81309522	81309545	rs1014689657	81309534	A	G	0	GGGTGTGGCTGGGAGGGGTGTGGG	GGGTGTGGCTGGGGGGGGTGTGGG	0	0
MED25	chr19	50340044	50340073	rs1014790750	50340071	G	A	0	GGGCCCTCCTGGGCCCAAGGGCCTACTGGG	GGGCCCTCCTGGGCCCAAGGGCCTACTGAG	0	0
ST3GAL3	chr1	44337840	44337871	rs1014820037	44337866	A	G	0	GGGAGAGGCTGGGGTGTGAGGGACAGGAGGGG	GGGAGAGGCTGGGGTGTGAGGGACAGGGGGGG	1	1
UPB1	chr22	24890920	24890945	rs1014953537	24890922	C	T	0	GGGCCCCTGAGGGAGGCGGGAGGGGG	GGGTCCCTGAGGGAGGCGGGAGGGGG	0	0
LOXL1	chr15	74227915	74227944	rs1014970331	74227917	C	T	0	GGGCCTGCAAGGGCGGGGAGGGCTCAGGGG	GGGTCTGCAAGGGCGGGGAGGGCTCAGGGG	0	0
SLC25A4	chr4	186064663	186064690	rs1015021400	186064665	C	G	0	GGGCGCGGGCGCGGCGGGCCGGGCGGGG	GGGGGCGGGCGCGGCGGGCCGGGCGGGG	0	0
SDHC	chr1	161330368	161330390	rs1015095723	161330376	T	G	0	GGGGGTGGGTGGTGGGGTAGGGG	GGGGGTGGGGGGTGGGGTAGGGG	0	0
DLEC1	chr3	38156255	38156278	rs1015119249	38156259	G	C	0	GGGCAGGTGGGTGGGTTGCCAGGG	GGGCACGTGGGTGGGTTGCCAGGG	0	0
DLEC1	chr3	38141261	38141286	rs1015128301	38141285	G	A	0	GGGGGCGGGGTGGGGGTGGGGGCGGG	GGGGGCGGGGTGGGGGTGGGGGCGGA	0	0
DNAJB6	chr7	157130035	157130056	rs1015185613	157130042	G	A	0	GGGGCCGGGGCCGGGGCTGGGG	GGGGCCGGAGCCGGGGCTGGGG	0	0
CNTNAP2	chr7	146866746	146866764	rs1015263838	146866750	G	A	0	GGGAGGGAGGGAGGGAGGG	GGGAGAGAGGGAGGGAGGG	0	0
GATA3	chr10	8096475	8096496	rs1015370735	8096490	C	G	0	GGGGCGGGAGGAGGGGCGGGGG	GGGGCGGGAGGAGGGGGGGGGG	0	0
ITPR1	chr3	4730338	4730359	rs1015416630	4730355	A	T	0	GGGAGGAGGGCAGGGAAGAGGG	GGGAGGAGGGCAGGGAAGTGGG	0	0
SEMA4A	chr1	156130947	156130979	rs1015419353	156130955	C	G	0	GGGGTGGGGCGGGGGACAGCGGGGCTGGGCGGG	GGGGTGGGGGGGGGGACAGCGGGGCTGGGCGGG	1	1
NPSR1	chr7	34860324	34860350	rs1015482764	34860331	T	G	0	GGGTTGGGTAGTGGGGGATGGGGTGGG	GGGTTGGGGAGTGGGGGATGGGGTGGG	0	0
SH3BP2	chr4	2797452	2797470	rs1015482903	2797469	G	T	0	GGGCGGTAGGGAGGGTGGG	GGGCGGTAGGGAGGGTGGT	0	0
FBLN1	chr22	45927593	45927619	rs1015556614	45927613	G	C	0	GGGCTGGCTGGGGAGGGGAAGGGTGGG	GGGCTGGCTGGGGAGGGGAAGCGTGGG	0	0
BMPR2	chr2	203388761	203388785	rs1015589546	203388770	G	A	0	GGGGAGAGAGGGAGAGGGGCAAGGG	GGGGAGAGAGAGAGAGGGGCAAGGG	0	0
NFIX	chr19	13118286	13118309	rs1015602122	13118289	C	T	0	GGGCCACCAGGGGGCTAGGGTGGG	GGGCTACCAGGGGGCTAGGGTGGG	0	0
PSTPIP1	chr15	77309036	77309057	rs1015606964	77309056	G	A	0	GGGGAGGGGGGGCACTGTTGGG	GGGGAGGGGGGGCACTGTTGGA	0	0
EIF2B5	chr3	184338621	184338643	rs1015648284	184338636	G	A	0	GGGTTTTTGGGGCAGGGCGGGGG	GGGTTTTTGGGGCAGGACGGGGG	0	0
ESRRB	chr14	76964963	76964987	rs1015661873	76964979	G	C	0	GGGTGCAGTGGGGTGGGGGACGGGG	GGGTGCAGTGGGGTGGGCGACGGGG	0	0
ABCG8	chr2	44104245	44104276	rs1015666837	44104258	A	G	0	GGGAGACTGTGGGAATATGGGGAGACCGTGGG	GGGAGACTGTGGGAGTATGGGGAGACCGTGGG	2	2
WWOX	chr16	79040281	79040301	rs1015717618	79040282	G	T	0	GGGCTGGGGAGGGGCATGGGG	GGTCTGGGGAGGGGCATGGGG	0	0
DCC	chr18	50867190	50867217	rs1015723160	50867196	C	G	0	GGGCAGGCAGGGTGTAGGGGGTGGGGGG	GGGCAGGGAGGGTGTAGGGGGTGGGGGG	0	0
CPS1	chr2	211458116	211458143	rs1015723275	211458121	G	T	0	GGGGAAGGGTGTTGGAGGGGAGAGAGGG	GGGGAATGGTGTTGGAGGGGAGAGAGGG	0	0
PLOD1	chr1	12031170	12031193	rs1015757942	12031182	A	G	0	GGGGCGGGGGGGCAGGGGTGAGGG	GGGGCGGGGGGGCGGGGGTGAGGG	0	0
EIF2B5	chr3	184311245	184311274	rs1015762546	184311261	G	A	0	GGGATGAACTGGGCTGGGGGCTAGGGAGGG	GGGATGAACTGGGCTGGAGGCTAGGGAGGG	1	1
DNM2	chr19	10859040	10859059	rs1015763853	10859042	T	G	0	GGGTGGGTGAGGGCCAGGGG	GGGGGGGTGAGGGCCAGGGG	0	0
DOK7	chr4	3475373	3475394	rs1015789465	3475374	G	A	0	GGGGGCCGGGGCCGGGCGGGGG	GGAGGCCGGGGCCGGGCGGGGG	0	0
BSG	chr19	575601	575630	rs1015803502	575616	A	G	0	GGGGTGGGTGGGGAGGAGGGCGGGTGGGGG	GGGGTGGGTGGGGAGGGGGGCGGGTGGGGG	0	0
TRPM4	chr19	49684717	49684740	rs1015841675	49684726	T	G	0	GGGTGAGGGGTCAGGGCCTGGGGG	GGGTGAGGGGGCAGGGCCTGGGGG	0	0
EGFR	chr7	55087408	55087435	rs1015950166	55087412	C	T	0	GGGTGCTGGTGGGCGCCTGGGGCCGGGG	GGGTGTTGGTGGGCGCCTGGGGCCGGGG	0	0
PTPRO	chr12	15669497	15669516	rs1015956380	15669512	A	G	0	GGGGGAGGGCAGGGGGAGGG	GGGGGAGGGCAGGGGGGGGG	0	0
KISS1R	chr19	918803	918820	rs1015975261	918813	G	C	0	GGGGACGGGGAGGGGGGG	GGGGACGGGGACGGGGGG	0	0
FLNC	chr7	128478530	128478559	rs1016025623	128478548	G	T	0	GGGGCTGTGTGGGGGTGGGGGGAGGCTGGG	GGGGCTGTGTGGGGGTGGGTGGAGGCTGGG	0	0
NPAS2	chr2	101506796	101506820	rs1016045624	101506817	G	T	0	GGGACAGGTGGGTGCAGGGAAGGGG	GGGACAGGTGGGTGCAGGGAAGTGG	1	1
FFAR4	chr10	95335695	95335717	rs1016098833	95335714	G	A	0	GGGCAGTGGGAGGGATTCTGGGG	GGGCAGTGGGAGGGATTCTGAGG	0	0
SYNGAP1	chr6	33388630	33388660	rs1016139017	33388638	T	G	0	GGGAGGCAGTGGGGGGTGGGGGGATGGAGGG	GGGAGGCAGGGGGGGGTGGGGGGATGGAGGG	0	0
DNASE1	chr16	3696483	3696513	rs1016208732	3696503	T	G	0	GGGCCATGGCGGGTGTAGGGGTTGGGTGGGG	GGGCCATGGCGGGTGTAGGGGGTGGGTGGGG	0	0
CHST3	chr10	73766467	73766485	rs1016221107	73766478	G	T	0	GGGTGGGTCAGGGATTGGG	GGGTGGGTCAGGTATTGGG	0	0
KALRN	chr3	124291065	124291094	rs1016221511	124291067	T	C	0	GGGTGGAGGTGGGGGAAGGGCTGCAGTGGG	GGGCGGAGGTGGGGGAAGGGCTGCAGTGGG	0	0
TRIOBP	chr22	38105270	38105296	rs1016237254	38105292	A	C	0	GGGCTCTGGGCTCCAGGGTCCCCAGGG	GGGCTCTGGGCTCCAGGGTCCCCCGGG	0	0
SH3BP2	chr4	2819590	2819613	rs1016238298	2819598	G	A	0	GGGCCCGGCGGGATGGGACCTGGG	GGGCCCGGCAGGATGGGACCTGGG	1	1
STAMBP	chr2	74056116	74056141	rs1016276197	74056127	G	A	0	GGGGAAAGGTGGGGAAGGGTCCCGGG	GGGGAAAGGTGGAGAAGGGTCCCGGG	0	0
PNKD	chr2	219137696	219137720	rs1016527264	219137711	A	C	0	GGGATGGGAGGGGCAGAGGGTGGGG	GGGATGGGAGGGGCAGCGGGTGGGG	0	0
GRHL2	chr8	102619866	102619891	rs1016548192	102619890	G	A	0	GGGCTGGGGGGCACTCCTGGGAGGGG	GGGCTGGGGGGCACTCCTGGGAGGGA	0	0
ARID1B	chr6	157304769	157304792	rs1016602474	157304774	G	A	0	GGGGCTGGGCTGAGGGGCTTAGGG	GGGGCTAGGCTGAGGGGCTTAGGG	0	0
ESRRB	chr14	76796353	76796377	rs1016686290	76796355	T	G	0	GGGTGGGGTGGGTGAGGGTCTGGGG	GGGGGGGGTGGGTGAGGGTCTGGGG	0	0
SMOC2	chr6	168895546	168895563	rs1016740558	168895551	G	T	0	GGGCCTGGGAGGGCTGGG	GGGCCTTGGAGGGCTGGG	0	0
LRIG2	chr1	113636246	113636267	rs1016802423	113636260	G	C	0	GGGGTGGGGGGAGGGGGCAGGG	GGGGTGGGGGGAGGGCGCAGGG	0	0
EIF2B5	chr3	184072516	184072545	rs1016845940	184072524	G	A	0	GGGTCAGAGGGTGAGGGAGGGGCCAACGGG	GGGTCAGAGAGTGAGGGAGGGGCCAACGGG	0	0
AP1S1	chr7	100803145	100803170	rs1016888099	100803146	G	A	0	GGGGAGAGATGGGGGGCGAGGGAGGG	GGAGAGAGATGGGGGGCGAGGGAGGG	0	0
COL9A3	chr20	61451461	61451485	rs1016889762	61451463	G	C	0	GGGGTGGAGGGGCAGAAGGGCAGGG	GGGCTGGAGGGGCAGAAGGGCAGGG	0	0
GCNT2	chr6	10584397	10584425	rs1016935803	10584405	G	T	0	GGGGCTATAGGGTGAAGGTGGGGAGAGGG	GGGGCTATATGGTGAAGGTGGGGAGAGGG	0	0
MLPH	chr2	238396315	238396337	rs1016951460	238396331	C	T	0	GGGTGGGAGTGGGATGGCGGGGG	GGGTGGGAGTGGGATGGTGGGGG	0	0
CAPN3	chr15	42689105	42689128	rs1016986038	42689123	A	G	0	GGGTAAGGGTGGGGAAGAGAGGGG	GGGTAAGGGTGGGGAAGAGGGGGG	0	0
FGGY	chr1	59883845	59883873	rs1017034537	59883871	G	A	0	GGGAAGAACTGGGGCAGGGGTTGAGTGGG	GGGAAGAACTGGGGCAGGGGTTGAGTGAG	1	1
SETBP1	chr18	42518031	42518053	rs1017226544	42518047	G	T	0	GGGAGTGGGGGAGCAGGGGAGGG	GGGAGTGGGGGAGCAGGTGAGGG	0	0
BFSP2	chr3	133142023	133142041	rs1017260471	133142031	G	A	0	GGGAGGGAGGGAAAGAGGG	GGGAGGGAGAGAAAGAGGG	0	0
EIF2B5	chr3	184097320	184097349	rs1017297795	184097348	G	T	0	GGGTGGTGAGGGTTTGGGGGGCGCTGTGGG	GGGTGGTGAGGGTTTGGGGGGCGCTGTGGT	0	0
MYD88	chr3	38181773	38181794	rs1017357344	38181781	G	A	0	GGGAAGGGTGCAGGGCCCAGGG	GGGAAGGGTACAGGGCCCAGGG	0	0
GRIK2	chr6	102335597	102335619	rs1017437866	102335614	A	G	0	GGGAGAGGGGGAAGGGGGAAGGG	GGGAGAGGGGGAAGGGGGGAGGG	0	0
CDH23	chr10	73569843	73569872	rs1017453640	73569869	G	A	0	GGGCCCACCCGGGGCCGGGGCAGTGGAGGG	GGGCCCACCCGGGGCCGGGGCAGTGGAAGG	0	0
IL6R	chr1	154391458	154391486	rs1017501205	154391463	G	A	0	GGGAGAGGGGGAGAGAGAGGGTGGTGGGG	GGGAGAAGGGGAGAGAGAGGGTGGTGGGG	0	0
MYLK2	chr20	30418741	30418765	rs1017506112	30418754	G	A	0	GGGGACAGGGGTGGGGTGGAGGGGG	GGGGACAGGGGTGGAGTGGAGGGGG	1	1
RAB33B	chr4	140374995	140375020	rs1017522889	140375015	C	T	0	GGGGCTGGGTCAGTCAGGGCGCTGGG	GGGGCTGGGTCAGTCAGGGCGTTGGG	0	0
GABRD	chr1	1954201	1954227	rs1017547796	1954224	G	C	0	GGGGTCCCGTGGGCGCGGGGTCCTGGG	GGGGTCCCGTGGGCGCGGGGTCCTCGG	0	0
WNK1	chr12	916280	916307	rs1017555345	916290	T	G	0	GGGGTGGGGGGTTGGTGTGGGGAGTGGG	GGGGTGGGGGGGTGGTGTGGGGAGTGGG	0	0
ADK	chr10	75946232	75946254	rs1017578821	75946251	G	T	0	GGGGGAGTGGGGTGGGGGTGGGG	GGGGGAGTGGGGTGGGGGTGTGG	0	0
FRAS1	chr4	79175995	79176016	rs1017650	79176014	G	G	0	GGGCCTGGGAATGAAGGGTGGG	GGGCCTGGGAATGAAGGGTGGG	0	0
MSH3	chr5	80089807	80089832	rs1017697366	80089818	G	T	0	GGGAATACGAGGGAACAGGGAAAGGG	GGGAATACGAGGTAACAGGGAAAGGG	1	1
SEC23B	chr20	18539725	18539751	rs1017763560	18539747	T	G	0	GGGGGGGGTGTCGGGGGCACTGGTGGG	GGGGGGGGTGTCGGGGGCACTGGGGGG	0	0
MICB	chr6	31466074	31466104	rs1017771128	31466098	T	G	0	GGGAGCGGCGGGGCGTTTCCGGGGGTCCGGG	GGGAGCGGCGGGGCGTTTCCGGGGGGCCGGG	0	0
WWOX	chr16	78311438	78311467	rs1017783691	78311443	G	A	0	GGGCAGGGGGTGGGGGAGGGCACAGTGGGG	GGGCAGAGGGTGGGGGAGGGCACAGTGGGG	0	0
COL6A2	chr21	47518598	47518627	rs1017787172	47518602	G	T	0	GGGCGGGACTGGGCGGGGAGGGGACGCGGG	GGGCGTGACTGGGCGGGGAGGGGACGCGGG	1	1
CRELD1	chr3	9982350	9982375	rs1017848384	9982363	A	G	0	GGGAGAGGGAGACCATGGGGAGAGGG	GGGAGAGGGAGACCGTGGGGAGAGGG	1	1
SETBP1	chr18	42321624	42321649	rs1017928624	42321648	G	T	0	GGGCTGGGTGGGAGGTGTGGGGTGGG	GGGCTGGGTGGGAGGTGTGGGGTGGT	0	0
HOXD4	chr2	177016975	177017003	rs1017939115	177016976	G	A	0	GGGCGCAAAAGGGGGTGGGGATGGGGGGG	GGACGCAAAAGGGGGTGGGGATGGGGGGG	0	0
TTC7A	chr2	47235201	47235223	rs10179930	47235209	G	T	0	GGGGTAGTAGGGACAGGGCCGGG	GGGGTAGTATGGACAGGGCCGGG	1	1
SLC5A5	chr19	17994104	17994127	rs1018016208	17994118	G	A	0	GGGGTGGGGGAATTGGGAAGGGGG	GGGGTGGGGGAATTGAGAAGGGGG	0	0
DAGLA	chr11	61477104	61477127	rs1018090188	61477113	G	A	0	GGGTGACAGAGGGAGGGGACGGGG	GGGTGACAGAAGGAGGGGACGGGG	1	1
MLPH	chr2	238421061	238421083	rs1018105859	238421081	G	T	0	GGGTGGTGGGGTGGGGATGGGGG	GGGTGGTGGGGTGGGGATGGGTG	0	0
COL9A3	chr20	61452116	61452146	rs1018132908	61452134	G	C	0	GGGCCAGACAGGGCCCAGAGGGTGTGGAGGG	GGGCCAGACAGGGCCCAGACGGTGTGGAGGG	1	1
PNKD	chr2	219195090	219195109	rs1018152066	219195103	G	C	0	GGGAGGGGCGTCTGGGGGGG	GGGAGGGGCGTCTGCGGGGG	0	0
BTD	chr3	15678284	15678312	rs1018170175	15678299	T	G	0	GGGGTGGGGGGGTGTTTGGGGGCAGGGGG	GGGGTGGGGGGGTGTTGGGGGGCAGGGGG	0	0
RNF213	chr17	78235278	78235303	rs1018171812	78235285	C	T	0	GGGCCGGGCCCTGGGGGAGTCCAGGG	GGGCCGGGTCCTGGGGGAGTCCAGGG	0	0
AMPD3	chr11	10416770	10416800	rs1018220552	10416777	G	C	0	GGGGGAGGGGGGAAGCGAGGGAGAGAGAGGG	GGGGGAGGCGGGAAGCGAGGGAGAGAGAGGG	0	0
ALDH2	chr12	112241786	112241817	rs1018224649	112241800	C	T	0	GGGACCTGCTGGGGGCTCAGGGCCTGTTGGGG	GGGACCTGCTGGGGGTTCAGGGCCTGTTGGGG	1	1
TGM6	chr20	2378049	2378070	rs1018277099	2378056	G	A	0	GGGATTCGGGTGCTGGGCAGGG	GGGATTCGAGTGCTGGGCAGGG	0	0
KCNK3	chr2	26934730	26934752	rs10183982	26934740	G	T	0	GGGGCTGGGGGGAGGGAGCAGGG	GGGGCTGGGGGTAGGGAGCAGGG	0	0
PIGL	chr17	16223766	16223789	rs1018432969	16223787	G	T	0	GGGAGGGAAGGAGGGAAGGAAGGG	GGGAGGGAAGGAGGGAAGGAAGTG	0	0
XPNPEP3	chr22	41347792	41347823	rs1018465832	41347819	T	G	0	GGGAAGGACAGGGTAGGGTGGGGTGGGGTGGG	GGGAAGGACAGGGTAGGGTGGGGTGGGGGGGG	1	1
SGCD	chr5	155949193	155949221	rs1018484967	155949210	G	A	0	GGGCCTGTCAGGGGGTGGGGGGCTGAGGG	GGGCCTGTCAGGGGGTGGAGGGCTGAGGG	0	0
CACNA1H	chr16	1248528	1248551	rs1018496382	1248532	T	C	0	GGGGCTCGGGGGTCCCGGGAGGGG	GGGGCCCGGGGGTCCCGGGAGGGG	0	0
IGF1R	chr15	99341390	99341412	rs1018577999	99341410	G	A	0	GGGAAGGGGATGGGAGGGCTGGG	GGGAAGGGGATGGGAGGGCTGAG	0	0
RAI1	chr17	17676373	17676387	rs1018599414	17676379	T	G	0	GGGTGGGTGGGTGGG	GGGTGGGGGGGTGGG	0	0
FGGY	chr1	60030711	60030738	rs1018623168	60030714	A	G	0	GGGTACAAGGGAATGGGGTGGGATGGGG	GGGTGCAAGGGAATGGGGTGGGATGGGG	0	0
DNM1L	chr12	32832753	32832783	rs1018653119	32832777	C	T	0	GGGCACCTGGGGGACGCGCGGGGCACTCGGG	GGGCACCTGGGGGACGCGCGGGGCATTCGGG	0	0
ACAD9	chr3	128621722	128621743	rs1018681279	128621725	T	C	0	GGGGTGGGGATGGGGATTGGGG	GGGGCGGGGATGGGGATTGGGG	0	0
SMOC2	chr6	169061455	169061479	rs1018738102	169061476	G	A	0	GGGGCAGGGAAGGGGCATGGATGGG	GGGGCAGGGAAGGGGCATGGATAGG	0	0
MYH14	chr19	50709666	50709695	rs1018744598	50709669	T	G	0	GGGGTGGGGTGGGGTGGGTGGGGGTGAGGG	GGGGGGGGGTGGGGTGGGTGGGGGTGAGGG	0	0
KCNQ1	chr11	2850841	2850860	rs1018772681	2850846	G	A	0	GGGAGTGGGGAGGGCAGGGG	GGGAGTAGGGAGGGCAGGGG	0	0
SLC4A4	chr4	72096805	72096831	rs1018842355	72096821	G	C	0	GGGGAGGGATGGGAGAAGGGAGGTGGG	GGGGAGGGATGGGAGAACGGAGGTGGG	0	0
NDUFAF6	chr8	96037464	96037486	rs1018903885	96037482	T	G	0	GGGAAGCGGGGTCCCGGGGTGGG	GGGAAGCGGGGTCCCGGGGGGGG	0	0
ITGB4	chr17	73739706	73739723	rs1018917287	73739713	C	T	0	GGGCTGGGCTGGGCAGGG	GGGCTGGGTTGGGCAGGG	0	0
GATA4	chr8	11567078	11567095	rs1018990666	11567082	G	C	0	GGGCAGCGGGGGGGGGGG	GGGCACCGGGGGGGGGGG	0	0
CFD	chr19	862274	862300	rs1019035175	862289	A	G	0	GGGTTAGGGTGGGAATAGGGGGCGGGG	GGGTTAGGGTGGGAATGGGGGGCGGGG	0	0
EPHB2	chr1	23057118	23057144	rs1019057391	23057143	G	A	0	GGGGGTTCAGGGATATCTGGGGGAGGG	GGGGGTTCAGGGATATCTGGGGGAGGA	0	0
MYO7A	chr11	76912894	76912914	rs1019095720	76912905	G	A	0	GGGGTGGGGCCGGGGGTGGGG	GGGGTGGGGCCGAGGGTGGGG	0	0
PSTPIP1	chr15	77320505	77320532	rs1019098149	77320515	G	A	0	GGGGACTCCAGGGGTGGAGGGAGGAGGG	GGGGACTCCAGAGGTGGAGGGAGGAGGG	1	1
ST3GAL3	chr1	44233347	44233363	rs1019125004	44233349	T	G	0	GGGTGGGGGGGTAGGGG	GGGGGGGGGGGTAGGGG	0	0
KCNQ1	chr11	2821759	2821782	rs1019132642	2821771	G	C	0	GGGCCCAGGGAGTGGGGGAAGGGG	GGGCCCAGGGAGTCGGGGAAGGGG	0	0
GPR98	chr5	90337304	90337325	rs1019153425	90337317	G	A	0	GGGGTGGGGAGCTAGGGGAGGG	GGGGTGGGGAGCTAAGGGAGGG	0	0
THRA	chr17	38218099	38218129	rs1019249699	38218124	T	C	0	GGGAACCGGCGGGGCCAGGGGGGTGCTGGGG	GGGAACCGGCGGGGCCAGGGGGGTGCCGGGG	1	1
SMOC2	chr6	168955154	168955180	rs1019288572	168955162	G	A	0	GGGCTCCTGGGCTCCTGGGCTCCTGGG	GGGCTCCTGAGCTCCTGGGCTCCTGGG	0	0
TRAF3	chr14	103263408	103263428	rs1019290944	103263417	G	A	0	GGGAGGGCAAGGGCCAGGGGG	GGGAGGGCAAAGGCCAGGGGG	0	0
SPATA7	chr14	88864824	88864845	rs1019388375	88864833	G	A	0	GGGGTGGGGGGAGGGGGGAGGG	GGGGTGGGGGAAGGGGGGAGGG	0	0
DPP6	chr7	154516459	154516488	rs1019475745	154516473	G	A	0	GGGGTGCCAGGGGCTGGGGGAGGGATGGGG	GGGGTGCCAGGGGCTAGGGGAGGGATGGGG	0	0
PLCB4	chr20	9366903	9366929	rs1019518753	9366920	G	T	0	GGGAGGGGGAGGGGGAGAGGGAGAGGG	GGGAGGGGGAGGGGGAGATGGAGAGGG	0	0
CHRNG	chr2	233405648	233405668	rs1019567458	233405665	G	A	0	GGGCTGGGCCACCTGGGTGGG	GGGCTGGGCCACCTGGGTAGG	0	0
C1QC	chr1	22972696	22972724	rs1019568014	22972718	C	T	0	GGGCTGACGTGGGCTGAATGGGGCTGGGG	GGGCTGACGTGGGCTGAATGGGGTTGGGG	0	0
PIK3CA	chr3	178866267	178866292	rs1019591513	178866271	A	G	0	GGGGGAGAGGGGCCGGGAGGCGGGGG	GGGGGGGAGGGGCCGGGAGGCGGGGG	0	0
TRIOBP	chr22	38137087	38137108	rs1019619425	38137088	G	A	0	GGGGATGGGAGGGAGGAGGGGG	GGAGATGGGAGGGAGGAGGGGG	0	0
LRP5	chr11	68131517	68131532	rs1019638230	68131524	T	G	0	GGGTGGGGTGGGGGGG	GGGTGGGGGGGGGGGG	0	0
ZBTB38	chr3	141045243	141045269	rs1019693857	141045267	G	A	0	GGGGGTTGCAGGGGAGCAGGGTGGGGG	GGGGGTTGCAGGGGAGCAGGGTGGGAG	0	0
SYNE2	chr14	64505559	64505584	rs1019719567	64505576	G	A	0	GGGAGAGGGAGACCGTGGGGAGAGGG	GGGAGAGGGAGACCGTGGAGAGAGGG	1	1
MCPH1	chr8	6269335	6269360	rs1019742421	6269343	T	A	0	GGGAGGGGTTGGGGGCGGGACGCGGG	GGGAGGGGTAGGGGGCGGGACGCGGG	0	0
TECR	chr19	14674116	14674135	rs1019821687	14674125	G	A	0	GGGACCTTAGGGTGGGAGGG	GGGACCTTAGAGTGGGAGGG	1	1
MYO7A	chr11	76912894	76912914	rs1019834898	76912913	G	T	0	GGGGTGGGGCCGGGGGTGGGG	GGGGTGGGGCCGGGGGTGGGT	0	0
TUSC3	chr8	15304245	15304270	rs1019988231	15304253	A	G	0	GGGGGAGGGAGGGGGGAGGGGGAGGG	GGGGGAGGGGGGGGGGAGGGGGAGGG	0	0
GNAS	chr20	57463849	57463864	rs1020019184	57463851	A	C	0	GGGAGGGCGGGGTGGG	GGGCGGGCGGGGTGGG	0	0
SH3BP2	chr4	2794972	2795002	rs1020041188	2794983	T	G	0	GGGTCTCGGGGGTCTCGGGGGAGTCTCGGGG	GGGTCTCGGGGGGCTCGGGGGAGTCTCGGGG	0	0
IFT122	chr3	129219918	129219942	rs1020050538	129219939	G	T	0	GGGAGAGGAGGGGGTTGGGGTGGGG	GGGAGAGGAGGGGGTTGGGGTGTGG	0	0
ARID1B	chr6	157343310	157343333	rs1020119547	157343326	A	G	0	GGGGCGGGGCCGGCGGGAGGTGGG	GGGGCGGGGCCGGCGGGGGGTGGG	0	0
BCMO1	chr16	81309522	81309545	rs1020129575	81309539	T	G	0	GGGTGTGGCTGGGAGGGGTGTGGG	GGGTGTGGCTGGGAGGGGGGTGGG	0	0
MITF	chr3	69948482	69948504	rs1020146282	69948503	G	T	0	GGGCAGGGGCCAGGGGCCTAGGG	GGGCAGGGGCCAGGGGCCTAGGT	0	0
TENM3	chr4	183311281	183311303	rs1020159848	183311294	G	A	0	GGGGATCCCGGGTGGGTCATGGG	GGGGATCCCGGGTGAGTCATGGG	0	0
GLIS2	chr16	4365649	4365673	rs1020226581	4365655	G	C	0	GGGCCGGGGGCGGGGCCGCGGGGGG	GGGCCGGCGGCGGGGCCGCGGGGGG	0	0
TTC7A	chr2	47221343	47221368	rs1020275872	47221358	G	A	0	GGGGCTCCTTGGGAGTGGGGTTGGGG	GGGGCTCCTTGGGAGTAGGGTTGGGG	0	0
HTRA1	chr10	124253041	124253061	rs1020300528	124253048	G	C	0	GGGGCAGGGGTGGGGACAGGG	GGGGCAGGCGTGGGGACAGGG	1	1
DLEC1	chr3	38141261	38141286	rs1020301742	38141276	T	G	0	GGGGGCGGGGTGGGGGTGGGGGCGGG	GGGGGCGGGGTGGGGGGGGGGGCGGG	0	0
KCNQ4	chr1	41284799	41284826	rs1020312613	41284808	T	G	0	GGGGTGAGGGTGGGGGTGGGAATGGGGG	GGGGTGAGGGGGGGGGTGGGAATGGGGG	0	0
ITGB3	chr17	45389760	45389783	rs1020327366	45389772	G	C	0	GGGATAAATAGGGGGCGGGGAGGG	GGGATAAATAGGGCGCGGGGAGGG	0	0
ATP8A2	chr13	26055292	26055317	rs1020388047	26055316	G	C	0	GGGAGAGGGAGACCGTGGGGAGAGGG	GGGAGAGGGAGACCGTGGGGAGAGGC	1	1
LAMA2	chr6	129706281	129706301	rs1020395125	129706296	G	A	0	GGGGAGGGAGGGGAGGGAGGG	GGGGAGGGAGGGGAGGAAGGG	0	0
MYPN	chr10	69944933	69944960	rs1020413385	69944951	A	G	0	GGGAAGGAGGGAAGGAGGGAAGGAAGGG	GGGAAGGAGGGAAGGAGGGGAGGAAGGG	0	0
CACNA1H	chr16	1227692	1227724	rs1020464386	1227710	G	A	0	GGGAAGGGCTGGGCAGGATGGGGCTCCACGGGG	GGGAAGGGCTGGGCAGGATAGGGCTCCACGGGG	0	0
CC2D1A	chr19	14040591	14040610	rs1020568551	14040600	C	A	0	GGGAGGGGCTCGGGGATGGG	GGGAGGGGCTAGGGGATGGG	0	0
COL18A1	chr21	46929918	46929945	rs1020618220	46929930	A	G	0	GGGGCCTGGGTGCAGGGGGCAGCGTGGG	GGGGCCTGGGTGCGGGGGGCAGCGTGGG	0	0
DPP6	chr7	154099684	154099705	rs1020651145	154099699	G	A	0	GGGTTGGGGGGAGGGGGGAGGG	GGGTTGGGGGGAGGGGAGAGGG	0	0
DNAJB6	chr7	157129990	157130017	rs1020672180	157129993	T	G	0	GGGGTTGCGGGGCGAAGGGTGGGCGGGG	GGGGGTGCGGGGCGAAGGGTGGGCGGGG	0	0
WWOX	chr16	78510354	78510375	rs1020738693	78510368	G	T	0	GGGGTGCGGGGAGGGGAGAGGG	GGGGTGCGGGGAGGGTAGAGGG	0	0
CHST3	chr10	73725253	73725283	rs1020740908	73725254	G	C	0	GGGTGTGGACGGGGTAAGGGGAGGTGGGGGG	GGCTGTGGACGGGGTAAGGGGAGGTGGGGGG	0	0
CAMTA1	chr1	7765018	7765047	rs1020811381	7765028	G	C	0	GGGCGCGCGCGGGGCGGGGGCGGGGCCGGG	GGGCGCGCGCGCGGCGGGGGCGGGGCCGGG	0	0
SEPT9	chr17	75323626	75323652	rs1020876386	75323645	G	A	0	GGGCAGTGGGGGCTGGGTATGGGAGGG	GGGCAGTGGGGGCTGGGTATAGGAGGG	0	0
MBNL1	chr3	152178254	152178275	rs1020952321	152178269	G	A	0	GGGGTCGGGGGAGGGGGGAGGG	GGGGTCGGGGGAGGGGAGAGGG	0	0
TTC7A	chr2	47206324	47206346	rs1021060581	47206329	G	A	0	GGGGAGGGTGGAGGGCATCTGGG	GGGGAGAGTGGAGGGCATCTGGG	0	0
TPO	chr2	1407331	1407357	rs1021062593	1407342	C	T	0	GGGTGGGGGACACTGGGGAACAATGGG	GGGTGGGGGACATTGGGGAACAATGGG	2	2
PLCE1	chr10	96017529	96017550	rs1021106292	96017543	G	A	0	GGGGTGGAGGGAGGAGGGAGGG	GGGGTGGAGGGAGGAAGGAGGG	0	0
SLC4A4	chr4	72260629	72260657	rs1021174894	72260636	G	A	0	GGGAACTTGAGGGGAAGTGTGGGAGGGGG	GGGAACTTAAGGGGAAGTGTGGGAGGGGG	1	1
SETBP1	chr18	42475153	42475183	rs1021181414	42475170	A	G	0	GGGAGGGGAGGGGAGGGGAGGGAAGAAAGGG	GGGAGGGGAGGGGAGGGGGGGGAAGAAAGGG	0	0
AQP1	chr7	30933058	30933080	rs1021189749	30933061	G	C	0	GGGAGGGAAGTGGGAGGGTAGGG	GGGACGGAAGTGGGAGGGTAGGG	0	0
MCPH1	chr8	6455958	6455984	rs1021196388	6455962	A	G	0	GGGAGAAGAAGGGGATGGGGTGGGGGG	GGGAGGAGAAGGGGATGGGGTGGGGGG	0	0
PALLD	chr4	169709849	169709877	rs1021226528	169709852	G	C	0	GGGGGATGCTGGGCATGGGTAGGGACGGG	GGGGCATGCTGGGCATGGGTAGGGACGGG	0	0
AMPD3	chr11	10467619	10467639	rs1021228208	10467623	T	G	0	GGGGGTGAGGGGTCGGGGGGG	GGGGGGGAGGGGTCGGGGGGG	0	0
DPP6	chr7	154666869	154666892	rs1021254895	154666877	G	C	0	GGGGAGGGAGGGAGGAAGGGAGGG	GGGGAGGGACGGAGGAAGGGAGGG	0	0
CHRM2	chr7	136635124	136635151	rs1021261204	136635128	G	T	0	GGGATGGGGGTGGGAGTGGGGATCAGGG	GGGATTGGGGTGGGAGTGGGGATCAGGG	0	0
LPIN1	chr2	11900803	11900828	rs1021270557	11900804	G	A	0	GGGACAGGGAGACGGTGGGGAGAGGG	GGAACAGGGAGACGGTGGGGAGAGGG	1	1
FLI1	chr11	128596244	128596273	rs1021287949	128596269	C	T	0	GGGGTGCAGGGGGCTGGGGGTGCAACCGGG	GGGGTGCAGGGGGCTGGGGGTGCAACTGGG	0	0
TECR	chr19	14647978	14648006	rs1021322041	14648004	G	A	0	GGGGCCGGGGGGGAAGGGGAGGCCGAGGG	GGGGCCGGGGGGGAAGGGGAGGCCGAGAG	0	0
BMP1	chr8	22052871	22052893	rs1021362672	22052880	G	A	0	GGGGAGCTGGGTGGGTCTTGGGG	GGGGAGCTGGATGGGTCTTGGGG	0	0
STIM1	chr11	4050800	4050821	rs1021442189	4050815	G	A	0	GGGTGGGCGGGGTGGGGGTGGG	GGGTGGGCGGGGTGGGAGTGGG	0	0
FIP1L1	chr4	54768114	54768132	rs1021453944	54768116	A	G	0	GGGAGGGAGGGAGGGAGGG	GGGGGGGAGGGAGGGAGGG	0	0
PLCE1	chr10	95839207	95839228	rs1021464902	95839225	G	T	0	GGGGTGGGGAGCGAGGGGAGGG	GGGGTGGGGAGCGAGGGGATGG	0	0
ERC1	chr12	1325763	1325787	rs1021488836	1325783	G	C	0	GGGGTCGGGGAGGAGGGATGGGGGG	GGGGTCGGGGAGGAGGGATGGCGGG	0	0
MYO15A	chr17	18012466	18012493	rs1021490535	18012479	A	T	0	GGGGCTCTGGGCCCAGGGTGAGGTAGGG	GGGGCTCTGGGCCCTGGGTGAGGTAGGG	0	0
NDUFS2	chr1	161167515	161167534	rs1021491003	161167523	T	A	0	GGGGTGGGGTGGGGAGAGGG	GGGGTGGGGAGGGGAGAGGG	0	0
HTRA1	chr10	124228023	124228043	rs1021522921	124228027	G	A	0	GGGATGAGGTGGGTGGGTGGG	GGGATAAGGTGGGTGGGTGGG	0	0
PEX26	chr22	18568075	18568096	rs1021634227	18568085	G	A	0	GGGCTGGGCCTGTGGGAGTGGG	GGGCTGGGCCTATGGGAGTGGG	0	0
RTEL1	chr20	62292914	62292934	rs1021638719	62292920	G	A	0	GGGTGGGGTGGGCCCATGGGG	GGGTGGGATGGGCCCATGGGG	0	0
PIGL	chr17	16223571	16223601	rs1021673492	16223587	A	G	0	GGGAGGAAGGGGAGGAGAGGGGAGGGGAGGG	GGGAGGAAGGGGAGGAGGGGGGAGGGGAGGG	0	0
SLC34A2	chr4	25666722	25666751	rs1021685296	25666749	G	A	0	GGGAGAGTTGGGGAGGTGGGCATTCATGGG	GGGAGAGTTGGGGAGGTGGGCATTCATGAG	0	0
FLNC	chr7	128485882	128485908	rs1021725785	128485903	A	G	0	GGGAGTTGGGGAGTGGGAGAGGAGGGG	GGGAGTTGGGGAGTGGGAGAGGGGGGG	0	0
TG	chr8	133949428	133949452	rs1021739925	133949450	G	A	0	GGGACTTGGGGGTTGGGAGAAGGGG	GGGACTTGGGGGTTGGGAGAAGGAG	1	1
CNTNAP2	chr7	147876668	147876697	rs1021768165	147876677	G	A	0	GGGGTGCGGGGGAGAGAGAGGGAGGGAGGG	GGGGTGCGGGAGAGAGAGAGGGAGGGAGGG	0	0
GATA4	chr8	11566454	11566478	rs1021848964	11566463	G	C	0	GGGCTGGGGCGCGTGAGGGCCGGGG	GGGCTGGGGCCCGTGAGGGCCGGGG	0	0
SFTPC	chr8	22021896	22021923	rs1021895527	22021911	G	T	0	GGGAGCTTGGGGAGAGGATGGGAGTGGG	GGGAGCTTGGGGAGAGTATGGGAGTGGG	0	0
PACRG	chr6	163500001	163500023	rs1022017554	163500022	G	A	0	GGGTACGCTGGGAGGGTGAGGGG	GGGTACGCTGGGAGGGTGAGGGA	0	0
PLG	chr6	161169475	161169501	rs1022026446	161169489	A	G	0	GGGAGGGAGGGAGGGAGGGAGGGAGGG	GGGAGGGAGGGAGGGGGGGAGGGAGGG	0	0
PRKCH	chr14	61941264	61941292	rs1022056446	61941272	A	C	0	GGGCCTGGCAGGGGATGGGGGGCTGGGGG	GGGCCTGGCCGGGGATGGGGGGCTGGGGG	0	0
BLK	chr8	11368803	11368824	rs1022056589	11368807	G	T	0	GGGGTGGGGAGAGCGGGGAGGG	GGGGTTGGGAGAGCGGGGAGGG	0	0
SMC3	chr10	112327853	112327875	rs1022068524	112327869	G	T	0	GGGCCGGCGGGCGGGCCGCTGGG	GGGCCGGCGGGCGGGCCTCTGGG	0	0
CNTN1	chr12	41310858	41310874	rs1022164557	41310873	G	A	0	GGGGGCGGGGGGGGGGG	GGGGGCGGGGGGGGGGA	0	0
LDLRAP1	chr1	25883390	25883409	rs1022164936	25883404	G	T	0	GGGATGGGAGGGAGAGGGGG	GGGATGGGAGGGAGATGGGG	0	0
TECR	chr19	14648055	14648083	rs1022196233	14648062	A	G	0	GGGCCTGGATGGGGGAGGCGGGACCAGGG	GGGCCTGGGTGGGGGAGGCGGGACCAGGG	1	1
MBNL1	chr3	151986634	151986657	rs1022204272	151986653	G	C	0	GGGGCTGGGCGGGCGGGGGAGGGG	GGGGCTGGGCGGGCGGGGGACGGG	0	0
DYSF	chr2	71803819	71803845	rs1022207885	71803826	G	A	0	GGGGAGCCGAGGGGGCCGGGAGTGGGG	GGGGAGCCAAGGGGGCCGGGAGTGGGG	0	0
CACNA1H	chr16	1205486	1205514	rs1022216650	1205511	G	A	0	GGGGAAGGGTCTGGAAGGGACTGCATGGG	GGGGAAGGGTCTGGAAGGGACTGCATAGG	1	1
PCSK9	chr1	55528870	55528890	rs1022222145	55528875	G	T	0	GGGTGGGAGGTGCGGGGTGGG	GGGTGGTAGGTGCGGGGTGGG	0	0
IFNGR2	chr21	34775649	34775675	rs1022250905	34775663	C	G	0	GGGGGCGGGACGGGGCGGGGGCGGGGG	GGGGGCGGGACGGGGGGGGGGCGGGGG	0	0
DNAJB6	chr7	157209507	157209534	rs1022253448	157209519	G	A	0	GGGTTAGGGCCATGCTGGGGAAAACGGG	GGGTTAGGGCCATACTGGGGAAAACGGG	0	0
VPS13B	chr8	100281018	100281038	rs1022272958	100281022	T	C	0	GGGATTTTGGGGGGGCCAGGG	GGGATCTTGGGGGGGCCAGGG	0	0
ATP8A2	chr13	26353523	26353552	rs1022275439	26353533	T	G	0	GGGAGTGGGGTTGGGGTGGGTGGGGCAGGG	GGGAGTGGGGTGGGGGTGGGTGGGGCAGGG	0	0
DTNA	chr18	32074299	32074326	rs1022282459	32074312	T	C	0	GGGTGGGAGTGGGCTCCGGGCCCCGGGG	GGGTGGGAGTGGGCCCCGGGCCCCGGGG	0	0
IRAK3	chr12	66628957	66628987	rs1022314057	66628976	G	A	0	GGGACTGGGAGGGGCCATGGGGTGGGCTGGG	GGGACTGGGAGGGGCCATGGAGTGGGCTGGG	1	1
ABHD5	chr3	43733108	43733137	rs1022315871	43733130	T	G	0	GGGAAGCGGCGGGAGGGCGGGGGTGCCGGG	GGGAAGCGGCGGGAGGGCGGGGGGGCCGGG	0	0
IGF1R	chr15	99221089	99221109	rs1022328882	99221105	T	G	0	GGGTTGGGCATGGGGGTTGGG	GGGTTGGGCATGGGGGTGGGG	0	0
MYH14	chr19	50774807	50774836	rs1022331422	50774830	G	A	0	GGGGGCCTGAGGGCAGCTGGGAAAGTGGGG	GGGGGCCTGAGGGCAGCTGGGAAAATGGGG	0	0
NDUFS7	chr19	1383962	1383987	rs1022392623	1383964	T	G	0	GGGTGTGGGGCCGCGCGGGTCTGGGG	GGGGGTGGGGCCGCGCGGGTCTGGGG	0	0
COL18A1	chr21	46903453	46903474	rs1022407365	46903458	G	A	0	GGGGCTGGGAGCCGGGTCTGGG	GGGGCTAGGAGCCGGGTCTGGG	0	0
SLCO1B3	chr12	21161606	21161630	rs1022496151	21161629	G	A	0	GGGGGGGTGGGGGACTAGGGGAGGG	GGGGGGGTGGGGGACTAGGGGAGGA	1	1
SPECC1L	chr22	24759880	24759907	rs1022496405	24759903	T	G	0	GGGCGGTGGGGGTGGGGGTGGGGGTGGG	GGGCGGTGGGGGTGGGGGTGGGGGGGGG	0	0
MAP2K1	chr15	66679484	66679501	rs1022507721	66679500	G	A	0	GGGCGGGTGGGGCGGGGG	GGGCGGGTGGGGCGGGGA	0	0
ZBTB16	chr11	113998760	113998779	rs1022527667	113998765	G	A	0	GGGAAGGGTATAGGGCTGGG	GGGAAGAGTATAGGGCTGGG	0	0
BCKDHA	chr19	41889633	41889662	rs1022545006	41889650	A	G	0	GGGCCAAGGGGGACATCCAGGGGGCAGGGG	GGGCCAAGGGGGACATCCGGGGGGCAGGGG	1	1
RBPJ	chr4	26271401	26271423	rs1022578529	26271415	G	T	0	GGGAAGGGAGTGAAGGGGGAGGG	GGGAAGGGAGTGAAGTGGGAGGG	0	0
LEPR	chr1	65991672	65991692	rs1022675106	65991688	T	G	0	GGGCGGCGGGGGTGGGGTGGG	GGGCGGCGGGGGTGGGGGGGG	0	0
TBXAS1	chr7	139597132	139597154	rs1022814962	139597134	G	A	0	GGGGTGGGGAGGGGGACCGGGGG	GGGATGGGGAGGGGGACCGGGGG	1	1
BUB1B	chr15	40471369	40471390	rs1022849390	40471381	G	A	0	GGGAGGGAAGGGTGGAACAGGG	GGGAGGGAAGGGTAGAACAGGG	1	1
TNNT3	chr11	1942303	1942326	rs1022877894	1942319	C	T	0	GGGGAGGGCCTGGGTGCCCGAGGG	GGGGAGGGCCTGGGTGCTCGAGGG	0	0
BMP1	chr8	22023094	22023125	rs1022913854	22023104	G	A	0	GGGCCAGGCGGGGAGGCGCGGGCGGGTTCGGG	GGGCCAGGCGGAGAGGCGCGGGCGGGTTCGGG	0	0
CLN8	chr8	1712290	1712315	rs1022958891	1712298	C	G	0	GGGGGAGCCCGGGTGAGGGGCCGGGG	GGGGGAGCCGGGGTGAGGGGCCGGGG	0	0
KCNQ1	chr11	2561738	2561766	rs1022968152	2561765	G	A	0	GGGATGACTGGGGTACCTGGGGCCAGGGG	GGGATGACTGGGGTACCTGGGGCCAGGGA	1	1
PHKB	chr16	47503512	47503541	rs1022990386	47503532	A	C	0	GGGAGAGTGAGGGAGAGGGGCAGGGCAGGG	GGGAGAGTGAGGGAGAGGGGCCGGGCAGGG	0	0
PABPN1	chr14	23791149	23791173	rs1023074375	23791157	T	G	0	GGGGCCGGGTCGGGCCGGGGATGGG	GGGGCCGGGGCGGGCCGGGGATGGG	0	0
SH2B3	chr12	111883052	111883077	rs1023078260	111883066	G	C	0	GGGGGAAGGGTGGGGGCCAGGCAGGG	GGGGGAAGGGTGGGGCCCAGGCAGGG	0	0
SLC30A8	chr8	117987274	117987295	rs1023085694	117987278	G	A	0	GGGGTGGGGGGAGGGGGGAGGG	GGGGTAGGGGGAGGGGGGAGGG	0	0
PALLD	chr4	169759597	169759627	rs1023125035	169759624	G	A	0	GGGGAGCGAGGGTCGGGGAGGGAGTGCGGGG	GGGGAGCGAGGGTCGGGGAGGGAGTGCGAGG	0	0
DSG4	chr18	28992334	28992359	rs1023127930	28992348	G	A	0	GGGTAGTAGGGAGGGGAAACAGTGGG	GGGTAGTAGGGAGGGAAAACAGTGGG	1	1
PLOD1	chr1	12026474	12026497	rs1023287818	12026482	G	A	0	GGGAGTTGGGGGTGGAGGGATGGG	GGGAGTTGGAGGTGGAGGGATGGG	0	0
CNTN1	chr12	41252781	41252799	rs1023405393	41252797	G	C	0	GGGTGGGGTTGGGGGAGGG	GGGTGGGGTTGGGGGAGCG	0	0
FBLN1	chr22	45923431	45923453	rs1023430208	45923450	G	A	0	GGGCGGGGCAGGGATGTTGAGGG	GGGCGGGGCAGGGATGTTGAAGG	0	0
EIF2B5	chr3	184098261	184098287	rs1023447001	184098273	A	G	0	GGGCGCCCGGGGGAGGCGCGGGCGGGG	GGGCGCCCGGGGGGGGCGCGGGCGGGG	0	0
NDUFAF6	chr8	95961828	95961853	rs1023475413	95961835	G	T	0	GGGTGGGAGAGAGGGGCTAGGCCGGG	GGGTGGGATAGAGGGGCTAGGCCGGG	0	0
PACRG	chr6	163476124	163476148	rs1023512652	163476147	G	A	0	GGGAGTGGGTTAAAGAGGGAACGGG	GGGAGTGGGTTAAAGAGGGAACGGA	0	0
CAMTA1	chr1	7438647	7438672	rs1023568246	7438666	G	A	0	GGGGCCGGGGGCAGGGAGGAGTGGGG	GGGGCCGGGGGCAGGGAGGAATGGGG	0	0
TIMP3	chr22	33233496	33233524	rs1023705794	33233521	G	A	0	GGGCTTGAGGGGAGACAGGGTACGGCGGG	GGGCTTGAGGGGAGACAGGGTACGGCAGG	1	1
F11	chr4	187188017	187188045	rs1023715897	187188029	A	G	0	GGGGCCGGCGGGGAAGGAGGGAGGAGGGG	GGGGCCGGCGGGGGAGGAGGGAGGAGGGG	0	0
PNPLA1	chr6	36255162	36255180	rs1024016353	36255168	C	T	0	GGGTGGGCTGAGGGGTGGG	GGGTGGGTTGAGGGGTGGG	0	0
BSG	chr19	575601	575630	rs1024200754	575604	T	G	0	GGGGTGGGTGGGGAGGAGGGCGGGTGGGGG	GGGGGGGGTGGGGAGGAGGGCGGGTGGGGG	0	0
TPCN2	chr11	68830477	68830499	rs1024211677	68830486	G	C	0	GGGCTCGCAGGGTTGGGAAGGGG	GGGCTCGCAGCGTTGGGAAGGGG	0	0
USB1	chr16	58047505	58047522	rs1024292189	58047512	T	G	0	GGGGTGGGTGGGTGGGGG	GGGGTGGGGGGGTGGGGG	0	0
ATXN10	chr22	46148441	46148462	rs1024382028	46148445	T	G	0	GGGGTTGGGGCTGGGGCTGGGG	GGGGTGGGGGCTGGGGCTGGGG	0	0
CD96	chr3	111376342	111376362	rs1024474127	111376346	G	C	0	GGGTGGGGTGGGGGTGGTGGG	GGGTGCGGTGGGGGTGGTGGG	0	0
LAMA2	chr6	129706251	129706279	rs1024522229	129706264	A	G	0	GGGAGGGAGGGAGGAGAGGGAAGGAAGGG	GGGAGGGAGGGAGGGGAGGGAAGGAAGGG	0	0
MXI1	chr10	111987055	111987078	rs1024733108	111987073	A	G	0	GGGAGGGGCGGGTGCGGGGAGGGG	GGGAGGGGCGGGTGCGGGGGGGGG	0	0
CACNA1H	chr16	1240757	1240778	rs1024738421	1240766	T	C	0	GGGTGGGTGCTGGGGGAAGGGG	GGGTGGGTGCCGGGGGAAGGGG	0	0
MSH6	chr2	48011034	48011060	rs1024756943	48011036	C	G	0	GGGCGGGGCGGGGGGCGGGGTGGCGGG	GGGGGGGGCGGGGGGCGGGGTGGCGGG	0	0
IFT122	chr3	129220572	129220595	rs1024801474	129220575	C	T	0	GGGACGTTGGGTGTGATGGGTGGG	GGGATGTTGGGTGTGATGGGTGGG	0	0
KRT86	chr12	52672813	52672838	rs1024823039	52672830	A	G	0	GGGGCTTGGGGTGGGGGGAGGAAGGG	GGGGCTTGGGGTGGGGGGGGGAAGGG	0	0
GAA	chr17	78092201	78092228	rs1024830739	78092214	T	G	0	GGGTTGAGAAGGGGTGAGGGGACCTGGG	GGGTTGAGAAGGGGGGAGGGGACCTGGG	1	1
PCNT	chr21	47843640	47843662	rs1024859718	47843643	A	G	0	GGGGAGGGGGAGGGGAAGAGGGG	GGGGGGGGGGAGGGGAAGAGGGG	0	0
HNF1A	chr12	121417752	121417777	rs1024910153	121417753	G	A	0	GGGGGTGGGGGATGGGGGTGTGGGGG	GGAGGTGGGGGATGGGGGTGTGGGGG	0	0
ARHGEF10	chr8	1786299	1786326	rs1024919114	1786314	G	A	0	GGGCTGGGATCCACCGGGGGTGCCGGGG	GGGCTGGGATCCACCGAGGGTGCCGGGG	0	0
CA4	chr17	58231599	58231627	rs1025000574	58231615	T	G	0	GGGGTGGGTGGGAGGGGTGGGGGGGAGGG	GGGGTGGGTGGGAGGGGGGGGGGGGAGGG	0	0
CA4	chr17	58238138	58238163	rs1025034991	58238149	T	G	0	GGGCAGGGAAGGTGGGAAGCCCTGGG	GGGCAGGGAAGGGGGGAAGCCCTGGG	0	0
ENO3	chr17	4853356	4853380	rs1025040595	4853372	A	G	0	GGGCCGGCGGGGCGGGGAGCAGGGG	GGGCCGGCGGGGCGGGGGGCAGGGG	0	0
GPR126	chr6	142668001	142668030	rs1025051327	142668016	T	G	0	GGGGCCTGTTGGGGGGTGGGGGGCTAGGGG	GGGGCCTGTTGGGGGGGGGGGGGCTAGGGG	0	0
SEPN1	chr1	26142377	26142407	rs1025078220	26142396	G	A	0	GGGTAGACAAGGGATGCCTGGGCTGACTGGG	GGGTAGACAAGGGATGCCTGAGCTGACTGGG	2	2
BLK	chr8	11417650	11417676	rs1025247490	11417668	T	G	0	GGGTGGGTGGGTGGGTGGGTGGGTGGG	GGGTGGGTGGGTGGGTGGGGGGGTGGG	0	0
MRPS22	chr3	138903751	138903771	rs1025322601	138903768	G	A	0	GGGGCCCCTGGGCAGGGAGGG	GGGGCCCCTGGGCAGGGAAGG	0	0
EMX2	chr10	119308576	119308602	rs1025340389	119308589	T	G	0	GGGGGGGCTGGGGGTGGCGGGGGAGGG	GGGGGGGCTGGGGGGGGCGGGGGAGGG	0	0
CAMTA1	chr1	7244286	7244310	rs1025352208	7244294	A	T	0	GGGAAGGGTAGTAGGGGCAGTGGGG	GGGAAGGGTTGTAGGGGCAGTGGGG	0	0
SH3BP2	chr4	2801758	2801782	rs1025361013	2801774	A	G	0	GGGCGGGGTCTGGGGAAAGGGTGGG	GGGCGGGGTCTGGGGAAGGGGTGGG	0	0
CD151	chr11	832894	832922	rs1025388159	832902	C	G	0	GGGGCGGGGCCGGGGCGGGGCGGGGCGGG	GGGGCGGGGGCGGGGCGGGGCGGGGCGGG	0	0
PRCD	chr17	74540436	74540459	rs1025397619	74540453	T	G	0	GGGAAGGAAGGGAAAGGGTGAGGG	GGGAAGGAAGGGAAAGGGGGAGGG	0	0
IDUA	chr4	993998	994020	rs1025439728	994007	A	T	0	GGGGTGTGGGAGGGGAAATGGGG	GGGGTGTGGGTGGGGAAATGGGG	0	0
ADSL	chr22	40742728	40742757	rs1025525286	40742748	A	G	0	GGGCTGAGGGGCTGGGCCGGGAGGGACGGG	GGGCTGAGGGGCTGGGCCGGGGGGGACGGG	0	0
SCNN1G	chr16	23194638	23194657	rs1025543568	23194652	C	G	0	GGGAGGGCAGGGCTGCGGGG	GGGAGGGCAGGGCTGGGGGG	0	0
ITPR1	chr3	4813871	4813893	rs1025567854	4813890	G	A	0	GGGGGTGGGTCACTGGGTCAGGG	GGGGGTGGGTCACTGGGTCAAGG	0	0
CA4	chr17	58245720	58245741	rs1025579213	58245731	T	G	0	GGGGGGGGCAGGTGGGGAAGGG	GGGGGGGGCAGGGGGGGAAGGG	0	0
ERC1	chr12	1324896	1324915	rs1025587127	1324903	G	T	0	GGGTAAGGGAAAGGGCAGGG	GGGTAAGGTAAAGGGCAGGG	0	0
CHAT	chr10	50854172	50854198	rs1025593047	50854182	G	A	0	GGGTGCTGTTGGGTGGGGGATTAAGGG	GGGTGCTGTTGAGTGGGGGATTAAGGG	0	0
GRM1	chr6	146383469	146383497	rs1025605035	146383476	T	A	0	GGGCCTGTTGGGGGGTAGGGGGCTAGGGG	GGGCCTGTAGGGGGGTAGGGGGCTAGGGG	0	0
FIP1L1	chr4	54999534	54999549	rs1025627781	54999543	G	A	0	GGGGAGGGAGGGAGGG	GGGGAGGGAGAGAGGG	0	0
MYO6	chr6	76459291	76459314	rs1025634936	76459300	T	C	0	GGGTGGGCCCTGGGCAGCAGTGGG	GGGTGGGCCCCGGGCAGCAGTGGG	0	0
XPNPEP3	chr22	41347792	41347823	rs1025645257	41347809	T	G	0	GGGAAGGACAGGGTAGGGTGGGGTGGGGTGGG	GGGAAGGACAGGGTAGGGGGGGGTGGGGTGGG	1	1
MOCOS	chr18	33839037	33839061	rs1025659656	33839055	A	G	0	GGGTGGGGGTGGGGGGTGCAGAGGG	GGGTGGGGGTGGGGGGTGCGGAGGG	0	0
CAMTA1	chr1	7496402	7496428	rs1025682362	7496424	G	A	0	GGGAGGGGGCCTGGGAGGGAAAAGGGG	GGGAGGGGGCCTGGGAGGGAAAAAGGG	0	0
AQP1	chr7	30955549	30955568	rs1025704084	30955566	G	C	0	GGGAGGGGCTGGGGGCTGGG	GGGAGGGGCTGGGGGCTGCG	0	0
CHAT	chr10	50823580	50823603	rs1025758229	50823587	G	C	0	GGGTAGGGGTGGTGTTGGGTGGGG	GGGTAGGGCTGGTGTTGGGTGGGG	0	0
PACRG	chr6	163662855	163662873	rs1025836267	163662871	G	A	0	GGGGGGGCACGGGCTGGGG	GGGGGGGCACGGGCTGGAG	0	0
TRIOBP	chr22	38144752	38144776	rs1025929880	38144758	T	C	0	GGGGCCATGGGAGGGCAGGACGGGG	GGGGCCACGGGAGGGCAGGACGGGG	0	0
ITGAM	chr16	31323457	31323478	rs1025994826	31323470	G	A	0	GGGGTGGGGGGAGGGGGGAGGG	GGGGTGGGGGGAGGAGGGAGGG	0	0
CACNA1D	chr3	53616482	53616509	rs1026008233	53616487	A	C	0	GGGGGTATAGGGAGCTGGGCAGGCAGGG	GGGGGTCTAGGGAGCTGGGCAGGCAGGG	0	0
AGPS	chr2	178260807	178260825	rs1026020886	178260811	T	G	0	GGGGGTGGGAGGGTGGGGG	GGGGGGGGGAGGGTGGGGG	0	0
SPECC1L	chr22	24812692	24812709	rs1026066902	24812698	G	T	0	GGGATGGGGGGGTAGGGG	GGGATGGTGGGGTAGGGG	0	0
CDKAL1	chr6	21158694	21158721	rs1026091359	21158710	G	A	0	GGGGGTGGGTTGGAGGGGACTCAAAGGG	GGGGGTGGGTTGGAGGGAACTCAAAGGG	1	1
TEAD1	chr11	12770397	12770427	rs1026173863	12770406	G	C	0	GGGGATCCAGGGGAGGCAGGGGGACTGGGGG	GGGGATCCAGCGGAGGCAGGGGGACTGGGGG	1	1
C10orf11	chr10	78286590	78286611	rs1026289853	78286599	G	A	0	GGGGTGGGGGGAGGGGGGAGGG	GGGGTGGGGGAAGGGGGGAGGG	0	0
CDH23	chr10	73462131	73462155	rs1026369557	73462139	G	A	0	GGGAACGGAGGGAGCTGGGGAGGGG	GGGAACGGAAGGAGCTGGGGAGGGG	0	0
EPB41	chr1	29214820	29214845	rs1026396317	29214825	C	T	0	GGGGAGCGGGAGGGGCTGGGGAGGGG	GGGGAGTGGGAGGGGCTGGGGAGGGG	0	0
FGFR3	chr4	1806987	1807013	rs1026427156	1806993	A	G	0	GGGCCTCAAGGGCTGGGCCAGGCTGGG	GGGCCTCGAGGGCTGGGCCAGGCTGGG	0	0
CACNA1C	chr12	2169366	2169387	rs1026456667	2169377	G	A	0	GGGATGGGGATGGGAAGCCGGG	GGGATGGGGATGAGAAGCCGGG	0	0
PEX3	chr6	143772275	143772299	rs1026497674	143772280	A	G	0	GGGGGCATTGGGAGAAGGGGGTGGG	GGGGGCGTTGGGAGAAGGGGGTGGG	0	0
TECR	chr19	14647978	14648006	rs1026509646	14647996	A	G	0	GGGGCCGGGGGGGAAGGGGAGGCCGAGGG	GGGGCCGGGGGGGAAGGGGGGGCCGAGGG	0	0
SMAD3	chr15	67390664	67390686	rs1026543730	67390675	G	A	0	GGGAGGGAGGGAGGGAGGGAGGG	GGGAGGGAGGGAAGGAGGGAGGG	0	0
CAMTA1	chr1	7121731	7121756	rs1026593744	7121742	T	G	0	GGGAGAGCAGGGTGGGTTTGGTGGGG	GGGAGAGCAGGGGGGGTTTGGTGGGG	0	0
SLC22A18	chr11	2930738	2930760	rs1026605373	2930755	A	G	0	GGGGCGGGTCAGGGGGGGAAGGG	GGGGCGGGTCAGGGGGGGGAGGG	0	0
CAMTA1	chr1	7215438	7215462	rs1026706520	7215446	T	G	0	GGGCACCGTTGGGGGGGGGATTGGG	GGGCACCGTGGGGGGGGGGATTGGG	0	0
TMEM5	chr12	64173591	64173616	rs1026733414	64173612	T	C	0	GGGGCGGGGCTGTACCGGGCGCTGGG	GGGGCGGGGCTGTACCGGGCGCCGGG	0	0
ESR1	chr6	152169464	152169485	rs1026763180	152169473	G	C	0	GGGGTCGGGGGAGGGGGGAGGG	GGGGTCGGGGCAGGGGGGAGGG	0	0
MSH3	chr5	79950797	79950819	rs1026822283	79950805	C	T	0	GGGACTGGGCAGGGCCATCGGGG	GGGACTGGGTAGGGCCATCGGGG	1	1
ADAT3	chr19	1905589	1905613	rs1026858904	1905595	C	G	0	GGGCGGGCCGGTGGGCGACGCGGGG	GGGCGGGGCGGTGGGCGACGCGGGG	0	0
LRP5	chr11	68118114	68118138	rs1026960870	68118128	G	C	0	GGGTAGTGGGAATGAGGGTGTGGGG	GGGTAGTGGGAATGACGGTGTGGGG	0	0
LPL	chr8	19793654	19793674	rs1026997510	19793660	G	T	0	GGGGTGGGGGGAGGGGGAGGG	GGGGTGGTGGGAGGGGGAGGG	0	0
MYC	chr8	128749919	128749945	rs1027036898	128749927	T	G	0	GGGCGGTACTGGGGGTGGGGACGGGGG	GGGCGGTACGGGGGGTGGGGACGGGGG	0	0
ADCK3	chr1	227164077	227164103	rs1027068683	227164101	G	A	0	GGGGCTGTGGGACTGCGGGGCTGTGGG	GGGGCTGTGGGACTGCGGGGCTGTGAG	1	1
ESRRB	chr14	76875951	76875970	rs1027130585	76875965	G	T	0	GGGGTGGGGGCGGGGGTGGG	GGGGTGGGGGCGGGGTTGGG	0	0
MAP2K1	chr15	66766408	66766434	rs1027157770	66766422	C	G	0	GGGTTTGTGGGCCCTCTGGGTCAGGGG	GGGTTTGTGGGCCCTGTGGGTCAGGGG	0	0
ARHGAP26	chr5	142498355	142498376	rs1027205208	142498370	G	A	0	GGGGTGGGGAGAGGGGGGAGGG	GGGGTGGGGAGAGGGGAGAGGG	0	0
PTS	chr11	112097338	112097368	rs1027228384	112097352	G	C	0	GGGCCCGGGAGGGGCGCGGGGGCTGCTGGGG	GGGCCCGGGAGGGGCCCGGGGGCTGCTGGGG	0	0
PIGL	chr17	16223603	16223624	rs1027246236	16223613	G	C	0	GGGAGGAAGGGGAAGGGAAGGG	GGGAGGAAGGGCAAGGGAAGGG	0	0
SEMA4A	chr1	156131005	156131029	rs1027295302	156131014	T	G	0	GGGGGCGGGGTGGGGACACGCGGGG	GGGGGCGGGGGGGGGACACGCGGGG	1	1
IYD	chr6	150693900	150693922	rs1027337901	150693921	G	A	0	GGGTGGGGTGGGGGTGGTGAGGG	GGGTGGGGTGGGGGTGGTGAGGA	0	0
KCNQ4	chr1	41250596	41250627	rs1027339515	41250614	T	A	0	GGGTGTGTGGGGGTCCCTGTGGGCCCCCTGGG	GGGTGTGTGGGGGTCCCTGAGGGCCCCCTGGG	0	0
SEPT9	chr17	75355132	75355154	rs1027560674	75355150	G	A	0	GGGAAGGGAAGAAGGGAGAGGGG	GGGAAGGGAAGAAGGGAGAAGGG	0	0
BMP1	chr8	22051813	22051843	rs1027562003	22051828	G	C	0	GGGATTGCCTGGGACTGGGGGTTTGGTGGGG	GGGATTGCCTGGGACTCGGGGTTTGGTGGGG	1	1
WFS1	chr4	6286360	6286386	rs1027610791	6286367	C	G	0	GGGGTCTCCTGGGGAAGTGGGGGAGGG	GGGGTCTCGTGGGGAAGTGGGGGAGGG	0	0
CAMTA1	chr1	7043784	7043802	rs1027681715	7043792	G	A	0	GGGTAGGGGGATGGGTGGG	GGGTAGGGGAATGGGTGGG	0	0
POLD1	chr19	50887774	50887798	rs1027722666	50887796	G	C	0	GGGCAGGGGCCAGGGGTTTCCTGGG	GGGCAGGGGCCAGGGGTTTCCTGCG	0	0
SMAD3	chr15	67437320	67437351	rs1027738146	67437329	G	T	0	GGGAGGGGTTGGGGGTAGGGGGTTGCCATGGG	GGGAGGGGTTTGGGGTAGGGGGTTGCCATGGG	0	0
PCSK9	chr1	55529661	55529687	rs1027742048	55529668	G	A	0	GGGGAGGGGGCGGTAGGGGCTGCAGGG	GGGGAGGGAGCGGTAGGGGCTGCAGGG	0	0
PACRG	chr6	163488387	163488405	rs1027766326	163488404	G	A	0	GGGACATGGGTGGGAGGGG	GGGACATGGGTGGGAGGGA	1	1
FRAS1	chr4	79175995	79176016	rs1027776622	79176006	G	A	0	GGGCCTGGGAATGAAGGGTGGG	GGGCCTGGGAATAAAGGGTGGG	0	0
CAMTA1	chr1	7247184	7247211	rs1027953737	7247203	T	G	0	GGGGCACAGGGCAGGGTGGGTGCGGGGG	GGGGCACAGGGCAGGGTGGGGGCGGGGG	0	0
AIRE	chr21	45710220	45710239	rs1028007128	45710238	G	C	0	GGGCCCGTGGGTGGGCCGGG	GGGCCCGTGGGTGGGCCGGC	0	0
HNF1A	chr12	121416386	121416410	rs1028023355	121416403	T	G	0	GGGCCGCTGGGGCCAGGGTTGGGGG	GGGCCGCTGGGGCCAGGGGTGGGGG	0	0
PAX2	chr10	102504806	102504828	rs1028096712	102504818	G	A	0	GGGTGGTGGGGTTGGGGCTAGGG	GGGTGGTGGGGTTAGGGCTAGGG	0	0
TEAD1	chr11	12833393	12833418	rs1028102804	12833404	G	T	0	GGGTGGGGGTGGGGGTGGGGGTAGGG	GGGTGGGGGTGGTGGTGGGGGTAGGG	0	0
SCNN1B	chr16	23344430	23344456	rs1028113850	23344433	G	A	0	GGGAGGGAGGGAGGGAGGGAGGGAGGG	GGGAAGGAGGGAGGGAGGGAGGGAGGG	0	0
PDE6B	chr4	620256	620286	rs1028134403	620260	C	T	0	GGGGGCTTCAGGGCTCTCTGGGCTGGGAGGG	GGGGGTTTCAGGGCTCTCTGGGCTGGGAGGG	0	0
MRPS22	chr3	138979492	138979520	rs1028139403	138979513	G	C	0	GGGGTAGGCAGGGAGGGAGGGAGGGAGGG	GGGGTAGGCAGGGAGGGAGGGACGGAGGG	0	0
CTDP1	chr18	77454621	77454645	rs1028196508	77454623	G	A	0	GGGGTGGGAGTGTGGGGGCTGAGGG	GGGATGGGAGTGTGGGGGCTGAGGG	0	0
GNAL	chr18	11802772	11802797	rs1028246638	11802787	G	A	0	GGGGTAGGGACTGCCGGGTGGCAGGG	GGGGTAGGGACTGCCGAGTGGCAGGG	1	1
MEF2A	chr15	100050093	100050112	rs1028269082	100050102	G	T	0	GGGGGTGGGAGGGTGGTGGG	GGGGGTGGGATGGTGGTGGG	0	0
LHX4	chr1	180200435	180200466	rs1028323413	180200440	C	T	0	GGGTGGCTCGGGTTTGGAGGGGTAGAGACGGG	GGGTGGTTCGGGTTTGGAGGGGTAGAGACGGG	0	0
DNAI2	chr17	72305907	72305933	rs1028364954	72305909	T	G	0	GGGTGGGGGCATTGGGGAACCACAGGG	GGGGGGGGGCATTGGGGAACCACAGGG	1	1
SYNGAP1	chr6	33388689	33388716	rs1028380787	33388702	A	G	0	GGGAACGGTGGGGGAGGGGAGACCAGGG	GGGAACGGTGGGGGGGGGGAGACCAGGG	1	1
NEXN	chr1	78403505	78403523	rs1028413155	78403521	G	A	0	GGGTTGGGGATTGGGAGGG	GGGTTGGGGATTGGGAGAG	0	0
ITPA	chr20	3189904	3189922	rs1028437934	3189918	T	G	0	GGGGCGGGGTGGGGGTGGG	GGGGCGGGGTGGGGGGGGG	0	0
PCNT	chr21	47810350	47810376	rs1028486318	47810351	G	T	0	GGGAGAGGGGCCCAGGGCTGAACTGGG	GGTAGAGGGGCCCAGGGCTGAACTGGG	1	1
FOXG1	chr14	29235694	29235722	rs1028499429	29235706	T	G	0	GGGGTGGAGGGGGTGGCGGGGGCGCAGGG	GGGGTGGAGGGGGGGGCGGGGGCGCAGGG	0	0
SPAST	chr2	32290884	32290906	rs1028513742	32290900	A	G	0	GGGGCCTGGGAGTGGGAAGTGGG	GGGGCCTGGGAGTGGGAGGTGGG	0	0
OTOGL	chr12	80611082	80611102	rs1028592794	80611084	A	G	0	GGGAAGGGGAGGGAGGATGGG	GGGGAGGGGAGGGAGGATGGG	0	0
STK11	chr19	1205658	1205678	rs1028634841	1205668	A	C	0	GGGGCGGGCAGAGGGCCGGGG	GGGGCGGGCAGCGGGCCGGGG	0	0
AQP1	chr7	30933058	30933080	rs1028646052	30933060	A	G	0	GGGAGGGAAGTGGGAGGGTAGGG	GGGGGGGAAGTGGGAGGGTAGGG	0	0
MYH14	chr19	50755246	50755264	rs1028655558	50755252	G	A	0	GGGTGAAGGGTGGGAAGGG	GGGTGAAAGGTGGGAAGGG	0	0
CAMTA1	chr1	7205908	7205933	rs1028670421	7205927	A	G	0	GGGCTGAGGGGATCTTGGGTACGGGG	GGGCTGAGGGGATCTTGGGTGCGGGG	0	0
CDH23	chr10	73416672	73416699	rs1028677636	73416695	A	G	0	GGGGGGTAGGGGATGGAGGGGACCAGGG	GGGGGGTAGGGGATGGAGGGGACCGGGG	1	1
PRPF31	chr19	54626955	54626984	rs1028678482	54626981	G	T	0	GGGAGGCGCCGGGCCCTAATGGGATTGGGG	GGGAGGCGCCGGGCCCTAATGGGATTGTGG	0	0
TMC8	chr17	76128070	76128093	rs1028681750	76128085	G	A	0	GGGGCCTTGGGCTCTGGGAGGGGG	GGGGCCTTGGGCTCTGAGAGGGGG	0	0
EIF2B5	chr3	184210347	184210371	rs1028774008	184210360	G	A	0	GGGAGCGGGAGAGAGGGACAGGGGG	GGGAGCGGGAGAGAAGGACAGGGGG	1	1
CHD7	chr8	61756345	61756371	rs1028778882	61756349	A	G	0	GGGTAAGAGGGAGTGCTGGGGTTTGGG	GGGTAGGAGGGAGTGCTGGGGTTTGGG	0	0
SLC24A4	chr14	92835045	92835069	rs1028793994	92835064	G	A	0	GGGGCTCTGAGGGTGGGGCAGGGGG	GGGGCTCTGAGGGTGGGGCAAGGGG	0	0
LARP7	chr4	113565431	113565453	rs1028829111	113565434	T	G	0	GGGGTGGGGCGGGGGCGGGGGGG	GGGGGGGGGCGGGGGCGGGGGGG	0	0
GHR	chr5	42512458	42512480	rs1028879267	42512459	G	C	0	GGGGCTGGGGGTGGGGCACAGGG	GGCGCTGGGGGTGGGGCACAGGG	0	0
CC2D1A	chr19	14040769	14040790	rs1028925721	14040786	T	G	0	GGGGGAGGGGCTCGGGGATGGG	GGGGGAGGGGCTCGGGGAGGGG	0	0
SCN8A	chr12	52077774	52077792	rs1028966210	52077785	G	A	0	GGGCAGGGCAGAGGGAGGG	GGGCAGGGCAGAAGGAGGG	0	0
NAT8L	chr4	2069408	2069436	rs1028997418	2069419	G	A	0	GGGCAGGGGGCTGTGTGGGCCCTCGTGGG	GGGCAGGGGGCTATGTGGGCCCTCGTGGG	0	0
MED25	chr19	50340044	50340073	rs1029036699	50340046	C	G	0	GGGCCCTCCTGGGCCCAAGGGCCTACTGGG	GGGGCCTCCTGGGCCCAAGGGCCTACTGGG	0	0
IL10RB	chr21	34638824	34638852	rs1029266382	34638843	G	A	0	GGGGTCCGCGGGGAGGGGGCGCGCTTGGG	GGGGTCCGCGGGGAGGGGGCACGCTTGGG	0	0
CAMTA1	chr1	7009262	7009288	rs1029294126	7009278	G	A	0	GGGGGAAGTGGGGTTAGGGCAGGAGGG	GGGGGAAGTGGGGTTAGAGCAGGAGGG	0	0
CACNA1C	chr12	2691912	2691935	rs1029311187	2691923	G	A	0	GGGGCAGGGCAGGGTGGTTTTGGG	GGGGCAGGGCAGAGTGGTTTTGGG	0	0
AGK	chr7	141251297	141251318	rs1029325111	141251302	G	C	0	GGGGTGGGAGTCGGGATGGGGG	GGGGTGCGAGTCGGGATGGGGG	0	0
ADAMTSL4	chr1	150524857	150524885	rs1029361905	150524872	G	A	0	GGGAAAGGGGACCACTGGGAGGGGCAGGG	GGGAAAGGGGACCACTAGGAGGGGCAGGG	1	1
CSF2RB	chr22	37331848	37331873	rs1029388407	37331857	A	G	0	GGGCTTTGGGAGCTTTGGGAGTGGGG	GGGCTTTGGGGGCTTTGGGAGTGGGG	0	0
CHMP4B	chr20	32441543	32441566	rs1029490263	32441558	G	T	0	GGGAGATGGGCGGGGGGAGGGGGG	GGGAGATGGGCGGGGGTAGGGGGG	0	0
LDLRAP1	chr1	25882798	25882824	rs1029519450	25882820	C	G	0	GGGAGGGTGGGAGGCCGAGGGCTCGGG	GGGAGGGTGGGAGGCCGAGGGCTGGGG	0	0
CACNA1H	chr16	1224513	1224528	rs1029618766	1224517	G	A	0	GGGGAGGGAGGGAGGG	GGGGAAGGAGGGAGGG	0	0
NOS1AP	chr1	162115045	162115060	rs1029701198	162115052	T	G	0	GGGGTGGGTGGGGGGG	GGGGTGGGGGGGGGGG	0	0
DYSF	chr2	71880791	71880812	rs1029726766	71880805	G	A	0	GGGGTGGGGGGAGGGGGGAGGG	GGGGTGGGGGGAGGGAGGAGGG	0	0
EGFR	chr7	55288998	55289018	rs1029729765	55289006	A	G	0	GGGAGAGGGAGAGGGAGAGGG	GGGAGAGGGGGAGGGAGAGGG	0	0
DPP10	chr2	115767005	115767027	rs1029740844	115767025	G	C	0	GGGGTGGGGGTTGGTGGGGAGGG	GGGGTGGGGGTTGGTGGGGAGCG	0	0
NPSR1	chr7	34723292	34723316	rs1029813137	34723294	T	C	0	GGGTGAGAGAGGGACAAGGGAGGGG	GGGCGAGAGAGGGACAAGGGAGGGG	1	1
ATL1	chr14	51009004	51009029	rs1029814808	51009007	G	A	0	GGGGGGAGGGGGTTGGGGGCAAGGGG	GGGGAGAGGGGGTTGGGGGCAAGGGG	0	0
GRK1	chr13	114436255	114436281	rs1029844322	114436267	C	T	0	GGGCCAGAGGGCTCTGGGTGCAATGGG	GGGCCAGAGGGCTTTGGGTGCAATGGG	0	0
EIF2B5	chr3	183977627	183977653	rs1029866895	183977640	C	G	0	GGGAGGGGGCGGGCCGGGGGCTGGGGG	GGGAGGGGGCGGGCGGGGGGCTGGGGG	0	0
DPP6	chr7	154562451	154562476	rs1029883158	154562457	A	G	0	GGGAGGGAATATTGGGGGGAACAGGG	GGGAGGGGATATTGGGGGGAACAGGG	1	1
UNG	chr12	109535631	109535656	rs1029919102	109535655	G	C	0	GGGCCGGGGCTAGGGGGTGAAGGGGG	GGGCCGGGGCTAGGGGGTGAAGGGGC	0	0
COL9A3	chr20	61460178	61460207	rs1029935164	61460196	G	A	0	GGGGCTCAGGGTGTGACGGGAGGGAGGGGG	GGGGCTCAGGGTGTGACGGAAGGGAGGGGG	0	0
SLC35C1	chr11	45832193	45832219	rs1029946709	45832210	C	T	0	GGGAGGCCTGGGGAGGAACGGGGAGGG	GGGAGGCCTGGGGAGGAATGGGGAGGG	0	0
GATA3	chr10	8096475	8096496	rs1029968560	8096478	C	G	0	GGGGCGGGAGGAGGGGCGGGGG	GGGGGGGGAGGAGGGGCGGGGG	0	0
CTDP1	chr18	77477192	77477220	rs1029971078	77477218	G	T	0	GGGTGTAGCCGGGTGGGGGCCCTGGTGGG	GGGTGTAGCCGGGTGGGGGCCCTGGTGTG	0	0
IFT43	chr14	76392372	76392399	rs1030094455	76392386	G	T	0	GGGAGACCGGGGAAAGAGAGGGAGAGGG	GGGAGACCGGGGAAATAGAGGGAGAGGG	1	1
EPHB2	chr1	23102436	23102454	rs1030168979	23102443	G	A	0	GGGTGGGAGGGCCTAAGGG	GGGTGGGAAGGCCTAAGGG	0	0
RIMS1	chr6	72799724	72799745	rs1030183650	72799729	G	C	0	GGGGTGGGGGGAGGGGGGAGGG	GGGGTGCGGGGAGGGGGGAGGG	0	0
TPCN2	chr11	68825832	68825857	rs1030184400	68825834	C	T	0	GGGCAGGGGACGGGGGAGAGATGGGG	GGGTAGGGGACGGGGGAGAGATGGGG	0	0
C10orf11	chr10	77865164	77865187	rs1030215144	77865175	G	A	0	GGGCTTATTTGGGGGGTGGGGGGG	GGGCTTATTTGGAGGGTGGGGGGG	0	0
GPHN	chr14	67013517	67013543	rs1030305313	67013521	A	G	0	GGGGGAGGGGGAGGGGGAGGGAGAGGG	GGGGGGGGGGGAGGGGGAGGGAGAGGG	0	0
UPB1	chr22	24921172	24921195	rs1030374775	24921192	G	A	0	GGGAAAGGAGGGAGGGAGGGAGGG	GGGAAAGGAGGGAGGGAGGGAAGG	0	0
KRT18	chr12	53342752	53342774	rs1030479293	53342762	T	G	0	GGGCGCGGGGGTGGGGCCCGGGG	GGGCGCGGGGGGGGGGCCCGGGG	0	0
DLEC1	chr3	38156609	38156627	rs1030484394	38156614	G	A	0	GGGAGGGAAGGTGGGAGGG	GGGAGGAAAGGTGGGAGGG	0	0
SETBP1	chr18	42475153	42475183	rs1030491831	42475155	A	G	0	GGGAGGGGAGGGGAGGGGAGGGAAGAAAGGG	GGGGGGGGAGGGGAGGGGAGGGAAGAAAGGG	0	0
CARD14	chr17	78167711	78167738	rs1030607459	78167730	G	T	0	GGGGTGGATTGGGTCAGGGAGGGAAGGG	GGGGTGGATTGGGTCAGGGATGGAAGGG	0	0
MSH2	chr2	47758710	47758733	rs1030629559	47758717	G	A	0	GGGCCACTGGGCAGGGTGAGGGGG	GGGCCACTAGGCAGGGTGAGGGGG	0	0
SCNN1B	chr16	23359776	23359797	rs1030637621	23359778	A	G	0	GGGAGGGAGGGAGGGGGGAGGG	GGGGGGGAGGGAGGGGGGAGGG	0	0
CNGA3	chr2	99007745	99007768	rs1030680807	99007753	G	A	0	GGGCTCTGGGGAGGCAGGGCTGGG	GGGCTCTGGAGAGGCAGGGCTGGG	0	0
BCR	chr22	23604873	23604900	rs1030683884	23604875	A	T	0	GGGAATGGCGGGCCCGGGTGAGGGCGGG	GGGTATGGCGGGCCCGGGTGAGGGCGGG	0	0
PAX2	chr10	102547508	102547532	rs1030759207	102547510	G	T	0	GGGGTTGGGTGGGGGGCACCCAGGG	GGGTTTGGGTGGGGGGCACCCAGGG	0	0
MSH6	chr2	48010960	48010986	rs1030793134	48010982	T	G	0	GGGTGGGGAGGGGGCCTGGGAGGTGGG	GGGTGGGGAGGGGGCCTGGGAGGGGGG	0	0
BCR	chr22	23632669	23632691	rs1030860220	23632682	G	T	0	GGGCAGGGTGTGGGGAAACAGGG	GGGCAGGGTGTGGGTAAACAGGG	1	1
GPHN	chr14	66985544	66985572	rs1030930369	66985557	G	A	0	GGGAAGAGGCGGGGGAAGGGGATACAGGG	GGGAAGAGGCGGGGAAAGGGGATACAGGG	0	0
COL6A1	chr21	47410462	47410494	rs1030962910	47410492	G	T	0	GGGGAAGGACGGGGAGGGACGGGGAGGGATGGG	GGGGAAGGACGGGGAGGGACGGGGAGGGATGTG	0	0
PDP1	chr8	94929491	94929523	rs1031026729	94929507	T	G	0	GGGGGCCGTCGGGGGGCTGGGGGCGGGGGCGGG	GGGGGCCGTCGGGGGGCGGGGGGCGGGGGCGGG	0	0
FGFR3	chr4	1803000	1803024	rs1031066643	1803017	C	T	0	GGGGATGGGCAGGGGCAGCTCTGGG	GGGGATGGGCAGGGGCAGTTCTGGG	0	0
CA4	chr17	58231599	58231627	rs1031127199	58231602	T	G	0	GGGGTGGGTGGGAGGGGTGGGGGGGAGGG	GGGGGGGGTGGGAGGGGTGGGGGGGAGGG	0	0
PCSK9	chr1	55521921	55521943	rs1031163713	55521927	C	G	0	GGGAGGGCGGGCGGGCAGGCGGG	GGGAGGGGGGGCGGGCAGGCGGG	0	0
PNPLA3	chr22	44320034	44320064	rs1031165259	44320057	C	T	0	GGGGAGCGGGGGATCCCCAGGGGTCGCGGGG	GGGGAGCGGGGGATCCCCAGGGGTTGCGGGG	0	0
CLN8	chr8	1712063	1712084	rs1031167052	1712071	G	A	0	GGGAGCCCGGGTGAGGGCCGGG	GGGAGCCCGAGTGAGGGCCGGG	0	0
STEAP3	chr2	119982857	119982877	rs1031178153	119982867	C	T	0	GGGTAAGTGGGCGGGGTGGGG	GGGTAAGTGGGTGGGGTGGGG	0	0
CACNA1C	chr12	2376611	2376636	rs1031283796	2376617	G	A	0	GGGAAAAGGGTGTGGGCAGGACTGGG	GGGAAAAAGGTGTGGGCAGGACTGGG	1	1
FAH	chr15	80445292	80445318	rs1031291810	80445315	G	A	0	GGGGGCGGGCAGGGGGGCGGGGCCGGG	GGGGGCGGGCAGGGGGGCGGGGCCAGG	0	0
AP4E1	chr15	51255754	51255774	rs1031303272	51255765	G	T	0	GGGAAGGGTCGGGGGGCAGGG	GGGAAGGGTCGGTGGGCAGGG	0	0
GPR56	chr16	57681264	57681293	rs1031424948	57681280	G	A	0	GGGGCCGTACGGGAAGAGGGGGAAACAGGG	GGGGCCGTACGGGAAGAAGGGGAAACAGGG	1	1
ST3GAL3	chr1	44367468	44367493	rs1031501426	44367481	G	T	0	GGGTGGGTGGGGGTGAGTGGGAAGGG	GGGTGGGTGGGGGTTAGTGGGAAGGG	0	0
TENM3	chr4	183695675	183695695	rs1031541721	183695687	G	A	0	GGGATTGGGTGCAGGGGAGGG	GGGATTGGGTGCAAGGGAGGG	0	0
ARHGAP26	chr5	142219462	142219485	rs1031607370	142219470	A	G	0	GGGGAGGGGAGGGGAGGGGAGGGG	GGGGAGGGGGGGGGAGGGGAGGGG	0	0
CPS1	chr2	211376107	211376128	rs1031612792	211376117	A	G	0	GGGGTGGGGGTAGCGGGTAGGG	GGGGTGGGGGTGGCGGGTAGGG	0	0
RET	chr10	43576404	43576425	rs1031634841	43576405	G	A	0	GGGTGCAGGGATGGGGTTTGGG	GGATGCAGGGATGGGGTTTGGG	0	0
ALG1	chr16	5089626	5089650	rs1031641249	5089636	T	G	0	GGGAACTCGGGTGGGGAAGAATGGG	GGGAACTCGGGGGGGGAAGAATGGG	1	1
MXI1	chr10	111987055	111987078	rs1031641320	111987066	T	G	0	GGGAGGGGCGGGTGCGGGGAGGGG	GGGAGGGGCGGGGGCGGGGAGGGG	0	0
IRF5	chr7	128579087	128579115	rs1031671957	128579094	T	G	0	GGGAGGGGTGGGGGCGGAGGGGAGGGGGG	GGGAGGGGGGGGGGCGGAGGGGAGGGGGG	0	0
AIRE	chr21	45716689	45716716	rs1031683173	45716695	T	G	0	GGGAGGGTGGGGCGTGGGAGTGGGGGGG	GGGAGGGGGGGGCGTGGGAGTGGGGGGG	0	0
FGGY	chr1	59843451	59843471	rs1031726785	59843463	G	T	0	GGGAGGGCACAGGGTGGTGGG	GGGAGGGCACAGGTTGGTGGG	0	0
GPHN	chr14	67232330	67232350	rs1031747508	67232339	T	G	0	GGGTAGAGGGTGGGAGGAGGG	GGGTAGAGGGGGGGAGGAGGG	0	0
PKP1	chr1	201277858	201277876	rs1031827245	201277860	T	G	0	GGGTGGGGCTGGGCTGGGG	GGGGGGGGCTGGGCTGGGG	0	0
AP4S1	chr14	31495492	31495512	rs1031842308	31495506	A	G	0	GGGAGAGGGGCGGGGAAGGGG	GGGAGAGGGGCGGGGGAGGGG	0	0
RAD51B	chr14	69073843	69073868	rs1031898123	69073853	G	A	0	GGGTCATGCGGGCGGGCCACTGAGGG	GGGTCATGCGGACGGGCCACTGAGGG	0	0
CAMTA1	chr1	7493810	7493828	rs1031933506	7493811	G	C	0	GGGCTGGGAGGGAAGTGGG	GGCCTGGGAGGGAAGTGGG	0	0
CACNA1C	chr12	2375420	2375441	rs1031993971	2375435	A	C	0	GGGCCGGGCGGGCAGTACTGGG	GGGCCGGGCGGGCAGTCCTGGG	0	0
HEATR2	chr7	817196	817221	rs1032056941	817219	G	A	0	GGGAGAAAGGGGATGGGGTGGGCGGG	GGGAGAAAGGGGATGGGGTGGGCGAG	0	0
GOSR2	chr17	45049365	45049393	rs1032102381	45049366	G	T	0	GGGCACAGGGCACGTGGGGGAGAGGGGGG	GGTCACAGGGCACGTGGGGGAGAGGGGGG	0	0
MSH2	chr2	47636236	47636259	rs1032125936	47636245	A	G	0	GGGGAGGGAAAGGGGAGGGGAGGG	GGGGAGGGAAGGGGGAGGGGAGGG	0	0
GRHL2	chr8	102619866	102619891	rs1032132447	102619870	G	A	0	GGGCTGGGGGGCACTCCTGGGAGGGG	GGGCTAGGGGGCACTCCTGGGAGGGG	0	0
DOK7	chr4	3465285	3465314	rs1032186758	3465305	G	A	0	GGGGCGGGCGGGGGACGGGGGGCGCGGGGG	GGGGCGGGCGGGGGACGGGGGACGCGGGGG	0	0
ATCAY	chr19	3885602	3885624	rs1032251683	3885612	A	G	0	GGGGGAGGGGAAGGGGGAGGGGG	GGGGGAGGGGAGGGGGGAGGGGG	0	0
GLRX5	chr14	96010166	96010190	rs1032284759	96010173	C	T	0	GGGGAAGCCAGGGAGGGACAGTGGG	GGGGAAGCTAGGGAGGGACAGTGGG	1	1
MRPS22	chr3	139025644	139025670	rs1032290232	139025664	A	G	0	GGGGAGGGGGCCAGGGGCGAGATGGGG	GGGGAGGGGGCCAGGGGCGAGGTGGGG	0	0
SLC1A3	chr5	36630266	36630287	rs1032313662	36630282	G	A	0	GGGAGAAGGGGGAGGGGGCGGG	GGGAGAAGGGGGAGGGGACGGG	0	0
MUC5B	chr11	1259864	1259887	rs1032320328	1259884	G	A	0	GGGCAGATGGGCAGGTGGGCAGGG	GGGCAGATGGGCAGGTGGGCAAGG	0	0
COX10	chr17	14048201	14048221	rs1032370705	14048212	G	T	0	GGGAGAGGGGTTGGGATGGGG	GGGAGAGGGGTTTGGATGGGG	0	0
RAI1	chr17	17641707	17641732	rs1032456991	17641710	C	G	0	GGGGCGGGGTGGGGTGGGCAGGAGGG	GGGGGGGGGTGGGGTGGGCAGGAGGG	0	0
GRHL2	chr8	102649300	102649326	rs1032491911	102649312	A	G	0	GGGACCATCTGGGAGGGAGGCTGGGGG	GGGACCATCTGGGGGGGAGGCTGGGGG	1	1
CHRM3	chr1	240011249	240011267	rs1032552819	240011254	G	A	0	GGGGAGGGGAGGGGAGGGG	GGGGAGAGGAGGGGAGGGG	0	0
IRAK3	chr12	66624445	66624467	rs1032575850	66624460	G	C	0	GGGTGGGGAAGGACAGGGTGGGG	GGGTGGGGAAGGACAGCGTGGGG	1	1
SCNN1G	chr16	23213571	23213585	rs1032599258	23213577	T	G	0	GGGTGGGTGGGTGGG	GGGTGGGGGGGTGGG	0	0
HOGA1	chr10	99349439	99349465	rs1032606741	99349448	G	A	0	GGGGCACCTAGGGAGGGTGCAGCAGGG	GGGGCACCTAAGGAGGGTGCAGCAGGG	0	0
RBPJ	chr4	26271913	26271939	rs1032645409	26271934	A	G	0	GGGAAGGGAAGGGGAGGGGAGGAGGGG	GGGAAGGGAAGGGGAGGGGAGGGGGGG	0	0
ANTXR1	chr2	69323420	69323446	rs1032748651	69323423	G	A	0	GGGAGGAAGGGAGGAAGGGAGGAAGGG	GGGAAGAAGGGAGGAAGGGAGGAAGGG	0	0
RYR2	chr1	237308357	237308388	rs1032748694	237308368	G	T	0	GGGGCCTGTCGGGGGGTTGGGGGAGCTAGGGG	GGGGCCTGTCGGTGGGTTGGGGGAGCTAGGGG	0	0
COL9A3	chr20	61448320	61448340	rs1032881629	61448334	A	G	0	GGGGGCGGGAAGGGGAAGGGG	GGGGGCGGGAAGGGGGAGGGG	0	0
RARA	chr17	38506895	38506917	rs1033023553	38506916	G	A	0	GGGGGATGGGATGGGGGAGGGGG	GGGGGATGGGATGGGGGAGGGGA	0	0
TRIOBP	chr22	38135314	38135340	rs1033334744	38135316	C	G	0	GGGCCGTGGGGCAGTGGGAGGTGGGGG	GGGGCGTGGGGCAGTGGGAGGTGGGGG	0	0
CACNB2	chr10	18763197	18763225	rs1033463178	18763223	G	C	0	GGGCCGGAGGGGCAGGGGGACTCTCAGGG	GGGCCGGAGGGGCAGGGGGACTCTCAGCG	1	1
VEGFA	chr6	43746011	43746032	rs1033498733	43746018	G	A	0	GGGTTGGGGGAGTTGGGGTGGG	GGGTTGGGAGAGTTGGGGTGGG	0	0
SQSTM1	chr5	179234403	179234428	rs1033515181	179234406	C	G	0	GGGGCCCGGGAGGCGGGAACGATGGG	GGGGGCCGGGAGGCGGGAACGATGGG	0	0
PIK3R2	chr19	18284531	18284556	rs1033555629	18284535	C	A	0	GGGACCCGAGGGGCGTGGGCATCGGG	GGGACACGAGGGGCGTGGGCATCGGG	1	1
TECPR2	chr14	102961827	102961858	rs1033584520	102961830	G	T	0	GGGGGATGCAGGGACTCCAGGGAAGGGAGGGG	GGGGTATGCAGGGACTCCAGGGAAGGGAGGGG	1	1
RYR1	chr19	38998085	38998109	rs1033594873	38998106	G	A	0	GGGCTGAGAAGGGCAGGGCCCGGGG	GGGCTGAGAAGGGCAGGGCCCGAGG	0	0
FAM20C	chr7	292644	292666	rs1033651869	292652	G	A	0	GGGGAAGGTGGGCTCTGGGAGGG	GGGGAAGGTAGGCTCTGGGAGGG	0	0
C10orf11	chr10	77773414	77773439	rs1033665774	77773432	T	G	0	GGGCAGGGACAGAGGGAGGTGGGGGG	GGGCAGGGACAGAGGGAGGGGGGGGG	1	1
ESRRB	chr14	76842898	76842922	rs1033667261	76842919	G	C	0	GGGACTTCGGGGGGGCACTTGGGGG	GGGACTTCGGGGGGGCACTTGGCGG	1	1
POU6F2	chr7	39317690	39317720	rs1033708651	39317695	G	A	0	GGGAGGGAGGGAGGGAGGGGGGGAGGGAGGG	GGGAGGAAGGGAGGGAGGGGGGGAGGGAGGG	0	0
DYSF	chr2	71710101	71710124	rs1033716447	71710107	G	A	0	GGGGTGGGGCAGAAGGGGTTGGGG	GGGGTGGAGCAGAAGGGGTTGGGG	0	0
CACNA1H	chr16	1230575	1230595	rs1033778670	1230577	G	A	0	GGGGGGGCCAGGGAGGAGGGG	GGGAGGGCCAGGGAGGAGGGG	0	0
NSD1	chr5	176588409	176588429	rs1033788928	176588424	A	G	0	GGGAGGGTGGGGCAGGAAGGG	GGGAGGGTGGGGCAGGGAGGG	0	0
STK11	chr19	1223486	1223509	rs1033834708	1223505	A	G	0	GGGAGCCCCAGGGTCGGGGGAGGG	GGGAGCCCCAGGGTCGGGGGGGGG	0	0
SDCCAG8	chr1	243656526	243656551	rs1033848611	243656530	T	G	0	GGGGGTGGGGGGAGGGGGATTCGGGG	GGGGGGGGGGGGAGGGGGATTCGGGG	0	0
DYSF	chr2	71740263	71740290	rs1033918279	71740271	G	A	0	GGGGTGGGCGGGGAAGGCAGGGTTGGGG	GGGGTGGGCAGGGAAGGCAGGGTTGGGG	0	0
HTT	chr4	3135658	3135683	rs1033974715	3135659	G	A	0	GGGTGCTTGGGGCTGCAGGGGAGGGG	GGATGCTTGGGGCTGCAGGGGAGGGG	0	0
MITF	chr3	69961420	69961446	rs1033984067	69961426	G	A	0	GGGGAGGGAGAGCAGGGAACTTATGGG	GGGGAGGAAGAGCAGGGAACTTATGGG	1	1
PCNT	chr21	47848727	47848749	rs1033989130	47848730	A	C	0	GGGCAAGAGGGGCCTGGGTTGGG	GGGCCAGAGGGGCCTGGGTTGGG	0	0
SEPT9	chr17	75371501	75371524	rs1034077237	75371503	A	G	0	GGGAGGGGAGGCCAGGGTTTGGGG	GGGGGGGGAGGCCAGGGTTTGGGG	0	0
GNA11	chr19	3105082	3105101	rs1034253473	3105088	A	G	0	GGGAGGGAGGGTGGGAGGGG	GGGAGGGGGGGTGGGAGGGG	0	0
CA2	chr8	86377073	86377092	rs1034403122	86377089	G	C	0	GGGGTGGGCCCGGGCCTGGG	GGGGTGGGCCCGGGCCTCGG	0	0
COL9A3	chr20	61459558	61459577	rs1034404038	61459572	G	A	0	GGGAAGTAAGGGTGGGTGGG	GGGAAGTAAGGGTGGATGGG	0	0
SLC4A4	chr4	72260629	72260657	rs1034420407	72260653	G	C	0	GGGAACTTGAGGGGAAGTGTGGGAGGGGG	GGGAACTTGAGGGGAAGTGTGGGAGCGGG	1	1
PTS	chr11	112097338	112097368	rs1034440057	112097364	G	A	0	GGGCCCGGGAGGGGCGCGGGGGCTGCTGGGG	GGGCCCGGGAGGGGCGCGGGGGCTGCTAGGG	0	0
F11	chr4	187188017	187188045	rs1034468225	187188040	A	G	0	GGGGCCGGCGGGGAAGGAGGGAGGAGGGG	GGGGCCGGCGGGGAAGGAGGGAGGGGGGG	0	0
PLCG2	chr16	81812804	81812832	rs1034498980	81812808	C	A	0	GGGCGCGCCTGGGGCGGGGCGAGGCGGGG	GGGCGAGCCTGGGGCGGGGCGAGGCGGGG	0	0
CLCNKA	chr1	16358801	16358827	rs1034648778	16358812	T	G	0	GGGGCGTGGGGATGGGGCGGGGGTGGG	GGGGCGTGGGGAGGGGGCGGGGGTGGG	0	0
PEX14	chr1	10656067	10656092	rs1034667279	10656071	A	G	0	GGGAAAGATGGGGCTAGGGCACCGGG	GGGAAGGATGGGGCTAGGGCACCGGG	0	0
VEGFA	chr6	43739496	43739523	rs1034746013	43739497	G	A	0	GGGGGCAGGGCGCAGGAGGGAGAGGGGG	GGAGGCAGGGCGCAGGAGGGAGAGGGGG	0	0
FZD6	chr8	104311165	104311197	rs1034768240	104311181	A	T	0	GGGGAACGGTGGGTTAGACGGGGACGGGAAGGG	GGGGAACGGTGGGTTAGTCGGGGACGGGAAGGG	0	0
MSH6	chr2	47971523	47971552	rs1034789933	47971547	G	A	0	GGGAGCCATGGGCTGGAGTGGGGTGGTGGG	GGGAGCCATGGGCTGGAGTGGGGTGATGGG	0	0
STK11	chr19	1212064	1212093	rs1034869790	1212071	T	C	0	GGGGGTAATGGGTCCACTGGGGGTTCTGGG	GGGGGTAACGGGTCCACTGGGGGTTCTGGG	0	0
TG	chr8	133945713	133945737	rs1034885546	133945715	C	T	0	GGGCATGTGGGGCAGGGGCAGGGGG	GGGTATGTGGGGCAGGGGCAGGGGG	0	0
SEPT9	chr17	75491134	75491161	rs1034940490	75491143	G	C	0	GGGAGAGTTAGGGATGGATGGGCCTGGG	GGGAGAGTTACGGATGGATGGGCCTGGG	0	0
PEX5	chr12	7342477	7342506	rs1034943468	7342479	A	G	0	GGGAGGGACCGGGCCGAGCCGGGGGAAGGG	GGGGGGGACCGGGCCGAGCCGGGGGAAGGG	1	1
GPR98	chr5	90082056	90082085	rs1034947393	90082069	G	A	0	GGGGCCTATTGGGGGGTGGGGGGCTAGGGG	GGGGCCTATTGGGGAGTGGGGGGCTAGGGG	0	0
RNASEH2B	chr13	51518122	51518154	rs1034949175	51518153	G	A	0	GGGATGGGACGGGACAGGACGGGATGGGATGGG	GGGATGGGACGGGACAGGACGGGATGGGATGGA	1	1
EIF2B5	chr3	184135228	184135254	rs1034993593	184135233	A	G	0	GGGGCCATGGGCGGGGGGCGGAGAGGG	GGGGCCGTGGGCGGGGGGCGGAGAGGG	0	0
TET2	chr4	106068994	106069018	rs1035068560	106069004	G	A	0	GGGGAGGGGGCGGGAGGGGGTGGGG	GGGGAGGGGGCAGGAGGGGGTGGGG	0	0
CDKAL1	chr6	20835343	20835369	rs1035117369	20835353	T	C	0	GGGCACTTGGGTAGAGGGTTTAGAGGG	GGGCACTTGGGCAGAGGGTTTAGAGGG	0	0
HMGA2	chr12	66219800	66219825	rs1035201976	66219807	G	A	0	GGGAGCCCGGGGCAGGGGCTACGGGG	GGGAGCCCAGGGCAGGGGCTACGGGG	0	0
SCN1B	chr19	35528944	35528970	rs1035228467	35528968	G	C	0	GGGAAGCTGGGGCAGGGCAGGCAGGGG	GGGAAGCTGGGGCAGGGCAGGCAGGCG	0	0
GCKR	chr2	27741808	27741835	rs1035269939	27741826	T	G	0	GGGATATGATGGGGCAGGGTTGGGTGGG	GGGATATGATGGGGCAGGGGTGGGTGGG	0	0
PNKD	chr2	219145185	219145212	rs1035297456	219145187	C	A	0	GGGCAGAACAGGGGATGGGGACAGAGGG	GGGAAGAACAGGGGATGGGGACAGAGGG	2	2
THRA	chr17	38222007	38222033	rs1035306451	38222017	T	G	0	GGGGCTGGGAATGGGGGAAGGGGGGGG	GGGGCTGGGAAGGGGGGAAGGGGGGGG	0	0
IL21R	chr16	27417714	27417738	rs1035338331	27417722	G	A	0	GGGGGTGGGGAGTGGGGGGTGCGGG	GGGGGTGGGAAGTGGGGGGTGCGGG	0	0
DNAI2	chr17	72285904	72285922	rs1035354684	72285911	T	C	0	GGGAGGGCTGAGGGCTGGG	GGGAGGGCCGAGGGCTGGG	0	0
BCAM	chr19	45315278	45315300	rs1035358527	45315296	A	C	0	GGGGAGGGACAGAGGGACCAGGG	GGGGAGGGACAGAGGGACCCGGG	2	2
FIP1L1	chr4	54769536	54769560	rs1035406677	54769546	A	G	0	GGGAGGGAAGGAGGGGGGGGAAGGG	GGGAGGGAAGGGGGGGGGGGAAGGG	0	0
PAX7	chr1	19010597	19010622	rs1035419928	19010620	G	A	0	GGGTGGGACAGGGCATGGGCAGAGGG	GGGTGGGACAGGGCATGGGCAGAGAG	1	1
ING1	chr13	111368426	111368457	rs1035440338	111368435	G	T	0	GGGCCGGACGGGCCCCGTGGGGTGACCCTGGG	GGGCCGGACGTGCCCCGTGGGGTGACCCTGGG	1	1
RBPJ	chr4	26199441	26199469	rs1035483830	26199445	A	G	0	GGGGAAGGGAAGGGAGGGGAGTGAAGGGG	GGGGAGGGGAAGGGAGGGGAGTGAAGGGG	0	0
MED25	chr19	50322210	50322235	rs1035511823	50322224	G	A	0	GGGGCCTGGGCTCCTGGGTCTGAGGG	GGGGCCTGGGCTCCTAGGTCTGAGGG	0	0
KIT	chr4	55547438	55547461	rs1035565582	55547443	G	C	0	GGGGATGGGGTGGGGGGTGCGGGG	GGGGATCGGGTGGGGGGTGCGGGG	0	0
CDHR1	chr10	85965929	85965948	rs1035575471	85965942	T	G	0	GGGCATTGGGTGGGTGGGGG	GGGCATTGGGTGGGGGGGGG	0	0
NEXN	chr1	78365194	78365215	rs1035581895	78365202	G	A	0	GGGATGCGGGGAGAGGGGAGGG	GGGATGCGGAGAGAGGGGAGGG	0	0
ITGB3	chr17	45336707	45336725	rs1035658113	45336717	T	G	0	GGGAGGGTGGGTGGGTGGG	GGGAGGGTGGGGGGGTGGG	0	0
GDAP1	chr8	75282152	75282174	rs1035661113	75282162	G	T	0	GGGGTGGGAAGGGGTGGTGAGGG	GGGGTGGGAAGTGGTGGTGAGGG	0	0
ZBTB16	chr11	113938961	113938980	rs1035682520	113938963	G	T	0	GGGGTGGGGGGGCAGAAGGG	GGGTTGGGGGGGCAGAAGGG	0	0
PSEN2	chr1	227079624	227079650	rs1035731961	227079626	T	G	0	GGGTGGAGGAGGGCATGAGGGGAGGGG	GGGGGGAGGAGGGCATGAGGGGAGGGG	0	0
CNNM4	chr2	97429619	97429644	rs1035740792	97429622	T	G	0	GGGGTGGGGGTGGGGGCGGCTTTGGG	GGGGGGGGGGTGGGGGCGGCTTTGGG	0	0
PLOD1	chr1	12031125	12031154	rs1035818293	12031146	T	G	0	GGGAGCCTGGGAGGGGCAGGGGTGAGTGGG	GGGAGCCTGGGAGGGGCAGGGGGGAGTGGG	0	0
DYNC1H1	chr14	102475983	102476006	rs1035832740	102475986	A	G	0	GGGAATGGGTCCACCTGGGCTGGG	GGGAGTGGGTCCACCTGGGCTGGG	0	0
LARS2	chr3	45506933	45506952	rs1035846695	45506948	G	C	0	GGGATGGGACTGGGCAGGGG	GGGATGGGACTGGGCACGGG	1	1
AP1S1	chr7	100804479	100804503	rs1035880385	100804484	G	A	0	GGGAGGGGTGGGGAGGGGGAGGGGG	GGGAGGAGTGGGGAGGGGGAGGGGG	0	0
BSND	chr1	55466635	55466655	rs1035922355	55466640	G	A	0	GGGGAGGGGAGGGGAGGAGGG	GGGGAGAGGAGGGGAGGAGGG	0	0
ACSF3	chr16	89219429	89219452	rs1035937358	89219445	C	A	0	GGGCAGGGGCAGGTGGGCAGGGGG	GGGCAGGGGCAGGTGGGAAGGGGG	0	0
POLR3B	chr12	106797589	106797610	rs1036045017	106797603	G	A	0	GGGGTGGGGGGAGGGGGGAGGG	GGGGTGGGGGGAGGGAGGAGGG	0	0
RET	chr10	43604859	43604882	rs1036072748	43604868	G	A	0	GGGCAGGGCTGGGGGCTCCTTGGG	GGGCAGGGCTAGGGGCTCCTTGGG	0	0
CDH23	chr10	73490660	73490683	rs1036142069	73490675	G	A	0	GGGGCTGGGCAGAGCTGGGAGGGG	GGGGCTGGGCAGAGCTAGGAGGGG	0	0
VSX2	chr14	74724734	74724763	rs1036170395	74724741	G	A	0	GGGGCGGGGGCCGCGAGGGGCTGCCGGGGG	GGGGCGGGAGCCGCGAGGGGCTGCCGGGGG	0	0
LRRK2	chr12	40618783	40618811	rs1036234153	40618800	G	A	0	GGGCGTGGGCGCCGATGGGGCCCGCGGGG	GGGCGTGGGCGCCGATGGAGCCCGCGGGG	0	0
MYO7A	chr11	76849473	76849502	rs1036277285	76849497	G	A	0	GGGCCAGGAGGGGAGAAGGGAGGGGGAGGG	GGGCCAGGAGGGGAGAAGGGAGGGGAAGGG	0	0
RAI1	chr17	17641707	17641732	rs1036416299	17641716	G	T	0	GGGGCGGGGTGGGGTGGGCAGGAGGG	GGGGCGGGGTTGGGTGGGCAGGAGGG	0	0
PLCG2	chr16	81876573	81876595	rs1036433699	81876591	T	G	0	GGGGGTGGGAGTGGAGGGATGGG	GGGGGTGGGAGTGGAGGGAGGGG	0	0
SDHC	chr1	161332591	161332616	rs1036476854	161332612	T	G	0	GGGGATGGGCCGGGTTGGGGGGTGGG	GGGGATGGGCCGGGTTGGGGGGGGGG	0	0
ABHD5	chr3	43733108	43733137	rs1036488138	43733133	C	G	0	GGGAAGCGGCGGGAGGGCGGGGGTGCCGGG	GGGAAGCGGCGGGAGGGCGGGGGTGCGGGG	0	0
DTNA	chr18	32074329	32074359	rs1036522584	32074353	C	G	0	GGGGGGCGGCGGGGGCGGGTGGGCACGGGGG	GGGGGGCGGCGGGGGCGGGTGGGCAGGGGGG	0	0
EPHB2	chr1	23129628	23129656	rs1036602804	23129653	G	A	0	GGGTAGTTGTGGGGCTTCTAGGGGAAGGG	GGGTAGTTGTGGGGCTTCTAGGGGAAAGG	0	0
POLD1	chr19	50920832	50920853	rs1036612812	50920849	T	G	0	GGGAACGGGTAGGCGGGGTGGG	GGGAACGGGTAGGCGGGGGGGG	0	0
SMAD6	chr15	67065548	67065571	rs1036667206	67065558	A	G	0	GGGGGGTGGGGAGGGGTGGGTGGG	GGGGGGTGGGGGGGGGTGGGTGGG	0	0
CIRH1A	chr16	69221648	69221676	rs1036752884	69221656	G	A	0	GGGTGAGCGGGGCCGGGCGGGAGGGTGGG	GGGTGAGCGAGGCCGGGCGGGAGGGTGGG	0	0
TSC2	chr16	2120903	2120928	rs1036764595	2120916	G	A	0	GGGCTGGGCAGGTGGGCGGCACAGGG	GGGCTGGGCAGGTGAGCGGCACAGGG	0	0
WDR65	chr1	43644807	43644827	rs1036810483	43644808	G	T	0	GGGGTGCGGGGAGGGGGAGGG	GGTGTGCGGGGAGGGGGAGGG	0	0
DHTKD1	chr10	12111306	12111337	rs1036814561	12111318	A	G	0	GGGGAGGAGGGGGAGGTGAGGGGAGCAGAGGG	GGGGAGGAGGGGGGGGTGAGGGGAGCAGAGGG	0	0
COL6A1	chr21	47420543	47420571	rs1036855098	47420564	A	G	0	GGGGAAGGGGGGAGGCCGGGGAAGGAGGG	GGGGAAGGGGGGAGGCCGGGGAGGGAGGG	0	0
MSH3	chr5	79950822	79950850	rs1036866527	79950840	G	C	0	GGGGGGGCGGGGCTTGTGGGTAAGGCGGG	GGGGGGGCGGGGCTTGTGGCTAAGGCGGG	0	0
PRPF6	chr20	62630308	62630330	rs1036867394	62630316	G	A	0	GGGTTGTGGGAGGGGCACCAGGG	GGGTTGTGGAAGGGGCACCAGGG	0	0
DPP10	chr2	115612683	115612710	rs1036919387	115612694	G	A	0	GGGAATGGTGGGGAGAAAAAGGGAAGGG	GGGAATGGTGGGAAGAAAAAGGGAAGGG	0	0
PPARG	chr3	12330235	12330256	rs1036988967	12330241	G	A	0	GGGGCTGGGGACGGGGACTGGG	GGGGCTGAGGACGGGGACTGGG	1	1
OPTN	chr10	13142025	13142050	rs1037046120	13142045	C	G	0	GGGCAGGGTGGGGGGGATGGGCGGGG	GGGCAGGGTGGGGGGGATGGGGGGGG	0	0
SLC35C1	chr11	45825717	45825744	rs1037167669	45825737	A	G	0	GGGTCCCGGGCGGGCGGGGGTACCAGGG	GGGTCCCGGGCGGGCGGGGGTGCCAGGG	0	0
ANO3	chr11	26558575	26558594	rs1037222445	26558576	G	A	0	GGGGACGGGGACTGGGTGGG	GGAGACGGGGACTGGGTGGG	1	1
ACADVL	chr17	7120959	7120975	rs1037229852	7120967	A	G	0	GGGGGAGGGAGGGAGGG	GGGGGAGGGGGGGAGGG	0	0
SLC34A2	chr4	25657193	25657221	rs1037254797	25657211	G	A	0	GGGCGCGCGGGGCGCCGAGGGGCGCGGGG	GGGCGCGCGGGGCGCCGAGAGGCGCGGGG	0	0
CPS1	chr2	211479597	211479626	rs1037285311	211479624	G	A	0	GGGGCCTGTCGGGGGGTGGGGAGGTAGGGG	GGGGCCTGTCGGGGGGTGGGGAGGTAGGAG	0	0
PTPRO	chr12	15483994	15484022	rs1037383337	15484005	C	A	0	GGGAGTGAAGGGCAGTGGGCCGGAAGGGG	GGGAGTGAAGGGAAGTGGGCCGGAAGGGG	0	0
CARD14	chr17	78149629	78149661	rs1037428798	78149630	G	A	0	GGGGTGGCAGGGGCAGAACCGGGCACTGCAGGG	GGAGTGGCAGGGGCAGAACCGGGCACTGCAGGG	1	1
C10orf11	chr10	78000857	78000882	rs1037476074	78000879	G	T	0	GGGGTCTTGGGGGAAAGGTGGGTGGG	GGGGTCTTGGGGGAAAGGTGGGTTGG	0	0
PEX5	chr12	7353501	7353521	rs1037533172	7353519	G	A	0	GGGAGAGGGAGAGGGAGAGGG	GGGAGAGGGAGAGGGAGAGAG	0	0
SGCD	chr5	155540996	155541016	rs1037556897	155541013	G	A	0	GGGGCTTGTGGGGAGGGAGGG	GGGGCTTGTGGGGAGGGAAGG	0	0
EHBP1	chr2	62999323	62999337	rs1037568202	62999324	G	A	0	GGGAGGGAGGGAGGG	GGAAGGGAGGGAGGG	0	0
HMGA2	chr12	66222145	66222164	rs1037636352	66222152	G	A	0	GGGGTTGCGGGGGGGGCGGG	GGGGTTGCAGGGGGGGCGGG	0	0
RAI1	chr17	17644258	17644287	rs1037660419	17644274	T	G	0	GGGAGGCCGTGGGCGGGTGGGAGGGGTGGG	GGGAGGCCGTGGGCGGGGGGGAGGGGTGGG	0	0
ANO3	chr11	26281120	26281146	rs1037666214	26281124	T	G	0	GGGGGTGGGGGTGGGGGGGCAGAGGGG	GGGGGGGGGGGTGGGGGGGCAGAGGGG	0	0
DRC1	chr2	26646198	26646216	rs1037714227	26646208	G	T	0	GGGGTGGGTGGGGGATGGG	GGGGTGGGTGGTGGATGGG	0	0
LEPR	chr1	65915041	65915062	rs1037740689	65915043	G	T	0	GGGGATGGGCTGAGGGCAAGGG	GGGTATGGGCTGAGGGCAAGGG	0	0
SLC6A19	chr5	1214923	1214947	rs1037798686	1214924	G	A	0	GGGGGCAGGGCCTGGGTAGGGAGGG	GGAGGCAGGGCCTGGGTAGGGAGGG	0	0
STIM1	chr11	4050800	4050821	rs1037878702	4050802	T	G	0	GGGTGGGCGGGGTGGGGGTGGG	GGGGGGGCGGGGTGGGGGTGGG	0	0
SYNGAP1	chr6	33388151	33388173	rs1037878939	33388157	G	A	0	GGGGGAGGGGCAGGGGGCGGGGG	GGGGGAGAGGCAGGGGGCGGGGG	0	0
KCNQ1	chr11	2818381	2818407	rs1037881889	2818402	G	A	0	GGGCAGACCTGGGGGGGTGGCGGGGGG	GGGCAGACCTGGGGGGGTGGCGAGGGG	1	1
LAMA3	chr18	21273910	21273935	rs1037899174	21273934	G	T	0	GGGTGAGTAGGGTCACCTGGGCAGGG	GGGTGAGTAGGGTCACCTGGGCAGGT	0	0
KAT6B	chr10	76586779	76586810	rs1037942505	76586791	C	G	0	GGGCGGAGGGGGGCGGGGCGGGATCGGGTGGG	GGGCGGAGGGGGGGGGGGCGGGATCGGGTGGG	0	0
IFT122	chr3	129221783	129221807	rs1037996965	129221785	T	G	0	GGGTGGGTACAGGGGCCCTTTGGGG	GGGGGGGTACAGGGGCCCTTTGGGG	0	0
ARHGAP26	chr5	142406360	142406386	rs1038016154	142406367	T	G	0	GGGGTGGGTGGGGGTGGGGGGTGGGGG	GGGGTGGGGGGGGGTGGGGGGTGGGGG	0	0
C10orf11	chr10	77472187	77472211	rs1038056890	77472193	T	G	0	GGGCGGGTGGGGGCGGTTGGGGGGG	GGGCGGGGGGGGGCGGTTGGGGGGG	0	0
OCLN	chr5	68788750	68788781	rs1038078500	68788773	C	T	0	GGGGCGCACGGGAGCCCGAGGGTCCCCGTGGG	GGGGCGCACGGGAGCCCGAGGGTCTCCGTGGG	0	0
DYSF	chr2	71823521	71823552	rs1038107826	71823537	G	A	0	GGGAAGCACGGGGCGGGGCGGGAACAAAAGGG	GGGAAGCACGGGGCGGGACGGGAACAAAAGGG	1	1
TECPR2	chr14	102884266	102884297	rs1038109700	102884271	C	T	0	GGGAGCCGCAGGGAGGCAGGGGAGCCGCAGGG	GGGAGCTGCAGGGAGGCAGGGGAGCCGCAGGG	0	0
KCNQ1	chr11	2688199	2688225	rs1038113292	2688212	G	C	0	GGGCCCGCCCGGGAGGGCTGTACAGGG	GGGCCCGCCCGGGACGGCTGTACAGGG	0	0
CDH23	chr10	73545507	73545530	rs1038124937	73545518	G	A	0	GGGCACTGGTGGGAGTGGGCTGGG	GGGCACTGGTGGAAGTGGGCTGGG	0	0
AGRN	chr1	976487	976511	rs1038187050	976501	C	G	0	GGGGCGGGAGCGGGGCGGGAGCGGG	GGGGCGGGAGCGGGGGGGGAGCGGG	0	0
ALG1	chr16	5109906	5109930	rs1038249214	5109908	G	A	0	GGGGTGGAGTGGGTGGGGTGGGGGG	GGGATGGAGTGGGTGGGGTGGGGGG	0	0
UPB1	chr22	24893498	24893530	rs1038266144	24893499	G	T	0	GGGCCCTGAAGGGCATGGTGGGGCTAGGATGGG	GGTCCCTGAAGGGCATGGTGGGGCTAGGATGGG	0	0
OCLN	chr5	68824951	68824974	rs1038301517	68824952	G	C	0	GGGAGTCAGGGTGGGGAAGGTGGG	GGCAGTCAGGGTGGGGAAGGTGGG	0	0
COL9A3	chr20	61456266	61456294	rs1038320153	61456291	G	A	0	GGGAGGGGGTGTCGGGGGGTCTGGGTGGG	GGGAGGGGGTGTCGGGGGGTCTGGGTAGG	0	0
HTT	chr4	3237731	3237755	rs1038347802	3237740	C	T	0	GGGCTGGGTCCTGGGCAAGCAAGGG	GGGCTGGGTCTTGGGCAAGCAAGGG	0	0
DPP6	chr7	154477147	154477168	rs1038393114	154477156	T	G	0	GGGTGGGGCCTGGGCGTCAGGG	GGGTGGGGCCGGGGCGTCAGGG	0	0
CAMTA1	chr1	7507479	7507503	rs1038472244	7507488	T	G	0	GGGGGCGGGGTGGGGGGTGAGGGGG	GGGGGCGGGGGGGGGGGTGAGGGGG	0	0
LRAT	chr4	155627582	155627603	rs1038473916	155627585	T	G	0	GGGGTGGGGGGAGGGGGGAGGG	GGGGGGGGGGGAGGGGGGAGGG	0	0
FIP1L1	chr4	54767735	54767761	rs1038479915	54767753	A	G	0	GGGAGGGAGGGAGGGAGGGAGGGAGGG	GGGAGGGAGGGAGGGAGGGGGGGAGGG	0	0
CACNA1H	chr16	1245299	1245325	rs1038479946	1245300	G	A	0	GGGGCTCAGGGCGGGGCAGGGGCGGGG	GGAGCTCAGGGCGGGGCAGGGGCGGGG	0	0
NDUFV1	chr11	67378864	67378894	rs1038487362	67378868	C	A	0	GGGGCCCCAGGGGGTGTCACGGGCGGCTGGG	GGGGCACCAGGGGGTGTCACGGGCGGCTGGG	0	0
RUNX2	chr6	45503512	45503539	rs1038549659	45503514	T	C	0	GGGTAGGGGGCTAGTGGGATACTAAGGG	GGGCAGGGGGCTAGTGGGATACTAAGGG	0	0
TECR	chr19	14647978	14648006	rs1038556739	14647982	C	G	0	GGGGCCGGGGGGGAAGGGGAGGCCGAGGG	GGGGCGGGGGGGGAAGGGGAGGCCGAGGG	0	0
F2	chr11	46752074	46752103	rs1038596393	46752099	G	T	0	GGGCAGCAGTGGGTGAGGGGAGAGAGGGGG	GGGCAGCAGTGGGTGAGGGGAGAGAGTGGG	0	0
PTPRQ	chr12	80907303	80907331	rs1038599317	80907330	G	C	0	GGGGCGTGGTGGGCCAGGGTGGTGTTGGG	GGGGCGTGGTGGGCCAGGGTGGTGTTGGC	0	0
GNMT	chr6	42930988	42931008	rs1038661129	42930992	T	G	0	GGGGGTGGGGTGGAGGGAGGG	GGGGGGGGGGTGGAGGGAGGG	0	0
CNTNAP2	chr7	147499862	147499889	rs1038661666	147499884	G	A	0	GGGGAGAGGGAGAGGGAGGGGGAGGGGG	GGGGAGAGGGAGAGGGAGGGGGAAGGGG	0	0
DNAJB6	chr7	157170296	157170319	rs1038710686	157170315	G	C	0	GGGGTGGGATGGTGTGGGGTGGGG	GGGGTGGGATGGTGTGGGGTCGGG	0	0
AANAT	chr17	74465475	74465498	rs1038743904	74465476	G	C	0	GGGGAGGGGAGCCCAGGGGCTGGG	GGCGAGGGGAGCCCAGGGGCTGGG	0	0
MYLK2	chr20	30410405	30410429	rs1038813758	30410419	T	G	0	GGGCTGGGGGTGGGGTGAGATGGGG	GGGCTGGGGGTGGGGGGAGATGGGG	0	0
NFIX	chr19	13199788	13199816	rs1038854866	13199796	T	G	0	GGGCCAGGGTGGGCAGCTCTGGGGGTGGG	GGGCCAGGGGGGGCAGCTCTGGGGGTGGG	0	0
TCF7L2	chr10	114902098	114902120	rs1038872156	114902114	G	A	0	GGGGAGAGGGAGGGAAGGTGGGG	GGGGAGAGGGAGGGAAGATGGGG	0	0
EIF2B5	chr3	184322308	184322333	rs1039017133	184322326	T	G	0	GGGGCCGGGCGAGGGTGGGTGGGGGG	GGGGCCGGGCGAGGGTGGGGGGGGGG	0	0
POLR1C	chr6	43477620	43477647	rs1039059517	43477643	G	A	0	GGGGTCGCGGGCGGAGTGGGGCCGGGGG	GGGGTCGCGGGCGGAGTGGGGCCGAGGG	0	0
EIF2B5	chr3	184319851	184319880	rs1039070300	184319858	A	G	0	GGGGCGGGAGGGGAGGCTGGGGGCGGCGGG	GGGGCGGGGGGGGAGGCTGGGGGCGGCGGG	0	0
CHST3	chr10	73760351	73760372	rs1039102187	73760359	T	G	0	GGGCCAGGGTGGGGGTGTTGGG	GGGCCAGGGGGGGGGTGTTGGG	0	0
TTC7A	chr2	47208619	47208639	rs1039107746	47208637	G	C	0	GGGAGGGGCAGAGAGGGTGGG	GGGAGGGGCAGAGAGGGTGCG	0	0
PLOD1	chr1	11995405	11995434	rs1039109066	11995423	G	A	0	GGGAATGAGGGGTCTTGAGGGGGACAGGGG	GGGAATGAGGGGTCTTGAGAGGGACAGGGG	1	1
PLCG2	chr16	81943604	81943630	rs1039111838	81943619	T	G	0	GGGGGATGGGGTGGGGTGGGGTGGGGG	GGGGGATGGGGTGGGGGGGGGTGGGGG	0	0
KALRN	chr3	124238397	124238424	rs1039134069	124238407	G	C	0	GGGTTATGGGGGAGGGCAGGGTAAAGGG	GGGTTATGGGGCAGGGCAGGGTAAAGGG	0	0
SOD1	chr21	33032426	33032449	rs1039156345	33032433	G	T	0	GGGCCGGGGAGGGGCGGGGGCGGG	GGGCCGGGTAGGGGCGGGGGCGGG	0	0
FAS	chr10	90764934	90764956	rs1039267139	90764953	G	A	0	GGGAGGGAGGGAGGGAGGGAGGG	GGGAGGGAGGGAGGGAGGGAAGG	0	0
BCAM	chr19	45316626	45316653	rs1039274635	45316627	G	T	0	GGGACGTGGGCTGGGGTGGGTGGCGGGG	GGTACGTGGGCTGGGGTGGGTGGCGGGG	0	0
DPP6	chr7	154061621	154061644	rs1039318851	154061634	G	T	0	GGGCAGGGGCGGTGGGGTGGGGGG	GGGCAGGGGCGGTGTGGTGGGGGG	0	0
SPINT2	chr19	38747235	38747262	rs1039335513	38747248	C	T	0	GGGGGCTCCCGGGCCGGGATCCTGTGGG	GGGGGCTCCCGGGCTGGGATCCTGTGGG	0	0
NDUFS7	chr19	1394935	1394964	rs1039350779	1394956	T	C	0	GGGTCATCGGGTCCTCGTGGGATGCCCGGG	GGGTCATCGGGTCCTCGTGGGACGCCCGGG	0	0
PDP1	chr8	94928913	94928931	rs1039353988	94928914	G	T	0	GGGGGCGGGGGGGGGGGGG	GGTGGCGGGGGGGGGGGGG	0	0
SLC6A19	chr5	1214965	1214988	rs1039370587	1214980	A	G	0	GGGGGCCTGGGTAGGGAGGGTGGG	GGGGGCCTGGGTAGGGGGGGTGGG	0	0
SMC3	chr10	112327853	112327875	rs1039399100	112327864	G	A	0	GGGCCGGCGGGCGGGCCGCTGGG	GGGCCGGCGGGCAGGCCGCTGGG	0	0
COL18A1	chr21	46926977	46927004	rs1039461888	46927000	A	T	0	GGGAGGGCTGGGTGCTGGGCAGGGAGGG	GGGAGGGCTGGGTGCTGGGCAGGGTGGG	0	0
ARID1B	chr6	157219227	157219248	rs1039549912	157219229	T	C	0	GGGTTAGACTGGGGAGGGAGGG	GGGCTAGACTGGGGAGGGAGGG	1	1
VPS13B	chr8	100246729	100246754	rs1039555121	100246732	A	C	0	GGGAAGGGGCTTCCGCGGGGTTGGGG	GGGACGGGGCTTCCGCGGGGTTGGGG	0	0
CD81	chr11	2405629	2405654	rs1039590845	2405649	T	G	0	GGGGTGGGACAGCTTGGGGGGTGGGG	GGGGTGGGACAGCTTGGGGGGGGGGG	1	1
DNASE1	chr16	3713660	3713692	rs1039598524	3713677	C	A	0	GGGCCACACTGGGGAACACCGGGGCAGTTGGGG	GGGCCACACTGGGGAACAACGGGGCAGTTGGGG	1	1
HOXD4	chr2	177016975	177017003	rs1039625103	177016995	T	G	0	GGGCGCAAAAGGGGGTGGGGATGGGGGGG	GGGCGCAAAAGGGGGTGGGGAGGGGGGGG	0	0
TRIOBP	chr22	38147939	38147958	rs1039677030	38147949	T	G	0	GGGGGTGGGGCTGGGAGGGG	GGGGGTGGGGCGGGGAGGGG	0	0
CNTNAP2	chr7	147876668	147876697	rs1039721585	147876679	A	G	0	GGGGTGCGGGGGAGAGAGAGGGAGGGAGGG	GGGGTGCGGGGGGGAGAGAGGGAGGGAGGG	0	0
ZFPM2	chr8	106510173	106510192	rs1039803236	106510181	A	T	0	GGGAGGGTGAGGTGGGAGGG	GGGAGGGTGTGGTGGGAGGG	0	0
GNAL	chr18	11747610	11747640	rs1039928076	11747632	T	C	0	GGGGTACTGGGGATGGATAGGGGTACTGGGG	GGGGTACTGGGGATGGATAGGGGCACTGGGG	0	0
HMCN1	chr1	185709811	185709834	rs1039996325	185709820	T	G	0	GGGCAGGGGGTGGGGGGTAGGGGG	GGGCAGGGGGGGGGGGGTAGGGGG	0	0
MSH6	chr2	48010960	48010986	rs1040023547	48010962	T	G	0	GGGTGGGGAGGGGGCCTGGGAGGTGGG	GGGGGGGGAGGGGGCCTGGGAGGTGGG	0	0
CHAT	chr10	50898016	50898043	rs1040036346	50898026	G	A	0	GGGTCCGAGAGGGATGGGGAGCGCTGGG	GGGTCCGAGAGAGATGGGGAGCGCTGGG	0	0
MYO15A	chr17	18063126	18063146	rs1040042718	18063135	C	A	0	GGGGAGGGGGCTGGGAAAGGG	GGGGAGGGGGATGGGAAAGGG	0	0
PHKB	chr16	47675036	47675054	rs1040058851	47675044	A	G	0	GGGGAGGGGAGGGGAGGGG	GGGGAGGGGGGGGGAGGGG	0	0
CACNA1C	chr12	2741074	2741103	rs1040065640	2741095	G	A	0	GGGCATGGCTGGGAAGTGGGAAGTTAAGGG	GGGCATGGCTGGGAAGTGGGAAATTAAGGG	0	0
GUCA1A	chr6	42126275	42126298	rs1040118167	42126283	C	A	0	GGGCCTGGGCTAGGGCAGAAAGGG	GGGCCTGGGATAGGGCAGAAAGGG	0	0
PLCG2	chr16	81971975	81971995	rs1040142544	81971981	C	T	0	GGGCGGGCGGGTGGTAGGGGG	GGGCGGGTGGGTGGTAGGGGG	0	0
CD81	chr11	2403790	2403816	rs1040232548	2403795	G	A	0	GGGAGGGAGAGGGCTGGGTGATGGGGG	GGGAGGAAGAGGGCTGGGTGATGGGGG	0	0
D2HGDH	chr2	242707015	242707041	rs1040271896	242707030	C	T	0	GGGGGTCTCGGGGTTGCTGGGGAGGGG	GGGGGTCTCGGGGTTGTTGGGGAGGGG	0	0
CAMTA1	chr1	7764874	7764893	rs1040276147	7764889	C	G	0	GGGGCCGGGCGGGGCGCGGG	GGGGCCGGGCGGGGCGGGGG	0	0
TUBB3	chr16	89998711	89998733	rs1040297280	89998714	C	A	0	GGGCCTGGGGACCTGGGTGTGGG	GGGCATGGGGACCTGGGTGTGGG	1	1
CACNA1C	chr12	2544703	2544726	rs1040306752	2544718	T	A	0	GGGCAGGGGGAAGGGTTGCCCGGG	GGGCAGGGGGAAGGGTAGCCCGGG	0	0
TENM3	chr4	183600202	183600230	rs1040338083	183600212	G	A	0	GGGCCTGTCAGGGTGTCAGGGGCTAGGGG	GGGCCTGTCAGAGTGTCAGGGGCTAGGGG	0	0
PGM1	chr1	64076837	64076863	rs1040365068	64076855	G	T	0	GGGTGTATTGGGGGCCCTAGGGAGGGG	GGGTGTATTGGGGGCCCTATGGAGGGG	0	0
ARHGEF10	chr8	1799183	1799212	rs1040449746	1799193	G	C	0	GGGTTGCTAGGGGTTTGCGGGGGGGAGGGG	GGGTTGCTAGGCGTTTGCGGGGGGGAGGGG	0	0
SPINK5	chr5	147428019	147428043	rs1040529484	147428022	G	T	0	GGGGGTGTTGGGGGCAAGGGGAGGG	GGGGTTGTTGGGGGCAAGGGGAGGG	0	0
MYO7A	chr11	76848301	76848326	rs1040566909	76848311	T	C	0	GGGACAGGGAGTGGGGTAGAACTGGG	GGGACAGGGAGCGGGGTAGAACTGGG	2	2
HK1	chr10	71089490	71089514	rs1040568534	71089500	G	C	0	GGGAAAGACTGGGGTGGGAGAGGGG	GGGAAAGACTGCGGTGGGAGAGGGG	1	1
ADK	chr10	76433790	76433808	rs1040620820	76433791	G	A	0	GGGTGGGGTGGGCCATGGG	GGATGGGGTGGGCCATGGG	0	0
TRIOBP	chr22	38148109	38148131	rs1040648242	38148113	G	A	0	GGGTGGGAGTCAAGGGTCTTGGG	GGGTGAGAGTCAAGGGTCTTGGG	0	0
DYSF	chr2	71762258	71762285	rs1040650743	71762274	G	A	0	GGGGCTCTGGGCTTCGGGAGGTCCAGGG	GGGGCTCTGGGCTTCGGAAGGTCCAGGG	0	0
FLNC	chr7	128485882	128485908	rs1040713061	128485890	G	A	0	GGGAGTTGGGGAGTGGGAGAGGAGGGG	GGGAGTTGGAGAGTGGGAGAGGAGGGG	0	0
COL18A1	chr21	46923551	46923572	rs1040767735	46923552	G	T	0	GGGGTGGGGGGAGGGGGGAGGG	GGTGTGGGGGGAGGGGGGAGGG	0	0
PRKCH	chr14	61996474	61996495	rs1040845364	61996482	G	A	0	GGGGTGGGGGGAGGGGGGAGGG	GGGGTGGGGAGAGGGGGGAGGG	0	0
TSEN54	chr17	73517977	73518000	rs1040846492	73517984	G	C	0	GGGAGGGGGTGGGGTGCAGCTGGG	GGGAGGGGCTGGGGTGCAGCTGGG	0	0
NDUFS7	chr19	1383962	1383987	rs1040847398	1383984	G	C	0	GGGTGTGGGGCCGCGCGGGTCTGGGG	GGGTGTGGGGCCGCGCGGGTCTGCGG	0	0
MTRR	chr5	7869460	7869484	rs1040875183	7869474	C	G	0	GGGTCGCCGCGGGCGCGGGCTGGGG	GGGTCGCCGCGGGCGGGGGCTGGGG	0	0
ATP1A2	chr1	160107609	160107627	rs1040887925	160107615	G	A	0	GGGGCTGGGGAGGGTGGGG	GGGGCTGAGGAGGGTGGGG	0	0
SLC12A3	chr16	56902006	56902029	rs1040910574	56902015	G	T	0	GGGAGGGATAGGTGGGTCTCTGGG	GGGAGGGATATGTGGGTCTCTGGG	0	0
TRIOBP	chr22	38158009	38158025	rs1040914829	38158024	G	T	0	GGGTGGGTGGGGCTGGG	GGGTGGGTGGGGCTGGT	0	0
CCND1	chr11	69469101	69469124	rs1040921012	69469104	C	T	0	GGGTCTGGGCGGCGGGCGGCTGGG	GGGTTTGGGCGGCGGGCGGCTGGG	0	0
LAMA3	chr18	21278098	21278125	rs1040925995	21278106	T	G	0	GGGAGGGGGTGGGTGGGGTGGTGGGGGG	GGGAGGGGGGGGGTGGGGTGGTGGGGGG	0	0
CDH15	chr16	89254409	89254432	rs1040949287	89254419	A	G	0	GGGAGGGTGGGAGGGGAGGGTGGG	GGGAGGGTGGGGGGGGAGGGTGGG	0	0
TAB2	chr6	149569047	149569067	rs1040976502	149569049	G	A	0	GGGGTAGGGGCAGCGGGTGGG	GGGATAGGGGCAGCGGGTGGG	0	0
ATP6V1B1	chr2	71165374	71165396	rs1041027410	71165381	G	A	0	GGGAGTGGGAGGGATGAGGGGGG	GGGAGTGGAAGGGATGAGGGGGG	0	0
EHBP1	chr2	63070590	63070609	rs1041038697	63070599	G	A	0	GGGGTGGGTGGGGCAGTGGG	GGGGTGGGTGAGGCAGTGGG	0	0
IFT122	chr3	129221783	129221807	rs1041113576	129221805	G	A	0	GGGTGGGTACAGGGGCCCTTTGGGG	GGGTGGGTACAGGGGCCCTTTGGAG	0	0
MLPH	chr2	238404920	238404945	rs1041131747	238404940	G	A	0	GGGAGGGAGCAAGTGGGGCCTGGGGG	GGGAGGGAGCAAGTGGGGCCTAGGGG	0	0
CNTNAP2	chr7	146722430	146722460	rs1041145809	146722455	A	G	0	GGGGGGAGGGGAGGGGAGGGGAAGGGAGGGG	GGGGGGAGGGGAGGGGAGGGGAAGGGGGGGG	0	0
GPR98	chr5	89825463	89825487	rs1041204053	89825480	G	A	0	GGGCGGAGGTGGGAAGGGGCGGGGG	GGGCGGAGGTGGGAAGGGACGGGGG	0	0
SLC4A4	chr4	72344315	72344343	rs1041209153	72344317	T	C	0	GGGTCTGTTAGGGGGTTGGGGGCAAGGGG	GGGCCTGTTAGGGGGTTGGGGGCAAGGGG	0	0
SEPN1	chr1	26127063	26127086	rs1041369569	26127072	T	G	0	GGGTGGGGGGTGCCTGGGGCCGGG	GGGTGGGGGGGGCCTGGGGCCGGG	0	0
CRADD	chr12	94193979	94194004	rs1041439782	94193982	T	C	0	GGGGTAGGGACTGGGGGTGTATAGGG	GGGGCAGGGACTGGGGGTGTATAGGG	1	1
CLCN1	chr7	143016651	143016681	rs1041454164	143016669	G	A	0	GGGAAAGGGTGGGAAGTGTGGGAATGGAGGG	GGGAAAGGGTGGGAAGTGTAGGAATGGAGGG	0	0
CACNA1C	chr12	2739679	2739706	rs1041468680	2739705	G	A	0	GGGAGGAGGGGACAAAGGGGCAATGGGG	GGGAGGAGGGGACAAAGGGGCAATGGGA	1	1
KCNQ1	chr11	2798565	2798593	rs1041477301	2798582	G	C	0	GGGTGATCCTGGGGTGGGGTTTGGGTGGG	GGGTGATCCTGGGGTGGGCTTTGGGTGGG	0	0
PLCB4	chr20	9125395	9125426	rs1041515067	9125402	A	G	0	GGGGAAGGAGGGGAAGGAGGGGAATGAGGGGG	GGGGAAGGGGGGGAAGGAGGGGAATGAGGGGG	0	0
ROBO2	chr3	77589708	77589740	rs1041542522	77589736	A	G	0	GGGGCCAGTCGGGGGCAGTGGGGGCGCGCAGGG	GGGGCCAGTCGGGGGCAGTGGGGGCGCGCGGGG	0	0
TPCN2	chr11	68856196	68856220	rs1041589522	68856219	G	T	0	GGGGGCCTGGGGTGGGGAGGTGGGG	GGGGGCCTGGGGTGGGGAGGTGGGT	0	0
RB1	chr13	48878407	48878424	rs1041667991	48878409	C	A	0	GGGCGGGTGGGGCTAGGG	GGGAGGGTGGGGCTAGGG	0	0
CTDP1	chr18	77479329	77479359	rs1041671264	77479345	T	C	0	GGGTGGCTGCGGGCAGCTGGGCCGGTGCGGG	GGGTGGCTGCGGGCAGCCGGGCCGGTGCGGG	0	0
BCKDHB	chr6	80878336	80878354	rs1041692996	80878350	A	G	0	GGGAGGGAGGGAGGGAGGG	GGGAGGGAGGGAGGGGGGG	0	0
KCTD7	chr7	66107801	66107831	rs1041737819	66107807	A	G	0	GGGAAGGATGGGGGTTGGCAGGGGTTGAGGG	GGGAAGGGTGGGGGTTGGCAGGGGTTGAGGG	0	0
PNPO	chr17	46023500	46023524	rs1041800438	46023513	A	G	0	GGGAAAGTGGGGGTAGGGAGAGGGG	GGGAAAGTGGGGGTGGGGAGAGGGG	0	0
TAB2	chr6	149639458	149639489	rs1041916698	149639460	T	A	0	GGGTGGGGGAGGGCGCAAGGGGCTCGGGAGGG	GGGAGGGGGAGGGCGCAAGGGGCTCGGGAGGG	0	0
FBLN1	chr22	45912165	45912192	rs1041977701	45912171	G	A	0	GGGTGAAGGGGGTAGGGGGACAGATGGG	GGGTGAAAGGGGTAGGGGGACAGATGGG	1	1
PCK1	chr20	56139694	56139723	rs1042019048	56139722	G	A	0	GGGAACATGGGTGTGCTGGGTACCGAAGGG	GGGAACATGGGTGTGCTGGGTACCGAAGGA	1	1
COMT	chr22	19938131	19938162	rs1042046893	19938142	A	G	0	GGGACCGTGGGGAGTTGAGGGGCTGGAGGGGG	GGGACCGTGGGGGGTTGAGGGGCTGGAGGGGG	1	1
HMBS	chr11	118963528	118963553	rs1042062524	118963545	A	C	0	GGGGGGAAATGGGCGGGAAGCCAGGG	GGGGGGAAATGGGCGGGACGCCAGGG	0	0
GPHN	chr14	67013488	67013513	rs1042081664	67013506	G	T	0	GGGAGAGGGAGACCGTGGGGAGAGGG	GGGAGAGGGAGACCGTGGGTAGAGGG	1	1
DYSF	chr2	71740584	71740600	rs1042086451	71740585	G	T	0	GGGTGGGAGGGCTAGGG	GGTTGGGAGGGCTAGGG	0	0
KCNQ1	chr11	2756523	2756546	rs1042097635	2756540	G	A	0	GGGGCCCTGGGGTGGGAGGTGGGG	GGGGCCCTGGGGTGGGAGATGGGG	0	0
EPB41L1	chr20	34707576	34707604	rs1042153791	34707601	G	C	0	GGGGAGGGGAGAGGAGGGGAAGGGAGGGG	GGGGAGGGGAGAGGAGGGGAAGGGAGCGG	0	0
TRPM4	chr19	49714222	49714241	rs1042159962	49714230	T	G	0	GGGGGTGGGTGGGCTGCGGG	GGGGGTGGGGGGGCTGCGGG	0	0
COL6A1	chr21	47416878	47416904	rs1042204454	47416901	G	A	0	GGGACCATGAGGGAGGGCAGTCTGGGG	GGGACCATGAGGGAGGGCAGTCTGAGG	1	1
PAX7	chr1	19003076	19003104	rs1042234768	19003098	G	C	0	GGGGGATTGGGGGATCCTGGGAGGCAGGG	GGGGGATTGGGGGATCCTGGGAGCCAGGG	0	0
HSD17B4	chr5	118898048	118898073	rs1042266136	118898069	A	C	0	GGGGAAGATTGGGAGGTGGGTGAGGG	GGGGAAGATTGGGAGGTGGGTGCGGG	0	0
TBX1	chr22	19755945	19755967	rs1042272295	19755954	G	A	0	GGGTGGGAGGGGGTCTCCAGGGG	GGGTGGGAGGAGGTCTCCAGGGG	0	0
ALDOA	chr16	30066254	30066279	rs1042312713	30066277	G	A	0	GGGTCTGGTCGGGGATAAAGGGTGGG	GGGTCTGGTCGGGGATAAAGGGTGAG	0	0
WFS1	chr4	6286945	6286973	rs1042339225	6286951	T	C	0	GGGGCATTCAGGGAGAGGGACATTCAGGG	GGGGCATCCAGGGAGAGGGACATTCAGGG	1	1
JPH3	chr16	87721443	87721467	rs1042534067	87721445	C	T	0	GGGCGCCATCGGGGGATGGGGGGGG	GGGTGCCATCGGGGGATGGGGGGGG	0	0
CAT	chr11	34486023	34486047	rs1042595689	34486030	G	A	0	GGGATATGGGGAGGGGGCATTGGGG	GGGATATGAGGAGGGGGCATTGGGG	0	0
GPR98	chr5	90035987	90036008	rs1042602231	90035998	G	A	0	GGGTCTGGGAAGGGTCAGAGGG	GGGTCTGGGAAGAGTCAGAGGG	0	0
TBX4	chr17	59534783	59534801	rs1042729084	59534788	C	T	0	GGGCTCCGGGCGGGCAGGG	GGGCTCTGGGCGGGCAGGG	0	0
CLN8	chr8	1732964	1732984	rs1042768761	1732977	G	C	0	GGGCAGGGCTGGGAGGCTGGG	GGGCAGGGCTGGGACGCTGGG	0	0
CHRM3	chr1	240003096	240003120	rs1042862200	240003112	G	A	0	GGGGCGGGGGGGGAGCGGGGAAGGG	GGGGCGGGGGGGGAGCGAGGAAGGG	0	0
ADCK3	chr1	227164077	227164103	rs1042863042	227164083	T	C	0	GGGGCTGTGGGACTGCGGGGCTGTGGG	GGGGCTGCGGGACTGCGGGGCTGTGGG	1	1
SMOC1	chr14	70391397	70391424	rs1042879248	70391420	G	A	0	GGGAGAGGGGAGGTAAGGGAGCTAGGGG	GGGAGAGGGGAGGTAAGGGAGCTAAGGG	0	0
IRF4	chr6	393460	393485	rs1042901169	393480	G	T	0	GGGACCGCGCGGGGCGGACGGGCGGG	GGGACCGCGCGGGGCGGACGGTCGGG	1	1
SUGCT	chr7	40633775	40633796	rs1042977258	40633787	A	G	0	GGGGTGCGGGGAGAGGGGAGGG	GGGGTGCGGGGAGGGGGGAGGG	0	0
SMOC1	chr14	70484844	70484873	rs1042997078	70484868	G	T	0	GGGCAGAAGGGAGCTGCAGGGTTAGGTGGG	GGGCAGAAGGGAGCTGCAGGGTTAGTTGGG	0	0
RYR2	chr1	237618719	237618739	rs1043022037	237618725	G	A	0	GGGTGGAGGGTGGGAGGAGGG	GGGTGGAAGGTGGGAGGAGGG	0	0
CDH23	chr10	73462536	73462560	rs1043161589	73462542	G	T	0	GGGCTGGGGCAGGGGAGGAGCTGGG	GGGCTGGTGCAGGGGAGGAGCTGGG	0	0
WWOX	chr16	78679732	78679757	rs1043183016	78679735	T	G	0	GGGCTGGGCTCTGGGGGCTTCTGGGG	GGGCGGGGCTCTGGGGGCTTCTGGGG	0	0
RPS24	chr10	79793935	79793954	rs1043239619	79793940	A	G	0	GGGGGTAGGGGGCGGGCGGG	GGGGGTGGGGGGCGGGCGGG	0	0
KAT6B	chr10	76587417	76587442	rs1043250924	76587432	T	A	0	GGGGACAAGGGATTGGTAGGGGTGGG	GGGGACAAGGGATTGGAAGGGGTGGG	1	1
SUGCT	chr7	40432042	40432065	rs1043272383	40432058	T	G	0	GGGTAGAGGGTAATGGGTGGGGGG	GGGTAGAGGGTAATGGGGGGGGGG	0	0
NFIX	chr19	13199997	13200022	rs1043312998	13200010	A	T	0	GGGCAGGGTGGGGGATGGGAGCTGGG	GGGCAGGGTGGGGGTTGGGAGCTGGG	0	0
ALPL	chr1	21885254	21885279	rs1043345078	21885258	G	C	0	GGGGAGGGGCGTGGGGTGTGCTTGGG	GGGGACGGGCGTGGGGTGTGCTTGGG	0	0
GABRG2	chr5	161495534	161495558	rs1043363117	161495541	G	C	0	GGGAGCTGGGGGGAGGGGCGGCGGG	GGGAGCTGCGGGGAGGGGCGGCGGG	0	0
EPHB2	chr1	23080405	23080427	rs1043394517	23080414	T	C	0	GGGAGGGTGCTGGGATTGCAGGG	GGGAGGGTGCCGGGATTGCAGGG	0	0
CACNA1C	chr12	2544703	2544726	rs1043429320	2544711	G	C	0	GGGCAGGGGGAAGGGTTGCCCGGG	GGGCAGGGGCAAGGGTTGCCCGGG	0	0
PTPRQ	chr12	80963169	80963190	rs1043448821	80963172	T	G	0	GGGGTGGGGGGAGGGGGGAGGG	GGGGGGGGGGGAGGGGGGAGGG	0	0
PTH1R	chr3	46924158	46924178	rs1043585384	46924173	G	C	0	GGGGGAGGGAGGGAGCGAGGG	GGGGGAGGGAGGGAGCCAGGG	0	0
JPH3	chr16	87635890	87635917	rs1043778324	87635894	C	T	0	GGGGGCCCCGGGGAAGCCCAGGGCGGGG	GGGGGTCCCGGGGAAGCCCAGGGCGGGG	0	0
CNTNAP2	chr7	147865655	147865676	rs1043813554	147865671	G	A	0	GGGGTGGGGGGAGGGGGGAGGG	GGGGTGGGGGGAGGGGGAAGGG	0	0
PLCB1	chr20	8797340	8797362	rs1043861413	8797354	G	A	0	GGGGGAGGGGACTGGGATTAGGG	GGGGGAGGGGACTGGAATTAGGG	1	1
CTDP1	chr18	77511180	77511196	rs1043946339	77511186	A	G	0	GGGAGGGAGGGGCTGGG	GGGAGGGGGGGGCTGGG	0	0
BCKDHB	chr6	80823815	80823838	rs1043982206	80823817	C	T	0	GGGCATGGGAAGTTGGGGTTGGGG	GGGTATGGGAAGTTGGGGTTGGGG	0	0
VSX2	chr14	74707806	74707831	rs1043995051	74707808	G	A	0	GGGGTGGGGCCCTCGCGGGTTTCGGG	GGGATGGGGCCCTCGCGGGTTTCGGG	0	0
RYR1	chr19	38979601	38979624	rs1043998294	38979614	G	A	0	GGGCTGTGTGGGTGGGACACAGGG	GGGCTGTGTGGGTGAGACACAGGG	1	1
NAT8L	chr4	2061434	2061461	rs1044036351	2061444	C	G	0	GGGGCGGGGGGCGCGGGGCCGCCGGGGG	GGGGCGGGGGGGGCGGGGCCGCCGGGGG	0	0
CYP2C19	chr10	96542717	96542738	rs1044041296	96542722	G	T	0	GGGGTGGAGGGCTTGGGGAGGG	GGGGTGTAGGGCTTGGGGAGGG	0	0
POLD1	chr19	50920975	50920996	rs1044072659	50920983	C	T	0	GGGAGGGGGCGGGTGGGCTGGG	GGGAGGGGGTGGGTGGGCTGGG	0	0
CFTR	chr7	117328102	117328131	rs10441349	117328107	G	A	0	GGGGCAGAGGGAGGGTGGGGCGGATATGGG	GGGGCAAAGGGAGGGTGGGGCGGATATGGG	0	0
CFTR	chr7	117328102	117328131	rs10441350	117328109	G	A	0	GGGGCAGAGGGAGGGTGGGGCGGATATGGG	GGGGCAGAAGGAGGGTGGGGCGGATATGGG	0	0
RYR1	chr19	38968997	38969024	rs1044185638	38969013	G	A	0	GGGAGCTTGGGGAAGGGGGTGTCCAGGG	GGGAGCTTGGGGAAGGGAGTGTCCAGGG	0	0
LEPR	chr1	65995226	65995252	rs1044204576	65995227	G	A	0	GGGAGGAAGGGAGGGAGGGAGGGAGGG	GGAAGGAAGGGAGGGAGGGAGGGAGGG	0	0
ATXN7	chr3	63980913	63980936	rs1044241576	63980927	G	A	0	GGGAACGGGGGCGTTGGGGGTGGG	GGGAACGGGGGCGTTAGGGGTGGG	0	0
SMAD3	chr15	67377888	67377911	rs1044289888	67377904	G	C	0	GGGGTTCAGGGTGGGCTGTGAGGG	GGGGTTCAGGGTGGGCTCTGAGGG	0	0
CACNB2	chr10	18779769	18779792	rs1044299142	18779775	T	G	0	GGGCCGGTGGGGGAGGGGGGAGGG	GGGCCGGGGGGGGAGGGGGGAGGG	0	0
SLC24A4	chr14	92907504	92907534	rs1044341436	92907508	G	A	0	GGGCTGCTCAGGGATACTTTGGGAGTTGGGG	GGGCTACTCAGGGATACTTTGGGAGTTGGGG	0	0
RARA	chr17	38500332	38500361	rs1044362997	38500346	G	A	0	GGGAGGAGGGGTGGAGTGGGTCTCGGGGGG	GGGAGGAGGGGTGGAATGGGTCTCGGGGGG	0	0
FAH	chr15	80450851	80450876	rs1044406604	80450872	A	G	0	GGGCTGTGTGGGCCCCCAAGGGAGGG	GGGCTGTGTGGGCCCCCAAGGGGGGG	0	0
MYO9B	chr19	17211904	17211923	rs1044469548	17211907	T	G	0	GGGGTGGGATGGGGGCTGGG	GGGGGGGGATGGGGGCTGGG	0	0
CTH	chr1	70893908	70893930	rs1044532159	70893928	G	A	0	GGGGAAGGGAGGGTGGAGGTGGG	GGGGAAGGGAGGGTGGAGGTGAG	0	0
PDE6B	chr4	655767	655794	rs1044535289	655778	G	T	0	GGGAAACGCAGGGATGGGGAAGATCGGG	GGGAAACGCAGGTATGGGGAAGATCGGG	0	0
TEAD1	chr11	12841563	12841587	rs1044605805	12841571	G	T	0	GGGCCTGGGGCAGGGAGTTGTGGGG	GGGCCTGGGTCAGGGAGTTGTGGGG	0	0
NTRK1	chr1	156809909	156809934	rs1044610243	156809912	T	G	0	GGGGTGGGGGCGGGGCTGGGTGAGGG	GGGGGGGGGGCGGGGCTGGGTGAGGG	0	0
PCNT	chr21	47790302	47790330	rs1044657592	47790318	G	T	0	GGGAGGTGCGGGGGTCGGGGAGGCTGGGG	GGGAGGTGCGGGGGTCGTGGAGGCTGGGG	0	0
JPH3	chr16	87656405	87656430	rs1044669203	87656410	C	T	0	GGGGAGCGTGGGCTGGGGCTGGGGGG	GGGGAGTGTGGGCTGGGGCTGGGGGG	0	0
BCAM	chr19	45315687	45315707	rs1044704849	45315689	A	G	0	GGGAGGGGCGCAGGGCAGGGG	GGGGGGGGCGCAGGGCAGGGG	0	0
CR2	chr1	207658534	207658554	rs1044772821	207658553	G	T	0	GGGTTGGGGGTTAGGGGAGGG	GGGTTGGGGGTTAGGGGAGGT	0	0
TCAP	chr17	37821299	37821320	rs1044798043	37821315	G	A	0	GGGGAGTGGGTGGGGCAGAGGG	GGGGAGTGGGTGGGGCAAAGGG	0	0
PTPN11	chr12	112920349	112920369	rs1044805881	112920367	G	C	0	GGGTGGGAGACTGGGATAGGG	GGGTGGGAGACTGGGATAGCG	1	1
CAMTA1	chr1	7746844	7746863	rs1044842260	7746855	G	T	0	GGGACAGGGTGGGTTTGGGG	GGGACAGGGTGGTTTTGGGG	1	1
CDH3	chr16	68744909	68744927	rs1044853566	68744915	G	A	0	GGGGAGGGGAGGGGAGGGG	GGGGAGGAGAGGGGAGGGG	0	0
COL4A3	chr2	228058516	228058531	rs1044887252	228058528	G	A	0	GGGGAGGGAGGGAGGG	GGGGAGGGAGGGAAGG	0	0
COCH	chr14	31343810	31343833	rs1044888634	31343814	G	A	0	GGGCGGCGGGCGCGGGTGCGAGGG	GGGCGACGGGCGCGGGTGCGAGGG	0	0
SFTPC	chr8	22017777	22017800	rs1044942037	22017794	A	T	0	GGGCAGGGCCCAGGTGGGAGGGGG	GGGCAGGGCCCAGGTGGGTGGGGG	0	0
NTRK1	chr1	156810334	156810359	rs1044957515	156810350	G	A	0	GGGGCAGGGCCTCTAGGGTGGGCGGG	GGGGCAGGGCCTCTAGGATGGGCGGG	0	0
FRAS1	chr4	79175995	79176016	rs1044965882	79175996	G	T	0	GGGCCTGGGAATGAAGGGTGGG	GGTCCTGGGAATGAAGGGTGGG	0	0
RTEL1	chr20	62323671	62323700	rs1044986604	62323699	G	A	0	GGGGCCTGGGCTGGCGAGGGCCTGGGTGGG	GGGGCCTGGGCTGGCGAGGGCCTGGGTGGA	0	0
DPP6	chr7	154447485	154447504	rs1044995657	154447500	G	A	0	GGGGGTGGGCAGGGCAGGGG	GGGGGTGGGCAGGGCAAGGG	0	0
CACNA1C	chr12	2307851	2307875	rs1045065887	2307856	T	G	0	GGGAGGTGGGGAGGGAGAGACAGGG	GGGAGGGGGGGAGGGAGAGACAGGG	1	1
IL10RA	chr11	117864231	117864255	rs1045109534	117864236	G	T	0	GGGAGGGTCTGGGATGGTGGGTGGG	GGGAGGTTCTGGGATGGTGGGTGGG	0	0
ROBO2	chr3	76852626	76852640	rs1045110453	76852638	G	T	0	GGGAGGGAGGGAGGG	GGGAGGGAGGGAGTG	0	0
EIF2B5	chr3	184260379	184260397	rs1045129711	184260395	G	A	0	GGGGGGGGGGGGGGCGGGG	GGGGGGGGGGGGGGCGGAG	0	0
KALRN	chr3	123831677	123831707	rs1045195168	123831703	A	G	0	GGGTTTTGGGGGAGGGTGGGGACAAGTAGGG	GGGTTTTGGGGGAGGGTGGGGACAAGTGGGG	1	1
CNTNAP2	chr7	147620192	147620214	rs1045213661	147620211	G	A	0	GGGAGGGGAGGGAAGGGGAGGGG	GGGAGGGGAGGGAAGGGGAGAGG	0	0
PDP1	chr8	94929726	94929754	rs1045268512	94929742	G	T	0	GGGCACCCCTGGGGCGGGGCCGGGCCGGG	GGGCACCCCTGGGGCGGTGCCGGGCCGGG	0	0
CDKN1B	chr12	12869831	12869858	rs1045516358	12869855	G	T	0	GGGGGCCGCTGGGGAGGGCCGAGCTGGG	GGGGGCCGCTGGGGAGGGCCGAGCTTGG	0	0
RNF213	chr17	78283140	78283167	rs1045546721	78283149	G	A	0	GGGTGTGGGGGGTGTCAGTGGGCCAGGG	GGGTGTGGGGAGTGTCAGTGGGCCAGGG	0	0
MRPS22	chr3	138847426	138847448	rs1045560761	138847446	G	A	0	GGGGAAGGAGGGTGGGAATAGGG	GGGGAAGGAGGGTGGGAATAGAG	0	0
TMEM165	chr4	56266028	56266049	rs1045639391	56266033	T	G	0	GGGGTATGGAGGGAAGGGTGGG	GGGGTAGGGAGGGAAGGGTGGG	0	0
OTOG	chr11	17623022	17623048	rs1045653034	17623035	T	G	0	GGGCGTGGGGGGAGTGGGGGAGGTGGG	GGGCGTGGGGGGAGGGGGGGAGGTGGG	0	0
PDGFRL	chr8	17462095	17462116	rs1045692510	17462097	G	A	0	GGGGTGGGGGGATGGGAGAGGG	GGGATGGGGGGATGGGAGAGGG	0	0
ESRRB	chr14	76912380	76912405	rs1045719505	76912388	A	G	0	GGGGGAGGGAAGAGGGGGAAGATGGG	GGGGGAGGGGAGAGGGGGAAGATGGG	0	0
TNNT3	chr11	1943266	1943283	rs1045812734	1943276	G	C	0	GGGAGGGAAATGGGGGGG	GGGAGGGAAATCGGGGGG	0	0
CACNA1H	chr16	1233089	1233112	rs1045863243	1233109	G	T	0	GGGACTGGGGTGGGACACGGTGGG	GGGACTGGGGTGGGACACGGTTGG	2	2
SMOC2	chr6	168860301	168860324	rs1045921302	168860304	T	G	0	GGGGTGGGTGGGCCCTGGGGTGGG	GGGGGGGGTGGGCCCTGGGGTGGG	0	0
LMNA	chr1	156052611	156052635	rs1045923011	156052616	G	T	0	GGGGGGGCCGGGGCCGGGGGCGGGG	GGGGGGTCCGGGGCCGGGGGCGGGG	0	0
MUC5B	chr11	1252879	1252900	rs1046086890	1252895	G	C	0	GGGCAGGGGACCGGGGAGGGGG	GGGCAGGGGACCGGGGACGGGG	1	1
MGME1	chr20	17971046	17971066	rs1046148682	17971063	G	T	0	GGGACATTGGGGGGGGGGGGG	GGGACATTGGGGGGGGGGTGG	1	1
ABHD5	chr3	43767867	43767894	rs1046273999	43767893	G	A	0	GGGGTAGGAGGGGCACCAGGGTCAGGGG	GGGGTAGGAGGGGCACCAGGGTCAGGGA	0	0
FAM20C	chr7	211684	211710	rs1046316751	211693	G	T	0	GGGCTAAGCGGGGAGGTGGGGGCCGGG	GGGCTAAGCGTGGAGGTGGGGGCCGGG	0	0
SERPINF1	chr17	1666393	1666415	rs1046344179	1666407	T	G	0	GGGGCTGGGTCACCATGGGTGGG	GGGGCTGGGTCACCAGGGGTGGG	0	0
ARHGEF10	chr8	1881708	1881734	rs1046378081	1881727	T	G	0	GGGATAGGCAGGGGGGCGGGTGGGGGG	GGGATAGGCAGGGGGGCGGGGGGGGGG	0	0
HTT	chr4	3229617	3229641	rs1046396188	3229620	A	G	0	GGGAAAGAGGGGTGGGGGTTAGGGG	GGGAGAGAGGGGTGGGGGTTAGGGG	0	0
SDCCAG8	chr1	243645987	243646014	rs1046469241	243645993	G	A	0	GGGCCGGGGAGCACAGGGGCTTCCTGGG	GGGCCGGAGAGCACAGGGGCTTCCTGGG	0	0
DTNA	chr18	32074329	32074359	rs1046558177	32074337	C	G	0	GGGGGGCGGCGGGGGCGGGTGGGCACGGGGG	GGGGGGCGGGGGGGGCGGGTGGGCACGGGGG	0	0
DAG1	chr3	49527229	49527251	rs1046569189	49527234	G	C	0	GGGAGGGCTTGGGACCTGGTGGG	GGGAGGCCTTGGGACCTGGTGGG	1	1
GCDH	chr19	13009711	13009736	rs1046591679	13009721	G	A	0	GGGCATGGGGTGTGGGATTCTCTGGG	GGGCATGGGGTATGGGATTCTCTGGG	0	0
CA4	chr17	58245894	58245912	rs1046632180	58245902	T	G	0	GGGAGGGGGTGGGGAAGGG	GGGAGGGGGGGGGGAAGGG	0	0
RPS19	chr19	42373283	42373303	rs1046652564	42373292	G	A	0	GGGTAAGCAGGGTAGGGGGGG	GGGTAAGCAGAGTAGGGGGGG	0	0
F10	chr13	113800715	113800743	rs1046660067	113800717	T	G	0	GGGTTTTGGAGGGGTTCCTGGGCTGGGGG	GGGGTTTGGAGGGGTTCCTGGGCTGGGGG	0	0
JPH3	chr16	87675847	87675878	rs1046701174	87675864	T	G	0	GGGAAAGGGGGGGGGCAGTGGGGAGTGGAGGG	GGGAAAGGGGGGGGGCAGGGGGGAGTGGAGGG	0	0
MYCN	chr2	16081900	16081914	rs1046736721	16081902	C	A	0	GGGCGGGAGGGAGGG	GGGAGGGAGGGAGGG	0	0
FOXP2	chr7	113773685	113773711	rs1046739097	113773705	A	T	0	GGGTGTTGGGAGGTGGGATCTAGTGGG	GGGTGTTGGGAGGTGGGATCTTGTGGG	0	0
CRADD	chr12	94079045	94079066	rs1046815759	94079060	T	C	0	GGGACTGGGAAGGGTATGAGGG	GGGACTGGGAAGGGTACGAGGG	1	1
LRP5	chr11	68203792	68203812	rs1046856105	68203802	T	G	0	GGGTGGGCGTCTGGGGAGGGG	GGGTGGGCGTCGGGGGAGGGG	0	0
DNAH11	chr7	21584866	21584887	rs1046874230	21584873	G	C	0	GGGGAAGGGAAGGGGATGGGGG	GGGGAAGGCAAGGGGATGGGGG	0	0
EIF2B5	chr3	184053086	184053104	rs1046912012	184053099	G	T	0	GGGCAGGGGGAAGGGGGGG	GGGCAGGGGGAAGGTGGGG	0	0
ST14	chr11	130067689	130067711	rs1046922095	130067705	T	G	0	GGGAGGTGGGTGGGTGCTGGGGG	GGGAGGTGGGTGGGTGCGGGGGG	0	0
F10	chr13	113800715	113800743	rs1046964278	113800729	T	G	0	GGGTTTTGGAGGGGTTCCTGGGCTGGGGG	GGGTTTTGGAGGGGTGCCTGGGCTGGGGG	0	0
IRF5	chr7	128579281	128579307	rs1047040313	128579305	G	A	0	GGGGCCTGGGGTGCTGGGGCTGAGGGG	GGGGCCTGGGGTGCTGGGGCTGAGGAG	0	0
ARHGEF10	chr8	1772178	1772210	rs1047076921	1772192	A	G	0	GGGGAACGGCGGGGGACGGCGGGGAACAGCGGG	GGGGAACGGCGGGGGGCGGCGGGGAACAGCGGG	1	1
CD4	chr12	6925586	6925603	rs1047133714	6925590	G	T	0	GGGAGGGGTGGGCAGGGG	GGGAGTGGTGGGCAGGGG	0	0
SH3BP2	chr4	2794881	2794912	rs1047148630	2794893	T	G	0	GGGTCTCGGCGGGTCTCGGGGGTCTCGCGGGG	GGGTCTCGGCGGGGCTCGGGGGTCTCGCGGGG	0	0
SYNE2	chr14	64536684	64536708	rs1047161720	64536706	G	A	0	GGGGTGGGCCAGGGGATTCGAGGGG	GGGGTGGGCCAGGGGATTCGAGGAG	0	0
PACRG	chr6	163596633	163596658	rs1047229662	163596649	T	A	0	GGGTGCATAAGGGGGAGTGGGGAGGG	GGGTGCATAAGGGGGAGAGGGGAGGG	0	0
ESRRB	chr14	76796295	76796326	rs1047237929	76796313	A	G	0	GGGGAGGTGTGGGTGGGGGAGGGAGGGAGGGG	GGGGAGGTGTGGGTGGGGGGGGGAGGGAGGGG	0	0
MYO7A	chr11	76925121	76925143	rs1047253566	76925126	G	A	0	GGGCCTGGGGTCGTGGGCAAGGG	GGGCCTAGGGTCGTGGGCAAGGG	0	0
B2M	chr15	45003959	45003988	rs1047306230	45003981	A	G	0	GGGAAGCGGCGGGGTGGCCTGGGAGTGGGG	GGGAAGCGGCGGGGTGGCCTGGGGGTGGGG	0	0
COMT	chr22	19930310	19930338	rs1047317357	19930326	G	C	0	GGGAGAGTGAGGGAGTGGGAAGGGGTGGG	GGGAGAGTGAGGGAGTGCGAAGGGGTGGG	0	0
MDM2	chr12	69202382	69202407	rs1047349095	69202383	G	A	0	GGGGGCTCGGGGCGCGGGGCGCGGGG	GGAGGCTCGGGGCGCGGGGCGCGGGG	0	0
FGF9	chr13	22249145	22249176	rs1047413523	22249165	G	C	0	GGGGGATGTGGGGGCTGGGGGGGATGTGGGGG	GGGGGATGTGGGGGCTGGGGGCGATGTGGGGG	0	0
COL4A2	chr13	111155151	111155175	rs1047434379	111155157	G	C	0	GGGTTGGGGGGAGAGGGACACGGGG	GGGTTGGCGGGAGAGGGACACGGGG	1	1
FCGR2B	chr1	161587169	161587197	rs1047477691	161587185	A	G	0	GGGGAGAGGGGGAGGGGAGGGGGAGGGGG	GGGGAGAGGGGGAGGGGGGGGGGAGGGGG	0	0
SPINT2	chr19	38747235	38747262	rs1047478921	38747261	G	A	0	GGGGGCTCCCGGGCCGGGATCCTGTGGG	GGGGGCTCCCGGGCCGGGATCCTGTGGA	0	0
GLIS2	chr16	4378536	4378563	rs1047529345	4378549	T	G	0	GGGATGCTGGGAGGTGTAGGGCTGGGGG	GGGATGCTGGGAGGGGTAGGGCTGGGGG	0	0
CCND1	chr11	69456849	69456873	rs1047557668	69456861	A	G	0	GGGAGCCCGCGGGAGGGGCGCAGGG	GGGAGCCCGCGGGGGGGGCGCAGGG	0	0
CNTNAP2	chr7	147997946	147997970	rs1047567953	147997965	T	G	0	GGGGCTGGGAGGAGGGACAATGGGG	GGGGCTGGGAGGAGGGACAAGGGGG	1	1
TBXAS1	chr7	139597132	139597154	rs1047658483	139597140	A	G	0	GGGGTGGGGAGGGGGACCGGGGG	GGGGTGGGGGGGGGGACCGGGGG	1	1
LRP5	chr11	68133181	68133212	rs1047659942	68133191	G	A	0	GGGACGGGACGGGGCGGGCGGGCGGGGCGGGG	GGGACGGGACGAGGCGGGCGGGCGGGGCGGGG	0	0
CPS1	chr2	211479597	211479626	rs1047700713	211479604	T	C	0	GGGGCCTGTCGGGGGGTGGGGAGGTAGGGG	GGGGCCTGCCGGGGGGTGGGGAGGTAGGGG	0	0
KCNQ1	chr11	2569253	2569281	rs1047745862	2569272	G	T	0	GGGCTTGGGGCGACTCTGGGGAGTTAGGG	GGGCTTGGGGCGACTCTGGGTAGTTAGGG	0	0
DCC	chr18	49868825	49868845	rs1047765109	49868833	T	G	0	GGGTGGGGGTGGGGGGGTGGG	GGGTGGGGGGGGGGGGGTGGG	0	0
ALG1	chr16	5134631	5134653	rs1047793	5134652	G	T	0	GGGAGTTAGGGACTTGGGAGGGG	GGGAGTTAGGGACTTGGGAGGGT	1	1
PACRG	chr6	163590768	163590789	rs1047796752	163590776	G	T	0	GGGCAGGCTGGGCGGGGAGGGG	GGGCAGGCTTGGCGGGGAGGGG	0	0
ALG1	chr16	5134631	5134653	rs1047803	5134640	G	A	0	GGGAGTTAGGGACTTGGGAGGGG	GGGAGTTAGGAACTTGGGAGGGG	1	1
ADCK3	chr1	227134093	227134114	rs1047805377	227134109	G	A	0	GGGTGTTGGGCGGGGCCGGGGG	GGGTGTTGGGCGGGGCCAGGGG	0	0
ALG1	chr16	5134631	5134653	rs1047809	5134635	T	C	0	GGGAGTTAGGGACTTGGGAGGGG	GGGAGCTAGGGACTTGGGAGGGG	1	1
COL4A2	chr13	111060568	111060599	rs1047889952	111060579	G	A	0	GGGGCCACAAGGGTCCCCAGGGCGGGGAGGGG	GGGGCCACAAGGATCCCCAGGGCGGGGAGGGG	0	0
OSMR	chr5	38863291	38863319	rs1047937314	38863305	G	A	0	GGGAGAGGGGGAGGGGGAGGGGGAGGGGG	GGGAGAGGGGGAGGGAGAGGGGGAGGGGG	0	0
DNMT3B	chr20	31385115	31385141	rs1047955295	31385126	G	A	0	GGGCCCTGTGGGGTGGATGTGGGTGGG	GGGCCCTGTGGGATGGATGTGGGTGGG	0	0
WFS1	chr4	6294036	6294058	rs1048012824	6294040	T	G	0	GGGGGTGGGGACTGGCGGGGGGG	GGGGGGGGGGACTGGCGGGGGGG	1	1
WWOX	chr16	78283729	78283752	rs1048026225	78283732	T	G	0	GGGGTGGGGGCTGGGGGCTGGGGG	GGGGGGGGGGCTGGGGGCTGGGGG	0	0
RAI1	chr17	17589615	17589643	rs1048066747	17589630	T	G	0	GGGGTGAGGGGCTTGGTGGGGTCGGGGGG	GGGGTGAGGGGCTTGGGGGGGTCGGGGGG	0	0
EIF2B5	chr3	184277439	184277466	rs1048089485	184277444	T	C	0	GGGGCATGGGGGACTGCAGGGCAAGGGG	GGGGCACGGGGGACTGCAGGGCAAGGGG	1	1
DSP	chr6	7542342	7542370	rs1048109675	7542356	C	A	0	GGGCTGCGGGGCTCGCGGGACAGGGAGGG	GGGCTGCGGGGCTCGAGGGACAGGGAGGG	1	1
EPHB2	chr1	23193818	23193841	rs1048150840	23193827	G	A	0	GGGCCTTGGGGACAGGGGTAGGGG	GGGCCTTGGGAACAGGGGTAGGGG	1	1
TCF7L2	chr10	114852626	114852647	rs1048239830	114852629	G	A	0	GGGGGGGTTGGTGGGGGCAGGG	GGGGAGGTTGGTGGGGGCAGGG	0	0
ZBTB38	chr3	141045243	141045269	rs1048323706	141045244	G	C	0	GGGGGTTGCAGGGGAGCAGGGTGGGGG	GGCGGTTGCAGGGGAGCAGGGTGGGGG	0	0
TNNI2	chr11	1860786	1860804	rs1048348266	1860798	A	G	0	GGGGGTGGGCGGGAGGGGG	GGGGGTGGGCGGGGGGGGG	0	0
GJC2	chr1	228343740	228343763	rs1048350416	228343747	T	G	0	GGGTCAGGTGGGGAGGGAGGTGGG	GGGTCAGGGGGGGAGGGAGGTGGG	0	0
JPH3	chr16	87638528	87638549	rs1048555425	87638531	C	T	0	GGGGCGCTGAGGGCCGGGCGGG	GGGGTGCTGAGGGCCGGGCGGG	0	0
KCTD7	chr7	66165488	66165512	rs1048564483	66165498	A	G	0	GGGGAGGGGAAAGGGGAGTTGGGGG	GGGGAGGGGAAGGGGGAGTTGGGGG	0	0
MUC5B	chr11	1254963	1254987	rs1048583777	1254978	G	A	0	GGGGGTGGGGTCTGCGGGGTGAGGG	GGGGGTGGGGTCTGCGAGGTGAGGG	0	0
MAP2K1	chr15	66770047	66770070	rs1048613422	66770062	G	A	0	GGGAGAGTGTGGGCCGGGTGAGGG	GGGAGAGTGTGGGCCGAGTGAGGG	0	0
CAMTA1	chr1	6845723	6845748	rs1048641492	6845724	G	C	0	GGGCGGGAGCGCGGGGGCGCGGCGGG	GGCCGGGAGCGCGGGGGCGCGGCGGG	0	0
BMPR1B	chr4	95738883	95738902	rs1048652482	95738889	G	A	0	GGGTCAGGGTGTGGGAAGGG	GGGTCAGAGTGTGGGAAGGG	0	0
PAX9	chr14	37131359	37131387	rs1048668254	37131373	A	G	0	GGGAGGGAGGGAGGGAGGGAGCGCGAGGG	GGGAGGGAGGGAGGGGGGGAGCGCGAGGG	0	0
SMOC2	chr6	169004005	169004032	rs1048713146	169004008	G	T	0	GGGTGTCATAGGGGTGGGGCAGATGGGG	GGGTTTCATAGGGGTGGGGCAGATGGGG	0	0
SERPING1	chr11	57365644	57365669	rs1048798650	57365663	G	A	0	GGGGGCGGGCCCCGGGCGGGGTGGGG	GGGGGCGGGCCCCGGGCGGGATGGGG	0	0
LDLR	chr19	11200451	11200478	rs1048852718	11200465	C	T	0	GGGCGCTGAGGGGAGCGCGAGGGTCGGG	GGGCGCTGAGGGGAGTGCGAGGGTCGGG	0	0
SUGCT	chr7	40226885	40226906	rs1048861090	40226898	G	T	0	GGGGTGTGGGGAGTGGGGAGGG	GGGGTGTGGGGAGTTGGGAGGG	0	0
GRM1	chr6	146588786	146588818	rs1048904058	146588800	G	C	0	GGGCTGGGCTGGGCTGGGCTGGGCTGGGCTGGG	GGGCTGGGCTGGGCTCGGCTGGGCTGGGCTGGG	0	0
PABPN1	chr14	23790711	23790738	rs104894466	23790712	G	C	0	GGGGGCTGCGGGCGGTCGGGGCTCCGGG	GGCGGCTGCGGGCGGTCGGGGCTCCGGG	0	0
ITGA3	chr17	48148586	48148612	rs1048953480	48148596	G	A	0	GGGCAAGAGAGGGAATAGGGAGATGGG	GGGCAAGAGAGAGAATAGGGAGATGGG	0	0
PLCG2	chr16	81971975	81971995	rs1048998705	81971994	G	A	0	GGGCGGGCGGGTGGTAGGGGG	GGGCGGGCGGGTGGTAGGGGA	0	0
COL9A3	chr20	61458118	61458148	rs1049049608	61458127	G	A	0	GGGTCCCATTGGGTTCCGAGGGCCGCCTGGG	GGGTCCCATTAGGTTCCGAGGGCCGCCTGGG	0	0
CD81	chr11	2400671	2400692	rs1049078898	2400675	T	G	0	GGGGGTGGGGGTTGAGGGAGGG	GGGGGGGGGGGTTGAGGGAGGG	0	0
VPS13B	chr8	100784678	100784703	rs1049105201	100784683	G	A	0	GGGGCTGTGGGGAGGGGAGAGTAGGG	GGGGCTATGGGGAGGGGAGAGTAGGG	0	0
SMARCB1	chr22	24165430	24165454	rs1049149059	24165433	A	G	0	GGGCAGGGAGGGCTTGCTGGGTGGG	GGGCGGGGAGGGCTTGCTGGGTGGG	0	0
PNPLA6	chr19	7616031	7616056	rs1049186686	7616047	G	T	0	GGGACTCCGGGGGGGTGGGGGCCGGG	GGGACTCCGGGGGGGTGTGGGCCGGG	1	1
ARHGEF10	chr8	1789753	1789776	rs1049231686	1789773	G	C	0	GGGGGCAGGGAGTAGGGAGCAGGG	GGGGGCAGGGAGTAGGGAGCACGG	0	0
ATP8A2	chr13	26088122	26088148	rs1049241425	26088132	A	G	0	GGGGGAGGGGGAGGGGGAGGGAGAGGG	GGGGGAGGGGGGGGGGGAGGGAGAGGG	0	0
JPH3	chr16	87721443	87721467	rs1049279690	87721464	G	T	0	GGGCGCCATCGGGGGATGGGGGGGG	GGGCGCCATCGGGGGATGGGGGTGG	0	0
ITGA3	chr17	48149901	48149922	rs1049312831	48149912	T	G	0	GGGGGAGTGGGGTGGGGTGGGG	GGGGGAGTGGGGGGGGGTGGGG	0	0
NOL3	chr16	67208378	67208403	rs1049423228	67208399	A	G	0	GGGGCGGGGCCTAGGGCAGAGCAGGG	GGGGCGGGGCCTAGGGCAGAGCGGGG	0	0
PACRG	chr6	163267160	163267185	rs1049425854	163267173	G	T	0	GGGGAGCTGGGCAGGGCTGTCAGGGG	GGGGAGCTGGGCAGTGCTGTCAGGGG	0	0
PCCB	chr3	135995413	135995440	rs1049514252	135995424	G	A	0	GGGCCAGGGCGGGGGTGGGGGTTGGGGG	GGGCCAGGGCGGAGGTGGGGGTTGGGGG	0	0
ACADVL	chr17	7125198	7125221	rs1049541174	7125199	G	C	0	GGGATGGGGAAGTGGGCCGAGGGG	GGCATGGGGAAGTGGGCCGAGGGG	0	0
PACRG	chr6	163535723	163535748	rs1049552254	163535737	G	C	0	GGGGCTGTGGGGTGGGAGAAATAGGG	GGGGCTGTGGGGTGGCAGAAATAGGG	0	0
FIP1L1	chr4	55023762	55023785	rs1049554703	55023781	A	G	0	GGGAAGGAAGGGAGGGAGGGAGGG	GGGAAGGAAGGGAGGGAGGGGGGG	0	0
SKIV2L	chr6	31931113	31931133	rs1049634300	31931128	T	G	0	GGGGTAGGGAAGGGGGTGGGG	GGGGTAGGGAAGGGGGGGGGG	0	0
CDH15	chr16	89256980	89257007	rs1049729877	89257000	G	A	0	GGGCTCTGAGGGTCAGAGGGTGTAGGGG	GGGCTCTGAGGGTCAGAGGGTATAGGGG	0	0
ALMS1	chr2	73771493	73771514	rs1049761794	73771500	G	T	0	GGGGTGGGGGAAGCGGGGAGGG	GGGGTGGGTGAAGCGGGGAGGG	0	0
FIP1L1	chr4	54767763	54767791	rs1049873872	54767768	A	G	0	GGGGGAAGGGAAGGGGAGGGGAGAAAGGG	GGGGGAGGGGAAGGGGAGGGGAGAAAGGG	0	0
EIF2B5	chr3	183873097	183873121	rs1049892900	183873116	C	G	0	GGGGGCGGGGCGCGCCGGGGCGGGG	GGGGGCGGGGCGCGCCGGGGGGGGG	0	0
LRP5	chr11	68131453	68131479	rs1049917024	68131458	A	G	0	GGGGGGAGCGGGGGCGCGGGGCAGGGG	GGGGGGGGCGGGGGCGCGGGGCAGGGG	0	0
PLCG2	chr16	81872204	81872231	rs1049918934	81872214	G	T	0	GGGCCTGTCAGGGGGTGGGGGCAAGGGG	GGGCCTGTCAGTGGGTGGGGGCAAGGGG	0	0
VPS13B	chr8	100556542	100556563	rs1049985180	100556561	G	C	0	GGGGTGGGGGTCAGGGGGAGGG	GGGGTGGGGGTCAGGGGGAGCG	0	0
SH3BP2	chr4	2810363	2810387	rs1050021945	2810376	G	C	0	GGGAGAGCCTGGGAGGGTCCCAGGG	GGGAGAGCCTGGGACGGTCCCAGGG	0	0
COL18A1	chr21	46831014	46831037	rs1050038252	46831036	G	A	0	GGGAGGGGCATGGGAGAGACAGGG	GGGAGGGGCATGGGAGAGACAGGA	1	1
CFD	chr19	862136	862163	rs1050047040	862146	A	T	0	GGGGGCGGGGCATGTGGGTAGGGTGGGG	GGGGGCGGGGCTTGTGGGTAGGGTGGGG	0	0
CACNA1C	chr12	2313960	2313981	rs1050096168	2313969	G	T	0	GGGGTTGGGGGAGGGGGGAGGG	GGGGTTGGGGTAGGGGGGAGGG	0	0
UPK3A	chr22	45681444	45681469	rs1050119451	45681449	G	A	0	GGGGGCGCTGGGGGACCATGGGAGGG	GGGGGCACTGGGGGACCATGGGAGGG	1	1
LIPC	chr15	58733314	58733337	rs1050131266	58733335	G	A	0	GGGCAGGGGTGGGGCCCAGCAGGG	GGGCAGGGGTGGGGCCCAGCAGAG	0	0
CEACAM16	chr19	45213675	45213700	rs1050162329	45213681	G	T	0	GGGCAGGGGAGCAGAAGGGGTGGGGG	GGGCAGGTGAGCAGAAGGGGTGGGGG	0	0
BLK	chr8	11417762	11417776	rs1050166468	11417772	T	G	0	GGGTGGGTGGGTGGG	GGGTGGGTGGGGGGG	0	0
CAMTA1	chr1	7752043	7752065	rs1050169793	7752048	G	A	0	GGGAGGGAGGGAGGGAAGGAGGG	GGGAGGAAGGGAGGGAAGGAGGG	0	0
ASXL1	chr20	30946991	30947015	rs1050194762	30947014	G	A	0	GGGGGAGTTGGGTTTCCGGGAAGGG	GGGGGAGTTGGGTTTCCGGGAAGGA	0	0
GPR98	chr5	90271521	90271542	rs1050200227	90271525	C	T	0	GGGGTCGAGGGAGGGGTTAGGG	GGGGTTGAGGGAGGGGTTAGGG	0	0
FAM20C	chr7	197817	197847	rs1050232257	197825	T	A	0	GGGAGAGTGTGGGGCCCCCTGGGACCTGGGG	GGGAGAGTGAGGGGCCCCCTGGGACCTGGGG	1	1
CACNA1H	chr16	1209686	1209718	rs1050256064	1209713	C	G	0	GGGGCTGGAAGGGCAGGTGAGGGCCGCACAGGG	GGGGCTGGAAGGGCAGGTGAGGGCCGCAGAGGG	0	0
SQSTM1	chr5	179261237	179261255	rs1050369984	179261246	G	C	0	GGGGGGGTGGGGGGTGGGG	GGGGGGGTGGCGGGTGGGG	0	0
MYO15A	chr17	18041362	18041380	rs1050406644	18041376	T	G	0	GGGAGGGAGGGTGGGTGGG	GGGAGGGAGGGTGGGGGGG	0	0
TRPM4	chr19	49703727	49703751	rs1050439913	49703737	G	A	0	GGGAAAGGGGTGGGGCCAGGGAGGG	GGGAAAGGGGTAGGGCCAGGGAGGG	0	0
CDC73	chr1	193091554	193091581	rs1050458300	193091568	C	G	0	GGGGATGGGATAAAACGGGTGTTCGGGG	GGGGATGGGATAAAAGGGGTGTTCGGGG	0	0
SUGCT	chr7	40432042	40432065	rs1050468808	40432063	G	T	0	GGGTAGAGGGTAATGGGTGGGGGG	GGGTAGAGGGTAATGGGTGGGGTG	0	0
TAB2	chr6	149638972	149638997	rs1050483318	149638983	G	A	0	GGGGCTGAGCGGGGAGGGAGGGAGGG	GGGGCTGAGCGGAGAGGGAGGGAGGG	0	0
ARID1B	chr6	157176150	157176172	rs1050498203	157176160	G	C	0	GGGGCAGTTGGGGTTGGGATGGG	GGGGCAGTTGGCGTTGGGATGGG	0	0
BMP1	chr8	22062586	22062612	rs1050551667	22062593	G	A	0	GGGCAGCAGGGTAGCAGGGTAGGTGGG	GGGCAGCAAGGTAGCAGGGTAGGTGGG	0	0
PLCG2	chr16	81876573	81876595	rs1050576832	81876577	T	G	0	GGGGGTGGGAGTGGAGGGATGGG	GGGGGGGGGAGTGGAGGGATGGG	0	0
LAMA2	chr6	129540973	129540991	rs1050621278	129540990	G	C	0	GGGGTGGGGGGGAGGGGGG	GGGGTGGGGGGGAGGGGGC	0	0
RP1	chr8	55530818	55530841	rs1050687194	55530829	A	C	0	GGGCTGGGTAGCAGTGGGATAGGG	GGGCTGGGTAGCCGTGGGATAGGG	0	0
WDR62	chr19	36560898	36560923	rs1050700397	36560921	G	A	0	GGGAGAGGGAGACCGTGGGGAGAGGG	GGGAGAGGGAGACCGTGGGGAGAGAG	1	1
SH3BP2	chr4	2812072	2812096	rs1050704775	2812076	G	A	0	GGGCTGTGGGGGGAATGGGCCTGGG	GGGCTATGGGGGGAATGGGCCTGGG	0	0
ATP8A2	chr13	26055292	26055317	rs1050750460	26055294	A	T	0	GGGAGAGGGAGACCGTGGGGAGAGGG	GGGTGAGGGAGACCGTGGGGAGAGGG	1	1
IRF5	chr7	128579087	128579115	rs1050783323	128579093	G	A	0	GGGAGGGGTGGGGGCGGAGGGGAGGGGGG	GGGAGGGATGGGGGCGGAGGGGAGGGGGG	0	0
DPP6	chr7	154655671	154655699	rs1050792331	154655679	C	T	0	GGGAGGGGGCGAGGTGGGGCAGAGAGGGG	GGGAGGGGGTGAGGTGGGGCAGAGAGGGG	0	0
TWIST2	chr2	239775886	239775912	rs1050793458	239775894	A	C	0	GGGAGAGGGAGGCAGGGAGGGAGGGGG	GGGAGAGGGCGGCAGGGAGGGAGGGGG	0	0
COL4A2	chr13	111116611	111116632	rs1050918162	111116630	G	A	0	GGGTTAGGGGTAGGGGTGAGGG	GGGTTAGGGGTAGGGGTGAGAG	0	0
MEGF8	chr19	42841025	42841053	rs1050935063	42841049	A	G	0	GGGGCGGGATGGGCTTCAGGGCCCAAGGG	GGGGCGGGATGGGCTTCAGGGCCCAGGGG	0	0
RUNX2	chr6	45532390	45532408	rs1050947882	45532395	G	T	0	GGGCTGGGATCGGGGTGGG	GGGCTGTGATCGGGGTGGG	0	0
PLCG2	chr16	81971678	81971709	rs1050971104	81971697	G	A	0	GGGTCGTTCTGGGAGAAGAGGGAAGAGAGGGG	GGGTCGTTCTGGGAGAAGAGAGAAGAGAGGGG	0	0
DDHD2	chr8	38126351	38126373	rs1051002960	38126370	G	A	0	GGGAAGCCGGGTCATGGGGAGGG	GGGAAGCCGGGTCATGGGGAAGG	0	0
TBC1D24	chr16	2548046	2548068	rs1051017730	2548064	T	C	0	GGGTGGGAGGTGGGGCTCCTGGG	GGGTGGGAGGTGGGGCTCCCGGG	0	0
CFD	chr19	862464	862486	rs1051082204	862472	G	A	0	GGGTGGGAGGTATAGGGGGCGGG	GGGTGGGAGATATAGGGGGCGGG	0	0
CNTNAP2	chr7	147080701	147080728	rs1051087398	147080721	C	A	0	GGGGCCTGTCGGGGTGGGGAGCAAGGGG	GGGGCCTGTCGGGGTGGGGAGAAAGGGG	0	0
CHMP2B	chr3	87297904	87297925	rs1051107275	87297917	A	T	0	GGGGGTGGGGAGGGATGGGGGG	GGGGGTGGGGAGGGTTGGGGGG	0	0
FGF9	chr13	22249145	22249176	rs1051228083	22249170	T	G	0	GGGGGATGTGGGGGCTGGGGGGGATGTGGGGG	GGGGGATGTGGGGGCTGGGGGGGATGGGGGGG	0	0
PAX7	chr1	18966476	18966503	rs1051256383	18966482	G	T	0	GGGGACGGGGCGGGGGGGAAATCCTGGG	GGGGACGTGGCGGGGGGGAAATCCTGGG	0	0
AGRN	chr1	960565	960586	rs1051355600	960570	G	T	0	GGGACAGGGCAGGGGGCCAGGG	GGGACATGGCAGGGGGCCAGGG	1	1
RUNX2	chr6	45575120	45575143	rs1051364495	45575134	G	A	0	GGGATGAAGCGGGAGGTGGGAGGG	GGGATGAAGCGGGAGATGGGAGGG	0	0
AQP1	chr7	30953092	30953115	rs1051422694	30953094	G	T	0	GGGGCTGTGGGCAGGGCATGTGGG	GGGTCTGTGGGCAGGGCATGTGGG	0	0
CLCN1	chr7	143036005	143036032	rs1051457475	143036021	G	T	0	GGGTACAATGGGCTGGGGCTCTTTTGGG	GGGTACAATGGGCTGGGTCTCTTTTGGG	0	0
SEPT9	chr17	75494480	75494502	rs1051504983	75494486	G	T	0	GGGATGGGGAGTGGGGGTGGGGG	GGGATGGTGAGTGGGGGTGGGGG	0	0
SMARCAL1	chr2	217277870	217277893	rs1051517003	217277874	A	G	0	GGGGGAGGGGGGAGGGGGGTTGGG	GGGGGGGGGGGGAGGGGGGTTGGG	0	0
MXI1	chr10	111986298	111986321	rs1051589052	111986310	T	G	0	GGGGAGGGGCGTGTGAGGGAGGGG	GGGGAGGGGCGTGGGAGGGAGGGG	0	0
GPD1L	chr3	32202046	32202065	rs1051601355	32202052	T	G	0	GGGTGGGTGGGTGGGATGGG	GGGTGGGGGGGTGGGATGGG	0	0
FAH	chr15	80445174	80445202	rs1051611728	80445192	A	G	0	GGGGGTCAGGGTAGGGGGGAGGGGCAGGG	GGGGGTCAGGGTAGGGGGGGGGGGCAGGG	0	0
ENO3	chr17	4853356	4853380	rs1051614788	4853371	G	C	0	GGGCCGGCGGGGCGGGGAGCAGGGG	GGGCCGGCGGGGCGGGCAGCAGGGG	0	0
EIF2B5	chr3	183993987	183994012	rs1051634691	183994004	G	A	0	GGGGGCCCCGGGCTCCACGGGAGGGG	GGGGGCCCCGGGCTCCACAGGAGGGG	0	0
ORAI1	chr12	122072636	122072656	rs1051833682	122072643	G	A	0	GGGGGAGGGAGAGGGAGAGGG	GGGGGAGGAAGAGGGAGAGGG	0	0
FGGY	chr1	60205135	60205162	rs1051834566	60205158	G	A	0	GGGTAGTGAGGGGTGCAGGGGTATGGGG	GGGTAGTGAGGGGTGCAGGGGTATAGGG	0	0
EIF2B5	chr3	184319822	184319849	rs1051871185	184319833	G	T	0	GGGGAGCCCCGGGGCTGGGGCCCGCGGG	GGGGAGCCCCGGTGCTGGGGCCCGCGGG	0	0
PNKD	chr2	219150741	219150765	rs1051873463	219150758	G	A	0	GGGTAAGGGAAGGAGGGAGAAGGGG	GGGTAAGGGAAGGAGGGAAAAGGGG	0	0
ESRRB	chr14	76898895	76898919	rs1051949804	76898904	G	T	0	GGGTGGGTTTGGGGGGTAAAGAGGG	GGGTGGGTTTTGGGGGTAAAGAGGG	0	0
IL6R	chr1	154395990	154396015	rs1051981998	154395994	G	C	0	GGGCTGAGTGGGTGGGAGGGAAGGGG	GGGCTCAGTGGGTGGGAGGGAAGGGG	0	0
SYNE2	chr14	64600337	64600361	rs1052020699	64600355	C	T	0	GGGGTTTGGTGGGCTTGGGCGTGGG	GGGGTTTGGTGGGCTTGGGTGTGGG	0	0
FANCD2	chr3	10103655	10103675	rs1052203191	10103657	G	T	0	GGGGTGGGGGAGGGGGGAGGG	GGGTTGGGGGAGGGGGGAGGG	0	0
SH3BP2	chr4	2819939	2819965	rs1052275432	2819964	G	A	0	GGGCCGGCGGGCATGGCGGGCTCCGGG	GGGCCGGCGGGCATGGCGGGCTCCGGA	0	0
CACNA1H	chr16	1204154	1204178	rs1052336679	1204167	G	A	0	GGGCCGGGCGCGCGGGGGTGCAGGG	GGGCCGGGCGCGCGAGGGTGCAGGG	0	0
CAMTA1	chr1	7722965	7722989	rs1052371642	7722979	G	A	0	GGGAAGTTGGGGAGGGGAGGTGGGG	GGGAAGTTGGGGAGGAGAGGTGGGG	0	0
﻿CFTR	chr7	117119807	117119834	rs1052452183	117119822	G	C	0	GGGAAAGGGAGGTGCGGGGCGGCGAGGG	GGGAAAGGGAGGTGCGCGGCGGCGAGGG	0	0
KCNQ1	chr11	2534577	2534602	rs1052488033	2534582	C	T	0	GGGACCCATGGGACTTGAGGGTGGGG	GGGACCTATGGGACTTGAGGGTGGGG	2	2
CACNA1H	chr16	1261379	1261401	rs1052495745	1261387	A	G	0	GGGACGGGGAGGGACAGCTCGGG	GGGACGGGGGGGGACAGCTCGGG	1	1
LPL	chr8	19796336	19796358	rs1052570993	19796345	A	T	0	GGGGGTGGGGATGGGGTGCGGGG	GGGGGTGGGGTTGGGGTGCGGGG	0	0
NDUFAF6	chr8	96105342	96105368	rs1052698861	96105363	A	G	0	GGGAGTGTAAGGGGTGGGTGGGAGGGG	GGGAGTGTAAGGGGTGGGTGGGGGGGG	0	0
CDH23	chr10	73388082	73388102	rs1052736608	73388098	A	G	0	GGGATGGGGCTGGGCACAGGG	GGGATGGGGCTGGGCACGGGG	0	0
TSHR	chr14	81421678	81421702	rs1052840133	81421694	T	G	0	GGGAGGGGCGCCCGGGGTGGGGGGG	GGGAGGGGCGCCCGGGGGGGGGGGG	0	0
EVC	chr4	5763223	5763251	rs1052857758	5763239	T	G	0	GGGGGGCGGGGGGTGGTTGGGGGGTGGGG	GGGGGGCGGGGGGTGGTGGGGGGGTGGGG	0	0
GNAS	chr20	57467617	57467643	rs1052860948	57467631	A	G	0	GGGAGGGGGGCGGCGAGGGGAGGAGGG	GGGAGGGGGGCGGCGGGGGGAGGAGGG	0	0
UVSSA	chr4	1378690	1378713	rs1052976006	1378693	G	A	0	GGGTGGGGCAGGGGCGCTGGTGGG	GGGTAGGGCAGGGGCGCTGGTGGG	0	0
PLOD1	chr1	12031041	12031068	rs1052986474	12031058	T	G	0	GGGACTGAGGGGTGGGGATGGGGTTGGG	GGGACTGAGGGGTGGGGAGGGGGTTGGG	1	1
CNGA3	chr2	98999748	98999770	rs1053095757	98999758	T	C	0	GGGATAGGGATTGGGGGGTGGGG	GGGATAGGGATCGGGGGGTGGGG	0	0
FIP1L1	chr4	54768015	54768043	rs1053119862	54768034	A	G	0	GGGAGGGAGGGACAAAGGGAAGGGAAGGG	GGGAGGGAGGGACAAAGGGAGGGGAAGGG	1	1
ACTN4	chr19	39184771	39184799	rs1053223049	39184784	C	T	0	GGGCCAGGGACAGGCTGGGAGGAGCGGGG	GGGCCAGGGACAGGTTGGGAGGAGCGGGG	1	1
FOXP2	chr7	114117555	114117574	rs1053299957	114117567	G	A	0	GGGAGGGAAGTGGGTGTGGG	GGGAGGGAAGTGGATGTGGG	0	0
CD2AP	chr6	47518756	47518785	rs1053310126	47518763	G	A	0	GGGGCCTCGGGGGAAGAGGGTGGGAAGGGG	GGGGCCTCAGGGGAAGAGGGTGGGAAGGGG	0	0
CNTN1	chr12	41252781	41252799	rs1053356638	41252787	G	A	0	GGGTGGGGTTGGGGGAGGG	GGGTGGGATTGGGGGAGGG	0	0
CRELD1	chr3	9982408	9982435	rs1053397974	9982431	A	G	0	GGGGGAGGGGGAGGGGAGGGGGGGAGGG	GGGGGAGGGGGAGGGGAGGGGGGGGGGG	0	0
NFIX	chr19	13113518	13113539	rs1053455104	13113532	T	G	0	GGGAGGGGAGGCGGGTAGCGGG	GGGAGGGGAGGCGGGGAGCGGG	0	0
HTT	chr4	3238361	3238388	rs1053544661	3238386	G	T	0	GGGAGCCCACGGGGCTGTGGGAGGGGGG	GGGAGCCCACGGGGCTGTGGGAGGGGTG	0	0
CACNA1H	chr16	1207202	1207227	rs1053561264	1207208	G	A	0	GGGAGGCGGGCTGTGGGTGTGTAGGG	GGGAGGCAGGCTGTGGGTGTGTAGGG	0	0
TCF7L2	chr10	114712176	114712206	rs1053608223	114712181	T	G	0	GGGCTCTCCCGGGCCGCGCAGGGCAGCAGGG	GGGCTCGCCCGGGCCGCGCAGGGCAGCAGGG	0	0
COL18A1	chr21	46825678	46825704	rs1053614565	46825690	G	T	0	GGGAGGGCTCGGGGCGGGGCCGCGGGG	GGGAGGGCTCGGGTCGGGGCCGCGGGG	0	0
IDUA	chr4	996985	997011	rs1053623115	996999	T	G	0	GGGGTCCCGGGGGGGTGGGGTCCGGGG	GGGGTCCCGGGGGGGGGGGGTCCGGGG	0	0
IFNAR2	chr21	34616882	34616903	rs1053665609	34616897	T	G	0	GGGGAGGGAGAATGGGTAGGGG	GGGGAGGGAGAATGGGGAGGGG	0	0
KCNQ1	chr11	2588260	2588290	rs1053743053	2588288	G	A	0	GGGTGCCCCAGGGAATGGGGGGCACCTGGGG	GGGTGCCCCAGGGAATGGGGGGCACCTGGAG	0	0
C10orf11	chr10	77511071	77511094	rs1053777382	77511091	G	T	0	GGGAGAGGGAGAGGGAGACCGGGG	GGGAGAGGGAGAGGGAGACCGTGG	1	1
EVC	chr4	5732854	5732881	rs1053839710	5732879	G	A	0	GGGAGGAGGGTGCGCTGGGTGTCCGGGG	GGGAGGAGGGTGCGCTGGGTGTCCGGAG	0	0
DISC1	chr1	232119319	232119340	rs1053857849	232119321	A	G	0	GGGAGGGAGGTAGTGGGTGGGG	GGGGGGGAGGTAGTGGGTGGGG	0	0
SUGCT	chr7	40854776	40854801	rs1053971190	40854780	T	G	0	GGGGTTGGGGGCCAAGATGGGCAGGG	GGGGTGGGGGGCCAAGATGGGCAGGG	0	0
CAPN10	chr2	241538629	241538652	rs1053975149	241538636	G	C	0	GGGGCTGGGGGCCTGGGAGGTGGG	GGGGCTGGCGGCCTGGGAGGTGGG	0	0
ST14	chr11	130079503	130079528	rs1054025137	130079505	C	T	0	GGGCCCCGGGAGAGGCGGGACTGGGG	GGGTCCCGGGAGAGGCGGGACTGGGG	1	1
BLK	chr8	11417650	11417676	rs1054098802	11417659	G	A	0	GGGTGGGTGGGTGGGTGGGTGGGTGGG	GGGTGGGTGGATGGGTGGGTGGGTGGG	0	0
TSC2	chr16	2117852	2117878	rs1054102651	2117875	G	A	0	GGGAAGGGGTGTGCTGGGCTGTGGGGG	GGGAAGGGGTGTGCTGGGCTGTGGAGG	0	0
CCND1	chr11	69465599	69465623	rs1054137670	69465619	A	G	0	GGGGACGGGCAGGGGGTGTGCAGGG	GGGGACGGGCAGGGGGTGTGCGGGG	0	0
CAMTA1	chr1	7015224	7015248	rs1054191196	7015237	G	C	0	GGGGTGGGGGGTTGGGGGAGCAGGG	GGGGTGGGGGGTTGCGGGAGCAGGG	0	0
DDHD2	chr8	38089450	38089472	rs1054229046	38089468	G	A	0	GGGGCCGGGATGCGGGGCGGGGG	GGGGCCGGGATGCGGGGCGAGGG	0	0
MBNL1	chr3	152168307	152168335	rs1054309140	152168326	G	A	0	GGGAGCTGTGGGGTCTGGGAGGCACAGGG	GGGAGCTGTGGGGTCTGGGAAGCACAGGG	0	0
GUCA1A	chr6	42126652	42126679	rs1054315392	42126661	G	A	0	GGGGCTGAAGGGTTAGTGGGGAGCAGGG	GGGGCTGAAGAGTTAGTGGGGAGCAGGG	0	0
VPS13B	chr8	100606133	100606154	rs1054321881	100606153	G	T	0	GGGTGGAGGGGTGAGGGAGGGG	GGGTGGAGGGGTGAGGGAGGGT	0	0
TFAP2B	chr6	50811770	50811791	rs1054355015	50811776	C	A	0	GGGAGGGCGAGGGCGGGGCGGG	GGGAGGGAGAGGGCGGGGCGGG	0	0
CD55	chr1	207530906	207530935	rs1054483185	207530914	A	G	0	GGGCGGGGGAGGGCGGAGGGCGGGCGGGGG	GGGCGGGGGGGGGCGGAGGGCGGGCGGGGG	0	0
LAMA3	chr18	21278098	21278125	rs1054502294	21278118	T	G	0	GGGAGGGGGTGGGTGGGGTGGTGGGGGG	GGGAGGGGGTGGGTGGGGTGGGGGGGGG	0	0
COL4A2	chr13	111075775	111075802	rs1054507419	111075792	G	A	0	GGGGCCTGTGGGTGGGTCGGGGGGAGGG	GGGGCCTGTGGGTGGGTCAGGGGGAGGG	0	0
SEPT9	chr17	75302080	75302101	rs1054518823	75302086	T	G	0	GGGTGGGTGGGTGGGTGAAGGG	GGGTGGGGGGGTGGGTGAAGGG	0	0
ALDOA	chr16	30078708	30078729	rs1054544753	30078714	G	A	0	GGGTGGAGGGTGCAGGGTTGGG	GGGTGGAAGGTGCAGGGTTGGG	0	0
SH2B3	chr12	111849594	111849615	rs1054552878	111849598	G	A	0	GGGAGGGAATTGGGGGTGGGGG	GGGAGAGAATTGGGGGTGGGGG	0	0
SMOC1	chr14	70391935	70391964	rs1054576145	70391947	A	G	0	GGGATGCTAAGGGAGGAGGGGAAGCAGGGG	GGGATGCTAAGGGGGGAGGGGAAGCAGGGG	0	0
NFIX	chr19	13179136	13179160	rs1054579589	13179156	A	C	0	GGGAGGGGAGCCAAGGGAGACAGGG	GGGAGGGGAGCCAAGGGAGACCGGG	1	1
STX11	chr6	144471907	144471930	rs1054637732	144471916	G	A	0	GGGGAGGGCGGGTCGGGGCGGGGG	GGGGAGGGCGAGTCGGGGCGGGGG	0	0
TRAF3	chr14	103345362	103345388	rs1054670905	103345372	T	G	0	GGGTGATGGGCTTGGGGGAGAATGGGG	GGGTGATGGGCGTGGGGGAGAATGGGG	0	0
HSD17B4	chr5	118968716	118968741	rs1054672028	118968725	C	T	0	GGGAGTGGGGCTTTTTGGGTTTGGGG	GGGAGTGGGGTTTTTTGGGTTTGGGG	0	0
KL	chr13	33590505	33590531	rs1054710299	33590525	C	G	0	GGGCGGGCGGGCGCGGCGGGGCGCGGG	GGGCGGGCGGGCGCGGCGGGGGGCGGG	0	0
RYR1	chr19	38955424	38955452	rs1054718440	38955447	G	T	0	GGGCTGGGGAGGTCGAGGGGTCTTGTGGG	GGGCTGGGGAGGTCGAGGGGTCTTTTGGG	0	0
ST3GAL3	chr1	44364251	44364276	rs1054751925	44364258	G	T	0	GGGACTGAGGGCCTGGGTGGCGGGGG	GGGACTGATGGCCTGGGTGGCGGGGG	1	1
SEPT9	chr17	75368275	75368299	rs1054761578	75368276	G	A	0	GGGTCTAAGGGACGGGGTGACAGGG	GGATCTAAGGGACGGGGTGACAGGG	1	1
COL18A1	chr21	46837320	46837348	rs1054805740	46837327	T	G	0	GGGATCCCTGGGTTCCCCGGGGCTTGGGG	GGGATCCCGGGGTTCCCCGGGGCTTGGGG	0	0
PLCB4	chr20	9274051	9274068	rs1054816485	9274052	G	A	0	GGGAAGGGAAGGGAAGGG	GGAAAGGGAAGGGAAGGG	0	0
RUNX2	chr6	45361634	45361654	rs1054844781	45361649	G	A	0	GGGTTGGGGTTGGGTAGGGGG	GGGTTGGGGTTGGGTAAGGGG	0	0
ALMS1	chr2	73693612	73693636	rs1054882441	73693632	G	T	0	GGGGTGGGGGGAGGGGGGAGGGGGG	GGGGTGGGGGGAGGGGGGAGGTGGG	0	0
CYLD	chr16	50776793	50776822	rs1054914586	50776809	T	G	0	GGGGGGTGGGGGGCGAATGGGGGGCGGGGG	GGGGGGTGGGGGGCGAAGGGGGGGCGGGGG	0	0
PABPN1	chr14	23791116	23791136	rs1054915723	23791126	T	G	0	GGGGGGTGGGGTTGGGCGGGG	GGGGGGTGGGGGTGGGCGGGG	0	0
IGF1R	chr15	99247479	99247500	rs1054963989	99247487	G	T	0	GGGGAGGGAGGGAGGAGTTGGG	GGGGAGGGATGGAGGAGTTGGG	0	0
CD151	chr11	834749	834776	rs1055037152	834773	G	A	0	GGGCGGGCACGGGGCATCTGGGGAGGGG	GGGCGGGCACGGGGCATCTGGGGAGAGG	0	0
SYNE2	chr14	64405803	64405829	rs1055073099	64405817	T	A	0	GGGCACAGGGTGCCATGGGTGTCTGGG	GGGCACAGGGTGCCAAGGGTGTCTGGG	0	0
KCNQ1	chr11	2607825	2607851	rs1055090577	2607850	G	A	0	GGGCAGGGGTCATGGGGTTTGCCAGGG	GGGCAGGGGTCATGGGGTTTGCCAGGA	0	0
CNTNAP2	chr7	146538457	146538483	rs1055165868	146538472	G	A	0	GGGGGTTGGGTGGGGGGAAGGGGAGGG	GGGGGTTGGGTGGGGGAAAGGGGAGGG	0	0
CRB1	chr1	197375071	197375088	rs1055206622	197375080	T	C	0	GGGAGGGAGGTGGGGGGG	GGGAGGGAGGCGGGGGGG	0	0
CRB1	chr1	197334626	197334644	rs1055260955	197334635	G	A	0	GGGGAGGGGGGGAGAAGGG	GGGGAGGGGGAGAGAAGGG	0	0
TGIF1	chr18	3424584	3424600	rs1055274990	3424595	A	G	0	GGGTGGGTGGGTAGGGG	GGGTGGGTGGGTGGGGG	0	0
ERC1	chr12	1231984	1232004	rs1055471109	1231990	G	A	0	GGGGTAGGGGTTGGGGGTGGG	GGGGTAGAGGTTGGGGGTGGG	0	0
CAPN10	chr2	241526531	241526558	rs1055538942	241526538	G	A	0	GGGAGCGGGGCGGGGTGGGCGGCCAGGG	GGGAGCGGAGCGGGGTGGGCGGCCAGGG	0	0
SOX9	chr17	70118619	70118642	rs1055541165	70118622	A	G	0	GGGGAGGGGAGGGAGGGGGCGGGG	GGGGGGGGGAGGGAGGGGGCGGGG	0	0
GNA11	chr19	3097827	3097855	rs1055563464	3097852	G	A	0	GGGGTGGGGCTGCCCTGGGCACTGCAGGG	GGGGTGGGGCTGCCCTGGGCACTGCAAGG	0	0
DYSF	chr2	71681243	71681267	rs1055588392	71681252	T	G	0	GGGGTCGGGGTGGGGTAGAGGAGGG	GGGGTCGGGGGGGGGTAGAGGAGGG	0	0
RAI1	chr17	17695888	17695905	rs1055624688	17695890	C	G	0	GGGCGGGGGGGGGGCGGG	GGGGGGGGGGGGGGCGGG	0	0
ESRRB	chr14	76888183	76888203	rs1055646295	76888186	G	C	0	GGGAGGGAGGGTGTGGTTGGG	GGGACGGAGGGTGTGGTTGGG	0	0
TCF12	chr15	57351932	57351956	rs1055660760	57351945	A	G	0	GGGGGGCTGGGGGGAGGGTGGAGGG	GGGGGGCTGGGGGGGGGGTGGAGGG	0	0
TPCN2	chr11	68828329	68828356	rs1055702639	68828347	C	T	0	GGGTTCCGGGTGAGCTGGGCGCACAGGG	GGGTTCCGGGTGAGCTGGGTGCACAGGG	0	0
SMOC2	chr6	169004005	169004032	rs1055707473	169004029	G	C	0	GGGTGTCATAGGGGTGGGGCAGATGGGG	GGGTGTCATAGGGGTGGGGCAGATGCGG	0	0
LPIN1	chr2	11918438	11918463	rs1055804437	11918442	G	T	0	GGGCTGGGAGTCATGGGCACCAAGGG	GGGCTTGGAGTCATGGGCACCAAGGG	0	0
RYR1	chr19	39059407	39059429	rs1055831194	39059415	G	A	0	GGGGGGCGGGGGGGCGGTGAGGG	GGGGGGCGGAGGGGCGGTGAGGG	0	0
DAGLA	chr11	61464051	61464080	rs1055912894	61464075	T	G	0	GGGCGACCCGGGGTTGGGGGTGGGGTGGGG	GGGCGACCCGGGGTTGGGGGTGGGGGGGGG	0	0
SMOC2	chr6	168860379	168860400	rs1055915095	168860382	T	G	0	GGGGTGGGTGAGCCAGGGTGGG	GGGGGGGGTGAGCCAGGGTGGG	0	0
DCC	chr18	49876885	49876914	rs1056011376	49876907	C	T	0	GGGGCCTACTGGGGAGTTGGGGGCTAGGGG	GGGGCCTACTGGGGAGTTGGGGGTTAGGGG	0	0
DCC	chr18	50168672	50168701	rs1056023478	50168683	A	G	0	GGGCTTTGGGGAATTCGGGGGAAGAGTGGG	GGGCTTTGGGGAGTTCGGGGGAAGAGTGGG	0	0
ARHGEF10	chr8	1856780	1856805	rs1056151690	1856800	C	T	0	GGGTGGGATTTCCTGGGGCTGCGGGG	GGGTGGGATTTCCTGGGGCTGTGGGG	0	0
HMGA2	chr12	66338868	66338893	rs1056158529	66338872	C	T	0	GGGGCCTCAGGGGCATCCTGGGAGGG	GGGGCTTCAGGGGCATCCTGGGAGGG	0	0
MPST	chr22	37416111	37416137	rs1056274896	37416113	T	G	0	GGGTGGGGAGCCTTGGGTGGAAGTGGG	GGGGGGGGAGCCTTGGGTGGAAGTGGG	0	0
POLH	chr6	43562678	43562708	rs1056320235	43562702	T	G	0	GGGGGCTGGGGAGGTGGGGGGCATATGGGGG	GGGGGCTGGGGAGGTGGGGGGCATAGGGGGG	0	0
DPP6	chr7	154594086	154594111	rs1056336979	154594107	T	C	0	GGGGTGGGGGCTGCGGGACTCCTGGG	GGGGTGGGGGCTGCGGGACTCCCGGG	1	1
UVSSA	chr4	1369745	1369767	rs1056363629	1369759	G	A	0	GGGGGTGGGGAGGGAGAGGAGGG	GGGGGTGGGGAGGGAAAGGAGGG	0	0
WWOX	chr16	78671669	78671696	rs1056435647	78671680	G	A	0	GGGATGTGTAGGGGACCTAGGGCCTGGG	GGGATGTGTAGGAGACCTAGGGCCTGGG	1	1
ITGB4	chr17	73723425	73723448	rs1056451931	73723428	T	G	0	GGGTTGGGGCAGCCAGGGAATGGG	GGGTGGGGGCAGCCAGGGAATGGG	0	0
CACNA1C	chr12	2476294	2476315	rs1056562218	2476311	T	G	0	GGGATGGGGGCAGGGTTTTGGG	GGGATGGGGGCAGGGTTTGGGG	0	0
F7	chr13	113760874	113760900	rs1056577914	113760886	T	G	0	GGGGCATGTGGGGTGTGGGGGATGGGG	GGGGCATGTGGGGGGTGGGGGATGGGG	0	0
TUBB3	chr16	89989426	89989452	rs1056603908	89989445	C	T	0	GGGTAGCTGGGGGCGGGGTTCCCAGGG	GGGTAGCTGGGGGCGGGGTTTCCAGGG	0	0
CTDP1	chr18	77511213	77511229	rs1056609060	77511225	T	G	0	GGGAGGGAGGGGCTGGG	GGGAGGGAGGGGCGGGG	0	0
DNM2	chr19	10923067	10923094	rs1056613828	10923085	T	G	0	GGGAGCAGGGCTGCTGGGGTAGGTGGGG	GGGAGCAGGGCTGCTGGGGGAGGTGGGG	0	0
CNTNAP2	chr7	147876668	147876697	rs1056712206	147876670	G	T	0	GGGGTGCGGGGGAGAGAGAGGGAGGGAGGG	GGGTTGCGGGGGAGAGAGAGGGAGGGAGGG	0	0
TRIOBP	chr22	38104884	38104914	rs1056770943	38104902	C	T	0	GGGTGGTGTGGGGTGGTGACGGGGGCTGGGG	GGGTGGTGTGGGGTGGTGATGGGGGCTGGGG	0	0
DTNA	chr18	32201962	32201986	rs1056814183	32201963	G	A	0	GGGTGGGCAGAGGGGAGGAATTGGG	GGATGGGCAGAGGGGAGGAATTGGG	0	0
KCNA1	chr12	5019672	5019704	rs1056825567	5019681	G	A	0	GGGGGTTGGGGGGACCGGGTGGGGGAGGCCGGG	GGGGGTTGGGAGGACCGGGTGGGGGAGGCCGGG	1	1
SLC24A4	chr14	92884559	92884582	rs1056852753	92884569	G	C	0	GGGAAGCCTGGGAGCAGGGGTGGG	GGGAAGCCTGGCAGCAGGGGTGGG	0	0
ANO3	chr11	26478623	26478644	rs1056950934	26478636	G	A	0	GGGGTGGGGGGAGGGGGGAGGG	GGGGTGGGGGGAGGAGGGAGGG	0	0
HGSNAT	chr8	42996254	42996275	rs1056964150	42996266	G	A	0	GGGTGGGAAGCCTGGGGCCGGG	GGGTGGGAAGCCTAGGGCCGGG	0	0
ZEB1	chr10	31608258	31608288	rs1056998094	31608281	C	T	0	GGGGGAGCTGGGCAGCCGGGGCGCCCCCGGG	GGGGGAGCTGGGCAGCCGGGGCGCTCCCGGG	0	0
UGT1A8	chr2	234665929	234665958	rs1057029794	234665943	T	G	0	GGGACAGCTGGGGGTTGGGGGACAGGGGGG	GGGACAGCTGGGGGTGGGGGGACAGGGGGG	2	2
GHRHR	chr7	31017196	31017222	rs1057307109	31017206	G	A	0	GGGATAAGGAGGGGGATTAGGGTAGGG	GGGATAAGGAGAGGGATTAGGGTAGGG	0	0
AGRN	chr1	961217	961242	rs1057329550	961232	G	A	0	GGGAGGGGGGTCTGCCGGGTGAAGGG	GGGAGGGGGGTCTGCCAGGTGAAGGG	0	0
RAD51B	chr14	68840337	68840359	rs1057461065	68840352	C	T	0	GGGTGGGGGGCAAGGGCAAGGGG	GGGTGGGGGGCAAGGGTAAGGGG	0	0
ALPL	chr1	21865125	21865150	rs1057489298	21865140	G	A	0	GGGGGAGGGGAGTGGGGAGAGCCGGG	GGGGGAGGGGAGTGGGAAGAGCCGGG	0	0
COL4A2	chr13	111144425	111144453	rs1057519090	111144451	G	A	0	GGGCTGACTGGGCCTCCAGGGTCGCAGGG	GGGCTGACTGGGCCTCCAGGGTCGCAGAG	1	1
COL6A1	chr21	47409656	47409687	rs1057519174	47409663	A	G	0	GGGTGTGTAGGGAGAAAAAGGGAGCCGTGGGG	GGGTGTGTGGGGAGAAAAAGGGAGCCGTGGGG	0	0
STK11	chr19	1219423	1219449	rs1057521355	1219426	C	T	0	GGGGCAGGGGCCAGGGTGGGGCGGGGG	GGGGTAGGGGCCAGGGTGGGGCGGGGG	0	0
SLC25A38	chr3	39425289	39425316	rs1057522681	39425295	G	A	0	GGGCACTGCGGGGAAGGAAGGGCAGGGG	GGGCACTACGGGGAAGGAAGGGCAGGGG	0	0
STK11	chr19	1226665	1226689	rs1057522995	1226679	C	T	0	GGGGCGCGGCGGGGCCCGGGTGGGG	GGGGCGCGGCGGGGCTCGGGTGGGG	0	0
SCN1B	chr19	35523605	35523630	rs1057523254	35523607	T	C	0	GGGTGCCGGGAACGGGCATGGGAGGG	GGGCGCCGGGAACGGGCATGGGAGGG	0	0
GLRX5	chr14	96001500	96001524	rs1057524469	96001506	G	C	0	GGGGTCCGGGCGTGCGGGCGGCGGG	GGGGTCCCGGCGTGCGGGCGGCGGG	0	0
COL6A1	chr21	47412304	47412328	rs1064796958	47412306	G	A	0	GGGGAGCGGGTGAGTGGGGCAGGGG	GGGAAGCGGGTGAGTGGGGCAGGGG	0	0
ALDH2	chr12	112241721	112241750	rs1064933	112241722	G	A	0	GGGAGTGGCCGGGAGTTGGGCGAGTACGGG	GGAAGTGGCCGGGAGTTGGGCGAGTACGGG	0	0
JPH3	chr16	87655707	87655733	rs1077301	87655711	G	T	0	GGGGGGGGCCCCTTTGGGGTGGAGGGG	GGGGGTGGCCCCTTTGGGGTGGAGGGG	0	0
VCL	chr10	75785436	75785454	rs10824057	75785440	A	G	0	GGGAGAGAGGGAGGGAGGG	GGGAGGGAGGGAGGGAGGG	0	0
ADK	chr10	76353945	76353965	rs11001076	76353946	G	T	0	GGGGTGGGGGGTTGGGGAGGG	GGTGTGGGGGGTTGGGGAGGG	0	0
D2HGDH	chr2	242704913	242704942	rs111162968	242704920	T	G	0	GGGAGAAGTTGGGGAGATGGGAGCCCCGGG	GGGAGAAGGTGGGGAGATGGGAGCCCCGGG	0	0
D2HGDH	chr2	242704963	242704992	rs111162969	242704970	T	G	0	GGGAGAAGTTGGGGAGATGGGAGCCCCGGG	GGGAGAAGGTGGGGAGATGGGAGCCCCGGG	0	0
D2HGDH	chr2	242705013	242705042	rs111163251	242705020	T	G	0	GGGAGAAGTTGGGGAGATGGGAGCCCCGGG	GGGAGAAGGTGGGGAGATGGGAGCCCCGGG	0	0
RBPJ	chr4	26216584	26216598	rs111216378	26216592	G	A	0	GGGAGGGAGGGAGGG	GGGAGGGAGAGAGGG	0	0
PTH1R	chr3	46944684	46944707	rs111295825	46944700	G	T	0	GGGTGTCCAGGGGCCGGGATGGGG	GGGTGTCCAGGGGCCGGTATGGGG	0	0
CACNA1H	chr16	1254929	1254956	rs111346499	1254950	T	G	0	GGGGAGGGGTGGGAGCCGCGGGTGGGGG	GGGGAGGGGTGGGAGCCGCGGGGGGGGG	0	0
COMT	chr22	19953330	19953353	rs111348802	19953338	C	T	0	GGGGGTGGGCATTGGGAGGGTGGG	GGGGGTGGGTATTGGGAGGGTGGG	0	0
CDH3	chr16	68679371	68679395	rs111398116	68679388	G	T	0	GGGGGGCGGGCGGGGTCCGCATGGG	GGGGGGCGGGCGGGGTCCTCATGGG	0	0
PALLD	chr4	169630741	169630763	rs111427712	169630762	G	A	0	GGGAGGGAGGGAGGGAGGGAGGG	GGGAGGGAGGGAGGGAGGGAGGA	0	0
ARID1B	chr6	157343267	157343287	rs111452518	157343283	G	A	0	GGGCGGGGAGGCGGGGCGGGG	GGGCGGGGAGGCGGGGCAGGG	0	0
CACNA1C	chr12	2232647	2232671	rs111454651	2232657	A	G	0	GGGTTCTAGGGAAGAGTAGGGCGGG	GGGTTCTAGGGGAGAGTAGGGCGGG	0	0
COL18A1	chr21	46879693	46879717	rs111456851	46879713	C	T	0	GGGGCTTGGGCTTGGGCTGCCCGGG	GGGGCTTGGGCTTGGGCTGCCTGGG	0	0
DPP10	chr2	116407980	116407997	rs111479050	116407986	G	A	0	GGGGAAAGGGGGGGGGGG	GGGGAAAAGGGGGGGGGG	0	0
F7	chr13	113763108	113763136	rs111550956	113763120	G	T	0	GGGTGTCCCGGGGGCGTGGGTGTCCCGGG	GGGTGTCCCGGGGTCGTGGGTGTCCCGGG	0	0
GRM1	chr6	146588786	146588818	rs11155460	146588806	G	C	0	GGGCTGGGCTGGGCTGGGCTGGGCTGGGCTGGG	GGGCTGGGCTGGGCTGGGCTGCGCTGGGCTGGG	0	0
F7	chr13	113761610	113761638	rs111565637	113761627	G	A	0	GGGTGTCCCGGGGGCGTGGGTGTCCCGGG	GGGTGTCCCGGGGGCGTGAGTGTCCCGGG	0	0
RNF213	chr17	78234755	78234779	rs111571688	78234762	C	T	0	GGGCCCCGCGGGCCGGCGGGCCGGG	GGGCCCCGTGGGCCGGCGGGCCGGG	0	0
C2	chr6	31869765	31869789	rs111592556	31869787	G	A	0	GGGCGTAAGGGGGGAGGGGCGGGGG	GGGCGTAAGGGGGGAGGGGCGGGAG	0	0
EIF2B5	chr3	183904453	183904480	rs111599594	183904455	A	G	0	GGGAGTAGGGGTTGATGGGGGCGAAGGG	GGGGGTAGGGGTTGATGGGGGCGAAGGG	0	0
ALG6	chr1	63847336	63847358	rs111626582	63847339	G	A	0	GGGAGGGGAGGGGAGGGGAGGGG	GGGAAGGGAGGGGAGGGGAGGGG	0	0
GPC6	chr13	94113917	94113934	rs111663858	94113924	T	G	0	GGGGGGGTTGGGGGGGGG	GGGGGGGTGGGGGGGGGG	0	0
EGF	chr4	110925924	110925950	rs111708171	110925937	G	A	0	GGGAGGTCCTGGGTGGGAGGGTGGGGG	GGGAGGTCCTGGGTAGGAGGGTGGGGG	0	0
ZNF365	chr10	64382623	64382643	rs111751584	64382641	G	A	0	GGGGGGGGGGGATAGGCAGGG	GGGGGGGGGGGATAGGCAGAG	0	0
NAT8L	chr4	2067817	2067845	rs111779103	2067819	C	G	0	GGGCTCCTGGGGTGCAGGGTGCTTGGGGG	GGGGTCCTGGGGTGCAGGGTGCTTGGGGG	0	0
RGS9	chr17	63219431	63219461	rs111780863	63219449	G	C	0	GGGATTCTGGGCAGTGAGGGGGAATGATGGG	GGGATTCTGGGCAGTGAGGCGGAATGATGGG	0	0
CNTN1	chr12	41310858	41310874	rs11179035	41310867	G	T	0	GGGGGCGGGGGGGGGGG	GGGGGCGGGGTGGGGGG	0	0
F7	chr13	113763108	113763136	rs111826401	113763123	T	A	0	GGGTGTCCCGGGGGCGTGGGTGTCCCGGG	GGGTGTCCCGGGGGCGAGGGTGTCCCGGG	0	0
EPX	chr17	56270501	56270526	rs111882990	56270512	T	C	0	GGGTCTGGGGGCTGCATGGGCCTGGG	GGGTCTGGGGGCCGCATGGGCCTGGG	0	0
F7	chr13	113760874	113760900	rs111925274	113760888	T	G	0	GGGGCATGTGGGGTGTGGGGGATGGGG	GGGGCATGTGGGGTGGGGGGGATGGGG	0	0
HK1	chr10	71076042	71076067	rs111938499	71076047	T	C	0	GGGCCATGAAGGGATTTAGGGAAGGG	GGGCCACGAAGGGATTTAGGGAAGGG	0	0
FAH	chr15	80445292	80445318	rs111985816	80445311	G	T	0	GGGGGCGGGCAGGGGGGCGGGGCCGGG	GGGGGCGGGCAGGGGGGCGGTGCCGGG	0	0
LAMA2	chr6	129706281	129706301	rs112018443	129706287	G	A	0	GGGGAGGGAGGGGAGGGAGGG	GGGGAGGAAGGGGAGGGAGGG	0	0
MYH14	chr19	50729580	50729603	rs112020724	50729593	A	G	0	GGGTCTGAGGGAGGAGGGGCTGGG	GGGTCTGAGGGAGGGGGGGCTGGG	0	0
CAMTA1	chr1	7537120	7537147	rs112025139	7537136	G	A	0	GGGCAAGGGGGTGTGAGGGAGGCCAGGG	GGGCAAGGGGGTGTGAGAGAGGCCAGGG	0	0
FREM2	chr13	39429855	39429880	rs112070926	39429879	G	T	0	GGGACTCCAGGGAAAGGGTGGGAGGG	GGGACTCCAGGGAAAGGGTGGGAGGT	1	1
FGGY	chr1	60022639	60022662	rs11207475	60022657	C	T	0	GGGAGTGGGAAGGGACCCTCTGGG	GGGAGTGGGAAGGGACCCTTTGGG	1	1
DYSF	chr2	71692543	71692572	rs112228256	71692550	G	A	0	GGGCGATGGGGTGTCCTAGGGGCATCCGGG	GGGCGATGAGGTGTCCTAGGGGCATCCGGG	0	0
DYNC2H1	chr11	103137090	103137117	rs11225638	103137111	G	A	0	GGGCAGGGCCCCTGTGGGTGCAGGTGGG	GGGCAGGGCCCCTGTGGGTGCAAGTGGG	0	0
GPC6	chr13	94113917	94113934	rs112257027	94113923	T	G	0	GGGGGGGTTGGGGGGGGG	GGGGGGGGTGGGGGGGGG	0	0
BEAN1	chr16	66508499	66508517	rs112277155	66508511	G	C	0	GGGAGGGAGAGAGGGAGGG	GGGAGGGAGAGAGCGAGGG	0	0
ZIC2	chr13	100634711	100634738	rs112291500	100634725	C	G	0	GGGCGGCGGGCAGCACGGGCTGTTCGGG	GGGCGGCGGGCAGCAGGGGCTGTTCGGG	0	0
NAT8L	chr4	2069408	2069436	rs112315376	2069431	G	A	0	GGGCAGGGGGCTGTGTGGGCCCTCGTGGG	GGGCAGGGGGCTGTGTGGGCCCTCATGGG	0	0
EPB41	chr1	29224114	29224146	rs112376854	29224139	A	G	0	GGGGAGGGGAGGGGAGAGGAGGGGAGAGGAGGG	GGGGAGGGGAGGGGAGAGGAGGGGAGGGGAGGG	0	0
ADCK3	chr1	227164077	227164103	rs112426397	227164082	G	C	0	GGGGCTGTGGGACTGCGGGGCTGTGGG	GGGGCTCTGGGACTGCGGGGCTGTGGG	1	1
COL4A3	chr2	228058451	228058465	rs112474431	228058459	G	A	0	GGGAGGGAGGGAGGG	GGGAGGGAGAGAGGG	0	0
CACNA1C	chr12	2375420	2375441	rs112493087	2375436	C	G	0	GGGCCGGGCGGGCAGTACTGGG	GGGCCGGGCGGGCAGTAGTGGG	0	0
BCAM	chr19	45314184	45314208	rs112544073	45314200	G	T	0	GGGTCTGAGGGAGGAGGGGCTGGGG	GGGTCTGAGGGAGGAGGTGCTGGGG	0	0
PALLD	chr4	169420394	169420415	rs112594434	169420396	A	G	0	GGGAGAAGGGAGGGAGGAAGGG	GGGGGAAGGGAGGGAGGAAGGG	0	0
DPP6	chr7	153658643	153658662	rs112614841	153658644	G	C	0	GGGGAGTGGGGTGGGGTGGG	GGCGAGTGGGGTGGGGTGGG	0	0
CNTNAP2	chr7	147876668	147876697	rs112621831	147876694	G	A	0	GGGGTGCGGGGGAGAGAGAGGGAGGGAGGG	GGGGTGCGGGGGAGAGAGAGGGAGGGAAGG	0	0
ERC1	chr12	1596929	1596943	rs112653450	1596942	G	A	0	GGGAGGGAGGGAGGG	GGGAGGGAGGGAGGA	0	0
KAT6B	chr10	76586779	76586810	rs112660780	76586806	T	G	0	GGGCGGAGGGGGGCGGGGCGGGATCGGGTGGG	GGGCGGAGGGGGGCGGGGCGGGATCGGGGGGG	0	0
ROBO2	chr3	77213577	77213594	rs112686039	77213586	T	G	0	GGGAGGGAGGTGGGGGGG	GGGAGGGAGGGGGGGGGG	0	0
GPC6	chr13	94113917	94113934	rs112720674	94113925	G	T	0	GGGGGGGTTGGGGGGGGG	GGGGGGGTTTGGGGGGGG	0	0
GPC6	chr13	94740798	94740826	rs112739765	94740810	A	C	0	GGGAAGGGAAGGGAAGGGCAGGGGAGGGG	GGGAAGGGAAGGGCAGGGCAGGGGAGGGG	0	0
ROBO3	chr11	124735810	124735838	rs112745647	124735819	G	C	0	GGGTACCCGCGGGAGGTCGAGGGCTTGGG	GGGTACCCGCCGGAGGTCGAGGGCTTGGG	0	0
F7	chr13	113762265	113762292	rs112776050	113762280	C	G	0	GGGGGCGTGGGTGTCCCGGGAGTGTGGG	GGGGGCGTGGGTGTCCGGGGAGTGTGGG	0	0
DPP6	chr7	154099684	154099705	rs112855383	154099694	A	G	0	GGGTTGGGGGGAGGGGGGAGGG	GGGTTGGGGGGGGGGGGGAGGG	0	0
MYBPC1	chr12	102036461	102036481	rs112869312	102036467	G	A	0	GGGGTTGGGAGTGGGGCTGGG	GGGGTTGAGAGTGGGGCTGGG	0	0
MXI1	chr10	111986210	111986232	rs112871421	111986230	G	A	0	GGGGAGGGGCGTGTGGGGAGGGG	GGGGAGGGGCGTGTGGGGAGGAG	0	0
TUBB3	chr16	89992452	89992474	rs112960327	89992460	A	G	0	GGGGGGGGCAGGGGCGGGCCGGG	GGGGGGGGCGGGGGCGGGCCGGG	0	0
FIP1L1	chr4	54767735	54767761	rs113008269	54767757	A	G	0	GGGAGGGAGGGAGGGAGGGAGGGAGGG	GGGAGGGAGGGAGGGAGGGAGGGGGGG	0	0
PLOD1	chr1	11995405	11995434	rs113052886	11995409	T	C	0	GGGAATGAGGGGTCTTGAGGGGGACAGGGG	GGGAACGAGGGGTCTTGAGGGGGACAGGGG	1	1
DYSF	chr2	71755543	71755570	rs113064607	71755554	G	A	0	GGGAGCAGGAGGGTTCTCTCGGGAGGGG	GGGAGCAGGAGGATTCTCTCGGGAGGGG	0	0
MRPS22	chr3	139043683	139043704	rs113078615	139043703	G	A	0	GGGCTAAGGGATGGGCCCAGGG	GGGCTAAGGGATGGGCCCAGGA	0	0
IYD	chr6	150693394	150693418	rs113184222	150693415	G	A	0	GGGTGGGTTGTGGGGTGGTGAGGGG	GGGTGGGTTGTGGGGTGGTGAGAGG	0	0
SYNGAP1	chr6	33393509	33393540	rs113204886	33393530	G	A	0	GGGGGGAAGAGGGAGGGGAGGGGCGGCGTGGG	GGGGGGAAGAGGGAGGGGAGGGACGGCGTGGG	0	0
BANK1	chr4	102721290	102721310	rs113295231	102721304	G	C	0	GGGTGGGGGGAGGGGGGAGGG	GGGTGGGGGGAGGGGCGAGGG	0	0
LAMA2	chr6	129608151	129608177	rs113297649	129608167	G	A	0	GGGAAGGAGGGAGAGAGGGAGGGAGGG	GGGAAGGAGGGAGAGAGAGAGGGAGGG	0	0
CDH23	chr10	73358653	73358676	rs113335602	73358658	C	G	0	GGGGCACTGGGCCAAGGGCTTGGG	GGGGCAGTGGGCCAAGGGCTTGGG	0	0
CNNM4	chr2	97426828	97426852	rs113347008	97426832	C	G	0	GGGCGCTGGGGGCCCGGGGCCAGGG	GGGCGGTGGGGGCCCGGGGCCAGGG	0	0
NFIX	chr19	13207171	13207196	rs113396930	13207181	G	A	0	GGGAGGGAAGAGGAGGGAGTGACGGG	GGGAGGGAAGAAGAGGGAGTGACGGG	0	0
DNASE1	chr16	3726366	3726389	rs113425922	3726374	G	T	0	GGGCGGGGGGCGGGGGGGCGGGGG	GGGCGGGGGTCGGGGGGGCGGGGG	0	0
KLHL40	chr3	42731971	42731997	rs113500447	42731989	G	A	0	GGGTGGGGCTGCAGGGGCCGCTGAGGG	GGGTGGGGCTGCAGGGGCCACTGAGGG	0	0
FGD4	chr12	32786138	32786161	rs113580014	32786154	G	A	0	GGGGACCGGGTTGGGAGGAGGGGG	GGGGACCGGGTTGGGAGAAGGGGG	1	1
WNT10A	chr2	219763021	219763044	rs113605648	219763034	T	G	0	GGGTCTGCAGGGGCTCGGGTAGGG	GGGTCTGCAGGGGCGCGGGTAGGG	0	0
CAMTA1	chr1	7289607	7289636	rs113643155	7289619	A	G	0	GGGGATGGGGTGGAGAGGGGGAGAGGAGGG	GGGGATGGGGTGGGGAGGGGGAGAGGAGGG	0	0
LMNA	chr1	156071429	156071455	rs113660801	156071430	G	A	0	GGGAGGGAGGGAGGGAGGGAGGGAGGG	GGAAGGGAGGGAGGGAGGGAGGGAGGG	0	0
WFS1	chr4	6280887	6280905	rs113749402	6280896	G	T	0	GGGAGGGCAGGGCCCAGGG	GGGAGGGCAGTGCCCAGGG	0	0
CHAT	chr10	50829993	50830014	rs113763684	50830004	G	A	0	GGGGATGAGGGAGGGAGGAGGG	GGGGATGAGGGAAGGAGGAGGG	0	0
MYLK2	chr20	30410405	30410429	rs113766980	30410409	G	A	0	GGGCTGGGGGTGGGGTGAGATGGGG	GGGCTAGGGGTGGGGTGAGATGGGG	0	0
CD81	chr11	2398844	2398870	rs113952014	2398845	G	C	0	GGGTAAGGGCTGCGCCGGGGGCCGGGG	GGCTAAGGGCTGCGCCGGGGGCCGGGG	0	0
HNF4A	chr20	43058064	43058081	rs114265655	43058079	G	A	0	GGGGCAGGGTGGGAGGGG	GGGGCAGGGTGGGAGGAG	0	0
PLCB4	chr20	9125359	9125389	rs114391614	9125366	A	G	0	GGGGAAGAAGGGGAAGGAGGGGAAGGAGGGG	GGGGAAGAGGGGGAAGGAGGGGAAGGAGGGG	0	0
SMAD6	chr15	67022560	67022591	rs114554257	67022589	G	A	0	GGGATAGGCTGGGTCATTGGGGAGAAGTTGGG	GGGATAGGCTGGGTCATTGGGGAGAAGTTGAG	0	0
HNF4A	chr20	43059000	43059021	rs114764820	43059004	T	C	0	GGGACTTGGGTGGGTACTTGGG	GGGACCTGGGTGGGTACTTGGG	1	1
STXBP2	chr19	7703762	7703789	rs115273676	7703777	A	G	0	GGGTGGAGTTGGGTGAATGGGTTCTGGG	GGGTGGAGTTGGGTGAGTGGGTTCTGGG	0	0
SMC3	chr10	112327702	112327731	rs115314965	112327722	G	A	0	GGGCTGGGCGGGGACTGTGGGGGAGGAGGG	GGGCTGGGCGGGGACTGTGGGAGAGGAGGG	1	1
FIP1L1	chr4	54822933	54822956	rs115356887	54822954	G	A	0	GGGGGTGGGGAAGGGGAGGAAGGG	GGGGGTGGGGAAGGGGAGGAAGAG	0	0
RBPJ	chr4	26241350	26241368	rs115434597	26241365	G	A	0	GGGGAGGGGAGGGGAGGGG	GGGGAGGGGAGGGGAGAGG	0	0
CAPN5	chr11	76806964	76806993	rs115453539	76806986	G	T	0	GGGTCCCAGGGAGGCCAGGGCGGGTCTGGG	GGGTCCCAGGGAGGCCAGGGCGGTTCTGGG	0	0
ADK	chr10	76113167	76113187	rs115489075	76113168	G	A	0	GGGTAGGGGTCAAGGGGAGGG	GGATAGGGGTCAAGGGGAGGG	0	0
DCC	chr18	50637620	50637641	rs1156455347	50637640	G	A	0	GGGGTGGGGGGAGGGGGGAGGG	GGGGTGGGGGGAGGGGGGAGGA	0	0
EIF2B5	chr3	184090416	184090442	rs1156559941	184090440	G	A	0	GGGGTGGGCAAGGTGGGTGGAAGAGGG	GGGGTGGGCAAGGTGGGTGGAAGAGAG	0	0
PCNT	chr21	47843640	47843662	rs1156575063	47843654	A	G	0	GGGGAGGGGGAGGGGAAGAGGGG	GGGGAGGGGGAGGGGGAGAGGGG	0	0
HNF4A	chr20	43058064	43058081	rs1156602361	43058072	T	G	0	GGGGCAGGGTGGGAGGGG	GGGGCAGGGGGGGAGGGG	0	0
PROC	chr2	128180773	128180799	rs1156625722	128180786	G	T	0	GGGCGGCGGGGCGGGGCTGGGGCCGGG	GGGCGGCGGGGCGGTGCTGGGGCCGGG	0	0
NDUFS7	chr19	1387906	1387932	rs1156639652	1387917	G	T	0	GGGGCGGGGGGGGTGGGGGGTGGGGGG	GGGGCGGGGGGGTTGGGGGGTGGGGGG	0	0
JAM3	chr11	133979582	133979611	rs115664681	133979586	A	G	0	GGGAAAAAGTGGGCTGGAGGGGAAAGAGGG	GGGAAGAAGTGGGCTGGAGGGGAAAGAGGG	0	0
ADCK3	chr1	227163973	227164000	rs1156674608	227163997	G	T	0	GGGGCTGCAGGGCTGCGGGACTGCGGGG	GGGGCTGCAGGGCTGCGGGACTGCGTGG	1	1
F7	chr13	113762545	113762574	rs1156682146	113762546	G	T	0	GGGTGTCCCGGGAGTGTGGGTGTCCCGGGG	GGTTGTCCCGGGAGTGTGGGTGTCCCGGGG	0	0
GRN	chr17	42427741	42427771	rs1156888494	42427750	G	A	0	GGGAAGTGGGGGCAGAGTTGGGGGCCAGGGG	GGGAAGTGGGAGCAGAGTTGGGGGCCAGGGG	0	0
MYH14	chr19	50729580	50729603	rs1156905308	50729586	A	G	0	GGGTCTGAGGGAGGAGGGGCTGGG	GGGTCTGGGGGAGGAGGGGCTGGG	0	0
EGF	chr4	110914104	110914125	rs11569069	110914118	G	A	0	GGGGTGGGGGGAGGGGGGAGGG	GGGGTGGGGGGAGGGAGGAGGG	0	0
LIPC	chr15	58744915	58744942	rs1156915029	58744928	T	G	0	GGGGTAGGGTGGAGTGGGATGGGGTGGG	GGGGTAGGGTGGAGGGGGATGGGGTGGG	0	0
MSH6	chr2	48010960	48010986	rs1157007910	48010984	G	A	0	GGGTGGGGAGGGGGCCTGGGAGGTGGG	GGGTGGGGAGGGGGCCTGGGAGGTGAG	0	0
IDUA	chr4	996952	996982	rs1157034852	996963	G	A	0	GGGCCGCGGAGGGGCGAGGGGCCGGGCCGGG	GGGCCGCGGAGGAGCGAGGGGCCGGGCCGGG	0	0
TFG	chr3	100428680	100428705	rs1157036235	100428700	G	C	0	GGGAAGGGGCTGGAGGGAGGAGGGGG	GGGAAGGGGCTGGAGGGAGGACGGGG	0	0
SYNGAP1	chr6	33395989	33396010	rs1157230745	33395993	C	G	0	GGGCGCGGGGAGGGGGGTGGGG	GGGCGGGGGGAGGGGGGTGGGG	0	0
RAI1	chr17	17710502	17710529	rs1157239608	17710505	A	G	0	GGGGAGGACGGGCGCTTGGGGTGCAGGG	GGGGGGGACGGGCGCTTGGGGTGCAGGG	0	0
GNA11	chr19	3115822	3115852	rs1157240630	3115843	G	A	0	GGGGTCATAGGGACTGAGTGGGGAGGAGGGG	GGGGTCATAGGGACTGAGTGGGAAGGAGGGG	1	1
CA4	chr17	58245863	58245883	rs1157262303	58245877	G	A	0	GGGGGGGCAGGTGGGGAAGGG	GGGGGGGCAGGTGGGAAAGGG	0	0
CIRH1A	chr16	69205522	69205551	rs115728868	69205547	G	A	0	GGGGGAAGGGAAGGGAGGGGAAAGGAGGGG	GGGGGAAGGGAAGGGAGGGGAAAGGAAGGG	0	0
CDH3	chr16	68744909	68744927	rs1157305764	68744922	A	G	0	GGGGAGGGGAGGGGAGGGG	GGGGAGGGGAGGGGGGGGG	0	0
PAX7	chr1	19066304	19066328	rs1157316841	19066306	G	C	0	GGGGAGTGGGGGCAGGGGCCCAGGG	GGGCAGTGGGGGCAGGGGCCCAGGG	0	0
RNF213	chr17	78329447	78329476	rs1157322590	78329475	G	A	0	GGGGTGGACGGGAATGGGGGCTTACAGGGG	GGGGTGGACGGGAATGGGGGCTTACAGGGA	0	0
CHAT	chr10	50823203	50823225	rs1157420814	50823209	A	G	0	GGGGGGGAGGGGGGGGCTCTGGG	GGGGGGGGGGGGGGGGCTCTGGG	0	0
ARHGEF10	chr8	1772178	1772210	rs1157421725	1772183	C	T	0	GGGGAACGGCGGGGGACGGCGGGGAACAGCGGG	GGGGAATGGCGGGGGACGGCGGGGAACAGCGGG	1	1
SEPT9	chr17	75494480	75494502	rs1157426011	75494490	T	G	0	GGGATGGGGAGTGGGGGTGGGGG	GGGATGGGGAGGGGGGGTGGGGG	0	0
RAD51B	chr14	69020425	69020453	rs1157471196	69020438	G	C	0	GGGTGGAGGTGGGTGGGGGGAGGGTGGGG	GGGTGGAGGTGGGTCGGGGGAGGGTGGGG	0	0
CRB1	chr1	197359311	197359332	rs1157476140	197359317	A	G	0	GGGGGGGAGGGGGTGGGGCGGG	GGGGGGGGGGGGGTGGGGCGGG	0	0
LRAT	chr4	155627582	155627603	rs1157574132	155627599	A	G	0	GGGGTGGGGGGAGGGGGGAGGG	GGGGTGGGGGGAGGGGGGGGGG	0	0
TENM3	chr4	183407469	183407487	rs1157586079	183407481	G	A	0	GGGGGGGAGGGTGGGTGGG	GGGGGGGAGGGTGAGTGGG	0	0
CAMTA1	chr1	7746561	7746588	rs1157611867	7746584	T	G	0	GGGAGGTGGAGGGGGTTGCGGGGATGGG	GGGAGGTGGAGGGGGTTGCGGGGAGGGG	0	0
TGM6	chr20	2381374	2381391	rs1157625976	2381382	T	G	0	GGGGTGGGGTGGGGTGGG	GGGGTGGGGGGGGGTGGG	0	0
EIF2B5	chr3	183882993	183883017	rs1157731707	183883014	G	C	0	GGGTATGGGGTCTGGGAGGCTAGGG	GGGTATGGGGTCTGGGAGGCTACGG	0	0
SCN1B	chr19	35522210	35522239	rs1157763963	35522216	T	G	0	GGGATGCTGGGGACATGGGGGTCAAGGGGG	GGGATGCGGGGGACATGGGGGTCAAGGGGG	1	1
CD19	chr16	28943938	28943957	rs1157875400	28943940	C	T	0	GGGCCGGGCTGGGGCAGGGG	GGGTCGGGCTGGGGCAGGGG	0	0
LIPC	chr15	58727700	58727727	rs1157966046	58727707	T	G	0	GGGGGCCATGGGACTGGGTGGAGGGGGG	GGGGGCCAGGGGACTGGGTGGAGGGGGG	1	1
LEPR	chr1	65910255	65910284	rs1157999990	65910257	T	G	0	GGGTGGAGGCGGGCGGGGGGTGGGGTGGGG	GGGGGGAGGCGGGCGGGGGGTGGGGTGGGG	0	0
CFTR	chr7	117250291	117250312	rs1158005014	117250296	G	A	0	GGGGTGGGGGGAGGGGGGAGGG	GGGGTGAGGGGAGGGGGGAGGG	0	0
RET	chr10	43589519	43589542	rs1158140838	43589541	G	C	0	GGGAAGTGGGAGGGAAGCGGTGGG	GGGAAGTGGGAGGGAAGCGGTGGC	0	0
CD44	chr11	35228200	35228224	rs1158158677	35228212	T	G	0	GGGTGGTGGGGGTTGGTGGGGGGGG	GGGTGGTGGGGGTGGGTGGGGGGGG	0	0
SMOC2	chr6	168937629	168937651	rs115834222	168937638	A	G	0	GGGTCGGGGCAGCAGGGTCGGGG	GGGTCGGGGCGGCAGGGTCGGGG	0	0
BFSP2	chr3	133168864	133168888	rs1158398938	133168877	G	A	0	GGGAGGGAGGGGGAGGGAAGGAGGG	GGGAGGGAGGGGGAAGGAAGGAGGG	0	0
ACVR2B	chr3	38496484	38496509	rs1158444769	38496499	A	G	0	GGGCACTTGGGAGGGGAGGGGGTGGG	GGGCACTTGGGAGGGGGGGGGGTGGG	0	0
F7	chr13	113763261	113763290	rs1158446891	113763271	G	A	0	GGGTGTCCCGGGAGCGTGGGTGTCCCAGGG	GGGTGTCCCGGAAGCGTGGGTGTCCCAGGG	0	0
BICC1	chr10	60346285	60346303	rs1158458079	60346289	T	G	0	GGGGTTGGGGGCGGGGGGG	GGGGTGGGGGGCGGGGGGG	0	0
NAT8L	chr4	2064191	2064213	rs1158460323	2064203	G	A	0	GGGTAGGGAGATGGGGGGTTGGG	GGGTAGGGAGATGAGGGGTTGGG	0	0
PLOD1	chr1	11999417	11999440	rs115854328	11999434	G	C	0	GGGGGAGGGGAGAGGGCGGAAGGG	GGGGGAGGGGAGAGGGCGCAAGGG	0	0
GPC6	chr13	94744376	94744395	rs1158614544	94744389	G	A	0	GGGGTGGGGCGGGGGGCGGG	GGGGTGGGGCGGGGAGCGGG	0	0
NCF1	chr7	74202439	74202471	rs1158635576	74202448	G	A	0	GGGGGTCCCCGGGGCTGGGCGGGGTCGAGCGGG	GGGGGTCCCCAGGGCTGGGCGGGGTCGAGCGGG	0	0
LAMA2	chr6	129767647	129767675	rs1158648260	129767653	G	A	0	GGGAAGGGGAGGAGAGGGGAGGGGAGGGG	GGGAAGGAGAGGAGAGGGGAGGGGAGGGG	0	0
BEAN1	chr16	66508499	66508517	rs1158686589	66508503	G	A	0	GGGAGGGAGAGAGGGAGGG	GGGAGAGAGAGAGGGAGGG	0	0
SMOC2	chr6	168860301	168860324	rs1158705717	168860310	G	A	0	GGGGTGGGTGGGCCCTGGGGTGGG	GGGGTGGGTGAGCCCTGGGGTGGG	0	0
CACNA1H	chr16	1254929	1254956	rs1158749006	1254932	A	G	0	GGGGAGGGGTGGGAGCCGCGGGTGGGGG	GGGGGGGGGTGGGAGCCGCGGGTGGGGG	0	0
ESPN	chr1	6500581	6500607	rs1158797954	6500593	G	A	0	GGGGTGGGGCGGGGGGGCGGGGGCGGG	GGGGTGGGGCGGGAGGGCGGGGGCGGG	0	0
CAMTA1	chr1	7438921	7438948	rs1158901297	7438946	G	A	0	GGGGACCCAGGGGCCAGGGCTTCCTGGG	GGGGACCCAGGGGCCAGGGCTTCCTGAG	1	1
PHKG2	chr16	30768981	30769003	rs1158938573	30769001	G	A	0	GGGGCAGGGAAGAAGGGGCAGGG	GGGGCAGGGAAGAAGGGGCAGAG	0	0
PRPF6	chr20	62663155	62663180	rs1158945565	62663172	G	A	0	GGGAGCACCAGGGCTGCGGGTCAGGG	GGGAGCACCAGGGCTGCGAGTCAGGG	0	0
FIP1L1	chr4	54628686	54628707	rs1159014885	54628701	G	A	0	GGGGTGGGGGGAGGGGGGAGGG	GGGGTGGGGGGAGGGGAGAGGG	0	0
MEGF8	chr19	42830465	42830490	rs1159033433	42830469	C	T	0	GGGGCCCGGGCGGGGGACTGCAAGGG	GGGGCTCGGGCGGGGGACTGCAAGGG	1	1
GIPC3	chr19	3586685	3586701	rs1159072908	3586693	T	G	0	GGGAGGGGGTGGGCGGG	GGGAGGGGGGGGGCGGG	0	0
PROC	chr2	128183986	128184012	rs1159120280	128183988	T	G	0	GGGTGGGTGAGGGGAGGGGCATGGGGG	GGGGGGGTGAGGGGAGGGGCATGGGGG	0	0
CACNA1H	chr16	1254845	1254872	rs1159248932	1254848	A	G	0	GGGGAGGGGTGGGAGCCGCGGGTGGGGG	GGGGGGGGGTGGGAGCCGCGGGTGGGGG	0	0
ATP2A1	chr16	28915330	28915362	rs1159323642	28915353	T	C	0	GGGCTGCAGTGGGGGGGGGCGGGGTGTCTGGGG	GGGCTGCAGTGGGGGGGGGCGGGGCGTCTGGGG	0	0
GLCCI1	chr7	8026000	8026020	rs1159329982	8026011	A	G	0	GGGAGCAGGGGGAGGGGGGGG	GGGAGCAGGGGGGGGGGGGGG	0	0
ARID1B	chr6	157215429	157215455	rs1159343407	157215445	T	G	0	GGGATGGGGGCCGGGGGTTGGGATGGG	GGGATGGGGGCCGGGGGGTGGGATGGG	0	0
SYNGAP1	chr6	33393509	33393540	rs1159345373	33393537	G	A	0	GGGGGGAAGAGGGAGGGGAGGGGCGGCGTGGG	GGGGGGAAGAGGGAGGGGAGGGGCGGCGTAGG	0	0
RYR1	chr19	38931869	38931901	rs1159436580	38931881	A	G	0	GGGAGGAGCAGGGAAACTGAGGGACGGCTGGGG	GGGAGGAGCAGGGGAACTGAGGGACGGCTGGGG	1	1
GNMT	chr6	42930988	42931008	rs1159510524	42930990	G	T	0	GGGGGTGGGGTGGAGGGAGGG	GGGTGTGGGGTGGAGGGAGGG	0	0
EDARADD	chr1	236630595	236630615	rs1159526275	236630597	T	G	0	GGGTGGGGGTGGGGTGGGGGG	GGGGGGGGGTGGGGTGGGGGG	0	0
WWOX	chr16	79085468	79085482	rs1159546653	79085474	T	G	0	GGGTGGGTGGGAGGG	GGGTGGGGGGGAGGG	0	0
CGNL1	chr15	57819063	57819088	rs1159633350	57819065	C	T	0	GGGCACGCTGGGCATTGGGAAGGGGG	GGGTACGCTGGGCATTGGGAAGGGGG	0	0
SQSTM1	chr5	179261237	179261255	rs1159646645	179261249	G	A	0	GGGGGGGTGGGGGGTGGGG	GGGGGGGTGGGGGATGGGG	0	0
NFIX	chr19	13129145	13129165	rs1159671403	13129164	G	C	0	GGGGCGGGGGGGGGGGGGGGG	GGGGCGGGGGGGGGGGGGGGC	0	0
SEPT9	chr17	75461696	75461719	rs1159672129	75461714	T	G	0	GGGATGGGTGGGGCTGGGGTGGGG	GGGATGGGTGGGGCTGGGGGGGGG	0	0
COL6A1	chr21	47420543	47420571	rs1159696971	47420547	A	G	0	GGGGAAGGGGGGAGGCCGGGGAAGGAGGG	GGGGAGGGGGGGAGGCCGGGGAAGGAGGG	0	0
ITGA3	chr17	48156442	48156468	rs1159713169	48156454	G	A	0	GGGCCCAATGGGGGAGGGGCTGGTGGG	GGGCCCAATGGGGAAGGGGCTGGTGGG	0	0
NCF1	chr7	74203326	74203351	rs1159721220	74203342	G	A	0	GGGCGGGGCCAGTGGGCGGGGCGGGG	GGGCGGGGCCAGTGGGCAGGGCGGGG	0	0
ERBB2	chr17	37866161	37866184	rs1159732316	37866182	G	A	0	GGGAAGGGGAGGGCTGGGGCCGGG	GGGAAGGGGAGGGCTGGGGCCGAG	0	0
SH3BP2	chr4	2794972	2795002	rs1159753965	2794997	C	T	0	GGGTCTCGGGGGTCTCGGGGGAGTCTCGGGG	GGGTCTCGGGGGTCTCGGGGGAGTCTTGGGG	0	0
COL1A2	chr7	94023902	94023918	rs1159848941	94023910	A	G	0	GGGCGGGGGAGGGCGGG	GGGCGGGGGGGGGCGGG	0	0
GPHN	chr14	67304163	67304184	rs1159868788	67304171	G	C	0	GGGGTGGGGGGAGGGGGGAGGG	GGGGTGGGGCGAGGGGGGAGGG	0	0
ATP2C1	chr3	130587507	130587525	rs1159947392	130587519	G	C	0	GGGAGGGAGGTGGGGGGGG	GGGAGGGAGGTGGCGGGGG	0	0
NCF4	chr22	37264688	37264715	rs1159961072	37264703	A	G	0	GGGGAGTGGGCTGTGAAGGGAGGGAGGG	GGGGAGTGGGCTGTGAGGGGAGGGAGGG	0	0
DPP10	chr2	115919137	115919165	rs1160066877	115919158	T	G	0	GGGAGCCCCCGGGGGCGGGCGGTGGGGGG	GGGAGCCCCCGGGGGCGGGCGGGGGGGGG	0	0
VPS13B	chr8	100830290	100830318	rs1160084641	100830302	G	A	0	GGGTTAGGGGTAGGGTGGGACTGTGGGGG	GGGTTAGGGGTAGAGTGGGACTGTGGGGG	1	1
CACNA1H	chr16	1254971	1254997	rs1160088105	1254976	G	A	0	GGGGAGGGGTGGGAGCCGCGGGTGGGG	GGGGAGAGGTGGGAGCCGCGGGTGGGG	0	0
MEGF8	chr19	42872821	42872846	rs1160106938	42872828	G	A	0	GGGCTTTGGGCACTGGGGGAGAGGGG	GGGCTTTGAGCACTGGGGGAGAGGGG	0	0
CDKAL1	chr6	20707183	20707202	rs1160188222	20707189	A	G	0	GGGGGTGAGGGTGGGTGGGG	GGGGGTGGGGGTGGGTGGGG	0	0
ST3GAL3	chr1	44337400	44337428	rs1160299275	44337420	T	G	0	GGGATGTGGGAAAGGATGGGGTGGGAGGG	GGGATGTGGGAAAGGATGGGGGGGGAGGG	0	0
KIT	chr4	55575285	55575311	rs1160325951	55575304	A	G	0	GGGTGGTGGGGGGAGGGCGGAGGCGGG	GGGTGGTGGGGGGAGGGCGGGGGCGGG	0	0
MXI1	chr10	111986298	111986321	rs1160361150	111986309	G	A	0	GGGGAGGGGCGTGTGAGGGAGGGG	GGGGAGGGGCGTATGAGGGAGGGG	0	0
MUC5B	chr11	1245716	1245745	rs1160406498	1245719	T	G	0	GGGTTGGGGAGGGGCTGTCTGGGGCAGGGG	GGGTGGGGGAGGGGCTGTCTGGGGCAGGGG	0	0
ALDH2	chr12	112241850	112241879	rs1160491288	112241866	T	G	0	GGGGGATTGGGGTCTGTTGGGGGCTCGGGG	GGGGGATTGGGGTCTGTGGGGGGCTCGGGG	0	0
CDKAL1	chr6	20798995	20799016	rs1160491853	20799011	G	T	0	GGGATGGGGGGAGGGGGGAGGG	GGGATGGGGGGAGGGGGTAGGG	0	0
CHD7	chr8	61673902	61673923	rs1160505727	61673908	G	C	0	GGGGTGGGGGGAGGGGGGAGGG	GGGGTGGCGGGAGGGGGGAGGG	0	0
RNF213	chr17	78351031	78351050	rs1160538675	78351032	G	A	0	GGGAGAAGGGAGGGACTGGG	GGAAGAAGGGAGGGACTGGG	1	1
RNF213	chr17	78329180	78329209	rs1160550364	78329202	A	T	0	GGGAAGAAGCGGGGTGAATGGGAATGGGGG	GGGAAGAAGCGGGGTGAATGGGATTGGGGG	0	0
ADCK3	chr1	227163925	227163951	rs1160565769	227163939	C	T	0	GGGGCTGTGGGACTGCGGGGCTGTGGG	GGGGCTGTGGGACTGTGGGGCTGTGGG	1	1
CAPN5	chr11	76826867	76826891	rs11605991	76826884	G	T	0	GGGTGCGGGAGGGGAGCAGGGAGGG	GGGTGCGGGAGGGGAGCATGGAGGG	0	0
SMAD6	chr15	66997657	66997685	rs1160650315	66997675	T	G	0	GGGCATTGATGGGGGCAGGTGGGGAGGGG	GGGCATTGATGGGGGCAGGGGGGGAGGGG	0	0
GPR98	chr5	90082056	90082085	rs1160667116	90082064	T	G	0	GGGGCCTATTGGGGGGTGGGGGGCTAGGGG	GGGGCCTATGGGGGGGTGGGGGGCTAGGGG	0	0
ADCK3	chr1	227163829	227163855	rs1160723180	227163832	C	A	0	GGGGCTGCGGGACTGCGGGGCTGTGGG	GGGGATGCGGGACTGCGGGGCTGTGGG	1	1
VCL	chr10	75785464	75785485	rs1160849659	75785474	A	G	0	GGGAGGGAGGGAGGGAGGAGGG	GGGAGGGAGGGGGGGAGGAGGG	0	0
LAMA2	chr6	129767647	129767675	rs1160852170	129767669	G	A	0	GGGAAGGGGAGGAGAGGGGAGGGGAGGGG	GGGAAGGGGAGGAGAGGGGAGGGAAGGGG	0	0
KRT86	chr12	52696615	52696635	rs1160872217	52696623	G	C	0	GGGTGGGGGGTGGGGGGGGGG	GGGTGGGGGCTGGGGGGGGGG	0	0
EIF2B5	chr3	184077764	184077789	rs1160872750	184077768	T	G	0	GGGGCTGGGATGGGGGGGAGGGAGGG	GGGGCGGGGATGGGGGGGAGGGAGGG	0	0
CAMTA1	chr1	7775232	7775253	rs116089101	7775252	G	A	0	GGGGGAATGGGCTGGGACAGGG	GGGGGAATGGGCTGGGACAGGA	1	1
CNTNAP2	chr7	146722470	146722493	rs1160925631	146722474	G	C	0	GGGGAGGGGAGGAAGGGGAGGGGG	GGGGACGGGAGGAAGGGGAGGGGG	0	0
PALLD	chr4	169444385	169444402	rs1160971001	169444393	A	G	0	GGGGAGGGGAGGGGAGGG	GGGGAGGGGGGGGGAGGG	0	0
ERC1	chr12	1596929	1596943	rs11610372	1596936	G	A	0	GGGAGGGAGGGAGGG	GGGAGGGAAGGAGGG	0	0
KALRN	chr3	124239028	124239053	rs1161136126	124239029	G	C	0	GGGAATGAGGGAGCAGGGTAGAAGGG	GGCAATGAGGGAGCAGGGTAGAAGGG	0	0
SORL1	chr11	121457393	121457423	rs1161171870	121457415	G	C	0	GGGGTAGAGTGGGGGGGGGGGCGGGGGGGGG	GGGGTAGAGTGGGGGGGGGGGCGCGGGGGGG	0	0
BPGM	chr7	134350217	134350238	rs1161339950	134350229	G	C	0	GGGGTTGGGGGAGGGGGGAGGG	GGGGTTGGGGGAGCGGGGAGGG	0	0
PTPRQ	chr12	81069549	81069576	rs1161369560	81069574	G	A	0	GGGATGGGGATTTAGGGGTGGGGCAGGG	GGGATGGGGATTTAGGGGTGGGGCAGAG	0	0
RBPJ	chr4	26289215	26289247	rs1161376500	26289217	G	C	0	GGGGAGGGGAGGGGAGGGGAGGGGAGGGGAGGG	GGGCAGGGGAGGGGAGGGGAGGGGAGGGGAGGG	0	0
MRPS22	chr3	139020042	139020068	rs1161406111	139020058	G	A	0	GGGCACCAGGGCAGGGAGGGCTCGGGG	GGGCACCAGGGCAGGGAAGGCTCGGGG	0	0
CACNA1H	chr16	1254845	1254872	rs1161466410	1254861	G	A	0	GGGGAGGGGTGGGAGCCGCGGGTGGGGG	GGGGAGGGGTGGGAGCCACGGGTGGGGG	0	0
SCN1B	chr19	35522210	35522239	rs1161536778	35522224	T	G	0	GGGATGCTGGGGACATGGGGGTCAAGGGGG	GGGATGCTGGGGACAGGGGGGTCAAGGGGG	1	1
CAMTA1	chr1	7752043	7752065	rs1161542351	7752062	G	C	0	GGGAGGGAGGGAGGGAAGGAGGG	GGGAGGGAGGGAGGGAAGGACGG	0	0
FGGY	chr1	60058458	60058479	rs1161549920	60058475	A	C	0	GGGGTGGGGGGACGGGGGAGGG	GGGGTGGGGGGACGGGGGCGGG	0	0
ROBO2	chr3	77648649	77648670	rs1161672306	77648652	T	G	0	GGGGTGGGGGGAGGGGGGAGGG	GGGGGGGGGGGAGGGGGGAGGG	0	0
WFS1	chr4	6277306	6277335	rs1161673352	6277331	G	C	0	GGGGATGCACGGGGGTGGGGTGGGGGGGGG	GGGGATGCACGGGGGTGGGGTGGGGGCGGG	0	0
HSD11B2	chr16	67466544	67466567	rs1161702353	67466546	T	G	0	GGGTGTGGGGGTGGGGAGAAGGGG	GGGGGTGGGGGTGGGGAGAAGGGG	0	0
USB1	chr16	58034811	58034834	rs1161772691	58034827	C	T	0	GGGCTTAGGGGAGGGGGCTCCGGG	GGGCTTAGGGGAGGGGGTTCCGGG	0	0
SYNE2	chr14	64650671	64650700	rs1161776221	64650681	G	A	0	GGGAGAGGGAGGGGGTGGGGAGGGGGAGGG	GGGAGAGGGAGAGGGTGGGGAGGGGGAGGG	0	0
VANGL2	chr1	160385155	160385179	rs1161782991	160385164	T	G	0	GGGCTTGGGGTTGGGTCATTCTGGG	GGGCTTGGGGGTGGGTCATTCTGGG	0	0
CD81	chr11	2412113	2412127	rs1161786318	2412119	A	G	0	GGGAGGGAGGGAGGG	GGGAGGGGGGGAGGG	0	0
CNTNAP2	chr7	147499893	147499913	rs1161789194	147499903	A	G	0	GGGAGAGGGAGAGGGAGAGGG	GGGAGAGGGAGGGGGAGAGGG	0	0
CAMTA1	chr1	6845771	6845797	rs1161846201	6845782	G	T	0	GGGGAGGGGGCCGGCGGGGTGGGGGGG	GGGGAGGGGGCCTGCGGGGTGGGGGGG	0	0
OSMR	chr5	38888514	38888535	rs1161866704	38888516	T	G	0	GGGTGGGGTGGCGGGGGTGGGG	GGGGGGGGTGGCGGGGGTGGGG	0	0
GNA11	chr19	3108531	3108555	rs1161871361	3108534	T	G	0	GGGCTGGGGGCATGCTGGGAGGGGG	GGGCGGGGGGCATGCTGGGAGGGGG	0	0
IYD	chr6	150693772	150693794	rs1161905563	150693776	G	T	0	GGGTGGGGTGGGGGTGGTGAGGG	GGGTGTGGTGGGGGTGGTGAGGG	0	0
CNTNAP2	chr7	147833139	147833162	rs1161952381	147833142	A	G	0	GGGGAAGGGAAGGGAGGGGAAGGG	GGGGGAGGGAAGGGAGGGGAAGGG	0	0
ARHGEF10	chr8	1790210	1790240	rs1161955686	1790233	C	T	0	GGGCCGCGGCGGGAACTGGGGCCGCGGCGGG	GGGCCGCGGCGGGAACTGGGGCCGTGGCGGG	1	1
MSRB3	chr12	65727307	65727336	rs1161997707	65727323	T	C	0	GGGAAGGTGGGTTATGTTGGGAGTAATGGG	GGGAAGGTGGGTTATGTCGGGAGTAATGGG	0	0
HMCN1	chr1	185709811	185709834	rs1162033700	185709827	T	G	0	GGGCAGGGGGTGGGGGGTAGGGGG	GGGCAGGGGGTGGGGGGGAGGGGG	0	0
IL10RA	chr11	117859228	117859247	rs1162094205	117859237	A	G	0	GGGAAGAGGGAGGGGGAGGG	GGGAAGAGGGGGGGGGAGGG	0	0
CNTNAP2	chr7	147849378	147849399	rs1162100017	147849383	G	C	0	GGGCAGGGGGCTAGGGAATGGG	GGGCAGCGGGCTAGGGAATGGG	0	0
KCNQ1	chr11	2851166	2851187	rs1162133880	2851169	A	G	0	GGGGAGGGGGAGGGGGAGGGGG	GGGGGGGGGGAGGGGGAGGGGG	0	0
CACNA1C	chr12	2270428	2270455	rs1162255240	2270431	T	G	0	GGGATGGGAAGGGGGTCTCTGGGAGGGG	GGGAGGGGAAGGGGGTCTCTGGGAGGGG	0	0
CNTNAP2	chr7	146378537	146378563	rs1162260887	146378559	A	G	0	GGGTGGCAGGGTGGCGGGGGGAGAGGG	GGGTGGCAGGGTGGCGGGGGGAGGGGG	0	0
POLR3B	chr12	106797589	106797610	rs1162382722	106797592	T	G	0	GGGGTGGGGGGAGGGGGGAGGG	GGGGGGGGGGGAGGGGGGAGGG	0	0
PLCB4	chr20	9125395	9125426	rs1162389556	9125406	G	A	0	GGGGAAGGAGGGGAAGGAGGGGAATGAGGGGG	GGGGAAGGAGGGAAAGGAGGGGAATGAGGGGG	0	0
C10orf11	chr10	78238656	78238678	rs1162390545	78238667	A	G	0	GGGGTGTGGGGGAGGGGGGAGGG	GGGGTGTGGGGGGGGGGGGAGGG	0	0
CNTNAP2	chr7	147833139	147833162	rs1162411896	147833140	G	A	0	GGGGAAGGGAAGGGAGGGGAAGGG	GGAGAAGGGAAGGGAGGGGAAGGG	0	0
CNTNAP2	chr7	146378507	146378532	rs1162425715	146378520	G	T	0	GGGTCCTGTGGGTGGGGGGTGGAGGG	GGGTCCTGTGGGTGTGGGGTGGAGGG	0	0
SMOC2	chr6	168860301	168860324	rs1162442555	168860319	G	C	0	GGGGTGGGTGGGCCCTGGGGTGGG	GGGGTGGGTGGGCCCTGGGCTGGG	0	0
SMOC1	chr14	70391492	70391522	rs1162487038	70391510	G	A	0	GGGGAGGTAAGGGAGGTAGGGGAGGTAGGGG	GGGGAGGTAAGGGAGGTAGAGGAGGTAGGGG	0	0
FAM20C	chr7	216268	216290	rs1162569231	216278	G	A	0	GGGGCTGGGTGGGGGGAGCAGGG	GGGGCTGGGTGAGGGGAGCAGGG	0	0
PRCD	chr17	74536334	74536357	rs1162589027	74536353	T	G	0	GGGGGGGGGGGGCATGGGGCTGGG	GGGGGGGGGGGGCATGGGGCGGGG	0	0
C7	chr5	40972272	40972292	rs1162782327	40972280	T	A	0	GGGGAGGGGTGGGAGAGGGGG	GGGGAGGGGAGGGAGAGGGGG	0	0
ATP2C1	chr3	130587507	130587525	rs1162782772	130587516	T	G	0	GGGAGGGAGGTGGGGGGGG	GGGAGGGAGGGGGGGGGGG	0	0
HFE	chr6	26089337	26089368	rs1162854767	26089363	A	G	0	GGGGGGGGGGGGCGGCGTGGGGGTGGGAAGGG	GGGGGGGGGGGGCGGCGTGGGGGTGGGGAGGG	0	0
KCNA1	chr12	5019672	5019704	rs1162970312	5019677	T	G	0	GGGGGTTGGGGGGACCGGGTGGGGGAGGCCGGG	GGGGGTGGGGGGGACCGGGTGGGGGAGGCCGGG	1	1
ANK2	chr4	114009490	114009515	rs1163010756	114009501	G	C	0	GGGAATGGGCAAGGGGACAAGCTGGG	GGGAATGGGCAACGGGACAAGCTGGG	1	1
DACT1	chr14	59104482	59104510	rs1163076699	59104495	A	G	0	GGGAGGAGGCGGGGAGGGGCGAGGAGGGG	GGGAGGAGGCGGGGGGGGGCGAGGAGGGG	0	0
ABCG8	chr2	44103692	44103723	rs1163152570	44103718	A	G	0	GGGAGACCATGGGAATATGGGGAGACTATGGG	GGGAGACCATGGGAATATGGGGAGACTGTGGG	2	2
CAMTA1	chr1	6845771	6845797	rs1163167406	6845784	C	G	0	GGGGAGGGGGCCGGCGGGGTGGGGGGG	GGGGAGGGGGCCGGGGGGGTGGGGGGG	0	0
CA4	chr17	58245828	58245848	rs1163170889	58245834	C	G	0	GGGGGGGCAGGTGGGGAAGGG	GGGGGGGGAGGTGGGGAAGGG	0	0
WWOX	chr16	79101519	79101543	rs1163171076	79101526	T	G	0	GGGTGGGGTGGGGGGCGGGGGGGGG	GGGTGGGGGGGGGGGCGGGGGGGGG	0	0
MEIS1	chr2	66723182	66723206	rs1163172790	66723196	G	T	0	GGGAAAGAAAGGGCTGGGCCAGGGG	GGGAAAGAAAGGGCTTGGCCAGGGG	0	0
FARS2	chr6	5269572	5269593	rs1163187660	5269582	A	G	0	GGGGTTGGGGGAGGGGGGAGGG	GGGGTTGGGGGGGGGGGGAGGG	0	0
EDARADD	chr1	236550111	236550129	rs1163286414	236550120	T	G	0	GGGAGGGAGGTGGGGGGGG	GGGAGGGAGGGGGGGGGGG	0	0
KCNJ5	chr11	128786587	128786616	rs1163299281	128786612	G	A	0	GGGGCTGGGTGGGTCCAGGGAGGCCAGGGG	GGGGCTGGGTGGGTCCAGGGAGGCCAAGGG	0	0
THRA	chr17	38219014	38219045	rs1163331322	38219036	G	T	0	GGGGGTCCCGGGGCGCGGCAGGGGGCGGGGGG	GGGGGTCCCGGGGCGCGGCAGGGTGCGGGGGG	0	0
PRPF31	chr19	54629193	54629213	rs1163367546	54629211	G	A	0	GGGTGGGCCTGGGGCTCGGGG	GGGTGGGCCTGGGGCTCGGAG	0	0
NOS3	chr7	150696615	150696644	rs1163408311	150696640	T	G	0	GGGGTAGGGGGTGGCAGGGGTGTGTGTGGG	GGGGTAGGGGGTGGCAGGGGTGTGTGGGGG	0	0
EDARADD	chr1	236550484	236550502	rs1163457313	236550494	G	A	0	GGGAGGGAGGTGGGGGGGG	GGGAGGGAGGTAGGGGGGG	0	0
MYH14	chr19	50729580	50729603	rs1163507490	50729601	G	A	0	GGGTCTGAGGGAGGAGGGGCTGGG	GGGTCTGAGGGAGGAGGGGCTGAG	0	0
MYH14	chr19	50729692	50729717	rs1163551387	50729705	A	G	0	GGGTCTGAGGGAGGAGGGGCTGGGGG	GGGTCTGAGGGAGGGGGGGCTGGGGG	0	0
SYNGAP1	chr6	33388689	33388716	rs1163566330	33388707	A	G	0	GGGAACGGTGGGGGAGGGGAGACCAGGG	GGGAACGGTGGGGGAGGGGGGACCAGGG	1	1
OTOG	chr11	17653559	17653588	rs116359868	17653582	A	G	0	GGGCAGGGAGGGGAGGAGCTGGGCACTGGG	GGGCAGGGAGGGGAGGAGCTGGGCGCTGGG	0	0
CNTNAP2	chr7	147833111	147833137	rs1163611791	147833132	G	A	0	GGGAGGGAGGGAGGGAGGGAGGGAGGG	GGGAGGGAGGGAGGGAGGGAGGAAGGG	0	0
RAD51B	chr14	68542487	68542511	rs1163666319	68542500	A	G	0	GGGGGTGAGGGCTCACAGGGAAGGG	GGGGGTGAGGGCTCGCAGGGAAGGG	0	0
KCNQ1	chr11	2695209	2695229	rs1163679677	2695218	T	G	0	GGGGGTGGGGTGGGGGGAGGG	GGGGGTGGGGGGGGGGGAGGG	0	0
BFSP2	chr3	133144691	133144713	rs1163772796	133144710	G	A	0	GGGAAAGGAAGGGAAGGGAAGGG	GGGAAAGGAAGGGAAGGGAAAGG	0	0
SERPINF2	chr17	1648377	1648404	rs1163782791	1648385	T	G	0	GGGGTGGGGTGGAGGGGGAAGAAGAGGG	GGGGTGGGGGGGAGGGGGAAGAAGAGGG	0	0
F7	chr13	113762937	113762965	rs1163802204	113762948	G	A	0	GGGTGTCCCGGGGGCGTGGGTGTCCCGGG	GGGTGTCCCGGGAGCGTGGGTGTCCCGGG	0	0
COL6A1	chr21	47410462	47410494	rs1163840225	47410482	G	A	0	GGGGAAGGACGGGGAGGGACGGGGAGGGATGGG	GGGGAAGGACGGGGAGGGACGAGGAGGGATGGG	0	0
HFE	chr6	26089337	26089368	rs1163872168	26089344	G	A	0	GGGGGGGGGGGGCGGCGTGGGGGTGGGAAGGG	GGGGGGGGAGGGCGGCGTGGGGGTGGGAAGGG	0	0
GNA11	chr19	3115972	3116001	rs1163872854	3115974	G	A	0	GGGGAGGAGGGGTCATAGGGACTGAGTGGG	GGGAAGGAGGGGTCATAGGGACTGAGTGGG	1	1
SERPINF2	chr17	1657966	1657989	rs1163875886	1657974	A	G	0	GGGGAGTTTAGGGTGGGGGGGGGG	GGGGAGTTTGGGGTGGGGGGGGGG	0	0
CACNA1H	chr16	1233089	1233112	rs1163901915	1233098	T	A	0	GGGACTGGGGTGGGACACGGTGGG	GGGACTGGGGAGGGACACGGTGGG	2	2
TCF7L2	chr10	114918160	114918187	rs1163985741	114918168	A	G	0	GGGATGAGGAGGGGGCGGGGCTTAGGGG	GGGATGAGGGGGGGGCGGGGCTTAGGGG	0	0
RAI1	chr17	17686544	17686564	rs1164014033	17686549	G	T	0	GGGAGGGGACTGGGCGCGGGG	GGGAGGTGACTGGGCGCGGGG	1	1
RBPJ	chr4	26216008	26216023	rs1164021794	26216021	G	A	0	GGGGAGGGAGGGAGGG	GGGGAGGGAGGGAGAG	0	0
FLNC	chr7	128486243	128486273	rs1164036087	128486246	A	G	0	GGGCAGGGCTGGGCAAGTGGGCAGGGCCGGG	GGGCGGGGCTGGGCAAGTGGGCAGGGCCGGG	0	0
CLN8	chr8	1712063	1712084	rs1164049331	1712070	G	A	0	GGGAGCCCGGGTGAGGGCCGGG	GGGAGCCCAGGTGAGGGCCGGG	0	0
F7	chr13	113762341	113762370	rs1164063040	113762368	G	A	0	GGGTGTCCCGGGAGTGTGGGTGTCCCGGGG	GGGTGTCCCGGGAGTGTGGGTGTCCCGGAG	0	0
CCM2	chr7	45039728	45039760	rs1164067015	45039733	G	C	0	GGGGAAGGTGGGGCCTGGGCGGGGCGGAGGGGG	GGGGAACGTGGGGCCTGGGCGGGGCGGAGGGGG	0	0
CCM2	chr7	45039728	45039760	rs1164138646	45039754	A	G	0	GGGGAAGGTGGGGCCTGGGCGGGGCGGAGGGGG	GGGGAAGGTGGGGCCTGGGCGGGGCGGGGGGGG	0	0
PLCG2	chr16	81785968	81785990	rs1164174359	81785988	G	A	0	GGGAGGGGACTGTGAGGGTTGGG	GGGAGGGGACTGTGAGGGTTGAG	1	1
SEPT9	chr17	75475838	75475862	rs1164175173	75475856	T	G	0	GGGGAGGGTTGAGGGATGCTGGGGG	GGGGAGGGTTGAGGGATGCGGGGGG	0	0
MED25	chr19	50321929	50321951	rs1164294978	50321947	A	G	0	GGGTCTGAGGGAGGGAGAAAGGG	GGGTCTGAGGGAGGGAGAAGGGG	0	0
SYNGAP1	chr6	33405796	33405825	rs1164350039	33405821	A	G	0	GGGGGATCTGGGGGCATGGGTTCGGGAGGG	GGGGGATCTGGGGGCATGGGTTCGGGGGGG	0	0
RTEL1	chr20	62294255	62294273	rs1164367985	62294260	G	A	0	GGGTGGGACCAGGGTCGGG	GGGTGGAACCAGGGTCGGG	1	1
BICC1	chr10	60366174	60366194	rs1164422724	60366193	G	T	0	GGGGTGGGGGAGGGGGGAGGG	GGGGTGGGGGAGGGGGGAGGT	0	0
SLC24A1	chr15	65929698	65929724	rs1164478001	65929700	A	G	0	GGGAGGGTGGGAGGGGGCATGGAAGGG	GGGGGGGTGGGAGGGGGCATGGAAGGG	0	0
PCSK9	chr1	55521893	55521916	rs1164483755	55521910	G	A	0	GGGTAGGGGGCGGAGGGCGGAGGG	GGGTAGGGGGCGGAGGGCAGAGGG	0	0
THRA	chr17	38231548	38231578	rs1164546008	38231556	T	G	0	GGGAGAGGGTGGGGGTGGGGGTGCTCCGGGG	GGGAGAGGGGGGGGGTGGGGGTGCTCCGGGG	0	0
PTPRO	chr12	15630286	15630307	rs1164585596	15630298	G	T	0	GGGGAGGGGGGAGGGGGGAGGG	GGGGAGGGGGGAGTGGGGAGGG	0	0
DGKE	chr17	54911923	54911943	rs1164595936	54911936	A	G	0	GGGGCGGGTTGGGGAGTGGGG	GGGGCGGGTTGGGGGGTGGGG	0	0
CRELD1	chr3	9982379	9982404	rs1164604619	9982390	G	A	0	GGGAGGCCATGGGGAGAGGGAGAGGG	GGGAGGCCATGGAGAGAGGGAGAGGG	0	0
EGFR	chr7	55288998	55289018	rs1164621975	55289007	G	A	0	GGGAGAGGGAGAGGGAGAGGG	GGGAGAGGGAAAGGGAGAGGG	0	0
SPG7	chr16	89573218	89573243	rs1164624248	89573238	G	C	0	GGGATGAAGGGCAGGGAGAGGGAGGG	GGGATGAAGGGCAGGGAGAGGCAGGG	0	0
SMOC2	chr6	169004005	169004032	rs1164646853	169004007	T	G	0	GGGTGTCATAGGGGTGGGGCAGATGGGG	GGGGGTCATAGGGGTGGGGCAGATGGGG	0	0
ST3GAL3	chr1	44233347	44233363	rs1164734660	44233348	G	T	0	GGGTGGGGGGGTAGGGG	GGTTGGGGGGGTAGGGG	0	0
CNTNAP2	chr7	146722499	146722525	rs1164782297	146722508	A	G	0	GGGGGAGGGGAAGGGGGAGGGGAGGGG	GGGGGAGGGGGAGGGGGAGGGGAGGGG	0	0
BCKDHB	chr6	80999964	80999988	rs1164855213	80999969	G	A	0	GGGCTGGGGTGGGAGGGGAGCAGGG	GGGCTGAGGTGGGAGGGGAGCAGGG	0	0
CTDP1	chr18	77510975	77510991	rs1165009634	77510981	A	G	0	GGGAGGGAGGGGCTGGG	GGGAGGGGGGGGCTGGG	0	0
GRHL2	chr8	102533444	102533466	rs1165038020	102533448	A	G	0	GGGCCATGGGGTGGGGGTGAGGG	GGGCCGTGGGGTGGGGGTGAGGG	0	0
GPHN	chr14	67012694	67012715	rs1165234637	67012707	G	A	0	GGGCGGCTTCGGGGGGGAGGGG	GGGCGGCTTCGGGGAGGAGGGG	0	0
POLD1	chr19	50920975	50920996	rs1165297537	50920987	T	G	0	GGGAGGGGGCGGGTGGGCTGGG	GGGAGGGGGCGGGGGGGCTGGG	0	0
SPINT2	chr19	38742816	38742843	rs1165361136	38742823	T	G	0	GGGCAGGTTGGGGCCGGGGGTGGTGGGG	GGGCAGGTGGGGGCCGGGGGTGGTGGGG	0	0
CACNA1H	chr16	1204055	1204081	rs1165375244	1204077	G	C	0	GGGGGGCGGGGGGCGGGGGGCGTGGGG	GGGGGGCGGGGGGCGGGGGGCGTCGGG	0	0
FAM20C	chr7	216268	216290	rs1165391428	216269	G	A	0	GGGGCTGGGTGGGGGGAGCAGGG	GGAGCTGGGTGGGGGGAGCAGGG	0	0
CHRM3	chr1	240074025	240074053	rs1165392942	240074040	A	G	0	GGGGCTGTTTGGGGAGAGGGAGGGGAGGG	GGGGCTGTTTGGGGAGGGGGAGGGGAGGG	0	0
JPH3	chr16	87636051	87636081	rs1165410572	87636063	C	G	0	GGGGGGCGGGGGGCGGGCGGGGGCGCGCGGG	GGGGGGCGGGGGGGGGGCGGGGGCGCGCGGG	0	0
NF1	chr17	29614950	29614971	rs11654417	29614960	A	G	0	GGGGTGGGGGGAGGGGGGAGGG	GGGGTGGGGGGGGGGGGGAGGG	0	0
ADK	chr10	76353945	76353965	rs1165457808	76353956	T	G	0	GGGGTGGGGGGTTGGGGAGGG	GGGGTGGGGGGTGGGGGAGGG	0	0
RBPJ	chr4	26241350	26241368	rs1165524909	26241355	G	A	0	GGGGAGGGGAGGGGAGGGG	GGGGAGAGGAGGGGAGGGG	0	0
BEAN1	chr16	66508475	66508497	rs1165593706	66508476	G	A	0	GGGAGGGAGAGAGGGAGGGAGGG	GGAAGGGAGAGAGGGAGGGAGGG	0	0
KCNQ1	chr11	2465941	2465971	rs1165759671	2465970	G	T	0	GGGCTCGGGCGGGGGTGGGGGTGGGGGCGGG	GGGCTCGGGCGGGGGTGGGGGTGGGGGCGGT	0	0
SETBP1	chr18	42475203	42475219	rs1165856833	42475211	A	G	0	GGGAGGGGGAGGGAGGG	GGGAGGGGGGGGGAGGG	0	0
ERBB3	chr12	56490741	56490759	rs1165953866	56490745	T	G	0	GGGGGTGGGGGGGCCTGGG	GGGGGGGGGGGGGCCTGGG	0	0
F7	chr13	113762146	113762173	rs1165968948	113762148	G	A	0	GGGGGCGTGGGTGTCCCGGGGGCGTGGG	GGGAGCGTGGGTGTCCCGGGGGCGTGGG	0	0
STK11	chr19	1195287	1195311	rs1166004904	1195308	G	T	0	GGGTGGGGGTGAACGGGGGCCTGGG	GGGTGGGGGTGAACGGGGGCCTTGG	0	0
RAI1	chr17	17641595	17641627	rs1166012312	17641612	T	G	0	GGGCACTGAGGGGTGGGCTGGGGTGGGTGAGGG	GGGCACTGAGGGGTGGGCGGGGGTGGGTGAGGG	0	0
GARS	chr7	30647153	30647181	rs1166087792	30647175	T	G	0	GGGCCTGTCGGGGGGTGGGAGGCTGGGGG	GGGCCTGTCGGGGGGTGGGAGGCGGGGGG	0	0
WWOX	chr16	79101519	79101543	rs1166122567	79101532	G	A	0	GGGTGGGGTGGGGGGCGGGGGGGGG	GGGTGGGGTGGGGGACGGGGGGGGG	0	0
POLD1	chr19	50887774	50887798	rs1166150722	50887794	T	G	0	GGGCAGGGGCCAGGGGTTTCCTGGG	GGGCAGGGGCCAGGGGTTTCCGGGG	0	0
TBX1	chr22	19748116	19748141	rs1166164795	19748137	G	A	0	GGGCGGGCTGGGGGCCGGGGAGGGGG	GGGCGGGCTGGGGGCCGGGGAGAGGG	0	0
TSC2	chr16	2102870	2102892	rs1166165971	2102881	G	A	0	GGGCAGGGGCATGGGGTCGAGGG	GGGCAGGGGCATAGGGTCGAGGG	0	0
FERMT3	chr11	63986840	63986866	rs1166240414	63986853	C	T	0	GGGCCTGGGGGCACCAGGGCAGGTGGG	GGGCCTGGGGGCACTAGGGCAGGTGGG	0	0
LAMA2	chr6	129529858	129529872	rs1166277311	129529864	A	C	0	GGGAGGGAGGGAGGG	GGGAGGGCGGGAGGG	0	0
ANO3	chr11	26244370	26244397	rs1166277885	26244374	G	T	0	GGGTGGTGTAGGGCAGTGGGATCCTGGG	GGGTGTTGTAGGGCAGTGGGATCCTGGG	0	0
TENM3	chr4	183474534	183474554	rs1166314909	183474537	T	G	0	GGGGTGGGGGGAGGGGGAGGG	GGGGGGGGGGGAGGGGGAGGG	0	0
EGFR	chr7	55288974	55288994	rs1166366692	55288976	A	T	0	GGGAGAGGGAGAGGGAGAGGG	GGGTGAGGGAGAGGGAGAGGG	0	0
ACVRL1	chr12	52314709	52314729	rs1166408521	52314724	G	T	0	GGGGGCTGGGGGGGTGGGGGG	GGGGGCTGGGGGGGTGTGGGG	0	0
PCNT	chr21	47745199	47745226	rs1166456684	47745223	G	A	0	GGGGACGCGGGGCTAGGCCGGGGAAGGG	GGGGACGCGGGGCTAGGCCGGGGAAAGG	0	0
C10orf11	chr10	77472187	77472211	rs1166469963	77472202	T	G	0	GGGCGGGTGGGGGCGGTTGGGGGGG	GGGCGGGTGGGGGCGGGTGGGGGGG	0	0
DOK7	chr4	3501632	3501659	rs1166474977	3501638	T	G	0	GGGAAGGTGCGGGGCGAGGGGCGCAGGG	GGGAAGGGGCGGGGCGAGGGGCGCAGGG	0	0
HGSNAT	chr8	43036300	43036320	rs1166485917	43036305	G	C	0	GGGAGAGGGAGAGGGAGAGGG	GGGAGACGGAGAGGGAGAGGG	0	0
CACNA1H	chr16	1255013	1255040	rs1166611993	1255021	T	G	0	GGGGAGGGGTGGGAGCCACGGGTGGGGG	GGGGAGGGGGGGGAGCCACGGGTGGGGG	0	0
KCNQ1	chr11	2581763	2581779	rs1166655512	2581767	G	T	0	GGGGGGGCGGGGGGGGG	GGGGGTGCGGGGGGGGG	0	0
FAH	chr15	80444959	80444986	rs1166664522	80444985	G	A	0	GGGGCGAGGGGAGGGGCGGGGCGAGGGG	GGGGCGAGGGGAGGGGCGGGGCGAGGGA	0	0
GNA11	chr19	3095000	3095022	rs1166680888	3095007	G	C	0	GGGTCGGGGCGGGGCCCTCCGGG	GGGTCGGGCCGGGGCCCTCCGGG	0	0
LAMA2	chr6	129540973	129540991	rs1166746989	129540985	G	A	0	GGGGTGGGGGGGAGGGGGG	GGGGTGGGGGGGAAGGGGG	0	0
PROC	chr2	128180315	128180333	rs1166784295	128180323	A	G	0	GGGCGGGGGAGGGGCAGGG	GGGCGGGGGGGGGGCAGGG	0	0
AGRN	chr1	976383	976415	rs1166827086	976391	A	C	0	GGGGCTGGGAGGGGCCTGGGGGGCGGAGCGGGG	GGGGCTGGGCGGGGCCTGGGGGGCGGAGCGGGG	0	0
BFSP2	chr3	133144788	133144817	rs1166829367	133144805	G	A	0	GGGAGGGGAGGGGGAGGGGGAGGGGATGGG	GGGAGGGGAGGGGGAGGGAGAGGGGATGGG	0	0
ARID1B	chr6	157343267	157343287	rs1166888679	157343278	G	A	0	GGGCGGGGAGGCGGGGCGGGG	GGGCGGGGAGGCAGGGCGGGG	0	0
SEPT9	chr17	75461696	75461719	rs1166923647	75461709	T	G	0	GGGATGGGTGGGGCTGGGGTGGGG	GGGATGGGTGGGGCGGGGGTGGGG	0	0
PALLD	chr4	169420394	169420415	rs1166950699	169420395	G	A	0	GGGAGAAGGGAGGGAGGAAGGG	GGAAGAAGGGAGGGAGGAAGGG	0	0
SORL1	chr11	121355293	121355316	rs1166958624	121355313	G	A	0	GGGACGTGGGGAGGGAGAATTGGG	GGGACGTGGGGAGGGAGAATTAGG	0	0
ROBO2	chr3	77367006	77367030	rs1166995862	77367022	G	A	0	GGGCTGCTGGGGGGGCTGCTGGGGG	GGGCTGCTGGGGGGGCTACTGGGGG	0	0
HNF4A	chr20	43043324	43043348	rs1167074353	43043347	G	A	0	GGGCAGTAGTGGGCAGTGGGCGGGG	GGGCAGTAGTGGGCAGTGGGCGGGA	0	0
FLNC	chr7	128471053	128471079	rs1167106923	128471077	G	A	0	GGGGGCGAGGGCACGGGCGCTGCGGGG	GGGGGCGAGGGCACGGGCGCTGCGGAG	0	0
ROBO2	chr3	76801440	76801461	rs1167113042	76801450	A	G	0	GGGGTGGGGGTAGGGGGGAGGG	GGGGTGGGGGTGGGGGGGAGGG	0	0
PNPLA3	chr22	44351516	44351545	rs1167127233	44351517	G	T	0	GGGCCAGCAGGGCAGACGGGCGCCGCGGGG	GGTCCAGCAGGGCAGACGGGCGCCGCGGGG	0	0
HGSNAT	chr8	43036276	43036296	rs1167128113	43036282	G	T	0	GGGAGAGGGAGAGGGAGAGGG	GGGAGAGTGAGAGGGAGAGGG	0	0
MAPT	chr17	44092325	44092352	rs1167133234	44092327	A	G	0	GGGAAGGGTAGTGAGGGGATGGTGGGGG	GGGGAGGGTAGTGAGGGGATGGTGGGGG	0	0
SMAD3	chr15	67479500	67479521	rs1167148020	67479509	G	A	0	GGGTTCAAGGGGAGGGACTGGG	GGGTTCAAGGAGAGGGACTGGG	1	1
APCDD1	chr18	10472203	10472233	rs1167220171	10472211	T	G	0	GGGAGGAGATGGGAAAGGCTGGGGCTGAGGG	GGGAGGAGAGGGGAAAGGCTGGGGCTGAGGG	0	0
CNTNAP2	chr7	147263446	147263472	rs1167227934	147263450	A	G	0	GGGGGAGGGGGAAGGGGAGAAGGGGGG	GGGGGGGGGGGAAGGGGAGAAGGGGGG	0	0
MSH2	chr2	47749002	47749031	rs1167292560	47749006	A	G	0	GGGCGAGGGTGGGGGGTGTGGGGGCGGGGG	GGGCGGGGGTGGGGGGTGTGGGGGCGGGGG	0	0
GNA11	chr19	3105391	3105413	rs11673277	3105406	G	A	0	GGGGGGTTGGGGGGAAGGGGGGG	GGGGGGTTGGGGGGAAAGGGGGG	0	0
PLG	chr6	161169503	161169521	rs1167365773	161169512	G	A	0	GGGAGGAAGGGTGGGTGGG	GGGAGGAAGGATGGGTGGG	0	0
FAH	chr15	80444833	80444853	rs1167381066	80444848	C	A	0	GGGGAGGGGCGGGGCTCGGGG	GGGGAGGGGCGGGGCTAGGGG	0	0
RNF213	chr17	78248474	78248500	rs1167414925	78248478	T	G	0	GGGGGTGAGTGGGGTGTCTGGGGGGGG	GGGGGGGAGTGGGGTGTCTGGGGGGGG	0	0
CDH15	chr16	89260021	89260043	rs1167439766	89260029	T	G	0	GGGCAGGTGTGGGTGGGGAGGGG	GGGCAGGTGGGGGTGGGGAGGGG	0	0
RSPH9	chr6	43613144	43613168	rs1167439847	43613156	T	G	0	GGGGCGGGGCCCATGGGGCCAAGGG	GGGGCGGGGCCCAGGGGGCCAAGGG	0	0
POLR3B	chr12	106797589	106797610	rs1167453248	106797602	G	T	0	GGGGTGGGGGGAGGGGGGAGGG	GGGGTGGGGGGAGGTGGGAGGG	0	0
PALLD	chr4	169630741	169630763	rs1167491168	169630760	G	A	0	GGGAGGGAGGGAGGGAGGGAGGG	GGGAGGGAGGGAGGGAGGGAAGG	0	0
SLC24A4	chr14	92853451	92853475	rs1167554752	92853454	T	G	0	GGGGTGGGGTGGGGGTTCCAAGGGG	GGGGGGGGGTGGGGGTTCCAAGGGG	0	0
SMARCAD1	chr4	95136777	95136799	rs1167563216	95136781	G	A	0	GGGGGGTGGGGGGGAGGAGGGGG	GGGGGATGGGGGGGAGGAGGGGG	0	0
PACRG	chr6	163604268	163604300	rs1167605962	163604269	G	A	0	GGGTGCTCTGGGGGCTCGAAGGGCATGGAAGGG	GGATGCTCTGGGGGCTCGAAGGGCATGGAAGGG	0	0
DPP6	chr7	153763648	153763669	rs1167666042	153763667	G	A	0	GGGAGGGGTGCATGGGAAGGGG	GGGAGGGGTGCATGGGAAGGAG	0	0
F7	chr13	113763142	113763170	rs1167710509	113763157	T	A	0	GGGTGTCCCGGGGGAGTGGGTGTCCCGGG	GGGTGTCCCGGGGGAGAGGGTGTCCCGGG	0	0
ADCK3	chr1	227163877	227163903	rs1167717386	227163884	G	A	0	GGGGCTGCGGGACTGCGGGGCTGTGGG	GGGGCTGCAGGACTGCGGGGCTGTGGG	1	1
CHD7	chr8	61690650	61690671	rs1167814352	61690653	T	G	0	GGGGTGGGGGGTGGAGGGGGGG	GGGGGGGGGGGTGGAGGGGGGG	0	0
ALDOA	chr16	30076125	30076150	rs1167897505	30076128	C	G	0	GGGCCGGGGTGGGGATGGGGTTGGGG	GGGCGGGGGTGGGGATGGGGTTGGGG	0	0
DNM2	chr19	10880424	10880444	rs1167909490	10880433	T	G	0	GGGCTGGGGGTGGGGGTGGGG	GGGCTGGGGGGGGGGGTGGGG	0	0
SH3BP2	chr4	2815987	2816013	rs1167948656	2816009	T	G	0	GGGCTCATGGGGCCCCAGGGTGGTGGG	GGGCTCATGGGGCCCCAGGGTGGGGGG	0	0
F7	chr13	113762579	113762608	rs1167973101	113762604	C	T	0	GGGTGTCCCGGGGGTTGTGGGTGTCCCGGG	GGGTGTCCCGGGGGTTGTGGGTGTCCTGGG	0	0
RB1	chr13	48892157	48892179	rs116808604	48892170	G	A	0	GGGAGCCGGGGCTGGGAGCTGGG	GGGAGCCGGGGCTGAGAGCTGGG	0	0
CD81	chr11	2405527	2405552	rs1168264056	2405530	C	T	0	GGGGCGGGGCGCCTTGGGAGGCGGGG	GGGGTGGGGCGCCTTGGGAGGCGGGG	0	0
GUCA1A	chr6	42143035	42143059	rs1168294932	42143045	A	G	0	GGGGGTGGGGGAGGGCAACCCTGGG	GGGGGTGGGGGGGGGCAACCCTGGG	0	0
ATP8A2	chr13	26353523	26353552	rs1168381061	26353525	A	G	0	GGGAGTGGGGTTGGGGTGGGTGGGGCAGGG	GGGGGTGGGGTTGGGGTGGGTGGGGCAGGG	0	0
FIP1L1	chr4	54338505	54338526	rs1168427021	54338516	T	G	0	GGGGTTGGGGGATGGGGGAGGG	GGGGTTGGGGGAGGGGGGAGGG	0	0
TBXAS1	chr7	139477835	139477864	rs1168437520	139477852	G	C	0	GGGGGGCGGCGGGCGGGGGCGGGGGCGGGG	GGGGGGCGGCGGGCGGGGCCGGGGGCGGGG	0	0
OSMR	chr5	38863291	38863319	rs1168521836	38863313	A	G	0	GGGAGAGGGGGAGGGGGAGGGGGAGGGGG	GGGAGAGGGGGAGGGGGAGGGGGGGGGGG	0	0
RARA	chr17	38473843	38473861	rs1168669716	38473848	T	G	0	GGGGGCTGGGAGGGTTGGG	GGGGGCGGGGAGGGTTGGG	0	0
HSD11B2	chr16	67467812	67467836	rs1168702955	67467817	T	G	0	GGGGGTTGGGGGGCGGGGTTGAGGG	GGGGGTGGGGGGGCGGGGTTGAGGG	0	0
DOK7	chr4	3490668	3490690	rs1168706544	3490675	G	T	0	GGGCGGGGGCTTGGGGACCAGGG	GGGCGGGGTCTTGGGGACCAGGG	1	1
ACADVL	chr17	7120959	7120975	rs1168710406	7120973	G	A	0	GGGGGAGGGAGGGAGGG	GGGGGAGGGAGGGAGAG	0	0
RAD50	chr5	131920642	131920663	rs1168759532	131920656	A	G	0	GGGGTGGGGGGAGGGAGGAGGG	GGGGTGGGGGGAGGGGGGAGGG	0	0
LRP5	chr11	68131483	68131513	rs1168795695	68131497	C	T	0	GGGAGGATGCGGGGGCGTGGGGGTGCGCGGG	GGGAGGATGCGGGGGTGTGGGGGTGCGCGGG	0	0
JPH3	chr16	87635890	87635917	rs1168831904	87635910	G	A	0	GGGGGCCCCGGGGAAGCCCAGGGCGGGG	GGGGGCCCCGGGGAAGCCCAGAGCGGGG	0	0
EVC	chr4	5763223	5763251	rs1168837522	5763227	G	A	0	GGGGGGCGGGGGGTGGTTGGGGGGTGGGG	GGGGGACGGGGGGTGGTTGGGGGGTGGGG	0	0
COL18A1	chr21	46927283	46927306	rs1168901104	46927291	G	A	0	GGGAGGGCCGGGTGCTGGGCAGGG	GGGAGGGCCAGGTGCTGGGCAGGG	0	0
PHKB	chr16	47663936	47663957	rs1168906284	47663946	A	G	0	GGGGTCGGGGGAGGAGGGGGGG	GGGGTCGGGGGGGGAGGGGGGG	0	0
TBXAS1	chr7	139477648	139477674	rs1168941130	139477655	C	G	0	GGGGGGCTCGGGGCTCGGGGCTCGGGG	GGGGGGCTGGGGGCTCGGGGCTCGGGG	0	0
HSPB1	chr7	75932436	75932454	rs1169033849	75932444	G	A	0	GGGCGGGCAGGGCCGGGGG	GGGCGGGCAAGGCCGGGGG	0	0
LAMA3	chr18	21445613	21445635	rs1169044724	21445628	G	A	0	GGGGTCTGGGTAGGGGGAATGGG	GGGGTCTGGGTAGGGGAAATGGG	0	0
EPB41	chr1	29224084	29224111	rs1169120852	29224094	C	T	0	GGGAAGGGAAGCGGAGGGAAGGGAAGGG	GGGAAGGGAAGTGGAGGGAAGGGAAGGG	0	0
CFD	chr19	862464	862486	rs1169163446	862484	G	A	0	GGGTGGGAGGTATAGGGGGCGGG	GGGTGGGAGGTATAGGGGGCGAG	0	0
PACRG	chr6	163321014	163321046	rs116920181	163321034	G	C	0	GGGAAGGTCAGGGAGCTGCAGGGAGCAAAAGGG	GGGAAGGTCAGGGAGCTGCAGCGAGCAAAAGGG	0	0
CA4	chr17	58238138	58238163	rs1169219892	58238147	G	A	0	GGGCAGGGAAGGTGGGAAGCCCTGGG	GGGCAGGGAAAGTGGGAAGCCCTGGG	0	0
COL18A1	chr21	46906714	46906745	rs1169268745	46906721	A	G	0	GGGGTTGCAGGGCCAGCGGGGGCTGGGCTGGG	GGGGTTGCGGGGCCAGCGGGGGCTGGGCTGGG	0	0
DYSF	chr2	71771019	71771046	rs1169283077	71771034	G	A	0	GGGAGAGGGAGACCGTGGGGAGAGGGGG	GGGAGAGGGAGACCGTAGGGAGAGGGGG	1	1
CNTNAP2	chr7	146048122	146048143	rs1169328093	146048132	A	G	0	GGGGTGGGGGGAGGGTGGAGGG	GGGGTGGGGGGGGGGTGGAGGG	0	0
PHKB	chr16	47627134	47627156	rs1169332806	47627151	G	A	0	GGGAAGGAGGGAGGGAGGGAGGG	GGGAAGGAGGGAGGGAGGAAGGG	0	0
GUCY2D	chr17	7919172	7919198	rs1169346497	7919183	G	A	0	GGGACAAGACGGGGAGGTGGGAGGGGG	GGGACAAGACGGAGAGGTGGGAGGGGG	1	1
LAMA2	chr6	129767677	129767709	rs1169354999	129767681	G	C	0	GGGGAGGCGAGGGGAGGGGAGGGGAGGGGAGGG	GGGGACGCGAGGGGAGGGGAGGGGAGGGGAGGG	0	0
FOXG1	chr14	29235838	29235859	rs1169386303	29235842	G	A	0	GGGCGGGGCGGGGGTGGGTGGG	GGGCGAGGCGGGGGTGGGTGGG	0	0
SMAD6	chr15	67065548	67065571	rs1169433505	67065554	G	A	0	GGGGGGTGGGGAGGGGTGGGTGGG	GGGGGGTAGGGAGGGGTGGGTGGG	0	0
TEAD1	chr11	12841563	12841587	rs1169532972	12841579	T	G	0	GGGCCTGGGGCAGGGAGTTGTGGGG	GGGCCTGGGGCAGGGAGGTGTGGGG	0	0
NAT8L	chr4	2067817	2067845	rs1169549415	2067830	C	T	0	GGGCTCCTGGGGTGCAGGGTGCTTGGGGG	GGGCTCCTGGGGTGTAGGGTGCTTGGGGG	0	0
CPS1	chr2	211484647	211484676	rs1169569685	211484653	G	A	0	GGGGCCTGTTGGGGGGTGGGGGGCTAAGGG	GGGGCCTATTGGGGGGTGGGGGGCTAAGGG	0	0
PAX7	chr1	18978674	18978694	rs1169577491	18978676	T	G	0	GGGTGGGAGGGGAAGGGTGGG	GGGGGGGAGGGGAAGGGTGGG	0	0
DPP6	chr7	153702779	153702807	rs1169625611	153702802	G	A	0	GGGGGCTGGGGGGCTGTGGGGGCTGGGGG	GGGGGCTGGGGGGCTGTGGGGGCTAGGGG	0	0
CAMTA1	chr1	6983724	6983754	rs1169656178	6983738	A	G	0	GGGGGTGTTGGGGTCAGCCTGGGAAGCGGGG	GGGGGTGTTGGGGTCGGCCTGGGAAGCGGGG	0	0
PACRG	chr6	163281084	163281111	rs1169670820	163281099	T	G	0	GGGTTTAGCAGGGAGGTGGGGGTGGGGG	GGGTTTAGCAGGGAGGGGGGGGTGGGGG	0	0
DPP6	chr7	154594053	154594077	rs1169678437	154594061	C	T	0	GGGTGGGGGCTGCGGGACCCCTGGG	GGGTGGGGGTTGCGGGACCCCTGGG	1	1
RET	chr10	43606930	43606955	rs1169686751	43606933	G	A	0	GGGAGGGAGGGTCGGGGTCCTGGGGG	GGGAAGGAGGGTCGGGGTCCTGGGGG	0	0
SLC25A4	chr4	186064663	186064690	rs1169726406	186064683	G	A	0	GGGCGCGGGCGCGGCGGGCCGGGCGGGG	GGGCGCGGGCGCGGCGGGCCGAGCGGGG	0	0
TBX1	chr22	19748198	19748227	rs1169756000	19748223	G	A	0	GGGGGTGGGGGGGCCCCGGGCGGGGCGGGG	GGGGGTGGGGGGGCCCCGGGCGGGGCAGGG	0	0
CD2AP	chr6	47474539	47474559	rs1169790715	47474550	G	C	0	GGGAGAGGGAGAGGGAGAGGG	GGGAGAGGGAGACGGAGAGGG	0	0
MEF2A	chr15	100106519	100106545	rs1169804096	100106526	T	G	0	GGGGCGGGTAGGGTGCTGGGAGGCGGG	GGGGCGGGGAGGGTGCTGGGAGGCGGG	0	0
CHRM3	chr1	239744756	239744770	rs1169882713	239744769	G	A	0	GGGTGGGTGGGGGGG	GGGTGGGTGGGGGGA	0	0
SEPT9	chr17	75277376	75277401	rs1169890579	75277394	T	G	0	GGGGCGGGGAGGGGGCGGGTCAGGGG	GGGGCGGGGAGGGGGCGGGGCAGGGG	0	0
NTRK1	chr1	156845464	156845488	rs1169917827	156845481	G	T	0	GGGCTATGCTGGGTCAAGGGCAGGG	GGGCTATGCTGGGTCAAGTGCAGGG	0	0
CHAT	chr10	50830078	50830092	rs116992678	50830087	G	A	0	GGGAGGGAGGGAGGG	GGGAGGGAGGAAGGG	0	0
FKRP	chr19	47261040	47261062	rs1169937746	47261051	G	A	0	GGGTGCTGGGCCGGGCGCGGGGG	GGGTGCTGGGCCAGGCGCGGGGG	0	0
PRPF31	chr19	54619198	54619223	rs1169946458	54619209	G	T	0	GGGGAGCGGGAGGCTGGGCTCCTGGG	GGGGAGCGGGAGTCTGGGCTCCTGGG	0	0
BEAN1	chr16	66508523	66508549	rs1169958215	66508536	G	A	0	GGGAGGGAGGGAGGGAGGGAGGGAGGG	GGGAGGGAGGGAGGAAGGGAGGGAGGG	0	0
ARHGAP31	chr3	119044490	119044521	rs1169994560	119044511	G	C	0	GGGGATGGCGGGGGTTGGGGGGGAAGGGGGGG	GGGGATGGCGGGGGTTGGGGGGCAAGGGGGGG	0	0
BEAN1	chr16	66508523	66508549	rs1170004638	66508546	G	A	0	GGGAGGGAGGGAGGGAGGGAGGGAGGG	GGGAGGGAGGGAGGGAGGGAGGGAAGG	0	0
DPP6	chr7	154585919	154585946	rs1170020816	154585927	G	A	0	GGGGCTGTGGGGGTGGAGGGGAGACGGG	GGGGCTGTGAGGGTGGAGGGGAGACGGG	0	0
KCNQ4	chr1	41257702	41257728	rs1170038233	41257715	G	A	0	GGGGTGTGGGTCGGGGGTGGGGTAGGG	GGGGTGTGGGTCGGAGGTGGGGTAGGG	0	0
GAD1	chr2	171697121	171697147	rs1170041412	171697136	G	A	0	GGGAGGGAGGGAGGAAGGGAGGAAGGG	GGGAGGGAGGGAGGAAAGGAGGAAGGG	0	0
TFAP2B	chr6	50787555	50787584	rs1170072556	50787578	G	A	0	GGGCGAGGTGGGAGAGGCGGGCGAGGTGGG	GGGCGAGGTGGGAGAGGCGGGCGAAGTGGG	0	0
TCOF1	chr5	149770215	149770241	rs1170074281	149770225	A	G	0	GGGGTGGGCTAAGGGGGTGTTGGGGGG	GGGGTGGGCTAGGGGGGTGTTGGGGGG	0	0
FANCD2	chr3	10103655	10103675	rs1170099944	10103671	A	G	0	GGGGTGGGGGAGGGGGGAGGG	GGGGTGGGGGAGGGGGGGGGG	0	0
LRP5	chr11	68133181	68133212	rs1170115325	68133188	A	G	0	GGGACGGGACGGGGCGGGCGGGCGGGGCGGGG	GGGACGGGGCGGGGCGGGCGGGCGGGGCGGGG	0	0
CASR	chr3	121903423	121903451	rs1170144488	121903425	G	A	0	GGGGGAGGGGCCGTGGCGGGGTCTGGGGG	GGGAGAGGGGCCGTGGCGGGGTCTGGGGG	0	0
CTNS	chr17	3560372	3560398	rs1170191820	3560397	G	A	0	GGGAGGAGGGAGGAGGGCACAGAAGGG	GGGAGGAGGGAGGAGGGCACAGAAGGA	0	0
ACTN4	chr19	39138591	39138611	rs1170229403	39138602	A	G	0	GGGGGCCCGGGGAGGGGTGGG	GGGGGCCCGGGGGGGGGTGGG	0	0
EIF2B5	chr3	184280268	184280289	rs1170243315	184280287	G	A	0	GGGGCCCAGGGATGGGGTGGGG	GGGGCCCAGGGATGGGGTGGAG	0	0
MXI1	chr10	111986717	111986742	rs1170253890	111986725	C	A	0	GGGGAGGGGCGCGCGGGTGTGAGGGG	GGGGAGGGGAGCGCGGGTGTGAGGGG	0	0
C10orf11	chr10	78286590	78286611	rs1170261079	78286609	G	A	0	GGGGTGGGGGGAGGGGGGAGGG	GGGGTGGGGGGAGGGGGGAGAG	0	0
GRN	chr17	42427741	42427771	rs1170393657	42427746	T	G	0	GGGAAGTGGGGGCAGAGTTGGGGGCCAGGGG	GGGAAGGGGGGGCAGAGTTGGGGGCCAGGGG	0	0
IFNAR2	chr21	34620682	34620703	rs1170429023	34620696	G	C	0	GGGGGGAGGGAGGGAGGGGGGG	GGGGGGAGGGAGGGACGGGGGG	0	0
WDR19	chr4	39253979	39254000	rs1170436834	39253982	T	G	0	GGGGTGGGGGGAGGGGGGAGGG	GGGGGGGGGGGAGGGGGGAGGG	0	0
RAD51B	chr14	68582113	68582134	rs1170449371	68582123	A	T	0	GGGGTGGGGGGAGGGGGGAGGG	GGGGTGGGGGGTGGGGGGAGGG	0	0
RAI1	chr17	17589789	17589809	rs1170451920	17589805	T	G	0	GGGAAGGGGAGGCAGGGTGGG	GGGAAGGGGAGGCAGGGGGGG	0	0
FIP1L1	chr4	54767735	54767761	rs1170477950	54767751	G	A	0	GGGAGGGAGGGAGGGAGGGAGGGAGGG	GGGAGGGAGGGAGGGAGAGAGGGAGGG	0	0
CCM2	chr7	45040001	45040029	rs1170562631	45040018	G	T	0	GGGCGGCTGGGTTGAGGGGCCAGGGTGGG	GGGCGGCTGGGTTGAGGGTCCAGGGTGGG	0	0
CNTNAP2	chr7	146722528	146722555	rs1170563305	146722529	G	A	0	GGGGAGGGGAGGGGAGGAGGGGGAGGGG	GGAGAGGGGAGGGGAGGAGGGGGAGGGG	0	0
HOXD4	chr2	177017183	177017200	rs1170590016	177017191	G	C	0	GGGGAGAGGGCGGGAGGG	GGGGAGAGGCCGGGAGGG	0	0
CC2D1A	chr19	14040619	14040640	rs1170620375	14040620	G	A	0	GGGGGAGGGGCTCGGGGATGGG	GGAGGAGGGGCTCGGGGATGGG	0	0
CEP164	chr11	117266943	117266972	rs1170659591	117266960	G	A	0	GGGGCATTGGGAGGGGCTGGGCATCAGGGG	GGGGCATTGGGAGGGGCTAGGCATCAGGGG	0	0
FAM20C	chr7	216444	216464	rs1170667010	216456	G	T	0	GGGGCTGGGTGGGGAGCAGGG	GGGGCTGGGTGGGTAGCAGGG	0	0
CNTNAP2	chr7	147833111	147833137	rs1170684236	147833128	G	A	0	GGGAGGGAGGGAGGGAGGGAGGGAGGG	GGGAGGGAGGGAGGGAGGAAGGGAGGG	0	0
EIF2B5	chr3	184312706	184312731	rs1170708740	184312721	G	C	0	GGGCTCAGGGTGAGTGGGGGTAGGGG	GGGCTCAGGGTGAGTGCGGGTAGGGG	0	0
PAX7	chr1	18978674	18978694	rs1170764395	18978680	A	G	0	GGGTGGGAGGGGAAGGGTGGG	GGGTGGGGGGGGAAGGGTGGG	0	0
CAPN5	chr11	76810744	76810769	rs1170795064	76810750	C	T	0	GGGAGACCGTGGGGAGAGGGAGAGGG	GGGAGACTGTGGGGAGAGGGAGAGGG	1	1
NDUFS7	chr19	1387906	1387932	rs1170821521	1387911	G	T	0	GGGGCGGGGGGGGTGGGGGGTGGGGGG	GGGGCGTGGGGGGTGGGGGGTGGGGGG	0	0
HTT	chr4	3209657	3209677	rs1170831994	3209665	T	G	0	GGGGCGGGGTGGGGGGCAGGG	GGGGCGGGGGGGGGGGCAGGG	0	0
WBSCR22	chr7	73098417	73098439	rs1170852332	73098419	C	A	0	GGGCGGTGGGTACGGGCGAGGGG	GGGAGGTGGGTACGGGCGAGGGG	0	0
CDKAL1	chr6	21186301	21186319	rs1170859163	21186303	G	A	0	GGGGGTGGGGCAGGGGGGG	GGGAGTGGGGCAGGGGGGG	0	0
KLF11	chr2	10184063	10184095	rs1170880866	10184078	G	C	0	GGGCGCGCCCGGGTCGGCGGGGGCGAGGAGGGG	GGGCGCGCCCGGGTCGCCGGGGGCGAGGAGGGG	0	0
DYSF	chr2	71838488	71838509	rs1170948950	71838495	G	A	0	GGGCCTGGGCGTGGGGGCTGGG	GGGCCTGGACGTGGGGGCTGGG	0	0
ANTXR1	chr2	69323452	69323478	rs1170954989	69323459	G	A	0	GGGAGGAAGGGAGGAAGGGAGGAAGGG	GGGAGGAAAGGAGGAAGGGAGGAAGGG	0	0
CRADD	chr12	94236586	94236610	rs1170968525	94236593	G	A	0	GGGCGGGGGTGGGGGAGAGTAGGGG	GGGCGGGGATGGGGGAGAGTAGGGG	0	0
PCNT	chr21	47843718	47843742	rs1171052062	47843728	A	G	0	GGGGGAGTGGGAGGGGAGGAGGGGG	GGGGGAGTGGGGGGGGAGGAGGGGG	0	0
EXT2	chr11	44118141	44118166	rs1171052126	44118159	C	T	0	GGGGTGTGTCGGGCCGGGGCCAGGGG	GGGGTGTGTCGGGCCGGGGTCAGGGG	0	0
CFD	chr19	862136	862163	rs1171080302	862149	T	G	0	GGGGGCGGGGCATGTGGGTAGGGTGGGG	GGGGGCGGGGCATGGGGGTAGGGTGGGG	0	0
ADCK3	chr1	227164022	227164048	rs1171086292	227164043	C	T	0	GGGCTGCGGGGCTGCGGGACTGCGGGG	GGGCTGCGGGGCTGCGGGACTGTGGGG	1	1
RNF213	chr17	78329298	78329327	rs1171123184	78329311	T	G	0	GGGGTGACCGGGAATGGGGGCTTACAGGGG	GGGGTGACCGGGAAGGGGGGCTTACAGGGG	1	1
CCM2	chr7	45040047	45040071	rs1171128965	45040056	G	C	0	GGGGCCCGGGGGGGGGGGCAGTGGG	GGGGCCCGGGCGGGGGGGCAGTGGG	0	0
DPP10	chr2	115514715	115514735	rs1171141359	115514721	A	G	0	GGGAGAGAGGGGTGGGGAGGG	GGGAGAGGGGGGTGGGGAGGG	0	0
AKR1D1	chr7	137706942	137706968	rs1171236079	137706949	G	A	0	GGGGGTGGGGGTGGGGCCGGGGCGGGG	GGGGGTGGAGGTGGGGCCGGGGCGGGG	0	0
DOK7	chr4	3485053	3485077	rs1171333550	3485061	T	G	0	GGGGGGGGCTGGGTGGGAGCGGGGG	GGGGGGGGCGGGGTGGGAGCGGGGG	0	0
PADI4	chr1	17687175	17687205	rs1171366223	17687176	G	A	0	GGGGCTCCGGGGTGATGCAGGGGATGGAGGG	GGAGCTCCGGGGTGATGCAGGGGATGGAGGG	0	0
ESPN	chr1	6497985	6498015	rs1171440534	6498001	T	G	0	GGGAACAAGAGGGTGGGTGGGCAAAGGGGGG	GGGAACAAGAGGGTGGGGGGGCAAAGGGGGG	1	1
SMOC1	chr14	70391634	70391664	rs1171532586	70391656	G	A	0	GGGGAAGTAGGGGAGGTAAGGGAGGTAGGGG	GGGGAAGTAGGGGAGGTAAGGGAAGTAGGGG	0	0
ST14	chr11	130067415	130067432	rs1171555922	130067417	C	T	0	GGGCAGGGCAGGGCAGGG	GGGTAGGGCAGGGCAGGG	0	0
PALLD	chr4	169654747	169654764	rs1171565937	169654760	T	G	0	GGGGCGGGGGTGGGTGGG	GGGGCGGGGGTGGGGGGG	0	0
RB1	chr13	49045547	49045568	rs1171656050	49045565	G	A	0	GGGGTCGGGGGAGGGGGGAGGG	GGGGTCGGGGGAGGGGGGAAGG	0	0
EIF2B5	chr3	184104331	184104358	rs1171735237	184104357	G	A	0	GGGGCCGAGGGGGTGCGGGCGCTGGGGG	GGGGCCGAGGGGGTGCGGGCGCTGGGGA	0	0
EXT2	chr11	44117979	44118007	rs1171802754	44118001	G	T	0	GGGGACTGGGTGGCCGGGGTCATGTTGGG	GGGGACTGGGTGGCCGGGGTCATTTTGGG	1	1
CACNA1H	chr16	1203298	1203324	rs1171866139	1203312	T	G	0	GGGAGCCGGGCGGGCTGGGGACGCGGG	GGGAGCCGGGCGGGCGGGGGACGCGGG	0	0
KCTD7	chr7	66094227	66094252	rs1171876685	66094230	A	G	0	GGGGAGGGGCGCGGGGGAGAAGCGGG	GGGGGGGGGCGCGGGGGAGAAGCGGG	0	0
CACNA1C	chr12	2162087	2162110	rs1172077059	2162104	G	C	0	GGGGCGGGCGCGGGCGCGGCGGGG	GGGGCGGGCGCGGGCGCGCCGGGG	0	0
FIP1L1	chr4	54768015	54768043	rs1172159781	54768016	G	A	0	GGGAGGGAGGGACAAAGGGAAGGGAAGGG	GGAAGGGAGGGACAAAGGGAAGGGAAGGG	1	1
TIMP3	chr22	33221128	33221151	rs1172206806	33221135	T	C	0	GGGAGGACTTGGGGGAGGGATGGG	GGGAGGACCTGGGGGAGGGATGGG	1	1
OSMR	chr5	38863291	38863319	rs1172231269	38863292	G	A	0	GGGAGAGGGGGAGGGGGAGGGGGAGGGGG	GGAAGAGGGGGAGGGGGAGGGGGAGGGGG	0	0
TET2	chr4	106068994	106069018	rs1172265936	106068997	A	G	0	GGGGAGGGGGCGGGAGGGGGTGGGG	GGGGGGGGGGCGGGAGGGGGTGGGG	0	0
EIF2B5	chr3	184098608	184098634	rs1172323325	184098621	G	T	0	GGGCCCTGGCGGGTGGGGAGCGCCGGG	GGGCCCTGGCGGGTTGGGAGCGCCGGG	0	0
RNF213	chr17	78283140	78283167	rs1172347906	78283159	G	T	0	GGGTGTGGGGGGTGTCAGTGGGCCAGGG	GGGTGTGGGGGGTGTCAGTGTGCCAGGG	0	0
EHBP1	chr2	63068476	63068497	rs1172355924	63068490	G	A	0	GGGGTGGGGGGAGGGGGGAGGG	GGGGTGGGGGGAGGGAGGAGGG	0	0
EPB41L1	chr20	34707576	34707604	rs1172365467	34707593	G	A	0	GGGGAGGGGAGAGGAGGGGAAGGGAGGGG	GGGGAGGGGAGAGGAGGGAAAGGGAGGGG	0	0
SETBP1	chr18	42482446	42482462	rs1172443866	42482458	T	G	0	GGGGTGGGTGGGCTGGG	GGGGTGGGTGGGCGGGG	0	0
CTNS	chr17	3549244	3549275	rs1172487646	3549259	A	G	0	GGGTCTGGGTGGGGGGAACTGGGCCTGGGGGG	GGGTCTGGGTGGGGGGGACTGGGCCTGGGGGG	1	1
MEIS1	chr2	66668256	66668277	rs1172555078	66668271	A	G	0	GGGGTGGGGTGGGGCCAGTGGG	GGGGTGGGGTGGGGCCGGTGGG	0	0
RAB7A	chr3	128498428	128498444	rs1172572618	128498431	T	G	0	GGGGTGGGGTGGGGGGG	GGGGGGGGGTGGGGGGG	0	0
LARP7	chr4	113565431	113565453	rs1172576329	113565452	G	T	0	GGGGTGGGGCGGGGGCGGGGGGG	GGGGTGGGGCGGGGGCGGGGGGT	0	0
ST3GAL3	chr1	44337325	44337355	rs1172697675	44337341	A	G	0	GGGATGTGAGGGAGAAGATGGGGTGTGAGGG	GGGATGTGAGGGAGAAGGTGGGGTGTGAGGG	0	0
F7	chr13	113760807	113760832	rs117275079	113760823	G	A	0	GGGCGTGTGGGGTGCAGGGGATGGGG	GGGCGTGTGGGGTGCAGAGGATGGGG	0	0
PRCD	chr17	74540436	74540459	rs1172797899	74540446	G	A	0	GGGAAGGAAGGGAAAGGGTGAGGG	GGGAAGGAAGGAAAAGGGTGAGGG	0	0
SLC11A1	chr2	219256009	219256034	rs1172858799	219256013	A	G	0	GGGTGAGCGCGGGTGGGTGGGGAGGG	GGGTGGGCGCGGGTGGGTGGGGAGGG	0	0
EGFR	chr7	55288950	55288970	rs1172945149	55288954	A	C	0	GGGAGAGGGAGAGGGAGAGGG	GGGAGCGGGAGAGGGAGAGGG	0	0
FASLG	chr1	172631773	172631792	rs1172995072	172631788	C	G	0	GGGGTGGGGCTGGGGGCGGG	GGGGTGGGGCTGGGGGGGGG	0	0
DPP6	chr7	153834727	153834756	rs1173023713	153834740	G	C	0	GGGGGGGGTGGGGGGGTGGGGGGGGTGGGG	GGGGGGGGTGGGGGCGTGGGGGGGGTGGGG	0	0
FLNC	chr7	128473917	128473947	rs1173040471	128473927	T	G	0	GGGGAAGGGGGTGGGCTGGGGAGCTGCTGGG	GGGGAAGGGGGGGGGCTGGGGAGCTGCTGGG	0	0
AIRE	chr21	45716689	45716716	rs1173074309	45716708	T	G	0	GGGAGGGTGGGGCGTGGGAGTGGGGGGG	GGGAGGGTGGGGCGTGGGAGGGGGGGGG	0	0
CBL	chr11	119077489	119077518	rs1173124548	119077492	G	C	0	GGGAGGGTGGGGGGCGGCGTGGGGGAGGGG	GGGACGGTGGGGGGCGGCGTGGGGGAGGGG	0	0
KCTD7	chr7	66100920	66100943	rs1173252839	66100935	G	T	0	GGGATTTTGGGGAGGGGTTCTGGG	GGGATTTTGGGGAGGGTTTCTGGG	0	0
LMNA	chr1	156071429	156071455	rs1173289911	156071444	G	T	0	GGGAGGGAGGGAGGGAGGGAGGGAGGG	GGGAGGGAGGGAGGGATGGAGGGAGGG	0	0
CAMTA1	chr1	7507479	7507503	rs1173376177	7507489	G	T	0	GGGGGCGGGGTGGGGGGTGAGGGGG	GGGGGCGGGGTTGGGGGTGAGGGGG	0	0
EPB41	chr1	29224154	29224181	rs1173545041	29224166	G	A	0	GGGGAGAGGAGGGGAGGGGACAGGAGGG	GGGGAGAGGAGGGAAGGGGACAGGAGGG	1	1
F7	chr13	113763542	113763570	rs1173584623	113763557	C	G	0	GGGGGTGTGGGTGTCCCGGGGGTCGTGGG	GGGGGTGTGGGTGTCCGGGGGGTCGTGGG	0	0
CD40	chr20	44757414	44757441	rs1173623149	44757437	A	G	0	GGGAAAGGGGGGAGGGCTTGGGGAAGGG	GGGAAAGGGGGGAGGGCTTGGGGAGGGG	0	0
CAMTA1	chr1	7740870	7740891	rs1173637437	7740878	C	A	0	GGGGGGGGGCGTGGGTCCGGGG	GGGGGGGGGAGTGGGTCCGGGG	0	0
KAT6B	chr10	76585671	76585696	rs1173646120	76585684	C	G	0	GGGACGGGACGGGACGGGAGAGAGGG	GGGACGGGACGGGAGGGGAGAGAGGG	0	0
MCCC2	chr5	70943761	70943786	rs1173655564	70943777	T	G	0	GGGATGGTGGGTCGGGTTGGGTGGGG	GGGATGGTGGGTCGGGTGGGGTGGGG	0	0
ST14	chr11	130069597	130069622	rs1173663301	130069598	G	A	0	GGGAGGGGGAGGTGGGAAGATGAGGG	GGAAGGGGGAGGTGGGAAGATGAGGG	0	0
SLC22A12	chr11	64367403	64367421	rs1173691555	64367409	T	C	0	GGGGGGGTCTCGGGCTGGG	GGGGGGGCCTCGGGCTGGG	0	0
ST3GAL3	chr1	44337400	44337428	rs1173839616	44337403	T	C	0	GGGATGTGGGAAAGGATGGGGTGGGAGGG	GGGACGTGGGAAAGGATGGGGTGGGAGGG	0	0
EYA4	chr6	133843104	133843125	rs1173850079	133843109	G	C	0	GGGGTGGGGGGAGGGGGGAGGG	GGGGTGCGGGGAGGGGGGAGGG	0	0
C2	chr6	31896713	31896743	rs1173871404	31896741	G	A	0	GGGCTACACAGGGGGCTGGGGTCTCCTGGGG	GGGCTACACAGGGGGCTGGGGTCTCCTGGAG	0	0
FIP1L1	chr4	54628686	54628707	rs1173875783	54628696	A	G	0	GGGGTGGGGGGAGGGGGGAGGG	GGGGTGGGGGGGGGGGGGAGGG	0	0
CLN8	chr8	1712190	1712215	rs1173888898	1712197	G	T	0	GGGGGCTGGGAAGCCCGGGTGAGGGG	GGGGGCTGTGAAGCCCGGGTGAGGGG	0	0
AGRN	chr1	984442	984466	rs1173918368	984465	G	A	0	GGGCGGGGAGGGGACGGGGCCGGGG	GGGCGGGGAGGGGACGGGGCCGGGA	0	0
COX10	chr17	14078391	14078414	rs1173943590	14078413	G	T	0	GGGAAATAGCGGGGGGGGGGGGGG	GGGAAATAGCGGGGGGGGGGGGGT	0	0
SCNN1B	chr16	23354855	23354869	rs1173947661	23354862	G	A	0	GGGAGGGAGGGAGGG	GGGAGGGAAGGAGGG	0	0
NOL3	chr16	67208378	67208403	rs1174072572	67208401	G	A	0	GGGGCGGGGCCTAGGGCAGAGCAGGG	GGGGCGGGGCCTAGGGCAGAGCAGAG	0	0
FGD4	chr12	32716977	32716998	rs1174090345	32716979	A	G	0	GGGAGAGGGAGTGGGAGAGGGG	GGGGGAGGGAGTGGGAGAGGGG	0	0
FAM20C	chr7	216004	216026	rs1174116571	216014	G	A	0	GGGGCTGGGTGGGGGGAGCAGGG	GGGGCTGGGTGAGGGGAGCAGGG	0	0
RSPH9	chr6	43613113	43613128	rs1174151200	43613120	T	G	0	GGGCGGGGTGGGCGGG	GGGCGGGGGGGGCGGG	0	0
BFSP2	chr3	133144691	133144713	rs1174179645	133144695	A	G	0	GGGAAAGGAAGGGAAGGGAAGGG	GGGAAGGGAAGGGAAGGGAAGGG	0	0
NOS3	chr7	150696770	150696796	rs1174271364	150696791	G	T	0	GGGGGTAGGTGGGTGTGGGTTTGTGGG	GGGGGTAGGTGGGTGTGGGTTTTTGGG	0	0
F7	chr13	113762937	113762965	rs1174272202	113762962	G	A	0	GGGTGTCCCGGGGGCGTGGGTGTCCCGGG	GGGTGTCCCGGGGGCGTGGGTGTCCCAGG	0	0
D2HGDH	chr2	242704713	242704742	rs1174298017	242704739	G	A	0	GGGAGAACTTGGGGAGATGGGAGCCCCGGG	GGGAGAACTTGGGGAGATGGGAGCCCCAGG	1	1
TSC2	chr16	2111639	2111666	rs1174301204	2111649	G	T	0	GGGGTGTCCTGGGCCACGTGGGTCAGGG	GGGGTGTCCTGTGCCACGTGGGTCAGGG	0	0
FIP1L1	chr4	54769536	54769560	rs1174406449	54769557	G	A	0	GGGAGGGAAGGAGGGGGGGGAAGGG	GGGAGGGAAGGAGGGGGGGGAAAGG	0	0
SGCD	chr5	155724649	155724670	rs1174495452	155724659	A	G	0	GGGGTGGGGGGAGGGGGGCGGG	GGGGTGGGGGGGGGGGGGCGGG	0	0
CDH3	chr16	68744875	68744907	rs1174527301	68744880	A	G	0	GGGGGGAGGGGGGAGGGGACGGGAGGAAAGGGG	GGGGGGGGGGGGGAGGGGACGGGAGGAAAGGGG	0	0
PLCG2	chr16	81943604	81943630	rs1174565142	81943626	G	T	0	GGGGGATGGGGTGGGGTGGGGTGGGGG	GGGGGATGGGGTGGGGTGGGGTGTGGG	0	0
EHBP1	chr2	62972524	62972541	rs1174571360	62972536	T	G	0	GGGTGGGAGGGGATGGGG	GGGTGGGAGGGGAGGGGG	0	0
KCNQ1	chr11	2524770	2524792	rs1174625238	2524773	T	C	0	GGGGTTGGGGGGAGGGGGGAGGG	GGGGCTGGGGGGAGGGGGGAGGG	0	0
POLD1	chr19	50894945	50894972	rs1174641807	50894958	G	A	0	GGGGGGAGGGGGAGGGGGAGGGAGAGGG	GGGGGGAGGGGGAGAGGGAGGGAGAGGG	0	0
TBX1	chr22	19748116	19748141	rs1174703482	19748139	G	A	0	GGGCGGGCTGGGGGCCGGGGAGGGGG	GGGCGGGCTGGGGGCCGGGGAGGGAG	0	0
POU6F2	chr7	39531721	39531739	rs1174762604	39531736	G	C	0	GGGTTGAGGGTTGGGAGGG	GGGTTGAGGGTTGGGACGG	0	0
SLC11A1	chr2	219256009	219256034	rs1174807494	219256030	A	G	0	GGGTGAGCGCGGGTGGGTGGGGAGGG	GGGTGAGCGCGGGTGGGTGGGGGGGG	0	0
FAM20C	chr7	216400	216422	rs1174928787	216418	A	G	0	GGGGCTGGGTGGGGGGGGCAGGG	GGGGCTGGGTGGGGGGGGCGGGG	0	0
PCNT	chr21	47843640	47843662	rs1174983254	47843658	G	A	0	GGGGAGGGGGAGGGGAAGAGGGG	GGGGAGGGGGAGGGGAAGAAGGG	0	0
MEGF10	chr5	126733747	126733775	rs1175076847	126733768	A	C	0	GGGTCTGTCTGGGGGTGGGGGGAAAGGGG	GGGTCTGTCTGGGGGTGGGGGGCAAGGGG	0	0
MOCOS	chr18	33792295	33792322	rs1175081969	33792309	G	A	0	GGGGGAGTGGGTGAGGGGCAGCCACGGG	GGGGGAGTGGGTGAGAGGCAGCCACGGG	0	0
SERPINH1	chr11	75282745	75282772	rs117514071	75282751	A	G	0	GGGTAGTATGGGGTGGAGGGTTTGAGGG	GGGTAGTGTGGGGTGGAGGGTTTGAGGG	0	0
FIP1L1	chr4	54767763	54767791	rs1175144646	54767790	G	A	0	GGGGGAAGGGAAGGGGAGGGGAGAAAGGG	GGGGGAAGGGAAGGGGAGGGGAGAAAGGA	0	0
SORL1	chr11	121387136	121387162	rs1175182202	121387151	T	G	0	GGGAGTCAGGGAGAGCTGGGGCAGGGG	GGGAGTCAGGGAGAGCGGGGGCAGGGG	0	0
LRTOMT	chr11	71809303	71809325	rs1175223777	71809324	G	A	0	GGGTGGGCAGGGGCAGGTGAGGG	GGGTGGGCAGGGGCAGGTGAGGA	0	0
AMPD3	chr11	10467619	10467639	rs1175460969	10467632	G	A	0	GGGGGTGAGGGGTCGGGGGGG	GGGGGTGAGGGGTCAGGGGGG	0	0
CACNB2	chr10	18551242	18551263	rs1175489090	18551244	G	A	0	GGGGTGGGGTGGGAGGGCAGGG	GGGATGGGGTGGGAGGGCAGGG	0	0
DISC1	chr1	232167201	232167220	rs1175492998	232167219	G	C	0	GGGAAGGGAGAAGGGAAGGG	GGGAAGGGAGAAGGGAAGGC	0	0
SEPN1	chr1	26127063	26127086	rs1175512823	26127076	T	G	0	GGGTGGGGGGTGCCTGGGGCCGGG	GGGTGGGGGGTGCCGGGGGCCGGG	0	0
AGRN	chr1	985421	985451	rs1175542844	985422	G	A	0	GGGGGCGTGGGGCTCTCGGGGCAGGGGGGGG	GGAGGCGTGGGGCTCTCGGGGCAGGGGGGGG	0	0
NNT	chr5	43666690	43666708	rs1175587079	43666697	G	A	0	GGGAGGGGGAGGGGGAGGG	GGGAGGGGAAGGGGGAGGG	0	0
SYNE2	chr14	64319915	64319938	rs1175613523	64319927	A	G	0	GGGAGGGAGGGGAAGGGGCGGGGG	GGGAGGGAGGGGAGGGGGCGGGGG	0	0
LTBP4	chr19	41119134	41119157	rs1175613948	41119135	G	T	0	GGGAGTAGGGCCTGGGTTCCAGGG	GGTAGTAGGGCCTGGGTTCCAGGG	0	0
SEPT9	chr17	75388722	75388743	rs1175665017	75388741	G	A	0	GGGGGAGGGGACTGGGAAAGGG	GGGGGAGGGGACTGGGAAAGAG	1	1
ADCK3	chr1	227164022	227164048	rs1175677768	227164037	G	A	0	GGGCTGCGGGGCTGCGGGACTGCGGGG	GGGCTGCGGGGCTGCGAGACTGCGGGG	1	1
NDUFAF2	chr5	60425470	60425491	rs1175701686	60425474	A	G	0	GGGGTAGGGGGAGGGGGGAGGG	GGGGTGGGGGGAGGGGGGAGGG	0	0
ST3GAL3	chr1	44337701	44337727	rs1175727409	44337706	G	A	0	GGGGGTGAGGGTAGGAGGGGACATGGG	GGGGGTAAGGGTAGGAGGGGACATGGG	1	1
KCNJ2	chr17	68174787	68174806	rs1175749702	68174797	T	G	0	GGGGGTGGGTATGGGGGGGG	GGGGGTGGGTAGGGGGGGGG	0	0
CASP8	chr2	202149405	202149427	rs1175768495	202149409	A	T	0	GGGAGAGGGAGACGGGGAGAGGG	GGGAGTGGGAGACGGGGAGAGGG	0	0
HGSNAT	chr8	43036228	43036248	rs1175791181	43036245	G	C	0	GGGAGAGGGAGAGGGAGAGGG	GGGAGAGGGAGAGGGAGACGG	0	0
SMOC2	chr6	168936552	168936578	rs1175793036	168936560	C	T	0	GGGCGCCGCCGGGGGAAGATGGGAGGG	GGGCGCCGCTGGGGGAAGATGGGAGGG	0	0
CRADD	chr12	94278294	94278317	rs1175810040	94278303	G	A	0	GGGAGGACGGGGTGGGGCCTCGGG	GGGAGGACGGAGTGGGGCCTCGGG	0	0
SPECC1L	chr22	24759880	24759907	rs1175830881	24759898	G	A	0	GGGCGGTGGGGGTGGGGGTGGGGGTGGG	GGGCGGTGGGGGTGGGGGTAGGGGTGGG	0	0
FGGY	chr1	59840581	59840605	rs1175867884	59840583	G	A	0	GGGGTGGGGGGAGGGGGGAGGGGGG	GGGATGGGGGGAGGGGGGAGGGGGG	0	0
ALMS1	chr2	73693612	73693636	rs1175882423	73693622	A	G	0	GGGGTGGGGGGAGGGGGGAGGGGGG	GGGGTGGGGGGGGGGGGGAGGGGGG	0	0
PNPLA6	chr19	7618908	7618930	rs1175897873	7618920	T	G	0	GGGGTGAGGGTCATGGGTGGGGG	GGGGTGAGGGTCAGGGGTGGGGG	0	0
[truncated: 48,934 more rows]

## Sheet: 0 --> 1
Gene	Chromosome	Start	End	Variantname	Position	Reference allelle	Variant allelle	MAF value	G4 sequence with referance allele	G4 sequence with variant allele	m6A motif number in G4 sequence with referance allele	m6A motif number in G4 sequence with variant allele
FZD6	chr8	104311165	104311197	rs1002853331	104311171	G	A	0	GGGGAACGGTGGGTTAGACGGGGACGGGAAGGG	GGGGAACAGTGGGTTAGACGGGGACGGGAAGGG	0	1
ACE	chr17	61587962	61587988	rs1006282483	61587963	G	A	0	GGGCTTGGTGGGGTCAGGGCTCTCGGG	GGACTTGGTGGGGTCAGGGCTCTCGGG	0	1
EPAS1	chr2	46542899	46542927	rs1009373405	46542910	G	A	0	GGGGTGCTCTGGGCTCTGAGGGTGGAGGG	GGGGTGCTCTGGACTCTGAGGGTGGAGGG	0	1
EIF2B5	chr3	184209316	184209338	rs1009715245	184209327	G	C	0	GGGGAGAGGGACGCGGGCAGGGG	GGGGAGAGGGACCCGGGCAGGGG	0	1
SERPING1	chr11	57365210	57365230	rs1009797580	57365211	G	A	0	GGGCAGGGGTGGGGAGTAGGG	GGACAGGGGTGGGGAGTAGGG	0	1
LOXL1	chr15	74244079	74244099	rs1010189370	74244087	G	A	0	GGGATCTGGGCTGTGGGAGGG	GGGATCTGGACTGTGGGAGGG	0	1
CLN8	chr8	1712063	1712084	rs1010238951	1712078	G	A	0	GGGAGCCCGGGTGAGGGCCGGG	GGGAGCCCGGGTGAGGACCGGG	0	1
D2HGDH	chr2	242704673	242704699	rs1010248621	242704685	C	A	0	GGGGAGATGGGAGCCCCGGGCTGAGGG	GGGGAGATGGGAGACCCGGGCTGAGGG	0	1
PAX2	chr10	102547508	102547532	rs1010696313	102547522	G	A	0	GGGGTTGGGTGGGGGGCACCCAGGG	GGGGTTGGGTGGGGGACACCCAGGG	0	1
RAD51B	chr14	68495557	68495583	rs1010793528	68495568	G	A	0	GGGAGATGGGGAGCCCTGGGAGATGGG	GGGAGATGGGGAACCCTGGGAGATGGG	0	1
GLIS2	chr16	4371146	4371171	rs1012643274	4371155	G	A	0	GGGGCTGGGGGCCAGGGCTGGGAGGG	GGGGCTGGGGACCAGGGCTGGGAGGG	0	1
DYSF	chr2	71840176	71840201	rs1012838117	71840194	G	C	0	GGGCCCAGGGGGAGGGAGAGAGAGGG	GGGCCCAGGGGGAGGGAGACAGAGGG	0	1
IGF1R	chr15	99193740	99193766	rs1016007973	99193741	G	A	0	GGGCCGGGGGATGGAGGGGTACTAGGG	GGACCGGGGGATGGAGGGGTACTAGGG	0	1
LTBP4	chr19	41119134	41119157	rs1020848404	41119143	C	A	0	GGGAGTAGGGCCTGGGTTCCAGGG	GGGAGTAGGGACTGGGTTCCAGGG	0	1
TNNI2	chr11	1862188	1862209	rs1022153879	1862189	G	A	0	GGGCAGGCGGGGCGGGCCGGGG	GGACAGGCGGGGCGGGCCGGGG	0	1
MUC5B	chr11	1250059	1250088	rs1022224567	1250062	G	A	0	GGGGGCCACTGGGGGTGGGGAGGCCTGGGG	GGGGACCACTGGGGGTGGGGAGGCCTGGGG	0	1
IRF5	chr7	128578890	128578915	rs1022231295	128578907	T	G	0	GGGAGGGGCGGGAGCGGGTACCTGGG	GGGAGGGGCGGGAGCGGGGACCTGGG	0	1
MMP9	chr20	44638745	44638775	rs1023186665	44638756	G	A	0	GGGGCCGTGGGGGCAGCGGGGTGGGGCGGGG	GGGGCCGTGGGGACAGCGGGGTGGGGCGGGG	0	1
SMARCA4	chr19	11170333	11170357	rs1023571441	11170338	C	G	0	GGGCAACACAGGGCTGGGGCTGGGG	GGGCAAGACAGGGCTGGGGCTGGGG	0	1
EPHX1	chr1	226012425	226012446	rs1024112995	226012439	G	A	0	GGGTGGGCTCCTTGGGCTTGGG	GGGTGGGCTCCTTGGACTTGGG	0	1
MUC5B	chr11	1247661	1247683	rs1024422202	1247673	G	T	0	GGGGGATGGGGACGGGTCAGGGG	GGGGGATGGGGACTGGTCAGGGG	0	1
KLHL40	chr3	42730742	42730766	rs1024826749	42730744	G	A	0	GGGGCTCCCAGGGCTGGGGGAGGGG	GGGACTCCCAGGGCTGGGGGAGGGG	0	1
CDH3	chr16	68679721	68679744	rs1025200824	68679737	G	A	0	GGGGTGTTCGGGCCGGGGCAAGGG	GGGGTGTTCGGGCCGGGACAAGGG	0	1
ELANE	chr19	853090	853114	rs1025992427	853107	G	A	0	GGGTGGGGGGAGGCCGGGGCCGGGG	GGGTGGGGGGAGGCCGGGACCGGGG	0	1
EPHX1	chr1	226028059	226028087	rs1027038176	226028066	G	A	0	GGGAGTGGGCAGCTCTGGGGCTGCAGGGG	GGGAGTGGACAGCTCTGGGGCTGCAGGGG	0	1
ITCH	chr20	32989765	32989784	rs1029974957	32989766	G	A	0	GGGCTAGGGATACGGGGGGG	GGACTAGGGATACGGGGGGG	0	1
DYRK1A	chr21	38740405	38740423	rs1029975756	38740417	G	A	0	GGGGCCGGGCCGGGCCGGG	GGGGCCGGGCCGGACCGGG	0	1
IGF1R	chr15	99444467	99444489	rs1031033261	99444473	G	A	0	GGGGAGGGCAAGTGGGCCTTGGG	GGGGAGGACAAGTGGGCCTTGGG	0	1
PLCG2	chr16	81959696	81959723	rs1031720370	81959716	G	A	0	GGGGGAAGTTGGGTACCAAGGGCATGGG	GGGGGAAGTTGGGTACCAAGGACATGGG	0	1
EIF2B5	chr3	184291340	184291364	rs1032922464	184291356	G	A	0	GGGCCAAGGGCACGGGGGCTGTGGG	GGGCCAAGGGCACGGGGACTGTGGG	0	1
DYSF	chr2	71824866	71824897	rs1034688228	71824888	G	A	0	GGGGGTAGCAGGGAGCTGCAGGGGCCTTTGGG	GGGGGTAGCAGGGAGCTGCAGGGACCTTTGGG	0	1
ARFGEF2	chr20	47588048	47588065	rs1036124231	47588055	G	A	0	GGGCAGGGGCAGGGAGGG	GGGCAGGGACAGGGAGGG	0	1
WWOX	chr16	79147654	79147678	rs1038906309	79147659	G	C	0	GGGGAAGAGGGAGGGTTAAGGAGGG	GGGGAACAGGGAGGGTTAAGGAGGG	0	1
TECR	chr19	14675816	14675838	rs1041896023	14675827	G	A	0	GGGTGTGGGGACGGGGTCGGGGG	GGGTGTGGGGACAGGGTCGGGGG	0	1
WWOX	chr16	79124104	79124127	rs1043669968	79124115	G	A	0	GGGTCTGAGTGGGCCAGGGTCGGG	GGGTCTGAGTGGACCAGGGTCGGG	0	1
DIS3L2	chr2	233207498	233207523	rs1045320290	233207515	G	C	0	GGGCTGGGGCCCCTGGGAGCCCAGGG	GGGCTGGGGCCCCTGGGACCCCAGGG	0	1
EXT2	chr11	44243224	44243249	rs1045439225	44243242	G	A	0	GGGCAGGATTGGGCCCAGGGCCAGGG	GGGCAGGATTGGGCCCAGGACCAGGG	0	1
NBEAL2	chr3	47045042	47045065	rs1046281189	47045058	G	A	0	GGGGGCCCAGGGAGTGGGCAGGGG	GGGGGCCCAGGGAGTGGACAGGGG	0	1
POLD1	chr19	50906575	50906607	rs1046883103	50906597	T	A	0	GGGTCTGGGTGGGTGTCTGTGGGTCTGGGTGGG	GGGTCTGGGTGGGTGTCTGTGGGACTGGGTGGG	0	1
IGF1R	chr15	99394475	99394493	rs1048967055	99394481	G	A	0	GGGCAGGGCCGGGGTGGGG	GGGCAGGACCGGGGTGGGG	0	1
MICA	chr6	31380360	31380384	rs1050529539	31380365	T	C	0	GGGGAATTTGGGAAGGGAATGGGGG	GGGGAACTTGGGAAGGGAATGGGGG	0	1
CACNA1C	chr12	2232647	2232671	rs1051894164	2232659	G	C	0	GGGTTCTAGGGAAGAGTAGGGCGGG	GGGTTCTAGGGAACAGTAGGGCGGG	0	1
NAGS	chr17	42084883	42084907	rs1055474084	42084890	T	A	0	GGGCGGGGTCTGGGGGGCAGTCGGG	GGGCGGGGACTGGGGGGCAGTCGGG	0	1
D2HGDH	chr2	242705013	242705042	rs111163250	242705019	G	C	0	GGGAGAAGTTGGGGAGATGGGAGCCCCGGG	GGGAGAACTTGGGGAGATGGGAGCCCCGGG	0	1
CACNA1H	chr16	1215127	1215147	rs113027677	1215129	C	A	0	GGGCCCGGGAGTGGGTGGGGG	GGGACCGGGAGTGGGTGGGGG	0	1
COL18A1	chr21	46927234	46927257	rs1156359545	46927235	G	A	0	GGGCTGGCAGGGCCGGGTGCTGGG	GGACTGGCAGGGCCGGGTGCTGGG	0	1
FAH	chr15	80445030	80445055	rs1156648216	80445047	G	A	0	GGGGCTCGCGGGGTCGGGGCAAGGGG	GGGGCTCGCGGGGTCGGGACAAGGGG	0	1
RYR1	chr19	38993440	38993467	rs1160750312	38993454	G	A	0	GGGGCAGGGGGAGGAGCAGGGGCAGGGG	GGGGCAGGGGGAGGAACAGGGGCAGGGG	0	1
POLD1	chr19	50905798	50905825	rs1165749993	50905814	G	A	0	GGGCTTCCCAGGGCAGGGCTGGGTGGGG	GGGCTTCCCAGGGCAGGACTGGGTGGGG	0	1
RYR1	chr19	38993440	38993467	rs1166126799	38993460	G	A	0	GGGGCAGGGGGAGGAGCAGGGGCAGGGG	GGGGCAGGGGGAGGAGCAGGGACAGGGG	0	1
ROBO2	chr3	77366938	77366964	rs1166855728	77366951	G	A	0	GGGCTGCTAGGGGGGCTGCTGGGGGGG	GGGCTGCTAGGGGGACTGCTGGGGGGG	0	1
AGRN	chr1	979127	979145	rs1167666713	979139	C	A	0	GGGGCCGGGCGGGCCAGGG	GGGGCCGGGCGGGACAGGG	0	1
DIO1	chr1	54372005	54372025	rs1168213493	54372018	G	A	0	GGGGCCCAGGGAGGGCAAGGG	GGGGCCCAGGGAGGACAAGGG	0	1
CACNA1H	chr16	1203376	1203397	rs1168642843	1203391	G	A	0	GGGGGCCGGGGCCGGGGCCGGG	GGGGGCCGGGGCCGGGACCGGG	0	1
MYH14	chr19	50780185	50780207	rs1172667425	50780201	G	A	0	GGGGGGCCACGGGGAGGGCAGGG	GGGGGGCCACGGGGAGGACAGGG	0	1
CEP164	chr11	117186494	117186517	rs1174755690	117186507	C	A	0	GGGCAGGGCTTGGGCCATGGTGGG	GGGCAGGGCTTGGGACATGGTGGG	0	1
SH3BP2	chr4	2794881	2794912	rs1178215467	2794883	T	A	0	GGGTCTCGGCGGGTCTCGGGGGTCTCGCGGGG	GGGACTCGGCGGGTCTCGGGGGTCTCGCGGGG	0	1
ATP2A1	chr16	28894469	28894487	rs1181726466	28894481	G	A	0	GGGAGGGGTGGGGGCCGGG	GGGAGGGGTGGGGACCGGG	0	1
PACRG	chr6	163321014	163321046	rs1182019211	163321027	G	A	0	GGGAAGGTCAGGGAGCTGCAGGGAGCAAAAGGG	GGGAAGGTCAGGGAACTGCAGGGAGCAAAAGGG	0	1
COL9A3	chr20	61456455	61456481	rs1185970033	61456465	G	A	0	GGGAGGGAGGGGCTGGGCTCCGGCGGG	GGGAGGGAGGGACTGGGCTCCGGCGGG	0	1
AP1S1	chr7	100797681	100797709	rs1186603150	100797685	G	A	0	GGGACGGGGCGGGGCTTCGGGCGAGAGGG	GGGACAGGGCGGGGCTTCGGGCGAGAGGG	0	1
IFNGR2	chr21	34775400	34775423	rs1190813451	34775407	T	A	0	GGGGGGGGTCAGGAGGGGTGGGGG	GGGGGGGGACAGGAGGGGTGGGGG	0	1
HGSNAT	chr8	43036252	43036272	rs1191532750	43036255	G	C	0	GGGAGAGGGAGAGGGAGAGGG	GGGACAGGGAGAGGGAGAGGG	0	1
BFSP2	chr3	133144821	133144848	rs1191671447	133144837	G	A	0	GGGGAAGGCAGGGCAGGGCAGGGCAGGG	GGGGAAGGCAGGGCAGGACAGGGCAGGG	0	1
AGRN	chr1	983095	983123	rs1194817614	983099	G	A	0	GGGAGGCAATGGGTGGGGGATGCCTGGGG	GGGAGACAATGGGTGGGGGATGCCTGGGG	0	1
SERPING1	chr11	57365644	57365669	rs1195543686	57365651	G	A	0	GGGGGCGGGCCCCGGGCGGGGTGGGG	GGGGGCGGACCCCGGGCGGGGTGGGG	0	1
CTDP1	chr18	77511306	77511332	rs1197435885	77511307	G	A	0	GGGCAGGCCAGGGAGGGAGGGGCTGGG	GGACAGGCCAGGGAGGGAGGGGCTGGG	0	1
CACNA1C	chr12	2691912	2691935	rs1197733829	2691914	G	A	0	GGGGCAGGGCAGGGTGGTTTTGGG	GGGACAGGGCAGGGTGGTTTTGGG	0	1
ITPR1	chr3	4609228	4609258	rs1198173004	4609237	G	A	0	GGGCTTGGGGGCTGAGGTGGGTCATGGAGGG	GGGCTTGGGGACTGAGGTGGGTCATGGAGGG	0	1
CNTNAP2	chr7	146722560	146722590	rs1198698819	146722577	G	A	0	GGGGGAGGGGGAGGGGACGGGAGGGGAGGGG	GGGGGAGGGGGAGGGGACAGGAGGGGAGGGG	0	1
ITGA3	chr17	48141573	48141600	rs1198822608	48141581	G	A	0	GGGGAAGGGGCTGGGGAGGGGTGCTGGG	GGGGAAGGGACTGGGGAGGGGTGCTGGG	0	1
CACNA1D	chr3	53676101	53676123	rs1198844690	53676115	G	C	0	GGGGAGGGGAGGGGAGAGAAGGG	GGGGAGGGGAGGGGACAGAAGGG	0	1
TAB2	chr6	149639363	149639386	rs1199201705	149639373	G	A	0	GGGGGTGGGGAGCATCGGGCCGGG	GGGGGTGGGGAACATCGGGCCGGG	0	1
FOLR1	chr11	71903388	71903417	rs1199630854	71903401	T	C	0	GGGCCAGGGGGTGATCTGGGGTGGTGAGGG	GGGCCAGGGGGTGACCTGGGGTGGTGAGGG	0	1
ARHGEF10	chr8	1772143	1772172	rs1203077952	1772156	G	T	0	GGGTCGCGGGGGACGCGGGGGACGCGGGGG	GGGTCGCGGGGGACTCGGGGGACGCGGGGG	0	1
RFX6	chr6	117198589	117198619	rs1204644328	117198605	G	A	0	GGGCAGCCCGGGGGCGAGCAGGGCGGCGGGG	GGGCAGCCCGGGGGCGAACAGGGCGGCGGGG	0	1
UVSSA	chr4	1372856	1372878	rs1205128240	1372869	G	A	0	GGGGTGAGGGCGGGGCTGCTGGG	GGGGTGAGGGCGGGACTGCTGGG	0	1
ACADVL	chr17	7123637	7123666	rs1206754919	7123658	C	A	0	GGGGAAAGGGCAAGCCAGGGTGCCCTAGGG	GGGGAAAGGGCAAGCCAGGGTGACCTAGGG	0	1
RNF213	chr17	78329133	78329164	rs1212465203	78329161	G	A	0	GGGCTTACAGGGGAAGAAGCGGGGTGAACGGG	GGGCTTACAGGGGAAGAAGCGGGGTGAACAGG	0	1
SETBP1	chr18	42475153	42475183	rs1212913085	42475176	G	C	0	GGGAGGGGAGGGGAGGGGAGGGAAGAAAGGG	GGGAGGGGAGGGGAGGGGAGGGAACAAAGGG	0	1
EGFR	chr7	55289022	55289042	rs1213884660	55289037	G	C	0	GGGAGAGGGAGAGGGAGAGGG	GGGAGAGGGAGAGGGACAGGG	0	1
TGFBR2	chr3	30648488	30648519	rs1221982872	30648489	G	A	0	GGGCTCGGCGGGGCGCCGGGGGTCTTCCTGGG	GGACTCGGCGGGGCGCCGGGGGTCTTCCTGGG	0	1
TBC1D24	chr16	2548832	2548855	rs1223844374	2548848	C	A	0	GGGAGCTCTGGGTTGGGCCTGGGG	GGGAGCTCTGGGTTGGGACTGGGG	0	1
CD81	chr11	2405559	2405586	rs1224239176	2405563	G	C	0	GGGAAGCGGGGCGTCTCGGGAGGTGGGG	GGGAACCGGGGCGTCTCGGGAGGTGGGG	0	1
C10orf11	chr10	77510237	77510263	rs1225019225	77510253	G	A	0	GGGGCGGGGGGTGGGGGGCAGAGGGGG	GGGGCGGGGGGTGGGGGACAGAGGGGG	0	1
CACNA1H	chr16	1245239	1245259	rs1225474042	1245241	G	A	0	GGGGCTGGGGGTGGGGCAGGG	GGGACTGGGGGTGGGGCAGGG	0	1
ALDOA	chr16	30081370	30081393	rs1228689182	30081371	G	A	0	GGGCAGGGTGCCTGGGTGGATGGG	GGACAGGGTGCCTGGGTGGATGGG	0	1
AP4M1	chr7	99705728	99705754	rs1230633909	99705745	G	A	0	GGGTCAGCGTGGGCCGGGGCTGCGGGG	GGGTCAGCGTGGGCCGGGACTGCGGGG	0	1
FRAS1	chr4	79252546	79252568	rs1232797869	79252548	G	A	0	GGGGCAGGGTGCTAGGGGTGGGG	GGGACAGGGTGCTAGGGGTGGGG	0	1
CETP	chr16	57007429	57007451	rs1234497980	57007440	G	A	0	GGGTGGGGCTGGGCTGCTAGGGG	GGGTGGGGCTGGACTGCTAGGGG	0	1
NDUFAF6	chr8	96037464	96037486	rs1234952786	96037468	G	C	0	GGGAAGCGGGGTCCCGGGGTGGG	GGGAACCGGGGTCCCGGGGTGGG	0	1
FRAS1	chr4	78980118	78980141	rs1235818196	78980132	G	A	0	GGGAGGGGGAAGGGAGCCGGCGGG	GGGAGGGGGAAGGGAACCGGCGGG	0	1
SLC22A12	chr11	64366716	64366738	rs12361424	64366718	G	A	0	GGGGCCAGGGAGGGCGGAGAGGG	GGGACCAGGGAGGGCGGAGAGGG	0	1
CAPN10	chr2	241538629	241538652	rs1238613082	241538631	G	A	0	GGGGCTGGGGGCCTGGGAGGTGGG	GGGACTGGGGGCCTGGGAGGTGGG	0	1
C10orf11	chr10	78000857	78000882	rs1240102261	78000860	T	A	0	GGGGTCTTGGGGGAAAGGTGGGTGGG	GGGGACTTGGGGGAAAGGTGGGTGGG	0	1
ITGB4	chr17	73732779	73732801	rs1240316990	73732787	G	A	0	GGGGCAGGGGCTGAGGGTTGGGG	GGGGCAGGGACTGAGGGTTGGGG	0	1
TUBA8	chr22	18607084	18607101	rs1243007504	18607085	G	A	0	GGGCAGGGGACGGGTGGG	GGACAGGGGACGGGTGGG	0	1
D2HGDH	chr2	242674683	242674713	rs1247913998	242674696	G	A	0	GGGGTGCTCCGGGAGCCGCGGGTTCTTGGGG	GGGGTGCTCCGGGAACCGCGGGTTCTTGGGG	0	1
EGFR	chr7	55289022	55289042	rs1248797820	55289031	G	C	0	GGGAGAGGGAGAGGGAGAGGG	GGGAGAGGGACAGGGAGAGGG	0	1
MYH14	chr19	50729283	50729306	rs1249223240	50729300	G	A	0	GGGTCTGAGGGAGGAGGGGCTGGG	GGGTCTGAGGGAGGAGGGACTGGG	0	1
BEAN1	chr16	66508475	66508497	rs1251492200	66508482	G	C	0	GGGAGGGAGAGAGGGAGGGAGGG	GGGAGGGACAGAGGGAGGGAGGG	0	1
PKP1	chr1	201292454	201292476	rs1251553207	201292462	G	A	0	GGGCTCTGGGCTGGGCAATGGGG	GGGCTCTGGACTGGGCAATGGGG	0	1
RYR2	chr1	237308357	237308388	rs1252303251	237308359	G	A	0	GGGGCCTGTCGGGGGGTTGGGGGAGCTAGGGG	GGGACCTGTCGGGGGGTTGGGGGAGCTAGGGG	0	1
TRIOBP	chr22	38161836	38161857	rs1255611228	38161851	G	A	0	GGGGGGGGCACAGTGGGCTGGG	GGGGGGGGCACAGTGGACTGGG	0	1
GPR98	chr5	90082056	90082085	rs1255623496	90082058	G	A	0	GGGGCCTATTGGGGGGTGGGGGGCTAGGGG	GGGACCTATTGGGGGGTGGGGGGCTAGGGG	0	1
DPP6	chr7	154448071	154448100	rs1257576971	154448086	G	A	0	GGGAGGTGGGGGGAGAGCTGGGAGAAGGGG	GGGAGGTGGGGGGAGAACTGGGAGAAGGGG	0	1
PALLD	chr4	169754372	169754404	rs1263907520	169754376	G	T	0	GGGACGGAAGGGGGCGCGCTGGGCAGGAGAGGG	GGGACTGAAGGGGGCGCGCTGGGCAGGAGAGGG	0	1
MYO7A	chr11	76922381	76922405	rs1265520260	76922397	G	A	0	GGGTGAGCATGGGGTGGGCATCGGG	GGGTGAGCATGGGGTGGACATCGGG	0	1
MEGF8	chr19	42866838	42866863	rs1269602554	42866855	G	A	0	GGGTCTGAGGGAGGAGGGGCTGGGGG	GGGTCTGAGGGAGGAGGGACTGGGGG	0	1
PDHX	chr11	34937939	34937966	rs1269692849	34937962	G	A	0	GGGCAGCCCGGGGGCGGGGCGAACGGGG	GGGCAGCCCGGGGGCGGGGCGAACAGGG	0	1
MEGF8	chr19	42866801	42866826	rs1272149891	42866818	G	A	0	GGGTCTGAGGGAGGAGGGGCTGGGGG	GGGTCTGAGGGAGGAGGGACTGGGGG	0	1
BSG	chr19	582426	582455	rs1272165393	582448	G	A	0	GGGGGTCCTGGGGGCCGGGGTGGGCAGGGG	GGGGGTCCTGGGGGCCGGGGTGGACAGGGG	0	1
TRIM24	chr7	138145680	138145708	rs1272881032	138145684	G	A	0	GGGGAGCCCGGGGAGAGGGCCAGGAGGGG	GGGGAACCCGGGGAGAGGGCCAGGAGGGG	0	1
G6PC3	chr17	42148212	42148237	rs1279632390	42148219	G	A	0	GGGGCGGGGCCTGGGGCTCAGAGGGG	GGGGCGGGACCTGGGGCTCAGAGGGG	0	1
CTDP1	chr18	77511022	77511051	rs1281012222	77511032	G	A	0	GGGCGCCGAGGGCAGGTCAGGGAGGGAGGG	GGGCGCCGAGGACAGGTCAGGGAGGGAGGG	0	1
TBX1	chr22	19748198	19748227	rs1282128559	19748209	G	A	0	GGGGGTGGGGGGGCCCCGGGCGGGGCGGGG	GGGGGTGGGGGGACCCCGGGCGGGGCGGGG	0	1
CFD	chr19	862274	862300	rs1288385731	862288	T	C	0	GGGTTAGGGTGGGAATAGGGGGCGGGG	GGGTTAGGGTGGGAACAGGGGGCGGGG	0	1
ESRRB	chr14	76964963	76964987	rs1290373716	76964983	G	A	0	GGGTGCAGTGGGGTGGGGGACGGGG	GGGTGCAGTGGGGTGGGGGACAGGG	0	1
PLOD1	chr1	12031282	12031308	rs1291328799	12031300	G	A	0	GGGGGGCTTGGGTGGAAGGGCCAGGGG	GGGGGGCTTGGGTGGAAGGACCAGGGG	0	1
MED25	chr19	50334723	50334751	rs1292423059	50334742	G	A	0	GGGGCCTGAGGGTCCATTGGGCACTTGGG	GGGGCCTGAGGGTCCATTGGACACTTGGG	0	1
SPINT2	chr19	38742816	38742843	rs1294621901	38742827	G	A	0	GGGCAGGTTGGGGCCGGGGGTGGTGGGG	GGGCAGGTTGGGACCGGGGGTGGTGGGG	0	1
GPC6	chr13	94740798	94740826	rs1295342083	94740814	G	A	0	GGGAAGGGAAGGGAAGGGCAGGGGAGGGG	GGGAAGGGAAGGGAAGGACAGGGGAGGGG	0	1
INF2	chr14	105181125	105181149	rs1295576394	105181138	G	A	0	GGGCCCGGGGCCGGGCCTCAAAGGG	GGGCCCGGGGCCGGACCTCAAAGGG	0	1
D2HGDH	chr2	242706313	242706342	rs1295797198	242706319	G	C	0	GGGAGAAGTTGGGGAGATGGGAGCCCCGGG	GGGAGAACTTGGGGAGATGGGAGCCCCGGG	0	1
RNF213	chr17	78329447	78329476	rs1295870819	78329455	G	A	0	GGGGTGGACGGGAATGGGGGCTTACAGGGG	GGGGTGGACAGGAATGGGGGCTTACAGGGG	0	1
SH3BP2	chr4	2826932	2826959	rs1295900234	2826933	G	A	0	GGGCCCAGGGCATACCGGGCAGTGAGGG	GGACCCAGGGCATACCGGGCAGTGAGGG	0	1
GLI2	chr2	121605324	121605343	rs1297175909	121605328	G	A	0	GGGGGGCAGGGGCGGGGGGG	GGGGGACAGGGGCGGGGGGG	0	1
FREM2	chr13	39353353	39353382	rs1297656989	39353355	G	A	0	GGGGCTTGTCGGGGGGTGGAGGGAAAGGGG	GGGACTTGTCGGGGGGTGGAGGGAAAGGGG	0	1
DNM2	chr19	10829206	10829231	rs1298237250	10829221	G	A	0	GGGGTCGGGGAGGCGGGCCCTGTGGG	GGGGTCGGGGAGGCGGACCCTGTGGG	0	1
FIP1L1	chr4	54767763	54767791	rs1300270140	54767784	G	C	0	GGGGGAAGGGAAGGGGAGGGGAGAAAGGG	GGGGGAAGGGAAGGGGAGGGGACAAAGGG	0	1
ZAP70	chr2	98356142	98356165	rs1302710415	98356146	G	A	0	GGGGAGCAGGGAGGTCCGGGAGGG	GGGGAACAGGGAGGTCCGGGAGGG	0	1
HGSNAT	chr8	43036252	43036272	rs1303059186	43036261	G	C	0	GGGAGAGGGAGAGGGAGAGGG	GGGAGAGGGACAGGGAGAGGG	0	1
D2HGDH	chr2	242706813	242706842	rs1304704431	242706819	G	C	0	GGGAGAAGTTGGGGAGATGGGAGCCCCGGG	GGGAGAACTTGGGGAGATGGGAGCCCCGGG	0	1
MED25	chr19	50338872	50338899	rs1304947091	50338873	G	A	0	GGGCTGGCGGGGTCGGGGCTGGGTTGGG	GGACTGGCGGGGTCGGGGCTGGGTTGGG	0	1
BEAN1	chr16	66508451	66508469	rs1306322278	66508460	G	C	0	GGGAGGGAGAGAGGGAGGG	GGGAGGGAGACAGGGAGGG	0	1
MYH14	chr19	50729395	50729420	rs1308912834	50729397	T	A	0	GGGTCTGAGGGAGGAGGGGCTGGGGG	GGGACTGAGGGAGGAGGGGCTGGGGG	0	1
B4GALT7	chr5	177031894	177031914	rs1309272659	177031898	T	C	0	GGGGATTAGGGAAAGGGAGGG	GGGGACTAGGGAAAGGGAGGG	0	1
CSF2RB	chr22	37319422	37319445	rs1310604689	37319432	C	A	0	GGGGGCAGGGGCCACGGGCAGGGG	GGGGGCAGGGGACACGGGCAGGGG	0	1
RNASEH2B	chr13	51518191	51518218	rs1310771880	51518200	G	A	0	GGGATGGGACGGGATGGGATGGGATGGG	GGGATGGGACAGGATGGGATGGGATGGG	0	1
ST14	chr11	130070035	130070057	rs1310789643	130070048	G	A	0	GGGTCTCTGGGTGGGCAGCAGGG	GGGTCTCTGGGTGGACAGCAGGG	0	1
JPH3	chr16	87635694	87635714	rs1312687594	87635701	G	A	0	GGGGGCGGGCAGGGGCGAGGG	GGGGGCGGACAGGGGCGAGGG	0	1
CNNM2	chr10	104678874	104678903	rs1313043976	104678877	G	A	0	GGGGGCAAGGGTGGCTCGGGGGTGGCCGGG	GGGGACAAGGGTGGCTCGGGGGTGGCCGGG	0	1
CCM2	chr7	45040047	45040071	rs1316060684	45040063	G	A	0	GGGGCCCGGGGGGGGGGGCAGTGGG	GGGGCCCGGGGGGGGGGACAGTGGG	0	1
INF2	chr14	105174501	105174527	rs1317481499	105174506	G	A	0	GGGGACGGGGGAGGAGCAGGGCAGGGG	GGGGACAGGGGAGGAGCAGGGCAGGGG	0	1
HGSNAT	chr8	43036348	43036368	rs1325316400	43036357	G	C	0	GGGAGAGGGAGAGGGAGAGGG	GGGAGAGGGACAGGGAGAGGG	0	1
RYR1	chr19	38993440	38993467	rs1325414666	38993442	G	A	0	GGGGCAGGGGGAGGAGCAGGGGCAGGGG	GGGACAGGGGGAGGAGCAGGGGCAGGGG	0	1
SMOC2	chr6	169004005	169004032	rs1326452150	169004022	G	A	0	GGGTGTCATAGGGGTGGGGCAGATGGGG	GGGTGTCATAGGGGTGGGACAGATGGGG	0	1
MED25	chr19	50340044	50340073	rs1332216793	50340055	G	A	0	GGGCCCTCCTGGGCCCAAGGGCCTACTGGG	GGGCCCTCCTGGACCCAAGGGCCTACTGGG	0	1
HGSNAT	chr8	43036276	43036296	rs1337938094	43036291	G	C	0	GGGAGAGGGAGAGGGAGAGGG	GGGAGAGGGAGAGGGACAGGG	0	1
CAMTA1	chr1	7537120	7537147	rs1339351331	7537121	G	A	0	GGGCAAGGGGGTGTGAGGGAGGCCAGGG	GGACAAGGGGGTGTGAGGGAGGCCAGGG	0	1
MXI1	chr10	111986471	111986492	rs1340085677	111986477	G	A	0	GGGAGGGGCATGTGGGGAAGGG	GGGAGGGACATGTGGGGAAGGG	0	1
FAM20C	chr7	286149	286172	rs1343522315	286156	G	A	0	GGGTCAGGGCCACGGGGAGCTGGG	GGGTCAGGACCACGGGGAGCTGGG	0	1
CA4	chr17	58235815	58235835	rs1343908946	58235828	G	A	0	GGGCCTGGGGCAGGGCATGGG	GGGCCTGGGGCAGGACATGGG	0	1
CEP164	chr11	117198893	117198916	rs1345061832	117198894	G	A	0	GGGCCACCGGGCCCGGGCTGGGGG	GGACCACCGGGCCCGGGCTGGGGG	0	1
CNTNAP2	chr7	146722401	146722421	rs1345404542	146722415	G	A	0	GGGGAGGGGTGGGGGGCAGGG	GGGGAGGGGTGGGGGACAGGG	0	1
FLNC	chr7	128491006	128491031	rs1346144173	128491013	G	A	0	GGGGCTGGGCTGGGCTGGGGCTTGGG	GGGGCTGGACTGGGCTGGGGCTTGGG	0	1
TBX19	chr1	168274462	168274483	rs1348713692	168274470	G	A	0	GGGGTATGGGCTGGGGTGGGGG	GGGGTATGGACTGGGGTGGGGG	0	1
ESRRB	chr14	76800540	76800563	rs1351357164	76800543	C	A	0	GGGGCCTGGGTGGGTGGCGAGGGG	GGGGACTGGGTGGGTGGCGAGGGG	0	1
DOK7	chr4	3475373	3475394	rs1351379585	3475382	G	A	0	GGGGGCCGGGGCCGGGCGGGGG	GGGGGCCGGGACCGGGCGGGGG	0	1
GCDH	chr19	13002547	13002574	rs1352129537	13002550	C	T	0	GGGGCGACATGGGTGTTGGGGGGTAGGG	GGGGTGACATGGGTGTTGGGGGGTAGGG	0	1
AQP1	chr7	30961875	30961903	rs1353451453	30961893	G	A	0	GGGGGAAGGGAGGGCGGGGGCTGGTGGGG	GGGGGAAGGGAGGGCGGGGACTGGTGGGG	0	1
KAT6B	chr10	76586779	76586810	rs1356338594	76586801	T	C	0	GGGCGGAGGGGGGCGGGGCGGGATCGGGTGGG	GGGCGGAGGGGGGCGGGGCGGGACCGGGTGGG	0	1
DCC	chr18	50694925	50694957	rs1357820373	50694950	G	A	0	GGGTCTGTCTGGGGGCGGGCGGGGGGGCTAGGG	GGGTCTGTCTGGGGGCGGGCGGGGGGACTAGGG	0	1
KCTD7	chr7	66159464	66159492	rs1359587759	66159484	G	A	0	GGGCCCGGCGGGGCCTGGAGGGCAGTGGG	GGGCCCGGCGGGGCCTGGAGGACAGTGGG	0	1
PLOD1	chr1	12031170	12031193	rs1360737164	12031180	G	A	0	GGGGCGGGGGGGCAGGGGTGAGGG	GGGGCGGGGGGACAGGGGTGAGGG	0	1
SLC22A18	chr11	2943876	2943902	rs1362312809	2943894	G	A	0	GGGGTGGGTAGGGTGGGGGGCCTGGGG	GGGGTGGGTAGGGTGGGGGACCTGGGG	0	1
MED25	chr19	50322210	50322235	rs1364034625	50322212	G	A	0	GGGGCCTGGGCTCCTGGGTCTGAGGG	GGGACCTGGGCTCCTGGGTCTGAGGG	0	1
ST3GAL3	chr1	44337483	44337514	rs1364108864	44337505	G	C	0	GGGAGAGGCTGGGGTGTGAGGGAGAGGAGGGG	GGGAGAGGCTGGGGTGTGAGGGACAGGAGGGG	0	1
GRM1	chr6	146588786	146588818	rs1364153538	146588802	G	A	0	GGGCTGGGCTGGGCTGGGCTGGGCTGGGCTGGG	GGGCTGGGCTGGGCTGGACTGGGCTGGGCTGGG	0	1
MUC5B	chr11	1279440	1279462	rs1365613099	1279442	G	A	0	GGGGCTGGGGCCGGGCTCCTGGG	GGGACTGGGGCCGGGCTCCTGGG	0	1
PLCB1	chr20	8301464	8301490	rs1369068344	8301475	G	C	0	GGGAGGGAGGGAGAGAGGGAGGGAGGG	GGGAGGGAGGGACAGAGGGAGGGAGGG	0	1
SLC6A19	chr5	1214993	1215023	rs1369089885	1215013	G	A	0	GGGTGTGAGGGGCGGGGCTGGGCAGGGAGGG	GGGTGTGAGGGGCGGGGCTGGACAGGGAGGG	0	1
LFNG	chr7	2560850	2560870	rs1369287149	2560864	G	A	0	GGGCGACGGGGAGGGGCAGGG	GGGCGACGGGGAGGGACAGGG	0	1
KISS1R	chr19	918687	918716	rs1373064317	918709	G	A	0	GGGGAGAGGGCGCACTTGGGGACGGGCGGG	GGGGAGAGGGCGCACTTGGGGACAGGCGGG	0	1
MEGF8	chr19	42872821	42872846	rs1373349005	42872829	G	A	0	GGGCTTTGGGCACTGGGGGAGAGGGG	GGGCTTTGGACACTGGGGGAGAGGGG	0	1
CFD	chr19	862499	862524	rs1374208553	862516	G	A	0	GGGGCGGGGCATGGGGACGGGGCGGG	GGGGCGGGGCATGGGGACAGGGCGGG	0	1
ADSL	chr22	40742728	40742757	rs1376469887	40742754	G	A	0	GGGCTGAGGGGCTGGGCCGGGAGGGACGGG	GGGCTGAGGGGCTGGGCCGGGAGGGACAGG	0	1
NOP56	chr20	2633379	2633399	rs1376834271	2633381	C	A	0	GGGCCTGGGCCTGGGCCTGGG	GGGACTGGGCCTGGGCCTGGG	0	1
FOXN1	chr17	26862215	26862238	rs1381854478	26862220	G	A	0	GGGTGAGCTGGGGGTGGGAAAGGG	GGGTGAACTGGGGGTGGGAAAGGG	0	1
EIF2B5	chr3	183903925	183903945	rs1383430310	183903928	G	A	0	GGGGGCAGGGCGGGGGGCGGG	GGGGACAGGGCGGGGGGCGGG	0	1
ATP2C1	chr3	130613163	130613186	rs1383816757	130613168	T	A	0	GGGCTGTCCGGGGCTTTGGGTGGG	GGGCTGACCGGGGCTTTGGGTGGG	0	1
TBC1D24	chr16	2550508	2550532	rs1388673572	2550510	G	A	0	GGGGCTCTGGGATGAGGGTGTGGGG	GGGACTCTGGGATGAGGGTGTGGGG	0	1
CCM2	chr7	45109578	45109598	rs1390896335	45109579	G	A	0	GGGCAGCGGGTGGGAGCAGGG	GGACAGCGGGTGGGAGCAGGG	0	1
GNA11	chr19	3095000	3095022	rs1391557202	3095012	G	A	0	GGGTCGGGGCGGGGCCCTCCGGG	GGGTCGGGGCGGGACCCTCCGGG	0	1
EGFR	chr7	55289022	55289042	rs1393232128	55289025	G	C	0	GGGAGAGGGAGAGGGAGAGGG	GGGACAGGGAGAGGGAGAGGG	0	1
GHRHR	chr7	31006013	31006036	rs1397016976	31006027	G	A	0	GGGGTGGGGGTGGGGGCCATGGGG	GGGGTGGGGGTGGGGACCATGGGG	0	1
D2HGDH	chr2	242704913	242704942	rs1397847217	242704919	G	C	0	GGGAGAAGTTGGGGAGATGGGAGCCCCGGG	GGGAGAACTTGGGGAGATGGGAGCCCCGGG	0	1
NBEAL2	chr3	47048851	47048869	rs1397882975	47048852	G	A	0	GGGCTGTGGGTGGGGTGGG	GGACTGTGGGTGGGGTGGG	0	1
ANO5	chr11	22290812	22290834	rs1398341081	22290828	G	C	0	GGGAAGGGAAGGGAAGAGAAGGG	GGGAAGGGAAGGGAAGACAAGGG	0	1
CHAT	chr10	50822215	50822240	rs1398987479	50822223	G	A	0	GGGCGGGGAGCTGGGGAAGGGATGGG	GGGCGGGGAACTGGGGAAGGGATGGG	0	1
MYH14	chr19	50775994	50776015	rs1399539668	50776004	G	A	0	GGGTGGGGTGGGCTTGGTGGGG	GGGTGGGGTGGACTTGGTGGGG	0	1
EPB41L1	chr20	34765985	34766004	rs1400239295	34765986	G	A	0	GGGCTAGGGAGCAGGGTGGG	GGACTAGGGAGCAGGGTGGG	0	1
TTC7A	chr2	47168182	47168209	rs1401349313	47168201	T	G	0	GGGCGGCGGCGGGGGGCGGGTACCCGGG	GGGCGGCGGCGGGGGGCGGGGACCCGGG	0	1
PAX7	chr1	18966476	18966503	rs1401489424	18966495	A	C	0	GGGGACGGGGCGGGGGGGAAATCCTGGG	GGGGACGGGGCGGGGGGGAACTCCTGGG	0	1
RNF213	chr17	78329133	78329164	rs1401747035	78329147	G	C	0	GGGCTTACAGGGGAAGAAGCGGGGTGAACGGG	GGGCTTACAGGGGAACAAGCGGGGTGAACGGG	0	1
OTOG	chr11	17591970	17591995	rs1401769019	17591979	G	A	0	GGGGAAATGGGCCCCTTAGGGCTGGG	GGGGAAATGGACCCCTTAGGGCTGGG	0	1
ROBO2	chr3	77366973	77367005	rs1402405281	77366985	G	A	0	GGGCTGCTGGGGGGCTGCTAGGGGGCTGCTGGG	GGGCTGCTGGGGGACTGCTAGGGGGCTGCTGGG	0	1
KCNQ1	chr11	2593342	2593367	rs1403816592	2593346	G	A	0	GGGTGGCCCGGGTTAGGGGTGCGGGG	GGGTGACCCGGGTTAGGGGTGCGGGG	0	1
SLC12A3	chr16	56916465	56916494	rs1409466727	56916487	G	A	0	GGGGCATGGGGTGGGAGTGGGAGGCATGGG	GGGGCATGGGGTGGGAGTGGGAGACATGGG	0	1
CTDP1	chr18	77511068	77511096	rs1410694865	77511069	G	A	0	GGGCAGGTCAGGGAGGGAGGGAGGCTGGG	GGACAGGTCAGGGAGGGAGGGAGGCTGGG	0	1
D2HGDH	chr2	242705263	242705292	rs1414869833	242705269	G	C	0	GGGAGAAGTTGGGGAGATGGGAGCCCCGGG	GGGAGAACTTGGGGAGATGGGAGCCCCGGG	0	1
CTDP1	chr18	77477192	77477220	rs1416999673	77477198	G	A	0	GGGTGTAGCCGGGTGGGGGCCCTGGTGGG	GGGTGTAACCGGGTGGGGGCCCTGGTGGG	0	1
ESR1	chr6	152156008	152156035	rs1423313436	152156009	G	A	0	GGGCAGGCAAGGGTGAGGGTGCAGGGGG	GGACAGGCAAGGGTGAGGGTGCAGGGGG	0	1
AQP1	chr7	30937433	30937458	rs1424765719	30937450	G	A	0	GGGTCTGGGTTGTCAGGGGCAAGGGG	GGGTCTGGGTTGTCAGGGACAAGGGG	0	1
DPP6	chr7	154585919	154585946	rs1425080285	154585921	G	A	0	GGGGCTGTGGGGGTGGAGGGGAGACGGG	GGGACTGTGGGGGTGGAGGGGAGACGGG	0	1
C10orf11	chr10	77885005	77885031	rs1426450835	77885025	G	A	0	GGGGTGGAGGGCTAGGGGGAAGCTGGG	GGGGTGGAGGGCTAGGGGGAAACTGGG	0	1
FIP1L1	chr4	54966752	54966779	rs1428470706	54966763	G	A	0	GGGGGCGCAGGGGCCGGGGTTACCGGGG	GGGGGCGCAGGGACCGGGGTTACCGGGG	0	1
PLCB1	chr20	8301464	8301490	rs1428751146	8301477	G	C	0	GGGAGGGAGGGAGAGAGGGAGGGAGGG	GGGAGGGAGGGAGACAGGGAGGGAGGG	0	1
PAX7	chr1	18973477	18973501	rs1428770423	18973489	C	A	0	GGGAGGGCTGGGGCCTTGGGCGGGG	GGGAGGGCTGGGGACTTGGGCGGGG	0	1
HGSNAT	chr8	43036252	43036272	rs1436343432	43036267	G	C	0	GGGAGAGGGAGAGGGAGAGGG	GGGAGAGGGAGAGGGACAGGG	0	1
CC2D2A	chr4	15537921	15537949	rs1437426491	15537922	G	A	0	GGGCCTGTCGGGGGTGGGAGGGTTGGGGG	GGACCTGTCGGGGGTGGGAGGGTTGGGGG	0	1
ALPL	chr1	21870421	21870444	rs1441196376	21870433	G	A	0	GGGAGCTGGGTGGGCTTGGATGGG	GGGAGCTGGGTGGACTTGGATGGG	0	1
MYLK2	chr20	30409576	30409598	rs1447497565	30409578	G	A	0	GGGGCCAGGGGGAGGGAAGGGGG	GGGACCAGGGGGAGGGAAGGGGG	0	1
COL18A1	chr21	46927060	46927084	rs1451720371	46927061	G	A	0	GGGCTGGGAGGGCCGGGTGTTGGGG	GGACTGGGAGGGCCGGGTGTTGGGG	0	1
SYNGAP1	chr6	33405830	33405860	rs1453296803	33405844	G	A	0	GGGGCTCGGGGGGTGGCTCAGGGGGCAAGGG	GGGGCTCGGGGGGTGACTCAGGGGGCAAGGG	0	1
CACNA1H	chr16	1242629	1242653	rs1459335622	1242642	T	G	0	GGGGCCAGCTGGGGTACAGGGAGGG	GGGGCCAGCTGGGGGACAGGGAGGG	0	1
IGF1R	chr15	99236110	99236136	rs1460238301	99236112	G	A	0	GGGGCCTCAGGGTGGGGTAAGCCTGGG	GGGACCTCAGGGTGGGGTAAGCCTGGG	0	1
EIF2B5	chr3	184301633	184301661	rs1462006084	184301654	G	A	0	GGGGGGGAGGGGCTGTGCGGGGGCAGGGG	GGGGGGGAGGGGCTGTGCGGGGACAGGGG	0	1
ROBO2	chr3	77366973	77367005	rs1464769955	77366996	G	A	0	GGGCTGCTGGGGGGCTGCTAGGGGGCTGCTGGG	GGGCTGCTGGGGGGCTGCTAGGGGACTGCTGGG	0	1
AGRN	chr1	976325	976349	rs1467666450	976340	C	A	0	GGGAGGGGCTTCGGGGCCAGTGGGG	GGGAGGGGCTTCGGGGACAGTGGGG	0	1
ADAMTSL4	chr1	150530110	150530133	rs1468650421	150530113	G	A	0	GGGAGCCCACGGGGAGGGTTAGGG	GGGAACCCACGGGGAGGGTTAGGG	0	1
EIF2B5	chr3	184119491	184119515	rs1470871913	184119500	G	A	0	GGGCTGTAGGGCTGGAGGGGGTGGG	GGGCTGTAGGACTGGAGGGGGTGGG	0	1
MUC5B	chr11	1245678	1245709	rs1472418847	1245694	C	A	0	GGGCAGGGGAGGGGCTGCCTGGGGGGGAGGGG	GGGCAGGGGAGGGGCTGACTGGGGGGGAGGGG	0	1
SLC24A4	chr14	92926374	92926399	rs1473831753	92926375	G	A	0	GGGCCAGGGGCCGCGGGAAGAGGGGG	GGACCAGGGGCCGCGGGAAGAGGGGG	0	1
COL6A1	chr21	47410462	47410494	rs1473919249	47410481	G	A	0	GGGGAAGGACGGGGAGGGACGGGGAGGGATGGG	GGGGAAGGACGGGGAGGGACAGGGAGGGATGGG	0	1
COL6A1	chr21	47410462	47410494	rs1480570769	47410471	G	A	0	GGGGAAGGACGGGGAGGGACGGGGAGGGATGGG	GGGGAAGGACAGGGAGGGACGGGGAGGGATGGG	0	1
KISS1R	chr19	917938	917962	rs1480798001	917944	C	A	0	GGGCGGGCCCGGGCGGGCCGGAGGG	GGGCGGGACCGGGCGGGCCGGAGGG	0	1
BEST1	chr11	61719443	61719464	rs1488178170	61719444	G	A	0	GGGCTGGGCCGGGGGGCCTGGG	GGACTGGGCCGGGGGGCCTGGG	0	1
TMC8	chr17	76128070	76128093	rs1488855413	76128079	G	A	0	GGGGCCTTGGGCTCTGGGAGGGGG	GGGGCCTTGGACTCTGGGAGGGGG	0	1
IDUA	chr4	996272	996297	rs1553917318	996277	G	A	0	GGGTGAGCCGGGGCCGCTGGGGTGGG	GGGTGAACCGGGGCCGCTGGGGTGGG	0	1
NCF1	chr7	74198001	74198028	rs1554414167	74198022	G	A	0	GGGGTGTGGGAGAAAGGGGCAGGCAGGG	GGGGTGTGGGAGAAAGGGGCAGACAGGG	0	1
ELN	chr7	73457532	73457556	rs1554669955	73457543	G	A	0	GGGCAGGGAGGGGCAGAGGGCAGGG	GGGCAGGGAGGGACAGAGGGCAGGG	0	1
CD4	chr12	6925586	6925603	rs1555117988	6925596	G	A	0	GGGAGGGGTGGGCAGGGG	GGGAGGGGTGGACAGGGG	0	1
ATN1	chr12	7037756	7037782	rs1555142831	7037759	G	A	0	GGGGGCCAGGGTTTCGGGAGGATCGGG	GGGGACCAGGGTTTCGGGAGGATCGGG	0	1
CAMTA1	chr1	7625141	7625171	rs1557925423	7625143	G	A	0	GGGGCTGTGGGTGCCAGGGGGCTCCCTGGGG	GGGACTGTGGGTGCCAGGGGGCTCCCTGGGG	0	1
CHRM3	chr1	239590923	239590948	rs1558215840	239590925	G	A	0	GGGGCCCAGGGCAGGGTCAAGAAGGG	GGGACCCAGGGCAGGGTCAAGAAGGG	0	1
DIS3L2	chr2	233207498	233207523	rs1559225500	233207505	G	A	0	GGGCTGGGGCCCCTGGGAGCCCAGGG	GGGCTGGGACCCCTGGGAGCCCAGGG	0	1
D2HGDH	chr2	242706363	242706392	rs1559403589	242706369	G	C	0	GGGAGAAGTTGGGGAGATGGGAGCCCCGGG	GGGAGAACTTGGGGAGATGGGAGCCCCGGG	0	1
HEATR2	chr7	817196	817221	rs1562401172	817199	G	C	0	GGGAGAAAGGGGATGGGGTGGGCGGG	GGGACAAAGGGGATGGGGTGGGCGGG	0	1
BMP1	chr8	22062586	22062612	rs1563277955	22062598	G	A	0	GGGCAGCAGGGTAGCAGGGTAGGTGGG	GGGCAGCAGGGTAACAGGGTAGGTGGG	0	1
KCNQ1	chr11	2561106	2561128	rs1564810685	2561109	G	C	0	GGGAGCCGGCGGGCCGGGTTGGG	GGGACCCGGCGGGCCGGGTTGGG	0	1
BBS1	chr11	66299295	66299319	rs1565291142	66299298	G	A	0	GGGGGCTCCTGGGTGGGGGTGGGGG	GGGGACTCCTGGGTGGGGGTGGGGG	0	1
LRTOMT	chr11	71808801	71808829	rs1565324381	71808805	C	A	0	GGGGGCCAAGGGGGTGGGGTAGAGATGGG	GGGGGACAAGGGGGTGGGGTAGAGATGGG	0	1
GPC6	chr13	94921215	94921235	rs1566614649	94921225	G	A	0	GGGGCTCATGGGCTGGGAGGG	GGGGCTCATGGACTGGGAGGG	0	1
CACNA1H	chr16	1209636	1209659	rs1567431510	1209645	G	A	0	GGGAGGGGAGGCCTGGGGGCCGGG	GGGAGGGGAGACCTGGGGGCCGGG	0	1
CTNS	chr17	3562317	3562334	rs1567715089	3562328	T	C	0	GGGTGGGAGGGATTGGGG	GGGTGGGAGGGACTGGGG	0	1
MYO9B	chr19	17224136	17224163	rs1568668407	17224137	G	A	0	GGGCCGGGTTGGGGAAGCAGGGCCAGGG	GGACCGGGTTGGGGAAGCAGGGCCAGGG	0	1
ADIPOQ	chr3	186570970	186571000	rs182223755	186570989	G	A	0	GGGCATCCCAGGGCATCCGGGCCATAATGGG	GGGCATCCCAGGGCATCCGGACCATAATGGG	0	1
RAD51B	chr14	68944885	68944915	rs190668310	68944889	G	A	0	GGGAGGCTGGGGGCGGGCATGGGCAAGGGGG	GGGAGACTGGGGGCGGGCATGGGCAAGGGGG	0	1
MMP9	chr20	44638745	44638775	rs201413193	44638747	G	A	0	GGGGCCGTGGGGGCAGCGGGGTGGGGCGGGG	GGGACCGTGGGGGCAGCGGGGTGGGGCGGGG	0	1
TNNT3	chr11	1945541	1945573	rs2734501	1945565	C	A	0	GGGCAGGCGTGGGCGGGTGTGGGCGCACCTGGG	GGGCAGGCGTGGGCGGGTGTGGGCGAACCTGGG	0	1
CAMTA1	chr1	6845480	6845505	rs34262581	6845481	G	A	0	GGGCCGCGGGGCGGGGCCAGGGCGGG	GGACCGCGGGGCGGGGCCAGGGCGGG	0	1
ICAM1	chr19	10395719	10395743	rs34918248	10395725	G	A	0	GGGCAGAGCTGGGTGGGGGCAGGGG	GGGCAGAACTGGGTGGGGGCAGGGG	0	1
SLC29A3	chr10	73079145	73079176	rs35156362	73079147	C	A	0	GGGCCCTGGGGGCGGCTGCGGGCTGCCAGGGG	GGGACCTGGGGGCGGCTGCGGGCTGCCAGGGG	0	1
PRCD	chr17	74525524	74525549	rs370195391	74525546	G	A	0	GGGCAGGGTGGGGAGGGCAGGACGGG	GGGCAGGGTGGGGAGGGCAGGACAGG	0	1
D2HGDH	chr2	242705413	242705442	rs370296274	242705419	G	C	0	GGGAGAAGTTGGGGAGATGGGAGCCCCGGG	GGGAGAACTTGGGGAGATGGGAGCCCCGGG	0	1
ARHGAP26	chr5	142150734	142150756	rs370472021	142150736	G	A	0	GGGGCAGCGCGGGTGGGCGTGGG	GGGACAGCGCGGGTGGGCGTGGG	0	1
RYR1	chr19	38955424	38955452	rs373272125	38955425	G	A	0	GGGCTGGGGAGGTCGAGGGGTCTTGTGGG	GGACTGGGGAGGTCGAGGGGTCTTGTGGG	0	1
IFT43	chr14	76456958	76456981	rs376050235	76456967	G	A	0	GGGGCCTGGGGCAGGGAGGTTGGG	GGGGCCTGGGACAGGGAGGTTGGG	0	1
CDH15	chr16	89256980	89257007	rs377680921	89256981	G	A	0	GGGCTCTGAGGGTCAGAGGGTGTAGGGG	GGACTCTGAGGGTCAGAGGGTGTAGGGG	0	1
NDUFAF6	chr8	95961384	95961412	rs4436093	95961386	C	A	0	GGGCCCGGGCCGTGCGGGGCTGCGCGGGG	GGGACCGGGCCGTGCGGGGCTGCGCGGGG	0	1
RYR1	chr19	39070823	39070847	rs529606679	39070841	G	A	0	GGGTGGTGAAGGGATAAGGGCCGGG	GGGTGGTGAAGGGATAAGGACCGGG	0	1
NT5E	chr6	86179338	86179368	rs533123120	86179350	G	A	0	GGGTCAACGGGGAGCCCTGGGCTTCTTGGGG	GGGTCAACGGGGAACCCTGGGCTTCTTGGGG	0	1
INPPL1	chr11	71936044	71936072	rs533481510	71936054	C	A	0	GGGGCGCCGGGCCCGGGGGGCGCCCTGGG	GGGGCGCCGGGACCGGGGGGCGCCCTGGG	0	1
TRAF3	chr14	103263408	103263428	rs538375429	103263419	G	A	0	GGGAGGGCAAGGGCCAGGGGG	GGGAGGGCAAGGACCAGGGGG	0	1
D2HGDH	chr2	242706713	242706742	rs539497418	242706719	G	C	0	GGGAGAAGTTGGGGAGATGGGAGCCCCGGG	GGGAGAACTTGGGGAGATGGGAGCCCCGGG	0	1
AKAP9	chr7	91704166	91704197	rs542030348	91704168	C	A	0	GGGCCTTTTAGGGGGTGAGGGGTACAGGAGGG	GGGACTTTTAGGGGGTGAGGGGTACAGGAGGG	0	1
SLC2A10	chr20	45342987	45343014	rs543424935	45342994	G	A	0	GGGGCTGGGCACTGAGGGTGGAGGTGGG	GGGGCTGGACACTGAGGGTGGAGGTGGG	0	1
ROBO2	chr3	77589708	77589740	rs548978068	77589721	G	A	0	GGGGCCAGTCGGGGGCAGTGGGGGCGCGCAGGG	GGGGCCAGTCGGGGACAGTGGGGGCGCGCAGGG	0	1
DPP10	chr2	116028222	116028242	rs550571806	116028236	G	A	0	GGGCCAGGGGTGAGGGCAGGG	GGGCCAGGGGTGAGGACAGGG	0	1
WNK4	chr17	40937227	40937256	rs551026644	40937234	T	C	0	GGGTAGAATAGGGCCGCGGGCCGCGGCGGG	GGGTAGAACAGGGCCGCGGGCCGCGGCGGG	0	1
FKRP	chr19	47249346	47249378	rs551160185	47249352	G	A	0	GGGTGAGGCCGGGCCGGGCCGGGCCGGGTTGGG	GGGTGAGACCGGGCCGGGCCGGGCCGGGTTGGG	0	1
FADD	chr11	70049854	70049883	rs560531486	70049876	G	C	0	GGGCGCGGGGCCGGGCCGGGGGAGCCAGGG	GGGCGCGGGGCCGGGCCGGGGGACCCAGGG	0	1
PAX7	chr1	19064927	19064955	rs560749213	19064930	G	A	0	GGGGGCAGCAGGGGAGGGGATCAAAAGGG	GGGGACAGCAGGGGAGGGGATCAAAAGGG	0	1
MYO7A	chr11	76844149	76844177	rs565151710	76844152	G	A	0	GGGGGCACGGGGATGAGAGGGCACCTGGG	GGGGACACGGGGATGAGAGGGCACCTGGG	0	1
D2HGDH	chr2	242706563	242706592	rs568887234	242706569	G	C	0	GGGAGAAGTTGGGGAGATGGGAGCCCCGGG	GGGAGAACTTGGGGAGATGGGAGCCCCGGG	0	1
FIP1L1	chr4	54844552	54844571	rs578210815	54844561	T	C	0	GGGAATGGGATTGGGGTGGG	GGGAATGGGACTGGGGTGGG	0	1
KCNJ5	chr11	128788622	128788644	rs7342168	128788641	G	A	0	GGGGTGGGGCAGCCTGGGACGGG	GGGGTGGGGCAGCCTGGGACAGG	0	1
MITF	chr3	69948482	69948504	rs745937791	69948496	G	A	0	GGGCAGGGGCCAGGGGCCTAGGG	GGGCAGGGGCCAGGGACCTAGGG	0	1
D2HGDH	chr2	242693357	242693383	rs745956213	242693371	G	C	0	GGGGTGTGCCGGGGAGTGCCGGGAGGG	GGGGTGTGCCGGGGACTGCCGGGAGGG	0	1
GLIS2	chr16	4387118	4387146	rs746003129	4387121	G	A	0	GGGGGCAGTGGGGGTGGGGGGGGCATGGG	GGGGACAGTGGGGGTGGGGGGGGCATGGG	0	1
SLC12A3	chr16	56926114	56926140	rs746070183	56926131	C	A	0	GGGGTGGCTAGGGGTGGGCCACTTGGG	GGGGTGGCTAGGGGTGGGACACTTGGG	0	1
FERMT3	chr11	63986840	63986866	rs746756496	63986857	G	A	0	GGGCCTGGGGGCACCAGGGCAGGTGGG	GGGCCTGGGGGCACCAGGACAGGTGGG	0	1
DISC1	chr1	232098592	232098611	rs748063209	232098602	C	A	0	GGGTGGGCGGGCACCATGGG	GGGTGGGCGGGAACCATGGG	0	1
CA2	chr8	86377073	86377092	rs748279376	86377085	G	A	0	GGGGTGGGCCCGGGCCTGGG	GGGGTGGGCCCGGACCTGGG	0	1
SYNE2	chr14	64536684	64536708	rs748635572	64536690	G	A	0	GGGGTGGGCCAGGGGATTCGAGGGG	GGGGTGGACCAGGGGATTCGAGGGG	0	1
SMCHD1	chr18	2723586	2723606	rs748761698	2723600	T	C	0	GGGCTGGGGTGGGAATTGGGG	GGGCTGGGGTGGGAACTGGGG	0	1
CHST3	chr10	73729931	73729949	rs749442548	73729942	C	A	0	GGGCAGGGTGGGCCCCGGG	GGGCAGGGTGGGACCCGGG	0	1
AGRN	chr1	984564	984583	rs749749838	984577	G	A	0	GGGGTGGGGACGGGGCCGGG	GGGGTGGGGACGGGACCGGG	0	1
TG	chr8	134038849	134038876	rs750992533	134038859	G	A	0	GGGGCCTATGGGCTCTGCAGGGTGTGGG	GGGGCCTATGGACTCTGCAGGGTGTGGG	0	1
COL9A3	chr20	61460178	61460207	rs751690905	61460194	G	A	0	GGGGCTCAGGGTGTGACGGGAGGGAGGGGG	GGGGCTCAGGGTGTGACAGGAGGGAGGGGG	0	1
SOX17	chr8	55372210	55372234	rs753414463	55372211	G	A	0	GGGCTCGCCCGGGGCGGGCGGCGGG	GGACTCGCCCGGGGCGGGCGGCGGG	0	1
NDUFS7	chr19	1395088	1395108	rs753536546	1395089	G	A	0	GGGCTGGGGCCGGGGGCCGGG	GGACTGGGGCCGGGGGCCGGG	0	1
LRTOMT	chr11	71808801	71808829	rs753804491	71808804	G	A	0	GGGGGCCAAGGGGGTGGGGTAGAGATGGG	GGGGACCAAGGGGGTGGGGTAGAGATGGG	0	1
GPR126	chr6	142639843	142639871	rs754971517	142639853	G	A	0	GGGGGATCTGGGCAGAGAAGGGAGCAGGG	GGGGGATCTGGACAGAGAAGGGAGCAGGG	0	1
FGD4	chr12	32768571	32768594	rs755746069	32768572	G	A	0	GGGCAGATCGGGGTGGGGTGGGGG	GGACAGATCGGGGTGGGGTGGGGG	0	1
WWOX	chr16	78988587	78988612	rs756212766	78988590	G	C	0	GGGAGTCTAGGGTGAGGGGTGGTGGG	GGGACTCTAGGGTGAGGGGTGGTGGG	0	1
RYR1	chr19	39007847	39007876	rs756552873	39007871	T	C	0	GGGTTGGAGGGTGAGATGGGAAGAATAGGG	GGGTTGGAGGGTGAGATGGGAAGAACAGGG	0	1
PTPRQ	chr12	80913804	80913821	rs756599374	80913812	T	C	0	GGGTGGGGATTGGGGGGG	GGGTGGGGACTGGGGGGG	0	1
DIS3L2	chr2	233207703	233207718	rs756761309	233207708	G	A	0	GGGGGGGCTGGGAGGG	GGGGGGACTGGGAGGG	0	1
AGXT	chr2	241813647	241813671	rs756990545	241813658	G	A	0	GGGAGTGGGGAGGCCGGGCGAGGGG	GGGAGTGGGGAGACCGGGCGAGGGG	0	1
IRX5	chr16	54965382	54965409	rs757679289	54965399	G	A	0	GGGCGAGGGGCAGCAGGGGCCGGGCGGG	GGGCGAGGGGCAGCAGGGACCGGGCGGG	0	1
ARID1B	chr6	157508371	157508394	rs757703563	157508382	G	A	0	GGGAGAAGTGGGGCAGGGGTGGGG	GGGAGAAGTGGGACAGGGGTGGGG	0	1
POU6F2	chr7	39332455	39332483	rs757711316	39332464	G	A	0	GGGTTGGGGGGCTGCAGGGATGGCTGGGG	GGGTTGGGGGACTGCAGGGATGGCTGGGG	0	1
FREM2	chr13	39434343	39434361	rs758189596	39434348	G	A	0	GGGGACGGGAGGGGAAGGG	GGGGACAGGAGGGGAAGGG	0	1
COL18A1	chr21	46929918	46929945	rs758518785	46929935	G	A	0	GGGGCCTGGGTGCAGGGGGCAGCGTGGG	GGGGCCTGGGTGCAGGGGACAGCGTGGG	0	1
CDH23	chr10	73382574	73382594	rs759006640	73382577	T	C	0	GGGATCGGGGTAGGGATTGGG	GGGACCGGGGTAGGGATTGGG	0	1
ARHGAP26	chr5	142380432	142380460	rs759089153	142380434	C	A	0	GGGCCTGTTGGGGGATGGGAGGCAAGGGG	GGGACTGTTGGGGGATGGGAGGCAAGGGG	0	1
PCNT	chr21	47848727	47848749	rs760467265	47848737	G	A	0	GGGCAAGAGGGGCCTGGGTTGGG	GGGCAAGAGGGACCTGGGTTGGG	0	1
PNKD	chr2	219205016	219205044	rs760713205	219205038	G	A	0	GGGGAAGGGGGGTACAGGGCATGGCTGGG	GGGGAAGGGGGGTACAGGGCATGACTGGG	0	1
WWOX	chr16	78809408	78809437	rs760856645	78809430	G	C	0	GGGGGGTGGGGTATCAAGGGAGAGTATGGG	GGGGGGTGGGGTATCAAGGGAGACTATGGG	0	1
CHAT	chr10	50840162	50840189	rs760973150	50840178	G	A	0	GGGTGGCAGGGGAGCGGGCACCTCAGGG	GGGTGGCAGGGGAGCGGACACCTCAGGG	0	1
CHST3	chr10	73734295	73734321	rs761417056	73734318	G	A	0	GGGTCCCTGGGGCAGGGTGGAGACGGG	GGGTCCCTGGGGCAGGGTGGAGACAGG	0	1
DHTKD1	chr10	12111190	12111212	rs761907787	12111198	G	A	0	GGGGATGGGGCCCGGGCGGTGGG	GGGGATGGGACCCGGGCGGTGGG	0	1
VIM	chr10	17272011	17272034	rs762085645	17272012	G	A	0	GGGCCTCGGGAGGGGGCTGGAGGG	GGACCTCGGGAGGGGGCTGGAGGG	0	1
MITF	chr3	69789440	69789469	rs762548485	69789458	G	A	0	GGGCGCGGGAGGGGCCAGGGCAGCGGTGGG	GGGCGCGGGAGGGGCCAGGACAGCGGTGGG	0	1
ZBTB16	chr11	113983145	113983171	rs76289499	113983150	G	A	0	GGGAGAGCAAGGGAGGGATAGAGAGGG	GGGAGAACAAGGGAGGGATAGAGAGGG	0	1
GNAS	chr20	57467274	57467299	rs763405436	57467290	G	A	0	GGGGAGGGGGAGGGGGAGCCCATGGG	GGGGAGGGGGAGGGGGAACCCATGGG	0	1
NAT8L	chr4	2069408	2069436	rs764153174	2069409	G	A	0	GGGCAGGGGGCTGTGTGGGCCCTCGTGGG	GGACAGGGGGCTGTGTGGGCCCTCGTGGG	0	1
SEPT9	chr17	75346311	75346328	rs764738952	75346313	G	A	0	GGGGCAGGGTTGGGCGGG	GGGACAGGGTTGGGCGGG	0	1
CDH23	chr10	73307888	73307914	rs765508876	73307901	G	A	0	GGGGCAGCGGGAGGGCTGGGATTGGGG	GGGGCAGCGGGAGGACTGGGATTGGGG	0	1
IL6R	chr1	154395502	154395521	rs765990721	154395513	G	A	0	GGGGAGGGCTGGGCTATGGG	GGGGAGGGCTGGACTATGGG	0	1
CACNA1D	chr3	53616482	53616509	rs766325692	53616503	G	A	0	GGGGGTATAGGGAGCTGGGCAGGCAGGG	GGGGGTATAGGGAGCTGGGCAGACAGGG	0	1
CHRNB2	chr1	154542880	154542907	rs766328301	154542881	G	A	0	GGGCTCAGGGAGGGAAGGGGTTCTGGGG	GGACTCAGGGAGGGAAGGGGTTCTGGGG	0	1
EPHB2	chr1	23057219	23057240	rs767358911	23057224	G	A	0	GGGAGGGCCAGGGGAGAATGGG	GGGAGGACCAGGGGAGAATGGG	0	1
CACNA1C	chr12	2426650	2426675	rs768128907	2426652	G	A	0	GGGGCTGAAGGGAGTGGGGAATGGGG	GGGACTGAAGGGAGTGGGGAATGGGG	0	1
CAMTA1	chr1	7311464	7311489	rs768920662	7311476	G	A	0	GGGAAAGGGAGACGGGCAGGATGGGG	GGGAAAGGGAGACAGGCAGGATGGGG	0	1
DTNA	chr18	32300724	32300747	rs769085324	32300727	G	C	0	GGGAGCTGGGGATGTGGGGTGGGG	GGGACCTGGGGATGTGGGGTGGGG	0	1
ACO2	chr22	41880080	41880103	rs769797614	41880082	G	A	0	GGGGCAGGGAAATGGGGGGTTGGG	GGGACAGGGAAATGGGGGGTTGGG	0	1
PNPLA2	chr11	824137	824159	rs771558893	824153	G	C	0	GGGCTGGGGGGTCGGGAGAGGGG	GGGCTGGGGGGTCGGGACAGGGG	0	1
MEGF8	chr19	42865862	42865880	rs771916810	42865871	G	A	0	GGGCAGGGACGGGCCTGGG	GGGCAGGGACAGGCCTGGG	0	1
EPHX1	chr1	226016626	226016643	rs773055048	226016627	G	A	0	GGGCCGGGCCGGGCTGGG	GGACCGGGCCGGGCTGGG	0	1
EIF2B5	chr3	184305348	184305372	rs774034967	184305362	G	A	0	GGGGGTGGGGCAGACGGGCAAGGGG	GGGGGTGGGGCAGACAGGCAAGGGG	0	1
IRF8	chr16	85953071	85953095	rs774670490	85953072	G	A	0	GGGCCTGGAAGGGCGGGTGCAGGGG	GGACCTGGAAGGGCGGGTGCAGGGG	0	1
CYLD	chr16	50817815	50817839	rs774872827	50817817	G	A	0	GGGGCATGGGGAGAGGGAAGTGGGG	GGGACATGGGGAGAGGGAAGTGGGG	0	1
MED25	chr19	50340044	50340073	rs775725765	50340045	G	A	0	GGGCCCTCCTGGGCCCAAGGGCCTACTGGG	GGACCCTCCTGGGCCCAAGGGCCTACTGGG	0	1
PAX7	chr1	19003076	19003104	rs776258902	19003081	T	C	0	GGGGGATTGGGGGATCCTGGGAGGCAGGG	GGGGGACTGGGGGATCCTGGGAGGCAGGG	0	1
COL4A2	chr13	111125356	111125384	rs776892850	111125366	G	A	0	GGGCCAGATGGGCCCCCTGGGGAAAGGGG	GGGCCAGATGGACCCCCTGGGGAAAGGGG	0	1
NDUFA13	chr19	19640589	19640616	rs777271289	19640601	G	A	0	GGGGAGTGAGGGGGCTCTCAGGGGTGGG	GGGGAGTGAGGGGACTCTCAGGGGTGGG	0	1
FSCN2	chr17	79503825	79503852	rs777811624	79503835	G	A	0	GGGGCGGGTGGGCACGCGGGAGCGGGGG	GGGGCGGGTGGACACGCGGGAGCGGGGG	0	1
CHRM3	chr1	239783128	239783151	rs778636377	239783131	T	C	0	GGGATTCAGGGTGGGGGTGGAGGG	GGGACTCAGGGTGGGGGTGGAGGG	0	1
CAMTA1	chr1	7619894	7619921	rs780044399	7619898	G	A	0	GGGAGGCCAGGGGAGGGGGGCCTCAGGG	GGGAGACCAGGGGAGGGGGGCCTCAGGG	0	1
CDH3	chr16	68729291	68729316	rs780694031	68729302	G	A	0	GGGGCACTGGGGGCTCTGGGATTGGG	GGGGCACTGGGGACTCTGGGATTGGG	0	1
RAI1	chr17	17585384	17585409	rs780813733	17585391	G	A	0	GGGTGGGGGCATGGGGGCGCGAGGGG	GGGTGGGGACATGGGGGCGCGAGGGG	0	1
SMAD6	chr15	67013106	67013126	rs781130077	67013112	G	A	0	GGGCAGGGCCCTCAGGGTGGG	GGGCAGGACCCTCAGGGTGGG	0	1
ATP6V1B1	chr2	71188410	71188437	rs782748327	71188423	G	A	0	GGGAGGCCTGGGAGGCCAGGGAGGTGGG	GGGAGGCCTGGGAGACCAGGGAGGTGGG	0	1
PGAP2	chr11	3845725	3845748	rs78741077	3845741	G	A	0	GGGGTGCTGGGGTTGGGGCTGGGG	GGGGTGCTGGGGTTGGGACTGGGG	0	1
MSH2	chr2	47636209	47636233	rs866300291	47636226	G	A	0	GGGGAGGGGAGGGGGAGGGCCAGGG	GGGGAGGGGAGGGGGAGGACCAGGG	0	1
D2HGDH	chr2	242706463	242706492	rs866723075	242706469	G	C	0	GGGAGAAGTTGGGGAGATGGGAGCCCCGGG	GGGAGAACTTGGGGAGATGGGAGCCCCGGG	0	1
D2HGDH	chr2	242706513	242706542	rs866736131	242706519	G	C	0	GGGAGAAGTTGGGGAGATGGGAGCCCCGGG	GGGAGAACTTGGGGAGATGGGAGCCCCGGG	0	1
D2HGDH	chr2	242704963	242704992	rs866834913	242704969	G	C	0	GGGAGAAGTTGGGGAGATGGGAGCCCCGGG	GGGAGAACTTGGGGAGATGGGAGCCCCGGG	0	1
ATP8A2	chr13	25946450	25946473	rs867481030	25946459	G	A	0	GGGAGGGTGGGCCCGGGGCGGGGG	GGGAGGGTGGACCCGGGGCGGGGG	0	1
D2HGDH	chr2	242706613	242706642	rs867957503	242706619	G	C	0	GGGAGAAGTTGGGGAGATGGGAGCCCCGGG	GGGAGAACTTGGGGAGATGGGAGCCCCGGG	0	1
D2HGDH	chr2	242706763	242706792	rs868059587	242706769	G	C	0	GGGAGAAGTTGGGGAGATGGGAGCCCCGGG	GGGAGAACTTGGGGAGATGGGAGCCCCGGG	0	1
D2HGDH	chr2	242706663	242706692	rs868180872	242706669	G	C	0	GGGAGAAGTTGGGGAGATGGGAGCCCCGGG	GGGAGAACTTGGGGAGATGGGAGCCCCGGG	0	1
EPB41	chr1	29213761	29213779	rs868863768	29213769	G	A	0	GGGAGGGACGGGGTTAGGG	GGGAGGGACAGGGTTAGGG	0	1
CHST14	chr15	40763483	40763510	rs886042864	40763485	C	A	0	GGGCCCCTCTGGGCAGGGCCCGGGCGGG	GGGACCCTCTGGGCAGGGCCCGGGCGGG	0	1
SEPT9	chr17	75418601	75418629	rs889534474	75418621	G	A	0	GGGAAGCTGGGGTAAGAGCGGGCTGGGGG	GGGAAGCTGGGGTAAGAGCGGACTGGGGG	0	1
ROBO2	chr3	76600010	76600036	rs890417483	76600028	G	C	0	GGGAGGGATCCCTGGGGGAGCTGAGGG	GGGAGGGATCCCTGGGGGACCTGAGGG	0	1
TG	chr8	133945713	133945737	rs890811343	133945729	G	A	0	GGGCATGTGGGGCAGGGGCAGGGGG	GGGCATGTGGGGCAGGGACAGGGGG	0	1
CAPN10	chr2	241537025	241537055	rs891167466	241537049	G	A	0	GGGCCAGTGGGAGCCCTTGGGGCGGGCTGGG	GGGCCAGTGGGAGCCCTTGGGGCGGACTGGG	0	1
CEP164	chr11	117198893	117198916	rs893199089	117198902	G	A	0	GGGCCACCGGGCCCGGGCTGGGGG	GGGCCACCGGACCCGGGCTGGGGG	0	1
SAG	chr2	234221812	234221840	rs894402752	234221822	G	A	0	GGGGGTGCTGGGCAAAGGGAGAGATGGGG	GGGGGTGCTGGACAAAGGGAGAGATGGGG	0	1
SGCD	chr5	155738627	155738651	rs896683604	155738645	G	A	0	GGGAGGAGCTGGGGTTAGGGCAGGG	GGGAGGAGCTGGGGTTAGGACAGGG	0	1
NFIX	chr19	13143836	13143857	rs897338507	13143847	G	A	0	GGGTGAGGGGGGGCTCACAGGG	GGGTGAGGGGGGACTCACAGGG	0	1
TPCN2	chr11	68851192	68851223	rs897501549	68851218	G	C	0	GGGGTGCGAGGGTGTGTATGGGTGGACGTGGG	GGGGTGCGAGGGTGTGTATGGGTGGACCTGGG	0	1
STK11	chr19	1228108	1228139	rs898438996	1228120	G	A	0	GGGGTGTTTGGGAGCTGCTGGGTGGCAGGGGG	GGGGTGTTTGGGAACTGCTGGGTGGCAGGGGG	0	1
MUC5B	chr11	1259864	1259887	rs902587372	1259873	G	A	0	GGGCAGATGGGCAGGTGGGCAGGG	GGGCAGATGGACAGGTGGGCAGGG	0	1
ITGB3	chr17	45353780	45353804	rs905711165	45353796	G	A	0	GGGCAGGCCTGGGGAGGGCAGAGGG	GGGCAGGCCTGGGGAGGACAGAGGG	0	1
SLC2A10	chr20	45342441	45342462	rs907586276	45342455	G	A	0	GGGTGTCAGGGCAGGGCTGGGG	GGGTGTCAGGGCAGGACTGGGG	0	1
AMPD3	chr11	10359252	10359273	rs908220659	10359261	G	C	0	GGGGTGGGGAGAGGTGGGAGGG	GGGGTGGGGACAGGTGGGAGGG	0	1
SEMA4A	chr1	156138681	156138706	rs908676851	156138696	G	C	0	GGGAGCCACAGGGGAAGAGGGTTGGG	GGGAGCCACAGGGGAACAGGGTTGGG	0	1
INF2	chr14	105172516	105172540	rs908819079	105172524	G	A	0	GGGCTGGGGGCTGCAGGGCGGAGGG	GGGCTGGGGACTGCAGGGCGGAGGG	0	1
JAM3	chr11	133979582	133979611	rs908912026	133979606	G	C	0	GGGAAAAAGTGGGCTGGAGGGGAAAGAGGG	GGGAAAAAGTGGGCTGGAGGGGAAACAGGG	0	1
TSC2	chr16	2128200	2128220	rs909084219	2128207	G	A	0	GGGCATGGGCATGGGCCTGGG	GGGCATGGACATGGGCCTGGG	0	1
MSX2	chr5	174152079	174152104	rs909786769	174152092	G	C	0	GGGTACTGGAGGGAGCGGGGGGCGGG	GGGTACTGGAGGGACCGGGGGGCGGG	0	1
GATA4	chr8	11583351	11583375	rs915201447	11583365	G	A	0	GGGAAAGGGGCCTGGGCCCGGGGGG	GGGAAAGGGGCCTGGACCCGGGGGG	0	1
CD81	chr11	2414041	2414065	rs916879528	2414054	G	A	0	GGGGTGGGGCTGGGGCCTGGCAGGG	GGGGTGGGGCTGGGACCTGGCAGGG	0	1
COL4A2	chr13	111125356	111125384	rs917075881	111125357	G	A	0	GGGCCAGATGGGCCCCCTGGGGAAAGGGG	GGACCAGATGGGCCCCCTGGGGAAAGGGG	0	1
LAMA3	chr18	21359561	21359584	rs924480335	21359573	G	A	0	GGGGTGGGTGGGGGCAGTGGTGGG	GGGGTGGGTGGGGACAGTGGTGGG	0	1
FOXN1	chr17	26833503	26833527	rs925126218	26833509	G	A	0	GGGCCGGGCTGGGGCACGGGGAGGG	GGGCCGGACTGGGGCACGGGGAGGG	0	1
RET	chr10	43591109	43591130	rs929215937	43591121	G	A	0	GGGCAGGGTGGGAGCAGATGGG	GGGCAGGGTGGGAACAGATGGG	0	1
HMGA2	chr12	66338868	66338893	rs930983160	66338879	G	A	0	GGGGCCTCAGGGGCATCCTGGGAGGG	GGGGCCTCAGGGACATCCTGGGAGGG	0	1
IL21R	chr16	27417470	27417500	rs931395537	27417472	C	A	0	GGGCCAGGGCGGGCTGATGGGGGCTGCTGGG	GGGACAGGGCGGGCTGATGGGGGCTGCTGGG	0	1
GPC6	chr13	93896257	93896283	rs931811786	93896271	G	C	0	GGGTGGAGGGGAAAAGCTGGGTGGGGG	GGGTGGAGGGGAAAACCTGGGTGGGGG	0	1
AGK	chr7	141321372	141321396	rs932522307	141321381	G	C	0	GGGAGGGAGAGAGGGAAGGAGGGGG	GGGAGGGAGACAGGGAAGGAGGGGG	0	1
PACRG	chr6	163197959	163197985	rs934606467	163197970	G	A	0	GGGGAAAGGGTGGCAGGGGGATGAGGG	GGGGAAAGGGTGACAGGGGGATGAGGG	0	1
BCAM	chr19	45314184	45314208	rs936369098	45314201	G	A	0	GGGTCTGAGGGAGGAGGGGCTGGGG	GGGTCTGAGGGAGGAGGGACTGGGG	0	1
ACVR2B	chr3	38498192	38498213	rs937236233	38498204	G	A	0	GGGGTGGGGTGGGGCAAGGGGG	GGGGTGGGGTGGGACAAGGGGG	0	1
MC1R	chr16	89985498	89985524	rs939976616	89985513	G	A	0	GGGAGAGGGTGTGAGGGCAGATCTGGG	GGGAGAGGGTGTGAGGACAGATCTGGG	0	1
EIF2B5	chr3	184008273	184008293	rs941915702	184008274	G	A	0	GGGCAGGGCTGTTGGGAGGGG	GGACAGGGCTGTTGGGAGGGG	0	1
DPP10	chr2	115460569	115460593	rs943188667	115460574	G	A	0	GGGTGAGCAGGGTGGGAAGAAGGGG	GGGTGAACAGGGTGGGAAGAAGGGG	0	1
EIF2B5	chr3	184080764	184080788	rs943241268	184080772	C	G	0	GGGGCTGGGCACCTCTGGGGCGGGG	GGGGCTGGGGACCTCTGGGGCGGGG	0	1
GATA4	chr8	11562550	11562580	rs943634464	11562551	G	A	0	GGGCTCAGGGGTCACCGTGGGCAGAGGGGGG	GGACTCAGGGGTCACCGTGGGCAGAGGGGGG	0	1
TRIOBP	chr22	38142822	38142841	rs944455757	38142829	G	A	0	GGGCCTGGGCTGGGGAGGGG	GGGCCTGGACTGGGGAGGGG	0	1
VPS13B	chr8	100622805	100622833	rs944620743	100622825	G	A	0	GGGCCTGTCAGGGGGTGGGGGGCTAGGGG	GGGCCTGTCAGGGGGTGGGGGACTAGGGG	0	1
CAMTA1	chr1	7576459	7576489	rs945718900	7576460	G	A	0	GGGCCGTGGAGGGCAGCTGGGGCAGCCAGGG	GGACCGTGGAGGGCAGCTGGGGCAGCCAGGG	0	1
GPR126	chr6	142639843	142639871	rs948571840	142639865	G	A	0	GGGGGATCTGGGCAGAGAAGGGAGCAGGG	GGGGGATCTGGGCAGAGAAGGGAACAGGG	0	1
FLNC	chr7	128473917	128473947	rs948780184	128473930	G	A	0	GGGGAAGGGGGTGGGCTGGGGAGCTGCTGGG	GGGGAAGGGGGTGGACTGGGGAGCTGCTGGG	0	1
LDLRAP1	chr1	25887984	25888004	rs956355565	25887991	G	A	0	GGGGGAGGGCAGGGAGCGGGG	GGGGGAGGACAGGGAGCGGGG	0	1
PCCB	chr3	135970285	135970309	rs957889405	135970289	G	A	0	GGGAGGCACTGGGGGAGGGATGGGG	GGGAGACACTGGGGGAGGGATGGGG	0	1
NAT8L	chr4	2070532	2070553	rs958209706	2070547	C	A	0	GGGCCTGGGTGGAGGGCCTGGG	GGGCCTGGGTGGAGGGACTGGG	0	1
RSPH9	chr6	43613144	43613168	rs958345658	43613152	C	A	0	GGGGCGGGGCCCATGGGGCCAAGGG	GGGGCGGGGACCATGGGGCCAAGGG	0	1
EPHX1	chr1	226028059	226028087	rs962283493	226028077	G	A	0	GGGAGTGGGCAGCTCTGGGGCTGCAGGGG	GGGAGTGGGCAGCTCTGGGACTGCAGGGG	0	1
CDH15	chr16	89243868	89243896	rs962792105	89243880	C	A	0	GGGTGGGAGGGGGCCTCCAGGGAGGAGGG	GGGTGGGAGGGGGACTCCAGGGAGGAGGG	0	1
DAGLA	chr11	61477474	61477500	rs963235586	61477475	G	A	0	GGGCTCAGGGTAGGCTGGGCAAGGGGG	GGACTCAGGGTAGGCTGGGCAAGGGGG	0	1
RTEL1	chr20	62311950	62311970	rs964205355	62311951	G	A	0	GGGCCGGGGCTGGGGTCGGGG	GGACCGGGGCTGGGGTCGGGG	0	1
GOSR2	chr17	45049365	45049393	rs964854668	45049373	G	A	0	GGGCACAGGGCACGTGGGGGAGAGGGGGG	GGGCACAGGACACGTGGGGGAGAGGGGGG	0	1
MESP2	chr15	90320146	90320167	rs965698492	90320154	G	A	0	GGGGCAGGGGCAAGGGCAGGGG	GGGGCAGGGACAAGGGCAGGGG	0	1
VPS13B	chr8	100025599	100025618	rs965917617	100025615	G	C	0	GGGAGCGGGAGCGGGACGGG	GGGAGCGGGAGCGGGACCGG	0	1
PSEN2	chr1	227081065	227081089	rs966897849	227081075	G	A	0	GGGCTGGAAGGGCAGGGGAGGTGGG	GGGCTGGAAGGACAGGGGAGGTGGG	0	1
RPS19	chr19	42375712	42375737	rs968368520	42375732	T	C	0	GGGTGAGGGGGCCCAGGGTGATTGGG	GGGTGAGGGGGCCCAGGGTGACTGGG	0	1
DYSF	chr2	71803819	71803845	rs969701408	71803832	G	A	0	GGGGAGCCGAGGGGGCCGGGAGTGGGG	GGGGAGCCGAGGGGACCGGGAGTGGGG	0	1
TEAD1	chr11	12889370	12889391	rs970030086	12889382	G	A	0	GGGTGGGTGGGGAGCAGAGGGG	GGGTGGGTGGGGAACAGAGGGG	0	1
SH3BP2	chr4	2801881	2801907	rs973622124	2801883	G	A	0	GGGGCTACAGGGGATGAAAGGGGAGGG	GGGACTACAGGGGATGAAAGGGGAGGG	0	1
NFIX	chr19	13185412	13185434	rs973953641	13185419	G	A	0	GGGGGAGGGCCTGGAGGGTGGGG	GGGGGAGGACCTGGAGGGTGGGG	0	1
RET	chr10	43578280	43578300	rs974219805	43578291	G	A	0	GGGTGCCGGGACGAGGGTGGG	GGGTGCCGGGACAAGGGTGGG	0	1
D2HGDH	chr2	242704673	242704699	rs976859447	242704684	G	C	0	GGGGAGATGGGAGCCCCGGGCTGAGGG	GGGGAGATGGGACCCCCGGGCTGAGGG	0	1
INF2	chr14	105176577	105176598	rs977985772	105176587	G	A	0	GGGGCGGGAGGGCTGCTCGGGG	GGGGCGGGAGGACTGCTCGGGG	0	1
TBXAS1	chr7	139477648	139477674	rs978586305	139477666	G	A	0	GGGGGGCTCGGGGCTCGGGGCTCGGGG	GGGGGGCTCGGGGCTCGGGACTCGGGG	0	1
FSCN2	chr17	79501840	79501871	rs978865088	79501860	G	A	0	GGGGTGTGGAGGGAGGTCAGGGCTCCCTTGGG	GGGGTGTGGAGGGAGGTCAGGACTCCCTTGGG	0	1
EIF2B5	chr3	184185859	184185875	rs979916131	184185864	G	A	0	GGGAGGGCAGGGATGGG	GGGAGGACAGGGATGGG	0	1
ARHGEF10	chr8	1789753	1789776	rs983939139	1789770	G	A	0	GGGGGCAGGGAGTAGGGAGCAGGG	GGGGGCAGGGAGTAGGGAACAGGG	0	1
DYSF	chr2	71762258	71762285	rs985158828	71762260	G	A	0	GGGGCTCTGGGCTTCGGGAGGTCCAGGG	GGGACTCTGGGCTTCGGGAGGTCCAGGG	0	1
KCNQ1	chr11	2862058	2862079	rs985382629	2862069	G	A	0	GGGAGGGAGTGGGCTTGGGGGG	GGGAGGGAGTGGACTTGGGGGG	0	1
CLN8	chr8	1712118	1712141	rs985668963	1712135	G	A	0	GGGGTGCCCGGGTTAGGGGCCGGG	GGGGTGCCCGGGTTAGGGACCGGG	0	1
COG1	chr17	71195208	71195229	rs985694527	71195210	G	A	0	GGGGCCTTGGGAGGGCCCTGGG	GGGACCTTGGGAGGGCCCTGGG	0	1
MIB1	chr18	19376344	19376370	rs988395888	19376362	G	A	0	GGGCCTGTCAGGGTGGGGGGCAAGGGG	GGGCCTGTCAGGGTGGGGGACAAGGGG	0	1
AP4E1	chr15	51249630	51249655	rs989989990	51249632	G	A	0	GGGGCAGGGCAGGGCAGGGCCATGGG	GGGACAGGGCAGGGCAGGGCCATGGG	0	1
RUNX2	chr6	45391569	45391597	rs992454161	45391589	G	C	0	GGGAGGCGCGGGCCAGGGGACGGGGCGGG	GGGAGGCGCGGGCCAGGGGACCGGGCGGG	0	1
PAX7	chr1	19066304	19066328	rs993951371	19066321	C	A	0	GGGGAGTGGGGGCAGGGGCCCAGGG	GGGGAGTGGGGGCAGGGGACCAGGG	0	1
HMOX1	chr22	35777198	35777219	rs995443514	35777209	G	A	0	GGGGCGCGGGACGCGGGACGGG	GGGGCGCGGGACACGGGACGGG	0	1
SUGCT	chr7	40226885	40226906	rs996106922	40226896	G	C	0	GGGGTGTGGGGAGTGGGGAGGG	GGGGTGTGGGGACTGGGGAGGG	0	1
ACSF3	chr16	89204106	89204134	rs996723229	89204126	G	C	0	GGGAAGGATGGGGAGAGGGGAGTGGGGGG	GGGAAGGATGGGGAGAGGGGACTGGGGGG	0	1
TSC2	chr16	2103554	2103579	rs996737006	2103555	G	A	0	GGGCACAGGGTCTAGGGGCTGATGGG	GGACACAGGGTCTAGGGGCTGATGGG	0	1
KCNK3	chr2	26943416	26943440	rs997030114	26943430	G	A	0	GGGTGGGGGATGGGGGCTTTGGGGG	GGGTGGGGGATGGGGACTTTGGGGG	0	1
COL6A1	chr21	47421088	47421113	rs952933052	47421090	G	A	3.19e-05	GGGGCCAGGGCGGTGGAGGGGAGGGG	GGGACCAGGGCGGTGGAGGGGAGGGG	0	1
PAX9	chr14	37131359	37131387	rs1237245006	37131378	G	C	3.2e-05	GGGAGGGAGGGAGGGAGGGAGCGCGAGGG	GGGAGGGAGGGAGGGAGGGACCGCGAGGG	0	1
LIPC	chr15	58737289	58737316	rs201384114	58737308	G	A	0.00010353	GGGTGGGATGGGGAGTGGGGGCTCAGGG	GGGTGGGATGGGGAGTGGGGACTCAGGG	0	1
BAG3	chr10	121411424	121411446	rs543356821	121411437	G	A	0.00010353	GGGGAGTGGGCTGGGCCGGGGGG	GGGGAGTGGGCTGGACCGGGGGG	0	1
DTNA	chr18	32258687	32258711	rs943691798	32258702	G	A	0.00010353	GGGTCAGGGATCTTGGGCATTGGGG	GGGTCAGGGATCTTGGACATTGGGG	0	1
CD79A	chr19	42383557	42383578	rs782252374	42383571	G	A	0.000104959	GGGAGGGCAAGAGGGGCCAGGG	GGGAGGGCAAGAGGGACCAGGG	0	1
ZEB1	chr10	31608258	31608288	rs200356122	31608268	G	A	0.00010791	GGGGGAGCTGGGCAGCCGGGGCGCCCCCGGG	GGGGGAGCTGGACAGCCGGGGCGCCCCCGGG	0	1
EIF2B5	chr3	184103963	184103986	rs776117866	184103973	G	A	0.00011027	GGGCAGTGGGGGCAGTGGGGAGGG	GGGCAGTGGGGACAGTGGGGAGGG	0	1
EPHB2	chr1	23186966	23186994	rs1002673572	23186987	C	A	0.000111493	GGGCGGCTTAGGGCAGGGGCAGCCTGGGG	GGGCGGCTTAGGGCAGGGGCAGACTGGGG	0	1
AGRN	chr1	969393	969422	rs1055178779	969398	G	T	0.000111493	GGGGACGAGGGGAGCTGGAGGGAGCCCGGG	GGGGACTAGGGGAGCTGGAGGGAGCCCGGG	0	1
ARHGEF10	chr8	1893826	1893847	rs200452240	1893836	G	A	0.000111493	GGGGACGGGACGGGGCCCAGGG	GGGGACGGGACAGGGCCCAGGG	0	1
COX6B1	chr19	36145591	36145615	rs371502710	36145592	G	A	0.000111493	GGGCCCTTGGGATGCTGGGGTGGGG	GGACCCTTGGGATGCTGGGGTGGGG	0	1
CACNA1H	chr16	1256042	1256064	rs971482580	1256046	G	A	0.000111493	GGGACGAGGGCCTGGGGTCAGGG	GGGACAAGGGCCTGGGGTCAGGG	0	1
HEATR2	chr7	817497	817517	rs984084418	817501	G	A	0.000111493	GGGACGGGGAGGGACGCGGGG	GGGACAGGGAGGGACGCGGGG	0	1
ATP2C1	chr3	130613163	130613186	rs940799158	130613164	G	A	0.000119457	GGGCTGTCCGGGGCTTTGGGTGGG	GGACTGTCCGGGGCTTTGGGTGGG	0	1
FKRP	chr19	47269733	47269760	rs1248983281	47269740	T	C	0.000119856	GGGTAGAATAGGGTATGGGTTGGGTGGG	GGGTAGAACAGGGTATGGGTTGGGTGGG	0	1
MED25	chr19	50339016	50339046	rs767338688	50339037	G	A	0.000121794	GGGTACCGTAGGGGCCTCTGGGGCCACGGGG	GGGTACCGTAGGGGCCTCTGGGACCACGGGG	0	1
POFUT1	chr20	30811616	30811640	rs1042656448	30811625	G	C	0.000127405	GGGTGGGGGAGATGGGAGTAAGGGG	GGGTGGGGGACATGGGAGTAAGGGG	0	1
PCNT	chr21	47848234	47848258	rs1416665810	47848239	G	A	0.000127405	GGGCGGGCAGCAGGGAAGGCCGGGG	GGGCGGACAGCAGGGAAGGCCGGGG	0	1
ARHGAP26	chr5	142250377	142250399	rs370277263	142250391	G	A	0.000127413	GGGATTGGGGTGGGGGCAAGGGG	GGGATTGGGGTGGGGACAAGGGG	0	1
EGFR	chr7	55142801	55142824	rs544244335	55142802	G	A	0.000127421	GGGCAGCCAGGGCCAGGGCAGGGG	GGACAGCCAGGGCCAGGGCAGGGG	0	1
PLCG2	chr16	81872204	81872231	rs891301611	81872223	G	A	0.000127421	GGGCCTGTCAGGGGGTGGGGGCAAGGGG	GGGCCTGTCAGGGGGTGGGGACAAGGGG	0	1
DCC	chr18	50569672	50569701	rs995061721	50569674	G	A	0.000127421	GGGGCCTGCTGGGGGTTGGGGGGCAAGGGG	GGGACCTGCTGGGGGTTGGGGGGCAAGGGG	0	1
VPS13B	chr8	100281018	100281038	rs964081973	100281031	G	A	0.000127445	GGGATTTTGGGGGGGCCAGGG	GGGATTTTGGGGGGACCAGGG	0	1
PDGFRL	chr8	17462095	17462116	rs1026736299	17462111	G	C	0.00012747	GGGGTGGGGGGATGGGAGAGGG	GGGGTGGGGGGATGGGACAGGG	0	1
SLC35C1	chr11	45832193	45832219	rs553644074	45832211	G	A	0.000127502	GGGAGGCCTGGGGAGGAACGGGGAGGG	GGGAGGCCTGGGGAGGAACAGGGAGGG	0	1
APOE	chr19	45409780	45409808	rs1332317512	45409797	G	A	0.00012751	GGGTGAGGCCGGGTTGGGGCCGGGCTGGG	GGGTGAGGCCGGGTTGGGACCGGGCTGGG	0	1
TTC7A	chr2	47167874	47167894	rs1037393778	47167885	G	C	0.000127518	GGGCCTGGGAACGGGCCTGGG	GGGCCTGGGAACCGGCCTGGG	0	1
JPH3	chr16	87725493	87725519	rs890669481	87725516	G	A	0.000127518	GGGCAGGGTGGGAGGTGTAGGGACGGG	GGGCAGGGTGGGAGGTGTAGGGACAGG	0	1
UCHL1	chr4	41259263	41259282	rs1051039320	41259264	G	A	0.000127559	GGGCTGGGGCGTGGGCTGGG	GGACTGGGGCGTGGGCTGGG	0	1
MAPK8IP1	chr11	45922829	45922854	rs529662987	45922830	G	A	0.000127673	GGGCATTGTGGGGAGGGGTCCCAGGG	GGACATTGTGGGGAGGGGTCCCAGGG	0	1
PAX7	chr1	19057384	19057414	rs1042997213	19057387	G	C	0.000128131	GGGAGAGGAAGGGGTTGGGGGTGGGGTAGGG	GGGACAGGAAGGGGTTGGGGGTGGGGTAGGG	0	1
FGD4	chr12	32716977	32716998	rs971241741	32716980	G	C	0.000130847	GGGAGAGGGAGTGGGAGAGGGG	GGGACAGGGAGTGGGAGAGGGG	0	1
CACNB2	chr10	18608366	18608394	rs1038390081	18608367	G	A	0.000135385	GGGCCTCTCAGGGGGTGGGGGGCAAGGGG	GGACCTCTCAGGGGGTGGGGGGCAAGGGG	0	1
RYR2	chr1	237269359	237269380	rs1043438718	237269361	G	A	0.000135385	GGGGCTGCGGGTGTGGGCCGGG	GGGACTGCGGGTGTGGGCCGGG	0	1
SLCO1B3	chr12	21110009	21110038	rs892464575	21110012	C	A	0.000135385	GGGGCCTGTTGGGGGGTGAGGGGCTAGGGG	GGGGACTGTTGGGGGGTGAGGGGCTAGGGG	0	1
RTEL1	chr20	62319420	62319446	rs202032186	62319421	G	A	0.000140597	GGGCCCTGCTGGGGTGGGAGGTGGGGG	GGACCCTGCTGGGGTGGGAGGTGGGGG	0	1
DYSF	chr2	71847784	71847811	rs1018826319	71847786	G	A	0.000141519	GGGGCTGGGGGTAGGGGGGTTAGGAGGG	GGGACTGGGGGTAGGGGGGTTAGGAGGG	0	1
RNF213	chr17	78236608	78236630	rs113614977	78236618	G	A	0.000143349	GGGAGGAGAGGGCAGGGCCAGGG	GGGAGGAGAGGACAGGGCCAGGG	0	1
SMARCAL1	chr2	217286677	217286704	rs570449484	217286684	G	A	0.000143349	GGGCAGACGGGTGAGCAGGGCACAGGGG	GGGCAGACAGGTGAGCAGGGCACAGGGG	0	1
TNNI2	chr11	1860336	1860361	rs901854924	1860352	G	A	0.000143349	GGGGCGGGGGTCTGGGGGCCTGGGGG	GGGGCGGGGGTCTGGGGACCTGGGGG	0	1
UBIAD1	chr1	11353602	11353624	rs372788007	11353613	G	A	0.000151312	GGGAAGGGCTGGGCCCTCCAGGG	GGGAAGGGCTGGACCCTCCAGGG	0	1
EGFR	chr7	55249179	55249201	rs199585163	55249189	T	C	0.000153775	GGGAAGGGAGATACGGGGAGGGG	GGGAAGGGAGACACGGGGAGGGG	0	1
TUBA8	chr22	18607084	18607101	rs201695444	18607094	G	A	0.000153775	GGGCAGGGGACGGGTGGG	GGGCAGGGGACAGGTGGG	0	1
SORL1	chr11	121475050	121475077	rs373109464	121475066	G	A	0.000153846	GGGCTGGGCTGGGCTGGGCTGGGCTGGG	GGGCTGGGCTGGGCTGGACTGGGCTGGG	0	1
FKRP	chr19	47249346	47249378	rs777788662	47249362	G	A	0.000155376	GGGTGAGGCCGGGCCGGGCCGGGCCGGGTTGGG	GGGTGAGGCCGGGCCGGACCGGGCCGGGTTGGG	0	1
RNF213	chr17	78234755	78234779	rs919107729	78234773	G	A	0.000159276	GGGCCCCGCGGGCCGGCGGGCCGGG	GGGCCCCGCGGGCCGGCGGACCGGG	0	1
MAPK8IP1	chr11	45927485	45927516	rs533322078	45927507	T	C	0.000159297	GGGCAGAGTGGGCTGCCTGGGGATTGGGAGGG	GGGCAGAGTGGGCTGCCTGGGGACTGGGAGGG	0	1
ING1	chr13	111368228	111368251	rs762395372	111368229	G	A	0.000159459	GGGCCTGTGGGCTCGGGGCCGGGG	GGACCTGTGGGCTCGGGGCCGGGG	0	1
BMP1	chr8	22064278	22064297	rs1458518687	22064283	G	A	0.000159551	GGGGGGGCAGGAGGGAAGGG	GGGGGGACAGGAGGGAAGGG	0	1
DPP6	chr7	153748508	153748537	rs941940533	153748523	G	A	0.000162909	GGGAGCCGGGGAGGACGCGGGAGGGCCGGG	GGGAGCCGGGGAGGACACGGGAGGGCCGGG	0	1
DNAI2	chr17	72310926	72310942	rs998823799	72310935	G	A	0.00016724	GGGAGGGGACGGGCGGG	GGGAGGGGACAGGCGGG	0	1
BFSP2	chr3	133144821	133144848	rs542877521	133144842	G	A	0.000169779	GGGGAAGGCAGGGCAGGGCAGGGCAGGG	GGGGAAGGCAGGGCAGGGCAGGACAGGG	0	1
UVSSA	chr4	1370923	1370948	rs572729825	1370928	G	A	0.000175204	GGGGGGGCAGGGGAGCCGGGCAAGGG	GGGGGGACAGGGGAGCCGGGCAAGGG	0	1
ITPR1	chr3	4609228	4609258	rs893808433	4609248	T	A	0.000183168	GGGCTTGGGGGCTGAGGTGGGTCATGGAGGG	GGGCTTGGGGGCTGAGGTGGGACATGGAGGG	0	1
EPHA3	chr3	89312871	89312891	rs948129620	89312883	G	A	0.000183168	GGGAGTGGGGTGGGCCATGGG	GGGAGTGGGGTGGACCATGGG	0	1
CACNA1D	chr3	53619749	53619770	rs111734686	53619756	G	A	0.000191131	GGGGAGGGGCTATTGGGAGGGG	GGGGAGGGACTATTGGGAGGGG	0	1
KLHL40	chr3	42731530	42731553	rs538290113	42731533	T	C	0.000191131	GGGATTGGGTAGGGAAAGTGAGGG	GGGACTGGGTAGGGAAAGTGAGGG	0	1
AANAT	chr17	74462489	74462514	rs530916143	74462510	G	A	0.000191205	GGGTGGGCGGGGGCATCGGGACGGGG	GGGTGGGCGGGGGCATCGGGACAGGG	0	1
GLI2	chr2	121661535	121661560	rs1052915583	121661541	T	C	0.00019151	GGGGAGATTGGGGAGGGGCAGGTGGG	GGGGAGACTGGGGAGGGGCAGGTGGG	0	1
NFIX	chr19	13139583	13139604	rs28588598	13139587	G	A	0.000191571	GGGACGGGTGAGCTGGGGAGGG	GGGACAGGTGAGCTGGGGAGGG	0	1
MESP2	chr15	90320146	90320167	rs767474985	90320148	G	A	0.000194515	GGGGCAGGGGCAAGGGCAGGGG	GGGACAGGGGCAAGGGCAGGGG	0	1
ITGA3	chr17	48148586	48148612	rs896948038	48148587	G	A	0.000199095	GGGCAAGAGAGGGAATAGGGAGATGGG	GGACAAGAGAGGGAATAGGGAGATGGG	0	1
EGFR	chr7	55247300	55247324	rs140036996	55247304	G	A	0.000199681	GGGACGGCCAGGGCAGGGTTTAGGG	GGGACAGCCAGGGCAGGGTTTAGGG	0	1
SLC29A3	chr10	73102353	73102379	rs145618641	73102371	G	A	0.000199681	GGGCCTCACCGGGGCTTGGGCTGGGGG	GGGCCTCACCGGGGCTTGGACTGGGGG	0	1
NTRK1	chr1	156808895	156808913	rs183693031	156808896	G	A	0.000199681	GGGCAGGGGAGGGGTGGGG	GGACAGGGGAGGGGTGGGG	0	1
PPOX	chr1	161146246	161146278	rs185263519	161146249	T	C	0.000199681	GGGATCATGGGGGCTCCAGGGGGTCCCGGGGGG	GGGACCATGGGGGCTCCAGGGGGTCCCGGGGGG	0	1
PSTPIP1	chr15	77305738	77305762	rs189523620	77305740	T	A	0.000199681	GGGTCTCCATGGGGGGGTGGTGGGG	GGGACTCCATGGGGGGGTGGTGGGG	0	1
ESRRB	chr14	76864924	76864946	rs189833121	76864930	G	A	0.000199681	GGGTAGGGCTGTGGGGGAAGGGG	GGGTAGGACTGTGGGGGAAGGGG	0	1
SCNN1B	chr16	23289875	23289900	rs191520133	23289890	G	A	0.000199681	GGGGGTAGTGGGAGACGGGAGGGGGG	GGGGGTAGTGGGAGACAGGAGGGGGG	0	1
AQP1	chr7	30900141	30900160	rs192567109	30900148	G	A	0.000199681	GGGCTGACGGGTTGGGTGGG	GGGCTGACAGGTTGGGTGGG	0	1
CTSA	chr20	44523575	44523596	rs201506811	44523578	G	A	0.000199681	GGGGGCAGGGGGAGGGGCAGGG	GGGGACAGGGGGAGGGGCAGGG	0	1
AQP1	chr7	30893557	30893584	rs372605473	30893562	G	A	0.000199681	GGGGTGGCAGGGCTGCTCTGGGTGGGGG	GGGGTGACAGGGCTGCTCTGGGTGGGGG	0	1
EPHX1	chr1	226016696	226016716	rs527580828	226016705	G	A	0.000199681	GGGAGGGGACGGGGGCTTGGG	GGGAGGGGACAGGGGCTTGGG	0	1
WBSCR22	chr7	73117355	73117379	rs527974822	73117369	G	A	0.000199681	GGGGCAGGGCAGAGGGCCGAGGGGG	GGGGCAGGGCAGAGGACCGAGGGGG	0	1
CHST3	chr10	73739640	73739670	rs528168038	73739653	G	A	0.000199681	GGGTGGGAGTGGGAGCATGGGGGCTGGAGGG	GGGTGGGAGTGGGAACATGGGGGCTGGAGGG	0	1
NOS1AP	chr1	162179558	162179582	rs528294707	162179568	G	A	0.000199681	GGGGGCGGGGGGCAAGGGCAGGGGG	GGGGGCGGGGGACAAGGGCAGGGGG	0	1
LMNA	chr1	156076750	156076778	rs529230595	156076762	T	C	0.000199681	GGGTTCCTTGGGATCTGGGTCGAAGAGGG	GGGTTCCTTGGGACCTGGGTCGAAGAGGG	0	1
MRPS22	chr3	138944432	138944453	rs530978279	138944433	G	A	0.000199681	GGGCTCCACGGGGTAGGGTGGG	GGACTCCACGGGGTAGGGTGGG	0	1
RNASEH2B	chr13	51518157	51518188	rs531090425	51518185	G	A	0.000199681	GGGACGGACGGGACGTGATGGGACGGGACGGG	GGGACGGACGGGACGTGATGGGACGGGACAGG	0	1
CHRNG	chr2	233406699	233406721	rs531445189	233406708	G	A	0.000199681	GGGGAGGAGGGCCCGGGGGAGGG	GGGGAGGAGGACCCGGGGGAGGG	0	1
CACNB2	chr10	18551242	18551263	rs531453884	18551257	G	A	0.000199681	GGGGTGGGGTGGGAGGGCAGGG	GGGGTGGGGTGGGAGGACAGGG	0	1
ZAP70	chr2	98351238	98351259	rs532293567	98351249	G	A	0.000199681	GGGCTGTGGGACGGGAGCCGGG	GGGCTGTGGGACAGGAGCCGGG	0	1
ESR1	chr6	152126596	152126618	rs532501765	152126603	G	A	0.000199681	GGGTAGGGGCAAAGGGGCTGGGG	GGGTAGGGACAAAGGGGCTGGGG	0	1
IFNAR2	chr21	34623224	34623250	rs533640185	34623231	T	C	0.000199681	GGGTTAGATAGGGTTAGAGGGTTTGGG	GGGTTAGACAGGGTTAGAGGGTTTGGG	0	1
TBX4	chr17	59529963	59529990	rs533867622	59529967	G	A	0.000199681	GGGACGAGCTGGGCGTGCGGGGCTGGGG	GGGACAAGCTGGGCGTGCGGGGCTGGGG	0	1
PAX7	chr1	18995573	18995604	rs535174081	18995596	G	A	0.000199681	GGGGGCCCTTGGGAGGGATCGGGGGCCAAGGG	GGGGGCCCTTGGGAGGGATCGGGGACCAAGGG	0	1
MYO7A	chr11	76909486	76909505	rs536737014	76909492	G	A	0.000199681	GGGCTGGGCCTGGGTGTGGG	GGGCTGGACCTGGGTGTGGG	0	1
ITGAM	chr16	31339300	31339323	rs537001427	31339306	G	A	0.000199681	GGGATGGGCCTGGGCTAGGCGGGG	GGGATGGACCTGGGCTAGGCGGGG	0	1
CACNA1C	chr12	2488322	2488341	rs537046610	2488330	G	A	0.000199681	GGGAGGGTGGCAGGGCAGGG	GGGAGGGTGACAGGGCAGGG	0	1
CNTNAP2	chr7	146816826	146816851	rs537061895	146816846	A	C	0.000199681	GGGAGTGTGGGAGGGGAAAGAAAGGG	GGGAGTGTGGGAGGGGAAAGACAGGG	0	1
POLD1	chr19	50901880	50901906	rs538056218	50901885	G	C	0.000199681	GGGAGAGAGGGTCGGGGAGTCGACGGG	GGGAGACAGGGTCGGGGAGTCGACGGG	0	1
RNASEH2B	chr13	51492915	51492942	rs541348550	51492934	G	A	0.000199681	GGGTGCCGGGGCAGTGGGACGGGGAGGG	GGGTGCCGGGGCAGTGGGACAGGGAGGG	0	1
COL18A1	chr21	46927283	46927306	rs542999461	46927300	G	A	0.000199681	GGGAGGGCCGGGTGCTGGGCAGGG	GGGAGGGCCGGGTGCTGGACAGGG	0	1
CCDC50	chr3	191092859	191092884	rs543189163	191092870	G	A	0.000199681	GGGTCAAGGAGGGCCAGGGAATTGGG	GGGTCAAGGAGGACCAGGGAATTGGG	0	1
MRPS22	chr3	139020042	139020068	rs544444045	139020060	G	A	0.000199681	GGGCACCAGGGCAGGGAGGGCTCGGGG	GGGCACCAGGGCAGGGAGGACTCGGGG	0	1
SOBP	chr6	107981086	107981109	rs545308629	107981089	G	A	0.000199681	GGGGGCAGGGGAAGGGGAGGCGGG	GGGGACAGGGGAAGGGGAGGCGGG	0	1
ETV6	chr12	11889961	11889982	rs546622672	11889975	C	A	0.000199681	GGGTGTGTGGGAGGGCCTGGGG	GGGTGTGTGGGAGGGACTGGGG	0	1
CAPN10	chr2	241526191	241526221	rs546868396	241526201	G	A	0.000199681	GGGGCCCTCGGGCTTGGAGGGCTGGGCCGGG	GGGGCCCTCGGACTTGGAGGGCTGGGCCGGG	0	1
GLI2	chr2	121688400	121688428	rs547392718	121688404	C	A	0.000199681	GGGAGCCCTGGGCTGGGAAGGGGCCTGGG	GGGAGACCTGGGCTGGGAAGGGGCCTGGG	0	1
PAX7	chr1	19000254	19000282	rs547877723	19000275	G	A	0.000199681	GGGTGGATGAGGGATTCCACGGGCAAGGG	GGGTGGATGAGGGATTCCACGGACAAGGG	0	1
SC5D	chr11	121163896	121163920	rs547882338	121163910	G	A	0.000199681	GGGAGGGATCGCGGGGCCGATAGGG	GGGAGGGATCGCGGGACCGATAGGG	0	1
MBNL1	chr3	152168307	152168335	rs549752228	152168310	G	A	0.000199681	GGGAGCTGTGGGGTCTGGGAGGCACAGGG	GGGAACTGTGGGGTCTGGGAGGCACAGGG	0	1
ICAM1	chr19	10395719	10395743	rs551439891	10395736	G	A	0.000199681	GGGCAGAGCTGGGTGGGGGCAGGGG	GGGCAGAGCTGGGTGGGGACAGGGG	0	1
CAPN5	chr11	76804870	76804894	rs551509729	76804871	G	A	0.000199681	GGGCAGAGTGGGCAGGGTGCTGGGG	GGACAGAGTGGGCAGGGTGCTGGGG	0	1
ADCK3	chr1	227169148	227169177	rs551711698	227169165	G	A	0.000199681	GGGCCTCTGTGGGTGGACGGGAGAGACGGG	GGGCCTCTGTGGGTGGACAGGAGAGACGGG	0	1
ESPN	chr1	6500225	6500252	rs552577560	6500238	G	T	0.000199681	GGGCTCCCCGGGACGGGATGGGGGCGGG	GGGCTCCCCGGGACTGGATGGGGGCGGG	0	1
CAMTA1	chr1	7496402	7496428	rs553813334	7496410	C	A	0.000199681	GGGAGGGGGCCTGGGAGGGAAAAGGGG	GGGAGGGGGACTGGGAGGGAAAAGGGG	0	1
KALRN	chr3	124321489	124321515	rs554255646	124321490	G	A	0.000199681	GGGCTGGGTCTTAAAGGGTCAGGAGGG	GGACTGGGTCTTAAAGGGTCAGGAGGG	0	1
IL17RA	chr22	17581155	17581183	rs554730383	17581170	G	A	0.000199681	GGGAGTGGGTGGGAACGGGGGTCTTTGGG	GGGAGTGGGTGGGAACAGGGGTCTTTGGG	0	1
TRIOBP	chr22	38105270	38105296	rs557629745	38105278	G	A	0.000199681	GGGCTCTGGGCTCCAGGGTCCCCAGGG	GGGCTCTGGACTCCAGGGTCCCCAGGG	0	1
TMIE	chr3	46751879	46751902	rs558232024	46751896	G	A	0.000199681	GGGGCTGGGGGCTGCAGGGCTGGG	GGGGCTGGGGGCTGCAGGACTGGG	0	1
COLEC11	chr2	3679179	3679196	rs559643054	3679183	G	A	0.000199681	GGGACGGGAGGGTTTGGG	GGGACAGGAGGGTTTGGG	0	1
CACNA1C	chr12	2372332	2372361	rs560982080	2372340	G	A	0.000199681	GGGGAGAGGGCATTCAAGGGAGCAGGAGGG	GGGGAGAGGACATTCAAGGGAGCAGGAGGG	0	1
CACNA1H	chr16	1262429	1262453	rs562200441	1262432	G	A	0.000199681	GGGGGCTGAGGGAGAGCAGGGAGGG	GGGGACTGAGGGAGAGCAGGGAGGG	0	1
HTT	chr4	3245211	3245236	rs562539579	3245212	G	A	0.000199681	GGGCCTGGGCCTCCTGGGAAGGAGGG	GGACCTGGGCCTCCTGGGAAGGAGGG	0	1
SPECC1L	chr22	24807376	24807393	rs563253972	24807384	G	A	0.000199681	GGGTGGGACGGGTTGGGG	GGGTGGGACAGGTTGGGG	0	1
INF2	chr14	105173130	105173160	rs567464683	105173133	T	A	0.000199681	GGGATCCGTGGGAATAGAGGGGGTGATGGGG	GGGAACCGTGGGAATAGAGGGGGTGATGGGG	0	1
KALRN	chr3	124058069	124058097	rs567522228	124058078	G	A	0.000199681	GGGAGGGGACGGGTGCAGGTGGGCTGGGG	GGGAGGGGACAGGTGCAGGTGGGCTGGGG	0	1
PSEN2	chr1	227063723	227063747	rs568126638	227063743	G	A	0.000199681	GGGGTGCAGGGGGTGGGAGACGGGG	GGGGTGCAGGGGGTGGGAGACAGGG	0	1
PIGL	chr17	16166360	16166385	rs568231221	16166376	A	C	0.000199681	GGGGTTGGGAGGAGGGAAAAATGGGG	GGGGTTGGGAGGAGGGACAAATGGGG	0	1
WBSCR22	chr7	73107870	73107895	rs568627850	73107887	G	A	0.000199681	GGGGGTGCGGGTGGGGGAGCTGAGGG	GGGGGTGCGGGTGGGGGAACTGAGGG	0	1
CACNA1C	chr12	2424820	2424846	rs569090422	2424821	G	A	0.000199681	GGGCTTGGGGGAAGGGGTGTAAAAGGG	GGACTTGGGGGAAGGGGTGTAAAAGGG	0	1
NPAS2	chr2	101506408	101506432	rs569715868	101506414	G	A	0.000199681	GGGGTGGGCATGTTCGGGGGCGGGG	GGGGTGGACATGTTCGGGGGCGGGG	0	1
LEPR	chr1	65990957	65990976	rs571868717	65990971	G	A	0.000199681	GGGGGTGGGAGGGACGGGGG	GGGGGTGGGAGGGACAGGGG	0	1
ITGB4	chr17	73751483	73751504	rs573342817	73751497	G	A	0.000199681	GGGGGCGGGGCTGGGGCTGGGG	GGGGGCGGGGCTGGGACTGGGG	0	1
EXT2	chr11	44118141	44118166	rs574097043	44118152	G	A	0.000199681	GGGGTGTGTCGGGCCGGGGCCAGGGG	GGGGTGTGTCGGACCGGGGCCAGGGG	0	1
EPB41L1	chr20	34693982	34694005	rs576165778	34693999	G	A	0.000199681	GGGGAGGTGTGGGGGAGGGCAGGG	GGGGAGGTGTGGGGGAGGACAGGG	0	1
NFIX	chr19	13201609	13201637	rs576583643	13201624	G	A	0.000199681	GGGTGGGCTGGGTGACGGGTGGAGGAGGG	GGGTGGGCTGGGTGACAGGTGGAGGAGGG	0	1
FBLN1	chr22	45949267	45949283	rs576746329	45949275	G	A	0.000199681	GGGGGGGACGGGGCGGG	GGGGGGGACAGGGCGGG	0	1
COL6A2	chr21	47531512	47531536	rs577126834	47531521	G	A	0.000199681	GGGGTCGGGGGCCGGGGGCTCTGGG	GGGGTCGGGGACCGGGGGCTCTGGG	0	1
FLNC	chr7	128480774	128480795	rs578107490	128480782	G	A	0.000199681	GGGAGGGACGAGGGGCACTGGG	GGGAGGGACAAGGGGCACTGGG	0	1
ARHGEF10	chr8	1893826	1893847	rs578186837	1893839	G	A	0.000199681	GGGGACGGGACGGGGCCCAGGG	GGGGACGGGACGGGACCCAGGG	0	1
ATN1	chr12	7038335	7038363	rs782138486	7038348	G	C	0.000199681	GGGGGAGTTGGGAAGAAAGGGGTTCTGGG	GGGGGAGTTGGGAACAAAGGGGTTCTGGG	0	1
ATN1	chr12	7050246	7050270	rs782802586	7050259	G	A	0.000199681	GGGTGGGGGGATGGGCCTAGTTGGG	GGGTGGGGGGATGGACCTAGTTGGG	0	1
CNTNAP2	chr7	146899879	146899906	rs1054263426	146899880	G	A	0.000215023	GGGCCTGTAGGGGGGTAGGGGGCTGGGG	GGACCTGTAGGGGGGTAGGGGGCTGGGG	0	1
LGI1	chr10	95543267	95543286	rs558920311	95543269	G	A	0.000223001	GGGGCTGTGGGGAGGGAGGG	GGGACTGTGGGGAGGGAGGG	0	1
DOK7	chr4	3467544	3467567	rs749429507	3467551	C	A	0.000223143	GGGCAGGGCCCCGGGGGAGGAGGG	GGGCAGGGACCCGGGGGAGGAGGG	0	1
BMPR2	chr2	203361692	203361713	rs1000286826	203361697	G	A	0.000223214	GGGTGGGCATGGGCTTGGCGGG	GGGTGGACATGGGCTTGGCGGG	0	1
TSHZ1	chr18	72924122	72924151	rs1007026784	72924128	G	A	0.000223214	GGGGGAGGCCGGGGGCCGCGGGACGGCGGG	GGGGGAGACCGGGGGCCGCGGGACGGCGGG	0	1
SLC6A19	chr5	1203576	1203605	rs1025017730	1203582	G	A	0.000223214	GGGCCGAGCAGGGCTCTGGGATGTGCTGGG	GGGCCGAACAGGGCTCTGGGATGTGCTGGG	0	1
SERPINH1	chr11	75273134	75273154	rs1030930892	75273140	G	A	0.000223214	GGGAGGGGCCGGGGGCCGGGG	GGGAGGGACCGGGGGCCGGGG	0	1
PRKCG	chr19	54386854	54386876	rs1164107883	54386865	G	A	0.000223214	GGGCGAGTGGGGGCCGGGCGGGG	GGGCGAGTGGGGACCGGGCGGGG	0	1
CHRNG	chr2	233406003	233406031	rs1169717712	233406005	G	A	0.000223214	GGGGCACAGGGGCTGGTCTGGGGCTGGGG	GGGACACAGGGGCTGGTCTGGGGCTGGGG	0	1
VAPB	chr20	57018801	57018824	rs1209165649	57018807	G	A	0.000223214	GGGTGGGGCCGAGGGTGCAAAGGG	GGGTGGGACCGAGGGTGCAAAGGG	0	1
DPP6	chr7	154600421	154600446	rs1210061989	154600441	T	C	0.000223214	GGGATTGACGGGGCATAGGGATTGGG	GGGATTGACGGGGCATAGGGACTGGG	0	1
CALM3	chr19	47105137	47105164	rs1240269401	47105150	G	A	0.000223214	GGGGAACGGGGGACGAAGGGAGGCTGGG	GGGGAACGGGGGACAAAGGGAGGCTGGG	0	1
PACS1	chr11	65973919	65973936	rs1249995064	65973925	G	A	0.000223214	GGGCTGGGCTGGGCTGGG	GGGCTGGACTGGGCTGGG	0	1
BMP1	chr8	22037347	22037370	rs1254648023	22037348	G	A	0.000223214	GGGCAGAGAAGGGATGGGTGAGGG	GGACAGAGAAGGGATGGGTGAGGG	0	1
SLC35A1	chr6	88182747	88182775	rs1275512521	88182749	T	A	0.000223214	GGGTCTGCTGGGAGTGGGGAGTCCGCGGG	GGGACTGCTGGGAGTGGGGAGTCCGCGGG	0	1
PLCG2	chr16	81872204	81872231	rs1320026510	81872210	T	A	0.000223214	GGGCCTGTCAGGGGGTGGGGGCAAGGGG	GGGCCTGACAGGGGGTGGGGGCAAGGGG	0	1
GPI	chr19	34856702	34856723	rs1320034651	34856707	G	A	0.000223214	GGGCGGGCAGCCCGGGCGGGGG	GGGCGGACAGCCCGGGCGGGGG	0	1
ROBO3	chr11	124735810	124735838	rs1339398296	124735831	G	A	0.000223214	GGGTACCCGCGGGAGGTCGAGGGCTTGGG	GGGTACCCGCGGGAGGTCGAGGACTTGGG	0	1
DOK7	chr4	3494355	3494381	rs1365316469	3494365	G	A	0.000223214	GGGGCTTGGGGGCTGGAAGGGGTGGGG	GGGGCTTGGGGACTGGAAGGGGTGGGG	0	1
GPHN	chr14	67345915	67345943	rs1439341676	67345921	T	A	0.000223214	GGGCCTGTCAGGGGATGGAGGGTTAGGGG	GGGCCTGACAGGGGATGGAGGGTTAGGGG	0	1
AQP1	chr7	30928656	30928679	rs1443051360	30928671	G	A	0.000223214	GGGGCGGGGTGAAGGGGCCTGGGG	GGGGCGGGGTGAAGGGACCTGGGG	0	1
INF2	chr14	105184657	105184686	rs1447147892	105184677	G	A	0.000223214	GGGGCCGTCTGGGTGGCGGGAGCTGTTGGG	GGGGCCGTCTGGGTGGCGGGAACTGTTGGG	0	1
GHRHR	chr7	31014302	31014328	rs1462048475	31014311	G	A	0.000223214	GGGCTGTGGGGCTGGGGGAAGGTGGGG	GGGCTGTGGGACTGGGGGAAGGTGGGG	0	1
ZBTB38	chr3	141149481	141149505	rs764385338	141149492	G	A	0.000223214	GGGTGCAGAGGGGCAGGGAGTGGGG	GGGTGCAGAGGGACAGGGAGTGGGG	0	1
KCNK3	chr2	26950441	26950466	rs866511611	26950453	G	A	0.000223214	GGGAGGTGGCGGGGCAACGGGGAGGG	GGGAGGTGGCGGGACAACGGGGAGGG	0	1
ADIPOQ	chr3	186570970	186571000	rs892192374	186570981	G	A	0.000223214	GGGCATCCCAGGGCATCCGGGCCATAATGGG	GGGCATCCCAGGACATCCGGGCCATAATGGG	0	1
ARHGAP31	chr3	119098141	119098163	rs895270530	119098148	G	C	0.000223214	GGGAAAAAGTGGGAGGGATTGGG	GGGAAAAACTGGGAGGGATTGGG	0	1
AGRN	chr1	970550	970572	rs1241036934	970565	G	A	0.000229568	GGGGGGGGGGGGGTGGGCAGGGG	GGGGGGGGGGGGGTGGACAGGGG	0	1
SLC29A3	chr10	73102353	73102379	rs1004166694	73102354	G	A	0.000230951	GGGCCTCACCGGGGCTTGGGCTGGGGG	GGACCTCACCGGGGCTTGGGCTGGGGG	0	1
AGRN	chr1	975179	975210	rs900729169	975183	G	A	0.000238914	GGGGGGCCGGGGGATGCCCAGGGAGGAGGGGG	GGGGGACCGGGGGATGCCCAGGGAGGAGGGGG	0	1
GLCCI1	chr7	8026000	8026020	rs1198087756	8026003	G	C	0.000241779	GGGAGCAGGGGGAGGGGGGGG	GGGACCAGGGGGAGGGGGGGG	0	1
KCNQ1	chr11	2688199	2688225	rs536499927	2688200	G	A	0.000254712	GGGCCCGCCCGGGAGGGCTGTACAGGG	GGACCCGCCCGGGAGGGCTGTACAGGG	0	1
MCM4	chr8	48873639	48873661	rs886062973	48873640	G	A	0.000255135	GGGCAGGGAAGCCGGGAGGCGGG	GGACAGGGAAGCCGGGAGGCGGG	0	1
COL18A1	chr21	46842619	46842647	rs548619911	46842637	G	A	0.00025745	GGGTGAGGCGGGGCTGTGGGCCTCCTGGG	GGGTGAGGCGGGGCTGTGGACCTCCTGGG	0	1
BCKDHB	chr6	80998623	80998650	rs370347308	80998635	G	A	0.000259471	GGGAAGCTTAGGGGCAGGGATGGAGGGG	GGGAAGCTTAGGGACAGGGATGGAGGGG	0	1
DPP6	chr7	154491499	154491522	rs544759498	154491500	G	A	0.000259471	GGGCAGGGCGACCTTGGGTCAGGG	GGACAGGGCGACCTTGGGTCAGGG	0	1
FGFR3	chr4	1804431	1804453	rs776315262	1804438	G	A	0.000259471	GGGTCTGGGCTGGGTTGTTGGGG	GGGTCTGGACTGGGTTGTTGGGG	0	1
MEF2A	chr15	100083096	100083127	rs778775028	100083122	G	C	0.000259471	GGGAGGAGTGGGGAGAGAATGGGGGGAGTGGG	GGGAGGAGTGGGGAGAGAATGGGGGGACTGGG	0	1
CD96	chr3	111023779	111023804	rs780238067	111023786	G	A	0.000259471	GGGTAGGGGCAATGGGAGAGCCAGGG	GGGTAGGGACAATGGGAGAGCCAGGG	0	1
ESRRB	chr14	76932520	76932549	rs78809791	76932524	G	A	0.000259471	GGGGGGCTTTGGGGGTCCAGGGGCTTGGGG	GGGGGACTTTGGGGGTCCAGGGGCTTGGGG	0	1
CALM3	chr19	47107854	47107875	rs1022100242	47107858	G	A	0.000265217	GGGACGGGGATGGGGGTAGGGG	GGGACAGGGATGGGGGTAGGGG	0	1
WDR65	chr1	43709050	43709075	rs746997647	43709069	G	A	0.000269687	GGGGAGATGGGCACTGGGACGAAGGG	GGGGAGATGGGCACTGGGACAAAGGG	0	1
GLYCTK	chr3	52328377	52328402	rs751401439	52328388	G	A	0.000269687	GGGTGTGGAGGGGCCCTGGGCCAGGG	GGGTGTGGAGGGACCCTGGGCCAGGG	0	1
JPH3	chr16	87722296	87722324	rs755866251	87722304	G	A	0.000269687	GGGCAGGACGGGGATGCTGGGGGCGGGGG	GGGCAGGACAGGGATGCTGGGGGCGGGGG	0	1
MESP2	chr15	90320122	90320143	rs760653588	90320136	G	A	0.000269687	GGGGCAGGGGCAAGGGCAGGGG	GGGGCAGGGGCAAGGACAGGGG	0	1
GRM1	chr6	146383469	146383497	rs748520054	146383470	G	A	0.000280721	GGGCCTGTTGGGGGGTAGGGGGCTAGGGG	GGACCTGTTGGGGGGTAGGGGGCTAGGGG	0	1
ITGB4	chr17	73738845	73738867	rs75139442	73738859	G	C	0.000286697	GGGTCTGGGTGGGGAGAGTGGGG	GGGTCTGGGTGGGGACAGTGGGG	0	1
NOS1AP	chr1	162167957	162167986	rs182800730	162167979	G	C	0.000318674	GGGGCTGGGAGGGAGCTAGGGGAGCCAGGG	GGGGCTGGGAGGGAGCTAGGGGACCCAGGG	0	1
COL4A2	chr13	111060568	111060599	rs545872858	111060570	G	A	0.00033448	GGGGCCACAAGGGTCCCCAGGGCGGGGAGGGG	GGGACCACAAGGGTCCCCAGGGCGGGGAGGGG	0	1
CAMTA1	chr1	6978750	6978772	rs538697320	6978766	G	A	0.000366335	GGGCAGAGGGAGGGGAGGCTGGG	GGGCAGAGGGAGGGGAGACTGGG	0	1
HEXB	chr5	73967342	73967370	rs958568289	73967350	G	A	0.000366335	GGGCCAGGGGCAGGGAGGGGAGAGAAGGG	GGGCCAGGGACAGGGAGGGGAGAGAAGGG	0	1
MYO15A	chr17	18050812	18050835	rs144488243	18050829	C	A	0.000399361	GGGATTGGGCTCATTGGGCCTGGG	GGGATTGGGCTCATTGGGACTGGG	0	1
KALRN	chr3	124400016	124400042	rs148447012	124400017	G	A	0.000399361	GGGCACAGAGGGATGTGGGGCCAGGGG	GGACACAGAGGGATGTGGGGCCAGGGG	0	1
NFIX	chr19	13178102	13178120	rs534319171	13178107	G	A	0.000399361	GGGAGGGCCAGGGGATGGG	GGGAGGACCAGGGGATGGG	0	1
IRF5	chr7	128579517	128579539	rs539962880	128579525	T	C	0.000399361	GGGGTGGGATTTGGGGGTCAGGG	GGGGTGGGACTTGGGGGTCAGGG	0	1
ZAP70	chr2	98351639	98351668	rs541074964	98351657	G	A	0.000399361	GGGTGGGTGGGGGTGTGGGGCCGAGCAGGG	GGGTGGGTGGGGGTGTGGGACCGAGCAGGG	0	1
RAD51B	chr14	69073843	69073868	rs543295585	69073858	C	A	0.000399361	GGGTCATGCGGGCGGGCCACTGAGGG	GGGTCATGCGGGCGGGACACTGAGGG	0	1
MC1R	chr16	89985498	89985524	rs547076646	89985501	G	C	0.000399361	GGGAGAGGGTGTGAGGGCAGATCTGGG	GGGACAGGGTGTGAGGGCAGATCTGGG	0	1
NFIX	chr19	13207171	13207196	rs551067166	13207193	G	A	0.000399361	GGGAGGGAAGAGGAGGGAGTGACGGG	GGGAGGGAAGAGGAGGGAGTGACAGG	0	1
ATP8A2	chr13	26586829	26586857	rs553076282	26586851	G	A	0.000399361	GGGGGAGCGGGCGCTGATGGGGGGCCGGG	GGGGGAGCGGGCGCTGATGGGGGACCGGG	0	1
TSHZ1	chr18	72992972	72992993	rs553197127	72992973	G	A	0.000399361	GGGCTGGGCACAGAGGGCTGGG	GGACTGGGCACAGAGGGCTGGG	0	1
VPS13B	chr8	100246759	100246784	rs556933194	100246761	G	A	0.000399361	GGGGCCGCAGGGCTGGGGTTCGGGGG	GGGACCGCAGGGCTGGGGTTCGGGGG	0	1
CALM3	chr19	47104486	47104503	rs557550092	47104487	G	A	0.000399361	GGGCCGGGTGGGGCGGGG	GGACCGGGTGGGGCGGGG	0	1
RYR2	chr1	237656187	237656214	rs560710244	237656208	G	A	0.000399361	GGGAGGGAGGGAGGGAGGGAAAGCAGGG	GGGAGGGAGGGAGGGAGGGAAAACAGGG	0	1
WNK4	chr17	40946737	40946759	rs569689380	40946743	G	A	0.000399361	GGGAAGGGCATAGGGCATGTGGG	GGGAAGGACATAGGGCATGTGGG	0	1
COL9A3	chr20	61456483	61456514	rs571127188	61456494	G	A	0.000399361	GGGAGGGGCTGGGCTCCGGCGGGAGGGAGGGG	GGGAGGGGCTGGACTCCGGCGGGAGGGAGGGG	0	1
DISC1	chr1	232084190	232084218	rs573151048	232084192	G	A	0.000399361	GGGGCCTGTCGGGTGGTGGGGGGCTCGGG	GGGACCTGTCGGGTGGTGGGGGGCTCGGG	0	1
SLC12A3	chr16	56932109	56932130	rs574772736	56932110	G	A	0.000399361	GGGCAAGGGGTTGGGGGGAGGG	GGACAAGGGGTTGGGGGGAGGG	0	1
NOS1AP	chr1	162140832	162140855	rs577601880	162140846	G	A	0.000399361	GGGGTGGGGTCCAGGGCCTCTGGG	GGGGTGGGGTCCAGGACCTCTGGG	0	1
PALLD	chr4	169839673	169839701	rs541546853	169839681	G	A	0.000446343	GGGCTAGACGGGGAGAGGGAAAGTTGGGG	GGGCTAGACAGGGAGAGGGAAAGTTGGGG	0	1
DYSF	chr2	71730848	71730874	rs1039348799	71730850	T	A	0.000446429	GGGTCACAGGGCATGAGGGATGGAGGG	GGGACACAGGGCATGAGGGATGGAGGG	0	1
CNTNAP2	chr7	146005921	146005941	rs1304541226	146005932	G	A	0.000446429	GGGTGGGGAGACGGGGGAGGG	GGGTGGGGAGACAGGGGAGGG	0	1
PTH1R	chr3	46922924	46922950	rs994364409	46922941	G	C	0.000446429	GGGAGTGGGGGTGGGAACGGGGGAGGG	GGGAGTGGGGGTGGGAACCGGGGAGGG	0	1
CACNB2	chr10	18635522	18635552	rs374952770	18635544	G	A	0.000453937	GGGGGAGGAGGGGAGCTCGGGGGGCACAGGG	GGGGGAGGAGGGGAGCTCGGGGGACACAGGG	0	1
CACNA1C	chr12	2284719	2284736	rs952256116	2284728	G	A	0.000469865	GGGTGGGTGGGCTCCGGG	GGGTGGGTGGACTCCGGG	0	1
EIF2B5	chr3	183951260	183951291	rs753166314	183951262	T	G	0.000503187	GGGTACCCAGGGATGGGAAGGGTGAGGAAGGG	GGGGACCCAGGGATGGGAAGGGTGAGGAAGGG	0	1
ASXL1	chr20	31008860	31008889	rs372206384	31008862	G	A	0.000503322	GGGGCCTGTTGGGGGGTGGGGGGAAAGGGG	GGGACCTGTTGGGGGGTGGGGGGAAAGGGG	0	1
KALRN	chr3	124378429	124378451	rs145189655	124378446	G	A	0.000518941	GGGAGGGGTGGTAGGGACGTGGG	GGGAGGGGTGGTAGGGACATGGG	0	1
SPINT2	chr19	38742816	38742843	rs148328410	38742817	G	A	0.000539374	GGGCAGGTTGGGGCCGGGGGTGGTGGGG	GGACAGGTTGGGGCCGGGGGTGGTGGGG	0	1
DNM2	chr19	10930770	10930798	rs75344643	10930781	C	A	0.000553975	GGGGCCCAGGGGCCTGGGGATGGCTCGGG	GGGGCCCAGGGGACTGGGGATGGCTCGGG	0	1
OSMR	chr5	38863291	38863319	rs1221175455	38863294	G	C	0.000554631	GGGAGAGGGGGAGGGGGAGGGGGAGGGGG	GGGACAGGGGGAGGGGGAGGGGGAGGGGG	0	1
GNA11	chr19	3114466	3114492	rs111675141	3114482	G	A	0.000599042	GGGAGCAGCAGGGAGACGGGCACGGGG	GGGAGCAGCAGGGAGACAGGCACGGGG	0	1
HSD17B4	chr5	118968716	118968741	rs111782593	118968724	G	A	0.000599042	GGGAGTGGGGCTTTTTGGGTTTGGGG	GGGAGTGGGACTTTTTGGGTTTGGGG	0	1
CFTR	chr7	117313833	117313854	rs139271463	117313841	G	A	0.000599042	GGGGTAGACGGGGCGGGATGGG	GGGGTAGACAGGGCGGGATGGG	0	1
CACNA1H	chr16	1206048	1206074	rs143678008	1206067	G	C	0.000599042	GGGCTCTCTGGGCTGGGAGAGAATGGG	GGGCTCTCTGGGCTGGGAGACAATGGG	0	1
ATP8A2	chr13	26312702	26312729	rs536968620	26312713	G	A	0.000599042	GGGTGGGAAGGGGCCTGGGCCTGGAGGG	GGGTGGGAAGGGACCTGGGCCTGGAGGG	0	1
KCNQ1	chr11	2488418	2488447	rs539507978	2488429	G	A	0.000599042	GGGTGGAAGTGGGCTGTGAGGGGGTCTGGG	GGGTGGAAGTGGACTGTGAGGGGGTCTGGG	0	1
PADI4	chr1	17683264	17683290	rs558967496	17683281	G	A	0.000599042	GGGGTTGGCTGGGCAAACGGGGCAGGG	GGGGTTGGCTGGGCAAACAGGGCAGGG	0	1
EIF2B5	chr3	183980265	183980294	rs200605421	183980288	G	T	0.000605906	GGGGCGCCCTGGGCTGCGGGTGACGCGGGG	GGGGCGCCCTGGGCTGCGGGTGACTCGGGG	0	1
MYO9B	chr19	17321011	17321037	rs973498767	17321017	G	A	0.000606061	GGGGAACGGGCTCTGGGCTCCTGTGGG	GGGGAACAGGCTCTGGGCTCCTGTGGG	0	1
MYO7A	chr11	76873833	76873852	rs142996141	76873834	G	A	0.000637633	GGGCAGGGAGGGGAGTGGGG	GGACAGGGAGGGGAGTGGGG	0	1
SCN8A	chr12	51984861	51984886	rs1406207332	51984868	G	A	0.000660996	GGGCCGGGGCCGGCCCGGGCAGGGGG	GGGCCGGGACCGGCCCGGGCAGGGGG	0	1
SMAD3	chr15	67391178	67391202	rs74811524	67391192	G	A	0.000661501	GGGGGATTTGGGGACGGTGGGAGGG	GGGGGATTTGGGGACAGTGGGAGGG	0	1
SDCCAG8	chr1	243556842	243556861	rs1178034258	243556853	G	A	0.000669643	GGGTGGGGGTGGGCATTGGG	GGGTGGGGGTGGACATTGGG	0	1
ATXN7	chr3	63898118	63898144	rs1201779940	63898128	G	A	0.000669643	GGGCTCGGGGGGCTGGGCGGCCATGGG	GGGCTCGGGGGACTGGGCGGCCATGGG	0	1
RNF213	chr17	78283187	78283211	rs571740256	78283205	G	A	0.000700726	GGGCTTTCCTGGGAGGGAGGCAGGG	GGGCTTTCCTGGGAGGGAGACAGGG	0	1
BBS9	chr7	33258956	33258979	rs550094880	33258971	G	A	0.000701486	GGGCTGGGGAGTGCGGGCACAGGG	GGGCTGGGGAGTGCGGACACAGGG	0	1
IGF1R	chr15	99193003	99193029	rs532610192	99193012	G	A	0.000798722	GGGCCCCCGGGCTCGGGAGCGGCGGGG	GGGCCCCCGGACTCGGGAGCGGCGGGG	0	1
STK4	chr20	43703153	43703179	rs536876308	43703166	G	A	0.000798722	GGGGGTGTGGGAAGGCAGGGTTAGGGG	GGGGGTGTGGGAAGACAGGGTTAGGGG	0	1
ST3GAL3	chr1	44257623	44257649	rs558022447	44257643	G	A	0.000798722	GGGTGGGCATGGGCCTGGGAGGCTGGG	GGGTGGGCATGGGCCTGGGAGACTGGG	0	1
SLC5A1	chr22	32465243	32465266	rs1275072445	32465245	T	A	0.000892857	GGGTCTGGGGGTGAGCGGGTGGGG	GGGACTGGGGGTGAGCGGGTGGGG	0	1
HGSNAT	chr8	43036324	43036344	rs1277139454	43036339	G	C	0.00095057	GGGAGAGGGAGAGGGAGAGGG	GGGAGAGGGAGAGGGACAGGG	0	1
CDH1	chr16	68780881	68780906	rs545006747	68780899	G	C	0.000955657	GGGGTGGATGGGTGTGGGAGTGGGGG	GGGGTGGATGGGTGTGGGACTGGGGG	0	1
FFAR4	chr10	95335695	95335717	rs192564639	95335696	G	A	0.000998403	GGGCAGTGGGAGGGATTCTGGGG	GGACAGTGGGAGGGATTCTGGGG	0	1
TSHZ1	chr18	72992972	72992993	rs148316827	72992978	G	A	0.00108322	GGGCTGGGCACAGAGGGCTGGG	GGGCTGGACACAGAGGGCTGGG	0	1
RNF213	chr17	78329180	78329209	rs181621818	78329184	G	C	0.00110657	GGGAAGAAGCGGGGTGAATGGGAATGGGGG	GGGAACAAGCGGGGTGAATGGGAATGGGGG	0	1
ARHGEF10	chr8	1838861	1838890	rs1231977414	1838882	T	A	0.00111607	GGGTCACGGGGTCCGTGGGGTGTCACTGGG	GGGTCACGGGGTCCGTGGGGTGACACTGGG	0	1
ARHGEF10	chr8	1838861	1838890	rs1470367423	1838883	C	G	0.00111607	GGGTCACGGGGTCCGTGGGGTGTCACTGGG	GGGTCACGGGGTCCGTGGGGTGTGACTGGG	0	1
RBPJ	chr4	26322520	26322544	rs185848565	26322538	G	A	0.00114943	GGGGAAAGGGAGCGCGGGGGCTGGG	GGGGAAAGGGAGCGCGGGGACTGGG	0	1
GABRD	chr1	1955655	1955685	rs544277569	1955658	G	A	0.00119808	GGGGGCCGGGGGGGTGCTGGGGTGCTCTGGG	GGGGACCGGGGGGGTGCTGGGGTGCTCTGGG	0	1
PEX14	chr1	10687473	10687496	rs150765243	10687476	G	C	0.00147331	GGGAGCTCTGGGGCATGGGAGGGG	GGGACCTCTGGGGCATGGGAGGGG	0	1
BCMO1	chr16	81309440	81309468	rs558366402	81309459	C	A	0.00159744	GGGCTGGCAGGGCCTCTGGGCACCGTGGG	GGGCTGGCAGGGCCTCTGGGAACCGTGGG	0	1
KCNQ4	chr1	41250596	41250627	rs187779840	41250617	G	A	0.00162545	GGGTGTGTGGGGGTCCCTGTGGGCCCCCTGGG	GGGTGTGTGGGGGTCCCTGTGGACCCCCTGGG	0	1
RGS9	chr17	63217104	63217127	rs1225300683	63217121	G	A	0.00166667	GGGGCATGGGCTGGAGGGGCTGGG	GGGGCATGGGCTGGAGGGACTGGG	0	1
EPAS1	chr2	46526429	46526453	rs1558579074	46526448	T	C	0.00166667	GGGATCGCTAGGGGAGGGGATTGGG	GGGATCGCTAGGGGAGGGGACTGGG	0	1
GNAL	chr18	11689986	11690013	rs1567986156	11690004	G	A	0.00166667	GGGCCCGCGGGGGCGGCGGGCACCGGGG	GGGCCCGCGGGGGCGGCGGACACCGGGG	0	1
SMOC2	chr6	168860531	168860554	rs143764090	168860541	G	A	0.00173244	GGGCTGGGTGAGCCCGGGGGTGGG	GGGCTGGGTGAACCCGGGGGTGGG	0	1
BCKDHB	chr6	80878040	80878064	rs370386196	80878051	G	C	0.00177786	GGGGAGAGGGAAGAAGGGAGAGGGG	GGGGAGAGGGAACAAGGGAGAGGGG	0	1
GPC6	chr13	94085981	94086012	rs146111988	94085991	G	A	0.00179712	GGGGCTGCTGGGCTATGGTGGGTTTTCCAGGG	GGGGCTGCTGGACTATGGTGGGTTTTCCAGGG	0	1
ESRRB	chr14	76932520	76932549	rs73320319	76932541	G	A	0.00200893	GGGGGGCTTTGGGGGTCCAGGGGCTTGGGG	GGGGGGCTTTGGGGGTCCAGGGACTTGGGG	0	1
CLCN1	chr7	143042919	143042941	rs79676638	143042920	G	A	0.00204421	GGGCTGGGCTGGGCTGGGCTGGG	GGACTGGGCTGGGCTGGGCTGGG	0	1
EPB41L1	chr20	34765985	34766004	rs77545213	34765994	G	A	0.00214282	GGGCTAGGGAGCAGGGTGGG	GGGCTAGGGAACAGGGTGGG	0	1
HGSNAT	chr8	43036348	43036368	rs192987106	43036351	G	C	0.00228311	GGGAGAGGGAGAGGGAGAGGG	GGGACAGGGAGAGGGAGAGGG	0	1
AP1S1	chr7	100798653	100798682	rs61414985	100798657	G	A	0.00232558	GGGAAGCTGGGGTACACTGGGCAGTGAGGG	GGGAAACTGGGGTACACTGGGCAGTGAGGG	0	1
GPR56	chr16	57694432	57694459	rs145408651	57694448	G	A	0.00235939	GGGGCCCCCAGGGTGACGAAGGGCAGGG	GGGGCCCCCAGGGTGACAAAGGGCAGGG	0	1
ZBTB38	chr3	141120996	141121020	rs550423959	141121010	C	A	0.00242982	GGGTCGGGCATGGGGCCTTACGGGG	GGGTCGGGCATGGGGACTTACGGGG	0	1
HK1	chr10	71076042	71076067	rs370021550	71076044	C	A	0.00279553	GGGCCATGAAGGGATTTAGGGAAGGG	GGGACATGAAGGGATTTAGGGAAGGG	0	1
RYR1	chr19	38993388	38993413	rs768539259	38993394	G	A	0.00287356	GGGTGGGGCAGGGGCAGGGGCAGGGG	GGGTGGGACAGGGGCAGGGGCAGGGG	0	1
WFS1	chr4	6279445	6279476	rs71524366	6279458	T	C	0.00290484	GGGATGTTCAGGGATAGCTGGGTGGGAACGGG	GGGATGTTCAGGGACAGCTGGGTGGGAACGGG	0	1
AGRN	chr1	969636	969667	rs1218933517	969647	G	A	0.00333333	GGGAGGCTGTGGGCAGCAGGGGTGGCTGCGGG	GGGAGGCTGTGGACAGCAGGGGTGGCTGCGGG	0	1
TGFB2	chr1	218574185	218574216	rs141017828	218574211	T	C	0.00333333	GGGCGGGCCAGGGAAGGCAGGGTGAGATTGGG	GGGCGGGCCAGGGAAGGCAGGGTGAGACTGGG	0	1
EIF2B5	chr3	184049611	184049634	rs757768380	184049623	G	A	0.003977	GGGAGATGGAGGGGCAAGGGTGGG	GGGAGATGGAGGGACAAGGGTGGG	0	1
EPHB2	chr1	23152174	23152201	rs148809790	23152190	G	A	0.00406154	GGGAGCCAGGGGCTAGGGCCACCCTGGG	GGGAGCCAGGGGCTAGGACCACCCTGGG	0	1
SLC6A5	chr11	20626002	20626033	rs985404448	20626013	G	A	0.004196	GGGGCGGGGCGGGCACCTGAGGGTTGGGTGGG	GGGGCGGGGCGGACACCTGAGGGTTGGGTGGG	0	1
SH3BP2	chr4	2811951	2811974	rs1040108695	2811957	T	C	0.00462963	GGGAAGATAGGGTTGGGGAAGGGG	GGGAAGACAGGGTTGGGGAAGGGG	0	1
ARHGAP26	chr5	142240711	142240741	rs1561968770	142240723	G	A	0.00462963	GGGGAGGCGGGGAGCCTGGGGATTTCGTGGG	GGGGAGGCGGGGAACCTGGGGATTTCGTGGG	0	1
POU6F2	chr7	39347875	39347904	rs1562784702	39347893	G	A	0.00462963	GGGCAGTGTTGGGGTGGGGGCACGGATGGG	GGGCAGTGTTGGGGTGGGGACACGGATGGG	0	1
DPP6	chr7	154491499	154491522	rs1451793902	154491506	C	T	0.0046729	GGGCAGGGCGACCTTGGGTCAGGG	GGGCAGGGTGACCTTGGGTCAGGG	0	1
DPP6	chr7	154477147	154477168	rs371514914	154477153	G	A	0.00471698	GGGTGGGGCCTGGGCGTCAGGG	GGGTGGGACCTGGGCGTCAGGG	0	1
ZBTB38	chr3	141120996	141121020	rs750037098	141121009	G	A	0.005	GGGTCGGGCATGGGGCCTTACGGGG	GGGTCGGGCATGGGACCTTACGGGG	0	1
GPR56	chr16	57655399	57655426	rs11864564	57655419	G	C	0.00666667	GGGTGTGTATGGGTGTAGGGAGTGGGGG	GGGTGTGTATGGGTGTAGGGACTGGGGG	0	1
RNASEH2B	chr13	51518157	51518188	rs113888759	51518180	G	A	0.00690124	GGGACGGACGGGACGTGATGGGACGGGACGGG	GGGACGGACGGGACGTGATGGGACAGGACGGG	0	1
ACAD9	chr3	128621722	128621743	rs62268194	128621737	T	C	0.00726518	GGGGTGGGGATGGGGATTGGGG	GGGGTGGGGATGGGGACTGGGG	0	1
ESPN	chr1	6500089	6500110	rs146827363	6500090	G	A	0.0073558	GGGCAGGGCAGTGCTGGGTGGG	GGACAGGGCAGTGCTGGGTGGG	0	1
COL18A1	chr21	46906714	46906745	rs974206635	46906734	G	A	0.008262	GGGGTTGCAGGGCCAGCGGGGGCTGGGCTGGG	GGGGTTGCAGGGCCAGCGGGGACTGGGCTGGG	0	1
MESP2	chr15	90320146	90320167	rs113097169	90320160	G	A	0.00845666	GGGGCAGGGGCAAGGGCAGGGG	GGGGCAGGGGCAAGGACAGGGG	0	1
ARHGAP26	chr5	142415091	142415120	rs13159761	142415096	G	A	0.00982143	GGGGACGTGGGGGAAAGGATGGGAAGGGGG	GGGGACATGGGGGAAAGGATGGGAAGGGGG	0	1
CDHR1	chr10	85965929	85965948	rs12217214	85965930	G	A	0.01	GGGCATTGGGTGGGTGGGGG	GGACATTGGGTGGGTGGGGG	0	1
POLH	chr6	43562678	43562708	rs9333532	43562681	G	A	0.0115171	GGGGGCTGGGGAGGTGGGGGGCATATGGGGG	GGGGACTGGGGAGGTGGGGGGCATATGGGGG	0	1
CFD	chr19	862360	862382	rs116451501	862367	G	A	0.0169738	GGGTTGGGGCATGAGGGGCAGGG	GGGTTGGGACATGAGGGGCAGGG	0	1
HGSNAT	chr8	43036276	43036296	rs1310974797	43036279	G	C	0.02	GGGAGAGGGAGAGGGAGAGGG	GGGACAGGGAGAGGGAGAGGG	0	1
SPECC1L	chr22	24692638	24692663	rs151315572	24692643	G	A	0.0233626	GGGGGGGCTCTAGAGGGGCTCTAGGG	GGGGGGACTCTAGAGGGGCTCTAGGG	0	1
EPO	chr7	100320219	100320246	rs7789679	100320220	G	A	0.0269752	GGGCTGCTGAGGGGCAGGAGGGAGAGGG	GGACTGCTGAGGGGCAGGAGGGAGAGGG	0	1
TENM3	chr4	183373484	183373503	rs12502660	183373489	G	A	0.0350593	GGGGACGGGGGGCGGGGGGG	GGGGACAGGGGGCGGGGGGG	0	1
SLC6A2	chr16	55731945	55731970	rs746826564	55731960	T	A	0.039788	GGGGCTGGGCTCTGGGTCACCTGGGG	GGGGCTGGGCTCTGGGACACCTGGGG	0	1
CNNM4	chr2	97426828	97426852	rs1452851536	97426838	G	A	0.049847	GGGCGCTGGGGGCCCGGGGCCAGGG	GGGCGCTGGGGACCCGGGGCCAGGG	0	1
F2	chr11	46740904	46740927	rs1265104134	46740912	G	A	0.049959	GGGGTGTGGGCCCATGGGCTGGGG	GGGGTGTGGACCCATGGGCTGGGG	0	1
JPH3	chr16	87656506	87656534	rs112074424	87656517	G	A	0.0511182	GGGTATGAGAGGGCCCTGGGGTCCCAGGG	GGGTATGAGAGGACCCTGGGGTCCCAGGG	0	1
EPHX1	chr1	226016626	226016643	rs3738047	226016632	G	A	0.0612848	GGGCCGGGCCGGGCTGGG	GGGCCGGACCGGGCTGGG	0	1
ESPN	chr1	6500510	6500539	rs1226654258	6500511	G	A	0.069015	GGGCCCGGGCGGGGAGCAGGGGAGGCGGGG	GGACCCGGGCGGGGAGCAGGGGAGGCGGGG	0	1
CETP	chr16	57006007	57006023	rs777945144	57006017	G	A	0.080075	GGGAGGGTGGGGCAGGG	GGGAGGGTGGGACAGGG	0	1
SYNGAP1	chr6	33408763	33408790	rs771036493	33408779	G	A	0.081608	GGGCAGGGCAGGGAGTGGCAGGGCAGGG	GGGCAGGGCAGGGAGTGACAGGGCAGGG	0	1
FERMT3	chr11	63987807	63987831	rs754855391	63987825	G	A	0.083131	GGGCTGGGCAGGGGCCAGGGCCGGG	GGGCTGGGCAGGGGCCAGGACCGGG	0	1
NTRK1	chr1	156821272	156821301	rs781691038	156821282	G	A	0.083552	GGGTCTGTGGGGCAAGGGGGCTGAATGGGG	GGGTCTGTGGGACAAGGGGGCTGAATGGGG	0	1
COL4A2	chr13	111077080	111077110	rs774623979	111077091	G	A	0.084641	GGGTCAGCCTGGGCCAGTGGGCCCCCAGGGG	GGGTCAGCCTGGACCAGTGGGCCCCCAGGGG	0	1
NDUFAF6	chr8	96021739	96021764	rs73276406	96021759	G	C	0.087963	GGGTCAGTGGGTTATGGGAGAGAGGG	GGGTCAGTGGGTTATGGGAGACAGGG	0	1
COX10	chr17	14078391	14078414	rs56731858	14078396	T	C	0.0923567	GGGAAATAGCGGGGGGGGGGGGGG	GGGAAACAGCGGGGGGGGGGGGGG	0	1
FSCN2	chr17	79496540	79496563	rs1555670893	79496556	C	A	0.093704	GGGTGTAGGTGGGTGGGCCTCGGG	GGGTGTAGGTGGGTGGGACTCGGG	0	1
NDUFA13	chr19	19627176	19627200	rs759838752	19627186	G	A	0.096811	GGGCACTCGGGGCTCGGGGGCGGGG	GGGCACTCGGGACTCGGGGGCGGGG	0	1
LRTOMT	chr11	71809303	71809325	rs760963712	71809308	G	A	0.099982	GGGTGGGCAGGGGCAGGTGAGGG	GGGTGGACAGGGGCAGGTGAGGG	0	1
POLD1	chr19	50905798	50905825	rs1379780272	50905809	G	A	0.10353	GGGCTTCCCAGGGCAGGGCTGGGTGGGG	GGGCTTCCCAGGACAGGGCTGGGTGGGG	0	1
LRP5	chr11	68154178	68154202	rs4988319	68154187	G	A	0.115415	GGGGTAAGACGGGCGGGGGCTGGGG	GGGGTAAGACAGGCGGGGGCTGGGG	0	1
EIF2B5	chr3	184002900	184002922	rs1334689114	184002904	G	A	0.12073	GGGTAGCCCAGGGTGAGGGTGGG	GGGTAACCCAGGGTGAGGGTGGG	0	1
FLNC	chr7	128486243	128486273	rs766313813	128486262	G	A	0.12151	GGGCAGGGCTGGGCAAGTGGGCAGGGCCGGG	GGGCAGGGCTGGGCAAGTGGACAGGGCCGGG	0	1
SMARCA4	chr19	11152251	11152283	rs768739925	11152263	G	A	0.12412	GGGGAGGGCGGGGGCTGTAGGGGTCCCCGTGGG	GGGGAGGGCGGGGACTGTAGGGGTCCCCGTGGG	0	1
GJC2	chr1	228346799	228346825	rs1221415068	228346800	G	A	0.12509	GGGCCAGGGAGGAGGAGGGTTGGGGGG	GGACCAGGGAGGAGGAGGGTTGGGGGG	0	1
LRP5	chr11	68207389	68207417	rs1383694855	68207396	G	A	0.14292	GGGGCGGGGCCGGGGAGGGGCGGGGCGGG	GGGGCGGGACCGGGGAGGGGCGGGGCGGG	0	1
COL18A1	chr21	46876544	46876568	rs1305050267	46876551	G	A	0.14566	GGGCCGGGGCACGGGCGTGGGGGGG	GGGCCGGGACACGGGCGTGGGGGGG	0	1
RYR1	chr19	39018686	39018704	rs1210455968	39018692	G	A	0.16152	GGGCAGGGCCTTGGGTGGG	GGGCAGGACCTTGGGTGGG	0	1
FERMT3	chr11	63987138	63987164	rs768788260	63987147	G	A	0.16547	GGGGCTCAGGGCAGGGGCTGGGCAGGG	GGGGCTCAGGACAGGGGCTGGGCAGGG	0	1
CTNNB1	chr3	41288377	41288397	rs754342213	41288384	G	A	0.16571	GGGCTGGGGCCACAGGGCGGG	GGGCTGGGACCACAGGGCGGG	0	1
CABP4	chr11	67223280	67223303	rs1266108893	67223289	T	A	0.20097	GGGCTGGGGGTCCTGGGGGTGGGG	GGGCTGGGGGACCTGGGGGTGGGG	0	1
GNMT	chr6	42930955	42930984	rs776271853	42930957	G	A	0.24502	GGGGCCCTCTGGGGTGGGGGTGGGGGTGGG	GGGACCCTCTGGGGTGGGGGTGGGGGTGGG	0	1
RUNX2	chr6	45513041	45513068	rs1355476175	45513062	G	A	0.27297	GGGCTGGGCAGGGCTGGGCTGGGCTGGG	GGGCTGGGCAGGGCTGGGCTGGACTGGG	0	1
GPR56	chr16	57644846	57644872	rs1224889441	57644854	G	A	0.31837	GGGCTGAGGGCAGGCAAGGGCCAGGGG	GGGCTGAGGACAGGCAAGGGCCAGGGG	0	1
ZBTB38	chr3	141148784	141148808	rs1389300222	141148785	G	A	0.31837	GGGCCTTGCTGGGCACTGGGAAGGG	GGACCTTGCTGGGCACTGGGAAGGG	0	1
GPI	chr19	34869949	34869970	rs1568335021	34869958	G	C	0.31839	GGGCTGGGAAGAGCAGGGTGGG	GGGCTGGGAACAGCAGGGTGGG	0	1
CDH23	chr10	73213556	73213578	rs941362376	73213569	G	A	0.31839	GGGGCTAAAGGGACGGGGATGGG	GGGGCTAAAGGGACAGGGATGGG	0	1
CACNA1C	chr12	2642213	2642239	rs987896616	2642214	G	A	0.31839	GGGCAAAGAGGGAGGAGGGATGAAGGG	GGACAAAGAGGGAGGAGGGATGAAGGG	0	1
EGF	chr4	110839917	110839941	rs1244432037	110839928	G	A	0.31841	GGGAGGGTTGGGGCAAGGGCAGGGG	GGGAGGGTTGGGACAAGGGCAGGGG	0	1
PEX26	chr22	18572111	18572136	rs1249834768	18572133	G	A	0.31841	GGGATGTGGGGGGCGGGGCAGACGGG	GGGATGTGGGGGGCGGGGCAGACAGG	0	1
RYR1	chr19	38996595	38996617	rs1293635369	38996610	G	A	0.31902	GGGGCCTGGGTGGAGGGCAGGGG	GGGGCCTGGGTGGAGGACAGGGG	0	1
KCNQ4	chr1	41267685	41267706	rs1261903976	41267699	G	A	0.31904	GGGAGGGGGAAGGGGGCTTGGG	GGGAGGGGGAAGGGGACTTGGG	0	1
RET	chr10	43614267	43614296	rs1276675916	43614277	T	A	0.31904	GGGTACTAGGGTACCCTGGGTACCACAGGG	GGGTACTAGGGAACCCTGGGTACCACAGGG	0	1
GATAD1	chr7	92076955	92076986	rs1156777835	92076958	G	C	0.31953	GGGAGTGGCGGGCCGACCAGGGGGCGGCCGGG	GGGACTGGCGGGCCGACCAGGGGGCGGCCGGG	0	1
PADI4	chr1	17683264	17683290	rs898257067	17683270	G	A	0.31953	GGGGTTGGCTGGGCAAACGGGGCAGGG	GGGGTTGACTGGGCAAACGGGGCAGGG	0	1
POR	chr7	75596977	75597005	rs1000792799	75596983	G	A	0.32113	GGGAAACGGGGAGGGCGTGGGGAGAAGGG	GGGAAACAGGGAGGGCGTGGGGAGAAGGG	0	1
DOK7	chr4	3501670	3501694	rs1227810060	3501672	C	A	0.32113	GGGCCTTGGGGGGCCCATGGGGGGG	GGGACTTGGGGGGCCCATGGGGGGG	0	1
MUC5B	chr11	1274327	1274359	rs1190161514	1274339	G	A	0.32281	GGGGCATGGTGGGGCATGGTGGGGTGCAGTGGG	GGGGCATGGTGGGACATGGTGGGGTGCAGTGGG	0	1
CYLD	chr16	50776078	50776101	rs1399343195	50776082	G	C	0.32396	GGGACGCGGGCTGGGGAGCCGGGG	GGGACCCGGGCTGGGGAGCCGGGG	0	1
IFT43	chr14	76392407	76392431	rs964595704	76392415	G	A	0.32396	GGGCCGTGGGCCGTGGGCCGTGGGG	GGGCCGTGGACCGTGGGCCGTGGGG	0	1
IFT43	chr14	76448993	76449021	rs1483465568	76449005	G	A	0.32533	GGGAGCCGGGGAGGCTCGGGGGCTGGGGG	GGGAGCCGGGGAGACTCGGGGGCTGGGGG	0	1
AIRE	chr21	45713168	45713197	rs1437256517	45713173	C	A	0.32858	GGGAGGCACAGGGCCTGGGGCTGTGGGGGG	GGGAGGAACAGGGCCTGGGGCTGTGGGGGG	0	1
ANTXR1	chr2	69405692	69405714	rs1045964913	69405705	G	A	0.33465	GGGAGGGGCCAGGGGCAAGAGGG	GGGAGGGGCCAGGGACAAGAGGG	0	1
SEPN1	chr1	26127063	26127086	rs947775879	26127074	C	A	0.33465	GGGTGGGGGGTGCCTGGGGCCGGG	GGGTGGGGGGTGACTGGGGCCGGG	0	1
SQSTM1	chr5	179233888	179233920	rs1482408421	179233894	G	A	0.34887	GGGCCGGGCCGGGCCGGGCTGGGCTGGGCTGGG	GGGCCGGACCGGGCCGGGCTGGGCTGGGCTGGG	0	1
MYCN	chr2	16082660	16082686	rs1312785959	16082678	G	A	0.38238	GGGTCGCGGGCACGGCGGGGCTGCGGG	GGGTCGCGGGCACGGCGGGACTGCGGG	0	1
GLI2	chr2	121709029	121709058	rs756762058	121709048	G	A	0.38276	GGGTGTGGGGATGGGGAGGGGCAGCTAGGG	GGGTGTGGGGATGGGGAGGGACAGCTAGGG	0	1
RNF213	chr17	78248411	78248443	rs28377805	78248425	T	A	0.382812	GGGGTGAGTGGGGTGTCTGTGGGGGGTGTGGGG	GGGGTGAGTGGGGTGACTGTGGGGGGTGTGGGG	0	1
SCNN1G	chr16	23224093	23224123	rs1302504620	23224102	G	A	0.397716	GGGGTGAGACGGGTGGCTGGGTTGGGTTGGG	GGGGTGAGACAGGTGGCTGGGTTGGGTTGGG	0	1
SLC34A1	chr5	176823876	176823898	rs780901722	176823882	G	A	0.397902	GGGGTGGGCCAGGGCTGGCAGGG	GGGGTGGACCAGGGCTGGCAGGG	0	1
BCKDK	chr16	31121669	31121697	rs1567428853	31121690	G	A	0.398175	GGGCCTGCTGGGGGTGGGAAGGGCACGGG	GGGCCTGCTGGGGGTGGGAAGGACACGGG	0	1
PNKD	chr2	219142048	219142072	rs750878182	219142060	G	A	0.398651	GGGGAGTCGGGGGGCCAGGGAAGGG	GGGGAGTCGGGGGACCAGGGAAGGG	0	1
IRF8	chr16	85948131	85948159	rs781211274	85948147	G	C	0.398769	GGGGTGGTCCGGGCTGAGAGGGGCGTGGG	GGGGTGGTCCGGGCTGACAGGGGCGTGGG	0	1
PNPLA6	chr19	7607817	7607844	rs1464823174	7607831	G	A	0.398988	GGGCAGCCGAGGGGAGCTGGGCACAGGG	GGGCAGCCGAGGGGAACTGGGCACAGGG	0	1
EIF2B5	chr3	184008473	184008495	rs946114262	184008475	G	A	0.399383	GGGGCTGGGTGCTGGGGCCTGGG	GGGACTGGGTGCTGGGGCCTGGG	0	1
EIF2B5	chr3	184008473	184008495	rs981974256	184008488	G	A	0.399786	GGGGCTGGGTGCTGGGGCCTGGG	GGGGCTGGGTGCTGGGACCTGGG	0	1
GUCY2D	chr17	7915701	7915724	rs775878637	7915717	G	C	0.399811	GGGGGCAGGGATGGGGAGCAAGGG	GGGGGCAGGGATGGGGACCAAGGG	0	1
ZAP70	chr2	98350065	98350091	rs897858343	98350080	G	A	0.399933	GGGCAGAGGTGGGGACGCGGGTTGGGG	GGGCAGAGGTGGGGACACGGGTTGGGG	0	1
AMHR2	chr12	53819366	53819391	rs1415205959	53819373	G	C	0.400166	GGGAGGGAGAGAAGGGCTCCTCTGGG	GGGAGGGACAGAAGGGCTCCTCTGGG	0	1
VEGFA	chr6	43745405	43745435	rs777920401	43745406	G	A	0.400525	GGGCATCTTTGGGAAGTGGGGCAAGGGGGGG	GGACATCTTTGGGAAGTGGGGCAAGGGGGGG	0	1
PNPLA2	chr11	822055	822076	rs1476366396	822061	G	A	0.400853	GGGGTGGGCCGTGGGATGAGGG	GGGGTGGACCGTGGGATGAGGG	0	1
FERMT3	chr11	63987807	63987831	rs779472064	63987819	G	A	0.400876	GGGCTGGGCAGGGGCCAGGGCCGGG	GGGCTGGGCAGGGACCAGGGCCGGG	0	1
PEX3	chr6	143772275	143772299	rs749677512	143772287	G	C	0.401645	GGGGGCATTGGGAGAAGGGGGTGGG	GGGGGCATTGGGACAAGGGGGTGGG	0	1
GAD1	chr2	171675221	171675248	rs766712707	171675225	G	C	0.401942	GGGAAGATGGGGGCGCTGGGACGTCGGG	GGGAACATGGGGGCGCTGGGACGTCGGG	0	1
PRCD	chr17	74538719	74538743	rs1303543618	74538720	G	A	0.402583	GGGCAGGGCTGGGAGCCGGGGAGGG	GGACAGGGCTGGGAGCCGGGGAGGG	0	1
AP5Z1	chr7	4826068	4826094	rs748944609	4826087	G	A	0.404116	GGGCATCCCTGGGTGCCAGGGCAGGGG	GGGCATCCCTGGGTGCCAGGACAGGGG	0	1
BCAM	chr19	45322145	45322174	rs776409244	45322148	G	A	0.404734	GGGGGCAGGGAGGGGGTGGGCTTGGATGGG	GGGGACAGGGAGGGGGTGGGCTTGGATGGG	0	1
FLNC	chr7	128486243	128486273	rs969418993	128486244	G	A	0.405226	GGGCAGGGCTGGGCAAGTGGGCAGGGCCGGG	GGACAGGGCTGGGCAAGTGGGCAGGGCCGGG	0	1
WDR81	chr17	1637089	1637112	rs764597183	1637105	G	A	0.405321	GGGGGTGGGTGGCGGGGGCCTGGG	GGGGGTGGGTGGCGGGGACCTGGG	0	1
SLC39A13	chr11	47436749	47436776	rs1175502159	47436750	G	A	0.408807	GGGCCCTTAGGGGCTCAGGAGGGAAGGG	GGACCCTTAGGGGCTCAGGAGGGAAGGG	0	1
SIX6	chr14	60977826	60977848	rs766404727	60977838	G	A	0.409755	GGGTTCCGGGCGGGCACTACGGG	GGGTTCCGGGCGGACACTACGGG	0	1
INF2	chr14	105178897	105178922	rs770255555	105178906	G	A	0.409786	GGGCACCTGGGCCTGGGGCTGGCGGG	GGGCACCTGGACCTGGGGCTGGCGGG	0	1
GLYCTK	chr3	52328377	52328402	rs1559468894	52328389	C	A	0.412817	GGGTGTGGAGGGGCCCTGGGCCAGGG	GGGTGTGGAGGGGACCTGGGCCAGGG	0	1
GRK1	chr13	114322282	114322308	rs779008910	114322299	G	A	0.413623	GGGTCCTAGGGAAAGGGGGCTTCGGGG	GGGTCCTAGGGAAAGGGGACTTCGGGG	0	1
EIF2B5	chr3	183904453	183904480	rs749187013	183904456	G	C	0.414422	GGGAGTAGGGGTTGATGGGGGCGAAGGG	GGGACTAGGGGTTGATGGGGGCGAAGGG	0	1
ZAP70	chr2	98351639	98351668	rs1193410783	98351662	G	A	0.415234	GGGTGGGTGGGGGTGTGGGGCCGAGCAGGG	GGGTGGGTGGGGGTGTGGGGCCGAACAGGG	0	1
CDH23	chr10	73569843	73569872	rs751019592	73569855	G	A	0.416469	GGGCCCACCCGGGGCCGGGGCAGTGGAGGG	GGGCCCACCCGGGACCGGGGCAGTGGAGGG	0	1
SORL1	chr11	121475050	121475077	rs948190621	121475051	G	A	0.416517	GGGCTGGGCTGGGCTGGGCTGGGCTGGG	GGACTGGGCTGGGCTGGGCTGGGCTGGG	0	1
ADAMTSL4	chr1	150526403	150526430	rs920060868	150526404	G	A	0.416691	GGGCCAAGGGCCTTGGGGAACGGGGGGG	GGACCAAGGGCCTTGGGGAACGGGGGGG	0	1
WNK4	chr17	40934968	40934989	rs753778740	40934983	G	A	0.418711	GGGTGGGGAGAGGGAGGCTGGG	GGGTGGGGAGAGGGAGACTGGG	0	1
DYSF	chr2	71838488	71838509	rs753546942	71838503	G	A	0.41997	GGGCCTGGGCGTGGGGGCTGGG	GGGCCTGGGCGTGGGGACTGGG	0	1
PLOD1	chr1	12025473	12025497	rs1490650936	12025486	G	A	0.420087	GGGGAGGGGTGAGGGCAGGGGAGGG	GGGGAGGGGTGAGGACAGGGGAGGG	0	1
SYNGAP1	chr6	33405796	33405825	rs1481677705	33405801	T	C	0.422837	GGGGGATCTGGGGGCATGGGTTCGGGAGGG	GGGGGACCTGGGGGCATGGGTTCGGGAGGG	0	1
LFNG	chr7	2566412	2566435	rs1399696024	2566419	G	A	0.423395	GGGGCGGGGCCCAGGGATGTCGGG	GGGGCGGGACCCAGGGATGTCGGG	0	1
CD81	chr11	2415450	2415470	rs1483474956	2415451	G	A	0.423567	GGGCCGGGGAGGGGCTGGGGG	GGACCGGGGAGGGGCTGGGGG	0	1
RFXANK	chr19	19308449	19308480	rs752975115	19308471	G	A	0.429553	GGGCAGCTGGGGGGTTCCCGGGGGCCTTAGGG	GGGCAGCTGGGGGGTTCCCGGGGACCTTAGGG	0	1
SLC25A38	chr3	39425289	39425316	rs763575954	39425309	G	A	0.43198	GGGCACTGCGGGGAAGGAAGGGCAGGGG	GGGCACTGCGGGGAAGGAAGGACAGGGG	0	1
COL6A2	chr21	47531512	47531536	rs1247271994	47531528	G	A	0.435707	GGGGTCGGGGGCCGGGGGCTCTGGG	GGGGTCGGGGGCCGGGGACTCTGGG	0	1
EIF2B5	chr3	184290983	184291010	rs781644588	184291004	C	A	0.437017	GGGGAAAGGGTTGTCGGGAGGGCCTGGG	GGGGAAAGGGTTGTCGGGAGGGACTGGG	0	1
TRIOBP	chr22	38130696	38130725	rs762067707	38130707	C	A	0.437495	GGGAGGCCTGGGCCCTGGGGGCTGGTGGGG	GGGAGGCCTGGGACCTGGGGGCTGGTGGGG	0	1
APOC4-APOC2	chr19	45448152	45448175	rs368881819	45448162	G	A	0.451182	GGGTGTGCTGGGCTGGGTGGTGGG	GGGTGTGCTGGACTGGGTGGTGGG	0	1
EIF2B5	chr3	183882993	183883017	rs778613714	183883002	T	A	0.451761	GGGTATGGGGTCTGGGAGGCTAGGG	GGGTATGGGGACTGGGAGGCTAGGG	0	1
LTBP4	chr19	41116562	41116589	rs1224505394	41116580	G	A	0.469859	GGGTGAGGGCCTGGGAGGGGCAGCTGGG	GGGTGAGGGCCTGGGAGGGACAGCTGGG	0	1
COL4A2	chr13	111156295	111156323	rs772670950	111156308	G	C	0.474077	GGGGCACCGGGGGAGATGGGGCCCCAGGG	GGGGCACCGGGGGACATGGGGCCCCAGGG	0	1
TCIRG1	chr11	67810981	67811007	rs775280485	67811002	G	C	0.476708	GGGCTGGGGGGTCCTGGGCAGAGCGGG	GGGCTGGGGGGTCCTGGGCAGACCGGG	0	1
FERMT3	chr11	63986840	63986866	rs777822530	63986849	G	A	0.49232	GGGCCTGGGGGCACCAGGGCAGGTGGG	GGGCCTGGGGACACCAGGGCAGGTGGG	0	1
CLPP	chr19	6361812	6361833	rs367866275	6361822	G	A	0.517213	GGGGGCTCCGGGCTGGGTGGGG	GGGGGCTCCGGACTGGGTGGGG	0	1
TUBB3	chr16	89989894	89989915	rs764839451	89989895	G	A	0.55371	GGGCCCCGGGGCGGGAGGAGGG	GGACCCCGGGGCGGGAGGAGGG	0	1
PDE6B	chr4	648008	648036	rs1560118847	648025	T	C	0.556886	GGGCAGGAGAGGGAGGGATAGGGGTGGGG	GGGCAGGAGAGGGAGGGACAGGGGTGGGG	0	1
KMT2A	chr11	118307428	118307457	rs1555138622	118307440	G	A	0.581024	GGGAAGCAGCGGGGCTGGGGTTCCAGGGGG	GGGAAGCAGCGGGACTGGGGTTCCAGGGGG	0	1
BMP1	chr8	22023094	22023125	rs1394591651	22023096	C	A	0.619886	GGGCCAGGCGGGGAGGCGCGGGCGGGTTCGGG	GGGACAGGCGGGGAGGCGCGGGCGGGTTCGGG	0	1
COL18A1	chr21	46842501	46842529	rs746007237	46842510	G	A	0.63804	GGGTCTCAGGGCACAGTGGGTGGCACGGG	GGGTCTCAGGACACAGTGGGTGGCACGGG	0	1
STIM1	chr11	4076899	4076924	rs1211888000	4076913	G	A	0.650263	GGGTACGGGGAATGGGCTGGAGTGGG	GGGTACGGGGAATGGACTGGAGTGGG	0	1
RSPH9	chr6	43640131	43640157	rs926960097	43640149	C	A	0.670017	GGGAATCAAGGGGTAAGGGCCCGTGGG	GGGAATCAAGGGGTAAGGGACCGTGGG	0	1
SERPING1	chr11	57365811	57365837	rs1236831214	57365822	G	A	0.674027	GGGATGGGGGACGGGGGTGGAGACGGG	GGGATGGGGGACAGGGGTGGAGACGGG	0	1
LTBP4	chr19	41119493	41119520	rs370394806	41119497	G	T	0.678785	GGGACGGGGAGAAGAGGGCGAAAAGGGG	GGGACTGGGAGAAGAGGGCGAAAAGGGG	0	1
EIF2B5	chr3	183895414	183895435	rs1274917541	183895429	G	A	0.744336	GGGTCACTGTGGGAGGGCAGGG	GGGTCACTGTGGGAGGACAGGG	0	1
DOK7	chr4	3502355	3502375	rs1055069708	3502369	G	A	0.746793	GGGCAGGGTCACAGGGCTGGG	GGGCAGGGTCACAGGACTGGG	0	1
ESPN	chr1	6500510	6500539	rs1487396607	6500524	G	A	0.780116	GGGCCCGGGCGGGGAGCAGGGGAGGCGGGG	GGGCCCGGGCGGGGAACAGGGGAGGCGGGG	0	1
GAD1	chr2	171679350	171679374	rs1004878803	171679366	G	C	0.796381	GGGAAGGGAAAGGGGACGAGCAGGG	GGGAAGGGAAAGGGGACCAGCAGGG	0	1
CEP135	chr4	56815299	56815322	rs1010819976	56815300	G	A	0.796381	GGGCCGGGCTCGGGCACTGCCGGG	GGACCGGGCTCGGGCACTGCCGGG	0	1
CD151	chr11	834749	834776	rs1011848796	834754	G	A	0.796381	GGGCGGGCACGGGGCATCTGGGGAGGGG	GGGCGGACACGGGGCATCTGGGGAGGGG	0	1
RPS19	chr19	42364542	42364574	rs1011957416	42364553	G	A	0.796381	GGGCCCCGGGGGGCAGCGGCGGGGTGCGTGGGG	GGGCCCCGGGGGACAGCGGCGGGGTGCGTGGGG	0	1
PHKB	chr16	47503512	47503541	rs1012910578	47503530	G	A	0.796381	GGGAGAGTGAGGGAGAGGGGCAGGGCAGGG	GGGAGAGTGAGGGAGAGGGACAGGGCAGGG	0	1
DAGLA	chr11	61486273	61486294	rs1013888408	61486277	T	C	0.796381	GGGGATAGGGAGGCGGGCCGGG	GGGGACAGGGAGGCGGGCCGGG	0	1
ARHGAP31	chr3	119087791	119087813	rs1014192834	119087801	G	C	0.796381	GGGTGGGTAGAGAGGGGAGAGGG	GGGTGGGTAGACAGGGGAGAGGG	0	1
PDE6B	chr4	655767	655794	rs1014399738	655773	G	A	0.796381	GGGAAACGCAGGGATGGGGAAGATCGGG	GGGAAACACAGGGATGGGGAAGATCGGG	0	1
CRADD	chr12	94278294	94278317	rs1015100522	94278301	G	A	0.796381	GGGAGGACGGGGTGGGGCCTCGGG	GGGAGGACAGGGTGGGGCCTCGGG	0	1
CNTNAP2	chr7	147015745	147015774	rs1016958679	147015766	G	A	0.796381	GGGGCCTATCGGGAGGTGGGGGGCAAGGGG	GGGGCCTATCGGGAGGTGGGGGACAAGGGG	0	1
KALRN	chr3	123859642	123859664	rs1018894787	123859648	G	A	0.796381	GGGGGGGGCACAGGGAGTAGGGG	GGGGGGGACACAGGGAGTAGGGG	0	1
LDB3	chr10	88440592	88440617	rs1020665956	88440608	G	A	0.796381	GGGGCAGATTGGGCAGGGCAGTGGGG	GGGGCAGATTGGGCAGGACAGTGGGG	0	1
IFT43	chr14	76456958	76456981	rs1024611286	76456960	G	A	0.796381	GGGGCCTGGGGCAGGGAGGTTGGG	GGGACCTGGGGCAGGGAGGTTGGG	0	1
CACNA1H	chr16	1245345	1245371	rs1024803526	1245348	G	A	0.796381	GGGGGCCGGGCTCTTGCGGGGCTGGGG	GGGGACCGGGCTCTTGCGGGGCTGGGG	0	1
CTNNB1	chr3	41286077	41286094	rs1025778370	41286083	G	A	0.796381	GGGGAGGGCAGGGAAGGG	GGGGAGGACAGGGAAGGG	0	1
WNT10A	chr2	219760487	219760512	rs1027420929	219760506	G	A	0.796381	GGGGTGGGTGGTTGGGTGGGGCAGGG	GGGGTGGGTGGTTGGGTGGGACAGGG	0	1
RPS7	chr2	3623087	3623118	rs1027422070	3623098	G	A	0.796381	GGGGCGAGCGGGGCCTGGCCGGGGGGTGCGGG	GGGGCGAGCGGGACCTGGCCGGGGGGTGCGGG	0	1
SMARCB1	chr22	24164538	24164559	rs1027866826	24164539	G	A	0.796381	GGGCTGGGGAGGTGGGCAGGGG	GGACTGGGGAGGTGGGCAGGGG	0	1
PDE6B	chr4	643899	643923	rs1032807503	643911	G	A	0.796381	GGGGTGCTGGGACGCTGGGCACGGG	GGGGTGCTGGGACACTGGGCACGGG	0	1
DAGLA	chr11	61475337	61475360	rs1033744779	61475338	G	A	0.796381	GGGCTGGGCAGGGCGGGGTAGGGG	GGACTGGGCAGGGCGGGGTAGGGG	0	1
AQP1	chr7	30963272	30963299	rs1035349679	30963275	G	A	0.796381	GGGGGCAGGGGCAGGGGCGGGCGGAGGG	GGGGACAGGGGCAGGGGCGGGCGGAGGG	0	1
CAMTA1	chr1	7731620	7731648	rs1038423989	7731631	G	C	0.796381	GGGGCGGAGGGAGATGGGGTGGTGATGGG	GGGGCGGAGGGACATGGGGTGGTGATGGG	0	1
PAX7	chr1	19072124	19072147	rs1040374712	19072131	G	A	0.796381	GGGTAGGGGCACATGGGGGTGGGG	GGGTAGGGACACATGGGGGTGGGG	0	1
CDH23	chr10	73361694	73361721	rs1041052312	73361701	G	A	0.796381	GGGCCTGGGCTGGGTGGGCGGCGGAGGG	GGGCCTGGACTGGGTGGGCGGCGGAGGG	0	1
GNMT	chr6	42930955	42930984	rs1042612730	42930958	C	A	0.796381	GGGGCCCTCTGGGGTGGGGGTGGGGGTGGG	GGGGACCTCTGGGGTGGGGGTGGGGGTGGG	0	1
DPP6	chr7	153748917	153748940	rs1044570906	153748925	G	A	0.796381	GGGAGCTGGGCTGTGGAGGGAGGG	GGGAGCTGGACTGTGGAGGGAGGG	0	1
TCIRG1	chr11	67809501	67809525	rs1045010934	67809514	G	A	0.796381	GGGCCTAGGGCAGGGCTGGCTGGGG	GGGCCTAGGGCAGGACTGGCTGGGG	0	1
MLPH	chr2	238404920	238404945	rs1048383212	238404927	G	A	0.796381	GGGAGGGAGCAAGTGGGGCCTGGGGG	GGGAGGGAACAAGTGGGGCCTGGGGG	0	1
PDE6B	chr4	644747	644767	rs1055599800	644753	G	A	0.796381	GGGTGGGGCTGCTGGGCTGGG	GGGTGGGACTGCTGGGCTGGG	0	1
LOXL1	chr15	74226082	74226102	rs1156241859	74226084	G	A	0.796381	GGGGCAGGGAGGGAGCTGGGG	GGGACAGGGAGGGAGCTGGGG	0	1
CACNA1H	chr16	1203298	1203324	rs1156360891	1203301	G	C	0.796381	GGGAGCCGGGCGGGCTGGGGACGCGGG	GGGACCCGGGCGGGCTGGGGACGCGGG	0	1
LEPR	chr1	65886305	65886328	rs1156641993	65886311	G	A	0.796381	GGGGCGGGCTCGGGATCCGCGGGG	GGGGCGGACTCGGGATCCGCGGGG	0	1
ANTXR1	chr2	69441067	69441092	rs1157727898	69441079	G	A	0.796381	GGGCCAGTGTGGGGCATGGGAGGGGG	GGGCCAGTGTGGGACATGGGAGGGGG	0	1
PROC	chr2	128184109	128184135	rs1157825045	128184116	G	A	0.796381	GGGAGAGGGCTAGGAGGGAGGGCCGGG	GGGAGAGGACTAGGAGGGAGGGCCGGG	0	1
PGAP2	chr11	3837367	3837386	rs1158034608	3837369	T	A	0.796381	GGGTACTGTGGGCGGGAGGG	GGGAACTGTGGGCGGGAGGG	0	1
LAMA2	chr6	129468627	129468655	rs1158526842	129468634	G	A	0.796381	GGGCAGGGGCAATAAGGGGGTGGAGGGGG	GGGCAGGGACAATAAGGGGGTGGAGGGGG	0	1
DNAJB6	chr7	157209507	157209534	rs1158528532	157209514	G	A	0.796381	GGGTTAGGGCCATGCTGGGGAAAACGGG	GGGTTAGGACCATGCTGGGGAAAACGGG	0	1
NOS1AP	chr1	162082865	162082893	rs1158711774	162082876	T	C	0.796381	GGGTGGTGGGGATAGGGGGTTACTGAGGG	GGGTGGTGGGGACAGGGGGTTACTGAGGG	0	1
CACNA1H	chr16	1230355	1230386	rs1158727899	1230356	G	A	0.796381	GGGCAGAGCAGGGCAGGCTGGGTGAGGAGGGG	GGACAGAGCAGGGCAGGCTGGGTGAGGAGGGG	0	1
CNTNAP2	chr7	147015745	147015774	rs1159973323	147015747	G	A	0.796381	GGGGCCTATCGGGAGGTGGGGGGCAAGGGG	GGGACCTATCGGGAGGTGGGGGGCAAGGGG	0	1
CASR	chr3	121903423	121903451	rs1161913950	121903431	G	A	0.796381	GGGGGAGGGGCCGTGGCGGGGTCTGGGGG	GGGGGAGGGACCGTGGCGGGGTCTGGGGG	0	1
ATP2A2	chr12	110770913	110770930	rs1162364789	110770918	G	A	0.796381	GGGGGGGCAGGGGGCGGG	GGGGGGACAGGGGGCGGG	0	1
TPCN2	chr11	68848387	68848408	rs1163076978	68848396	T	A	0.796381	GGGGCTTGGGTCAGGGATGGGG	GGGGCTTGGGACAGGGATGGGG	0	1
FLI1	chr11	128589691	128589717	rs1163257592	128589709	G	A	0.796381	GGGAGGAGAGGGAGTCAGGGCCATGGG	GGGAGGAGAGGGAGTCAGGACCATGGG	0	1
TECPR2	chr14	102881969	102881997	rs1163822370	102881970	G	A	0.796381	GGGCCAACGTGGGGGTGGGAAGCAGAGGG	GGACCAACGTGGGGGTGGGAAGCAGAGGG	0	1
CCDC50	chr3	191046967	191046989	rs1163938641	191046971	G	A	0.796381	GGGGGGCAGGGCCCGGGGGCGGG	GGGGGACAGGGCCCGGGGGCGGG	0	1
TAB2	chr6	149726869	149726892	rs1166925718	149726881	G	C	0.796381	GGGGCTGGGAGAAGAGGGTATGGG	GGGGCTGGGAGAACAGGGTATGGG	0	1
GUCA1A	chr6	42142644	42142670	rs1166950978	42142650	G	A	0.796381	GGGTGGGGCTTCTTGGGAAAGCTGGGG	GGGTGGGACTTCTTGGGAAAGCTGGGG	0	1
CDH23	chr10	73548943	73548969	rs1167232436	73548960	G	A	0.796381	GGGAGATGGTGGGCTGGGGCTCCCGGG	GGGAGATGGTGGGCTGGGACTCCCGGG	0	1
CAMTA1	chr1	7046438	7046463	rs1167490723	7046453	G	A	0.796381	GGGAGTTTTGGGGAGGGCTCACTGGG	GGGAGTTTTGGGGAGGACTCACTGGG	0	1
ITGA3	chr17	48148586	48148612	rs1168648968	48148600	T	C	0.796381	GGGCAAGAGAGGGAATAGGGAGATGGG	GGGCAAGAGAGGGAACAGGGAGATGGG	0	1
DNMT3B	chr20	31367734	31367759	rs1168687912	31367750	C	A	0.796381	GGGAGAGGGGGCCAGGGCCAGAGGGG	GGGAGAGGGGGCCAGGGACAGAGGGG	0	1
DPP6	chr7	153794743	153794766	rs1169435041	153794753	G	A	0.796381	GGGTCTGGGTAGCAGGGATCTGGG	GGGTCTGGGTAACAGGGATCTGGG	0	1
TRIOBP	chr22	38171006	38171025	rs1170883747	38171007	G	A	0.796381	GGGCAGGGGTGAGGGCAGGG	GGACAGGGGTGAGGGCAGGG	0	1
LEP	chr7	127895652	127895678	rs1171256959	127895669	G	A	0.796381	GGGGTGGGGAATGTTTGGGCAGAAGGG	GGGGTGGGGAATGTTTGGACAGAAGGG	0	1
WWOX	chr16	78311438	78311467	rs1173492416	78311456	G	A	0.796381	GGGCAGGGGGTGGGGGAGGGCACAGTGGGG	GGGCAGGGGGTGGGGGAGGACACAGTGGGG	0	1
SLC22A4	chr5	131651310	131651338	rs1174233575	131651329	G	A	0.796381	GGGTGAAGAAGGGTAAGAGGGCCAAGGGG	GGGTGAAGAAGGGTAAGAGGACCAAGGGG	0	1
CACNA1H	chr16	1268709	1268734	rs1174799153	1268712	G	A	0.796381	GGGGGCAGGTGGGAGGGAGGATGGGG	GGGGACAGGTGGGAGGGAGGATGGGG	0	1
VPS13B	chr8	100246729	100246754	rs1175326288	100246736	G	A	0.796381	GGGAAGGGGCTTCCGCGGGGTTGGGG	GGGAAGGGACTTCCGCGGGGTTGGGG	0	1
CNTNAP2	chr7	146155226	146155252	rs1175588874	146155227	G	A	0.796381	GGGCCTGTCAGGGGTATGTGGGGAGGG	GGACCTGTCAGGGGTATGTGGGGAGGG	0	1
CC2D1A	chr19	14024122	14024143	rs1179174589	14024130	G	A	0.796381	GGGCAGAGGGCAGGGTACAGGG	GGGCAGAGGACAGGGTACAGGG	0	1
MBD5	chr2	149125885	149125916	rs1179181866	149125886	G	A	0.796381	GGGCCTGTCAGGGGTTAGGGGGTATGGAAGGG	GGACCTGTCAGGGGTTAGGGGGTATGGAAGGG	0	1
RYR1	chr19	38973042	38973069	rs1180094392	38973063	G	C	0.796381	GGGCTCCACTGGGAAGACGGGAGAGGGG	GGGCTCCACTGGGAAGACGGGACAGGGG	0	1
NTRK1	chr1	156786402	156786422	rs1181608382	156786407	G	A	0.796381	GGGAGGGCAGGGGGATGGGGG	GGGAGGACAGGGGGATGGGGG	0	1
GCDH	chr19	13008060	13008080	rs1182300694	13008064	G	A	0.796381	GGGACGGGGTGGGAGAGTGGG	GGGACAGGGTGGGAGAGTGGG	0	1
CYP4V2	chr4	187118371	187118394	rs1182309833	187118378	G	A	0.796381	GGGGGGACGGGAAAGGGTGACGGG	GGGGGGACAGGAAAGGGTGACGGG	0	1
TEAD1	chr11	12841563	12841587	rs1183971161	12841564	G	A	0.796381	GGGCCTGGGGCAGGGAGTTGTGGGG	GGACCTGGGGCAGGGAGTTGTGGGG	0	1
PEX14	chr1	10656067	10656092	rs1184018693	10656084	G	A	0.796381	GGGAAAGATGGGGCTAGGGCACCGGG	GGGAAAGATGGGGCTAGGACACCGGG	0	1
KCNQ1	chr11	2547371	2547398	rs1185587299	2547392	T	C	0.796381	GGGCCGGGAGGAGCTGGGGTGATCTGGG	GGGCCGGGAGGAGCTGGGGTGACCTGGG	0	1
PRPF31	chr19	54634652	54634679	rs1186263777	54634659	G	A	0.796381	GGGGAAGGGCCTGGGGGGCTCTGATGGG	GGGGAAGGACCTGGGGGGCTCTGATGGG	0	1
LIPC	chr15	58733314	58733337	rs1189498115	58733326	G	A	0.796381	GGGCAGGGGTGGGGCCCAGCAGGG	GGGCAGGGGTGGGACCCAGCAGGG	0	1
RAI1	chr17	17712977	17713004	rs1191153749	17712979	G	A	0.796381	GGGGCATGGGCAGCCAGGGGCTGGAGGG	GGGACATGGGCAGCCAGGGGCTGGAGGG	0	1
FIP1L1	chr4	54459534	54459551	rs1192758026	54459539	G	A	0.796381	GGGTGGGCAGGGGAAGGG	GGGTGGACAGGGGAAGGG	0	1
GABRD	chr1	1952981	1953007	rs1193299434	1952987	G	A	0.796381	GGGAAAGGCTGGGTGGGATAGGAAGGG	GGGAAAGACTGGGTGGGATAGGAAGGG	0	1
SH3BP2	chr4	2833214	2833240	rs1194142202	2833232	G	A	0.796381	GGGTGGAGTGGGGAGGGGAGCAGAGGG	GGGTGGAGTGGGGAGGGGAACAGAGGG	0	1
ALPL	chr1	21890306	21890330	rs1194458852	21890308	C	A	0.796381	GGGCCTTCGGGGTGAGGGGAGAGGG	GGGACTTCGGGGTGAGGGGAGAGGG	0	1
CACNA1D	chr3	53672198	53672224	rs1195163964	53672205	T	C	0.796381	GGGTAAGATTGGGCCTGGGGATCTGGG	GGGTAAGACTGGGCCTGGGGATCTGGG	0	1
SYNGAP1	chr6	33405796	33405825	rs1195566061	33405808	G	A	0.796381	GGGGGATCTGGGGGCATGGGTTCGGGAGGG	GGGGGATCTGGGGACATGGGTTCGGGAGGG	0	1
COL18A1	chr21	46927021	46927048	rs1196423691	46927026	G	A	0.796381	GGGAGGGCTGGGTGCTGGGCAGGGAGGG	GGGAGGACTGGGTGCTGGGCAGGGAGGG	0	1
PDE6B	chr4	620256	620286	rs1198750037	620259	G	A	0.796381	GGGGGCTTCAGGGCTCTCTGGGCTGGGAGGG	GGGGACTTCAGGGCTCTCTGGGCTGGGAGGG	0	1
SUFU	chr10	104357552	104357573	rs1201036242	104357567	G	A	0.796381	GGGTTAGGGGCTGTGGGCAGGG	GGGTTAGGGGCTGTGGACAGGG	0	1
CACNA1D	chr3	53783235	53783259	rs1203903877	53783241	G	A	0.796381	GGGCTGGGCCGTGTGGGCTGGGGGG	GGGCTGGACCGTGTGGGCTGGGGGG	0	1
MCPH1	chr8	6469024	6469046	rs1204089476	6469025	G	A	0.796381	GGGCCCGGGGCCGGGGAGCAGGG	GGACCCGGGGCCGGGGAGCAGGG	0	1
GCNT2	chr6	10556379	10556407	rs1207036385	10556401	G	A	0.796381	GGGAGGCAGAGGGAGGAGGGAAGGCTGGG	GGGAGGCAGAGGGAGGAGGGAAGACTGGG	0	1
STK11	chr19	1195324	1195356	rs1207215707	1195330	G	A	0.796381	GGGGAACGTGGGGTCAGCGAGGGGTTCTAGGGG	GGGGAACATGGGGTCAGCGAGGGGTTCTAGGGG	0	1
DCC	chr18	49876885	49876914	rs1207846993	49876906	G	A	0.796381	GGGGCCTACTGGGGAGTTGGGGGCTAGGGG	GGGGCCTACTGGGGAGTTGGGGACTAGGGG	0	1
TSC2	chr16	2120903	2120928	rs1208813461	2120909	G	A	0.796381	GGGCTGGGCAGGTGGGCGGCACAGGG	GGGCTGGACAGGTGGGCGGCACAGGG	0	1
ROBO3	chr11	124746536	124746559	rs1209417430	124746541	G	A	0.796381	GGGAGGGCTGCGGGCCAAGACGGG	GGGAGGACTGCGGGCCAAGACGGG	0	1
C10orf11	chr10	77553119	77553143	rs1210131067	77553122	G	A	0.796381	GGGAGCCGAAGGGAAGGGTTAGGGG	GGGAACCGAAGGGAAGGGTTAGGGG	0	1
AQP1	chr7	30959761	30959778	rs1210666564	30959768	G	A	0.796381	GGGATGGGGCTGGGAGGG	GGGATGGGACTGGGAGGG	0	1
TSC2	chr16	2102870	2102892	rs1211749574	2102871	G	A	0.796381	GGGCAGGGGCATGGGGTCGAGGG	GGACAGGGGCATGGGGTCGAGGG	0	1
ITGB3	chr17	45353780	45353804	rs1212397137	45353786	C	A	0.796381	GGGCAGGCCTGGGGAGGGCAGAGGG	GGGCAGGACTGGGGAGGGCAGAGGG	0	1
ORC6	chr16	46723769	46723800	rs1213529363	46723786	G	A	0.796381	GGGCGGCGGGGGAGTGACGGGGAGCGCTGGGG	GGGCGGCGGGGGAGTGACAGGGAGCGCTGGGG	0	1
GLIS2	chr16	4365649	4365673	rs1214367980	4365662	G	A	0.796381	GGGCCGGGGGCGGGGCCGCGGGGGG	GGGCCGGGGGCGGGACCGCGGGGGG	0	1
WDR62	chr19	36580029	36580055	rs1214743818	36580032	G	A	0.796381	GGGGGCTGGGGTGGGGGGTTGTCGGGG	GGGGACTGGGGTGGGGGGTTGTCGGGG	0	1
SEPT9	chr17	75418601	75418629	rs1215298732	75418605	G	A	0.796381	GGGAAGCTGGGGTAAGAGCGGGCTGGGGG	GGGAAACTGGGGTAAGAGCGGGCTGGGGG	0	1
TBX4	chr17	59529963	59529990	rs1216426344	59529983	G	A	0.796381	GGGACGAGCTGGGCGTGCGGGGCTGGGG	GGGACGAGCTGGGCGTGCGGGACTGGGG	0	1
COL9A3	chr20	61453048	61453073	rs1217833725	61453056	T	C	0.796381	GGGTGGGGATCCTCGGGGCTTCCGGG	GGGTGGGGACCCTCGGGGCTTCCGGG	0	1
IL6R	chr1	154389493	154389518	rs1218270500	154389497	T	A	0.796381	GGGGGTCAGGGAGGGGAAGCTGGGGG	GGGGGACAGGGAGGGGAAGCTGGGGG	0	1
AQP1	chr7	30907797	30907820	rs1218772993	30907800	G	A	0.796381	GGGGGCTAGGGGTAGGGCTTTGGG	GGGGACTAGGGGTAGGGCTTTGGG	0	1
CEP164	chr11	117266943	117266972	rs1221615602	117266962	G	A	0.796381	GGGGCATTGGGAGGGGCTGGGCATCAGGGG	GGGGCATTGGGAGGGGCTGGACATCAGGGG	0	1
ZNF365	chr10	64431050	64431080	rs1223792859	64431065	G	C	0.796381	GGGTGGGAGGGTGAGAGAGGGGAGGGAGGGG	GGGTGGGAGGGTGAGACAGGGGAGGGAGGGG	0	1
ATP6V1B1	chr2	71163237	71163256	rs1224319474	71163245	G	A	0.796381	GGGTGGGGAGCTGGGGTGGG	GGGTGGGGAACTGGGGTGGG	0	1
DYRK1A	chr21	38824951	38824977	rs1225345536	38824971	G	A	0.796381	GGGGAGGGGAAGGGAAGGGGAGCAGGG	GGGGAGGGGAAGGGAAGGGGAACAGGG	0	1
EHBP1	chr2	62933220	62933242	rs1227571270	62933228	G	A	0.796381	GGGGCCGGGGCTCGGGGTCCGGG	GGGGCCGGGACTCGGGGTCCGGG	0	1
LHFPL5	chr6	35773146	35773167	rs1229046030	35773161	G	A	0.796381	GGGAAGAGGGAGACGGGCAGGG	GGGAAGAGGGAGACGGACAGGG	0	1
BMPR1A	chr10	88516467	88516487	rs1230247470	88516475	G	A	0.796381	GGGAGGAGGGCCAAGGGCGGG	GGGAGGAGGACCAAGGGCGGG	0	1
UPB1	chr22	24890377	24890403	rs1231276367	24890378	G	A	0.796381	GGGCAGGGCTGAAAAGGGGCCCTAGGG	GGACAGGGCTGAAAAGGGGCCCTAGGG	0	1
NDUFAF6	chr8	96021739	96021764	rs1232612897	96021757	G	C	0.796381	GGGTCAGTGGGTTATGGGAGAGAGGG	GGGTCAGTGGGTTATGGGACAGAGGG	0	1
PHF11	chr13	50070243	50070273	rs1233706075	50070267	G	A	0.796381	GGGGGCGGGCGGGCGGGCGGGCGGGGCTGGG	GGGGGCGGGCGGGCGGGCGGGCGGGACTGGG	0	1
TSHZ1	chr18	72924122	72924151	rs1234056670	72924135	G	A	0.796381	GGGGGAGGCCGGGGGCCGCGGGACGGCGGG	GGGGGAGGCCGGGGACCGCGGGACGGCGGG	0	1
INF2	chr14	105165965	105165982	rs1235626615	105165972	C	A	0.796381	GGGCCGGGCCTGGGAGGG	GGGCCGGGACTGGGAGGG	0	1
TAB2	chr6	149639363	149639386	rs1235866761	149639380	G	A	0.796381	GGGGGTGGGGAGCATCGGGCCGGG	GGGGGTGGGGAGCATCGGACCGGG	0	1
PEX26	chr22	18573531	18573555	rs1237153074	18573549	G	C	0.796381	GGGATGGGAGGGTGGGGGAGAGGGG	GGGATGGGAGGGTGGGGGACAGGGG	0	1
CHAT	chr10	50818065	50818092	rs1237265657	50818077	G	A	0.796381	GGGCGGGGGGCAGGCAGGGGGCGGGGGG	GGGCGGGGGGCAGACAGGGGGCGGGGGG	0	1
TECR	chr19	14647757	14647788	rs1238923921	14647758	G	A	0.796381	GGGCAGATGTGGGGAGGAGGGGCCGAGGAGGG	GGACAGATGTGGGGAGGAGGGGCCGAGGAGGG	0	1
TRIOBP	chr22	38093148	38093172	rs1239597441	38093165	T	C	0.796381	GGGGTAGGGGTCGAGGGATCCGGGG	GGGGTAGGGGTCGAGGGACCCGGGG	0	1
INPPL1	chr11	71936044	71936072	rs1239738293	71936053	G	A	0.796381	GGGGCGCCGGGCCCGGGGGGCGCCCTGGG	GGGGCGCCGGACCCGGGGGGCGCCCTGGG	0	1
CACNA1C	chr12	2698724	2698745	rs1240277988	2698731	G	A	0.796381	GGGGCAGGGCAGGAGGGCAGGG	GGGGCAGGACAGGAGGGCAGGG	0	1
ALPL	chr1	21870421	21870444	rs1240931861	21870424	G	C	0.796381	GGGAGCTGGGTGGGCTTGGATGGG	GGGACCTGGGTGGGCTTGGATGGG	0	1
PDP1	chr8	94929726	94929754	rs1241942604	94929727	G	A	0.796381	GGGCACCCCTGGGGCGGGGCCGGGCCGGG	GGACACCCCTGGGGCGGGGCCGGGCCGGG	0	1
EGFR	chr7	55198167	55198193	rs1242210517	55198181	C	A	0.796381	GGGATTACAGGGTAGCCAGGGAAAGGG	GGGATTACAGGGTAGACAGGGAAAGGG	0	1
SPINT2	chr19	38747235	38747262	rs1242844468	38747238	G	A	0.796381	GGGGGCTCCCGGGCCGGGATCCTGTGGG	GGGGACTCCCGGGCCGGGATCCTGTGGG	0	1
NPAS2	chr2	101592721	101592743	rs1243494576	101592722	G	A	0.796381	GGGCTGGGTGGCTGAGGGCTGGG	GGACTGGGTGGCTGAGGGCTGGG	0	1
TBX4	chr17	59555794	59555817	rs1244266459	59555810	G	C	0.796381	GGGCTGGGGTGGGGAGAGTTTGGG	GGGCTGGGGTGGGGAGACTTTGGG	0	1
C10orf11	chr10	77642436	77642457	rs1247013436	77642454	G	A	0.796381	GGGCCTGGGGAGGAGGGACGGG	GGGCCTGGGGAGGAGGGACAGG	0	1
FIP1L1	chr4	54554003	54554034	rs1247017066	54554023	G	A	0.796381	GGGCCTGTCAGGGGTTGGGGGGCAAGGGAGGG	GGGCCTGTCAGGGGTTGGGGGACAAGGGAGGG	0	1
IFT122	chr3	129206936	129206961	rs1247254383	129206955	G	A	0.796381	GGGTGGGCTGGGCAGGCTGGGCAGGG	GGGTGGGCTGGGCAGGCTGGACAGGG	0	1
CDT1	chr16	88871080	88871105	rs1247729147	88871094	G	A	0.796381	GGGGCGGGGCCTGGGGCAGATGCGGG	GGGGCGGGGCCTGGGACAGATGCGGG	0	1
MYO15A	chr17	18027559	18027585	rs1249622799	18027579	C	A	0.796381	GGGAGCTCATGGGAGGGCCTGCCTGGG	GGGAGCTCATGGGAGGGCCTGACTGGG	0	1
TCF7L2	chr10	114712176	114712206	rs1250296629	114712187	G	A	0.796381	GGGCTCTCCCGGGCCGCGCAGGGCAGCAGGG	GGGCTCTCCCGGACCGCGCAGGGCAGCAGGG	0	1
NCF1	chr7	74198001	74198028	rs1250588217	74198018	G	A	0.796381	GGGGTGTGGGAGAAAGGGGCAGGCAGGG	GGGGTGTGGGAGAAAGGGACAGGCAGGG	0	1
HMOX1	chr22	35776964	35776992	rs1250871467	35776981	G	A	0.796381	GGGGCGGGCTGGGCGCGGGCCCCTGCGGG	GGGGCGGGCTGGGCGCGGACCCCTGCGGG	0	1
MLPH	chr2	238403242	238403270	rs1255146514	238403245	T	A	0.796381	GGGGTCTCCAGGGTGAGAGGGATCAAGGG	GGGGACTCCAGGGTGAGAGGGATCAAGGG	0	1
RET	chr10	43611467	43611489	rs1255795836	43611483	T	A	0.796381	GGGGGCCAGGGTGGGGGTCTGGG	GGGGGCCAGGGTGGGGGACTGGG	0	1
SUGCT	chr7	40539820	40539843	rs1256422343	40539831	G	C	0.796381	GGGTAGGGAAGAGAGGGCACAGGG	GGGTAGGGAAGACAGGGCACAGGG	0	1
NAT8L	chr4	2067002	2067022	rs1256588047	2067015	G	A	0.796381	GGGCAGGGTGGGGGGCAAGGG	GGGCAGGGTGGGGGACAAGGG	0	1
ING1	chr13	111368228	111368251	rs1257953391	111368244	G	A	0.796381	GGGCCTGTGGGCTCGGGGCCGGGG	GGGCCTGTGGGCTCGGGACCGGGG	0	1
MIB1	chr18	19294318	19294343	rs1258307292	19294331	T	C	0.796381	GGGAGTAGGGAGGATAGGGCATGGGG	GGGAGTAGGGAGGACAGGGCATGGGG	0	1
CACNA1D	chr3	53629910	53629935	rs1258632402	53629916	G	A	0.796381	GGGCAGGGCAGGAGGGAATGCTGGGG	GGGCAGGACAGGAGGGAATGCTGGGG	0	1
PADI4	chr1	17683264	17683290	rs1259219388	17683284	G	A	0.796381	GGGGTTGGCTGGGCAAACGGGGCAGGG	GGGGTTGGCTGGGCAAACGGGACAGGG	0	1
ELN	chr7	73462387	73462416	rs1260200081	73462389	C	A	0.796381	GGGCCCCGAGGGCAGAGCAGGGGGAGGGGG	GGGACCCGAGGGCAGAGCAGGGGGAGGGGG	0	1
AGRN	chr1	972538	972557	rs1260952883	972545	G	A	0.796381	GGGGCCGGGCAGGGCCAGGG	GGGGCCGGACAGGGCCAGGG	0	1
ITGB4	chr17	73723425	73723448	rs1261289241	73723436	C	A	0.796381	GGGTTGGGGCAGCCAGGGAATGGG	GGGTTGGGGCAGACAGGGAATGGG	0	1
NDUFAF6	chr8	95961994	95962019	rs1262750948	95962009	G	A	0.796381	GGGTCGAGGGTTTGGGGCACAAAGGG	GGGTCGAGGGTTTGGGACACAAAGGG	0	1
AMPD3	chr11	10518669	10518700	rs1262898278	10518670	G	A	0.796381	GGGCAGCTCTGGGAGTCAGTGGGTGTGGGGGG	GGACAGCTCTGGGAGTCAGTGGGTGTGGGGGG	0	1
DPP6	chr7	154263003	154263024	rs1263176504	154263004	G	A	0.796381	GGGCTCTGGGGGTGGGTGTGGG	GGACTCTGGGGGTGGGTGTGGG	0	1
DIS3L2	chr2	232926799	232926819	rs1263182425	232926805	G	A	0.796381	GGGGCGGGCTGGGTTGGGGGG	GGGGCGGACTGGGTTGGGGGG	0	1
KAT6B	chr10	76665297	76665322	rs1263611049	76665311	G	A	0.796381	GGGCTTGGGAATTGGGCTGCCTAGGG	GGGCTTGGGAATTGGACTGCCTAGGG	0	1
SERPINH1	chr11	75273134	75273154	rs1264339524	75273147	G	A	0.796381	GGGAGGGGCCGGGGGCCGGGG	GGGAGGGGCCGGGGACCGGGG	0	1
WWOX	chr16	78143581	78143599	rs1264993978	78143589	G	A	0.796381	GGGGGCGGGGCTGGGAGGG	GGGGGCGGGACTGGGAGGG	0	1
GNA11	chr19	3101138	3101168	rs1268942356	3101152	G	A	0.796381	GGGCCCTGCAGGGACGGAGTGGGGTGGGGGG	GGGCCCTGCAGGGACAGAGTGGGGTGGGGGG	0	1
CCND1	chr11	69464525	69464545	rs1270789981	69464542	G	A	0.796381	GGGTCATGGGCGAGGGACGGG	GGGTCATGGGCGAGGGACAGG	0	1
GABRD	chr1	1954201	1954227	rs1271020397	1954220	T	A	0.796381	GGGGTCCCGTGGGCGCGGGGTCCTGGG	GGGGTCCCGTGGGCGCGGGGACCTGGG	0	1
CD27	chr12	6559995	6560018	rs1274229933	6560001	G	A	0.796381	GGGCTGGGCTGAGGGAGCCAAGGG	GGGCTGGACTGAGGGAGCCAAGGG	0	1
GRK1	chr13	114437482	114437509	rs1275386345	114437493	G	A	0.796381	GGGCCAGCATGGGCCAGCCGGGTCAGGG	GGGCCAGCATGGACCAGCCGGGTCAGGG	0	1
ATG16L1	chr2	234161030	234161054	rs1275394849	234161037	G	A	0.796381	GGGGAAACGGGATAGGGGATCAGGG	GGGGAAACAGGATAGGGGATCAGGG	0	1
DNAH11	chr7	21901844	21901867	rs1278023328	21901853	G	A	0.796381	GGGGAGTGGGGCCGGTGGGGTGGG	GGGGAGTGGGACCGGTGGGGTGGG	0	1
EPAS1	chr2	46526429	46526453	rs1279203266	46526432	T	C	0.796381	GGGATCGCTAGGGGAGGGGATTGGG	GGGACCGCTAGGGGAGGGGATTGGG	0	1
OTOG	chr11	17653559	17653588	rs1279875948	17653575	G	C	0.796381	GGGCAGGGAGGGGAGGAGCTGGGCACTGGG	GGGCAGGGAGGGGAGGACCTGGGCACTGGG	0	1
GRHL2	chr8	102619866	102619891	rs1280562553	102619867	G	A	0.796381	GGGCTGGGGGGCACTCCTGGGAGGGG	GGACTGGGGGGCACTCCTGGGAGGGG	0	1
CCND1	chr11	69456849	69456873	rs1281413966	69456852	G	A	0.796381	GGGAGCCCGCGGGAGGGGCGCAGGG	GGGAACCCGCGGGAGGGGCGCAGGG	0	1
COL18A1	chr21	46927021	46927048	rs1281812092	46927038	G	A	0.796381	GGGAGGGCTGGGTGCTGGGCAGGGAGGG	GGGAGGGCTGGGTGCTGGACAGGGAGGG	0	1
CSF2RB	chr22	37323421	37323445	rs1282887184	37323431	G	A	0.796381	GGGGGTAAAGGGCAGGGCCCCTGGG	GGGGGTAAAGGACAGGGCCCCTGGG	0	1
KALRN	chr3	123813949	123813977	rs1287460910	123813959	G	C	0.796381	GGGAATCGGGAGCACAGGGTCATTTGGGG	GGGAATCGGGACCACAGGGTCATTTGGGG	0	1
DYSF	chr2	71733335	71733356	rs1287963918	71733336	G	A	0.796381	GGGCTGGGCATGGCAGGGTGGG	GGACTGGGCATGGCAGGGTGGG	0	1
FAM20C	chr7	296042	296071	rs1288638106	296050	G	A	0.796381	GGGAGCTGGGCCTGGGCGGGCATGGGAGGG	GGGAGCTGGACCTGGGCGGGCATGGGAGGG	0	1
TSC2	chr16	2131411	2131436	rs1289400305	2131423	G	A	0.796381	GGGGCTGAGCGGGGCAGCAGGGTGGG	GGGGCTGAGCGGGACAGCAGGGTGGG	0	1
SLC4A4	chr4	72383650	72383679	rs1290844090	72383662	G	A	0.796381	GGGCAGGCCTGGGGCCTGGGTCCATGAGGG	GGGCAGGCCTGGGACCTGGGTCCATGAGGG	0	1
KCNQ1	chr11	2547887	2547913	rs1291180383	2547897	G	A	0.796381	GGGCTCTGGGGGCCTGGGGAGGGTGGG	GGGCTCTGGGGACCTGGGGAGGGTGGG	0	1
TNNT3	chr11	1946568	1946596	rs1291443271	1946587	G	C	0.796381	GGGGGTGGGGGAGAGGGGGAGAGGGTGGG	GGGGGTGGGGGAGAGGGGGACAGGGTGGG	0	1
H6PD	chr1	9295034	9295060	rs1291735035	9295045	G	C	0.796381	GGGCGCAGGGGAGCCCTCGGGAGCGGG	GGGCGCAGGGGACCCCTCGGGAGCGGG	0	1
EHBP1	chr2	62981888	62981910	rs1293122000	62981889	G	A	0.796381	GGGCAGGGCTCTGTGGGCGTGGG	GGACAGGGCTCTGTGGGCGTGGG	0	1
LFNG	chr7	2563391	2563414	rs1294254852	2563404	G	A	0.796381	GGGAGGGGTGCTGGGCTGCATGGG	GGGAGGGGTGCTGGACTGCATGGG	0	1
CTNNB1	chr3	41241532	41241558	rs1294595142	41241543	G	A	0.796381	GGGATGCGCCGGGCCCTGGGTGGGGGG	GGGATGCGCCGGACCCTGGGTGGGGGG	0	1
NCF1	chr7	74203326	74203351	rs1295330725	74203332	G	A	0.796381	GGGCGGGGCCAGTGGGCGGGGCGGGG	GGGCGGGACCAGTGGGCGGGGCGGGG	0	1
EPHB2	chr1	23152174	23152201	rs1297136284	23152184	G	A	0.796381	GGGAGCCAGGGGCTAGGGCCACCCTGGG	GGGAGCCAGGGACTAGGGCCACCCTGGG	0	1
ITGA3	chr17	48148586	48148612	rs1299997527	48148593	G	C	0.796381	GGGCAAGAGAGGGAATAGGGAGATGGG	GGGCAAGACAGGGAATAGGGAGATGGG	0	1
DSG2	chr18	29078043	29078060	rs1302122401	29078049	G	A	0.796381	GGGTTGGGCTGGGCTGGG	GGGTTGGACTGGGCTGGG	0	1
CAMTA1	chr1	6985164	6985188	rs1302395435	6985172	G	A	0.796381	GGGCAGTGGGCAGGGGGCCCAAGGG	GGGCAGTGGACAGGGGGCCCAAGGG	0	1
RNASEH2B	chr13	51492915	51492942	rs1303529679	51492924	G	A	0.796381	GGGTGCCGGGGCAGTGGGACGGGGAGGG	GGGTGCCGGGACAGTGGGACGGGGAGGG	0	1
RPIA	chr2	89020723	89020751	rs1303609191	89020724	G	A	0.796381	GGGCCTGTCAGGGGGTGAGGGGCTAGGGG	GGACCTGTCAGGGGGTGAGGGGCTAGGGG	0	1
COL4A2	chr13	111065972	111065999	rs1305034084	111065989	G	A	0.796381	GGGAAGGGGTGTGCCAGGGCAGTGGGGG	GGGAAGGGGTGTGCCAGGACAGTGGGGG	0	1
PPARA	chr22	46546681	46546707	rs1305183550	46546691	T	A	0.796381	GGGGCCCGGGGTCTCGGGGTCTCCGGG	GGGGCCCGGGGACTCGGGGTCTCCGGG	0	1
EXT2	chr11	44243224	44243249	rs1305278169	44243231	T	C	0.796381	GGGCAGGATTGGGCCCAGGGCCAGGG	GGGCAGGACTGGGCCCAGGGCCAGGG	0	1
GPHN	chr14	67505003	67505028	rs1306910969	67505023	T	C	0.796381	GGGGCTGGGAGGAGAGGGAAATAGGG	GGGGCTGGGAGGAGAGGGAAACAGGG	0	1
PRNP	chr20	4667185	4667209	rs1307264102	4667192	G	A	0.796381	GGGCGGGGGCAGGGGAGCCGCGGGG	GGGCGGGGACAGGGGAGCCGCGGGG	0	1
ZAP70	chr2	98354162	98354180	rs1307401114	98354163	G	A	0.796381	GGGCTGGGTGGGTAGAGGG	GGACTGGGTGGGTAGAGGG	0	1
CSF2RB	chr22	37310573	37310592	rs1308613312	37310585	T	A	0.796381	GGGTGGGTGGGTATCTGGGG	GGGTGGGTGGGTAACTGGGG	0	1
BCR	chr22	23610416	23610442	rs1308771619	23610433	G	A	0.796381	GGGTGCGTGGGGAGGGGAGCAGGTGGG	GGGTGCGTGGGGAGGGGAACAGGTGGG	0	1
CACNA1H	chr16	1227692	1227724	rs1310021591	1227698	G	A	0.796381	GGGAAGGGCTGGGCAGGATGGGGCTCCACGGGG	GGGAAGGACTGGGCAGGATGGGGCTCCACGGGG	0	1
KCNK3	chr2	26944105	26944131	rs1313600434	26944113	C	A	0.796381	GGGTGGGGGCCTGAGAGGGGCAGAGGG	GGGTGGGGGACTGAGAGGGGCAGAGGG	0	1
COL4A3	chr2	228121058	228121088	rs1313680959	228121069	C	T	0.796381	GGGAGTCAAGGGCAACAGGGGTTTCCCTGGG	GGGAGTCAAGGGTAACAGGGGTTTCCCTGGG	0	1
TUBB3	chr16	89990796	89990821	rs1314148402	89990798	G	A	0.796381	GGGGCTCGGGCGGGGCGGGTTGGGGG	GGGACTCGGGCGGGGCGGGTTGGGGG	0	1
FBLN1	chr22	45958452	45958476	rs1315483222	45958470	G	A	0.796381	GGGCAAGGGCCTGGGAAGGGCAGGG	GGGCAAGGGCCTGGGAAGGACAGGG	0	1
CEACAM16	chr19	45213675	45213700	rs1316100754	45213676	G	A	0.796381	GGGCAGGGGAGCAGAAGGGGTGGGGG	GGACAGGGGAGCAGAAGGGGTGGGGG	0	1
SH3BP2	chr4	2813251	2813271	rs1316454030	2813252	G	A	0.796381	GGGCTCTGGGCCTGGGCAGGG	GGACTCTGGGCCTGGGCAGGG	0	1
ESRRB	chr14	76797182	76797208	rs1316685730	76797195	A	C	0.796381	GGGAGAATCTGGGAATGCAGGGTGGGG	GGGAGAATCTGGGACTGCAGGGTGGGG	0	1
JAM3	chr11	134018328	134018354	rs1316771139	134018338	G	A	0.796381	GGGGGCAGGGGGCAAGTGGGTTTGGGG	GGGGGCAGGGGACAAGTGGGTTTGGGG	0	1
SH3BP2	chr4	2835906	2835928	rs1320169971	2835907	G	A	0.796381	GGGCCAGGGCAGCTGGGTGGGGG	GGACCAGGGCAGCTGGGTGGGGG	0	1
RUNX2	chr6	45503512	45503539	rs1321392278	45503520	G	A	0.796381	GGGTAGGGGGCTAGTGGGATACTAAGGG	GGGTAGGGGACTAGTGGGATACTAAGGG	0	1
PLCB1	chr20	8829341	8829368	rs1321542514	8829350	G	A	0.796381	GGGCTGGGGGGCCATGAGGGCCCAAGGG	GGGCTGGGGGACCATGAGGGCCCAAGGG	0	1
LIAS	chr4	39460792	39460816	rs1321810151	39460800	G	T	0.796381	GGGGCGAACGGGTTTGGGCGTGGGG	GGGGCGAACTGGTTTGGGCGTGGGG	0	1
PSEN2	chr1	227058258	227058282	rs1322446371	227058275	G	A	0.796381	GGGCGGGCGTGGGGCGGGGCCTGGG	GGGCGGGCGTGGGGCGGGACCTGGG	0	1
CYP4F22	chr19	15659276	15659303	rs1323121562	15659282	G	A	0.796381	GGGATGGGCCTGTGAGGGTGCAGTTGGG	GGGATGGACCTGTGAGGGTGCAGTTGGG	0	1
SEMA4A	chr1	156138681	156138706	rs1323500048	156138685	C	A	0.796381	GGGAGCCACAGGGGAAGAGGGTTGGG	GGGAGACACAGGGGAAGAGGGTTGGG	0	1
SEPT9	chr17	75371501	75371524	rs1325378007	75371510	G	A	0.796381	GGGAGGGGAGGCCAGGGTTTGGGG	GGGAGGGGAGACCAGGGTTTGGGG	0	1
MEF2A	chr15	100036554	100036581	rs1325958767	100036561	G	A	0.796381	GGGAGGACGAGGGTGTGGGCAGGGAGGG	GGGAGGACAAGGGTGTGGGCAGGGAGGG	0	1
SYT14	chr1	210133106	210133129	rs1327706529	210133124	T	C	0.796381	GGGCTAGGGGAGGGGAGAATAGGG	GGGCTAGGGGAGGGGAGAACAGGG	0	1
TREX1	chr3	48506760	48506785	rs1330243425	48506763	G	A	0.796381	GGGAGCAGGGCCTGGGTGTGGAAGGG	GGGAACAGGGCCTGGGTGTGGAAGGG	0	1
MVK	chr12	110011595	110011621	rs1331102893	110011614	G	C	0.796381	GGGCGCTCTGGGTTGTGGGAGTTGGGG	GGGCGCTCTGGGTTGTGGGACTTGGGG	0	1
DYSF	chr2	71730618	71730640	rs1331712091	71730632	G	A	0.796381	GGGGAGATGGGAAGGGCAGAGGG	GGGGAGATGGGAAGGACAGAGGG	0	1
TGM6	chr20	2395525	2395553	rs1331968046	2395526	G	A	0.796381	GGGCTGGGGTTGGGGTGGGGAGGAATGGG	GGACTGGGGTTGGGGTGGGGAGGAATGGG	0	1
WWOX	chr16	79124104	79124127	rs1332492646	79124111	G	C	0.796381	GGGTCTGAGTGGGCCAGGGTCGGG	GGGTCTGACTGGGCCAGGGTCGGG	0	1
ITGB3	chr17	45353020	45353041	rs1334153227	45353035	G	A	0.796381	GGGGGGAGGGGCGGGAGCTGGG	GGGGGGAGGGGCGGGAACTGGG	0	1
GATA4	chr8	11536044	11536071	rs1335250074	11536060	G	C	0.796381	GGGTTTTAGTGGGAAAAGCAGGGACGGG	GGGTTTTAGTGGGAAAACCAGGGACGGG	0	1
TSHZ1	chr18	72924122	72924151	rs1335681531	72924145	G	A	0.796381	GGGGGAGGCCGGGGGCCGCGGGACGGCGGG	GGGGGAGGCCGGGGGCCGCGGGACAGCGGG	0	1
SLC5A1	chr22	32465243	32465266	rs1336144013	32465256	G	C	0.796381	GGGTCTGGGGGTGAGCGGGTGGGG	GGGTCTGGGGGTGACCGGGTGGGG	0	1
C10orf11	chr10	77885005	77885031	rs1336896020	77885014	G	A	0.796381	GGGGTGGAGGGCTAGGGGGAAGCTGGG	GGGGTGGAGGACTAGGGGGAAGCTGGG	0	1
PACRG	chr6	163475964	163475987	rs1338215841	163475967	T	C	0.796381	GGGATTGGAGGGAGGGAATTAGGG	GGGACTGGAGGGAGGGAATTAGGG	0	1
ESRRB	chr14	76800540	76800563	rs1342109859	76800542	G	A	0.796381	GGGGCCTGGGTGGGTGGCGAGGGG	GGGACCTGGGTGGGTGGCGAGGGG	0	1
THRA	chr17	38225940	38225959	rs1343003439	38225945	T	C	0.796381	GGGGAATTGGGCAGGGGGGG	GGGGAACTGGGCAGGGGGGG	0	1
OTOGL	chr12	80631412	80631438	rs1344066211	80631414	G	A	0.796381	GGGGCAGAGCGGGTTGGGAGTAAGGGG	GGGACAGAGCGGGTTGGGAGTAAGGGG	0	1
DOK7	chr4	3475373	3475394	rs1344096667	3475376	G	A	0.796381	GGGGGCCGGGGCCGGGCGGGGG	GGGGACCGGGGCCGGGCGGGGG	0	1
NOS3	chr7	150696738	150696764	rs1344980983	150696757	G	C	0.796381	GGGTTTGTAGGGGTGGGTGAGTGTGGG	GGGTTTGTAGGGGTGGGTGACTGTGGG	0	1
NAT8L	chr4	2067708	2067740	rs1345040135	2067721	G	A	0.796381	GGGGCATGCTGGGGGCAGGAGGGGCAGGGCGGG	GGGGCATGCTGGGGACAGGAGGGGCAGGGCGGG	0	1
VCL	chr10	75759347	75759370	rs1345159421	75759363	G	A	0.796381	GGGTCTGTCTGGGTGGGGCTTGGG	GGGTCTGTCTGGGTGGGACTTGGG	0	1
RGS9	chr17	63153602	63153631	rs1345294537	63153620	G	A	0.796381	GGGAGCAGGTGGGTGGGACGGGTGTACGGG	GGGAGCAGGTGGGTGGGACAGGTGTACGGG	0	1
POLH	chr6	43562678	43562708	rs1345547690	43562697	G	A	0.796381	GGGGGCTGGGGAGGTGGGGGGCATATGGGGG	GGGGGCTGGGGAGGTGGGGGACATATGGGGG	0	1
POR	chr7	75599429	75599454	rs1348868210	75599438	G	A	0.796381	GGGAAATGGGGCCGGGCCACTGCGGG	GGGAAATGGGACCGGGCCACTGCGGG	0	1
CHST14	chr15	40763483	40763510	rs1348903599	40763484	G	A	0.796381	GGGCCCCTCTGGGCAGGGCCCGGGCGGG	GGACCCCTCTGGGCAGGGCCCGGGCGGG	0	1
EPHB2	chr1	23039611	23039630	rs1349263899	23039614	G	A	0.796381	GGGGGCAGGGTGGGGAAGGG	GGGGACAGGGTGGGGAAGGG	0	1
WDR62	chr19	36592810	36592835	rs1353804633	36592811	G	A	0.796381	GGGCAACAGGGCAGGGATGGGTGGGG	GGACAACAGGGCAGGGATGGGTGGGG	0	1
KLHL40	chr3	42729912	42729940	rs1355807370	42729913	G	A	0.796381	GGGCTTGGGTAAGGGCGGGGAGGTTGGGG	GGACTTGGGTAAGGGCGGGGAGGTTGGGG	0	1
PNPLA3	chr22	44351516	44351545	rs1355934616	44351526	G	A	0.796381	GGGCCAGCAGGGCAGACGGGCGCCGCGGGG	GGGCCAGCAGGACAGACGGGCGCCGCGGGG	0	1
MRPS22	chr3	138760593	138760613	rs1357019914	138760603	T	C	0.796381	GGGTGGGGAGATAGGGGAGGG	GGGTGGGGAGACAGGGGAGGG	0	1
ENPP1	chr6	132129444	132129468	rs1357727161	132129449	G	A	0.796381	GGGAGGGCTGGGAGTACGGGGAGGG	GGGAGGACTGGGAGTACGGGGAGGG	0	1
KCNK3	chr2	26948182	26948209	rs1357953653	26948193	G	A	0.796381	GGGCTCTGGCGGGCAGCGAGGGTGGGGG	GGGCTCTGGCGGACAGCGAGGGTGGGGG	0	1
ITPKC	chr19	41224972	41224995	rs1358561834	41224981	G	C	0.796381	GGGGCTGGGAGCCGTGGGGCTGGG	GGGGCTGGGACCCGTGGGGCTGGG	0	1
MUC5B	chr11	1245783	1245810	rs1359244274	1245799	G	A	0.796381	GGGAGGGGCTGCCTGGGGCTGGGGAGGG	GGGAGGGGCTGCCTGGGACTGGGGAGGG	0	1
CACNB2	chr10	18779769	18779792	rs1359888505	18779770	G	A	0.796381	GGGCCGGTGGGGGAGGGGGGAGGG	GGACCGGTGGGGGAGGGGGGAGGG	0	1
RYR1	chr19	38934290	38934310	rs1360364432	38934303	G	A	0.796381	GGGCGTGGGCAGGGGCCAGGG	GGGCGTGGGCAGGGACCAGGG	0	1
GNPTG	chr16	1411946	1411972	rs1360524937	1411949	T	C	0.796381	GGGATCCTCGGGTGAGTGGGGCCGGGG	GGGACCCTCGGGTGAGTGGGGCCGGGG	0	1
KMT2A	chr11	118307428	118307457	rs1361403705	118307432	G	A	0.796381	GGGAAGCAGCGGGGCTGGGGTTCCAGGGGG	GGGAAACAGCGGGGCTGGGGTTCCAGGGGG	0	1
ATN1	chr12	7038042	7038065	rs1361700520	7038055	G	T	0.796381	GGGAAGTGGGAAACGGGAAAGGGG	GGGAAGTGGGAAACTGGAAAGGGG	0	1
GHRHR	chr7	31013765	31013796	rs1361914937	31013775	G	A	0.796381	GGGCGGGTTGGGCACCATGGGGAGGTAAAGGG	GGGCGGGTTGGACACCATGGGGAGGTAAAGGG	0	1
IRF5	chr7	128587677	128587696	rs1363876704	128587687	G	C	0.796381	GGGTGGGAAAAGTGGGAGGG	GGGTGGGAAAACTGGGAGGG	0	1
RPL5	chr1	93298301	93298322	rs1364497844	93298309	C	A	0.796381	GGGGTAGGGCCCCAAGGGTGGG	GGGGTAGGGACCCAAGGGTGGG	0	1
FLI1	chr11	128582649	128582674	rs1365563703	128582661	G	A	0.796381	GGGAGTTATGGGAGCTTTGGGTGGGG	GGGAGTTATGGGAACTTTGGGTGGGG	0	1
EIF2B5	chr3	184291340	184291364	rs1366558977	184291341	G	A	0.796381	GGGCCAAGGGCACGGGGGCTGTGGG	GGACCAAGGGCACGGGGGCTGTGGG	0	1
ACSF3	chr16	89157633	89157655	rs1366696950	89157647	G	A	0.796381	GGGGAGGAGGGCGGGGCTCGGGG	GGGGAGGAGGGCGGGACTCGGGG	0	1
TCTN2	chr12	124179274	124179300	rs1367931393	124179290	G	A	0.796381	GGGAGGGCAGGGGCAGGGCACTTGGGG	GGGAGGGCAGGGGCAGGACACTTGGGG	0	1
ACY1	chr3	52019156	52019185	rs1369250141	52019157	G	A	0.796381	GGGCTGCCTGGGCTGGTGGGAAGCTGTGGG	GGACTGCCTGGGCTGGTGGGAAGCTGTGGG	0	1
MTMR14	chr3	9740332	9740359	rs1369680742	9740336	G	A	0.796381	GGGAGGCAGGGTGCCTTGGGGAGTTGGG	GGGAGACAGGGTGCCTTGGGGAGTTGGG	0	1
KCNQ1	chr11	2547371	2547398	rs1370394998	2547382	G	A	0.796381	GGGCCGGGAGGAGCTGGGGTGATCTGGG	GGGCCGGGAGGAACTGGGGTGATCTGGG	0	1
SLC29A3	chr10	73102353	73102379	rs1372041863	73102365	G	A	0.796381	GGGCCTCACCGGGGCTTGGGCTGGGGG	GGGCCTCACCGGGACTTGGGCTGGGGG	0	1
EIF2B5	chr3	184390841	184390862	rs1372862692	184390856	G	A	0.796381	GGGAGGAGCTGGGTGGGCCGGG	GGGAGGAGCTGGGTGGACCGGG	0	1
ALDOA	chr16	30066254	30066279	rs1373625431	30066256	T	A	0.796381	GGGTCTGGTCGGGGATAAAGGGTGGG	GGGACTGGTCGGGGATAAAGGGTGGG	0	1
RYR1	chr19	39051581	39051606	rs1374756596	39051598	G	T	0.796381	GGGGGTGGGGATGGGGACGAGAGGGG	GGGGGTGGGGATGGGGACTAGAGGGG	0	1
GP1BB	chr22	19711258	19711285	rs1374987340	19711259	G	A	0.796381	GGGCTACCGGGACGCCGGGCATCAGGGG	GGACTACCGGGACGCCGGGCATCAGGGG	0	1
DYSF	chr2	71802191	71802214	rs1376892400	71802205	G	A	0.796381	GGGGTTTGGGCTGGGGCCCTAGGG	GGGGTTTGGGCTGGGACCCTAGGG	0	1
NAGS	chr17	42084377	42084403	rs1377161148	42084392	G	A	0.796381	GGGAGAGATGGGCGGGGCTTAGGTGGG	GGGAGAGATGGGCGGGACTTAGGTGGG	0	1
GATAD1	chr7	92077343	92077374	rs1379375611	92077352	G	T	0.796381	GGGCGGGGACGGGCTGGCTGGGAGCGGGCGGG	GGGCGGGGACTGGCTGGCTGGGAGCGGGCGGG	0	1
DPP10	chr2	116023272	116023294	rs1381579698	116023281	T	A	0.796381	GGGATAAGGGTCAGGGAAAGGGG	GGGATAAGGGACAGGGAAAGGGG	0	1
CDH23	chr10	73462131	73462155	rs1384588039	73462136	G	A	0.796381	GGGAACGGAGGGAGCTGGGGAGGGG	GGGAACAGAGGGAGCTGGGGAGGGG	0	1
SLC22A18	chr11	2930694	2930724	rs1385070166	2930695	G	A	0.796381	GGGCTGGACGGGGGTGGGGGGCGACGTGGGG	GGACTGGACGGGGGTGGGGGGCGACGTGGGG	0	1
CA4	chr17	58231198	58231222	rs1386267271	58231212	C	A	0.796381	GGGGCTGGGGATGGGCCATCAGGGG	GGGGCTGGGGATGGGACATCAGGGG	0	1
ZNF592	chr15	85291911	85291936	rs1386543698	85291927	G	A	0.796381	GGGCCGGGCCGAGCGGGGCCTGCGGG	GGGCCGGGCCGAGCGGGACCTGCGGG	0	1
CDH23	chr10	73358653	73358676	rs1386763632	73358669	G	A	0.796381	GGGGCACTGGGCCAAGGGCTTGGG	GGGGCACTGGGCCAAGGACTTGGG	0	1
AQP1	chr7	30960813	30960841	rs1389168421	30960815	G	A	0.796381	GGGGCTTCCTGGGGAGGGGTCCTCCGGGG	GGGACTTCCTGGGGAGGGGTCCTCCGGGG	0	1
COL6A2	chr21	47546523	47546552	rs1389994089	47546529	G	A	0.796381	GGGCCGGGCTGGGGGAGGGGCCGTGCAGGG	GGGCCGGACTGGGGGAGGGGCCGTGCAGGG	0	1
DNMT3B	chr20	31365612	31365636	rs1391030951	31365619	G	A	0.796381	GGGTCAGGGCTTGGGAGAAAAAGGG	GGGTCAGGACTTGGGAGAAAAAGGG	0	1
PIK3R2	chr19	18264428	18264457	rs1391868581	18264450	G	A	0.796381	GGGGCAGAATGGGGTGCGGGAGGGCCGGGG	GGGGCAGAATGGGGTGCGGGAGGACCGGGG	0	1
MUC5B	chr11	1248182	1248210	rs1392099847	1248183	G	A	0.796381	GGGCCAGGGCTGGGGGGGGGTTGGGTGGG	GGACCAGGGCTGGGGGGGGGTTGGGTGGG	0	1
ENPP1	chr6	132129444	132129468	rs1395087574	132129456	G	C	0.796381	GGGAGGGCTGGGAGTACGGGGAGGG	GGGAGGGCTGGGACTACGGGGAGGG	0	1
ESRRB	chr14	76793219	76793240	rs1395560885	76793220	G	A	0.796381	GGGCATAGGGAGGGCTCCAGGG	GGACATAGGGAGGGCTCCAGGG	0	1
ITPR1	chr3	4862578	4862603	rs1395831429	4862587	G	A	0.796381	GGGGGTGGGGGCTGGGGCCCCATGGG	GGGGGTGGGGACTGGGGCCCCATGGG	0	1
CNGA3	chr2	98999748	98999770	rs1396456084	98999751	T	C	0.796381	GGGATAGGGATTGGGGGGTGGGG	GGGACAGGGATTGGGGGGTGGGG	0	1
EIF2B5	chr3	184080764	184080788	rs1396580038	184080766	G	A	0.796381	GGGGCTGGGCACCTCTGGGGCGGGG	GGGACTGGGCACCTCTGGGGCGGGG	0	1
DYSF	chr2	71740772	71740794	rs1397375861	71740787	G	A	0.796381	GGGCTGGGTCCCAGGGGCAGGGG	GGGCTGGGTCCCAGGGACAGGGG	0	1
BEAN1	chr16	66523833	66523857	rs1397442082	66523851	G	A	0.796381	GGGGGCAGGGGAGTTGGGAGCAGGG	GGGGGCAGGGGAGTTGGGAACAGGG	0	1
DPP10	chr2	115371535	115371563	rs1398412250	115371536	G	A	0.796381	GGGCCTGTCGGGGGTTGGGGGCCCAGGGG	GGACCTGTCGGGGGTTGGGGGCCCAGGGG	0	1
NCF4	chr22	37264688	37264715	rs1398706828	37264696	G	A	0.796381	GGGGAGTGGGCTGTGAAGGGAGGGAGGG	GGGGAGTGGACTGTGAAGGGAGGGAGGG	0	1
PTPRQ	chr12	81069549	81069576	rs1398970973	81069558	T	C	0.796381	GGGATGGGGATTTAGGGGTGGGGCAGGG	GGGATGGGGACTTAGGGGTGGGGCAGGG	0	1
THRA	chr17	38247356	38247380	rs1399587955	38247365	G	A	0.796381	GGGGATTGGGGCAGGGGGTGGGGGG	GGGGATTGGGACAGGGGGTGGGGGG	0	1
FOXP2	chr7	114151250	114151278	rs1399737592	114151251	G	A	0.796381	GGGCCTGTCAGGGGGTGGGGGGCTAGGGG	GGACCTGTCAGGGGGTGGGGGGCTAGGGG	0	1
CDH15	chr16	89241372	89241390	rs1399813584	89241376	G	A	0.796381	GGGACGGGGATGGGGTGGG	GGGACAGGGATGGGGTGGG	0	1
POLD1	chr19	50920082	50920103	rs1400029316	50920090	G	A	0.796381	GGGCCCAGGGCCCCTGGGTGGG	GGGCCCAGGACCCCTGGGTGGG	0	1
MYO9B	chr19	17320622	17320646	rs1400177607	17320638	G	A	0.796381	GGGTCTTGGTGGGCGGGGCCTTGGG	GGGTCTTGGTGGGCGGGACCTTGGG	0	1
AQP1	chr7	30963272	30963299	rs1400904128	30963281	G	A	0.796381	GGGGGCAGGGGCAGGGGCGGGCGGAGGG	GGGGGCAGGGACAGGGGCGGGCGGAGGG	0	1
MCPH1	chr8	6301228	6301249	rs1401178709	6301241	T	A	0.796381	GGGCAGTGGGAGGGTCCCAGGG	GGGCAGTGGGAGGGACCCAGGG	0	1
COL18A1	chr21	46927060	46927084	rs1401340070	46927070	G	A	0.796381	GGGCTGGGAGGGCCGGGTGTTGGGG	GGGCTGGGAGGACCGGGTGTTGGGG	0	1
MEIS1	chr2	66666632	66666655	rs1402503440	66666641	G	A	0.796381	GGGGACGAGGGCTTGTCGGGTGGG	GGGGACGAGGACTTGTCGGGTGGG	0	1
OPA1	chr3	193311092	193311117	rs1404541593	193311100	G	A	0.796381	GGGAGCCGGGCTGGGGCTCACACGGG	GGGAGCCGGACTGGGGCTCACACGGG	0	1
RBBP8	chr18	20567246	20567270	rs1404767562	20567249	T	A	0.796381	GGGGTACAGGGGAAGGTAGGGAGGG	GGGGAACAGGGGAAGGTAGGGAGGG	0	1
ADCK3	chr1	227164363	227164384	rs1405750578	227164364	G	A	0.796381	GGGCTCCTGGGCAGGGGTGGGG	GGACTCCTGGGCAGGGGTGGGG	0	1
SLC6A19	chr5	1203525	1203548	rs1405918575	1203533	G	A	0.796381	GGGCAGCGGGCAGCGGGCAGCGGG	GGGCAGCGGACAGCGGGCAGCGGG	0	1
ADCK3	chr1	227169148	227169177	rs1406018810	227169174	G	A	0.796381	GGGCCTCTGTGGGTGGACGGGAGAGACGGG	GGGCCTCTGTGGGTGGACGGGAGAGACAGG	0	1
PACRG	chr6	163321014	163321046	rs1406249299	163321037	G	A	0.796381	GGGAAGGTCAGGGAGCTGCAGGGAGCAAAAGGG	GGGAAGGTCAGGGAGCTGCAGGGAACAAAAGGG	0	1
WBSCR22	chr7	73117355	73117379	rs1407070882	73117362	G	A	0.796381	GGGGCAGGGCAGAGGGCCGAGGGGG	GGGGCAGGACAGAGGGCCGAGGGGG	0	1
SMAD4	chr18	48610864	48610886	rs1408972175	48610866	G	A	0.796381	GGGGCTGGGTTGAGGGTGGGGGG	GGGACTGGGTTGAGGGTGGGGGG	0	1
CEP164	chr11	117255240	117255269	rs1409139759	117255244	G	A	0.796381	GGGAAGCCTGGGCAGCCGGGCTCAGTTGGG	GGGAAACCTGGGCAGCCGGGCTCAGTTGGG	0	1
RARA	chr17	38470438	38470462	rs1411328492	38470454	G	A	0.796381	GGGGTGGGGGTGGGGACGAGCTGGG	GGGGTGGGGGTGGGGACAAGCTGGG	0	1
EIF2B5	chr3	183958912	183958934	rs1411659344	183958925	G	A	0.796381	GGGAAAGGGTAGGGGCACTTGGG	GGGAAAGGGTAGGGACACTTGGG	0	1
TRIOBP	chr22	38135314	38135340	rs1413106354	38135323	G	A	0.796381	GGGCCGTGGGGCAGTGGGAGGTGGGGG	GGGCCGTGGGACAGTGGGAGGTGGGGG	0	1
TBXAS1	chr7	139477648	139477674	rs1414662728	139477659	G	A	0.796381	GGGGGGCTCGGGGCTCGGGGCTCGGGG	GGGGGGCTCGGGACTCGGGGCTCGGGG	0	1
HSF4	chr16	67198010	67198034	rs1414820541	67198021	G	A	0.796381	GGGAGAGGGAGGGCACGGGCGCGGG	GGGAGAGGGAGGACACGGGCGCGGG	0	1
TCIRG1	chr11	67809634	67809651	rs1414911483	67809635	G	A	0.796381	GGGCTGGGGTGGGTGGGG	GGACTGGGGTGGGTGGGG	0	1
DNAJB2	chr2	220149919	220149946	rs1416581902	220149935	G	A	0.796381	GGGTGGGGGGTGTCAGGGCAGTGGAGGG	GGGTGGGGGGTGTCAGGACAGTGGAGGG	0	1
OPTN	chr10	13142054	13142072	rs1417492508	13142066	C	A	0.796381	GGGATGGGCGGGGCCCGGG	GGGATGGGCGGGGACCGGG	0	1
DAGLA	chr11	61477804	61477830	rs1418501448	61477805	G	A	0.796381	GGGCAGATGGGCTTAAAGGGAGGGGGG	GGACAGATGGGCTTAAAGGGAGGGGGG	0	1
CAMTA1	chr1	7325066	7325097	rs1419806933	7325067	G	A	0.796381	GGGCCTGCAGGGGTGGGGAGGGAGCCTCAGGG	GGACCTGCAGGGGTGGGGAGGGAGCCTCAGGG	0	1
CHST3	chr10	73729931	73729949	rs1420597587	73729932	G	A	0.796381	GGGCAGGGTGGGCCCCGGG	GGACAGGGTGGGCCCCGGG	0	1
CDH23	chr10	73321618	73321642	rs1421609915	73321630	G	A	0.796381	GGGGAGGAGGGAAGCAGGGGTGGGG	GGGGAGGAGGGAAACAGGGGTGGGG	0	1
DPP6	chr7	154595359	154595386	rs1422620158	154595378	G	A	0.796381	GGGGGTCGGGGAGGCTGCGGGCCTGGGG	GGGGGTCGGGGAGGCTGCGGACCTGGGG	0	1
UVSSA	chr4	1368784	1368808	rs1424259259	1368786	G	A	0.796381	GGGGCTATGGGCACAGGGTGCCGGG	GGGACTATGGGCACAGGGTGCCGGG	0	1
ESPN	chr1	6491147	6491169	rs1424719977	6491148	G	A	0.796381	GGGCAGGGCTGTGGGGGTCAGGG	GGACAGGGCTGTGGGGGTCAGGG	0	1
CLN8	chr8	1712290	1712315	rs1425719235	1712308	G	A	0.796381	GGGGGAGCCCGGGTGAGGGGCCGGGG	GGGGGAGCCCGGGTGAGGGACCGGGG	0	1
CAPN10	chr2	241534295	241534316	rs1428929242	241534307	G	A	0.796381	GGGAGGAGGGTGGGCTTGTGGG	GGGAGGAGGGTGGACTTGTGGG	0	1
ATXN7	chr3	63897817	63897840	rs1430670759	63897827	G	A	0.796381	GGGGCAGCCGGGCCGGGCCCGGGG	GGGGCAGCCGGACCGGGCCCGGGG	0	1
SCN8A	chr12	52077774	52077792	rs1432051943	52077780	G	A	0.796381	GGGCAGGGCAGAGGGAGGG	GGGCAGGACAGAGGGAGGG	0	1
TUBB3	chr16	89998916	89998942	rs1432510723	89998934	G	A	0.796381	GGGAAAGGGCCTGGCTGGGGCTATGGG	GGGAAAGGGCCTGGCTGGGACTATGGG	0	1
LRRK2	chr12	40651720	40651751	rs1435009837	40651722	G	A	0.796381	GGGGCAGGGTGGGATGAGGTGGGGGTGAGGGG	GGGACAGGGTGGGATGAGGTGGGGGTGAGGGG	0	1
SEPN1	chr1	26126724	26126751	rs1435172502	26126725	G	A	0.796381	GGGCCGGGCCCGGCCGGGCCAACGCGGG	GGACCGGGCCCGGCCGGGCCAACGCGGG	0	1
RAD51B	chr14	69030758	69030786	rs1436033176	69030760	C	A	0.796381	GGGCCTGCATGGGCTGGGGGAGGCTGGGG	GGGACTGCATGGGCTGGGGGAGGCTGGGG	0	1
DNAH11	chr7	21821382	21821406	rs1436865698	21821397	T	C	0.796381	GGGGTATTTTGGGAGATTGGGAGGG	GGGGTATTTTGGGAGACTGGGAGGG	0	1
EPHA3	chr3	89196325	89196350	rs1437480305	89196327	C	A	0.796381	GGGCCTGTCGGGGGTGGGGGTAAGGG	GGGACTGTCGGGGGTGGGGGTAAGGG	0	1
OTOG	chr11	17579161	17579189	rs1438739011	17579163	G	A	0.796381	GGGGCATGGGGTAGGCAGGGAGCAGAGGG	GGGACATGGGGTAGGCAGGGAGCAGAGGG	0	1
NPAS2	chr2	101592721	101592743	rs1439761622	101592730	G	A	0.796381	GGGCTGGGTGGCTGAGGGCTGGG	GGGCTGGGTGACTGAGGGCTGGG	0	1
COG1	chr17	71195208	71195229	rs1441910807	71195211	C	A	0.796381	GGGGCCTTGGGAGGGCCCTGGG	GGGGACTTGGGAGGGCCCTGGG	0	1
TECR	chr19	14673396	14673422	rs1444221987	14673404	G	A	0.796381	GGGGCGTGGGCTGCACTGGGCCAAGGG	GGGGCGTGGACTGCACTGGGCCAAGGG	0	1
AGRN	chr1	985974	986006	rs1444779365	985988	G	A	0.796381	GGGCCGGCAAGGGTGGCTCTGGGAGGCCTGGGG	GGGCCGGCAAGGGTGACTCTGGGAGGCCTGGGG	0	1
ACADVL	chr17	7123637	7123666	rs1446163078	7123649	G	A	0.796381	GGGGAAAGGGCAAGCCAGGGTGCCCTAGGG	GGGGAAAGGGCAAACCAGGGTGCCCTAGGG	0	1
DAGLA	chr11	61453687	61453708	rs1448912413	61453702	G	C	0.796381	GGGGAAGGGGTGGGAAGTGGGG	GGGGAAGGGGTGGGAACTGGGG	0	1
NDUFAF5	chr20	13770473	13770501	rs1450322576	13770474	G	A	0.796381	GGGCCAGGGTGAGGAAGGGAGTGGTGGGG	GGACCAGGGTGAGGAAGGGAGTGGTGGGG	0	1
RYR1	chr19	38996867	38996892	rs1450460876	38996885	G	A	0.796381	GGGGCCTGGGGAGGGGCTGGCCTGGG	GGGGCCTGGGGAGGGGCTGACCTGGG	0	1
JAM3	chr11	134011335	134011364	rs1451842846	134011340	G	C	0.796381	GGGAGAGAGGGAGGAGAGGGGGGAGAGGGG	GGGAGACAGGGAGGAGAGGGGGGAGAGGGG	0	1
MAP2K1	chr15	66766408	66766434	rs1452069975	66766417	G	A	0.796381	GGGTTTGTGGGCCCTCTGGGTCAGGGG	GGGTTTGTGGACCCTCTGGGTCAGGGG	0	1
EPB41L1	chr20	34681817	34681834	rs1454394448	34681818	G	A	0.796381	GGGCTCTGGGTGGGTGGG	GGACTCTGGGTGGGTGGG	0	1
SLC39A13	chr11	47430094	47430118	rs1455684337	47430112	G	A	0.796381	GGGCGGCCCCGGGCCGGGGGCCGGG	GGGCGGCCCCGGGCCGGGGACCGGG	0	1
NCF4	chr22	37270681	37270703	rs1456435566	37270684	G	A	0.796381	GGGGGCAGAGGGGCAGGGAGGGG	GGGGACAGAGGGGCAGGGAGGGG	0	1
BCAM	chr19	45313334	45313356	rs1456982787	45313350	G	A	0.796381	GGGTCCCCAGGGGTAGGGCTGGG	GGGTCCCCAGGGGTAGGACTGGG	0	1
MOCOS	chr18	33781950	33781979	rs1457442475	33781959	G	A	0.796381	GGGGGCCAGGGCATGAATGGGCTGGGGGGG	GGGGGCCAGGACATGAATGGGCTGGGGGGG	0	1
SH3BP2	chr4	2812072	2812096	rs1458129514	2812073	G	A	0.796381	GGGCTGTGGGGGGAATGGGCCTGGG	GGACTGTGGGGGGAATGGGCCTGGG	0	1
GUCA1A	chr6	42126275	42126298	rs1461525470	42126288	G	A	0.796381	GGGCCTGGGCTAGGGCAGAAAGGG	GGGCCTGGGCTAGGACAGAAAGGG	0	1
MUC5B	chr11	1253627	1253649	rs1466398818	1253643	G	A	0.796381	GGGGTGTGGGCTTCGGGGCAGGG	GGGGTGTGGGCTTCGGGACAGGG	0	1
PACRG	chr6	163298457	163298485	rs1466784035	163298458	G	A	0.796381	GGGCCTGTTGGGAGGTTGGGGGCTAGGGG	GGACCTGTTGGGAGGTTGGGGGCTAGGGG	0	1
SORL1	chr11	121387136	121387162	rs1467230590	121387155	G	A	0.796381	GGGAGTCAGGGAGAGCTGGGGCAGGGG	GGGAGTCAGGGAGAGCTGGGACAGGGG	0	1
PDE8B	chr5	76506279	76506295	rs1467696815	76506292	G	A	0.796381	GGGAGGGAGGGGACGGG	GGGAGGGAGGGGACAGG	0	1
POLD1	chr19	50920832	50920853	rs1472280122	50920837	G	A	0.796381	GGGAACGGGTAGGCGGGGTGGG	GGGAACAGGTAGGCGGGGTGGG	0	1
RYR1	chr19	38998085	38998109	rs1472511503	38998101	G	A	0.796381	GGGCTGAGAAGGGCAGGGCCCGGGG	GGGCTGAGAAGGGCAGGACCCGGGG	0	1
GPHN	chr14	67562497	67562518	rs1472621772	67562508	G	A	0.796381	GGGGTGGGGGGAGCAGGGAGGG	GGGGTGGGGGGAACAGGGAGGG	0	1
ATP8A2	chr13	26042885	26042914	rs1473499809	26042887	G	A	0.796381	GGGGCCGCGCGGGGCGTGGGCGTGGGCGGG	GGGACCGCGCGGGGCGTGGGCGTGGGCGGG	0	1
KCNK3	chr2	26916090	26916116	rs1475056149	26916092	G	A	0.796381	GGGGCCGGCTGGGGCTGGGGGCGGGGG	GGGACCGGCTGGGGCTGGGGGCGGGGG	0	1
KRT18	chr12	53342752	53342774	rs1478922267	53342767	C	A	0.796381	GGGCGCGGGGGTGGGGCCCGGGG	GGGCGCGGGGGTGGGGACCGGGG	0	1
ACSF3	chr16	89207802	89207823	rs1478971631	89207803	G	A	0.796381	GGGCTGGGAGGGAAGCAGCGGG	GGACTGGGAGGGAAGCAGCGGG	0	1
MSX1	chr4	4862122	4862150	rs1479284352	4862140	G	A	0.796381	GGGAGGGGGCCGGGTGGGGGCCGGGTGGG	GGGAGGGGGCCGGGTGGGGACCGGGTGGG	0	1
PAX7	chr1	19041516	19041541	rs1480136322	19041526	G	A	0.796381	GGGATGGTTGGGCAATCGGGCCTGGG	GGGATGGTTGGACAATCGGGCCTGGG	0	1
HGSNAT	chr8	42995593	42995619	rs1480172586	42995612	G	A	0.796381	GGGCGGGGCGCAGCGGGCAGGCAAGGG	GGGCGGGGCGCAGCGGGCAGACAAGGG	0	1
GPR98	chr5	90439874	90439902	rs1481577263	90439877	G	C	0.796381	GGGAGCGGGCCTGCAGGGGCAGTGGGGGG	GGGACCGGGCCTGCAGGGGCAGTGGGGGG	0	1
IDUA	chr4	996952	996982	rs1482935643	996971	G	A	0.796381	GGGCCGCGGAGGGGCGAGGGGCCGGGCCGGG	GGGCCGCGGAGGGGCGAGGGACCGGGCCGGG	0	1
GLI2	chr2	121563833	121563859	rs1484232699	121563853	C	A	0.796381	GGGGGCTGTGGGGCACCCGGGCCTGGG	GGGGGCTGTGGGGCACCCGGGACTGGG	0	1
SPECC1L	chr22	24742591	24742614	rs1484302688	24742603	G	A	0.796381	GGGGGTTGGGGACGGGAAGAGGGG	GGGGGTTGGGGACAGGAAGAGGGG	0	1
EGFR	chr7	55151873	55151896	rs1485558543	55151881	T	A	0.796381	GGGTCAGGGTCTGGGTTCTCAGGG	GGGTCAGGGACTGGGTTCTCAGGG	0	1
SLC5A2	chr16	31500758	31500778	rs1486256173	31500770	G	A	0.796381	GGGTTGGGAATGGGCTGGGGG	GGGTTGGGAATGGACTGGGGG	0	1
SEMA4A	chr1	156129290	156129310	rs1486505803	156129291	G	A	0.796381	GGGCCCGGGAAGGGTATTGGG	GGACCCGGGAAGGGTATTGGG	0	1
KCNQ4	chr1	41257874	41257892	rs1488107766	41257886	G	A	0.796381	GGGAGGGGAGGGGGCAGGG	GGGAGGGGAGGGGACAGGG	0	1
SEPN1	chr1	26135419	26135444	rs1488609544	26135421	G	A	0.796381	GGGGCCCCTGGGCCGTCGGGTCTGGG	GGGACCCCTGGGCCGTCGGGTCTGGG	0	1
GPHN	chr14	67155621	67155650	rs1489586648	67155623	G	A	0.796381	GGGGCCTGTCGGGGGGTGGGGGGCTGGGGG	GGGACCTGTCGGGGGGTGGGGGGCTGGGGG	0	1
ATXN7	chr3	63980913	63980936	rs1490738331	63980918	G	A	0.796381	GGGAACGGGGGCGTTGGGGGTGGG	GGGAACAGGGGCGTTGGGGGTGGG	0	1
STIM1	chr11	4114289	4114312	rs201215981	4114290	G	A	0.796381	GGGCCTGGGGTGGGTATACCTGGG	GGACCTGGGGTGGGTATACCTGGG	0	1
SORL1	chr11	121475050	121475077	rs371654759	121475056	G	A	0.796381	GGGCTGGGCTGGGCTGGGCTGGGCTGGG	GGGCTGGACTGGGCTGGGCTGGGCTGGG	0	1
GOSR2	chr17	45054382	45054407	rs372099720	45054385	C	T	0.796381	GGGACGACCAGGGTTGGGGGATGGGG	GGGATGACCAGGGTTGGGGGATGGGG	0	1
GRK1	chr13	114324134	114324159	rs374774929	114324148	G	A	0.796381	GGGCTGGGCCAGAGGGCACGAGGGGG	GGGCTGGGCCAGAGGACACGAGGGGG	0	1
TBX4	chr17	59541637	59541666	rs376242875	59541649	G	A	0.796381	GGGCACAGGCGGGGCTGGGTGGGGCGTGGG	GGGCACAGGCGGGACTGGGTGGGGCGTGGG	0	1
STIM1	chr11	4114289	4114312	rs538191029	4114291	C	A	0.796381	GGGCCTGGGGTGGGTATACCTGGG	GGGACTGGGGTGGGTATACCTGGG	0	1
PLCB1	chr20	8175982	8176012	rs560138633	8176003	G	A	0.796381	GGGCCACTGAGGGGTGATTAGGGCATGGGGG	GGGCCACTGAGGGGTGATTAGGACATGGGGG	0	1
PNPLA2	chr11	823452	823483	rs753768228	823480	G	A	0.796381	GGGGGTGCCAGGGATTCCAGGGGCAGAACGGG	GGGGGTGCCAGGGATTCCAGGGGCAGAACAGG	0	1
CAPN3	chr15	42681303	42681325	rs767858015	42681312	G	A	0.796381	GGGGTGTGGGGCACAGGGTGGGG	GGGGTGTGGGACACAGGGTGGGG	0	1
CACNA1H	chr16	1265094	1265125	rs768802023	1265114	G	A	0.796381	GGGCCGTCTTGGGTTCTGGGGGCCCCTCAGGG	GGGCCGTCTTGGGTTCTGGGGACCCCTCAGGG	0	1
HFE	chr6	26093504	26093531	rs773301755	26093517	G	C	0.796381	GGGCACAGTGGGAAGAGGGGCAGAGGGG	GGGCACAGTGGGAACAGGGGCAGAGGGG	0	1
HOGA1	chr10	99344526	99344550	rs774752851	99344535	G	A	0.796381	GGGGGTCTGGGCCTCAGGGGAGGGG	GGGGGTCTGGACCTCAGGGGAGGGG	0	1
GHRHR	chr7	31011722	31011747	rs778901709	31011731	G	A	0.796381	GGGTGAAGGGGCTGGGCAGGTGGGGG	GGGTGAAGGGACTGGGCAGGTGGGGG	0	1
STX16	chr20	57226674	57226703	rs879295717	57226678	T	A	0.796381	GGGGGTCTCAGGGAGTAGGGGGCTTCAGGG	GGGGGACTCAGGGAGTAGGGGGCTTCAGGG	0	1
CACNA1D	chr3	53616482	53616509	rs886214779	53616499	G	A	0.796381	GGGGGTATAGGGAGCTGGGCAGGCAGGG	GGGGGTATAGGGAGCTGGACAGGCAGGG	0	1
EGFR	chr7	55198167	55198193	rs886764815	55198180	G	A	0.796381	GGGATTACAGGGTAGCCAGGGAAAGGG	GGGATTACAGGGTAACCAGGGAAAGGG	0	1
MTMR14	chr3	9731010	9731035	rs890604496	9731021	G	A	0.796381	GGGCAGGGTAGGGCAGGGGTCTGGGG	GGGCAGGGTAGGACAGGGGTCTGGGG	0	1
BCR	chr22	23604841	23604867	rs891207709	23604851	G	A	0.796381	GGGCAGCCAGGGCCGCTGGGTGTGGGG	GGGCAGCCAGGACCGCTGGGTGTGGGG	0	1
EPHB2	chr1	23060588	23060613	rs891927153	23060589	G	A	0.796381	GGGCCAGCCTGGGCTTGGGCAGGGGG	GGACCAGCCTGGGCTTGGGCAGGGGG	0	1
MEF2A	chr15	100106070	100106095	rs896223169	100106084	G	A	0.796381	GGGAGGGGAGGCAGGGCTGCGGAGGG	GGGAGGGGAGGCAGGACTGCGGAGGG	0	1
DNM2	chr19	10920538	10920562	rs896778180	10920559	G	A	0.796381	GGGCCATGGGTGGGGCAGTGACGGG	GGGCCATGGGTGGGGCAGTGACAGG	0	1
ESRRB	chr14	76793219	76793240	rs896828835	76793231	G	A	0.796381	GGGCATAGGGAGGGCTCCAGGG	GGGCATAGGGAGGACTCCAGGG	0	1
SLC35C1	chr11	45825717	45825744	rs896863818	45825738	C	A	0.796381	GGGTCCCGGGCGGGCGGGGGTACCAGGG	GGGTCCCGGGCGGGCGGGGGTAACAGGG	0	1
CRYBA4	chr22	27024423	27024444	rs898399199	27024430	G	A	0.796381	GGGGAGGGGCTACTGGGAGGGG	GGGGAGGGACTACTGGGAGGGG	0	1
SOBP	chr6	107886706	107886724	rs902317639	107886715	G	A	0.796381	GGGGAGGGACGGGGGTGGG	GGGGAGGGACAGGGGTGGG	0	1
KLHL10	chr17	39992253	39992283	rs906123417	39992272	G	A	0.796381	GGGCCCGAGGGGAGCCCGGGGCTCGCTCGGG	GGGCCCGAGGGGAGCCCGGGACTCGCTCGGG	0	1
LAMA3	chr18	21450786	21450807	rs908364291	21450801	A	C	0.796381	GGGGCTGGGGAGGGAAAAAGGG	GGGGCTGGGGAGGGAACAAGGG	0	1
FERMT3	chr11	63987499	63987520	rs909671972	63987507	G	A	0.796381	GGGCCAGGGGCTGGGTGGGGGG	GGGCCAGGGACTGGGTGGGGGG	0	1
SCN1B	chr19	35523605	35523630	rs912692971	35523617	G	A	0.796381	GGGTGCCGGGAACGGGCATGGGAGGG	GGGTGCCGGGAACAGGCATGGGAGGG	0	1
CAMTA1	chr1	7765570	7765593	rs915185319	7765586	G	A	0.796381	GGGCGCGCGCGGGCGGGGCTGGGG	GGGCGCGCGCGGGCGGGACTGGGG	0	1
CACNA1H	chr16	1225306	1225329	rs915646573	1225317	G	A	0.796381	GGGTTCTGGGGAGCCCCGGGAGGG	GGGTTCTGGGGAACCCCGGGAGGG	0	1
CTDP1	chr18	77441310	77441332	rs916447690	77441316	G	A	0.796381	GGGTGGGGCTGGGAGGTTCAGGG	GGGTGGGACTGGGAGGTTCAGGG	0	1
ATP1A2	chr1	160095467	160095487	rs920260700	160095468	G	A	0.796381	GGGCCCCAGGGTCTGGGAGGG	GGACCCCAGGGTCTGGGAGGG	0	1
MITF	chr3	69858056	69858084	rs920998230	69858077	G	A	0.796381	GGGATGGGTAGGGTGAAGTGGGGCTGGGG	GGGATGGGTAGGGTGAAGTGGGACTGGGG	0	1
NAT8L	chr4	2063421	2063447	rs923017478	2063428	G	A	0.796381	GGGTCTGGGCTCTAGGGGGGGTGGGGG	GGGTCTGGACTCTAGGGGGGGTGGGGG	0	1
KCNQ1	chr11	2756523	2756546	rs923256708	2756526	C	A	0.796381	GGGGCCCTGGGGTGGGAGGTGGGG	GGGGACCTGGGGTGGGAGGTGGGG	0	1
TPCN2	chr11	68856196	68856220	rs925805715	68856199	G	A	0.796381	GGGGGCCTGGGGTGGGGAGGTGGGG	GGGGACCTGGGGTGGGGAGGTGGGG	0	1
MYO9B	chr19	17214201	17214226	rs925891722	17214204	G	C	0.796381	GGGAGAGAGGGAAAAAGGGAGCGGGG	GGGACAGAGGGAAAAAGGGAGCGGGG	0	1
CCDC40	chr17	78057006	78057032	rs927756740	78057026	G	A	0.796381	GGGCAGTTGGGGAGGGGGGAGGCAGGG	GGGCAGTTGGGGAGGGGGGAGACAGGG	0	1
LDB3	chr10	88430488	88430509	rs930871186	88430494	G	A	0.796381	GGGCAGGGCACCGGGGGATGGG	GGGCAGGACACCGGGGGATGGG	0	1
RAD51B	chr14	68728635	68728663	rs931143187	68728640	G	A	0.796381	GGGGACGCTGGGTCAGGCAGGGAAGGGGG	GGGGACACTGGGTCAGGCAGGGAAGGGGG	0	1
ACADS	chr12	121176759	121176784	rs931944863	121176770	G	A	0.796381	GGGCCCAGGGACGGGGAGAGGTTGGG	GGGCCCAGGGACAGGGAGAGGTTGGG	0	1
PACRG	chr6	163271532	163271553	rs936644563	163271545	G	A	0.796381	GGGAGGGGAGAGGGGCTGAGGG	GGGAGGGGAGAGGGACTGAGGG	0	1
PEX26	chr22	18577929	18577956	rs937424147	18577949	G	A	0.796381	GGGCTGAAGGGTGGAGGTGGGGCAGGGG	GGGCTGAAGGGTGGAGGTGGGACAGGGG	0	1
JPH3	chr16	87725083	87725113	rs938608486	87725102	G	A	0.796381	GGGGCGCTCAGGGCGTGTGGGCCGGGCAGGG	GGGGCGCTCAGGGCGTGTGGACCGGGCAGGG	0	1
CDH23	chr10	73343114	73343143	rs940161358	73343116	G	A	0.796381	GGGGCCACCTGGGGGGTCTTGGGAGTGGGG	GGGACCACCTGGGGGGTCTTGGGAGTGGGG	0	1
ARHGEF10	chr8	1856780	1856805	rs941666304	1856787	T	C	0.796381	GGGTGGGATTTCCTGGGGCTGCGGGG	GGGTGGGACTTCCTGGGGCTGCGGGG	0	1
LARS2	chr3	45430257	45430283	rs941767137	45430258	G	A	0.796381	GGGCAGGAAGGGAAGGTGCGGGCTGGG	GGACAGGAAGGGAAGGTGCGGGCTGGG	0	1
PDE8B	chr5	76617872	76617903	rs945090067	76617897	G	A	0.796381	GGGAAGGCTTGGGTGAGGCAGGGTGAGCAGGG	GGGAAGGCTTGGGTGAGGCAGGGTGAACAGGG	0	1
CLN8	chr8	1733109	1733137	rs947029048	1733110	G	A	0.796381	GGGCCAGCCTGGGGTGGGGTCGGCCAGGG	GGACCAGCCTGGGGTGGGGTCGGCCAGGG	0	1
CHRNB1	chr17	7350295	7350323	rs950296052	7350298	C	A	0.796381	GGGGCCTCGGGGGGCGGGGGGCCTCCGGG	GGGGACTCGGGGGGCGGGGGGCCTCCGGG	0	1
CACNA1D	chr3	53723497	53723523	rs951216298	53723507	G	A	0.796381	GGGGGCTGGGGGCTGGGGGCTGCAGGG	GGGGGCTGGGGACTGGGGGCTGCAGGG	0	1
EPHX1	chr1	226028091	226028118	rs953572352	226028109	G	A	0.796381	GGGGAGAGGGTGCCCTGGGGCCTTGGGG	GGGGAGAGGGTGCCCTGGGACCTTGGGG	0	1
BMPR1B	chr4	95894747	95894766	rs954343042	95894759	C	A	0.796381	GGGCAGGGTGGGGCCATGGG	GGGCAGGGTGGGGACATGGG	0	1
CTNS	chr17	3540313	3540336	rs956975285	3540315	G	A	0.796381	GGGGCAGCGGGCTGCCGGGGTGGG	GGGACAGCGGGCTGCCGGGGTGGG	0	1
GIGYF2	chr2	233629249	233629277	rs963451778	233629267	G	A	0.796381	GGGCAGAGTGGGGAGGAGGGCTTATAGGG	GGGCAGAGTGGGGAGGAGGACTTATAGGG	0	1
POLD1	chr19	50894945	50894972	rs963881572	50894967	G	C	0.796381	GGGGGGAGGGGGAGGGGGAGGGAGAGGG	GGGGGGAGGGGGAGGGGGAGGGACAGGG	0	1
DIS3L2	chr2	233060156	233060177	rs964353801	233060157	G	A	0.796381	GGGCAGGGGCTAGGGAATGGGG	GGACAGGGGCTAGGGAATGGGG	0	1
SCNN1G	chr16	23194638	23194657	rs965553659	23194643	G	A	0.796381	GGGAGGGCAGGGCTGCGGGG	GGGAGGACAGGGCTGCGGGG	0	1
STAMBP	chr2	74090759	74090782	rs968542813	74090772	G	A	0.796381	GGGTGGGTCTGGGGGCCAGCTGGG	GGGTGGGTCTGGGGACCAGCTGGG	0	1
JPH3	chr16	87659396	87659423	rs969449673	87659420	G	A	0.796381	GGGGTGGGGAGGGAAGTGCAGGGACGGG	GGGGTGGGGAGGGAAGTGCAGGGACAGG	0	1
ALPL	chr1	21874757	21874780	rs973106364	21874766	T	A	0.796381	GGGGGAGGGGTCCTAGGGGTGGGG	GGGGGAGGGGACCTAGGGGTGGGG	0	1
GNA11	chr19	3113592	3113617	rs978132061	3113611	C	A	0.796381	GGGGGCAGGGATGCGGTGGGCCCGGG	GGGGGCAGGGATGCGGTGGGACCGGG	0	1
CD81	chr11	2399238	2399261	rs983060672	2399252	G	A	0.796381	GGGGACGAGGGGGGGGCTCGCGGG	GGGGACGAGGGGGGGACTCGCGGG	0	1
MRPS22	chr3	139025644	139025670	rs983195764	139025653	C	A	0.796381	GGGGAGGGGGCCAGGGGCGAGATGGGG	GGGGAGGGGGACAGGGGCGAGATGGGG	0	1
CHST14	chr15	40763483	40763510	rs985415192	40763499	G	A	0.796381	GGGCCCCTCTGGGCAGGGCCCGGGCGGG	GGGCCCCTCTGGGCAGGACCCGGGCGGG	0	1
ITCH	chr20	33063504	33063525	rs988191707	33063518	G	A	0.796381	GGGGCAGGGGCAGGGGCAGGGG	GGGGCAGGGGCAGGGACAGGGG	0	1
NAT8L	chr4	2069408	2069436	rs994806450	2069416	G	A	0.796381	GGGCAGGGGGCTGTGTGGGCCCTCGTGGG	GGGCAGGGGACTGTGTGGGCCCTCGTGGG	0	1
TENM3	chr4	183600202	183600230	rs999190222	183600203	G	A	0.796381	GGGCCTGTCAGGGTGTCAGGGGCTAGGGG	GGACCTGTCAGGGTGTCAGGGGCTAGGGG	0	1
PACS1	chr11	66010509	66010532	rs375232816	66010514	G	A	0.796426	GGGCAGGCAGGGCCGGGAGGAGGG	GGGCAGACAGGGCCGGGAGGAGGG	0	1
FKBP10	chr17	39975671	39975688	rs1209820485	39975682	G	A	0.797334	GGGAGGGCGGGGGCTGGG	GGGAGGGCGGGGACTGGG	0	1
MFN2	chr1	12066771	12066798	rs773963246	12066789	G	A	0.799041	GGGAAGGTGGGGGCGGAGGGCAGGTGGG	GGGAAGGTGGGGGCGGAGGACAGGTGGG	0	1
INF2	chr14	105169560	105169582	rs771875521	105169575	G	A	0.804505	GGGCGGCAGGGCCTGGGCCTGGG	GGGCGGCAGGGCCTGGACCTGGG	0	1
CC2D1A	chr19	14040981	14041006	rs775438485	14040998	G	A	0.805082	GGGCCGGGTGGGCACTGGGCAGCGGG	GGGCCGGGTGGGCACTGGACAGCGGG	0	1
ICAM1	chr19	10395004	10395033	rs1394352878	10395022	G	A	0.814147	GGGGCAGGGGCGGAGTGGGGCTTCTTGGGG	GGGGCAGGGGCGGAGTGGGACTTCTTGGGG	0	1
BMP1	chr8	22035473	22035494	rs374662156	22035479	G	A	0.814399	GGGAGACGGGATTGGGGCTGGG	GGGAGACAGGATTGGGGCTGGG	0	1
BCAM	chr19	45316626	45316653	rs745774815	45316630	G	A	0.823642	GGGACGTGGGCTGGGGTGGGTGGCGGGG	GGGACATGGGCTGGGGTGGGTGGCGGGG	0	1
SLC5A2	chr16	31496073	31496096	rs754104422	31496079	G	A	0.826037	GGGCTGGGCCGGGAACGGGAGGGG	GGGCTGGACCGGGAACGGGAGGGG	0	1
CSF2RB	chr22	37319422	37319445	rs777557495	37319438	G	A	0.827424	GGGGGCAGGGGCCACGGGCAGGGG	GGGGGCAGGGGCCACGGACAGGGG	0	1
CAPN10	chr2	241534618	241534645	rs747887998	241534634	G	A	0.830289	GGGCAGGCCGGGCCCGGGCACTGGTGGG	GGGCAGGCCGGGCCCGGACACTGGTGGG	0	1
LDLR	chr19	11216281	11216305	rs1161038114	11216287	G	A	0.832265	GGGCGGGGCCAGGGTGGGGGCGGGG	GGGCGGGACCAGGGTGGGGGCGGGG	0	1
AP5Z1	chr7	4826068	4826094	rs751910849	4826069	G	A	0.832515	GGGCATCCCTGGGTGCCAGGGCAGGGG	GGACATCCCTGGGTGCCAGGGCAGGGG	0	1
GNAT1	chr3	50231107	50231133	rs914613406	50231108	G	A	0.844866	GGGCAGCGCGGGGCGCGGGGCGCGGGG	GGACAGCGCGGGGCGCGGGGCGCGGGG	0	1
TCF7L2	chr10	114911663	114911690	rs200561470	114911666	G	C	0.869006	GGGAGAAGCGGGGGGCGGGTGGTGAGGG	GGGACAAGCGGGGGGCGGGTGGTGAGGG	0	1
GATA6	chr18	19756849	19756871	rs1187629351	19756868	G	C	0.872661	GGGGTGACGCGGGGAGGGACGGG	GGGGTGACGCGGGGAGGGACCGG	0	1
ELMOD3	chr2	85617135	85617163	rs773540331	85617147	G	A	0.874585	GGGAATGGTGGGGGCATCCTGGGTTTGGG	GGGAATGGTGGGGACATCCTGGGTTTGGG	0	1
CYP4F22	chr19	15636392	15636409	rs1300379871	15636403	G	A	0.888383	GGGCTGGGCTGGGCTGGG	GGGCTGGGCTGGACTGGG	0	1
TPCN2	chr11	68825832	68825857	rs1246235775	68825842	G	A	0.95706	GGGCAGGGGACGGGGGAGAGATGGGG	GGGCAGGGGACAGGGGAGAGATGGGG	0	1
FLNB	chr3	58155543	58155570	rs755601227	58155560	G	A	1.04351	GGGTGGGGTGGGGCAGGGGCAGGCTGGG	GGGTGGGGTGGGGCAGGGACAGGCTGGG	0	1
TPO	chr2	1481384	1481415	rs1429724972	1481389	T	A	1.05659	GGGTGGTCCTGGGCGCCCTGGGTGGCTGCGGG	GGGTGGACCTGGGCGCCCTGGGTGGCTGCGGG	0	1
SLC5A5	chr19	17983219	17983243	rs764619381	17983220	G	A	1.14818	GGGCTGTGGGTCGGGCTGGCTCGGG	GGACTGTGGGTCGGGCTGGCTCGGG	0	1
COL6A2	chr21	47535785	47535814	rs1238745727	47535808	G	A	1.20363	GGGTGCCAAGGGCAACATGGGTGAGCCGGG	GGGTGCCAAGGGCAACATGGGTGAACCGGG	0	1
CC2D1A	chr19	14024461	14024483	rs774877802	14024462	G	A	1.27894	GGGCAGGGCCGGGCTGATATGGG	GGACAGGGCCGGGCTGATATGGG	0	1
FLI1	chr11	128634750	128634778	rs753710444	128634758	G	A	1.29968	GGGAGGAGGGCCAGCTGGGCAAGTGTGGG	GGGAGGAGGACCAGCTGGGCAAGTGTGGG	0	1
MED25	chr19	50340044	50340073	rs764481156	50340063	G	A	1.32388	GGGCCCTCCTGGGCCCAAGGGCCTACTGGG	GGGCCCTCCTGGGCCCAAGGACCTACTGGG	0	1
MESP2	chr15	90320122	90320143	rs1405678327	90320130	G	A	1.34953	GGGGCAGGGGCAAGGGCAGGGG	GGGGCAGGGACAAGGGCAGGGG	0	1
CACNA1H	chr16	1263934	1263964	rs748463877	1263955	G	A	1.42784	GGGTGCGAGGGGGCCGCGAGGGGCCCAGGGG	GGGTGCGAGGGGGCCGCGAGGGACCCAGGGG	0	1
CTSA	chr20	44519558	44519577	rs762167511	44519569	G	A	1.56326	GGGTGGGAGGGGGCTCCGGG	GGGTGGGAGGGGACTCCGGG	0	1
DYSF	chr2	71730061	71730087	rs1001681559	71730076	G	A	1.59276	GGGCCTCTGGGGAGGGGCAGGAAGGGG	GGGCCTCTGGGGAGGGACAGGAAGGGG	0	1
DPP6	chr7	153640592	153640608	rs1001834214	153640602	G	A	1.59276	GGGAGGGCAGGGCTGGG	GGGAGGGCAGGACTGGG	0	1
PEX26	chr22	18568075	18568096	rs1011550752	18568081	G	A	1.59276	GGGCTGGGCCTGTGGGAGTGGG	GGGCTGGACCTGTGGGAGTGGG	0	1
XPNPEP3	chr22	41363388	41363407	rs1012612870	41363390	G	A	1.59276	GGGGCAGGAGGGTGGGAGGG	GGGACAGGAGGGTGGGAGGG	0	1
MEGF8	chr19	42878967	42878992	rs1014248011	42878970	G	A	1.59276	GGGGGCTAGGGCTGTTGGGGAGTGGG	GGGGACTAGGGCTGTTGGGGAGTGGG	0	1
RAD51B	chr14	68950195	68950218	rs1015319744	68950203	T	C	1.59276	GGGAAGGGATAGTGGGTTCAAGGG	GGGAAGGGACAGTGGGTTCAAGGG	0	1
CDH1	chr16	68781260	68781285	rs1018808554	68781262	C	A	1.59276	GGGCCAGGGTACCTCTGGGCCTTGGG	GGGACAGGGTACCTCTGGGCCTTGGG	0	1
ALDH3A2	chr17	19557720	19557750	rs1019106597	19557733	G	A	1.59276	GGGGCGGGGTGGGGGCCTTGGGCATGGCGGG	GGGGCGGGGTGGGGACCTTGGGCATGGCGGG	0	1
TECPR2	chr14	102968554	102968579	rs1025443151	102968567	G	C	1.59276	GGGAGAAAGGGAGAGAAGGGGGAGGG	GGGAGAAAGGGAGACAAGGGGGAGGG	0	1
HSPB8	chr12	119655288	119655318	rs1026904066	119655290	G	A	1.59276	GGGGCTCAGAGGGGCACACAGGGGTTGAGGG	GGGACTCAGAGGGGCACACAGGGGTTGAGGG	0	1
SMAD6	chr15	67038675	67038700	rs1027370214	67038688	G	A	1.59276	GGGGCATGTGGGACGTGTGGGCTGGG	GGGGCATGTGGGACATGTGGGCTGGG	0	1
CACNA1H	chr16	1226666	1226697	rs1029238830	1226669	G	A	1.59276	GGGGGCTGATGGGGGTCCGGGGGCCGGCTGGG	GGGGACTGATGGGGGTCCGGGGGCCGGCTGGG	0	1
NDUFAF2	chr5	60241592	60241616	rs1038183775	60241594	G	A	1.59276	GGGGCTAGAAGGGCCAGGGGAGGGG	GGGACTAGAAGGGCCAGGGGAGGGG	0	1
SLC24A4	chr14	92805967	92805994	rs1039262600	92805972	G	A	1.59276	GGGAACGGTGGGCGCGGGTGGGTATGGG	GGGAACAGTGGGCGCGGGTGGGTATGGG	0	1
CAMTA1	chr1	7576459	7576489	rs1041577338	7576479	G	A	1.59276	GGGCCGTGGAGGGCAGCTGGGGCAGCCAGGG	GGGCCGTGGAGGGCAGCTGGGACAGCCAGGG	0	1
RIN2	chr20	19976331	19976357	rs1045989235	19976341	G	C	1.59276	GGGGGGGGTAAGAAAGGGAATCAAGGG	GGGGGGGGTAACAAAGGGAATCAAGGG	0	1
ZBTB16	chr11	114053847	114053869	rs1046682008	114053860	G	C	1.59276	GGGTGGGCGTGGGAGTACTGGGG	GGGTGGGCGTGGGACTACTGGGG	0	1
MEGF8	chr19	42841025	42841053	rs1046912846	42841045	C	A	1.59276	GGGGCGGGATGGGCTTCAGGGCCCAAGGG	GGGGCGGGATGGGCTTCAGGGACCAAGGG	0	1
JPH3	chr16	87704461	87704484	rs1050105346	87704474	G	A	1.59276	GGGGGAATGGGGACGGGAGGGGGG	GGGGGAATGGGGACAGGAGGGGGG	0	1
RARA	chr17	38469623	38469655	rs1050951803	38469634	G	A	1.59276	GGGAAAGTTGGGGCAAGTTGGGGTGTGTATGGG	GGGAAAGTTGGGACAAGTTGGGGTGTGTATGGG	0	1
PDE6B	chr4	645278	645303	rs1054879473	645286	G	A	1.59276	GGGAGGGACGCAGAGGGCGCAGAGGG	GGGAGGGACACAGAGGGCGCAGAGGG	0	1
SLC6A19	chr5	1215118	1215147	rs1057187636	1215132	G	C	1.59276	GGGCTTGTGGGCAGAGAGGGTGTTGGAGGG	GGGCTTGTGGGCAGACAGGGTGTTGGAGGG	0	1
PCNT	chr21	47775965	47775989	rs1157725889	47775980	G	A	1.59276	GGGCACGGGGCACAGGGCTGTGGGG	GGGCACGGGGCACAGGACTGTGGGG	0	1
DAGLA	chr11	61475337	61475360	rs1160381748	61475343	G	A	1.59276	GGGCTGGGCAGGGCGGGGTAGGGG	GGGCTGGACAGGGCGGGGTAGGGG	0	1
CACNA1H	chr16	1234644	1234667	rs1160416316	1234656	G	A	1.59276	GGGTGGGTCTGGGGCATGTGAGGG	GGGTGGGTCTGGGACATGTGAGGG	0	1
HGSNAT	chr8	42995593	42995619	rs1165264908	42995608	G	A	1.59276	GGGCGGGGCGCAGCGGGCAGGCAAGGG	GGGCGGGGCGCAGCGGACAGGCAAGGG	0	1
COL4A2	chr13	111159497	111159521	rs1165486891	111159505	G	A	1.59276	GGGGGTGACGGGAAGGGTCTCTGGG	GGGGGTGACAGGAAGGGTCTCTGGG	0	1
SLC22A18	chr11	2944018	2944043	rs1167455491	2944023	G	A	1.59276	GGGCAGGCCAGGGGCCTGGGAGGGGG	GGGCAGACCAGGGGCCTGGGAGGGGG	0	1
CDT1	chr16	88870141	88870166	rs1169035520	88870149	G	A	1.59276	GGGGGCGGGGCCAGGGCGCCCGCGGG	GGGGGCGGGACCAGGGCGCCCGCGGG	0	1
ALG1	chr16	5134063	5134086	rs1172791732	5134077	G	C	1.59276	GGGCGGGCAAAGGGAGCTTCTGGG	GGGCGGGCAAAGGGACCTTCTGGG	0	1
IL17RA	chr22	17586661	17586684	rs1176019964	17586663	G	A	1.59276	GGGGCTGGGGAGCAGGGCTGGGGG	GGGACTGGGGAGCAGGGCTGGGGG	0	1
DNMT3B	chr20	31365612	31365636	rs1183393772	31365631	A	C	1.59276	GGGTCAGGGCTTGGGAGAAAAAGGG	GGGTCAGGGCTTGGGAGAAACAGGG	0	1
DNAJC5	chr20	62526882	62526910	rs1192338726	62526904	G	A	1.59276	GGGGCCTGCGGGAGCCGGGCCGGGCCGGG	GGGGCCTGCGGGAGCCGGGCCGGACCGGG	0	1
DNAH11	chr7	21740576	21740598	rs1192688055	21740586	G	A	1.59276	GGGGGTGGAGGGCTAGGGGAGGG	GGGGGTGGAGGACTAGGGGAGGG	0	1
OTOG	chr11	17579161	17579189	rs1194439918	17579174	G	A	1.59276	GGGGCATGGGGTAGGCAGGGAGCAGAGGG	GGGGCATGGGGTAGACAGGGAGCAGAGGG	0	1
C10orf11	chr10	77727508	77727539	rs1200666323	77727528	G	A	1.59276	GGGAGAGGAGGGAGGCGGCGGGCAGGGGTGGG	GGGAGAGGAGGGAGGCGGCGGACAGGGGTGGG	0	1
FIP1L1	chr4	54806439	54806466	rs1204872172	54806460	T	C	1.59276	GGGTCTGTGGGGAGGTGGGGGATAGGGG	GGGTCTGTGGGGAGGTGGGGGACAGGGG	0	1
EPHB2	chr1	23186966	23186994	rs1209125515	23186977	G	A	1.59276	GGGCGGCTTAGGGCAGGGGCAGCCTGGGG	GGGCGGCTTAGGACAGGGGCAGCCTGGGG	0	1
ROBO2	chr3	77675713	77675733	rs1210171450	77675719	G	A	1.59276	GGGTAACGGGGAGGGAGAGGG	GGGTAACAGGGAGGGAGAGGG	0	1
DYNC2H1	chr11	103137090	103137117	rs1216953214	103137091	G	A	1.59276	GGGCAGGGCCCCTGTGGGTGCAGGTGGG	GGACAGGGCCCCTGTGGGTGCAGGTGGG	0	1
TTC7A	chr2	47301113	47301134	rs1223885617	47301118	G	A	1.59276	GGGAACGTGGGTCAGGGTGGGG	GGGAACATGGGTCAGGGTGGGG	0	1
PAX2	chr10	102504806	102504828	rs1225608348	102504821	G	A	1.59276	GGGTGGTGGGGTTGGGGCTAGGG	GGGTGGTGGGGTTGGGACTAGGG	0	1
RAI1	chr17	17665224	17665249	rs1227438136	17665242	G	A	1.59276	GGGCCCAGCAGGGAGGGAGGCATGGG	GGGCCCAGCAGGGAGGGAGACATGGG	0	1
GLIS2	chr16	4371146	4371171	rs1227622951	4371148	G	A	1.59276	GGGGCTGGGGGCCAGGGCTGGGAGGG	GGGACTGGGGGCCAGGGCTGGGAGGG	0	1
KCNQ1	chr11	2812927	2812957	rs1228367324	2812948	C	A	1.59276	GGGTGGGGGTGGGGGGCCCGGGCCTCCCGGG	GGGTGGGGGTGGGGGGCCCGGGACTCCCGGG	0	1
AGRN	chr1	969393	969422	rs1235141132	969405	G	A	1.59276	GGGGACGAGGGGAGCTGGAGGGAGCCCGGG	GGGGACGAGGGGAACTGGAGGGAGCCCGGG	0	1
CD55	chr1	207528660	207528687	rs1238868283	207528661	G	A	1.59276	GGGCAGGGTTGGTGGGGGTGGTGGTGGG	GGACAGGGTTGGTGGGGGTGGTGGTGGG	0	1
XPNPEP3	chr22	41261696	41261716	rs1241461586	41261708	G	A	1.59276	GGGGGGCGGGGGGGCAGCGGG	GGGGGGCGGGGGGACAGCGGG	0	1
TRIOBP	chr22	38147939	38147958	rs1242601490	38147947	G	A	1.59276	GGGGGTGGGGCTGGGAGGGG	GGGGGTGGGACTGGGAGGGG	0	1
ATXN10	chr22	46211205	46211231	rs1243348835	46211225	G	A	1.59276	GGGGTAGAAGGGTAGGGATTGGCAGGG	GGGGTAGAAGGGTAGGGATTGACAGGG	0	1
EFHC1	chr6	52363083	52363108	rs1246285897	52363088	G	A	1.59276	GGGCGGGCAAGGGGTAGGGGAGAGGG	GGGCGGACAAGGGGTAGGGGAGAGGG	0	1
PPOX	chr1	161146246	161146278	rs1247783752	161146257	G	A	1.59276	GGGATCATGGGGGCTCCAGGGGGTCCCGGGGGG	GGGATCATGGGGACTCCAGGGGGTCCCGGGGGG	0	1
GLIS2	chr16	4367192	4367214	rs1260959869	4367206	G	A	1.59276	GGGATGCTGGGAGGGGCCCTGGG	GGGATGCTGGGAGGGACCCTGGG	0	1
THRA	chr17	38222007	38222033	rs1261976447	38222009	G	A	1.59276	GGGGCTGGGAATGGGGGAAGGGGGGGG	GGGACTGGGAATGGGGGAAGGGGGGGG	0	1
LDB3	chr10	88440592	88440617	rs1269327657	88440599	T	C	1.59276	GGGGCAGATTGGGCAGGGCAGTGGGG	GGGGCAGACTGGGCAGGGCAGTGGGG	0	1
ALPL	chr1	21890720	21890752	rs1273020587	21890723	G	A	1.59276	GGGGGCAGCCGGGCAGGGACGGGGTGAGGCGGG	GGGGACAGCCGGGCAGGGACGGGGTGAGGCGGG	0	1
COMT	chr22	19947099	19947125	rs1276992523	19947112	G	A	1.59276	GGGAGGTGGGGTGGGCAGGGGCCAGGG	GGGAGGTGGGGTGGACAGGGGCCAGGG	0	1
FOXP2	chr7	114279622	114279644	rs1283484835	114279637	G	A	1.59276	GGGAGGGTGGGGAGGGGCAGGGG	GGGAGGGTGGGGAGGGACAGGGG	0	1
ADAT3	chr19	1905589	1905613	rs1283710033	1905594	G	A	1.59276	GGGCGGGCCGGTGGGCGACGCGGGG	GGGCGGACCGGTGGGCGACGCGGGG	0	1
FARS2	chr6	5727425	5727443	rs1286518565	5727431	G	A	1.59276	GGGGTGGGCATGGGAGGGG	GGGGTGGACATGGGAGGGG	0	1
MYO7A	chr11	76849135	76849165	rs1294976466	76849149	G	C	1.59276	GGGATTCCGGGCAAAGTGGGGCTGTGGGGGG	GGGATTCCGGGCAAACTGGGGCTGTGGGGGG	0	1
CLPP	chr19	6361812	6361833	rs1296205574	6361815	G	A	1.59276	GGGGGCTCCGGGCTGGGTGGGG	GGGGACTCCGGGCTGGGTGGGG	0	1
PRCD	chr17	74538719	74538743	rs1296826073	74538732	G	A	1.59276	GGGCAGGGCTGGGAGCCGGGGAGGG	GGGCAGGGCTGGGAACCGGGGAGGG	0	1
AMPD3	chr11	10519123	10519148	rs1301275384	10519140	G	A	1.59276	GGGAGCCCGAGGGCTGGGGCACGGGG	GGGAGCCCGAGGGCTGGGACACGGGG	0	1
TG	chr8	133945713	133945737	rs1304796434	133945723	G	A	1.59276	GGGCATGTGGGGCAGGGGCAGGGGG	GGGCATGTGGGACAGGGGCAGGGGG	0	1
MYO7A	chr11	76841001	76841029	rs1304897941	76841016	G	A	1.59276	GGGCCTAGCGGGGCGGGCCCGGGCCCGGG	GGGCCTAGCGGGGCGGACCCGGGCCCGGG	0	1
CA4	chr17	58235549	58235572	rs1306395687	58235566	G	A	1.59276	GGGGTGGGTGTGCGGGGAGCTGGG	GGGGTGGGTGTGCGGGGAACTGGG	0	1
RAI1	chr17	17710502	17710529	rs1307211141	17710510	G	T	1.59276	GGGGAGGACGGGCGCTTGGGGTGCAGGG	GGGGAGGACTGGCGCTTGGGGTGCAGGG	0	1
GHRHR	chr7	31023551	31023571	rs1309302800	31023561	T	A	1.59276	GGGAGGGAGGGTCATGGCGGG	GGGAGGGAGGGACATGGCGGG	0	1
DNMT3B	chr20	31368603	31368622	rs1309694523	31368604	G	A	1.59276	GGGCTGGGGTTGGGAGGGGG	GGACTGGGGTTGGGAGGGGG	0	1
TP63	chr3	189404498	189404520	rs1311161567	189404508	G	A	1.59276	GGGGGTGGGGGGCAGGGGCAGGG	GGGGGTGGGGGACAGGGGCAGGG	0	1
TUBB3	chr16	89992452	89992474	rs1312363995	89992458	G	A	1.59276	GGGGGGGGCAGGGGCGGGCCGGG	GGGGGGGACAGGGGCGGGCCGGG	0	1
GRM1	chr6	146571385	146571406	rs1314608250	146571398	G	A	1.59276	GGGATTTGGGAAGGGCCAGGGG	GGGATTTGGGAAGGACCAGGGG	0	1
ACO2	chr22	41903082	41903111	rs1324504358	41903093	G	A	1.59276	GGGAGGGGTGGGGCCTCCGGGGAAATGGGG	GGGAGGGGTGGGACCTCCGGGGAAATGGGG	0	1
SEPT9	chr17	75462481	75462503	rs1325742293	75462491	G	A	1.59276	GGGCTGGAAGGGCCTGGGAGGGG	GGGCTGGAAGGACCTGGGAGGGG	0	1
CAPN10	chr2	241536561	241536583	rs1325836852	241536569	G	A	1.59276	GGGCCGGGGGCCTGGGAGGTGGG	GGGCCGGGGACCTGGGAGGTGGG	0	1
SERPINH1	chr11	75273237	75273259	rs1329537489	75273241	G	A	1.59276	GGGACGGGCAGGAGGGGGTGGGG	GGGACAGGCAGGAGGGGGTGGGG	0	1
[truncated: 378 more rows]

## Sheet: 1 --> 0
Gene	Chromosome	Start	End	Variant name	Position	Reference allelle	Variant allelle	MAF value	G4 sequence with referance allele	G4 sequence with variant allele	m6A motif number in G4 sequence with referance allele	m6A motif number in G4 sequence with variant allele
[truncated: 745 more rows]

[truncated: 2 more sheets: n --> n+1, n --> n-1]
